# Supplementary material
Source: PubMed Central journal article supplement (PMC6784872)

C3001: 43 Female White Cedars–Sinai | CD L3

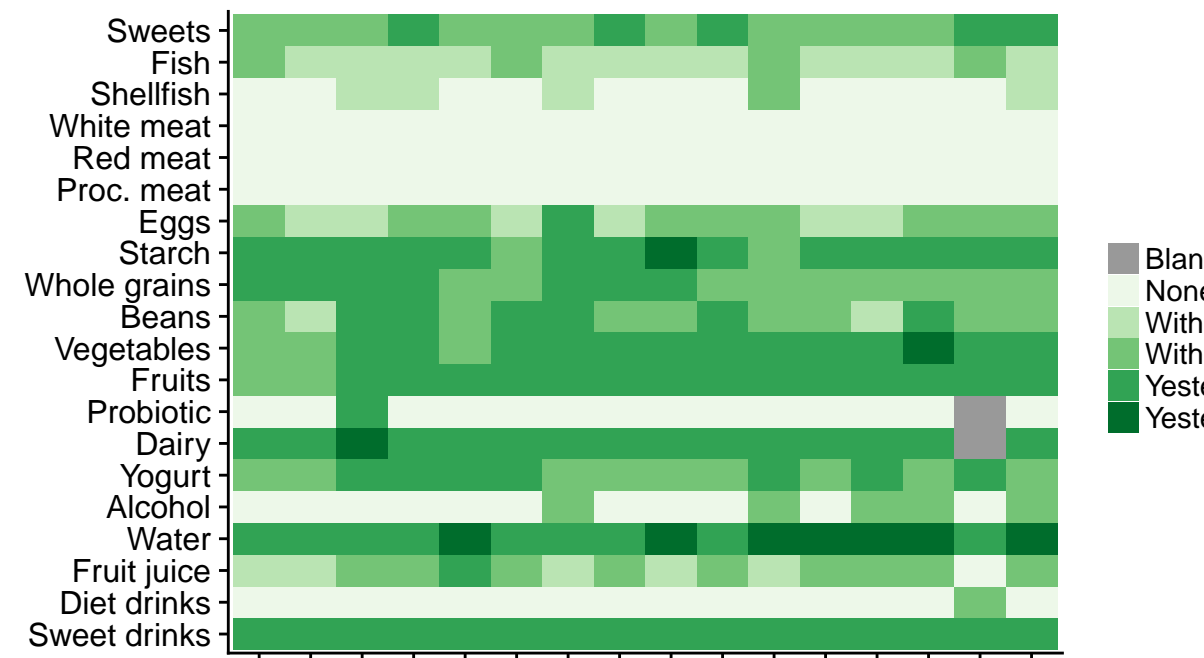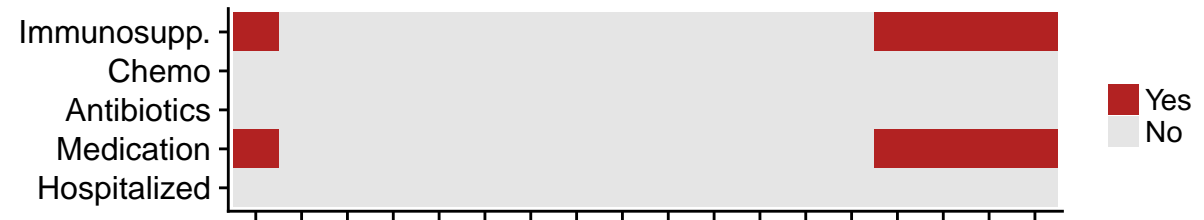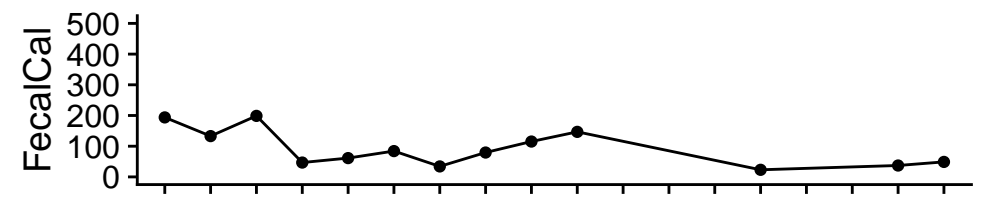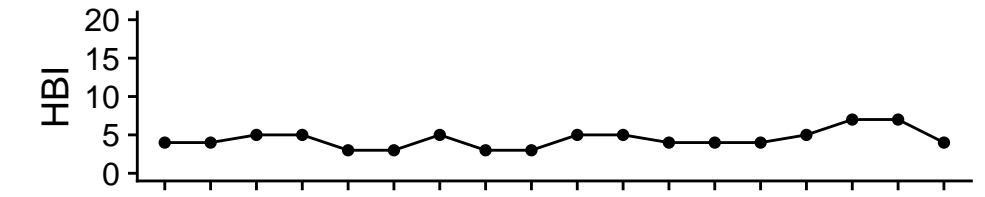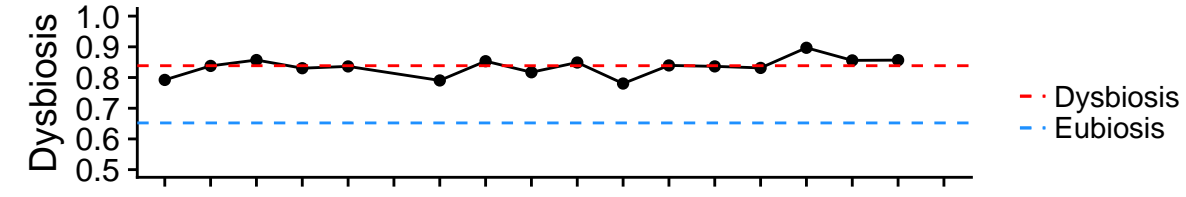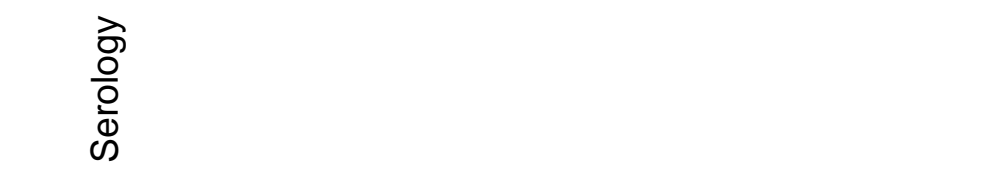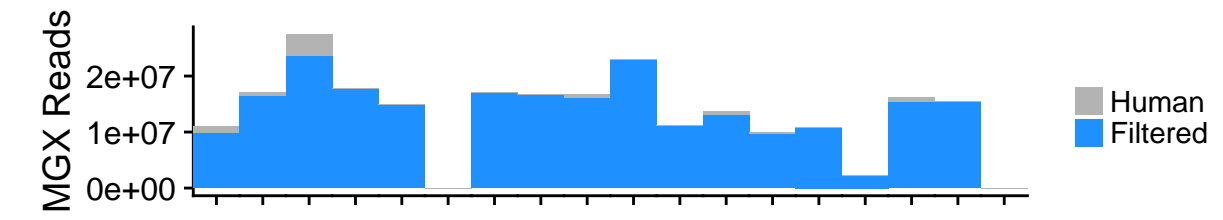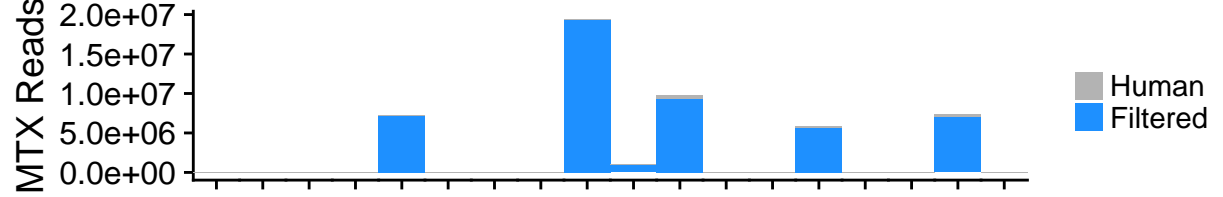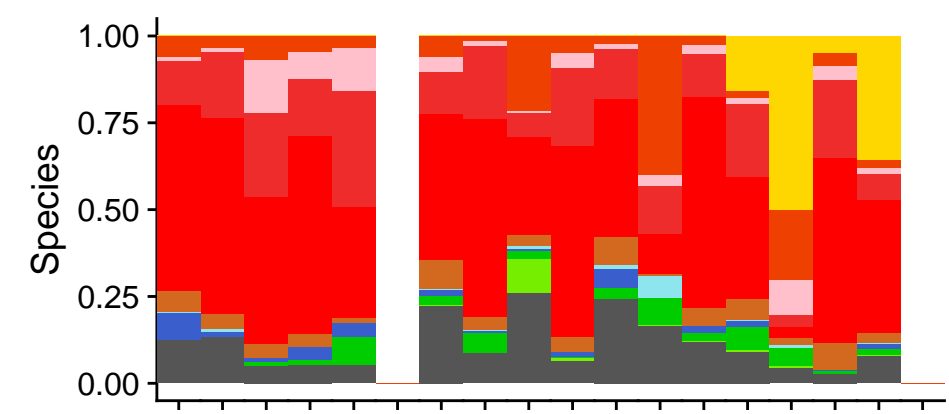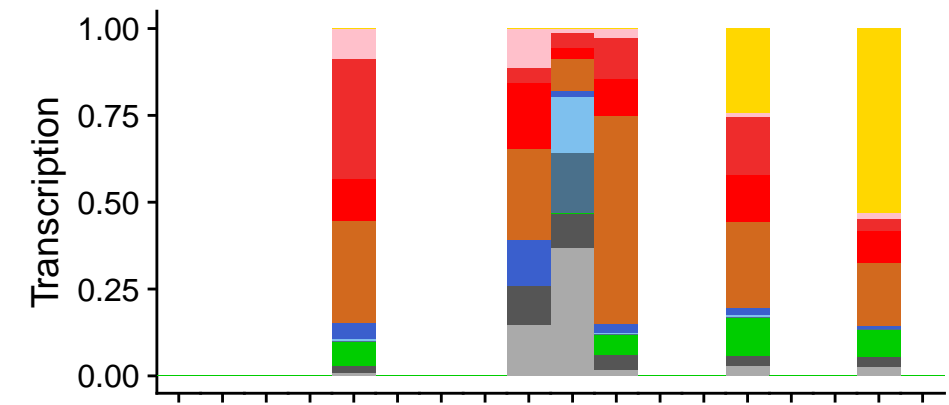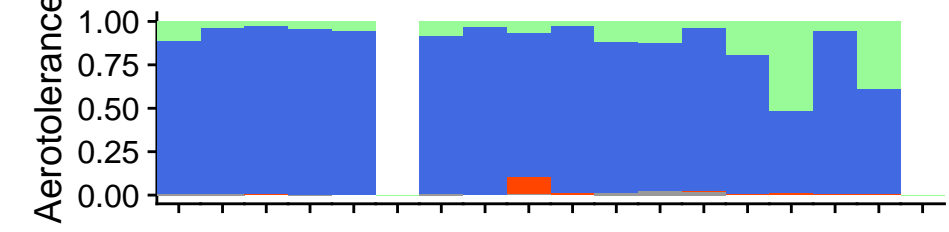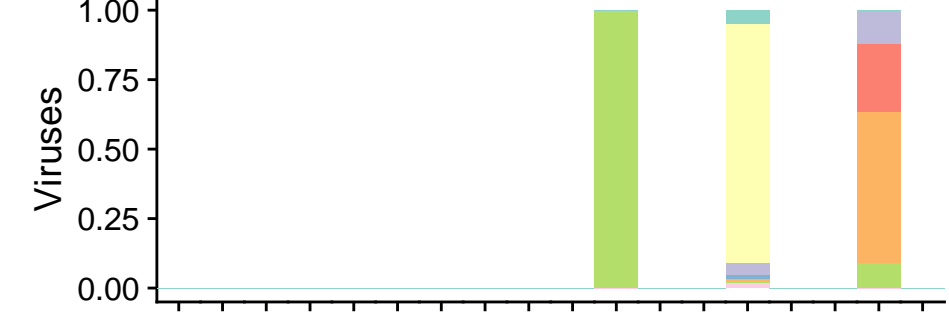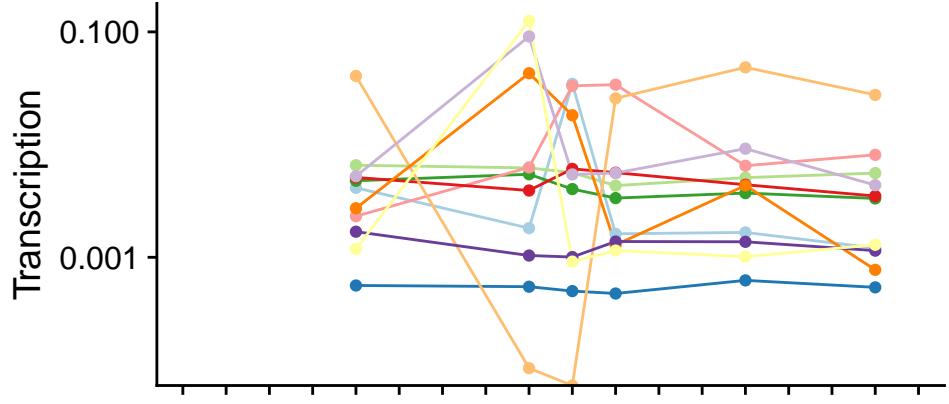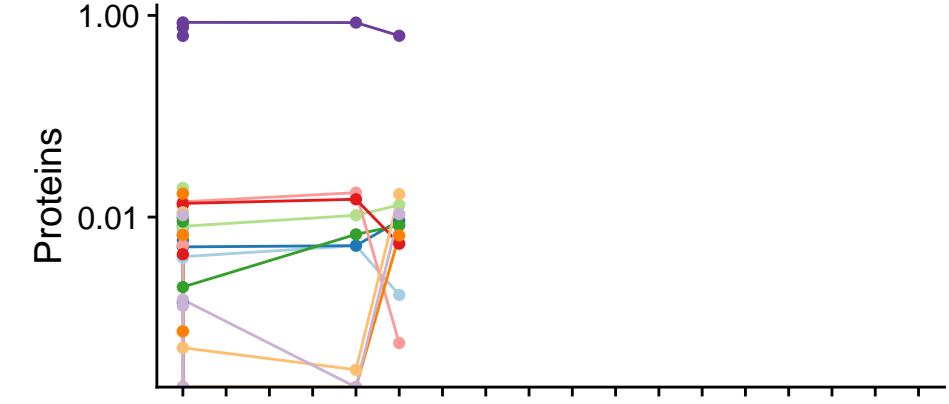

- Alistipes onderdonkii
- Bacteroides caccae
- Bacteroides fragilis
- Bacteroides thetaiotaomicron
- Bacteroides uniformis
- Bacteroides vulgatus
- Eubacterium hallii
- Faecalibacterium prausnitzii
- Akkermansia muciniphila
- Escherichia coli
- other

- Alistipes onderdonkii
- Bacteroides fragilis
- Bacteroides thetaiotaomicron
- Bacteroides uniformis
- Bacteroides vulgatus
- Faecalibacterium prausnitzii
- Roseburia hominis
- Roseburia inulinivorans
- Akkermansia muciniphila
- other
- unclassified

- obligate\_anaerobe
- aerotolerant
- facultative\_anaerobe
- unknown

- Salmonella phage FelixO1
- Escherichia phage ECML-117
- unclassified Myoviridae
- Lactococcus phage 936 sensu lato
- Beet curly top virus
- Pepper mild mottle virus
- Tomato mosaic virus
- Tomato mottle mosaic virus
- other

- K02110: F-type H+-transporting ATPase sub...
- K02529: LacI family transcriptional regulator
- K02863: large subunit ribosomal protein L1
- K02887: large subunit ribosomal protein L20
- K02914: large subunit ribosomal protein L34
- K02992: small subunit ribosomal protein S7
- K04069: pyruvate formate lyase activating en...
- K04077: chaperonin GroEL
- K04078: chaperonin GroES
- K07164: NO\_NAME
- K13993: HSP20 family protein

- K00024: malate dehydrogenase [EC:1.1.1.37]
- K00134: glyceraldehyde 3-phosphate dehydr...
- K00262: glutamate dehydrogenase (NADP+) ...
- K01610: phosphoenolpyruvate carboxykinase...
- K01805: xylose isomerase [EC:5.3.1.5]
- K01812: glucuronate isomerase [EC:5.3.1.12]
- K02358: elongation factor EF-Tu
- K04077: chaperonin GroEL
- K10200: N-acetylglucosamine transport syst...
- UNGROUPED

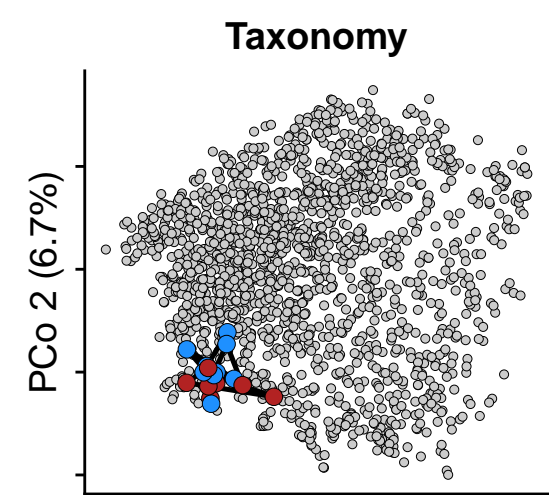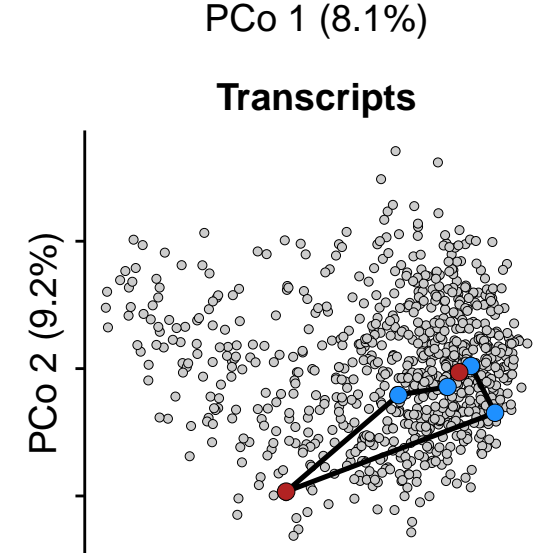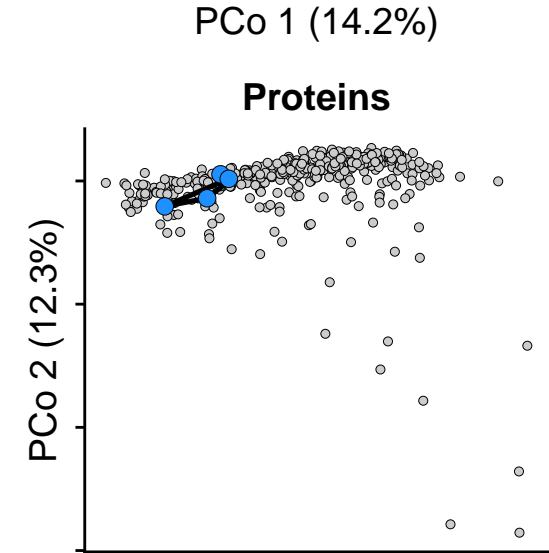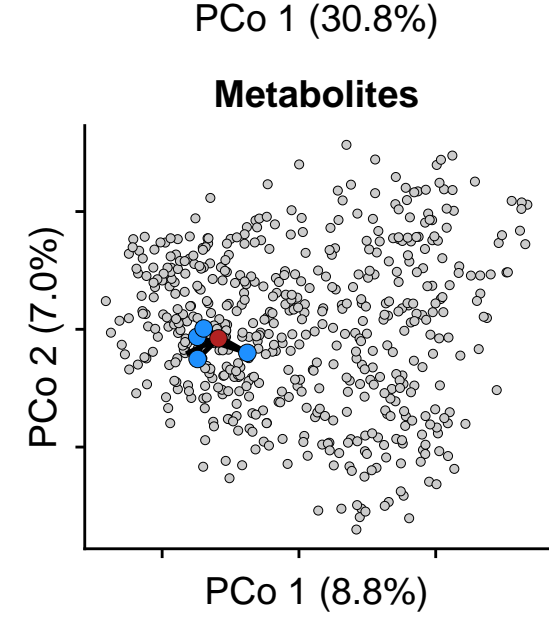

C3002: 76 Female White Cedars-Sinai | CD L3

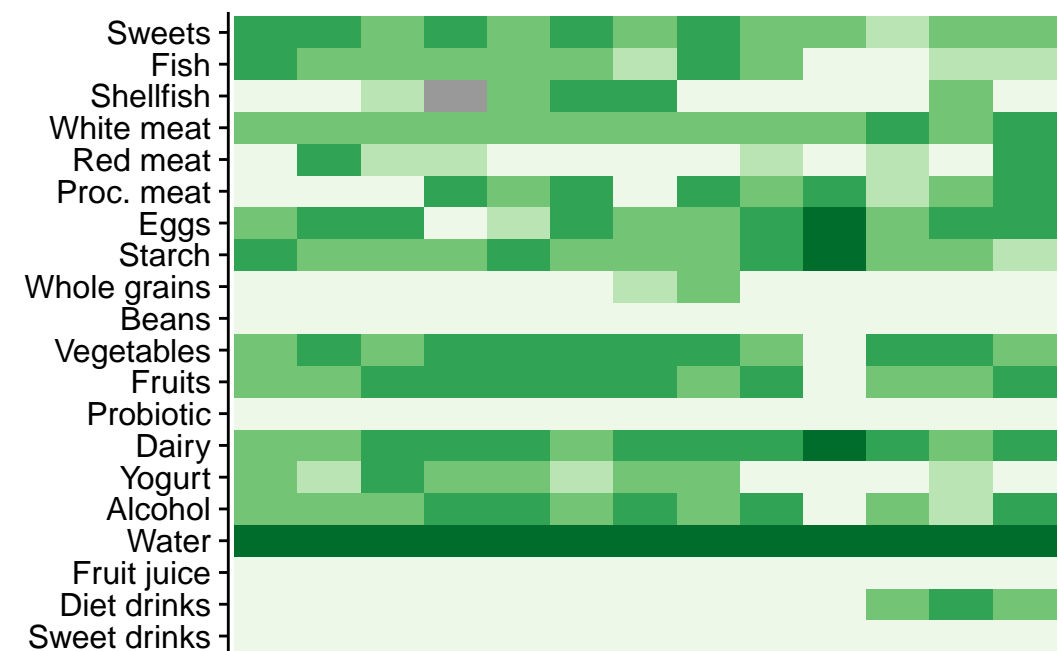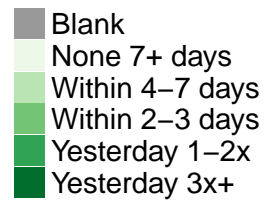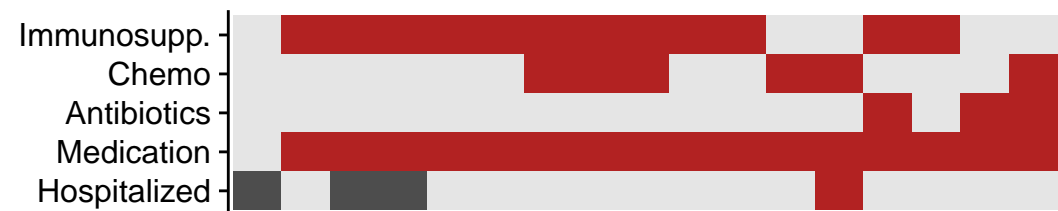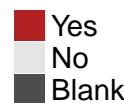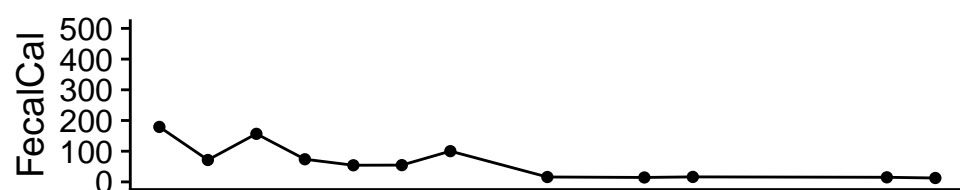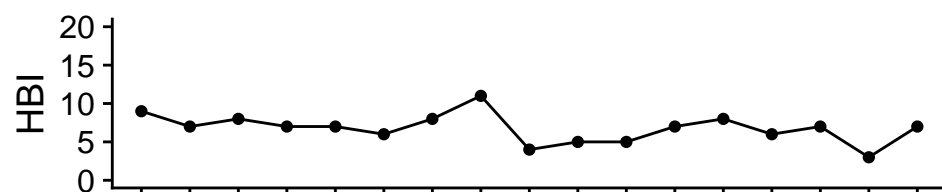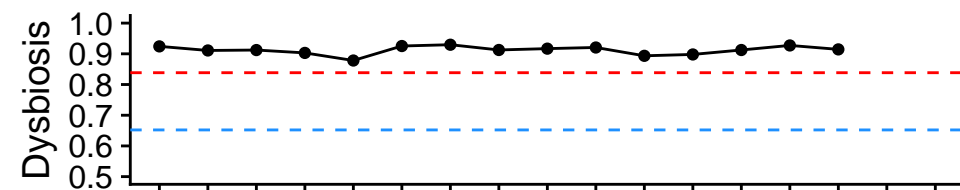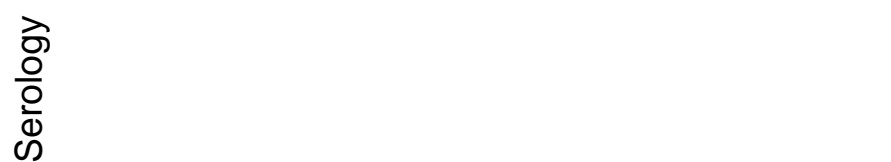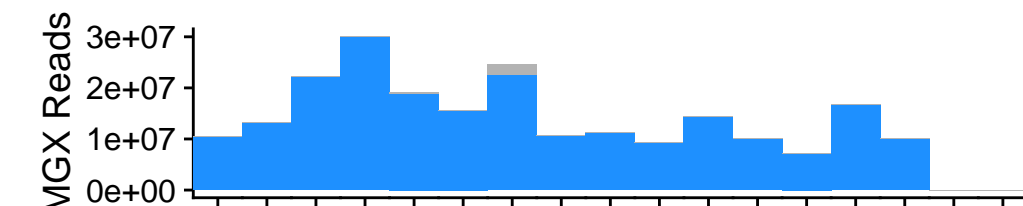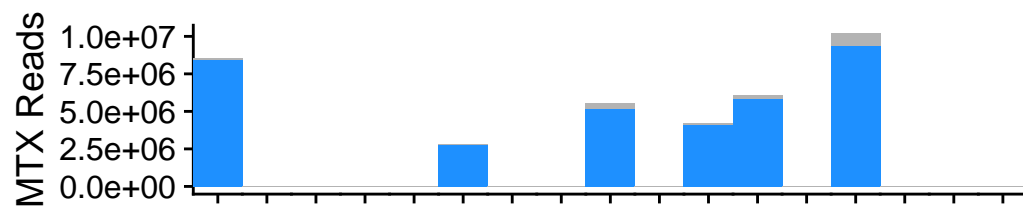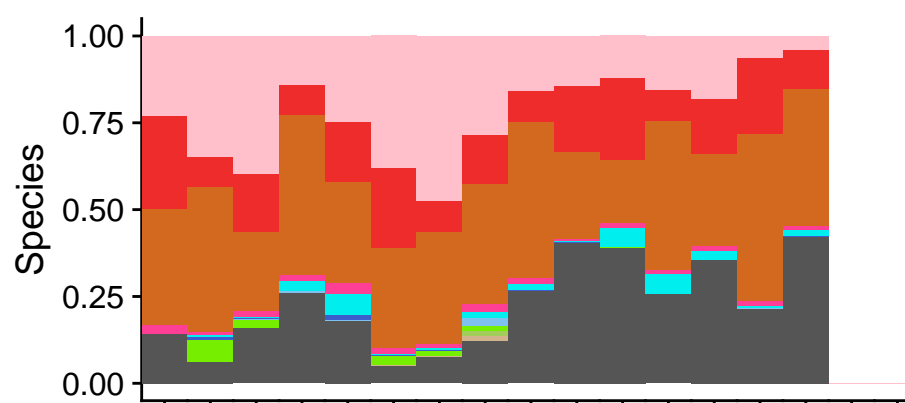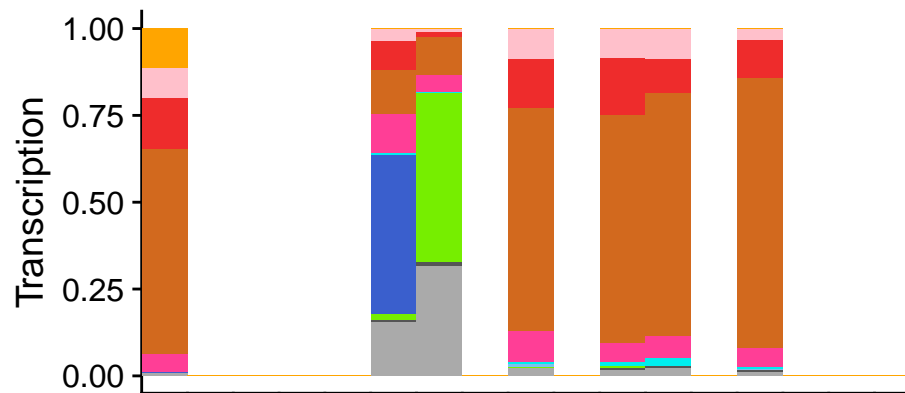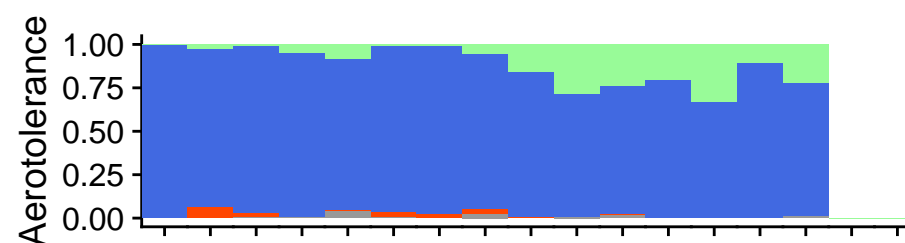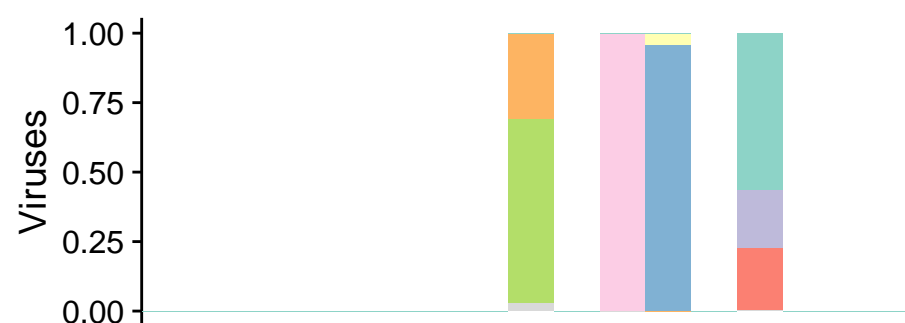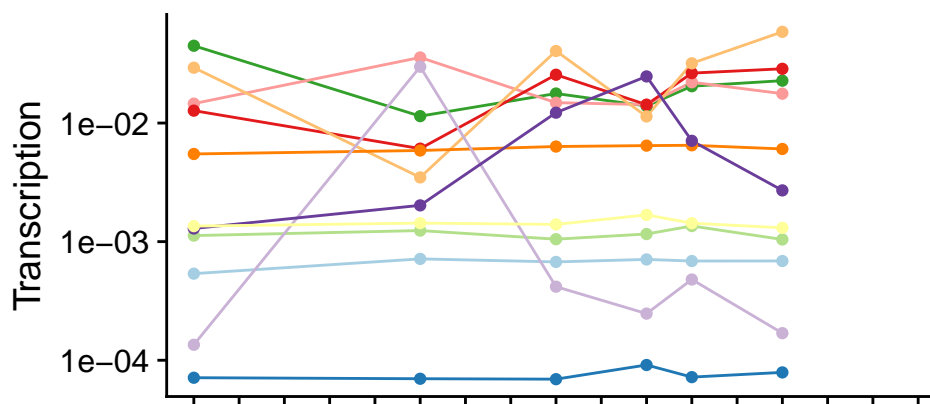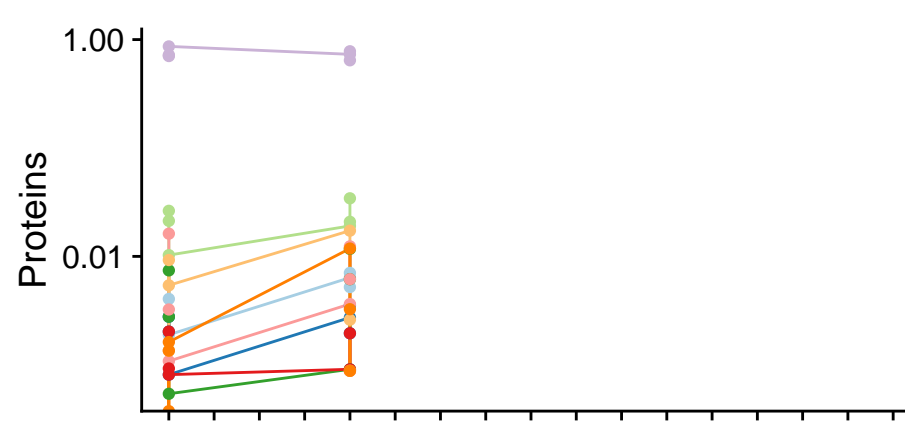

Taxonomy

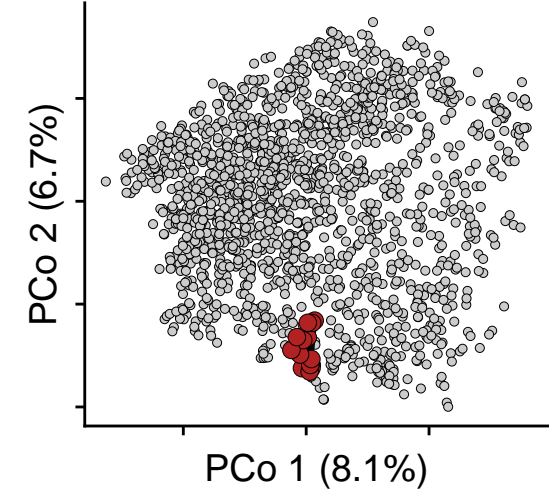

Transcripts

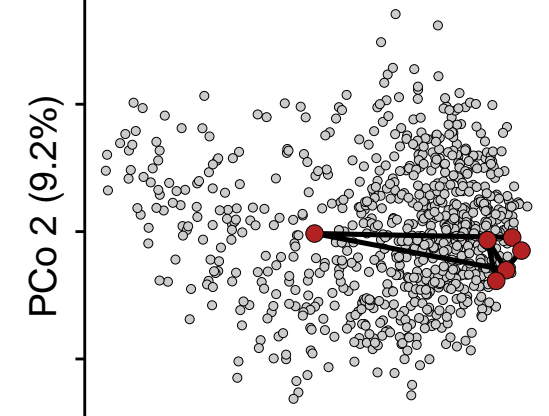

Proteins

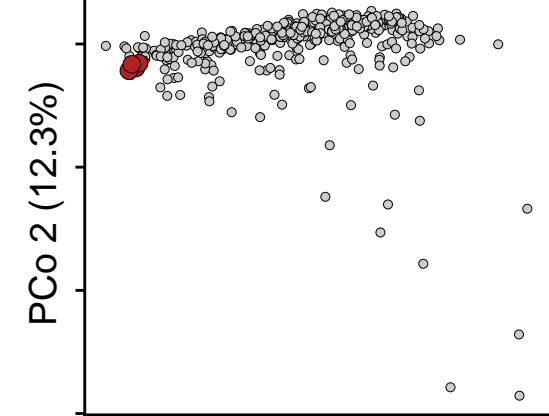

Metabolites

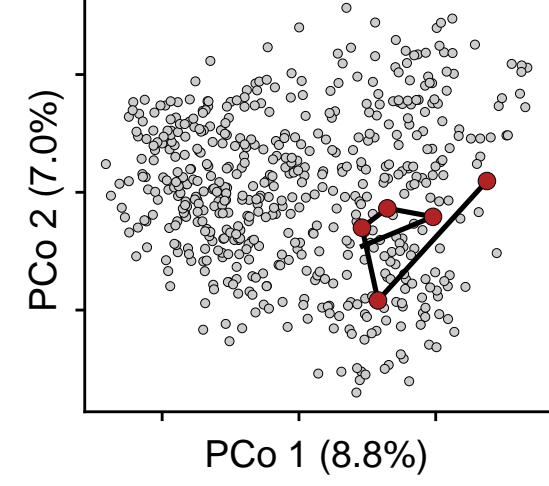

C3003: 43 Female White Cedars–Sinai | UC

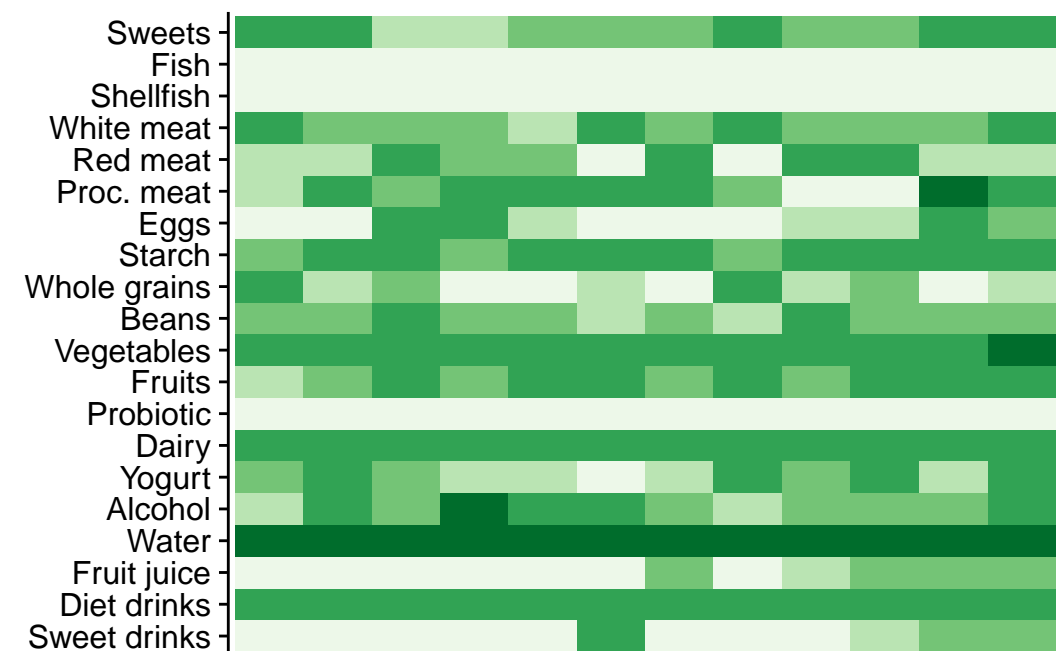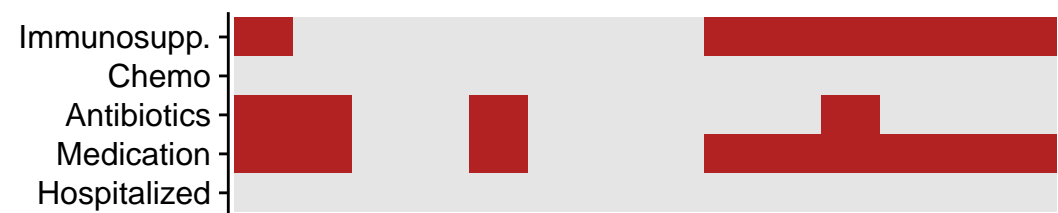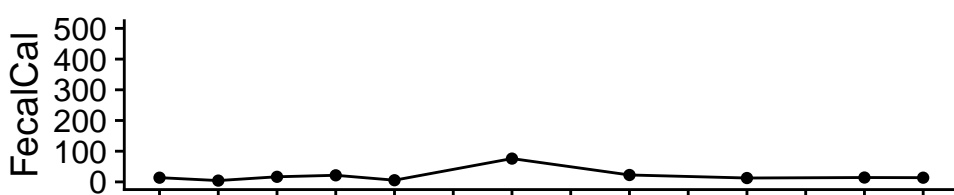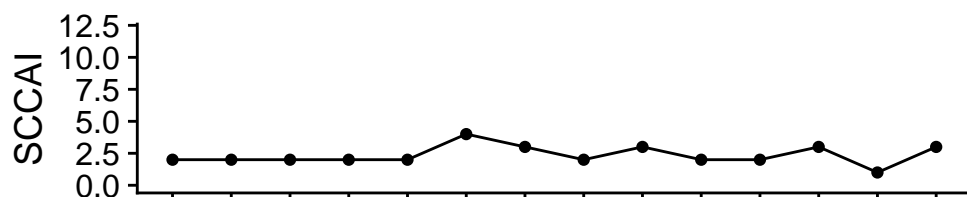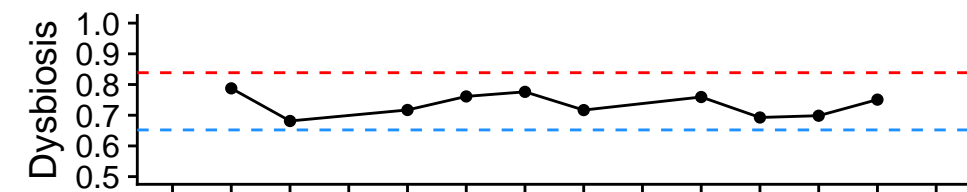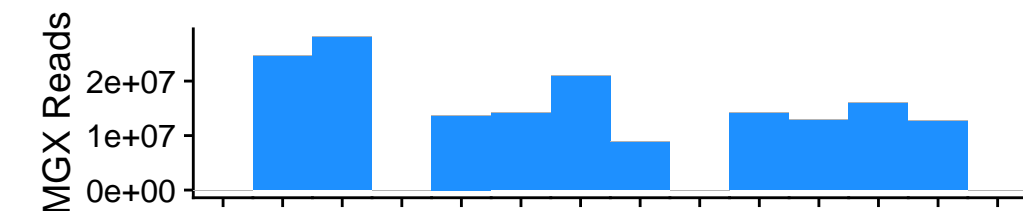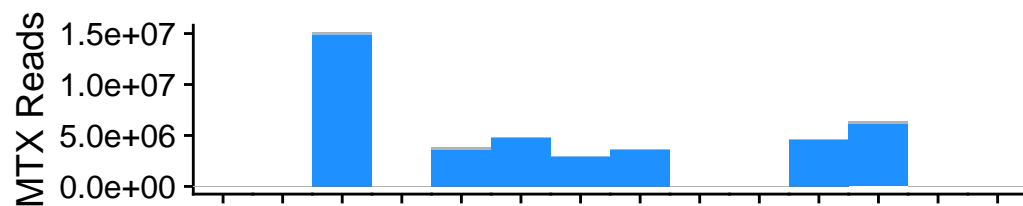

Blank  
None 7+ days  
Within 4–7 days  
Within 2–3 days  
Yesterday 1–2x  
Yesterday 3x+

Yes  
No

Dysbiosis  
Eubiosis

Human  
Filtered

Human  
Filtered

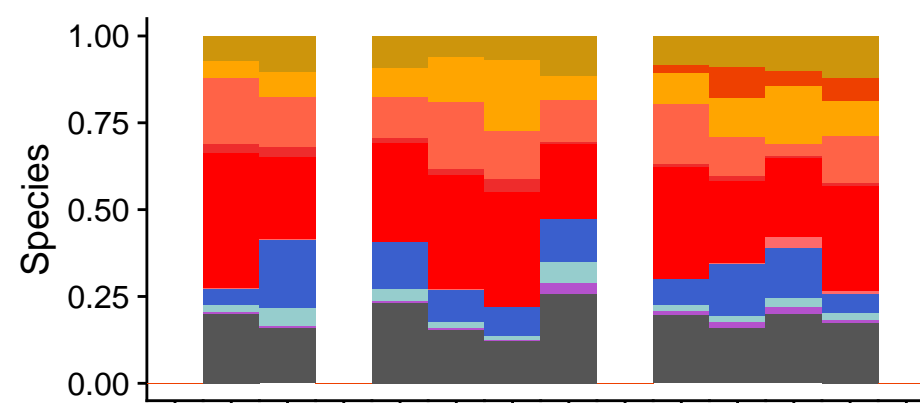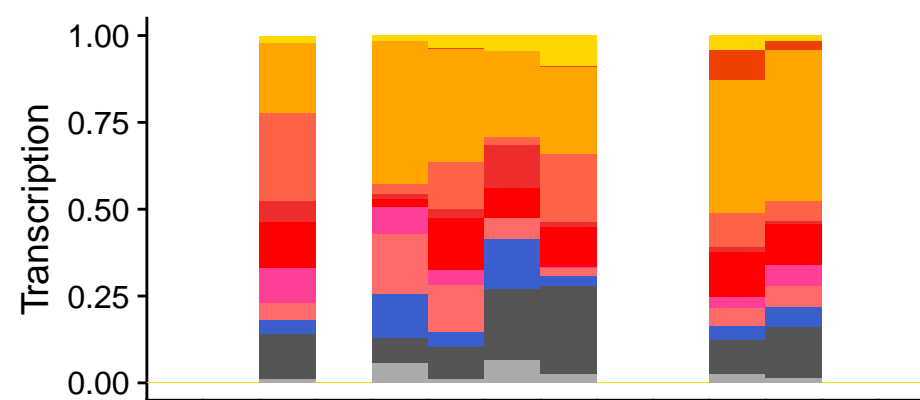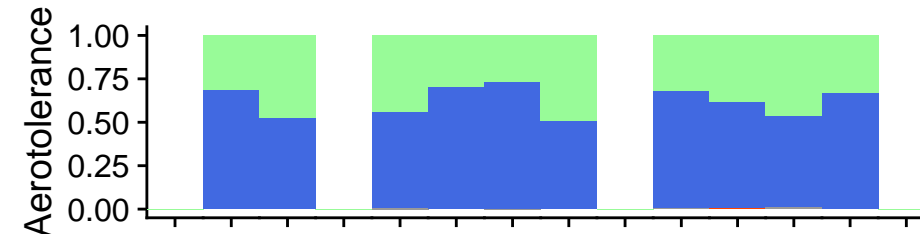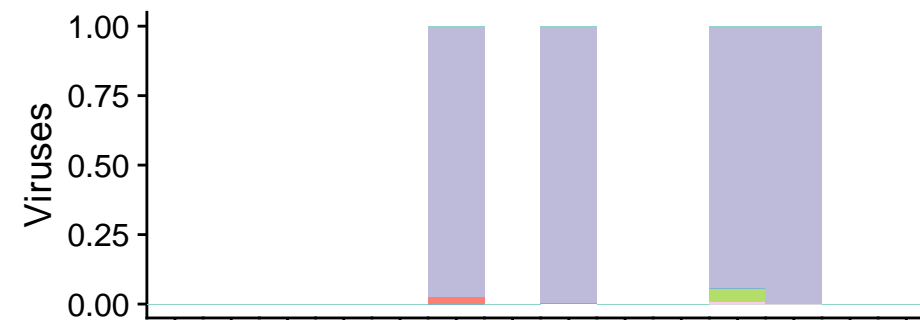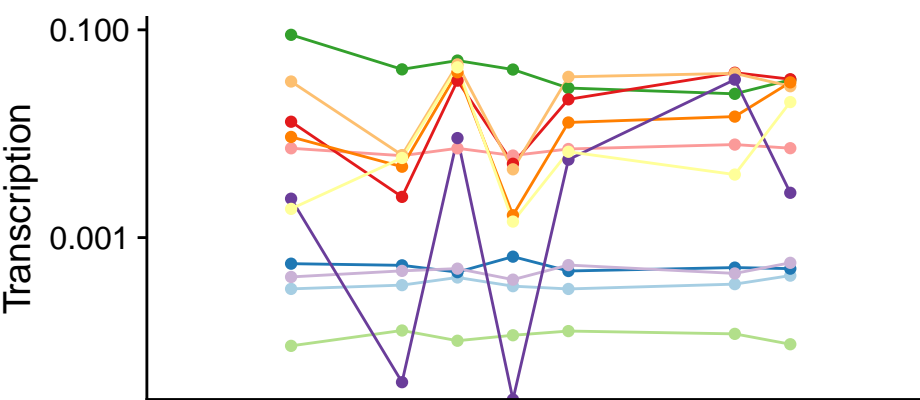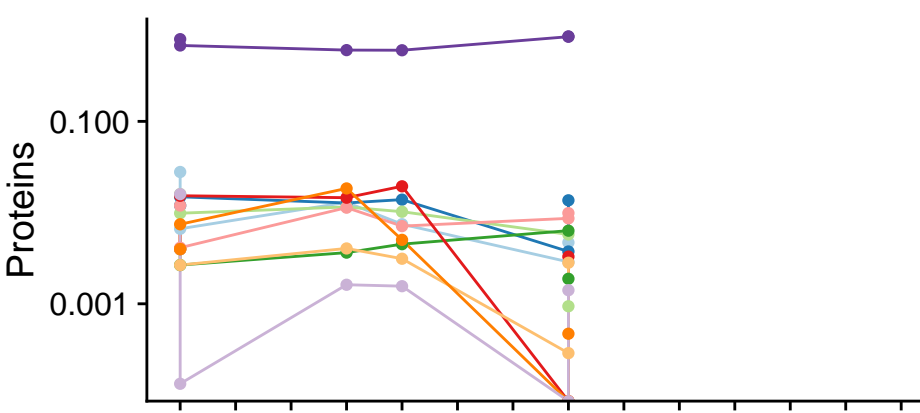

*Alistipes putredinis*  
*Bacteroides caccae*  
*Bacteroides dorei*  
*Bacteroides ovatus*  
*Bacteroides thetaiotaomicron*  
*Bacteroides uniformis*  
*Parabacteroides distasonis*  
*Faecalibacterium prausnitzii*  
*Subdoligranulum unclassified*  
*Ruminococcus bromii*  
other

*Alistipes onderdonkii*  
*Bacteroides caccae*  
*Bacteroides dorei*  
*Bacteroides ovatus*  
*Bacteroides thetaiotaomicron*  
*Bacteroides uniformis*  
*Bacteroides xylanisolvens*  
*Parabacteroides distasonis*  
*Faecalibacterium prausnitzii*  
other  
unclassified

obligate\_anaerobe  
aerotolerant  
facultative\_anaerobe  
unknown

Sk1virus  
Leuconostoc phage phiLN03  
Gokushovirus WZ–2015a  
Pepper mild mottle virus  
Tobacco mild green mosaic virus  
Tobacco mosaic virus  
Tomato mosaic virus  
Tomato mottle mosaic virus  
other

K01662: 1–deoxy–D–xylulose–5–phosphate ...  
K01714: 4–hydroxy–tetrahydrodipicolinate sy...  
K01886: glutamyl–tRNA synthetase [EC:6....  
K02078: acyl carrier protein  
K02899: large subunit ribosomal protein L27  
K02914: large subunit ribosomal protein L34  
K03088: RNA polymerase sigma–70 factor, E...  
K04078: chaperonin GroES  
K06942: NO\_NAME  
K07154: NO\_NAME  
K13993: HSP20 family protein

K00134: glyceraldehyde 3–phosphate dehydr...  
K00262: glutamate dehydrogenase (NADP+) ...  
K01610: phosphoenolpyruvate carboxykinase...  
K01804: L–arabinose isomerase [EC:5.3.1.4]  
K01812: glucuronate isomerase [EC:5.3.1.12]  
K02358: elongation factor EF–Tu  
K02867: large subunit ribosomal protein L11  
K04077: chaperonin GroEL  
K09475: outer membrane pore protein C  
UNGROUPED

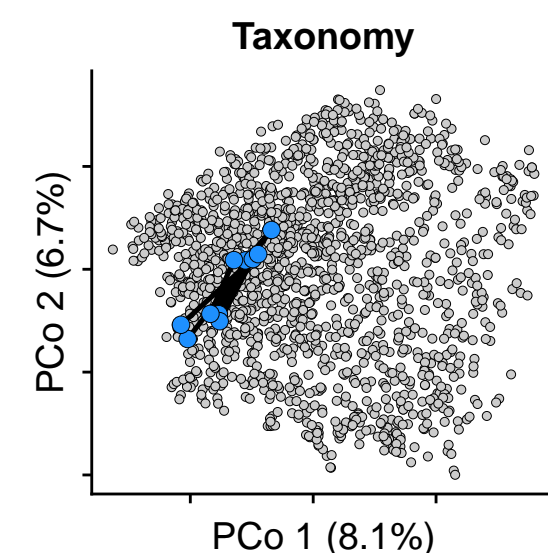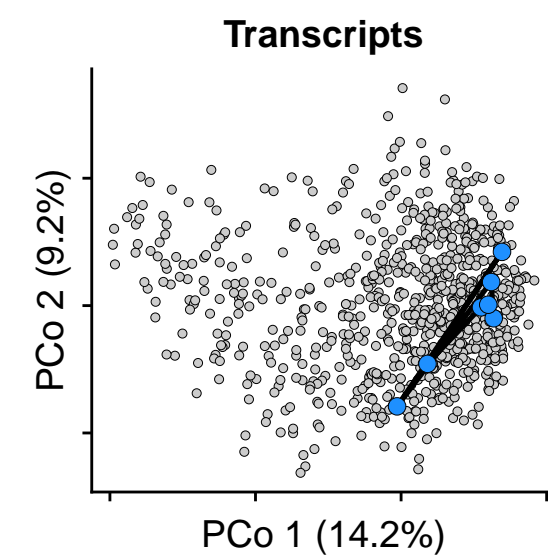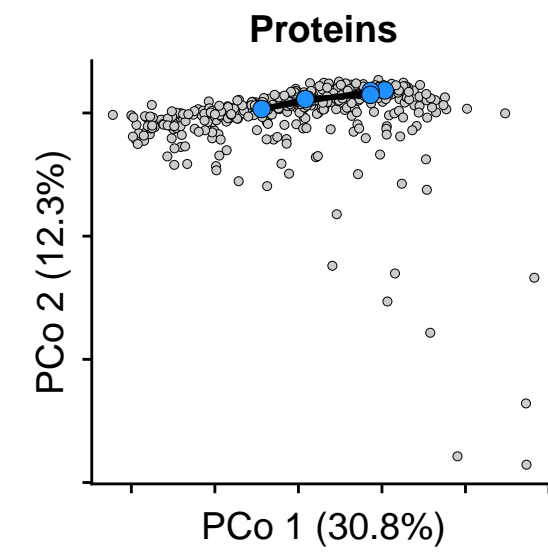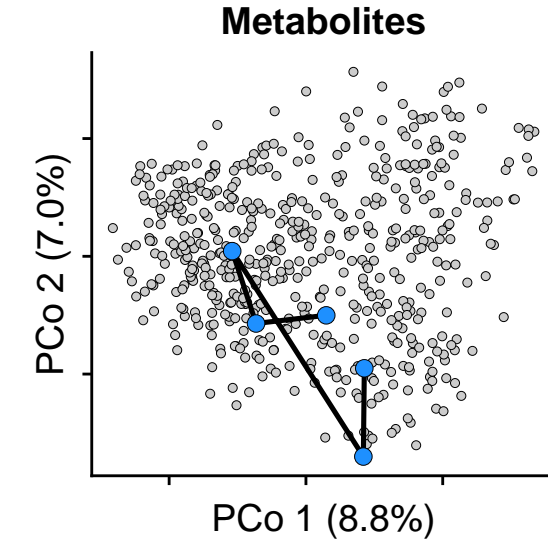

C3004: 47 Female White Cedars–Sinai | UC

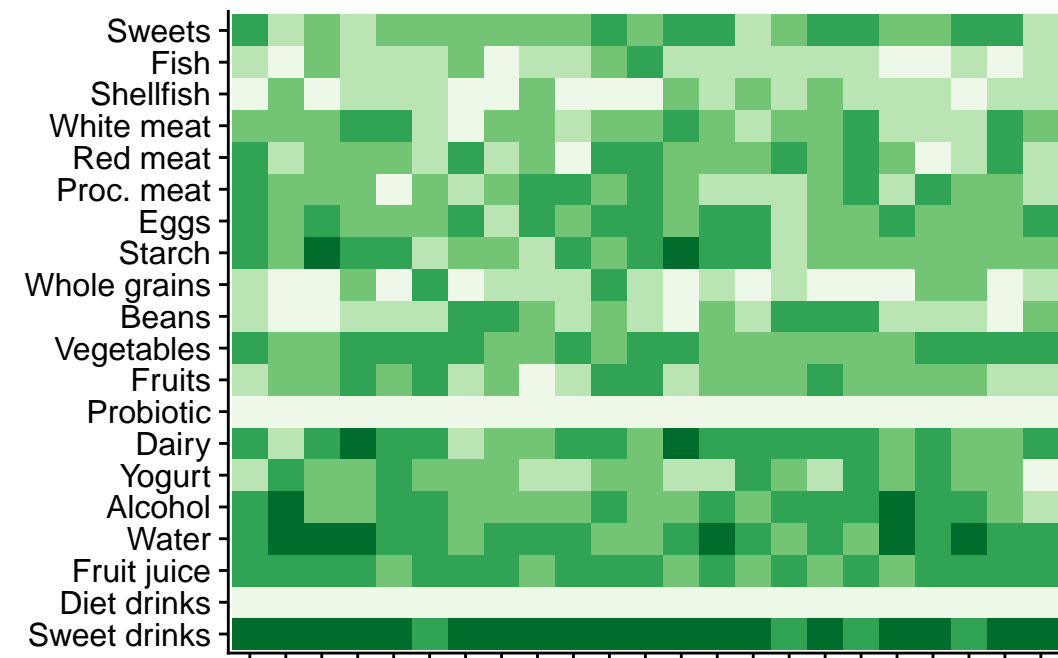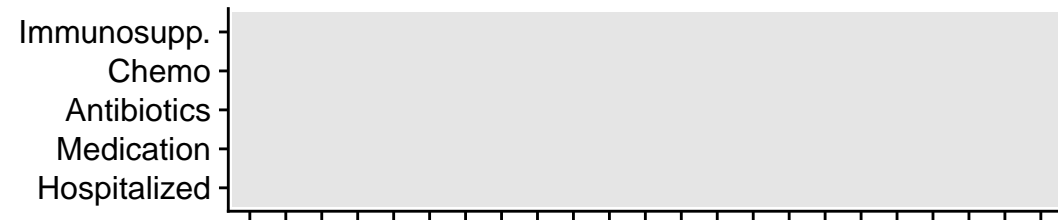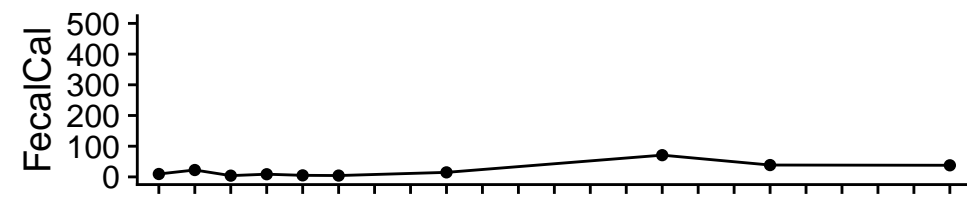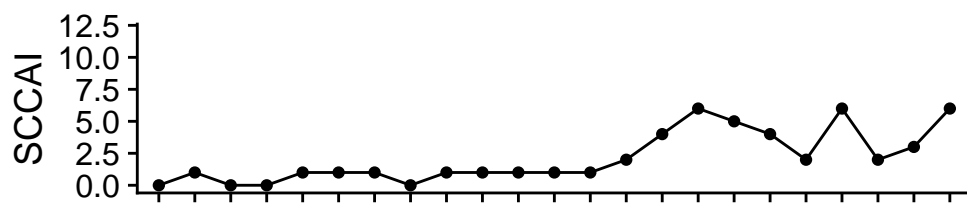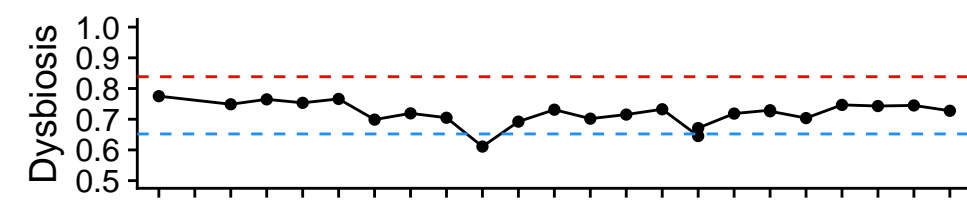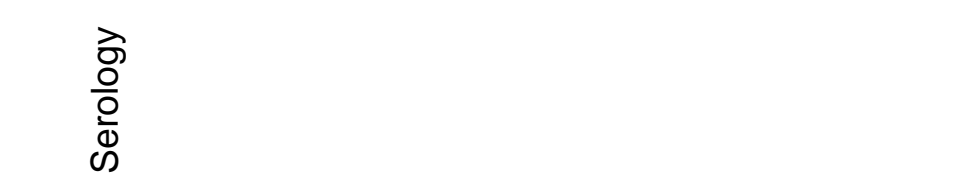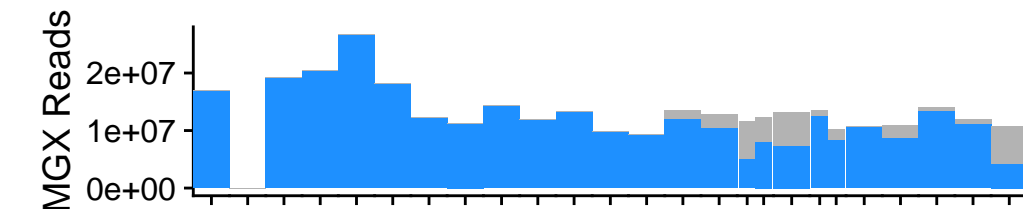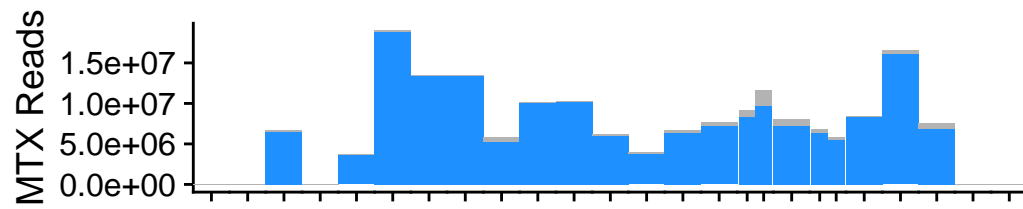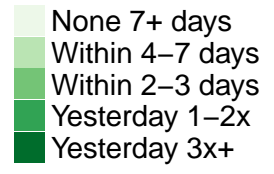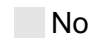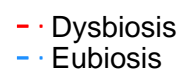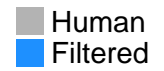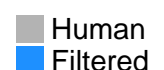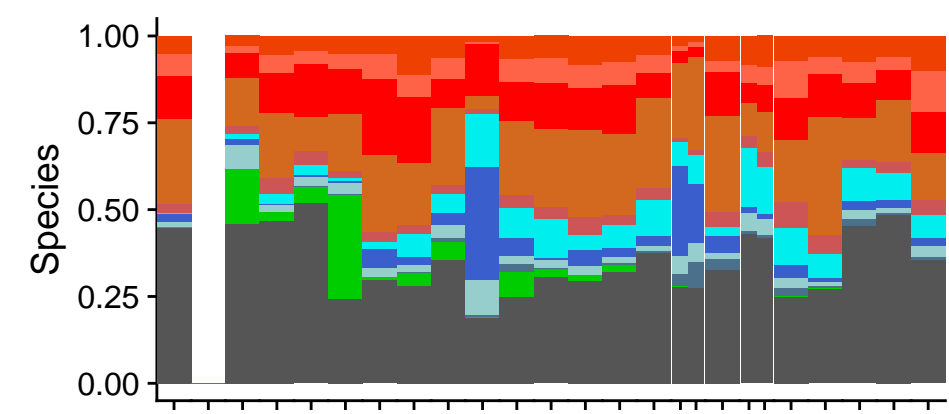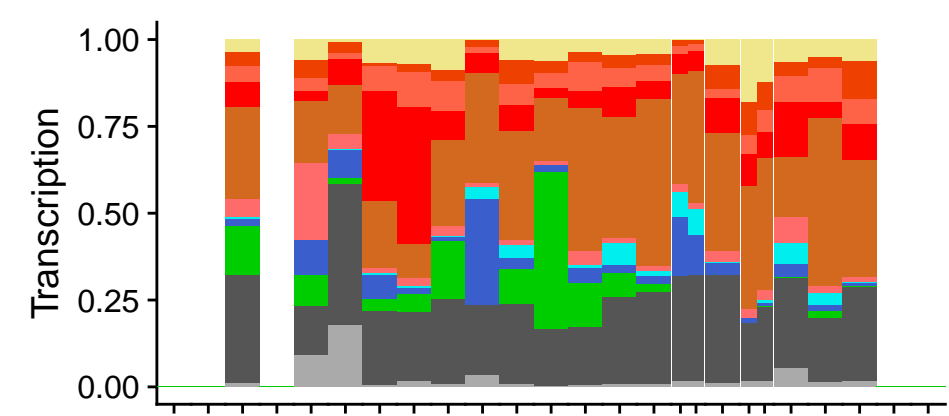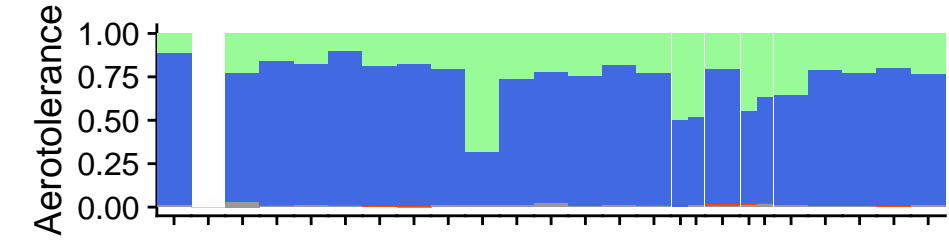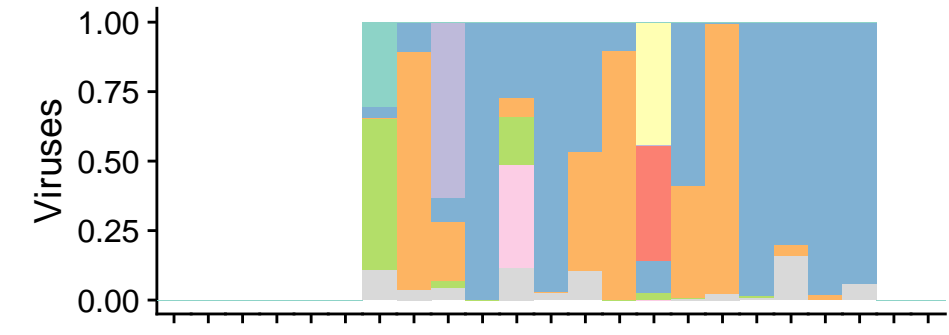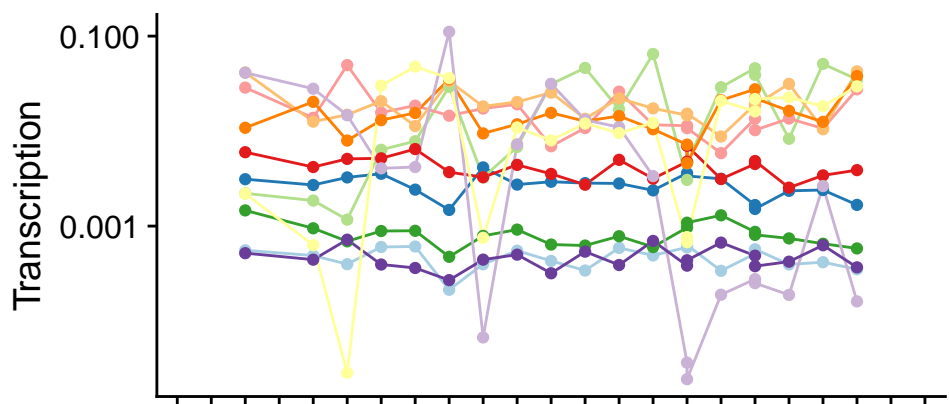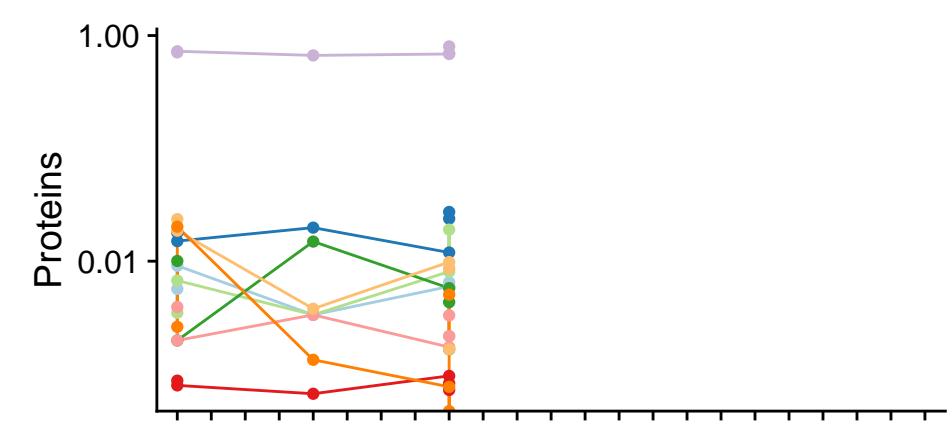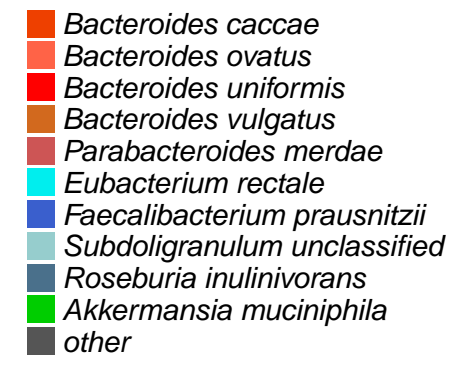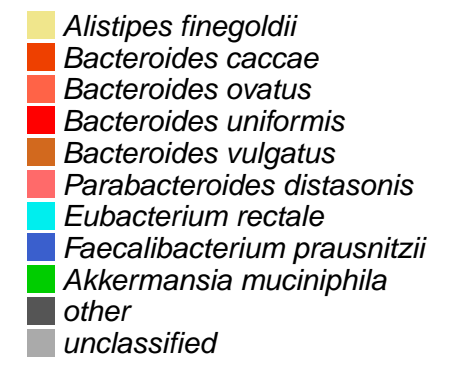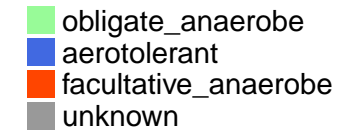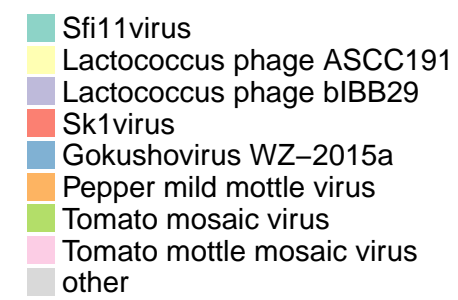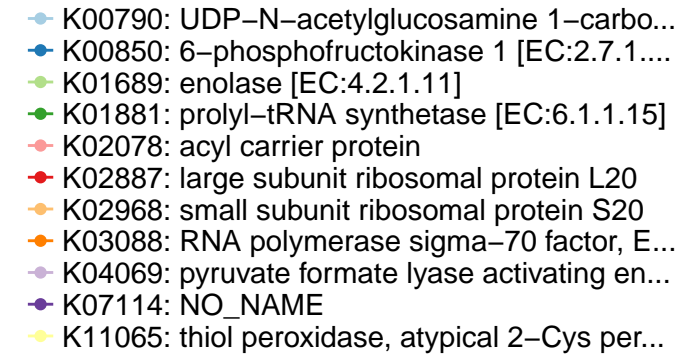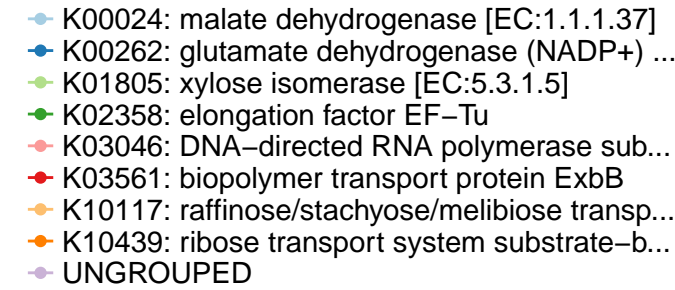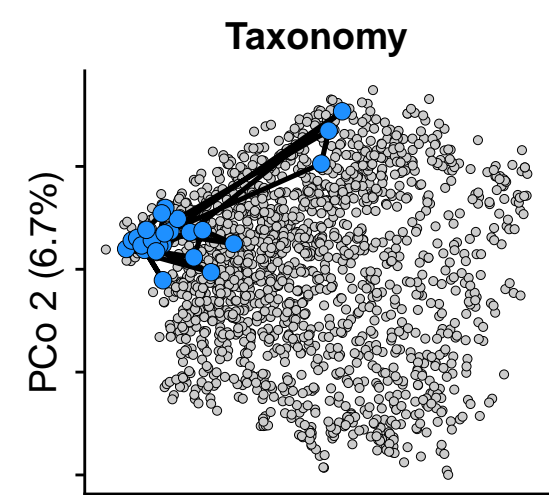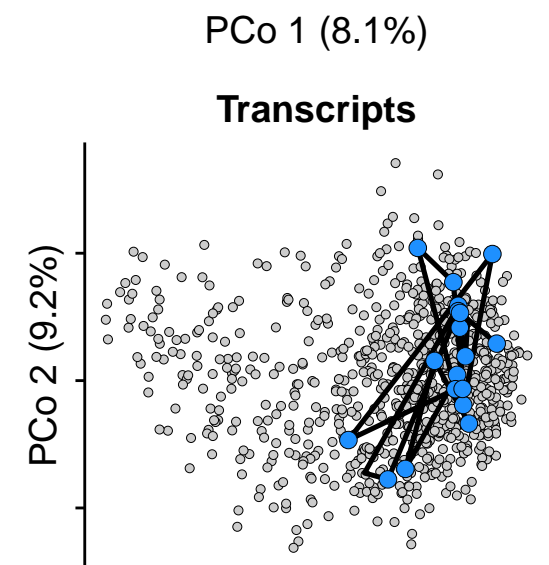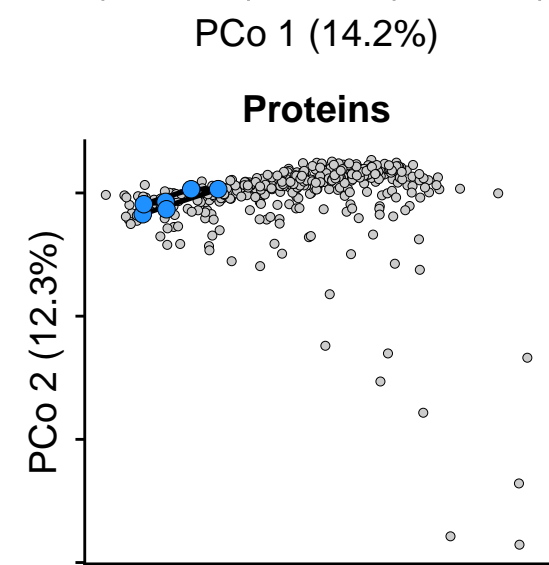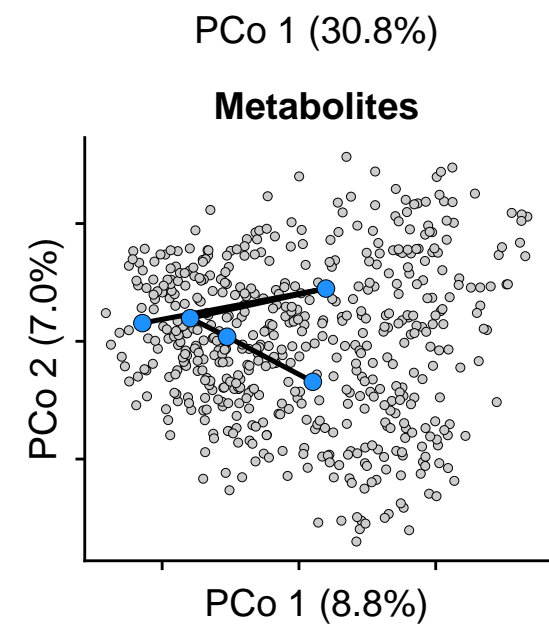

C3005: 76 Female White Cedars–Sinai | UC

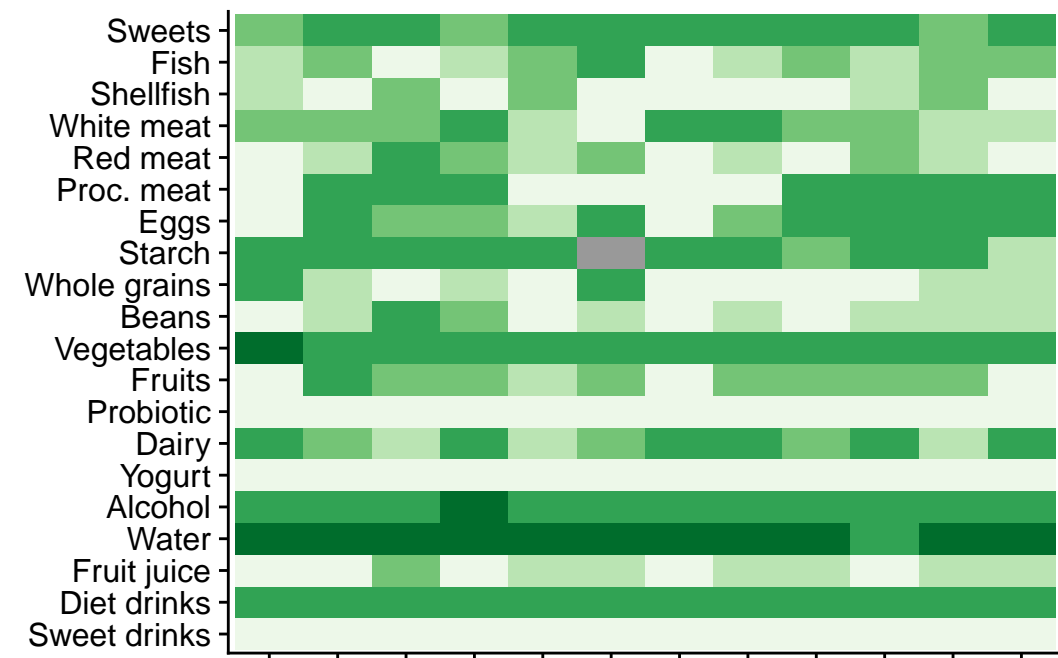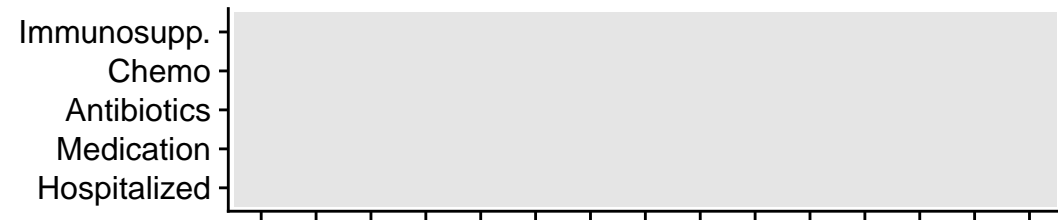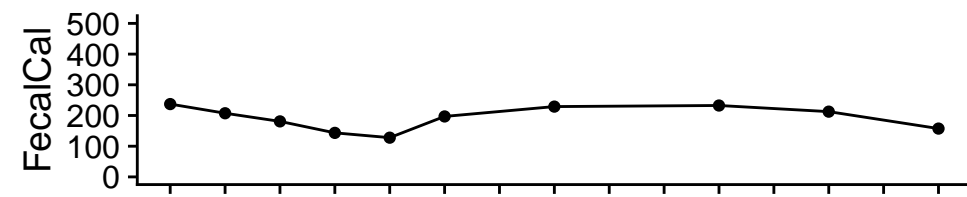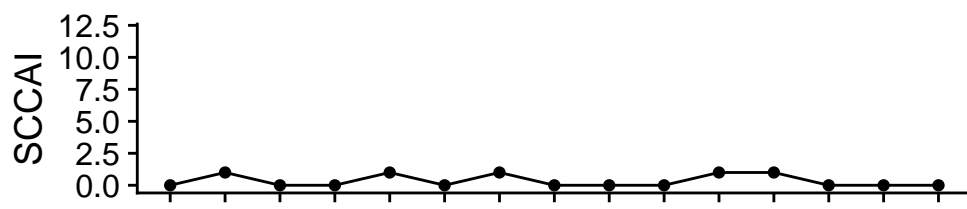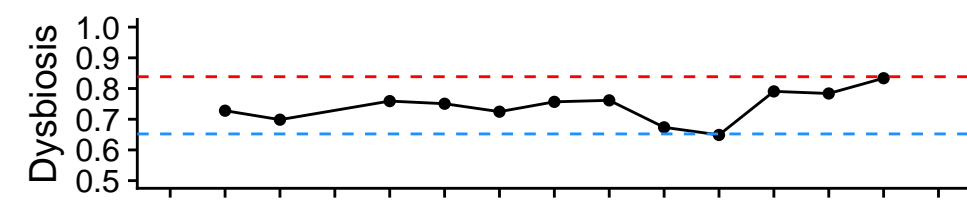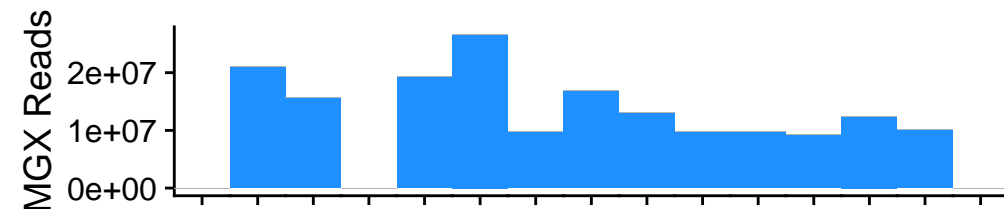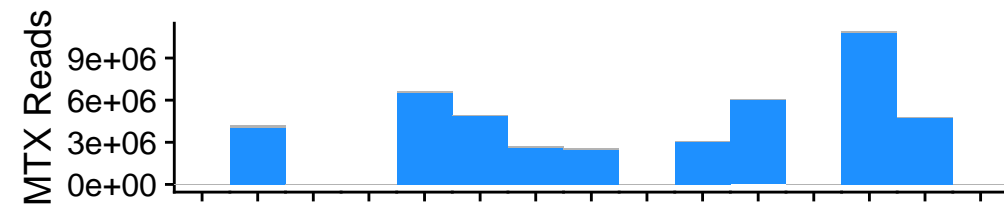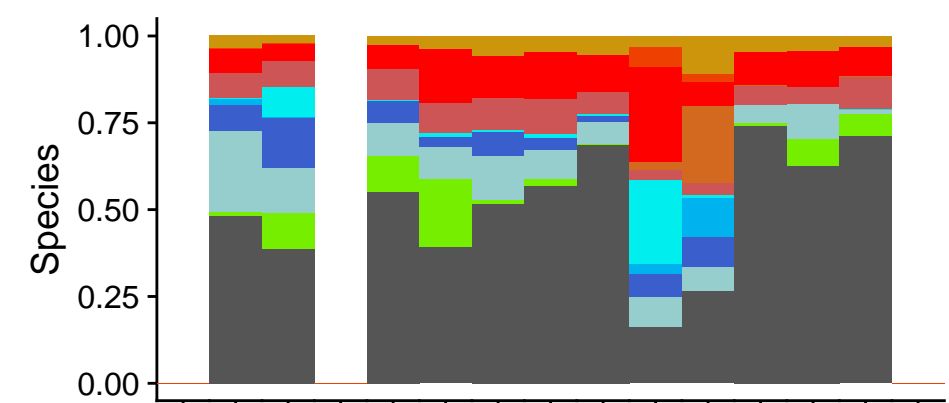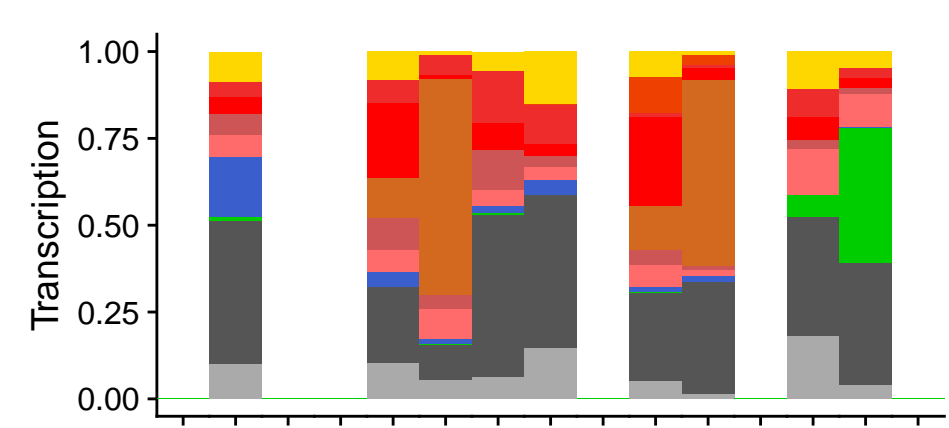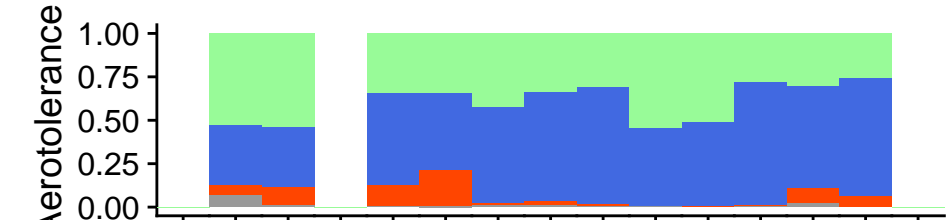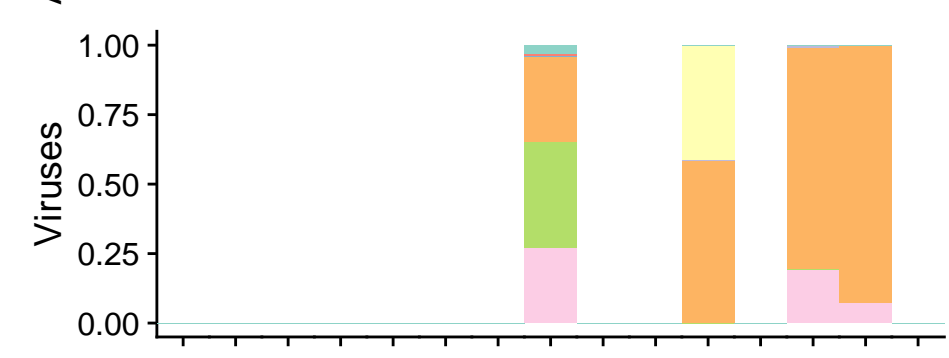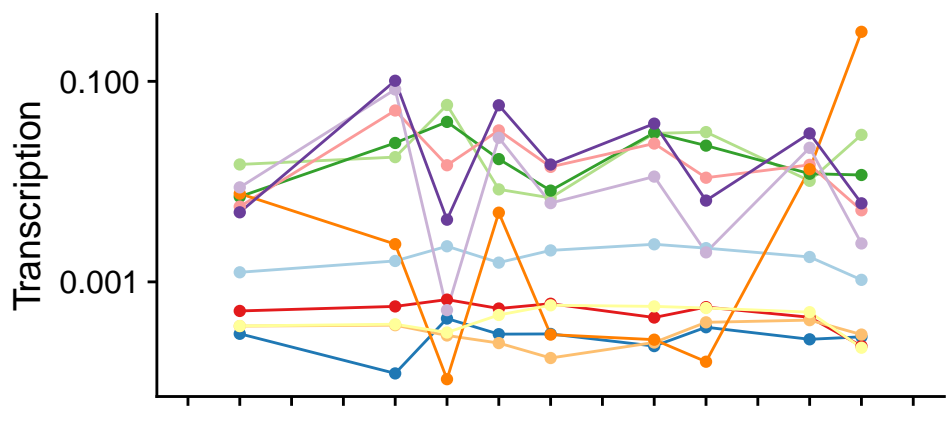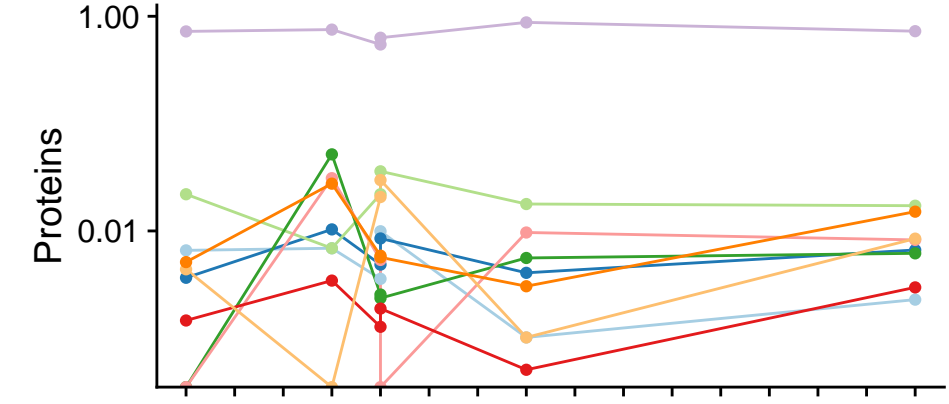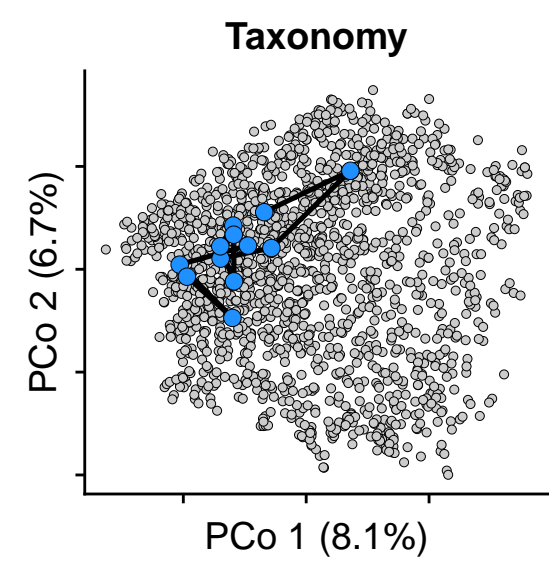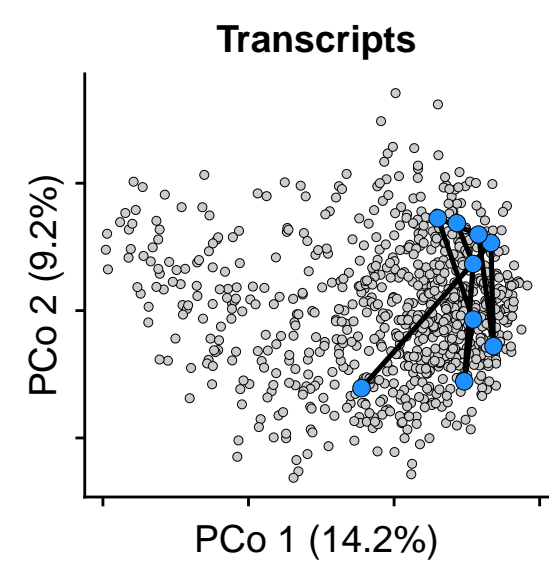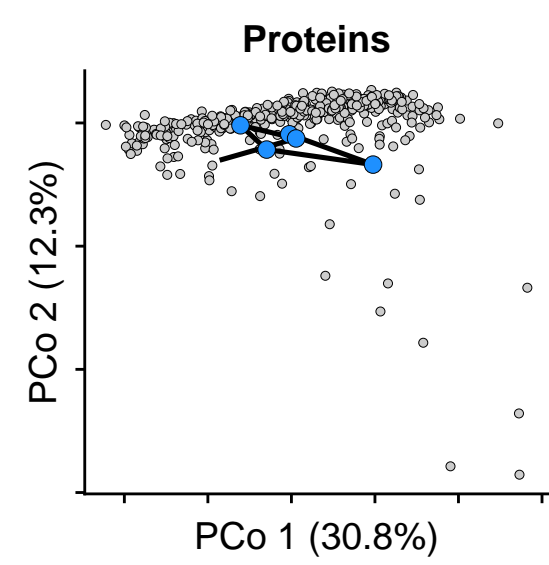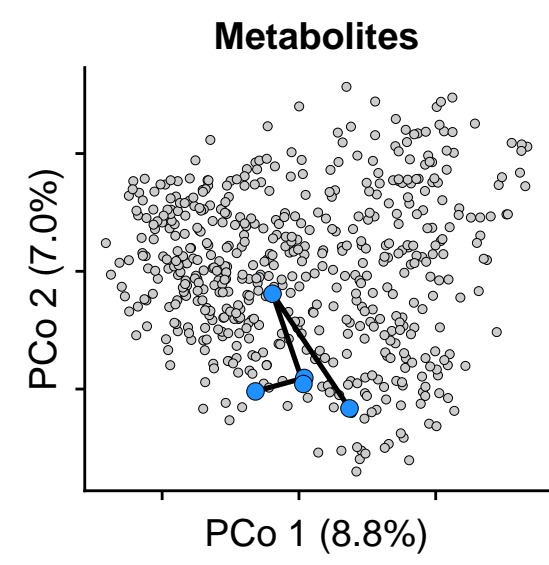

C3006: 32 Male White Cedars–Sinai | UC

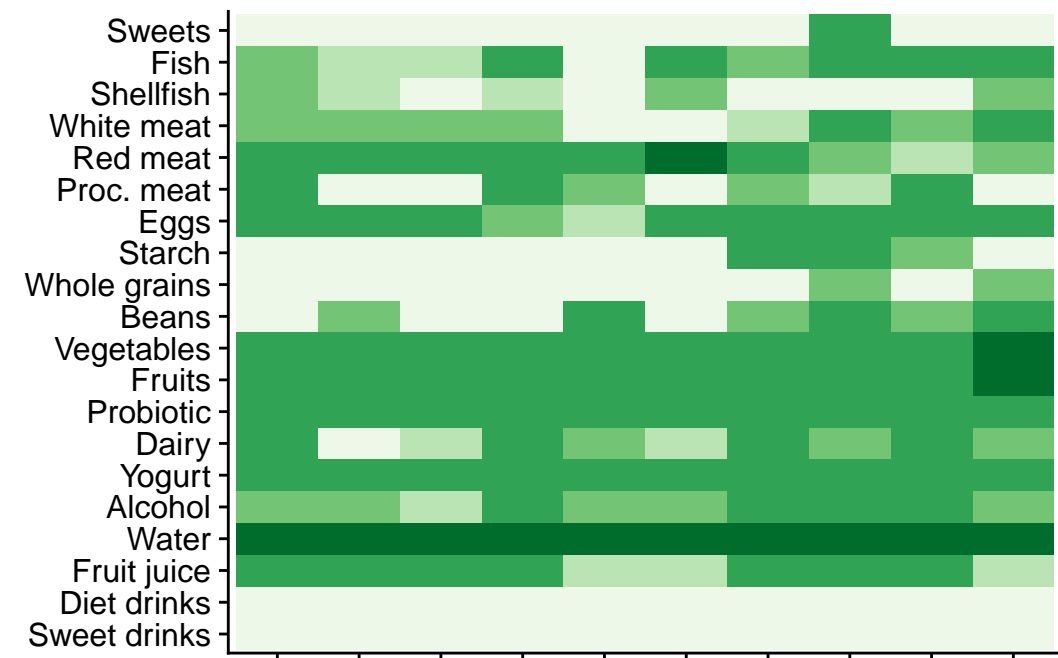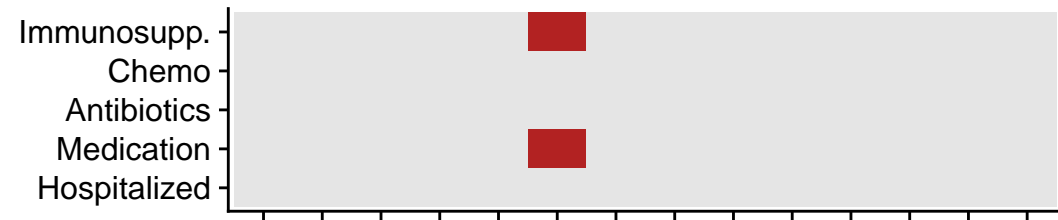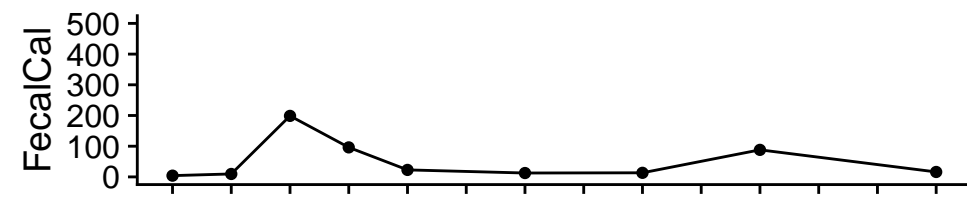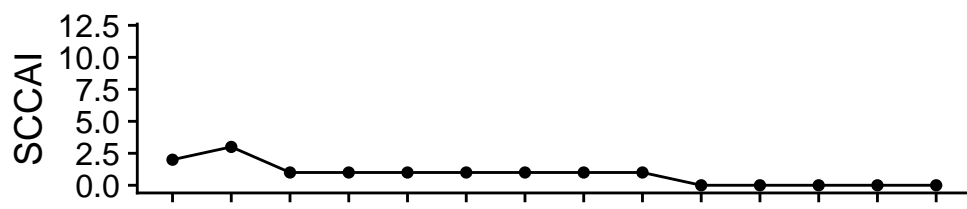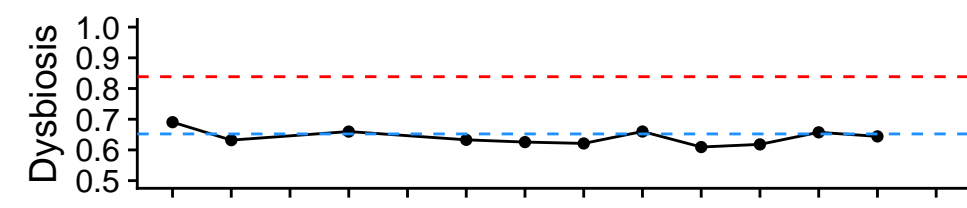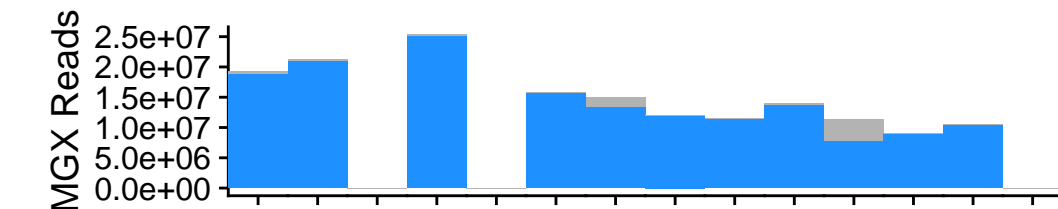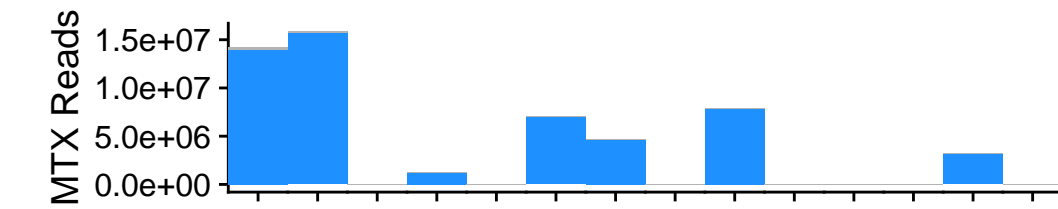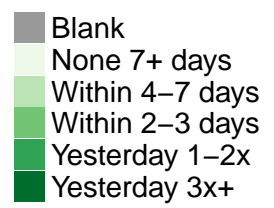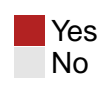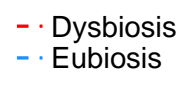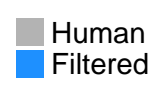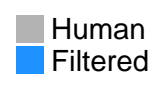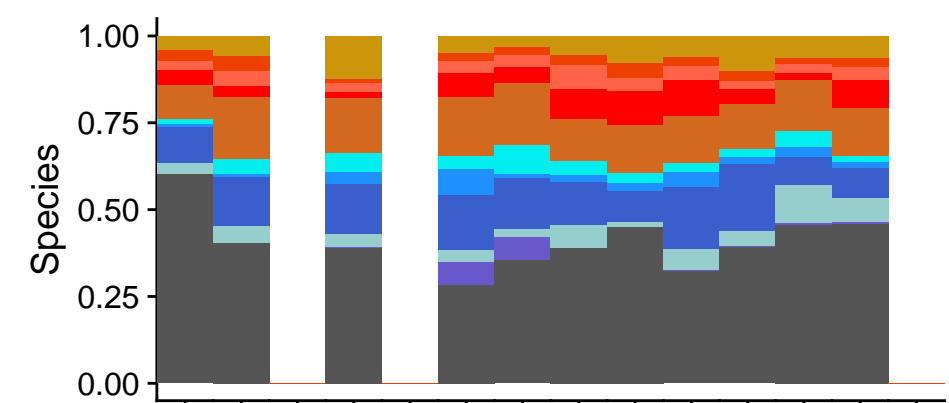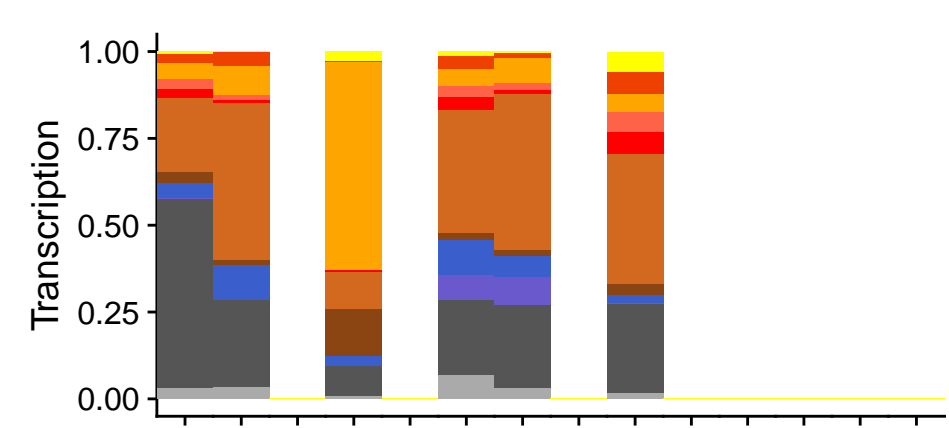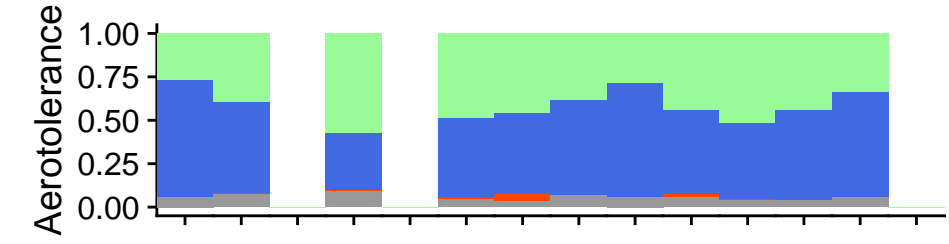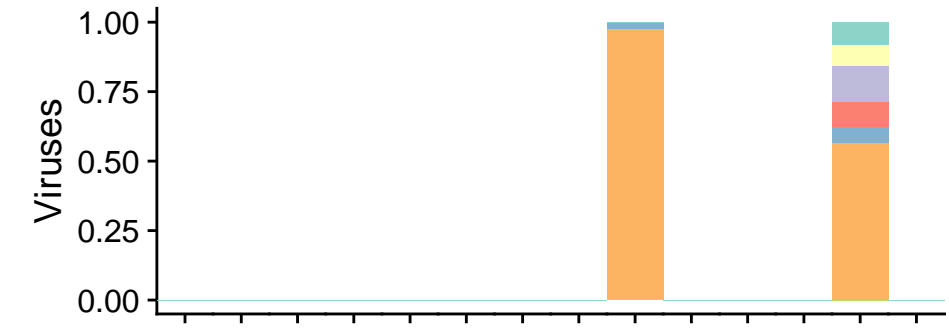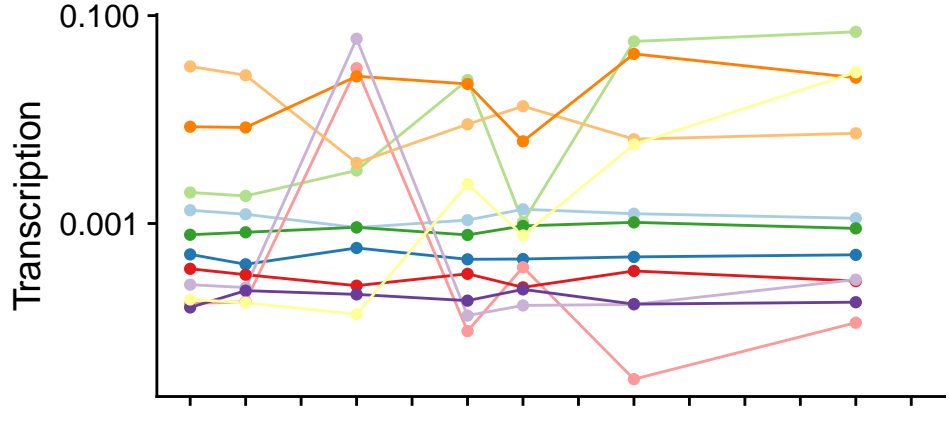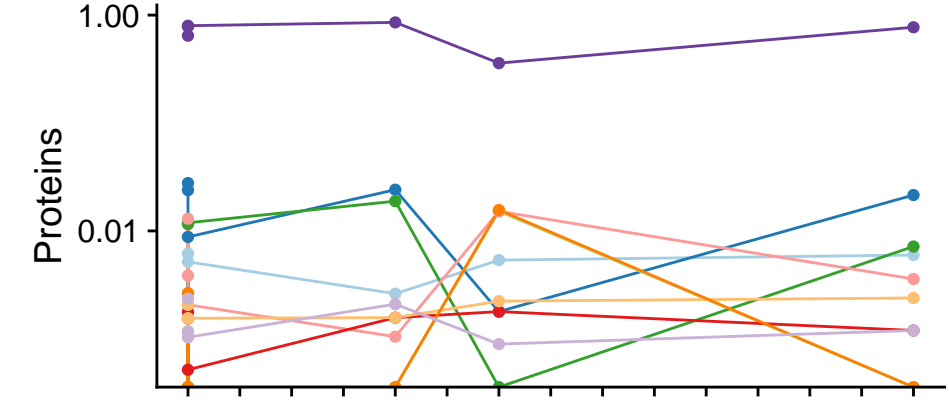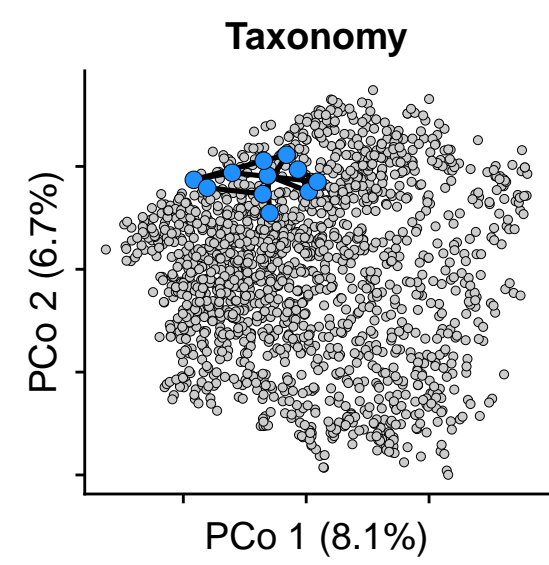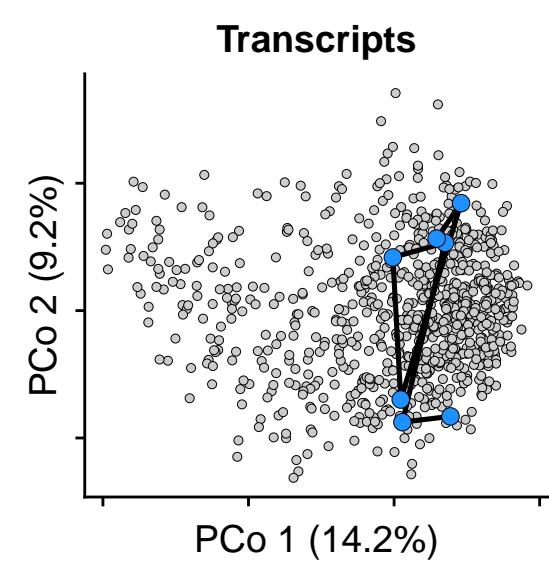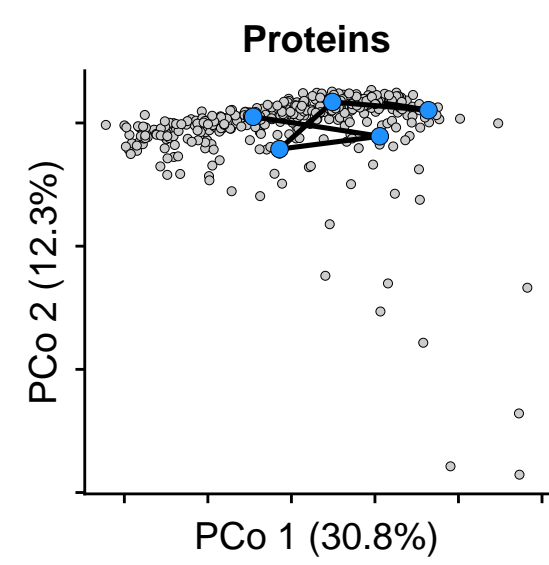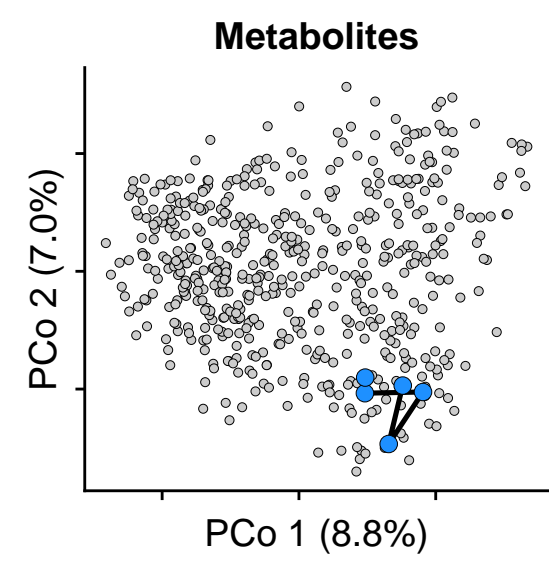

C3007: NA Female White Cedars–Sinai | CD

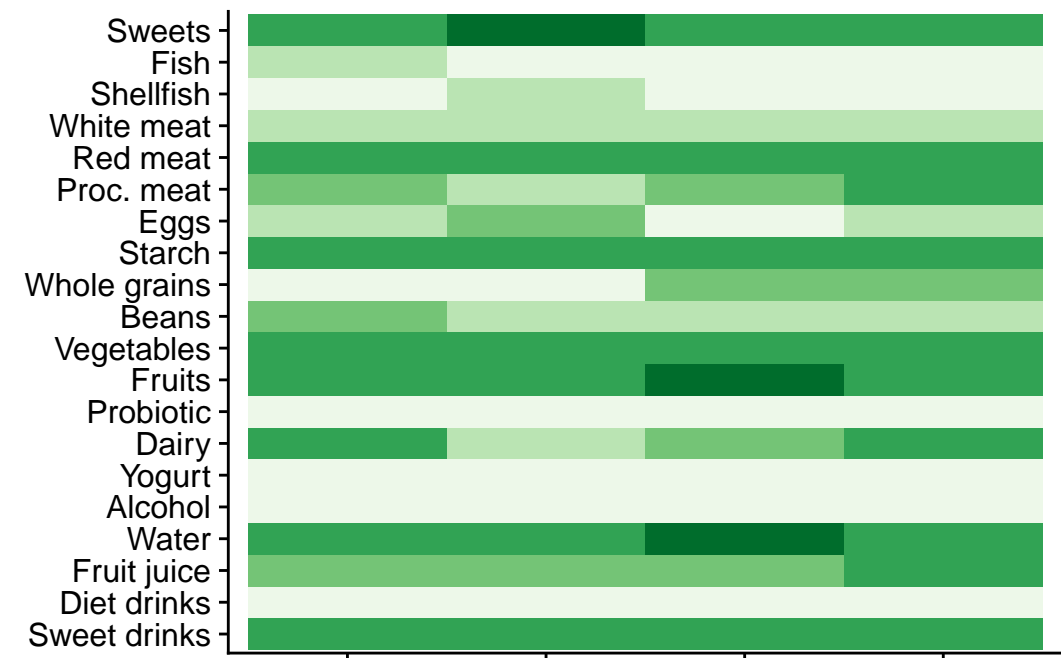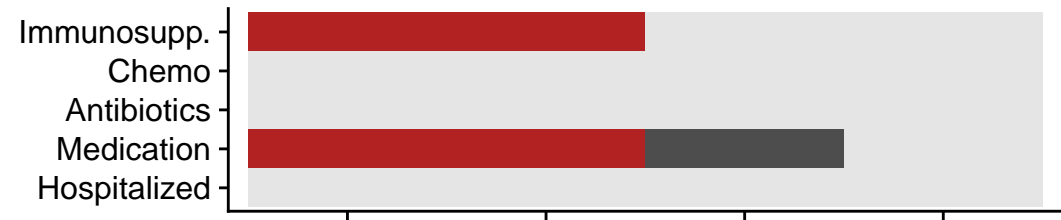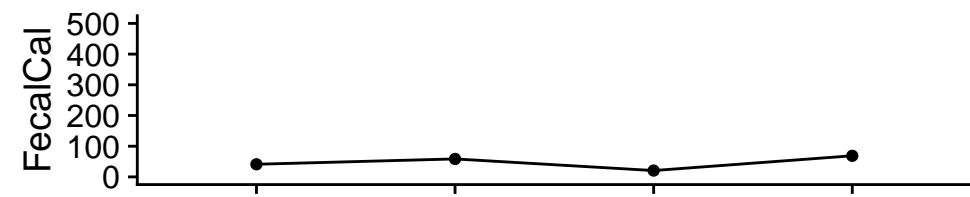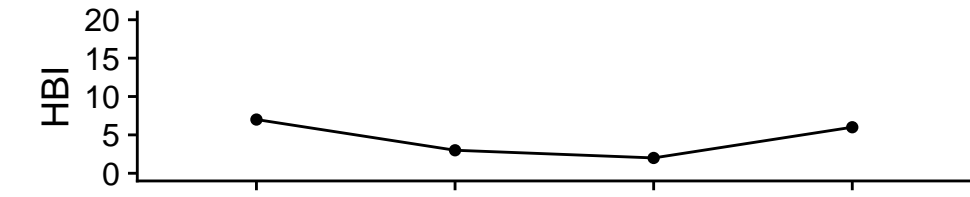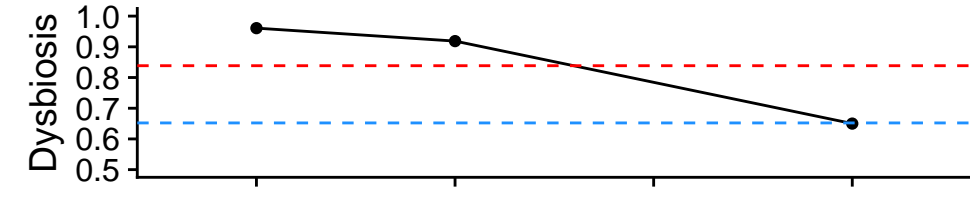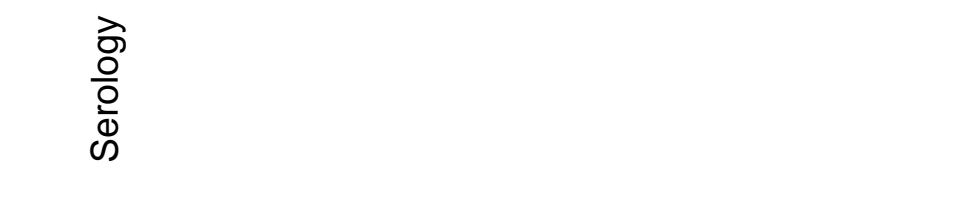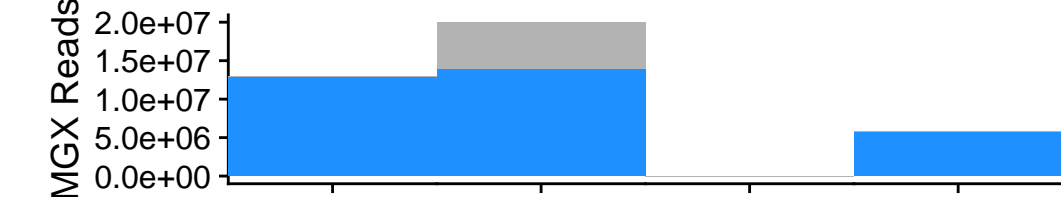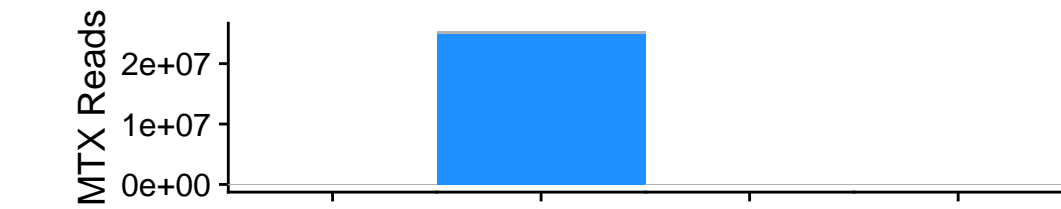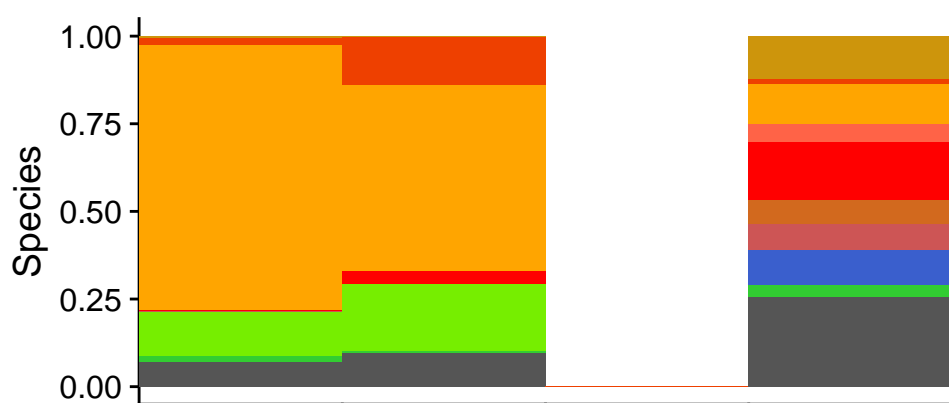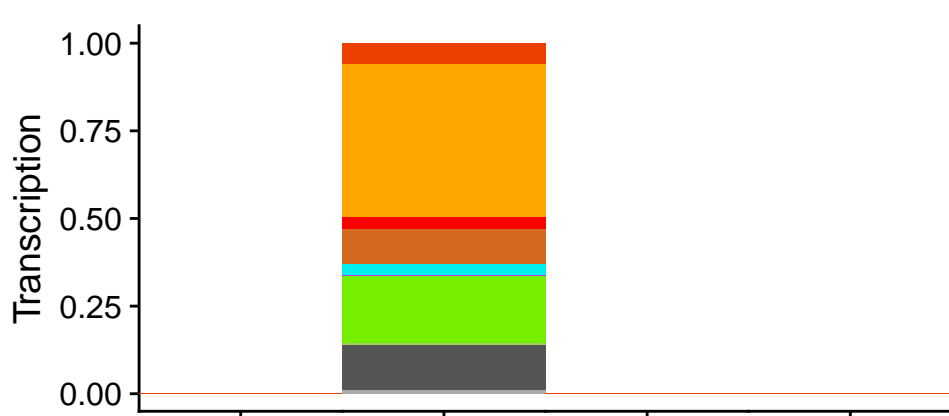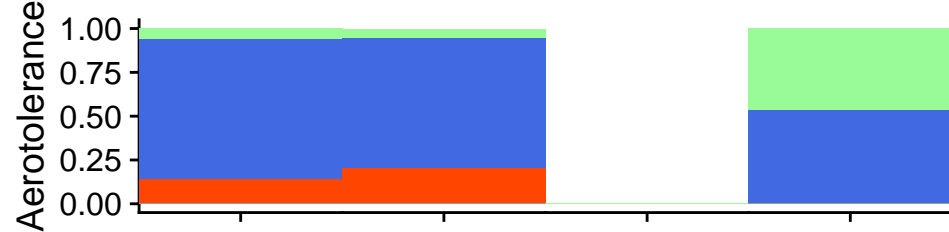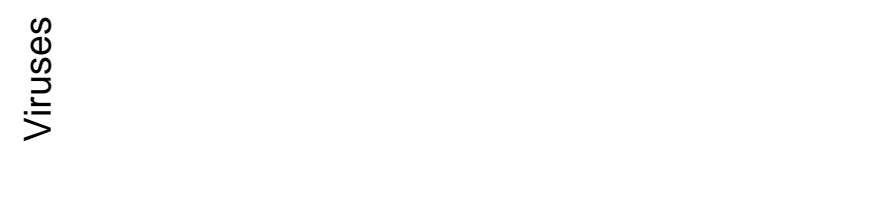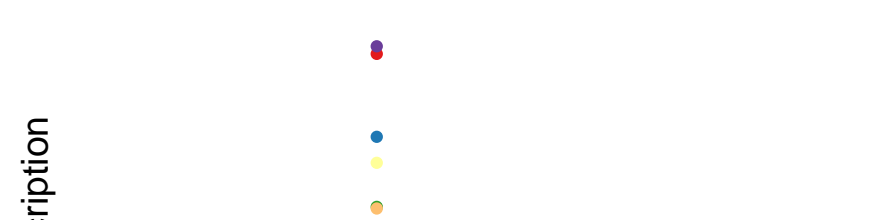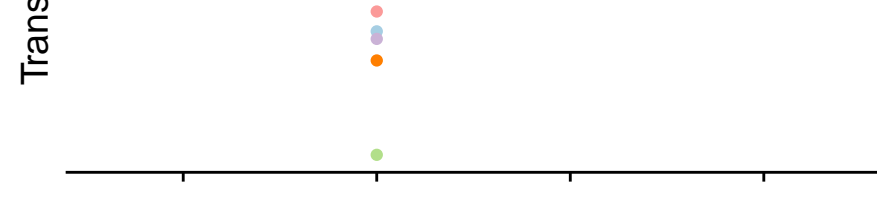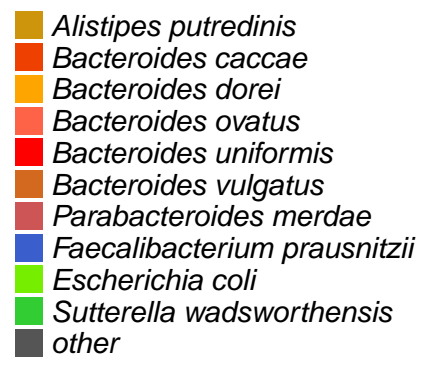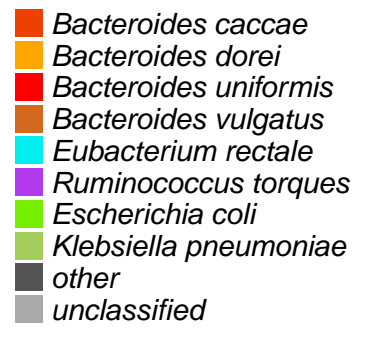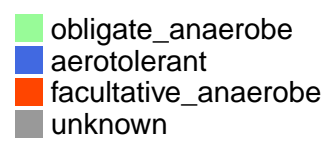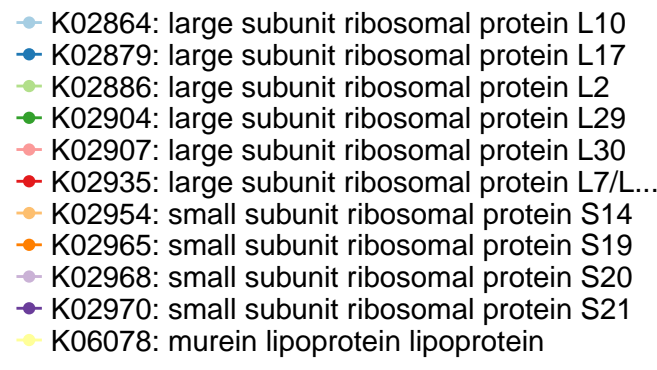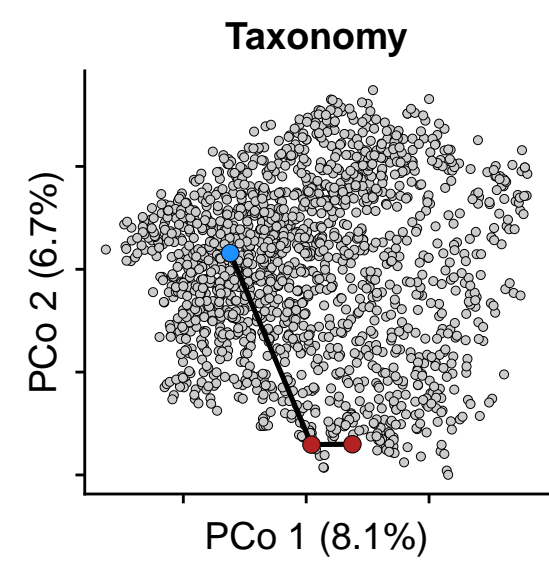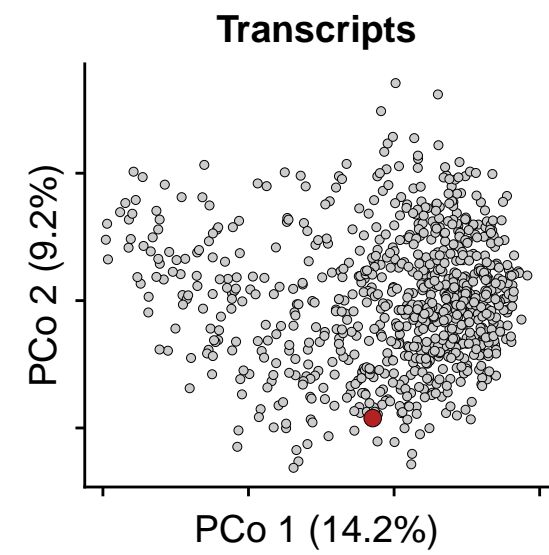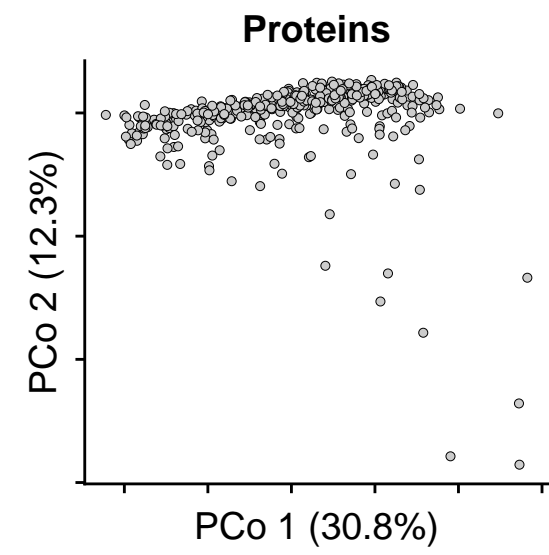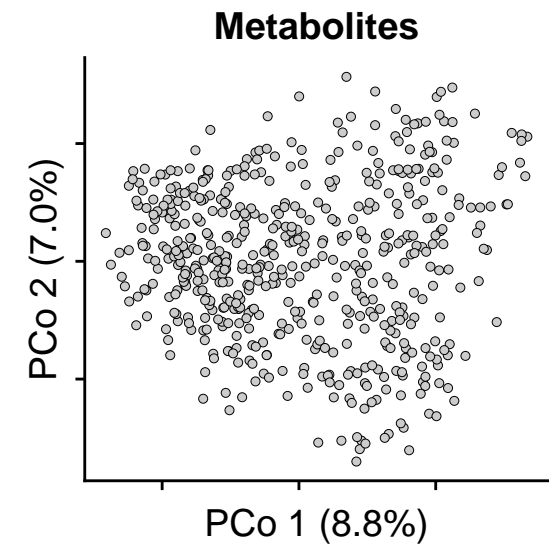



C3008: 53 Female White Cedars–Sinai | CD

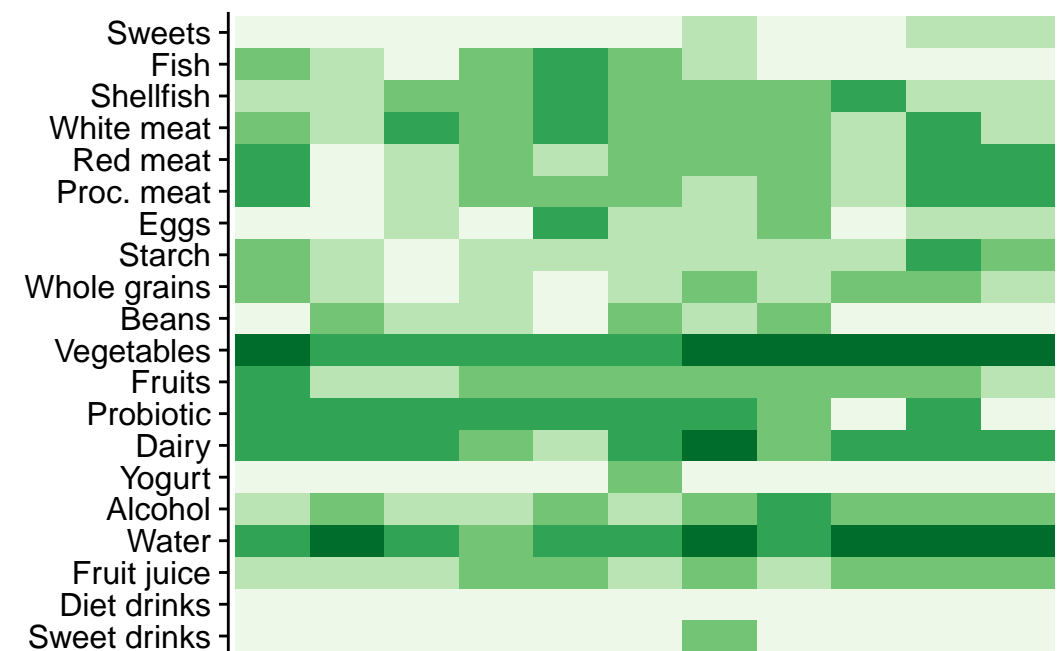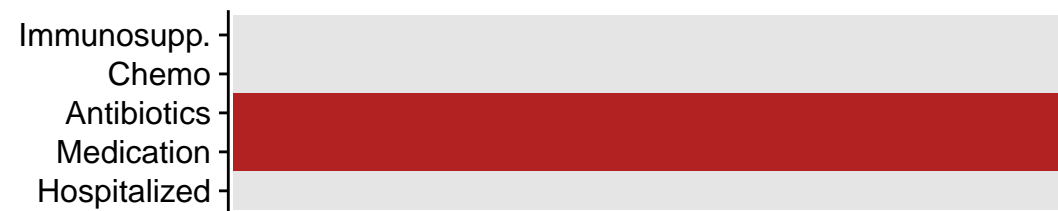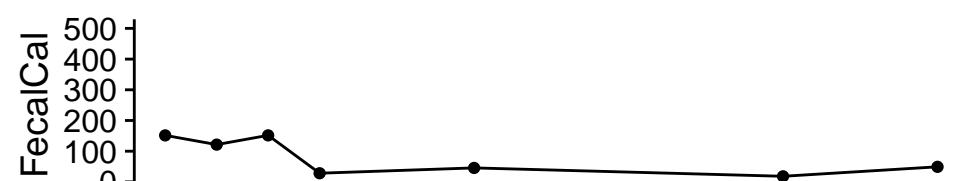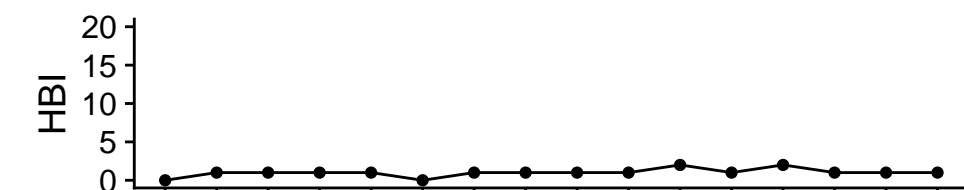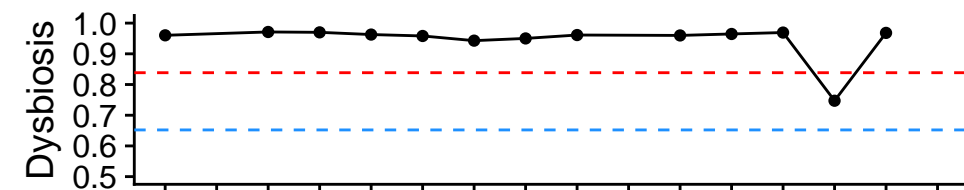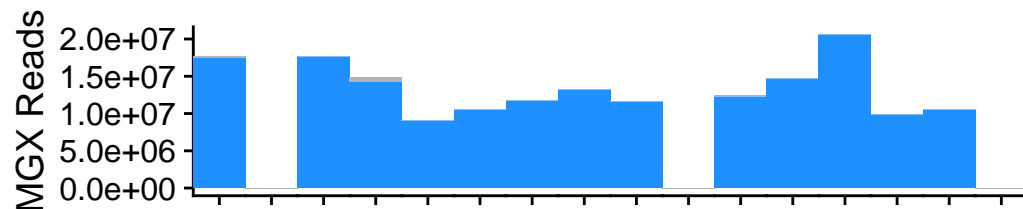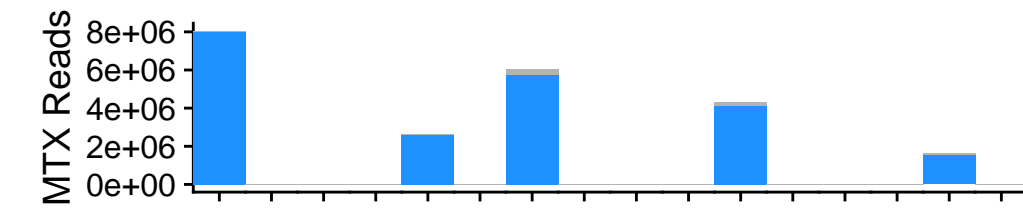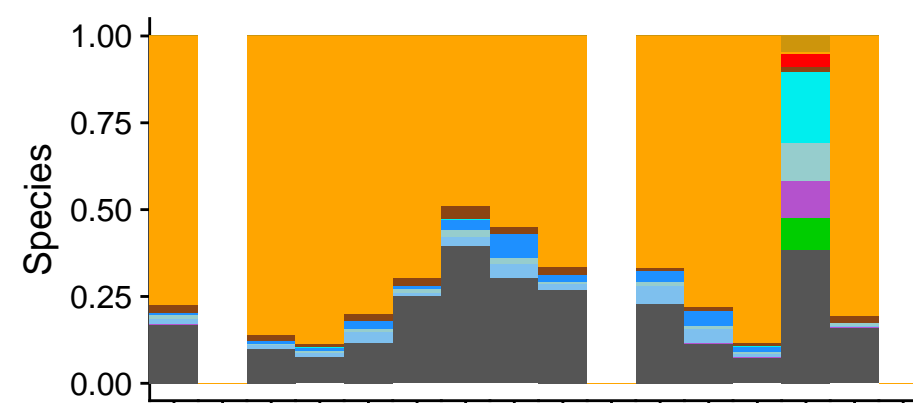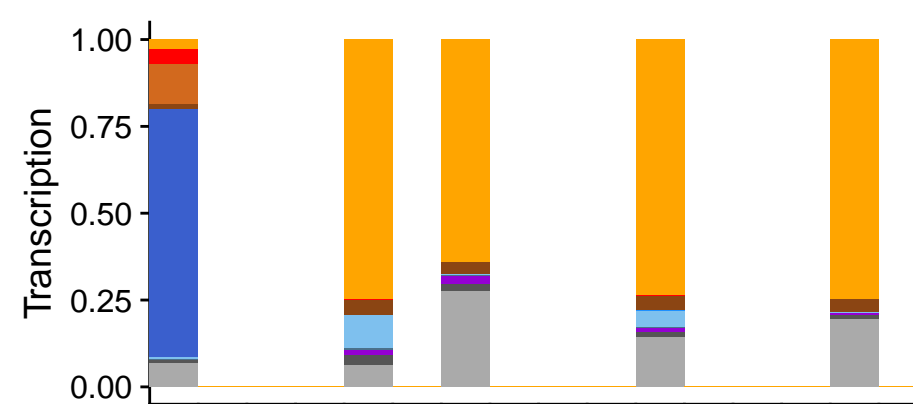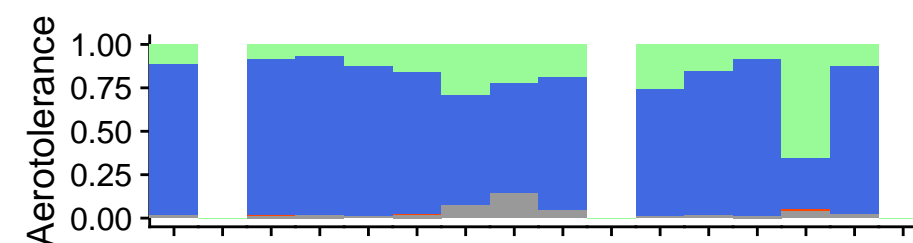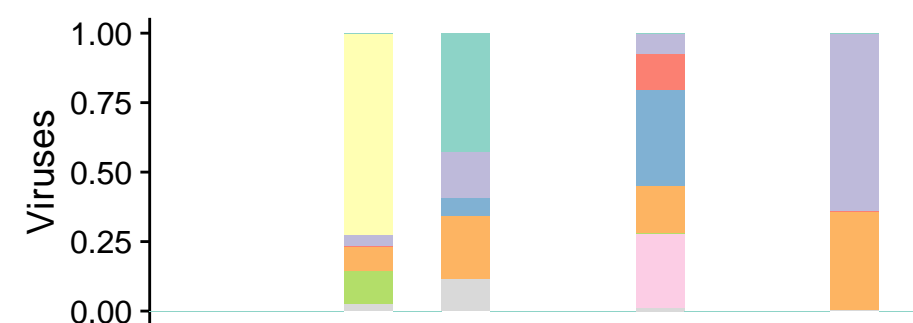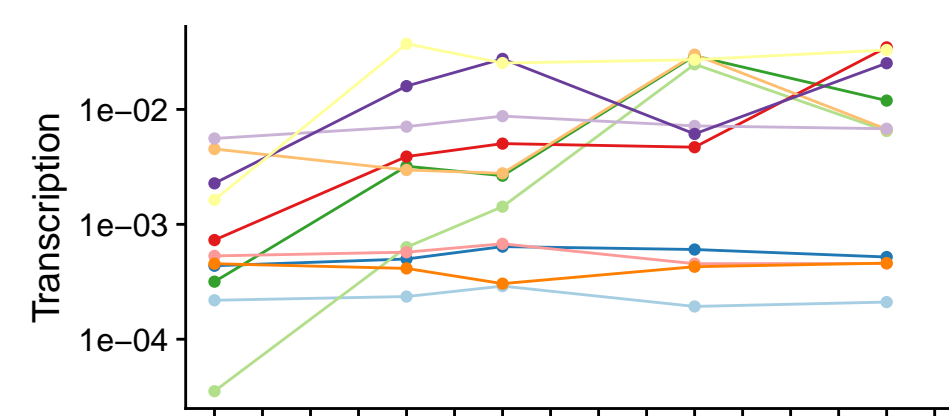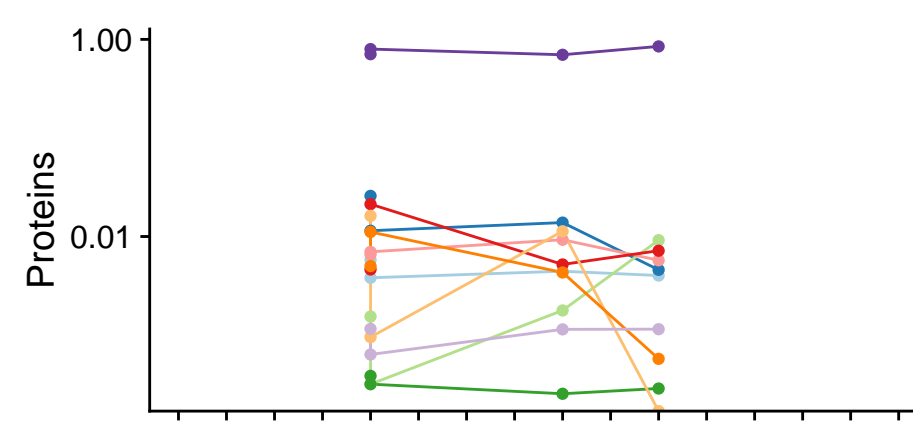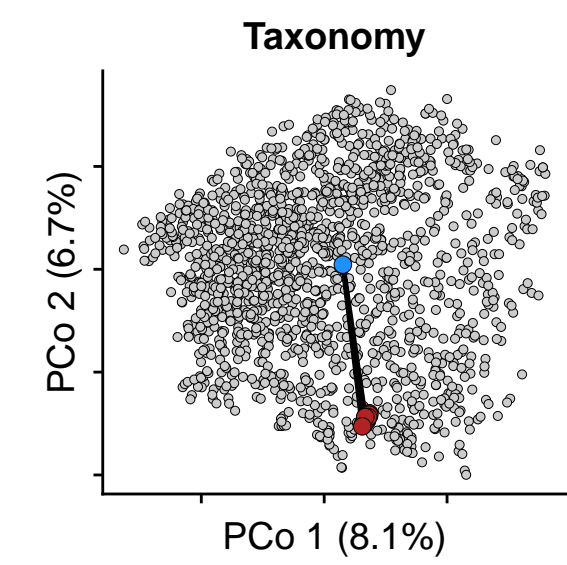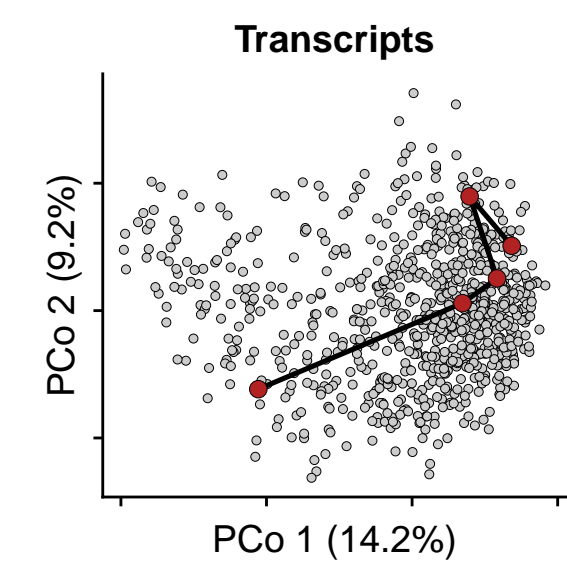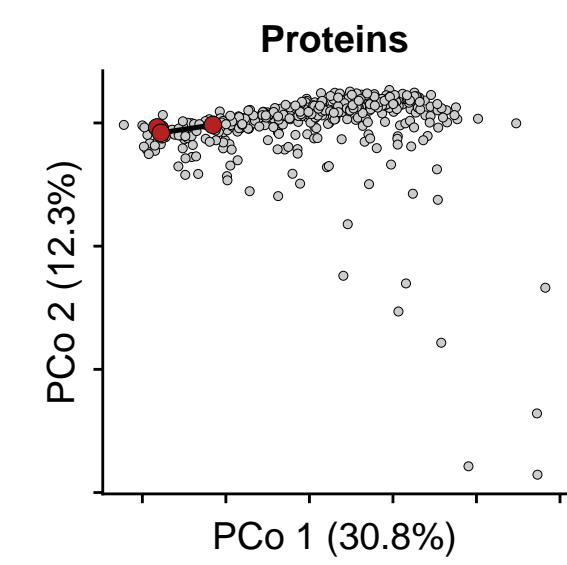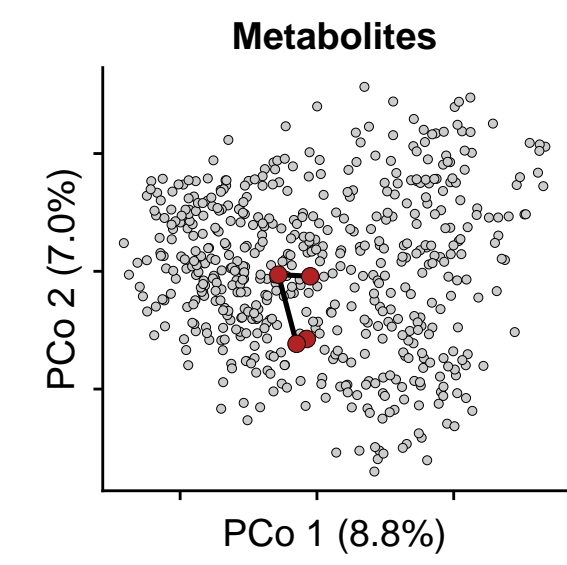

C3009: 56 Male White Cedars–Sinai | CD L3

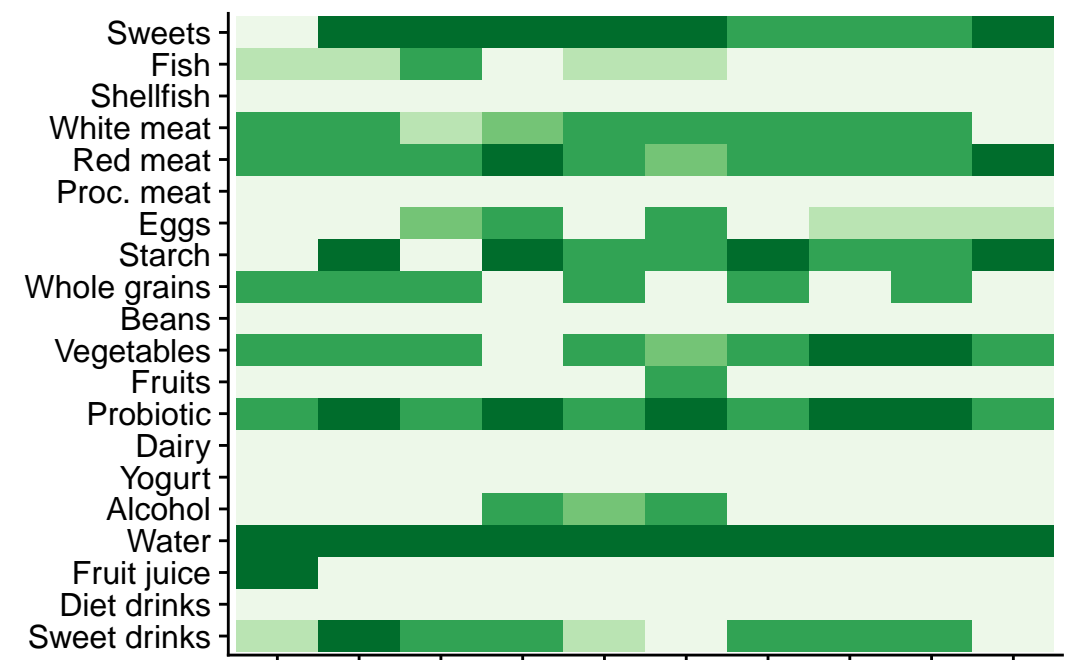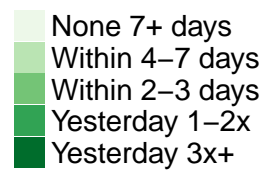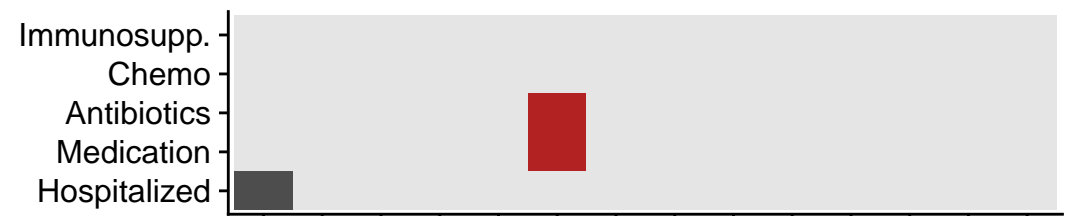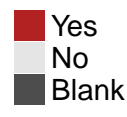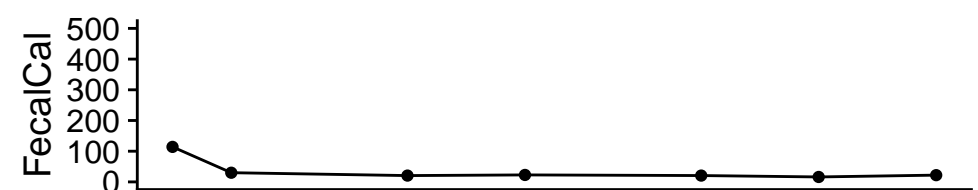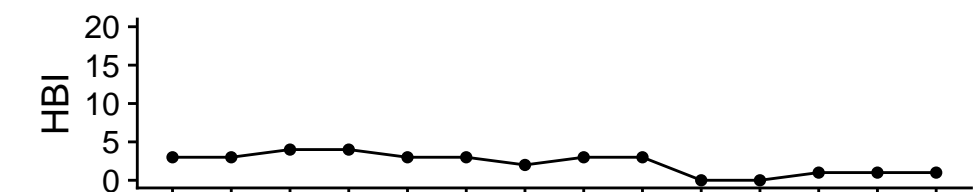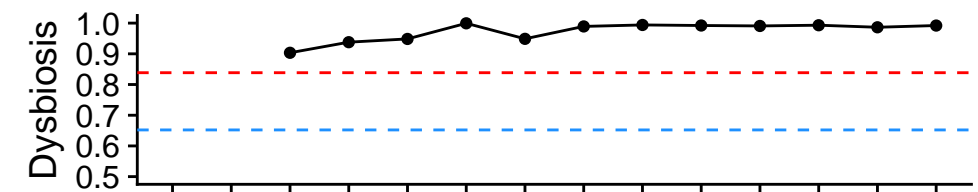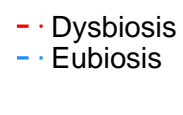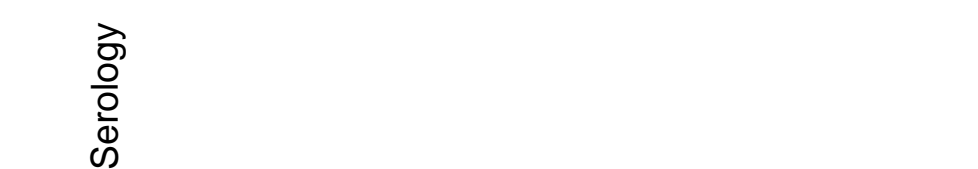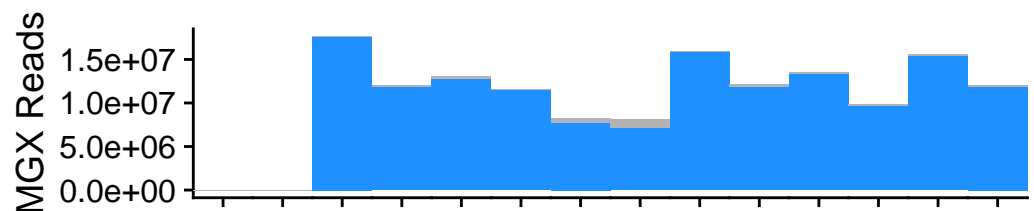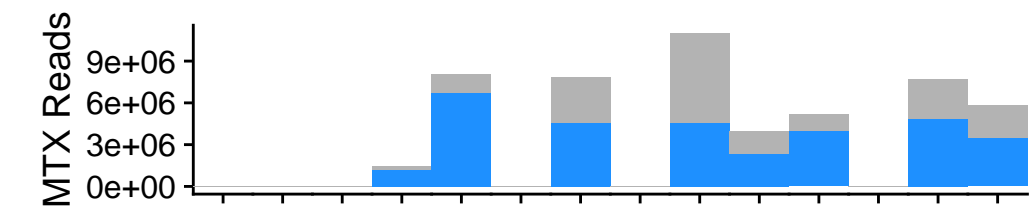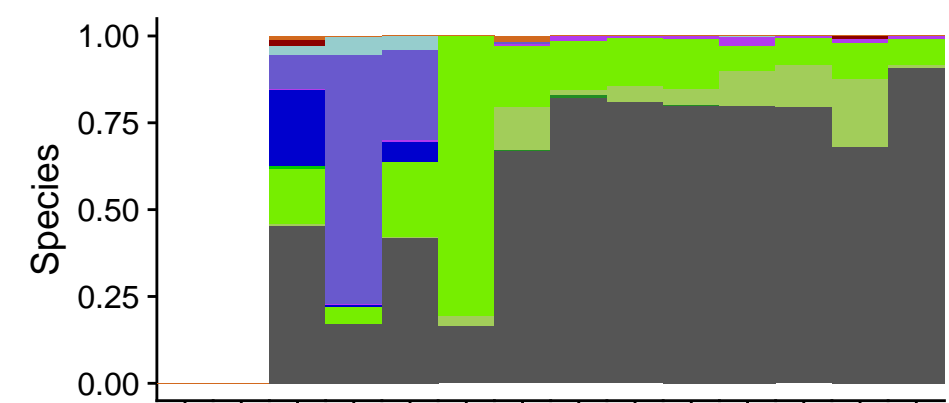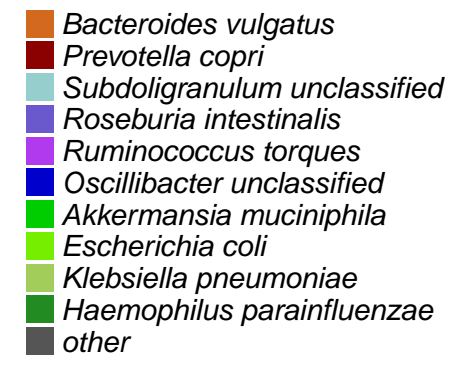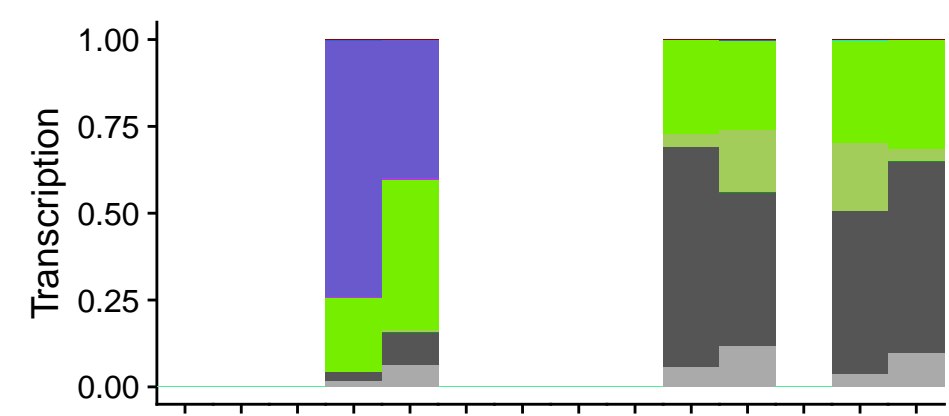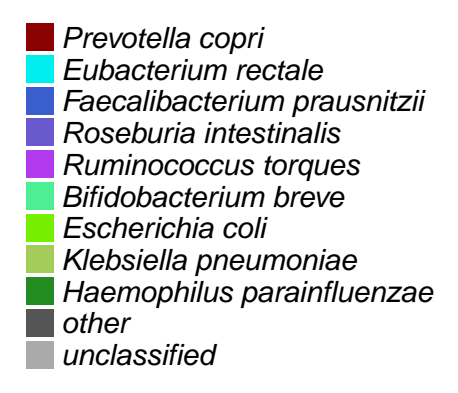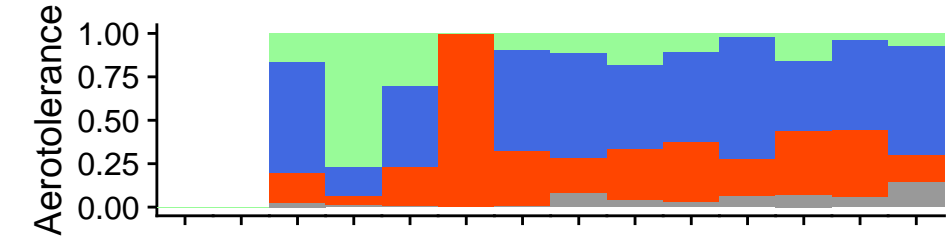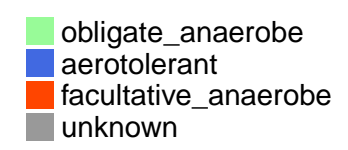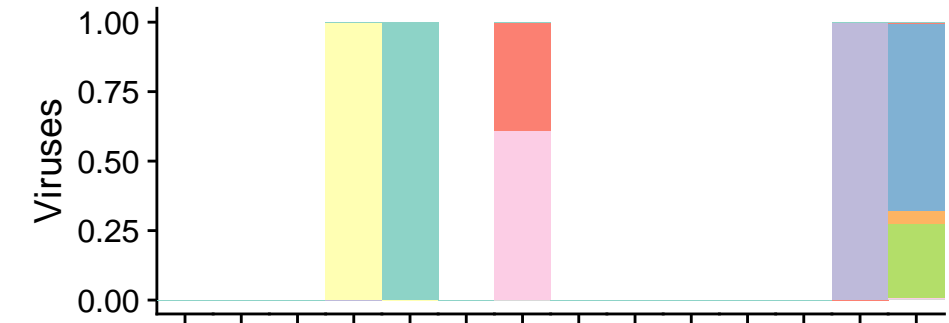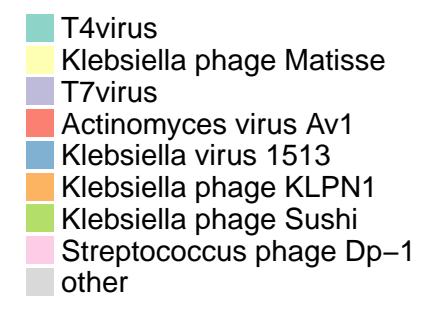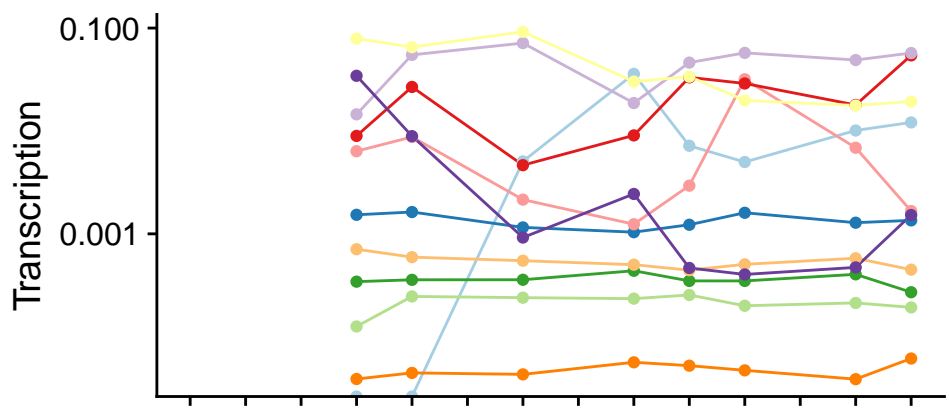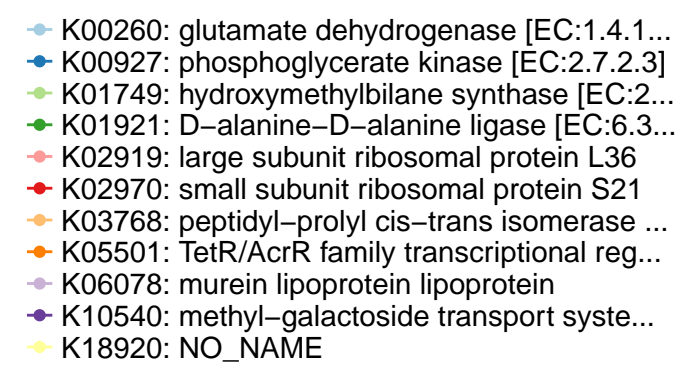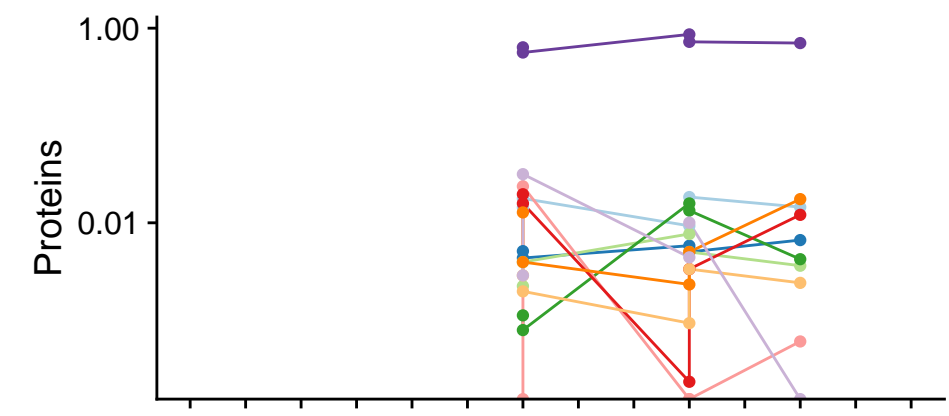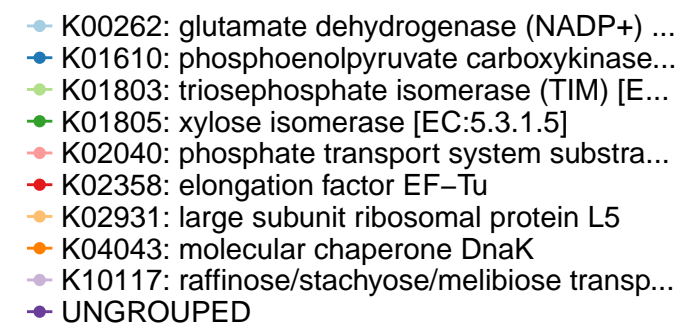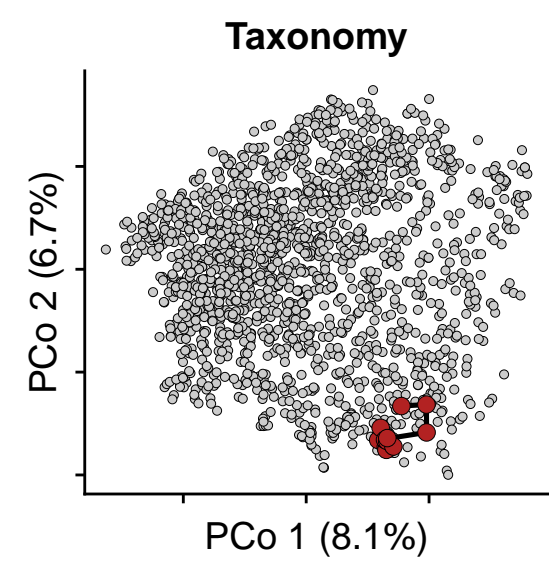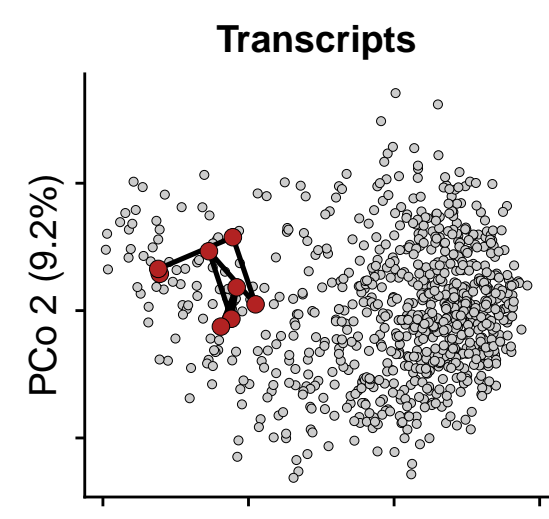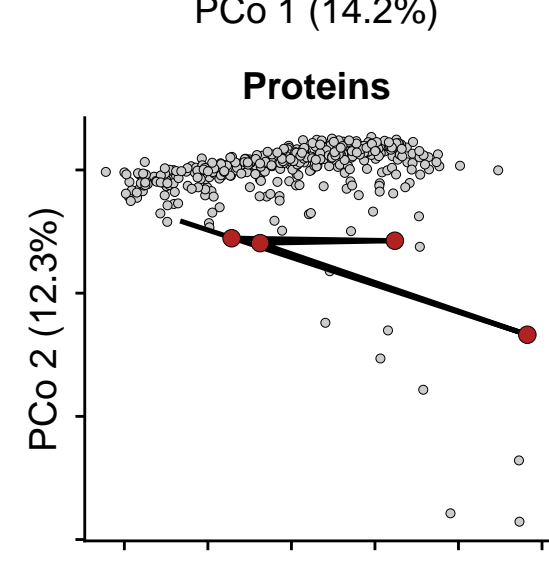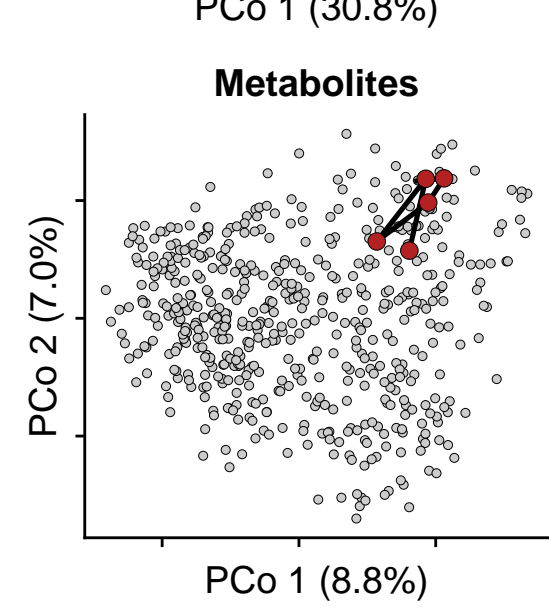

C3010: 51 Female White Cedars–Sinai | CD L3

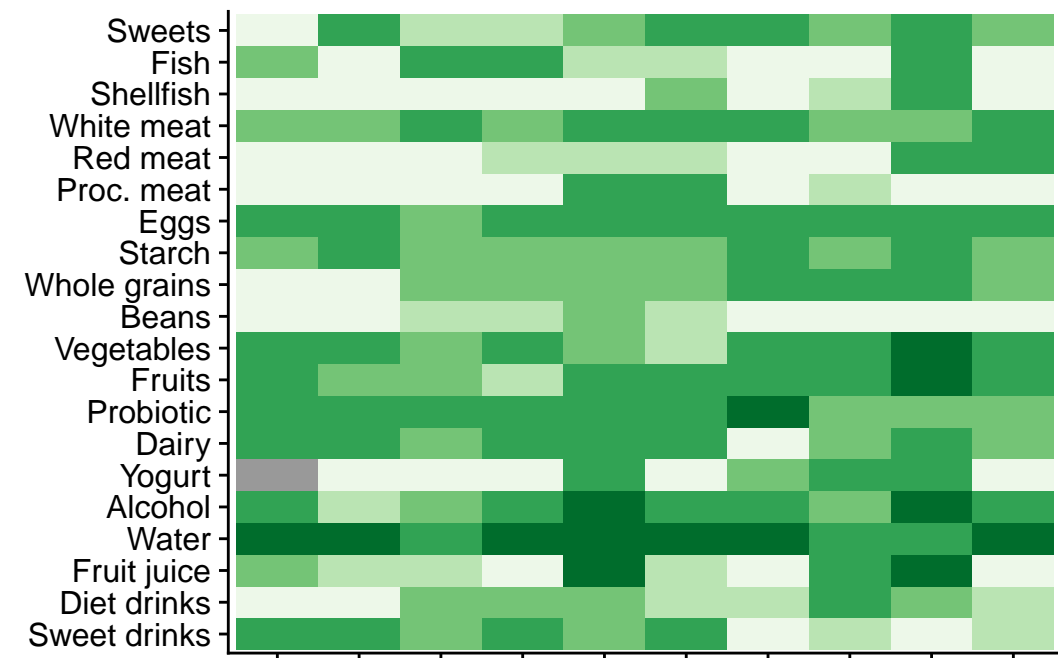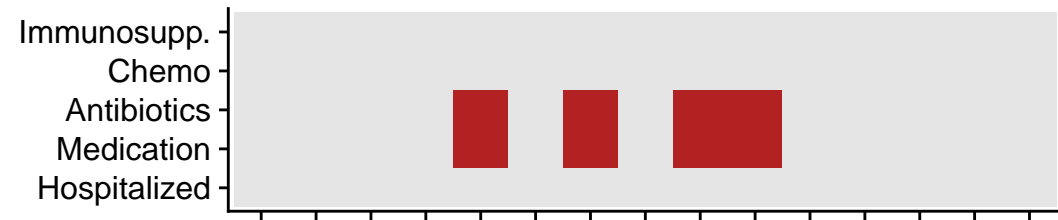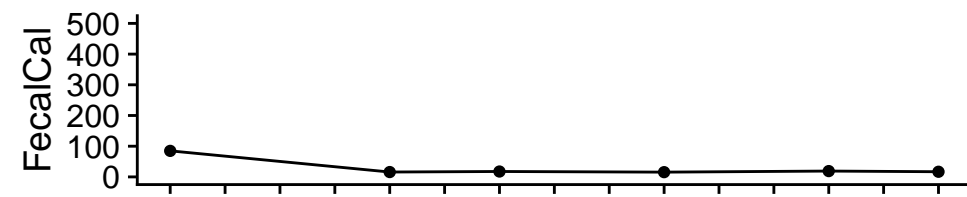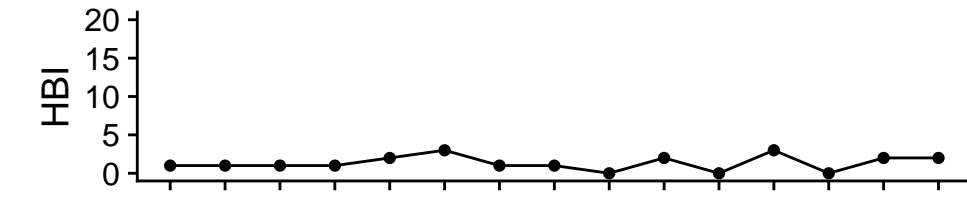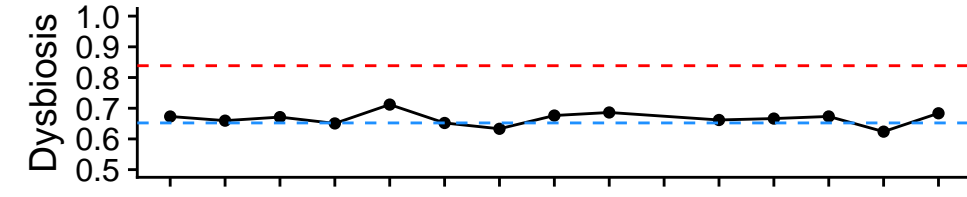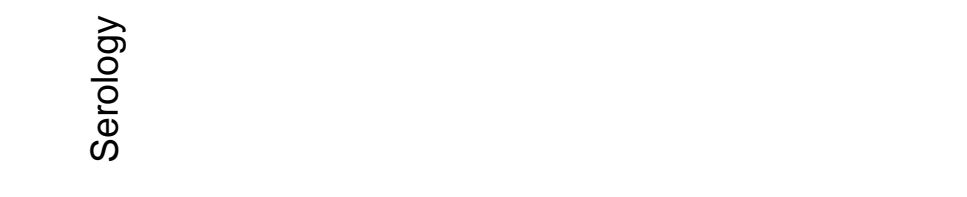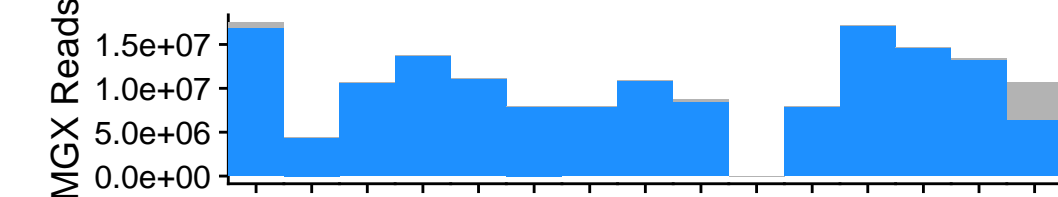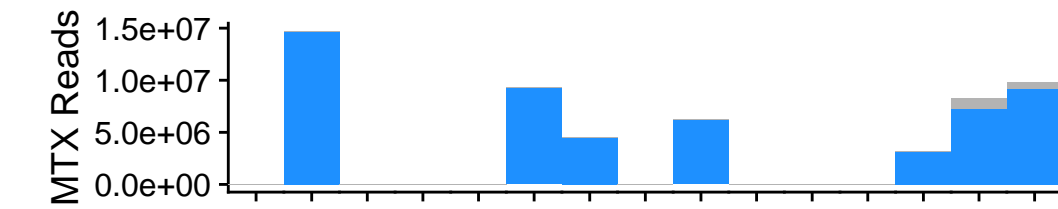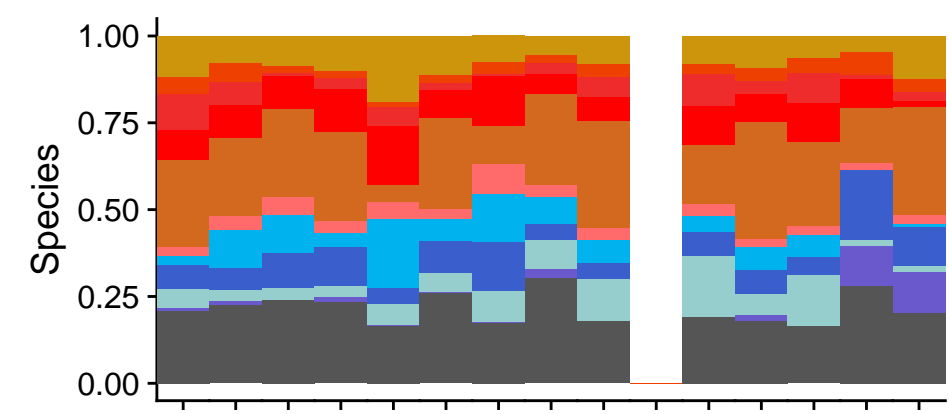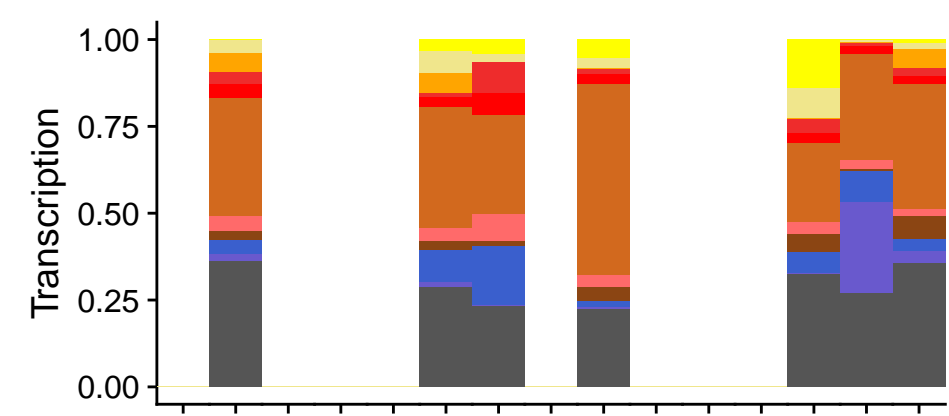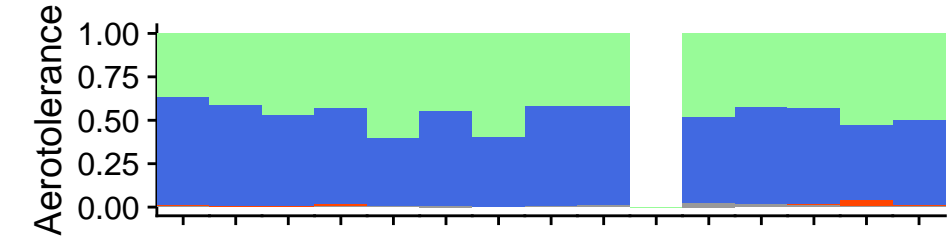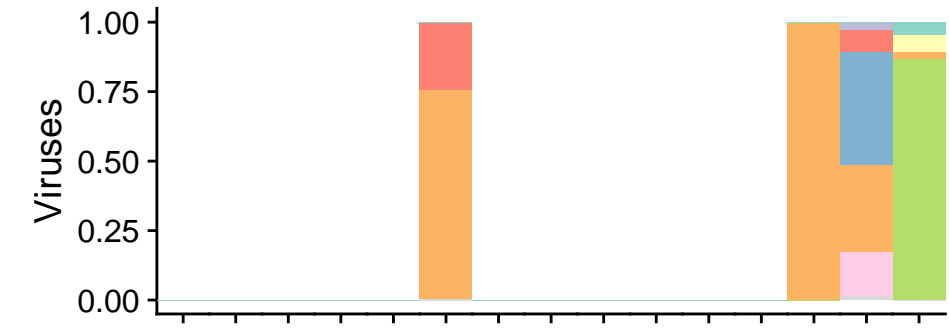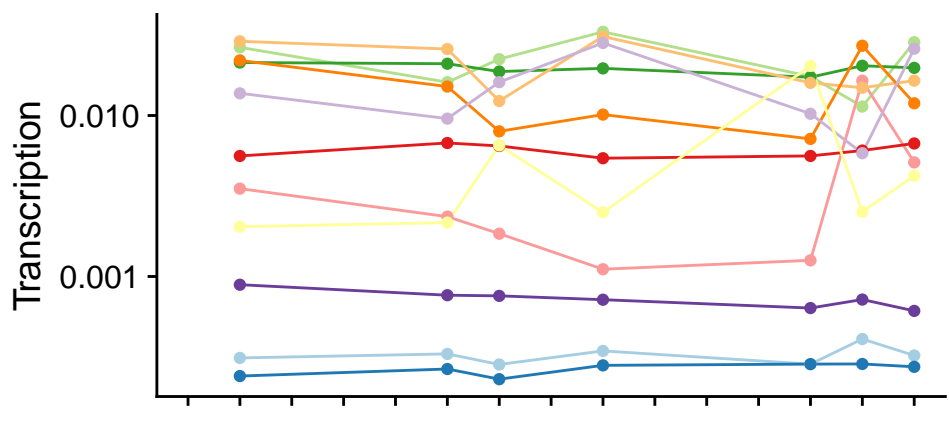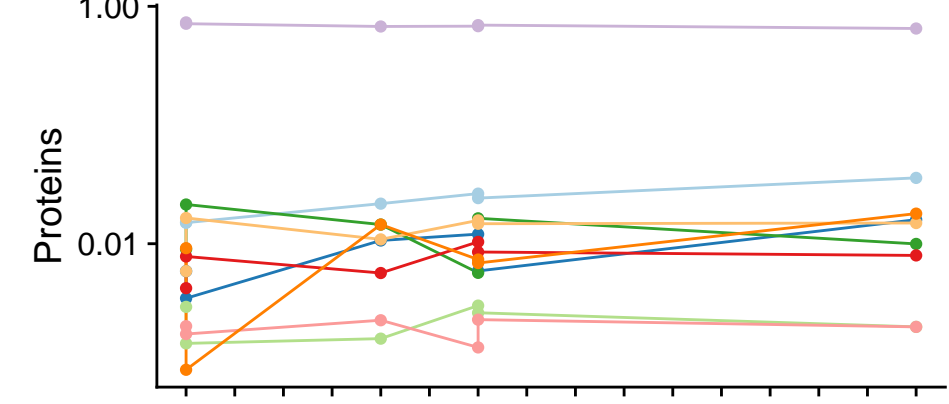

- Alistipes putredinis*
- Bacteroides caccae*
- Bacteroides thetaiotaomicron*
- Bacteroides uniformis*
- Bacteroides vulgatus*
- Parabacteroides distasonis*
- Eubacterium siraeum*
- Faecalibacterium prausnitzii*
- Subdoligranulum unclassified*
- Roseburia intestinalis*
- other

- Alistipes shahii*
- Alistipes finegoldii*
- Bacteroides dorei*
- Bacteroides thetaiotaomicron*
- Bacteroides uniformis*
- Bacteroides vulgatus*
- Parabacteroides distasonis*
- Odoribacter splanchnicus*
- Faecalibacterium prausnitzii*
- Roseburia intestinalis*
- other

- obligate\_anaerobe
- aerotolerant
- facultative\_anaerobe
- unknown

- Pseudomonas phage Phi-S1*
- Pseudomonas phage PPpW-4*
- Leuconostoc phage phiLNTR3*
- unclassified Siphoviridae
- Apis mellifera filamentous virus*
- Gokushovirus WZ-2015a*
- Blueberry shock virus*
- Pepper mild mottle virus*
- other

- K00950: 2-amino-4-hydroxy-6-hydroxymet...
- K01945: phosphoribosylamine--glycine ligas...
- K02078: acyl carrier protein
- K02358: elongation factor EF-Tu
- K02406: flagellin
- K02961: small subunit ribosomal protein S17
- K02968: small subunit ribosomal protein S20
- K02970: small subunit ribosomal protein S21
- K03530: DNA-binding protein HU-beta
- K03979: GTP-binding protein
- K19157: NO\_NAME

- K00262: glutamate dehydrogenase (NADP+) ...
- K01006: pyruvate, orthophosphate dikinase [...]
- K02357: elongation factor EF-Ts
- K02358: elongation factor EF-Tu
- K03040: DNA-directed RNA polymerase sub...
- K04043: molecular chaperone DnaK
- K04077: chaperonin GroEL
- K10117: raffinose/stachyose/melibiose transp...
- UNGROUPED

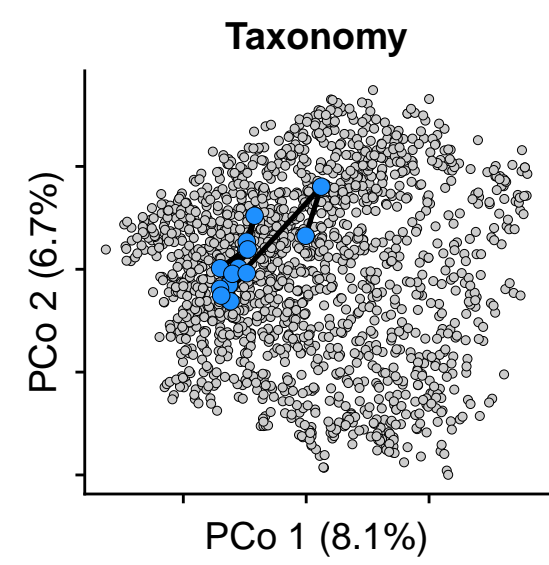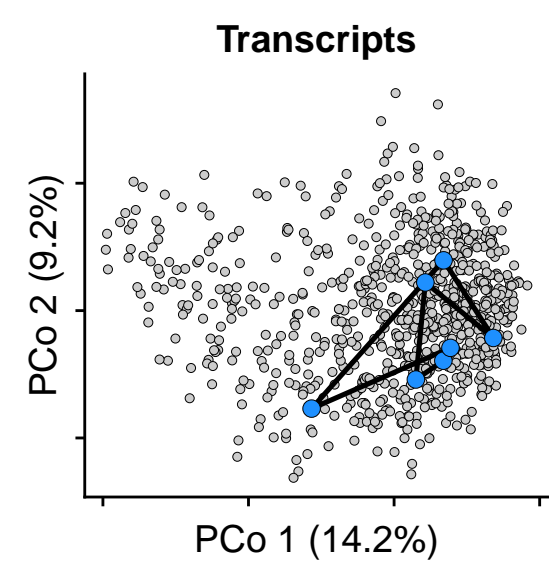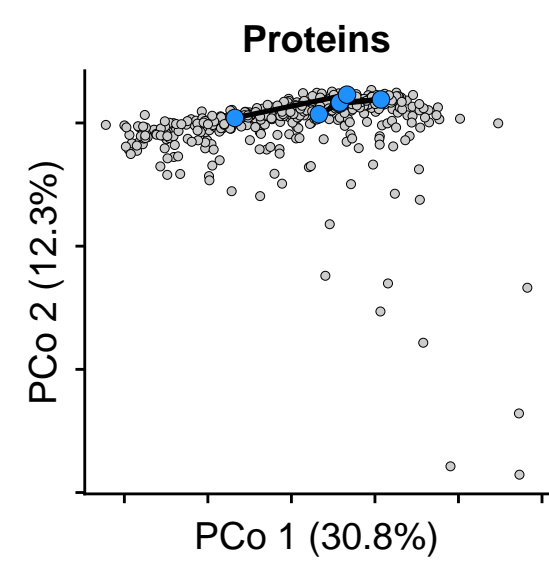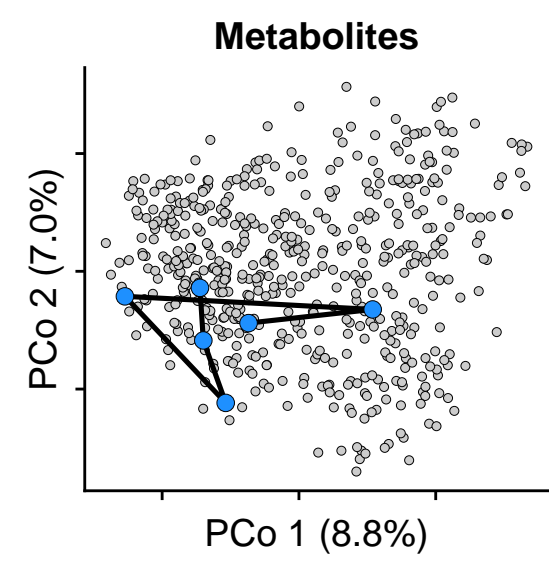

C3011: 37 Female White Cedars–Sinai | UC

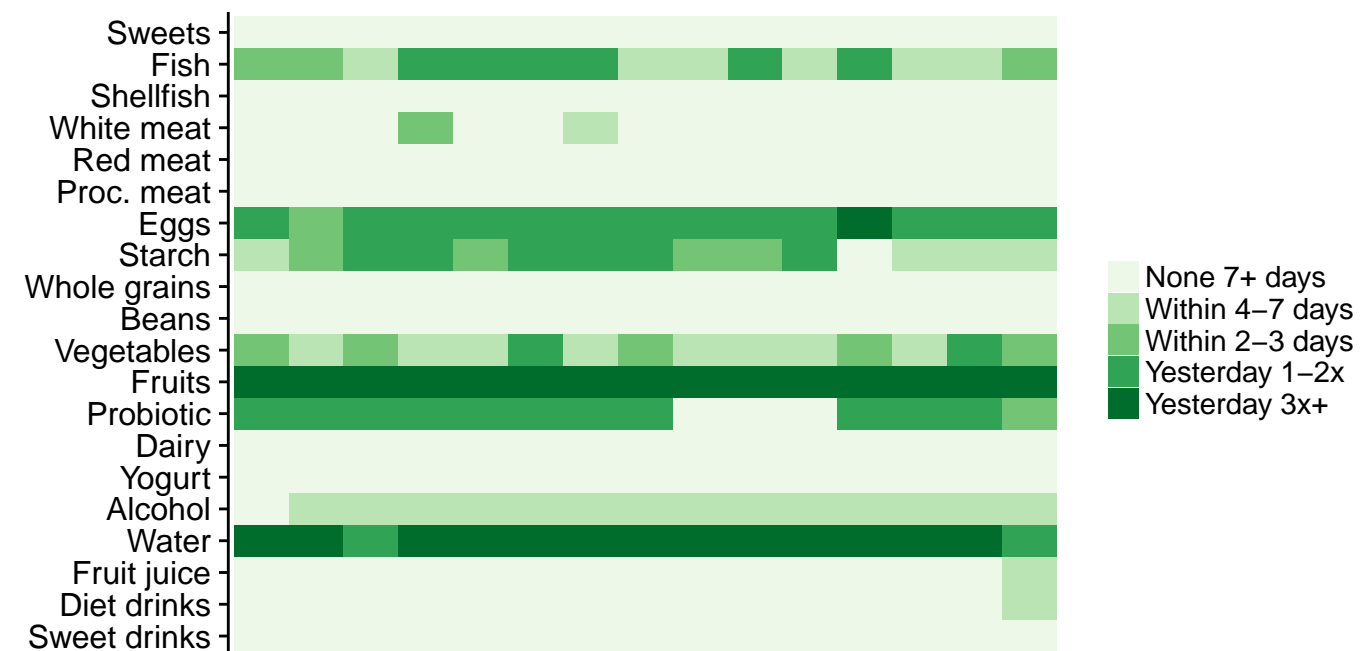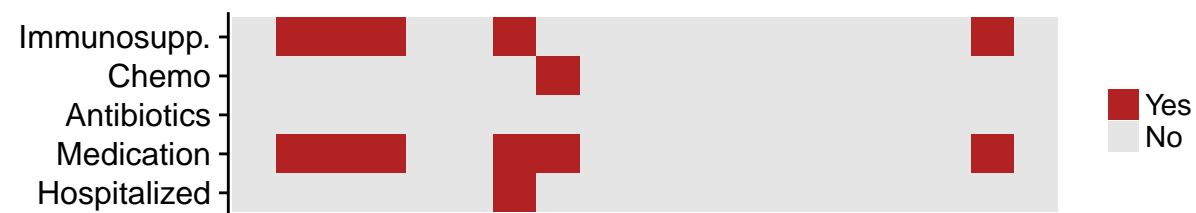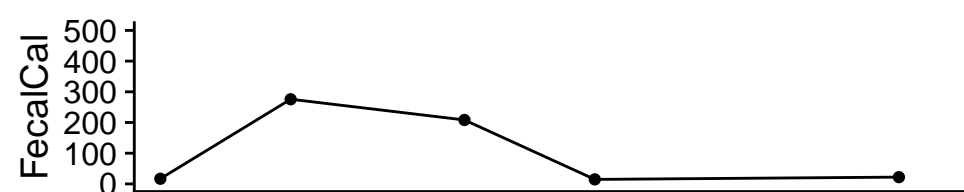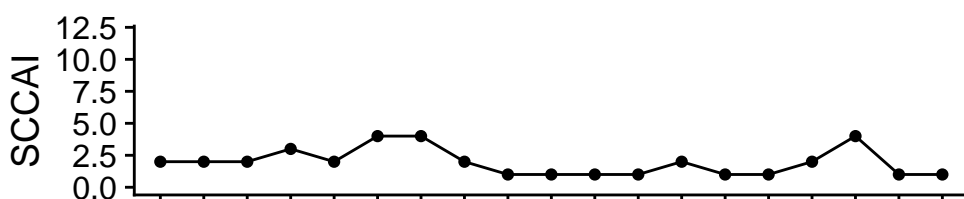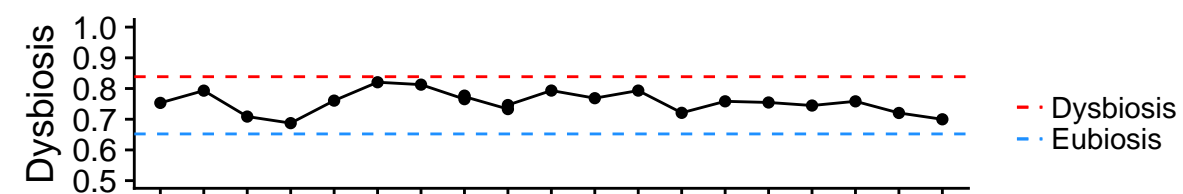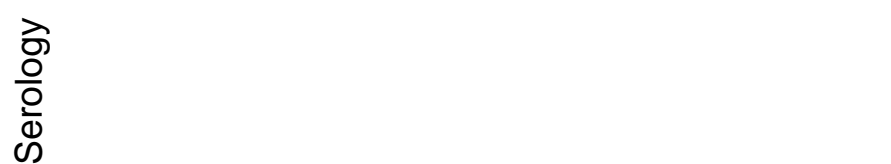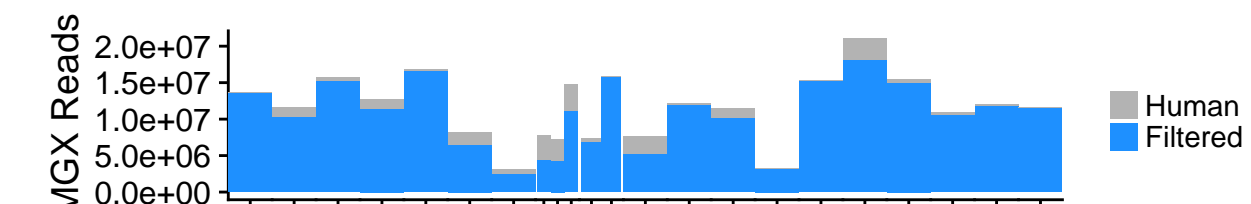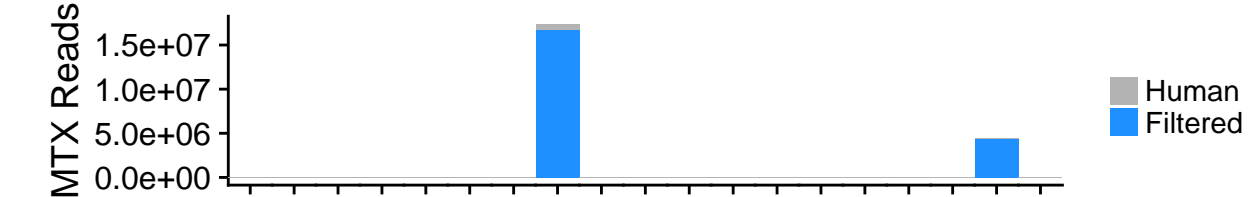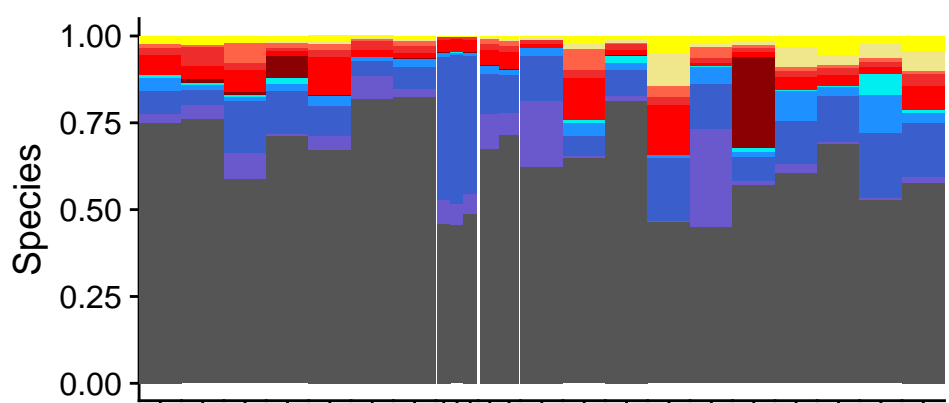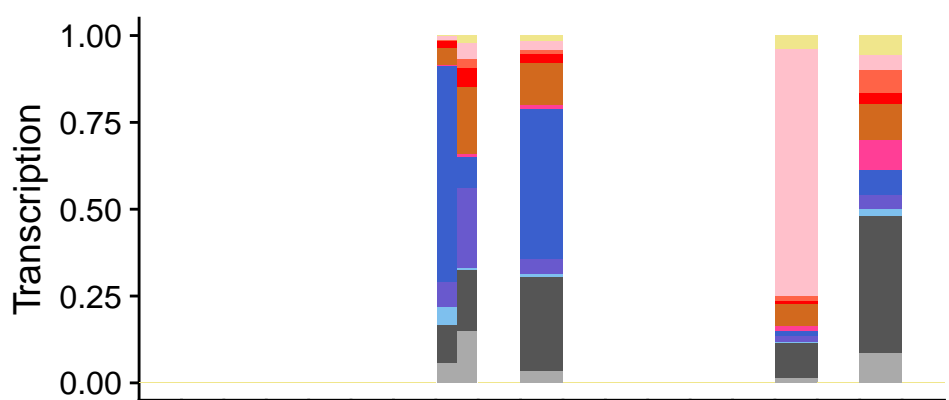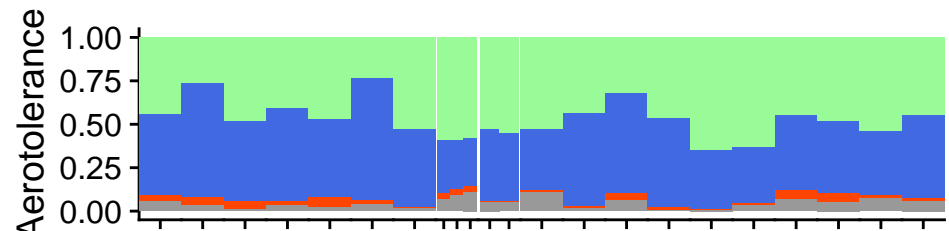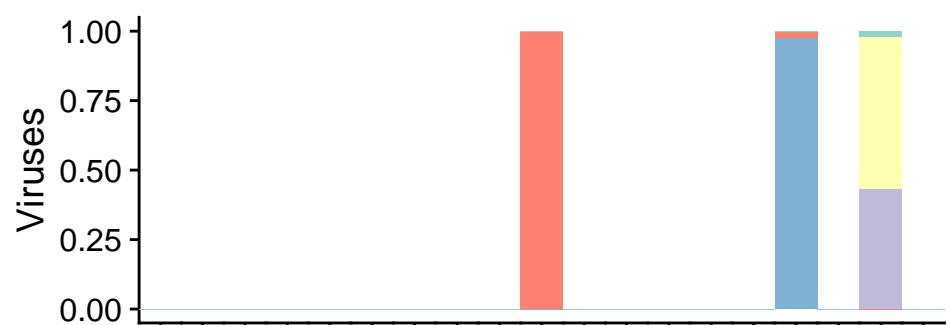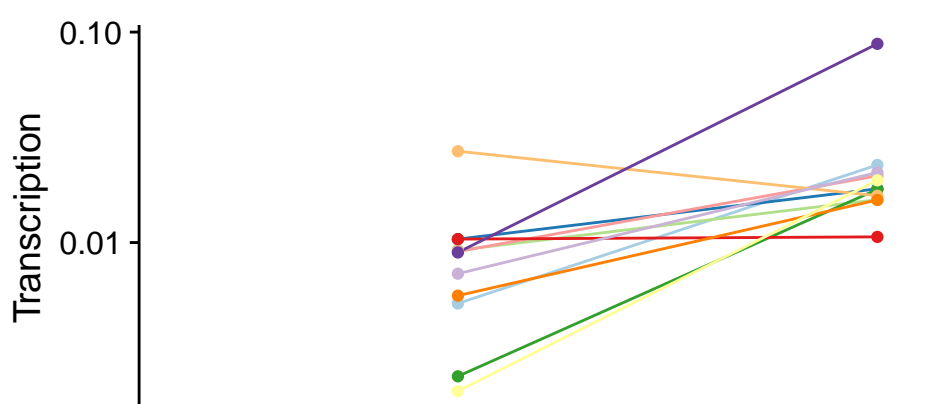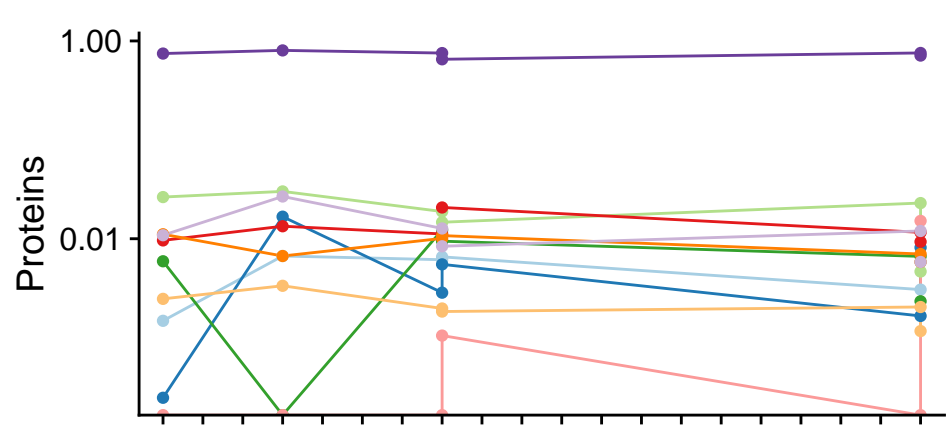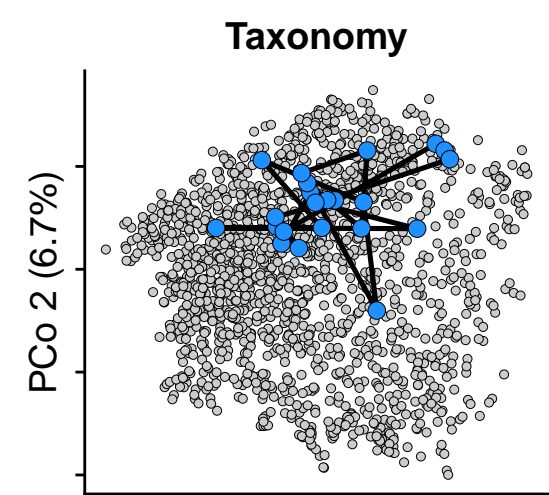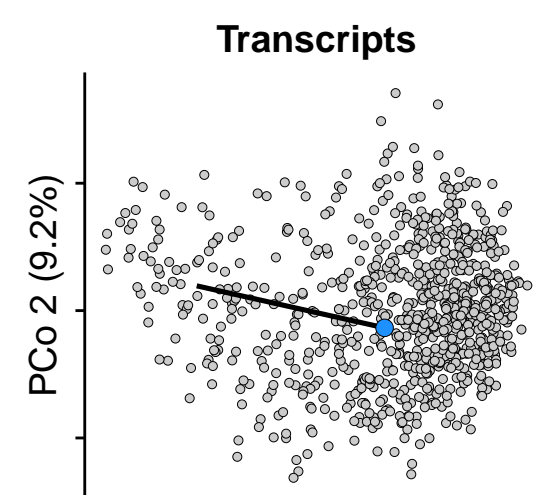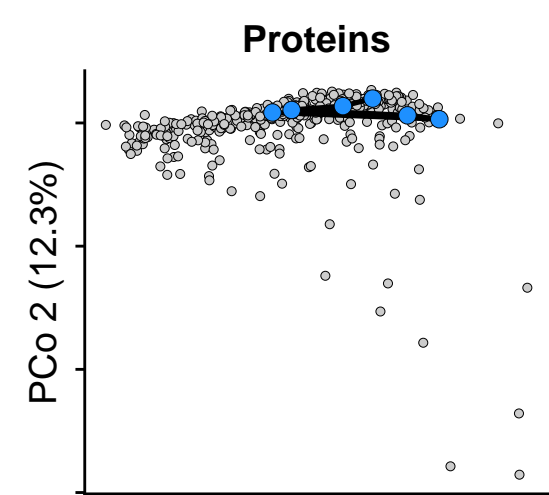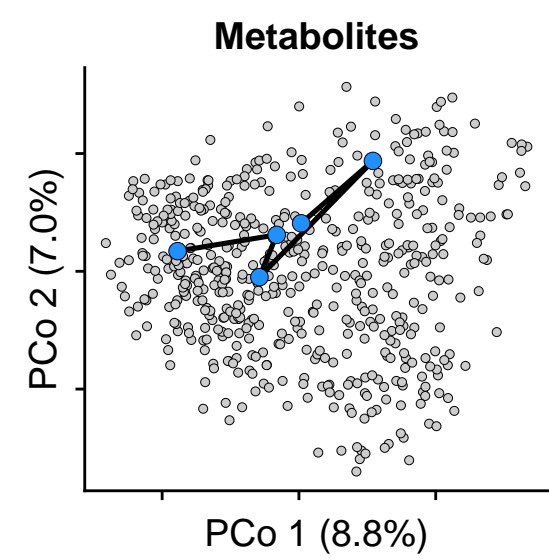

C3012: 37 Female White Cedars–Sinai | CD L1

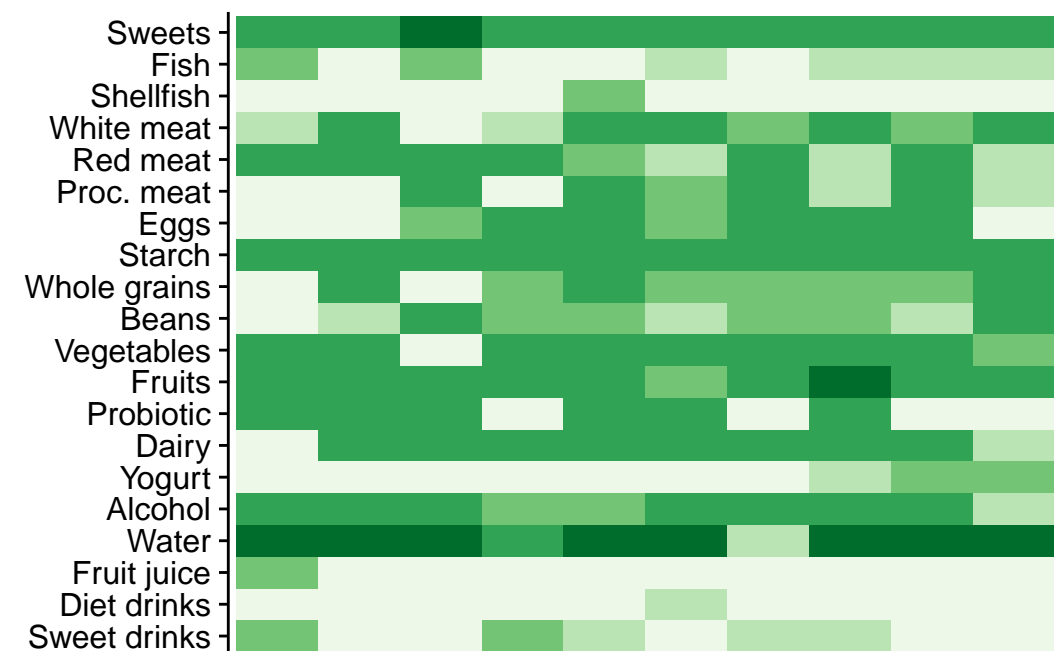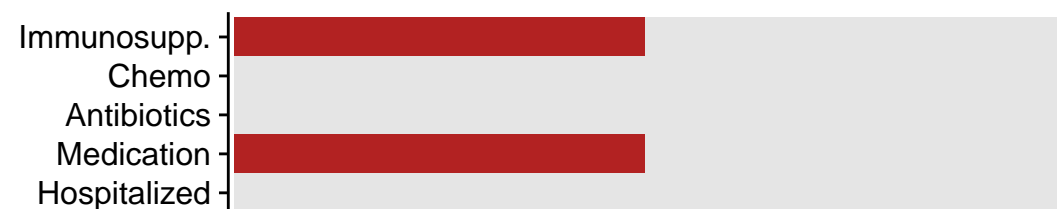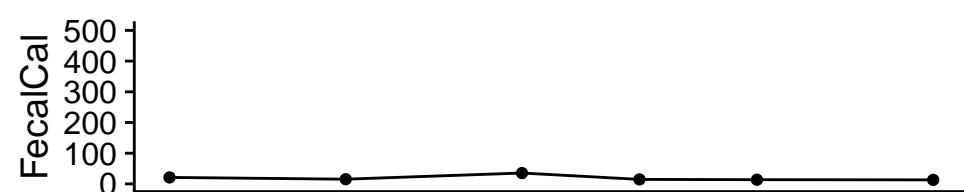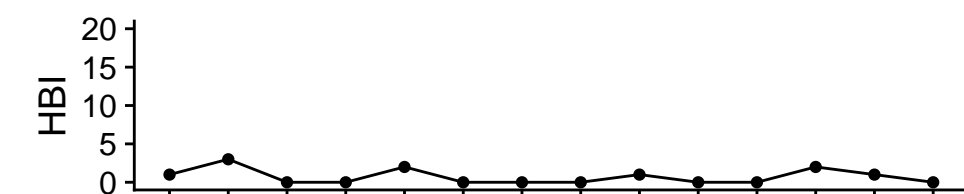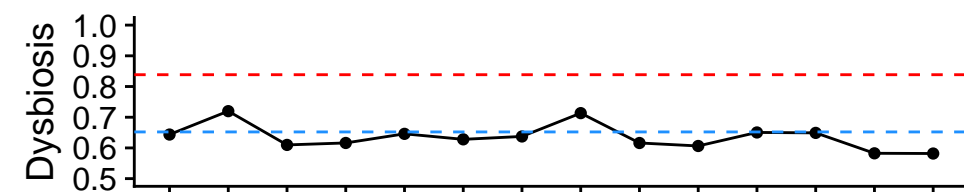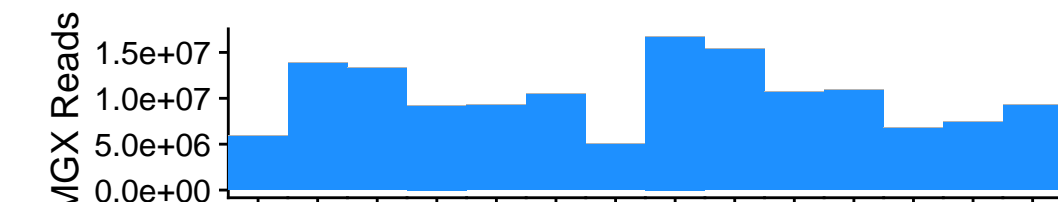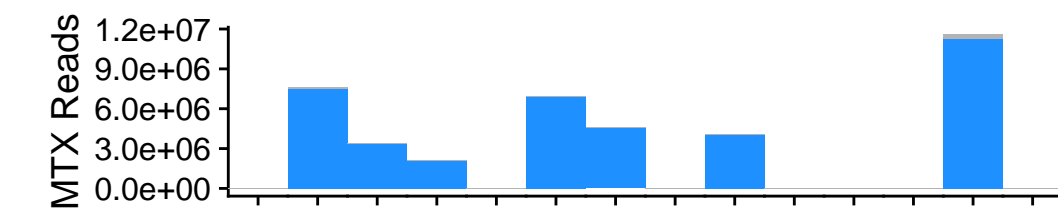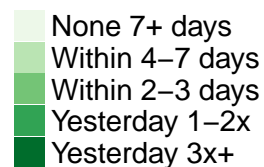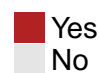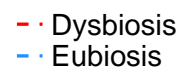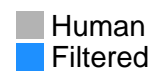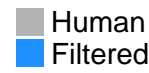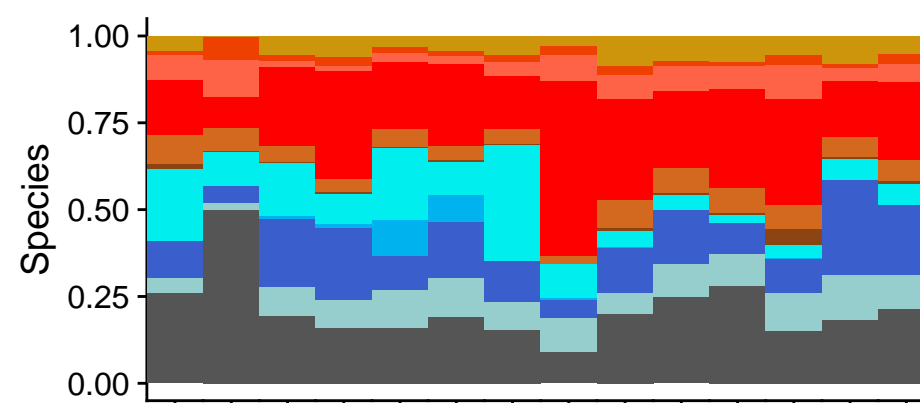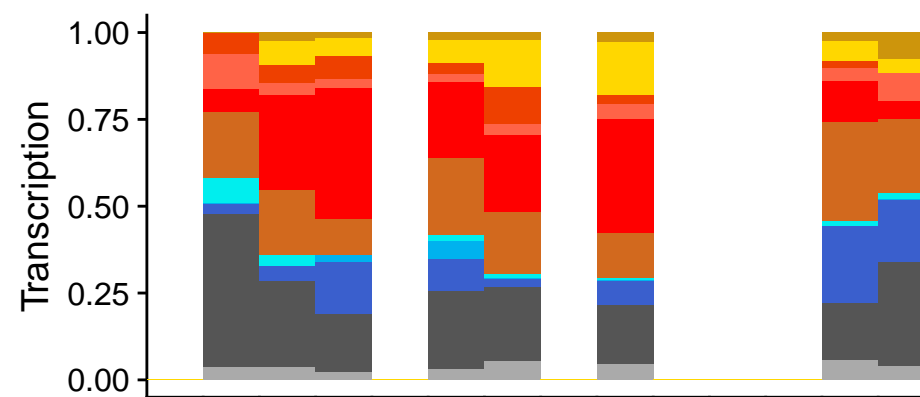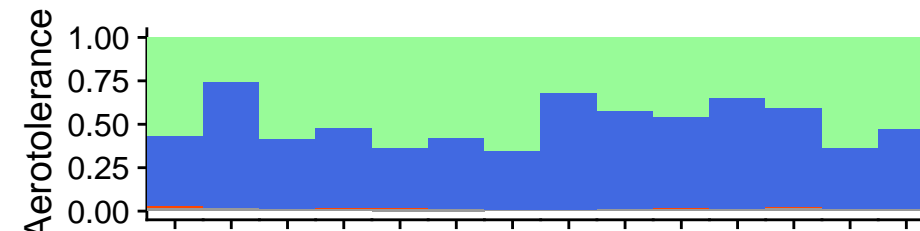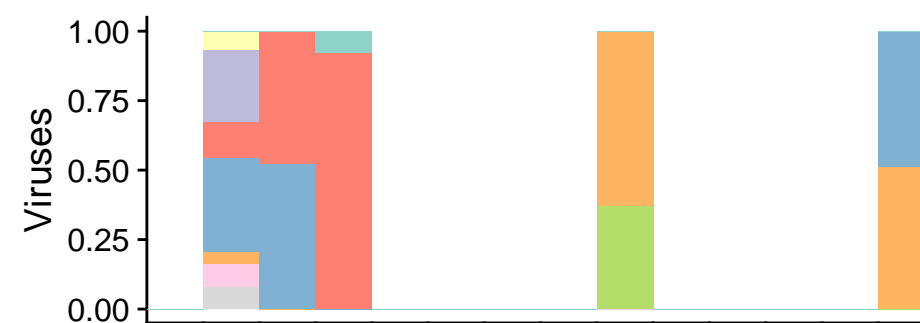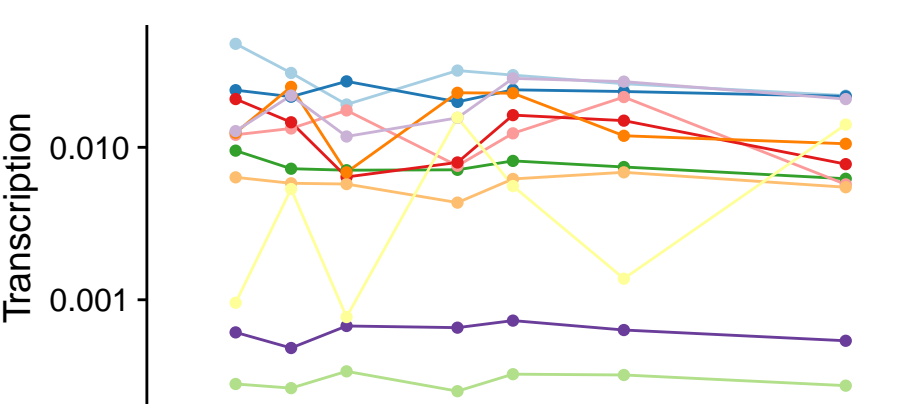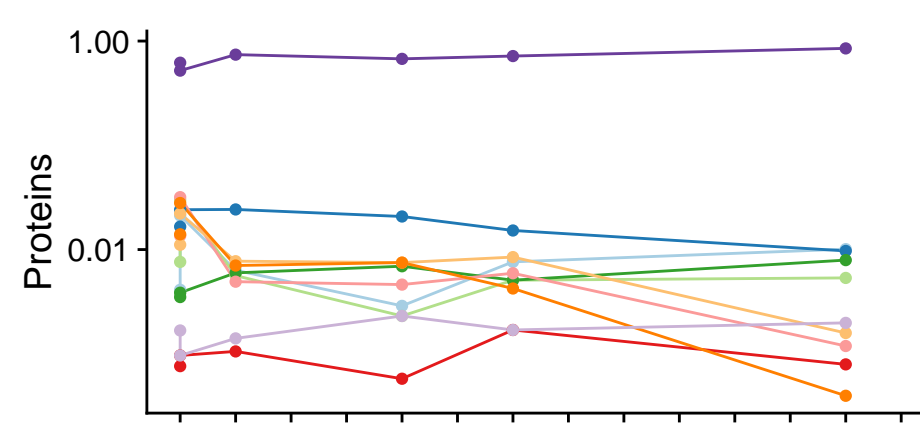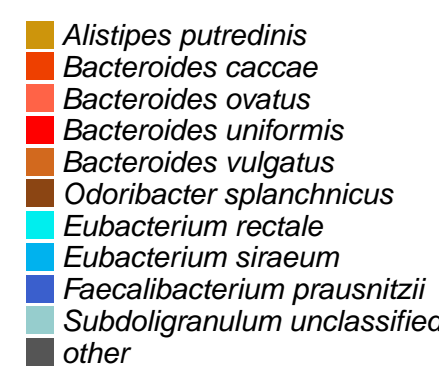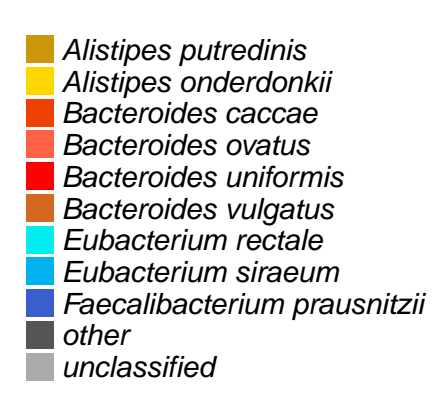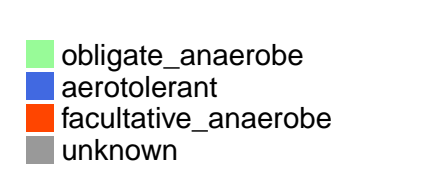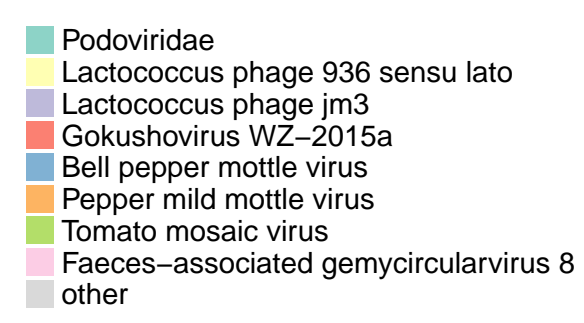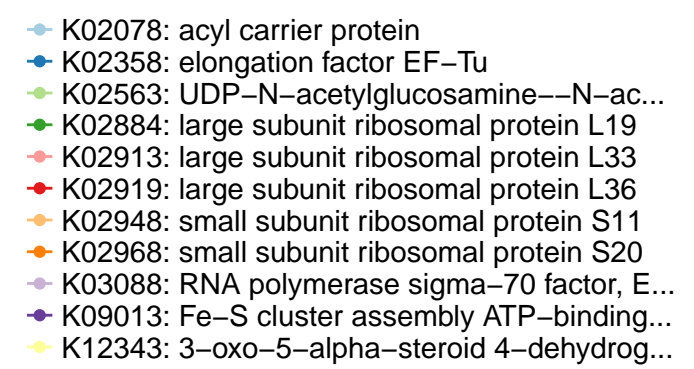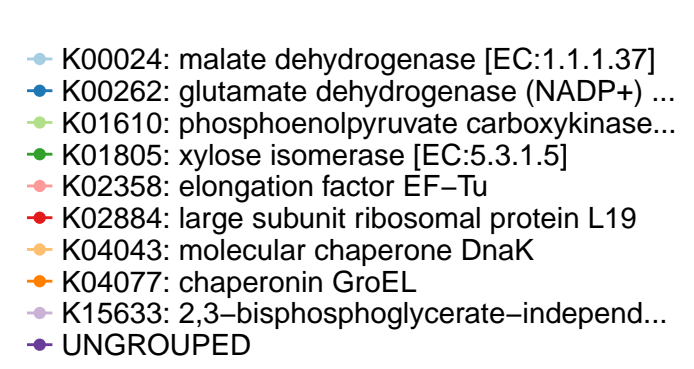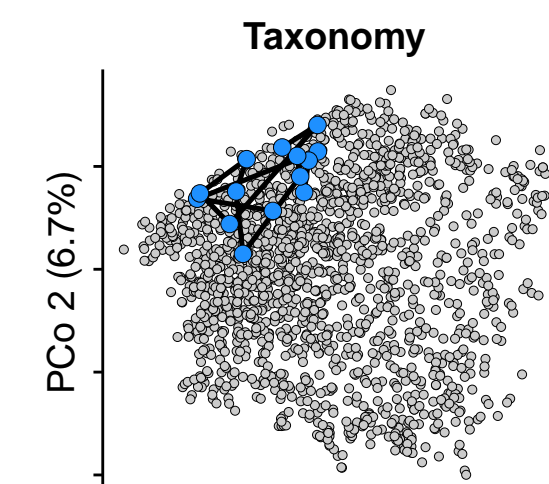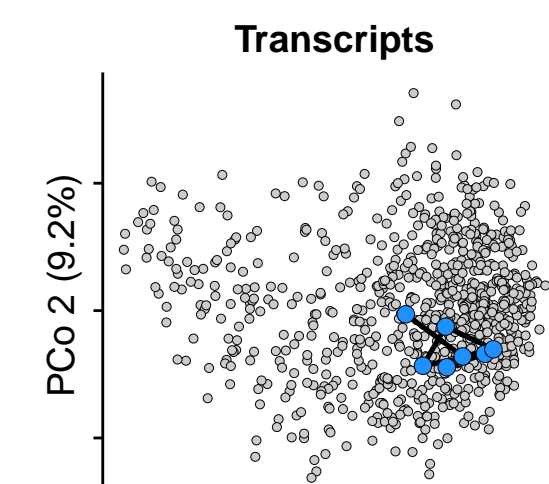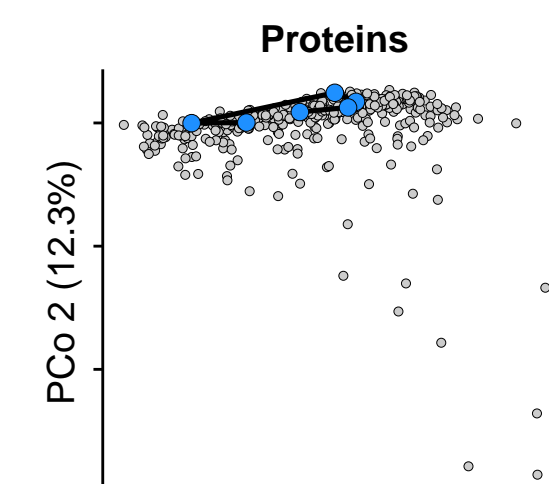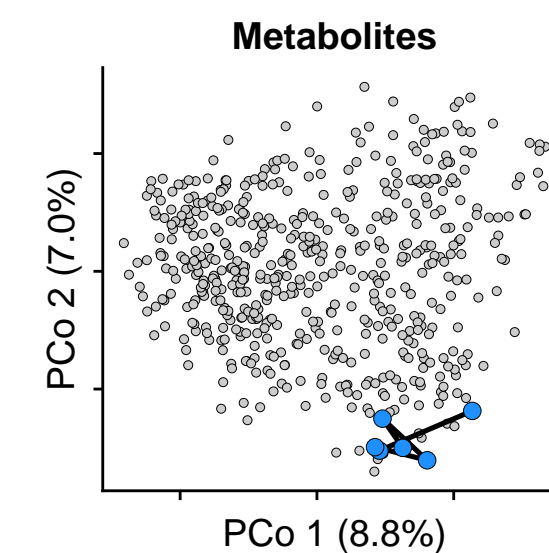

C3013: 26 Female White Cedars–Sinai | UC

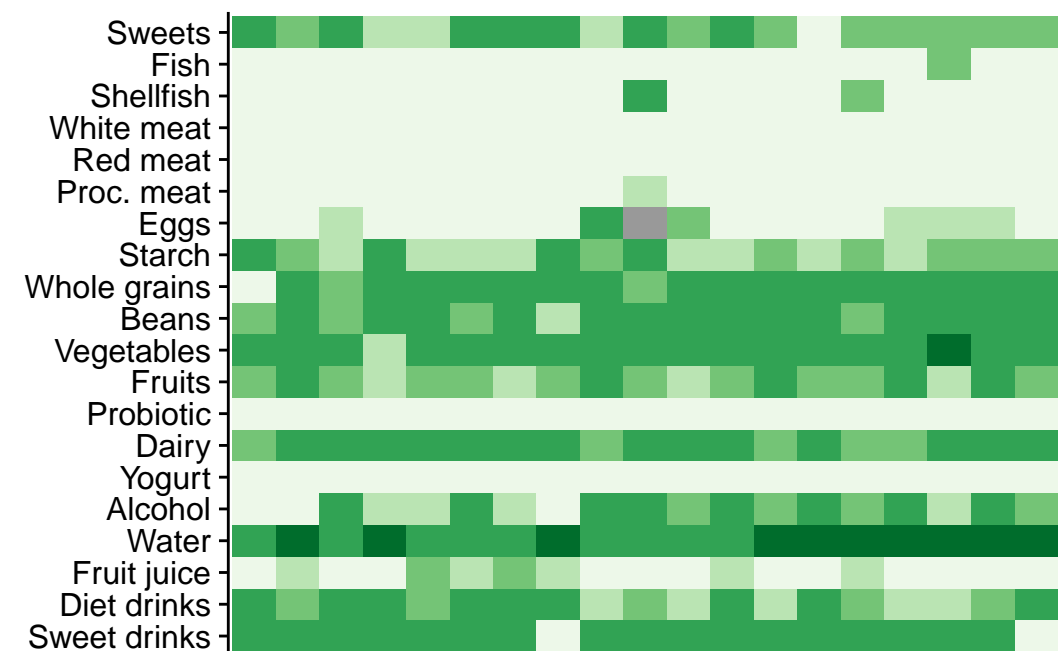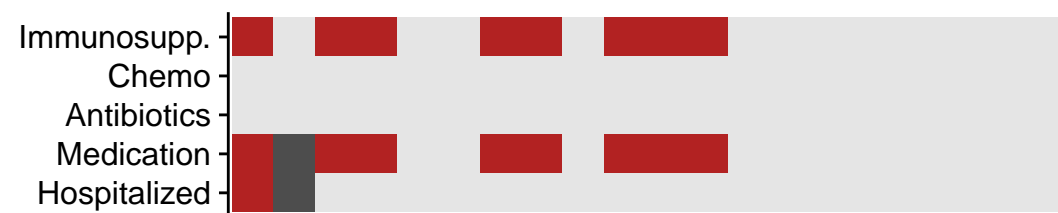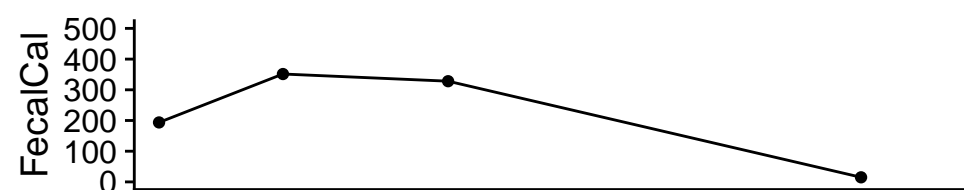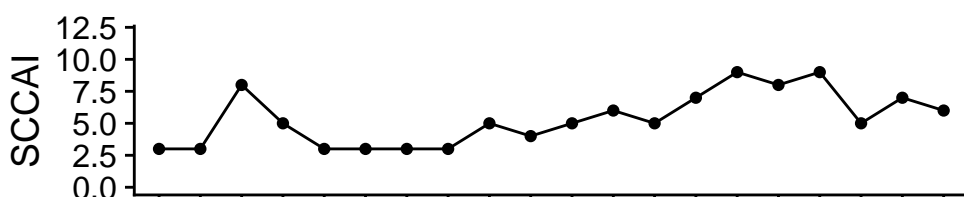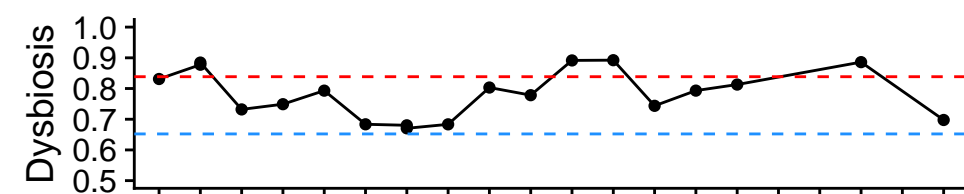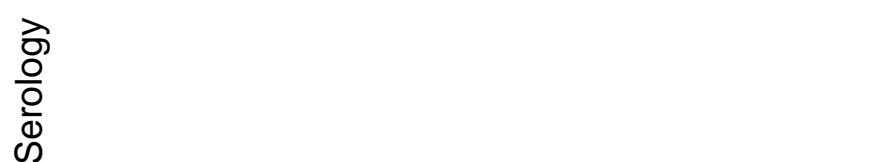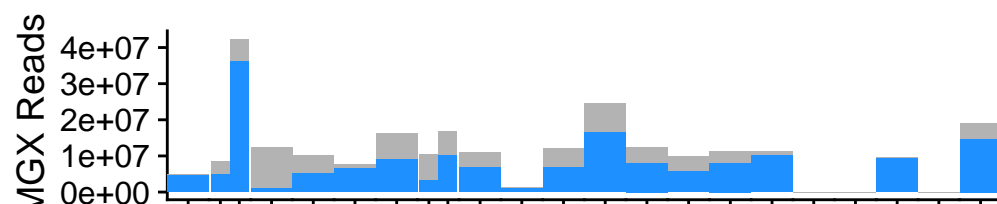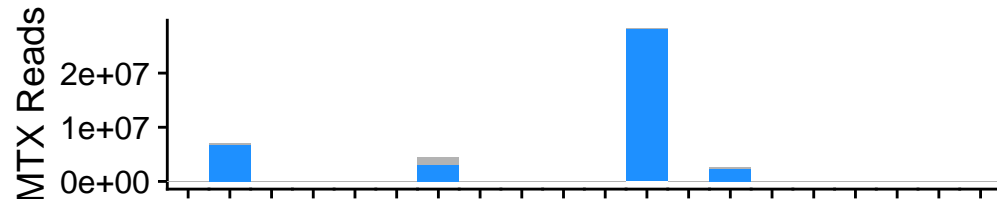

Blank  
None 7+ days  
Within 4-7 days  
Within 2-3 days  
Yesterday 1-2x  
Yesterday 3x+

Yes  
No  
Blank

--- Dysbiosis  
--- Eubiosis

Human  
Filtered

Human  
Filtered

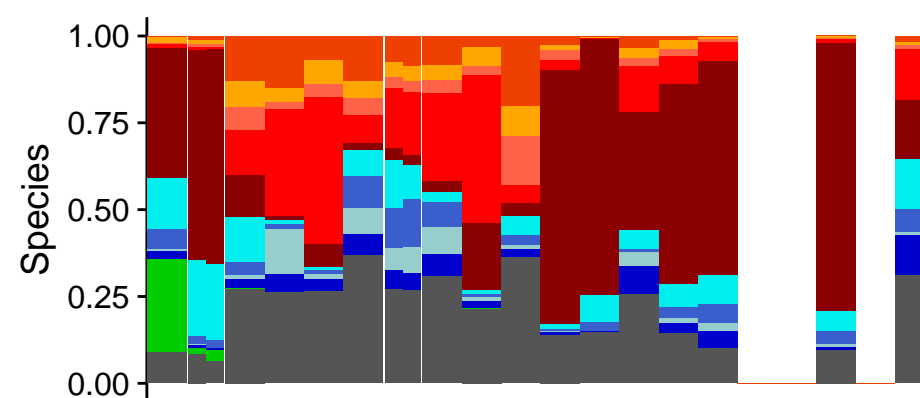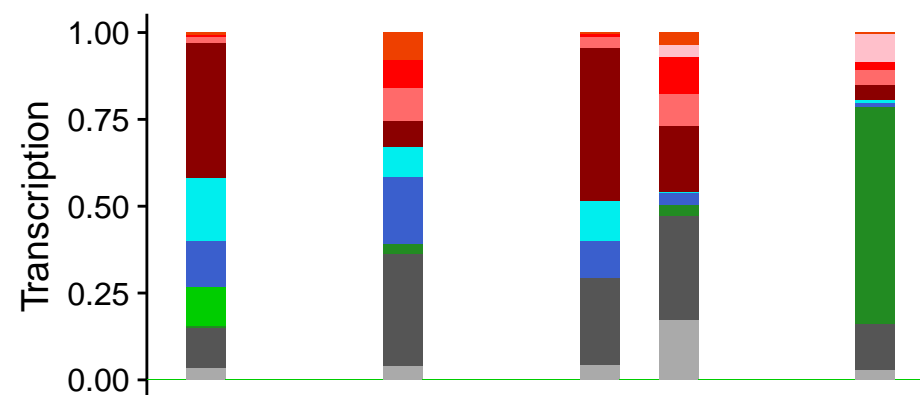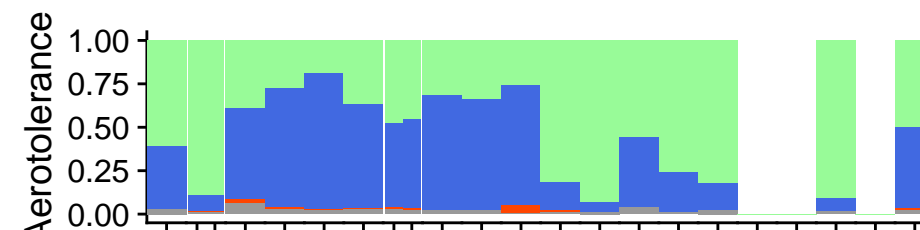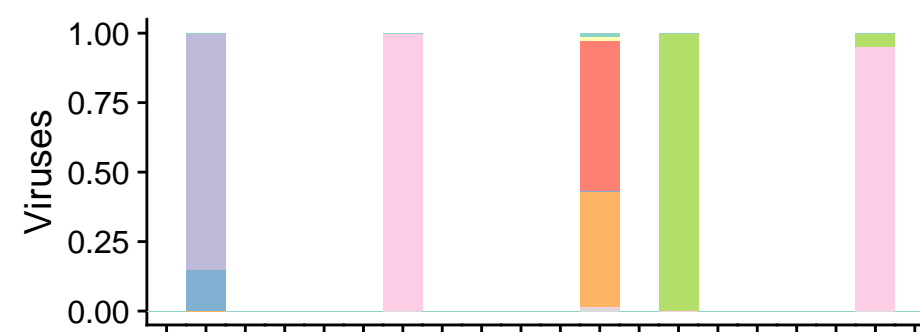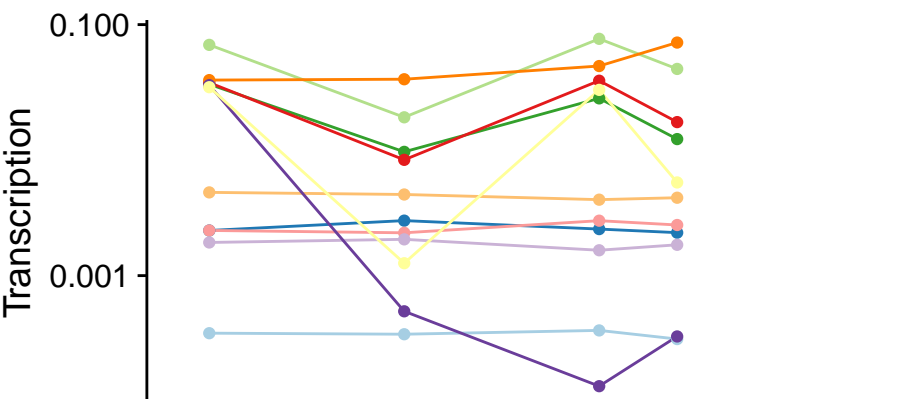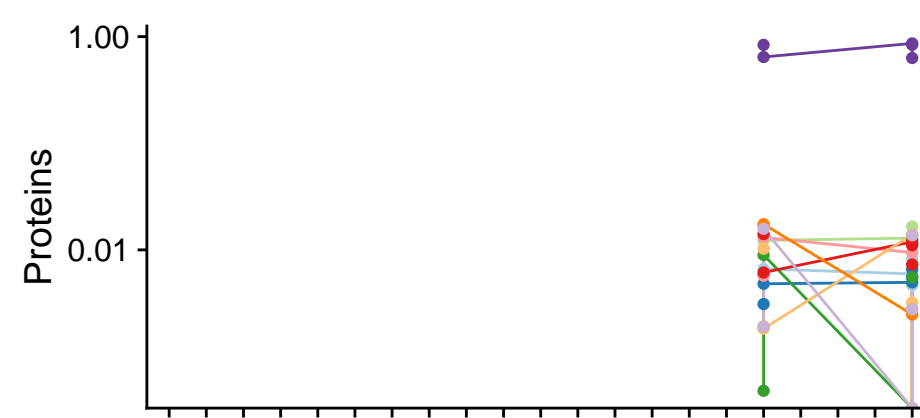

*Bacteroides caccae*  
*Bacteroides dorei*  
*Bacteroides ovatus*  
*Bacteroides uniformis*  
*Prevotella copri*  
*Eubacterium rectale*  
*Faecalibacterium prausnitzii*  
*Subdoligranulum unclassified*  
*Oscillibacter unclassified*  
*Akkermansia muciniphila*  
other

*Bacteroides caccae*  
*Bacteroides fragilis*  
*Bacteroides uniformis*  
*Parabacteroides distasonis*  
*Prevotella copri*  
*Eubacterium rectale*  
*Faecalibacterium prausnitzii*  
*Akkermansia muciniphila*  
*Haemophilus parainfluenzae*  
other  
unclassified

obligate anaerobe  
aerotolerant  
facultative anaerobe  
unknown

unclassified Myoviridae  
Bacillus virus B103  
unclassified C2likevirus  
Siphoviridae  
Lactococcus phage 50101  
Lactococcus phage 936 sensu lato  
Gokushovirus WZ-2015a  
Pepper mild mottle virus  
other

K00057: glycerol-3-phosphate dehydrogena...  
K02111: F-type H<sup>+</sup>-transporting ATPase sub...  
K02358: elongation factor EF-Tu  
K02874: large subunit ribosomal protein L14  
K02879: large subunit ribosomal protein L17  
K02886: large subunit ribosomal protein L2  
K02902: large subunit ribosomal protein L28  
K02914: large subunit ribosomal protein L34  
K03522: electron transfer flavoprotein alpha s...  
K04069: pyruvate formate lyase activating en...  
K09458: 3-oxoacyl-[acyl-carrier-protein] sy...

K00024: malate dehydrogenase [EC:1.1.1.37]  
K00134: glyceraldehyde 3-phosphate dehydr...  
K00262: glutamate dehydrogenase (NADP+) ...  
K01006: pyruvate, orthophosphate dikinase [...  
K01610: phosphoenolpyruvate carboxykinase...  
K01805: xylose isomerase [EC:5.3.1.5]  
K01812: glucuronate isomerase [EC:5.3.1.12]  
K02358: elongation factor EF-Tu  
K04077: chaperonin GroEL  
UNGROUPED

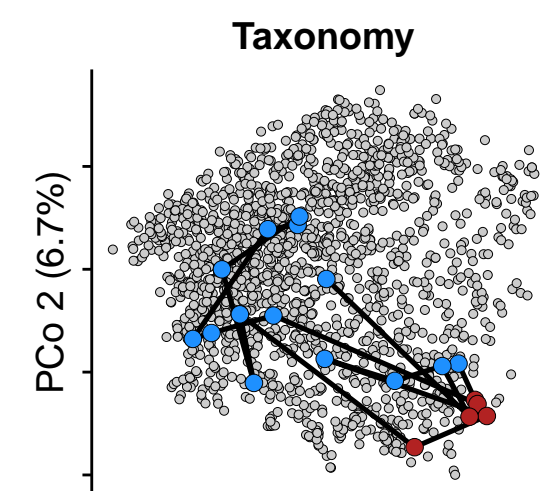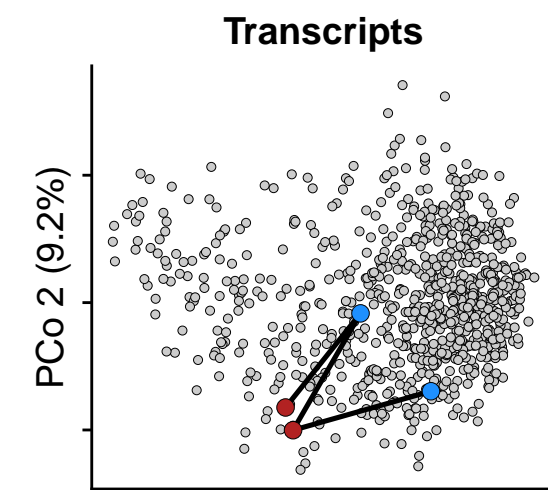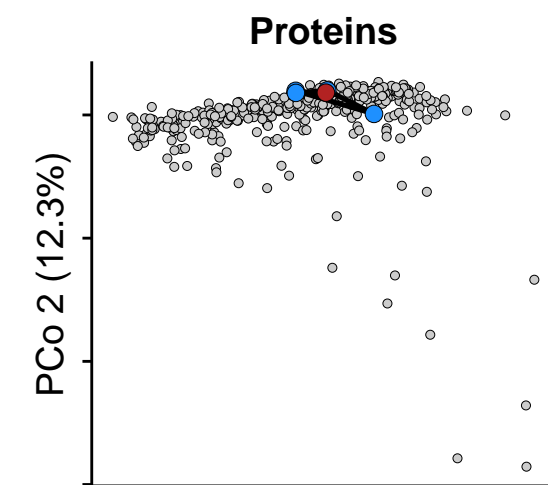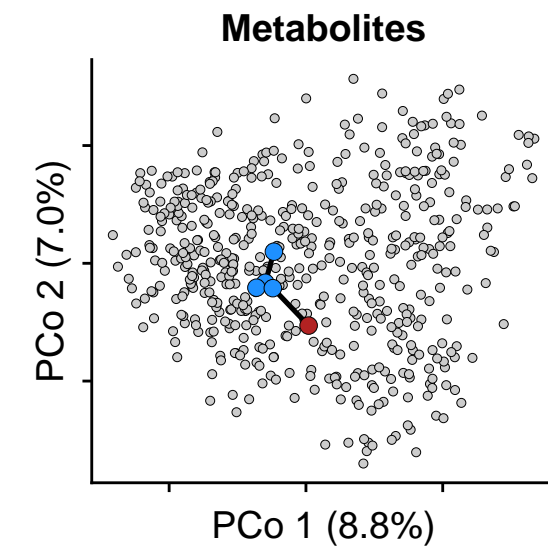

C3015: 50 Female White Cedars–Sinai | UC

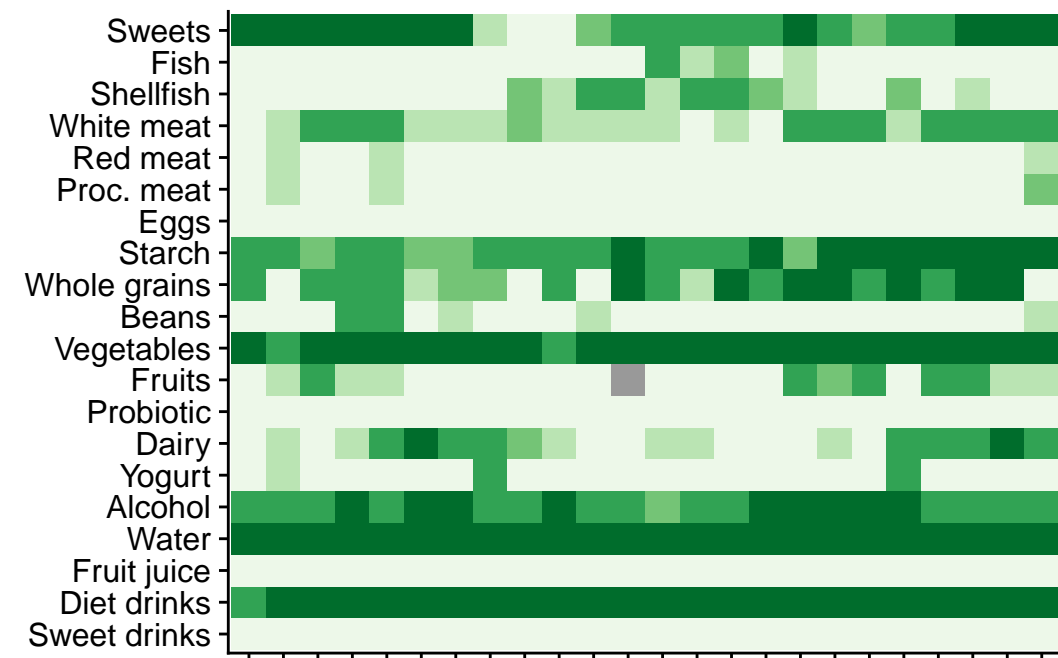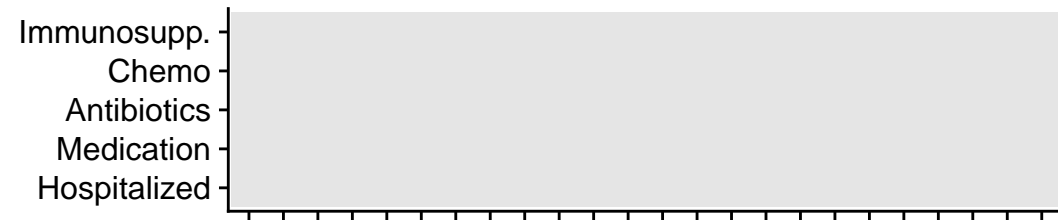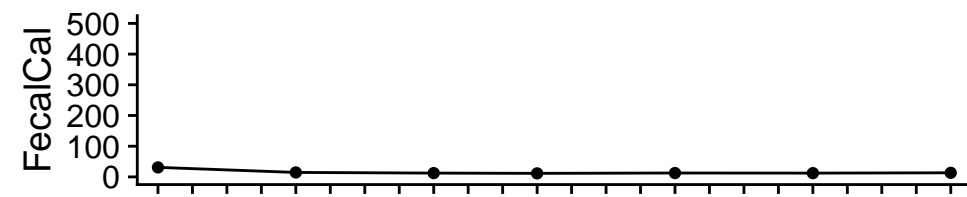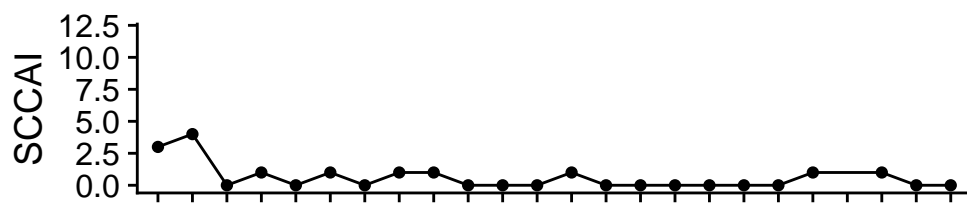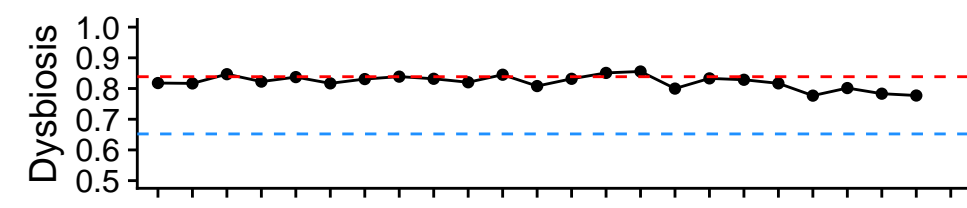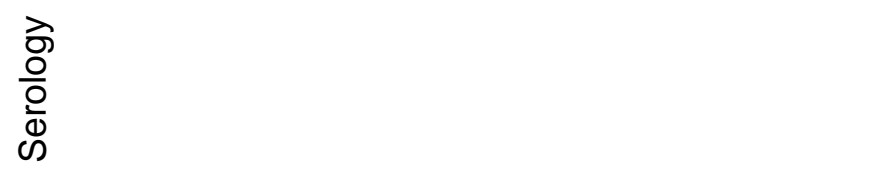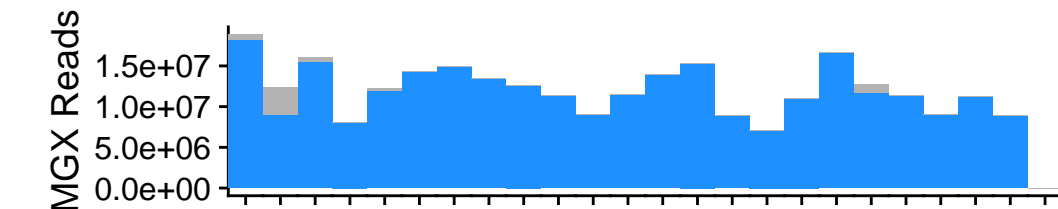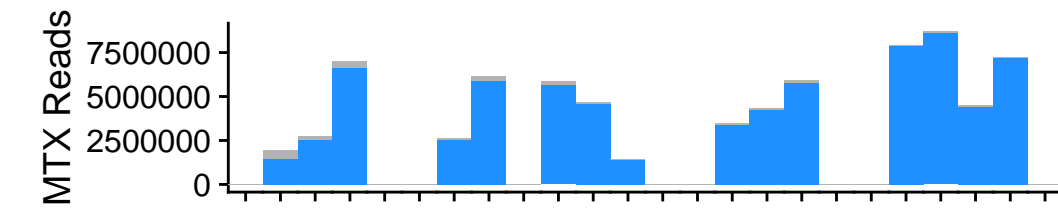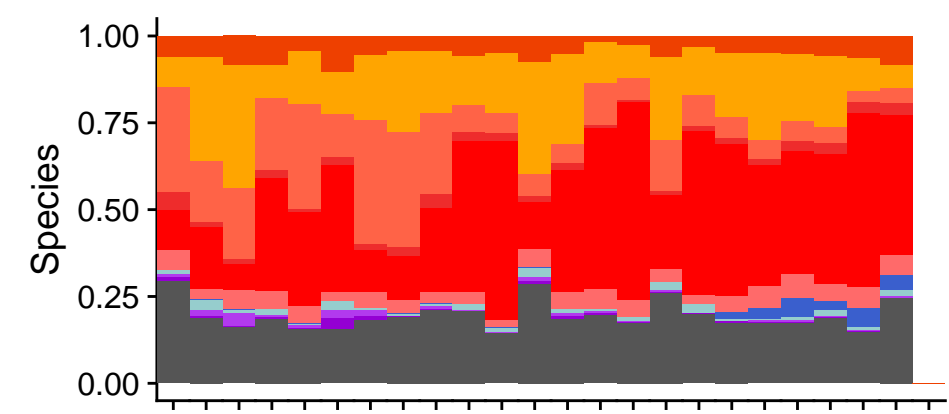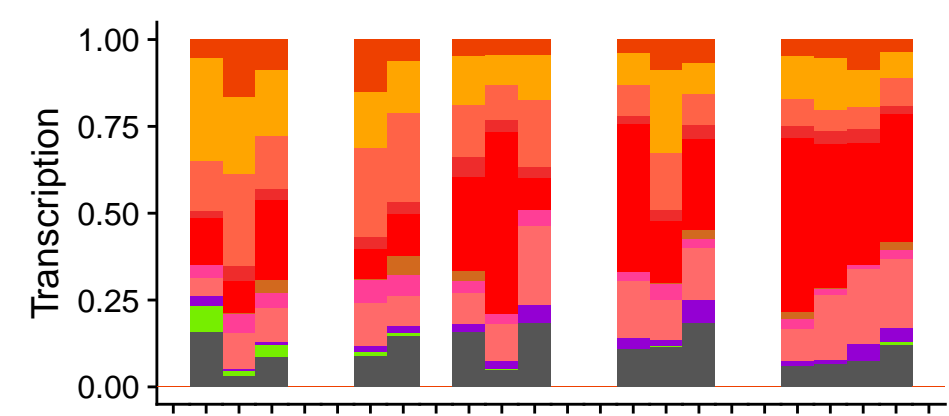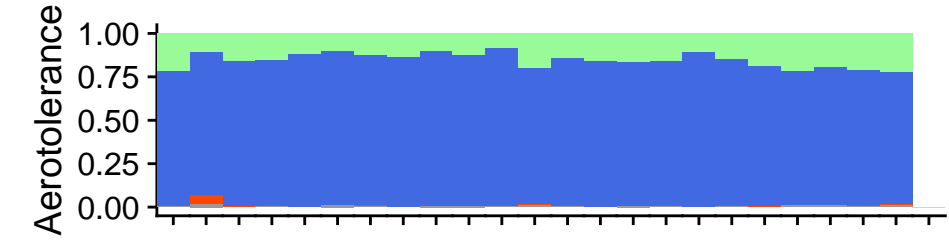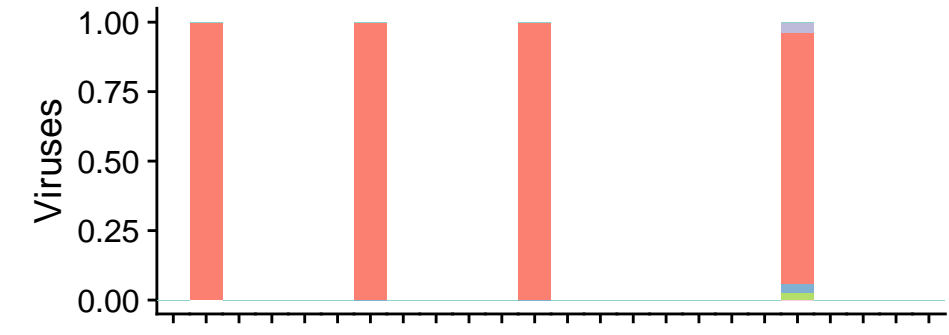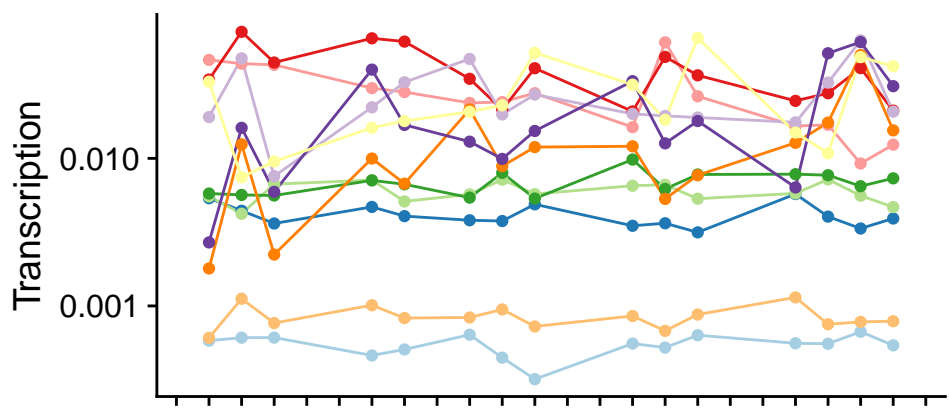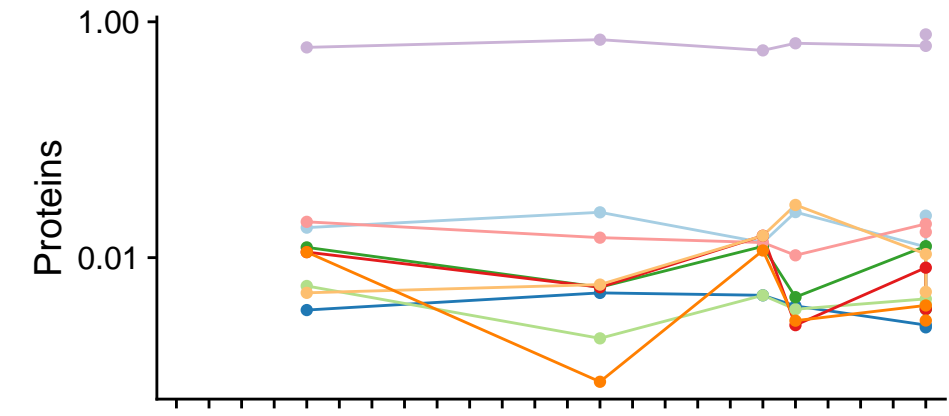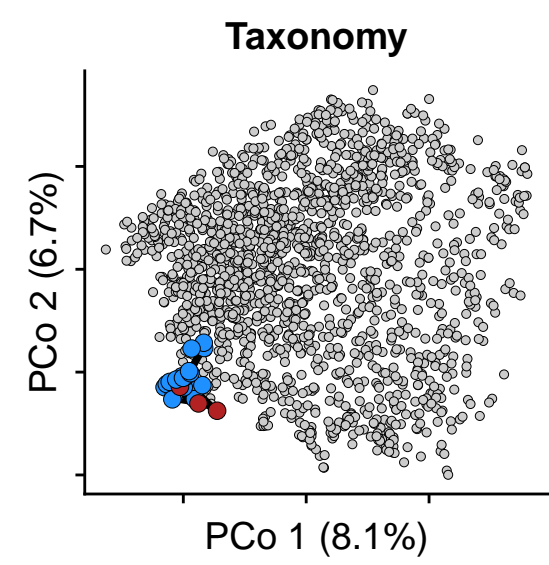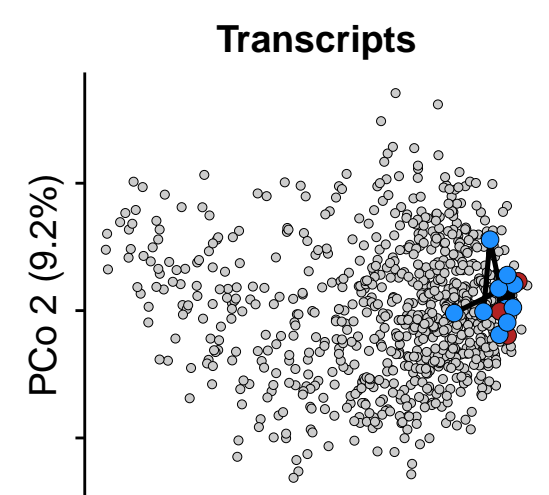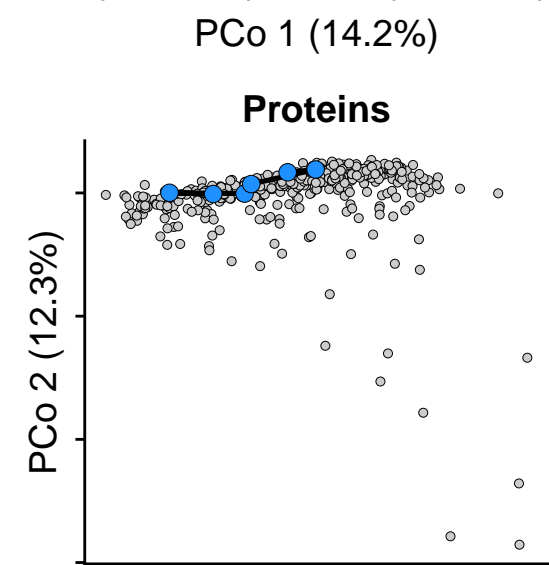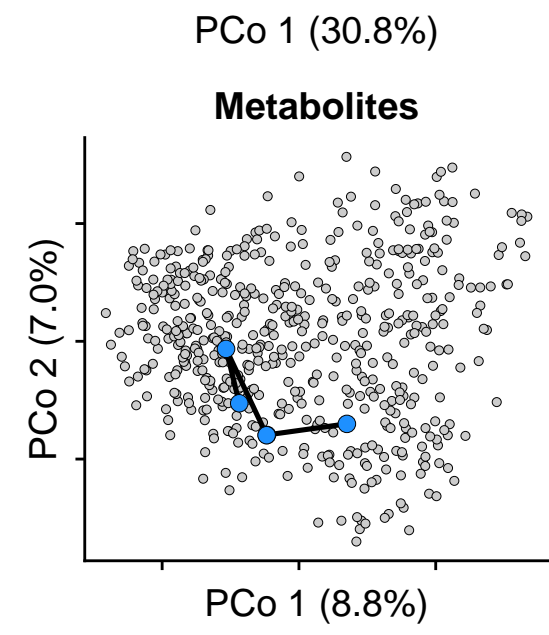

C3016: 32 Female White Cedars–Sinai | CD

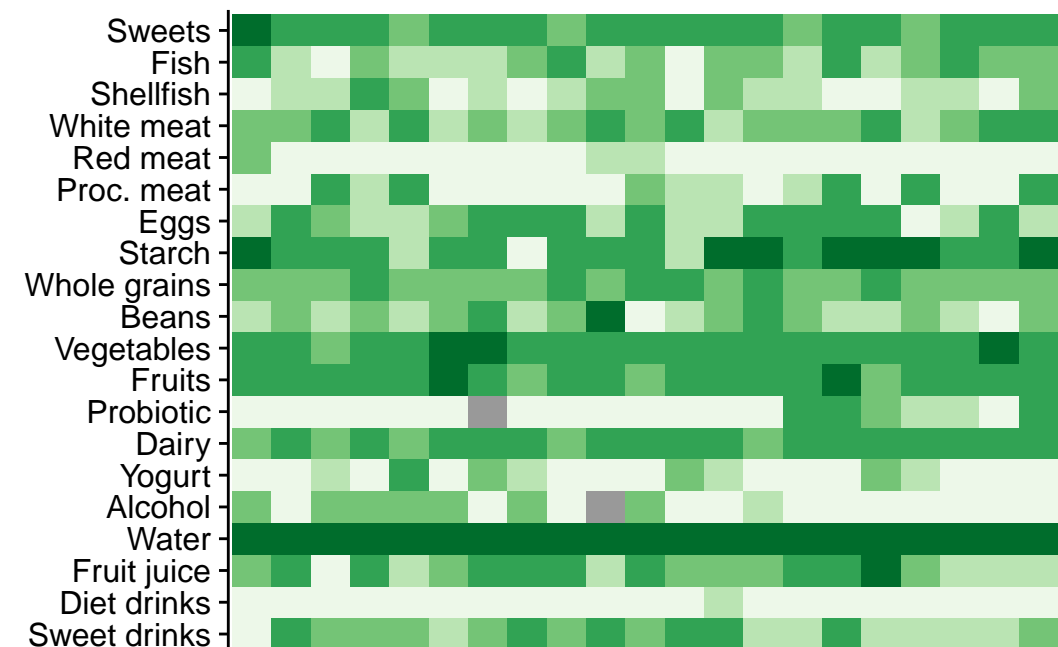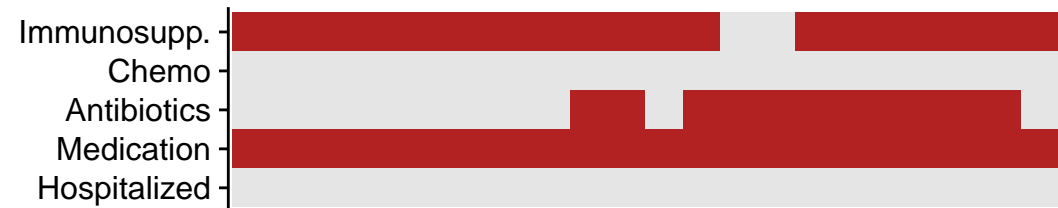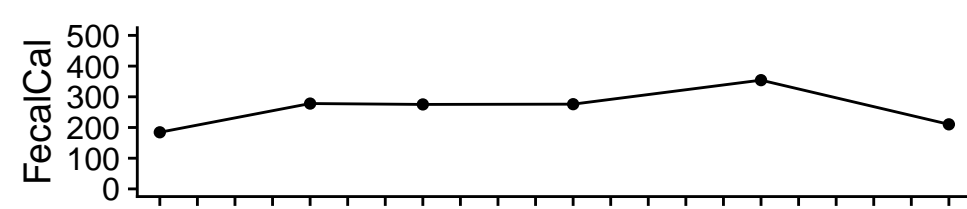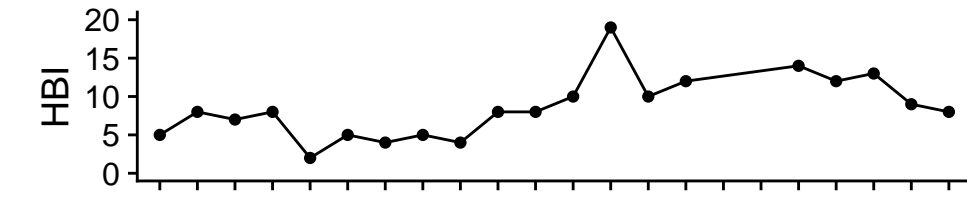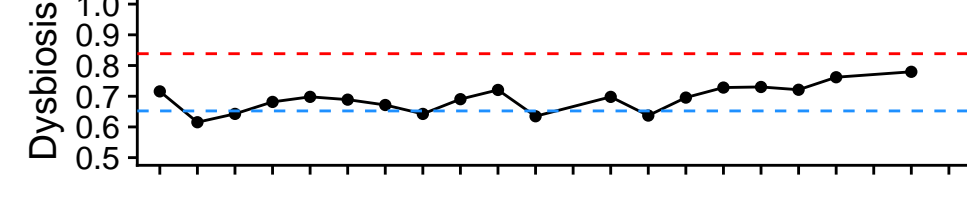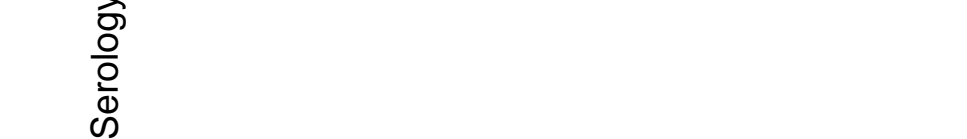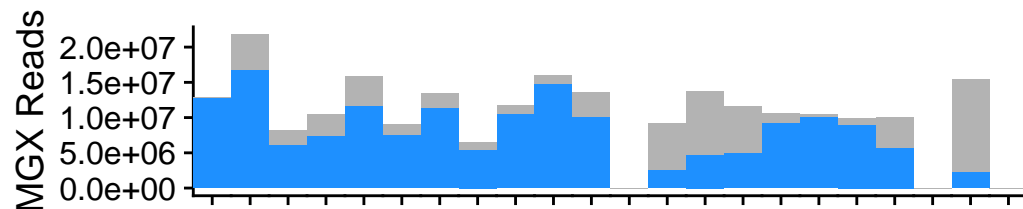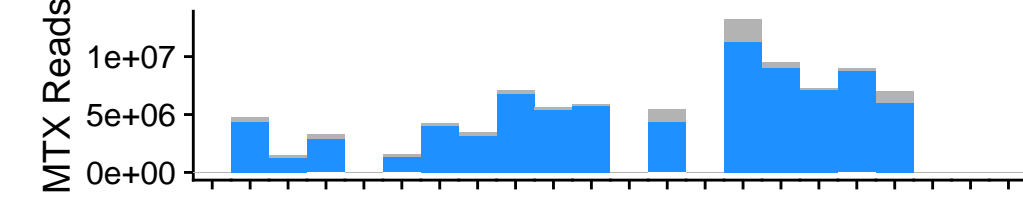

Blank  
None 7+ days  
Within 4-7 days  
Within 2-3 days  
Yesterday 1-2x  
Yesterday 3x+

Yes  
No

--- Dysbiosis  
--- Eubiosis

Human  
Filtered

Human  
Filtered

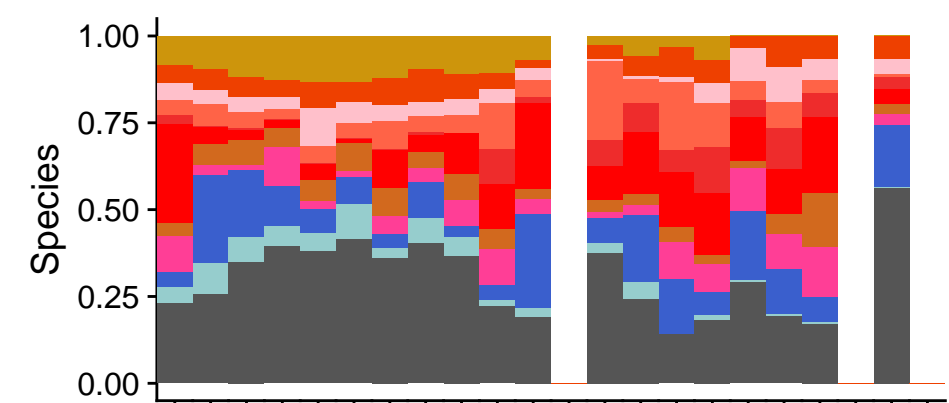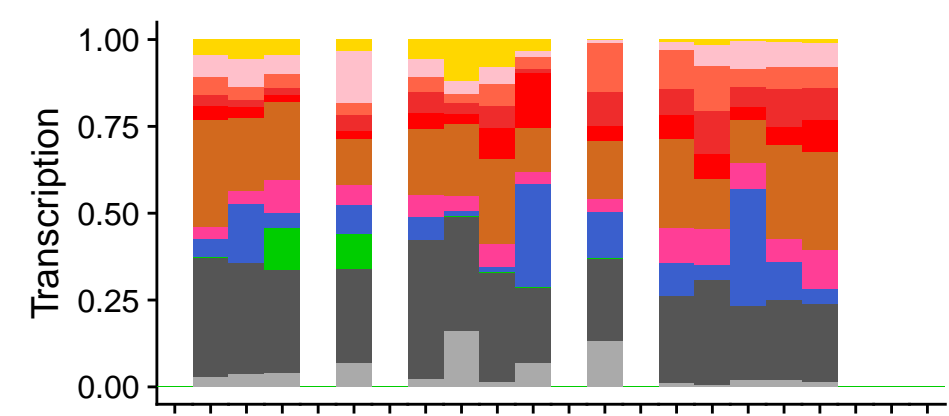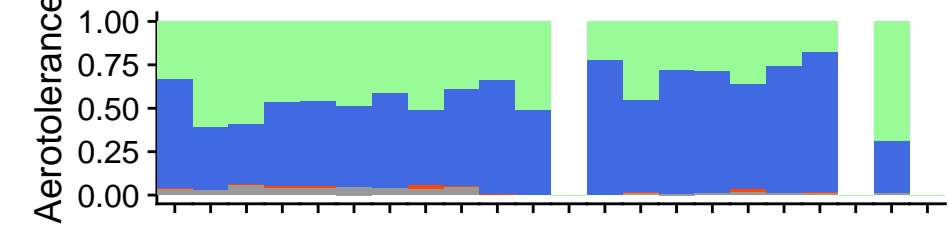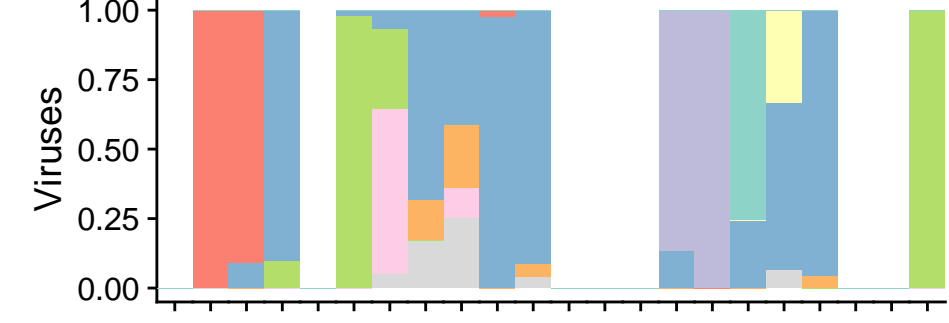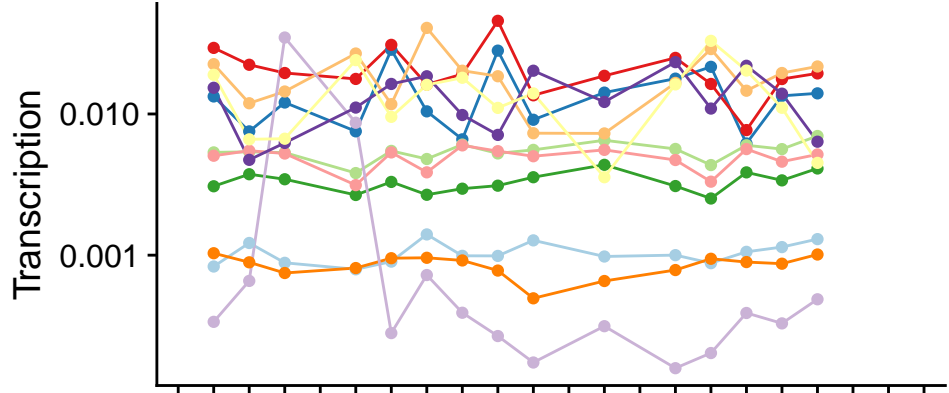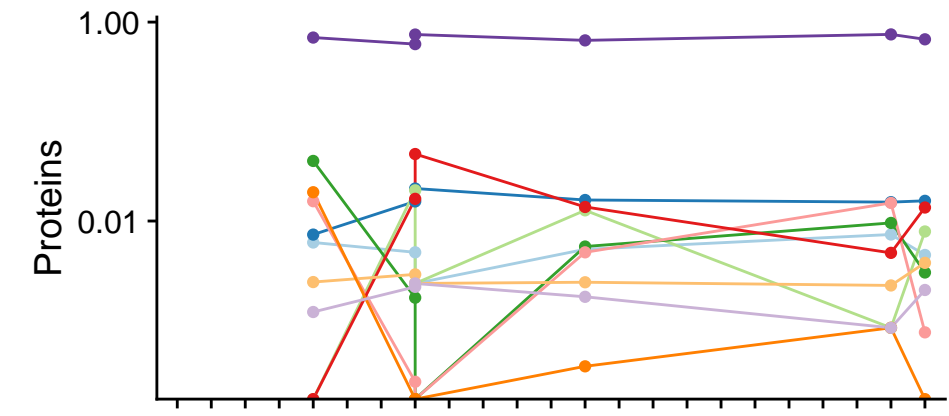

*Alistipes putredinis*  
*Bacteroides caccae*  
*Bacteroides fragilis*  
*Bacteroides ovatus*  
*Bacteroides thetaiotaomicron*  
*Bacteroides uniformis*  
*Bacteroides vulgatus*  
*Bacteroides xylanisolvens*  
*Faecalibacterium prausnitzii*  
*Subdoligranulum unclassified*  
other

*Alistipes onderdonkii*  
*Bacteroides fragilis*  
*Bacteroides ovatus*  
*Bacteroides thetaiotaomicron*  
*Bacteroides uniformis*  
*Bacteroides vulgatus*  
*Bacteroides xylanisolvens*  
*Faecalibacterium prausnitzii*  
*Akkermansia muciniphila*  
other  
unclassified

obligate\_anaerobe  
aerotolerant  
facultative\_anaerobe  
unknown

Yersinia virus D1  
Pseudomonas phage UNO-SLW1  
Gokushovirus WZ-2015a  
Cucumber green mottle mosaic virus  
Pepper mild mottle virus  
Tobacco mild green mosaic virus  
Tomato mosaic virus  
Pepino mosaic virus  
other

K01951: GMP synthase (glutamine-hydrolysi...  
K02078: acyl carrier protein  
K02886: large subunit ribosomal protein L2  
K02926: large subunit ribosomal protein L4  
K02948: small subunit ribosomal protein S11  
K02968: small subunit ribosomal protein S20  
K03088: RNA polymerase sigma-70 factor, E...  
K03797: carboxyl-terminal processing protea...  
K04069: pyruvate formate lyase activating en...  
K04078: chaperonin GroES  
K13993: HSP20 family protein

K00134: glyceraldehyde 3-phosphate dehydr...  
K00262: glutamate dehydrogenase (NADP+) ...  
K01006: pyruvate, orthophosphate dikinase [...]  
K01805: xylose isomerase [EC:5.3.1.5]  
K01812: glucuronate isomerase [EC:5.3.1.12]  
K02358: elongation factor EF-Tu  
K02867: large subunit ribosomal protein L11  
K03781: catalase [EC:1.11.1.6]  
K15633: 2,3-bisphosphoglycerate-independ...  
UNGROUPED

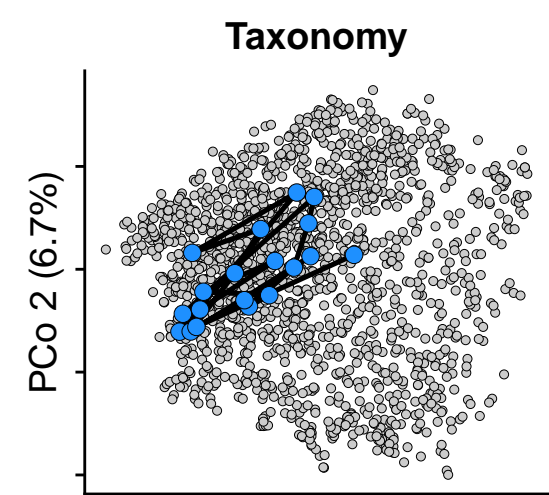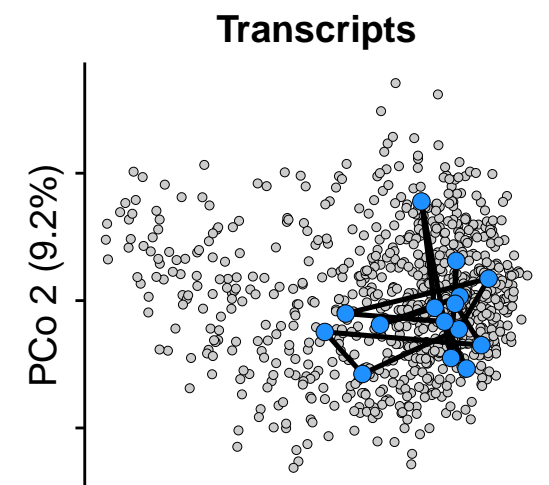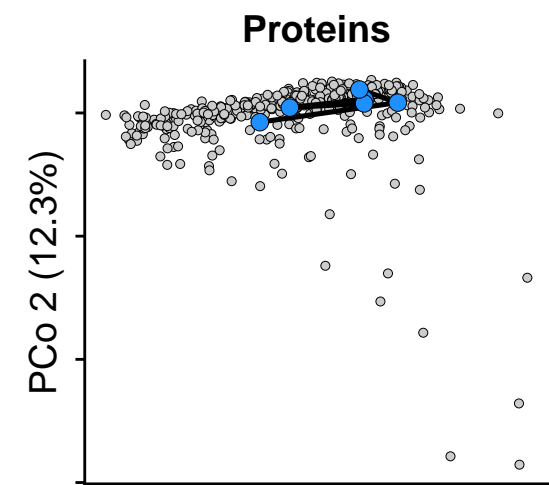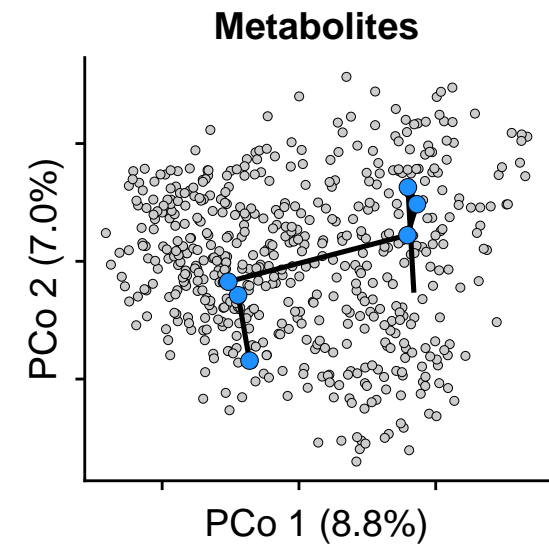



C3017: 45 Male Other Cedars–Sinai | CD L3

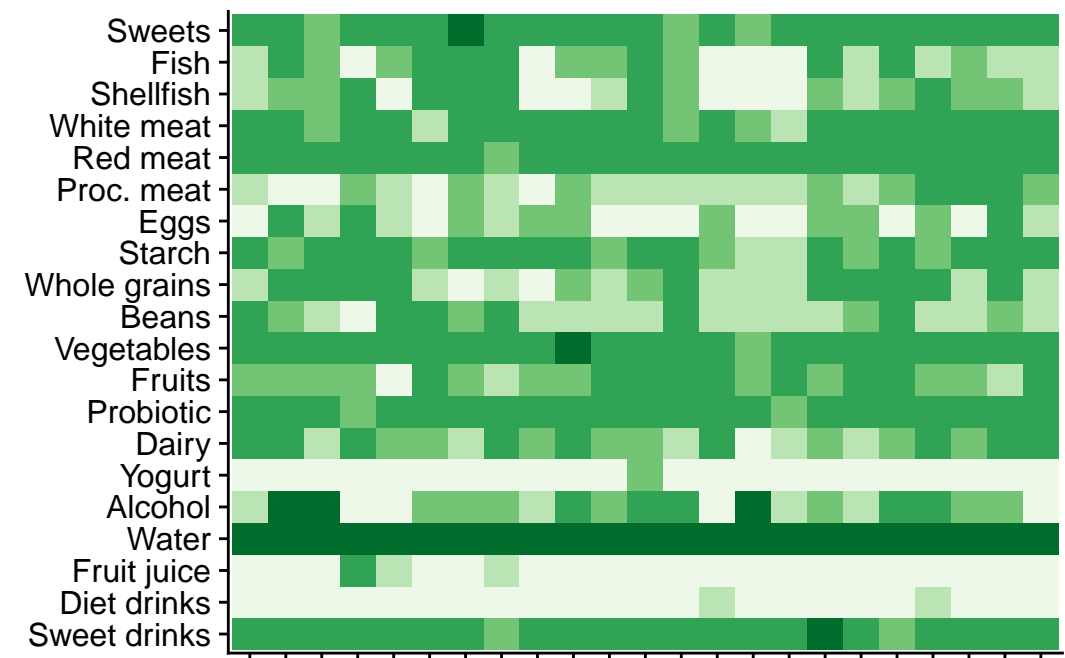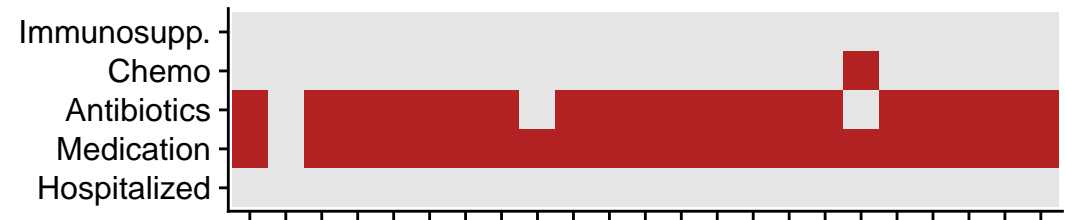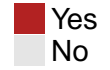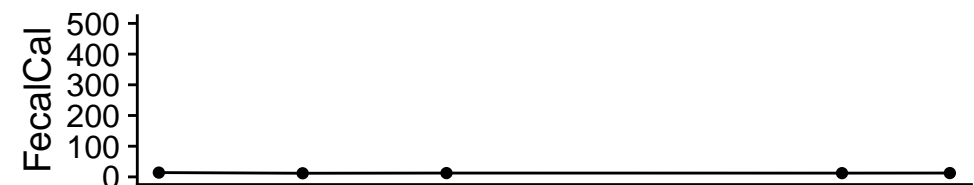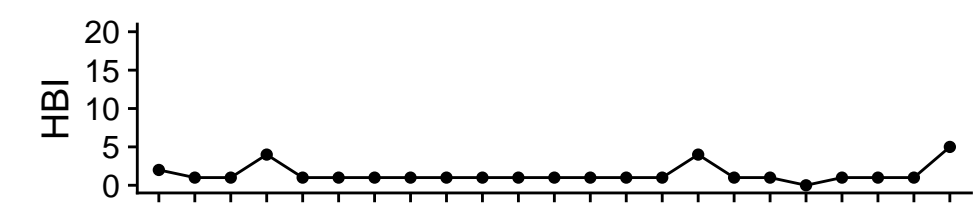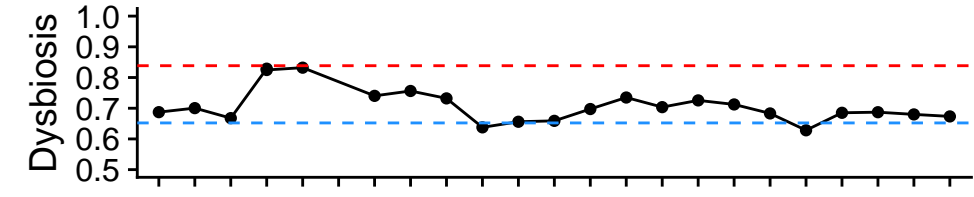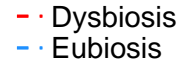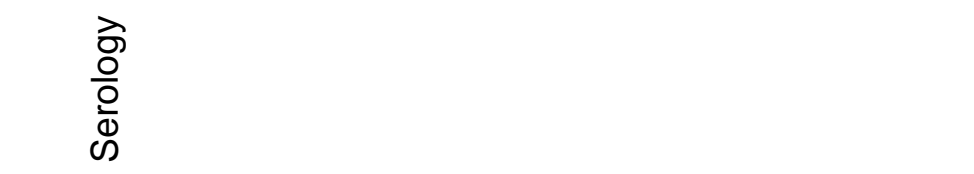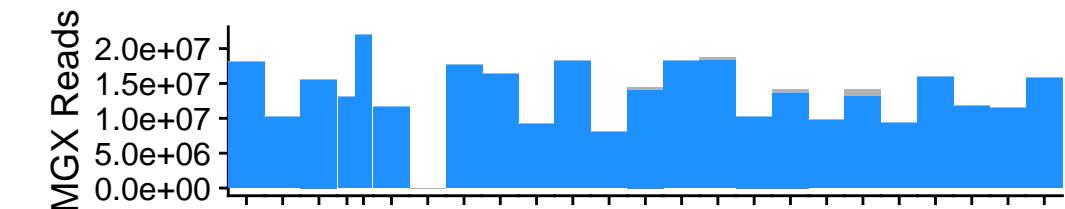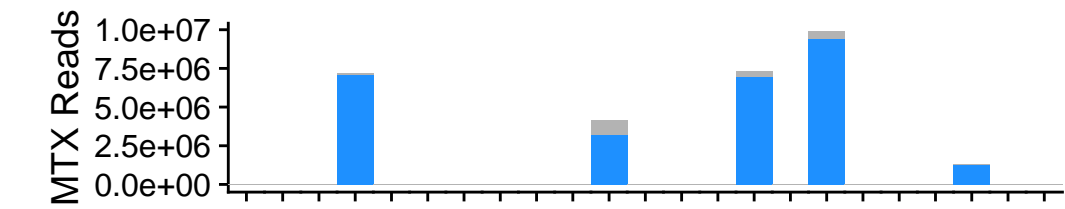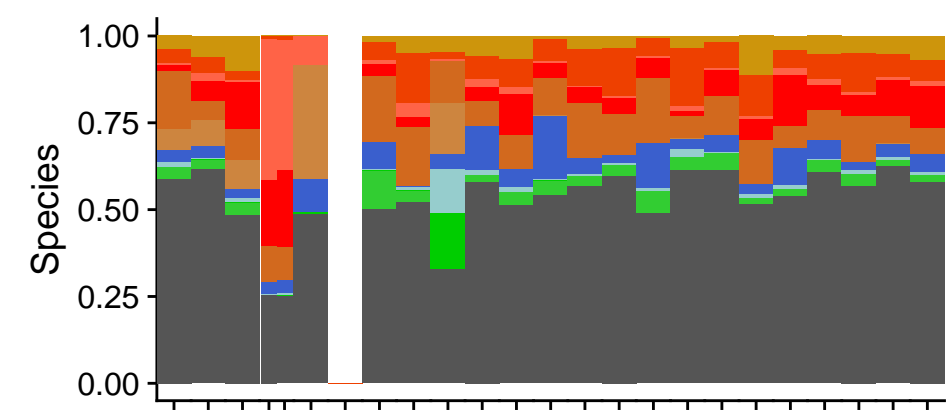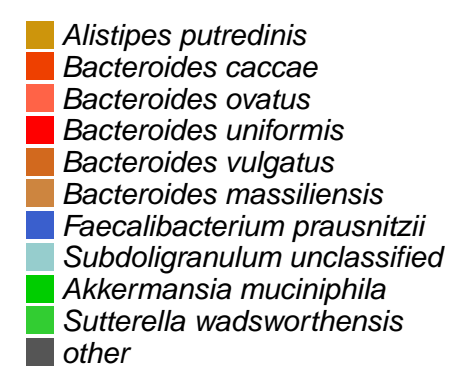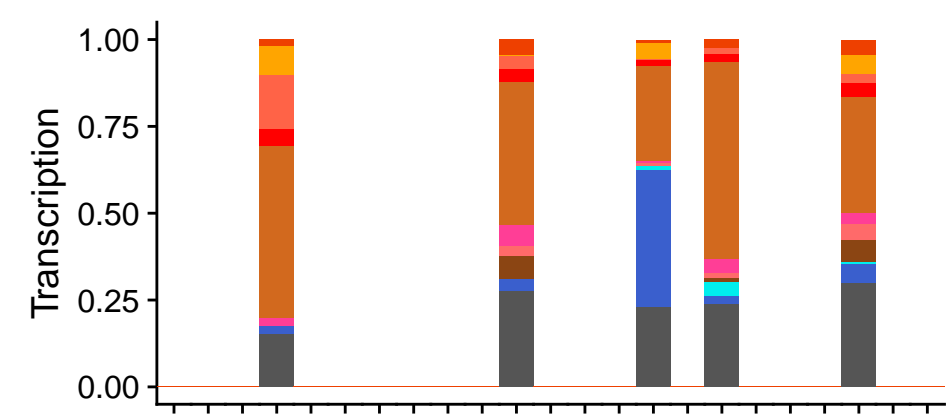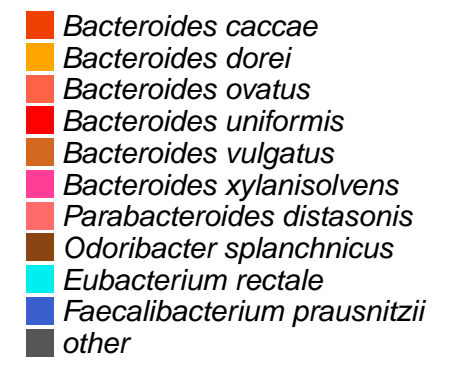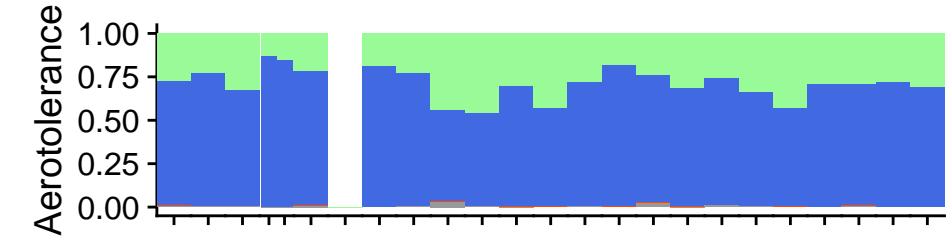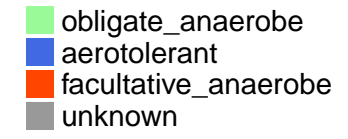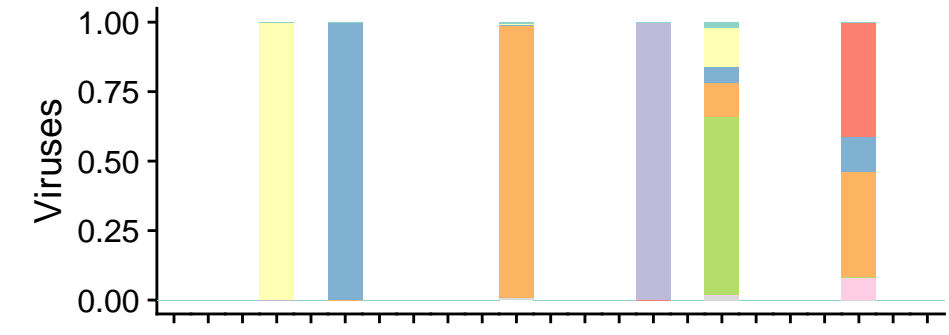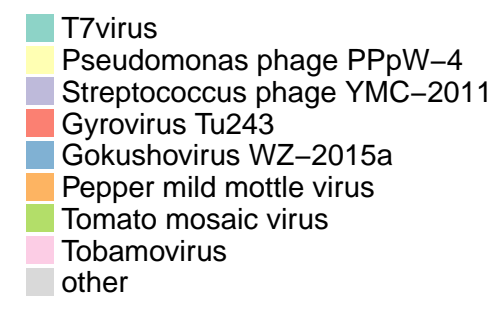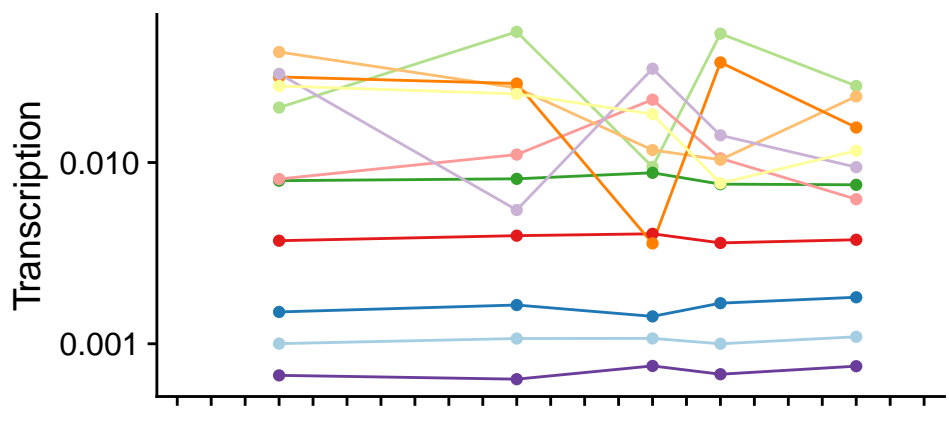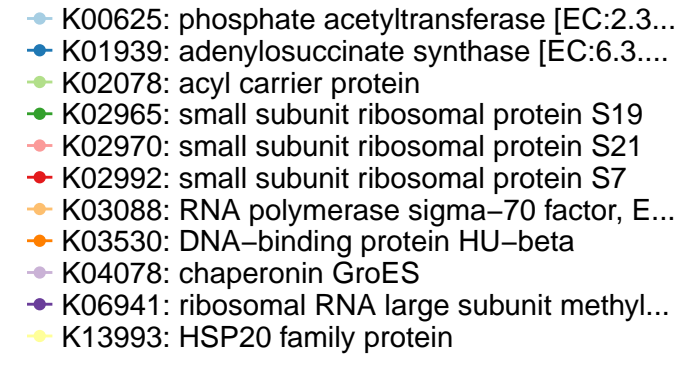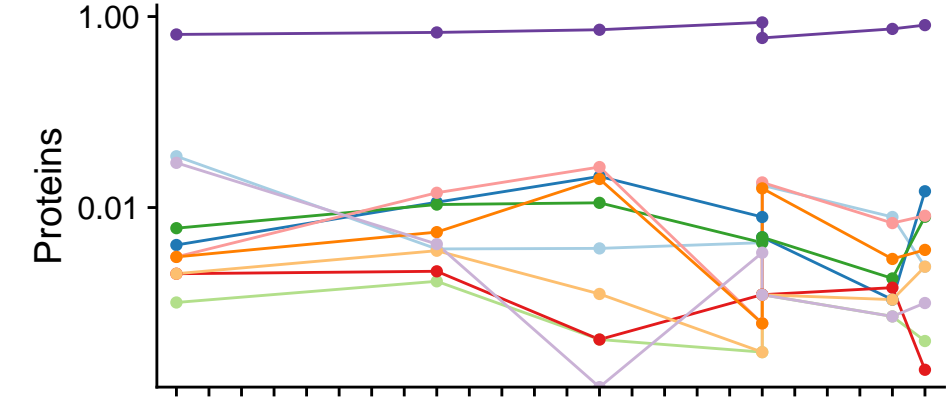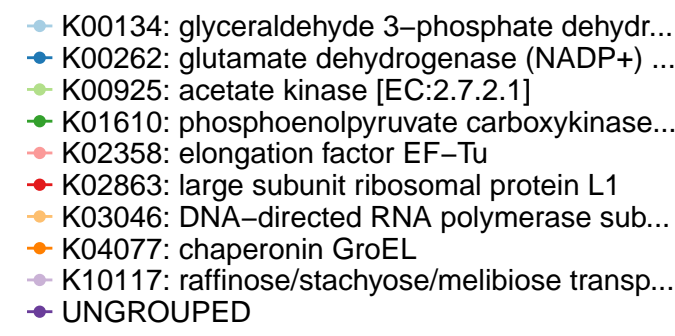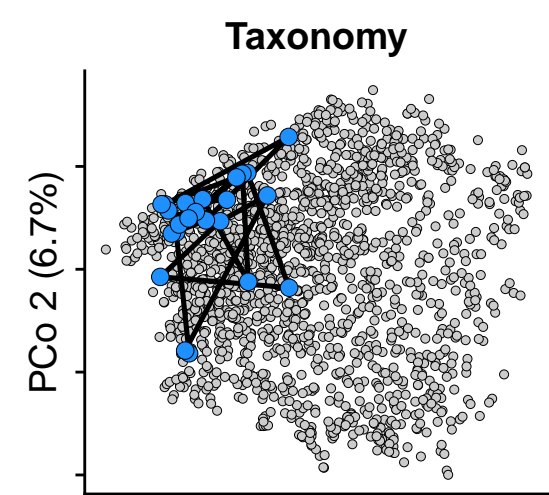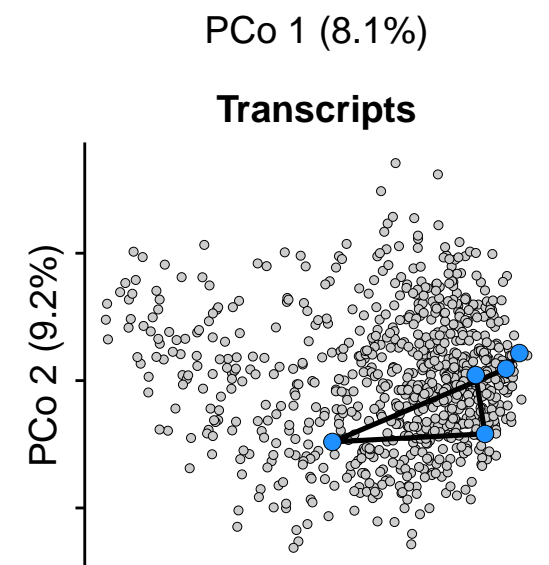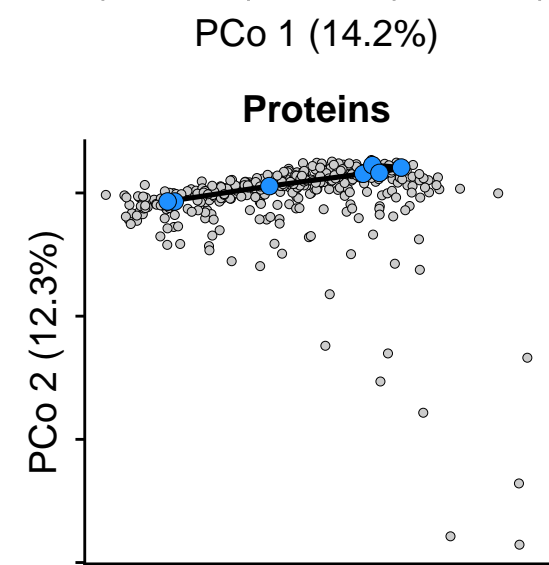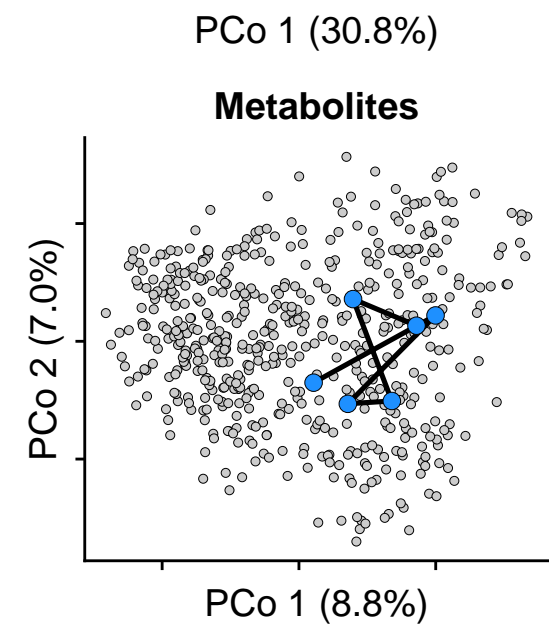

C3021: 38 Female White Cedars–Sinai | CD L2

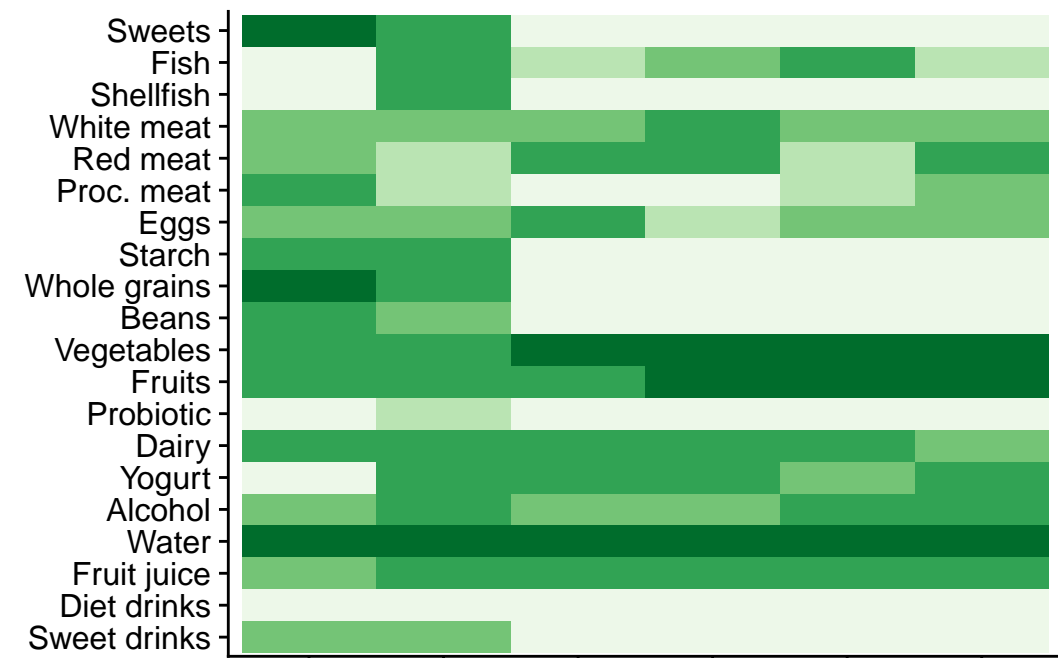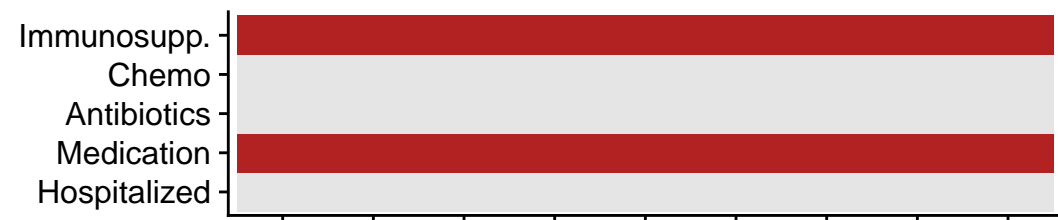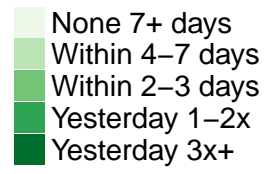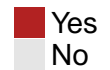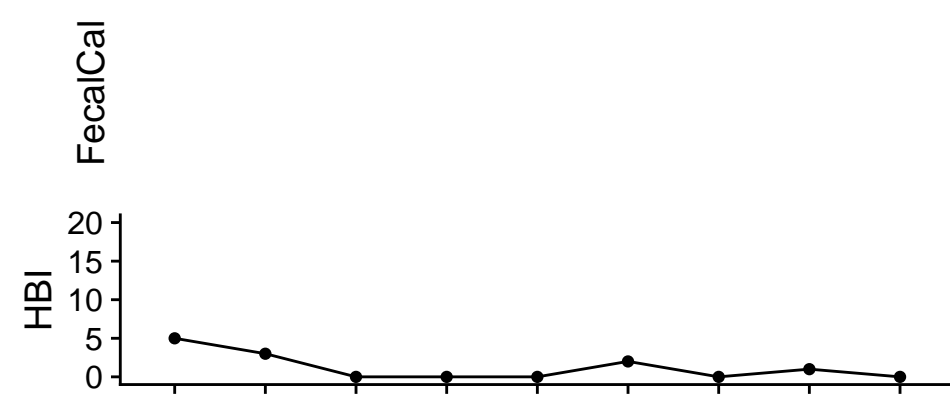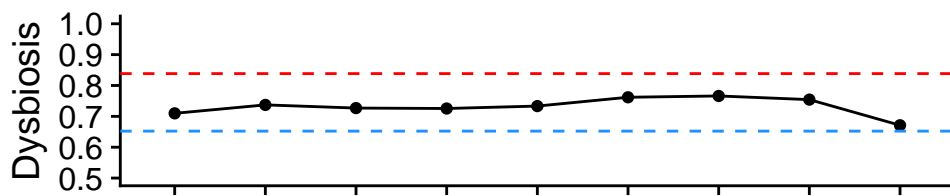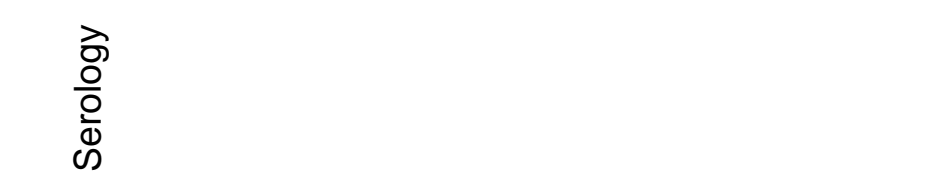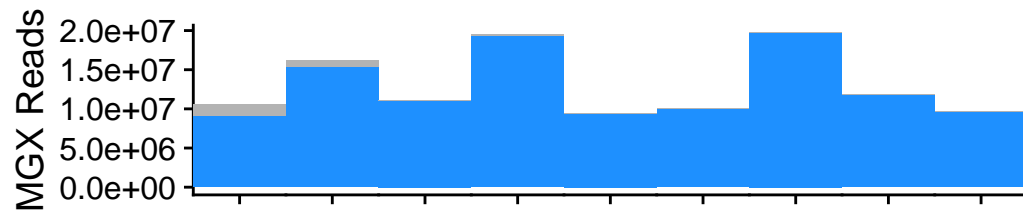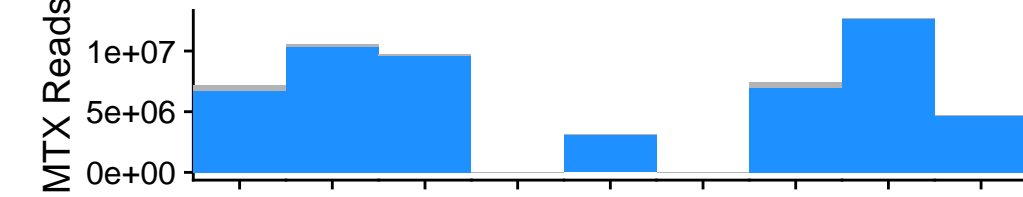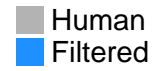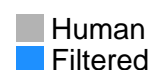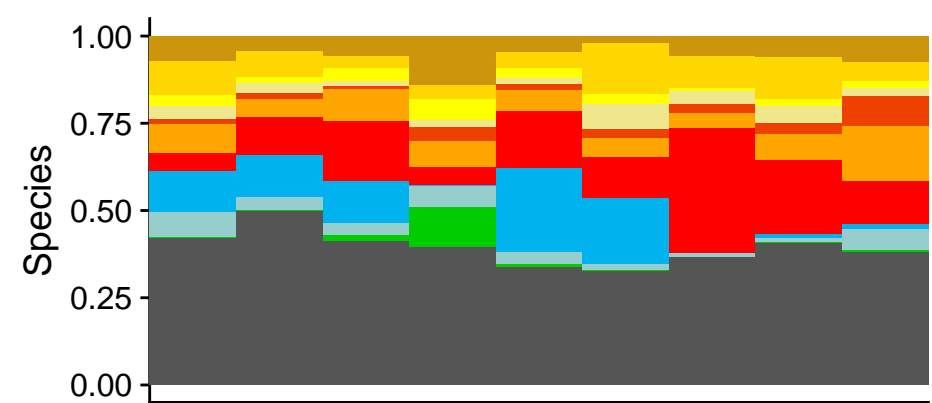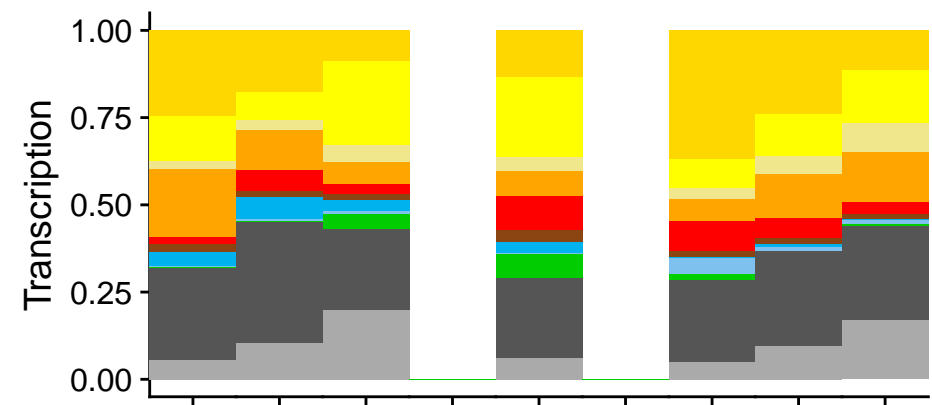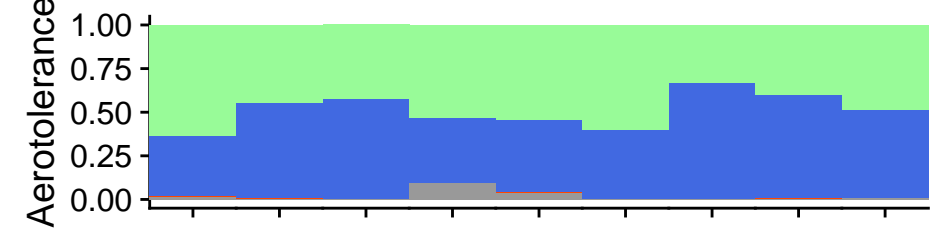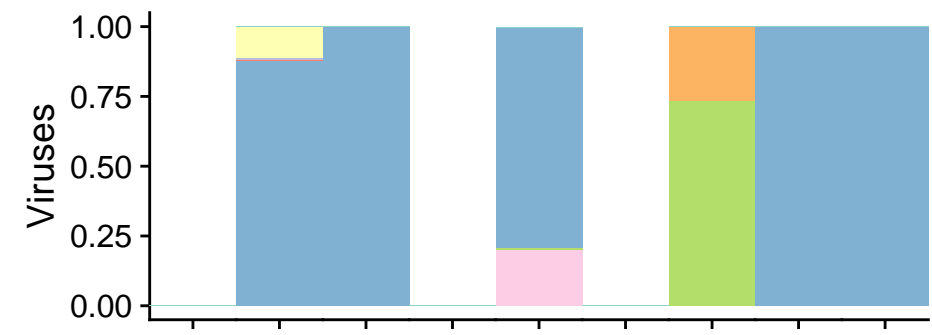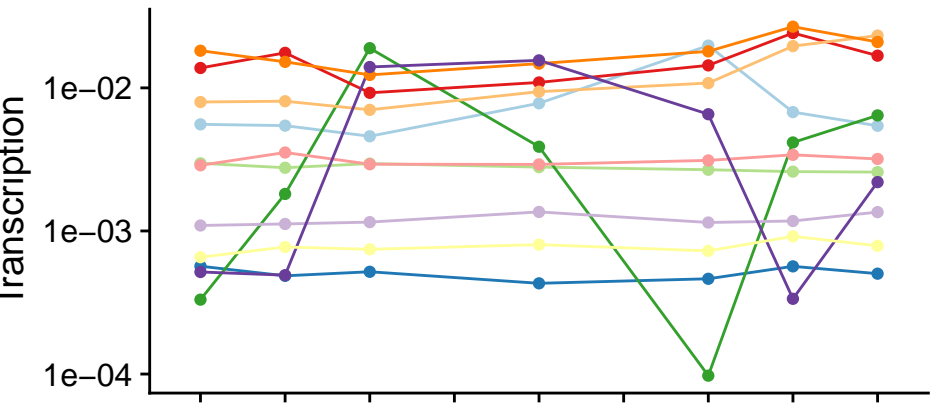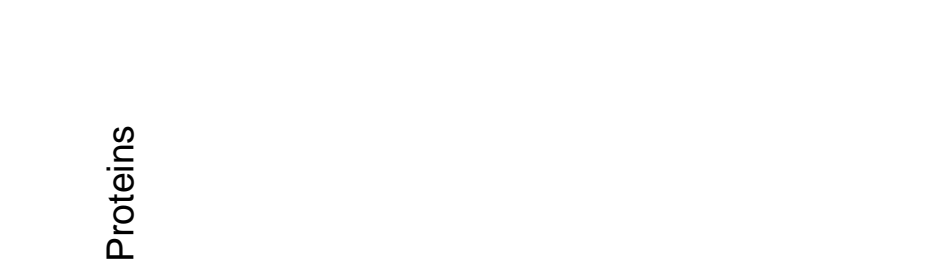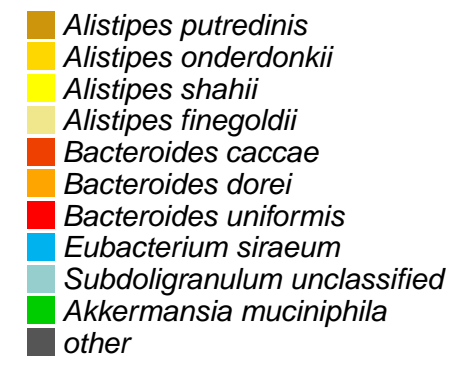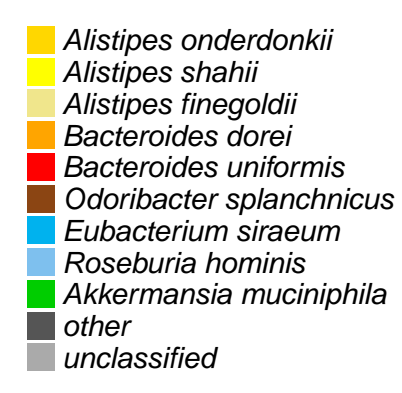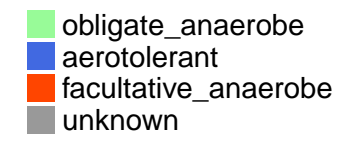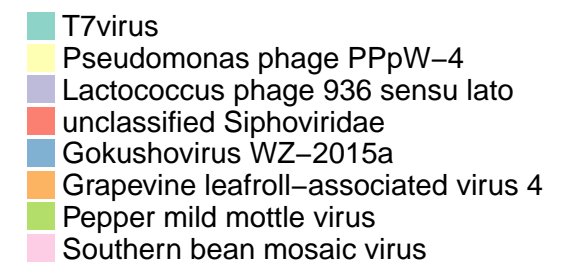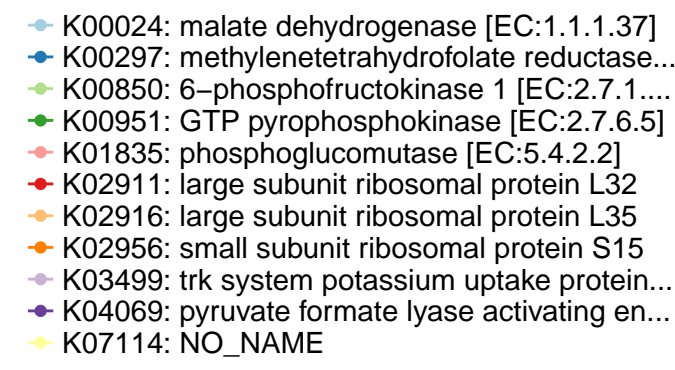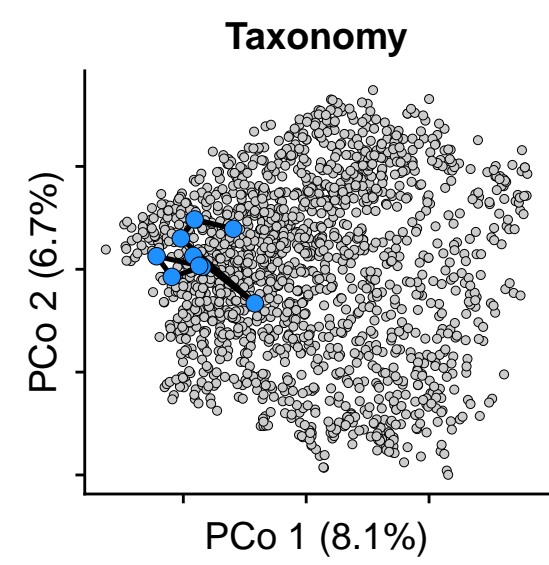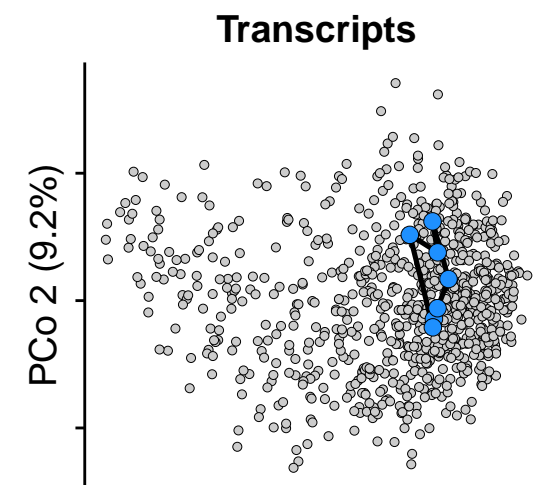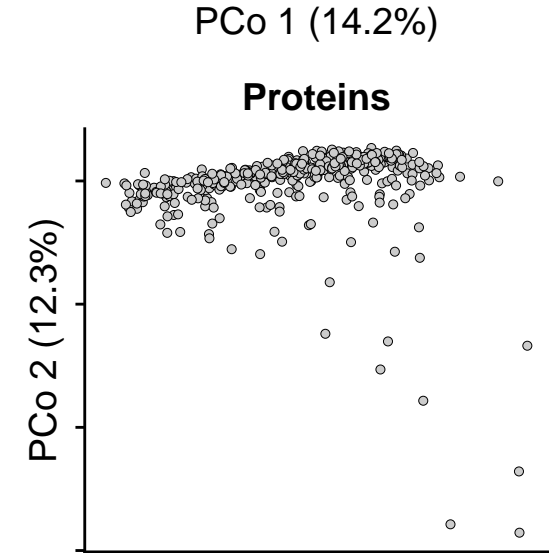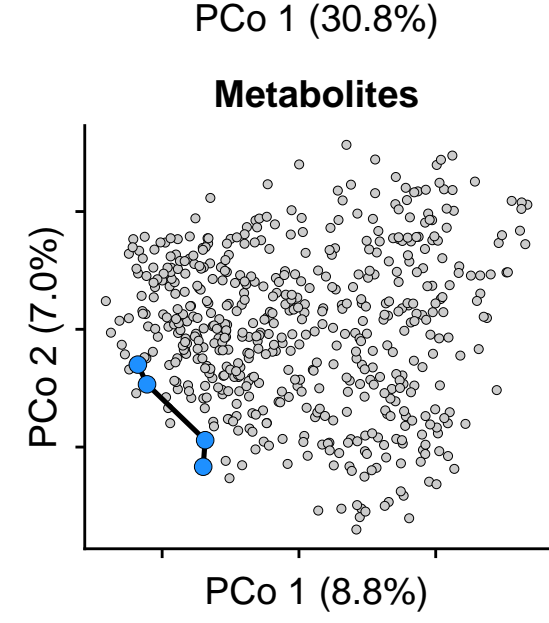

C3022: 69 Male White Cedars–Sinai | nonIBD

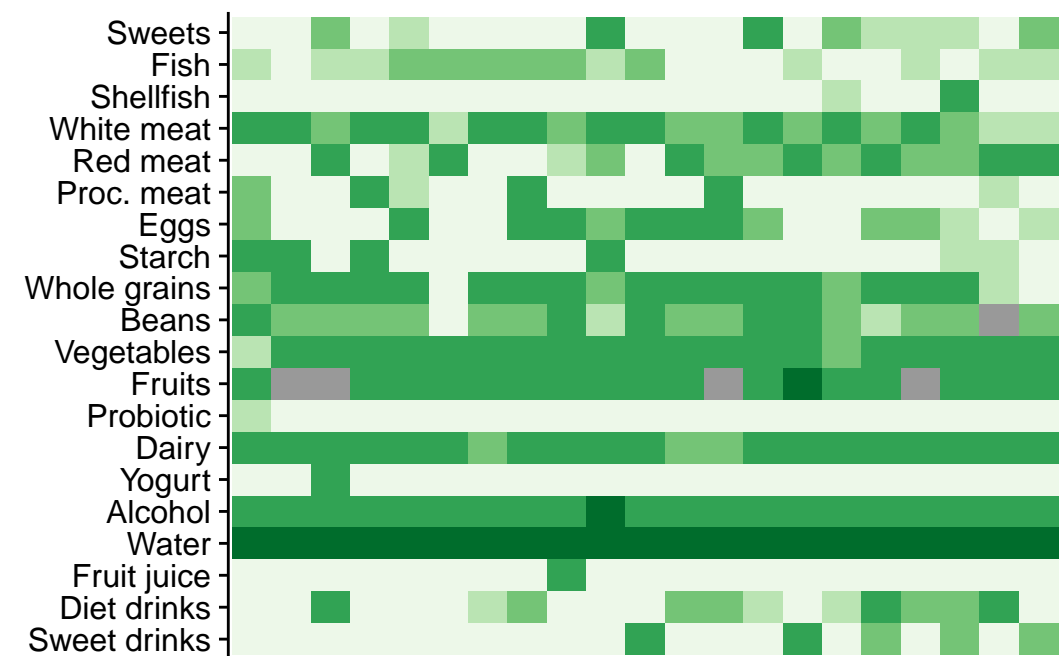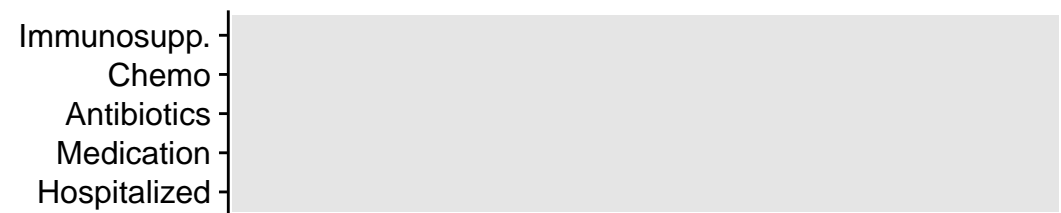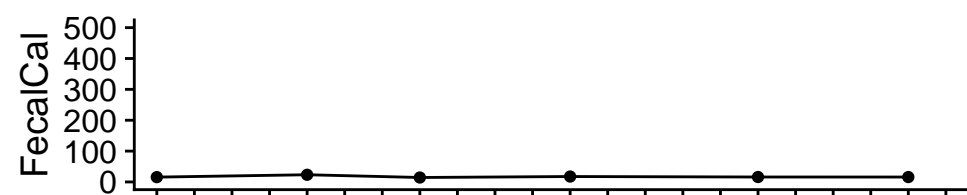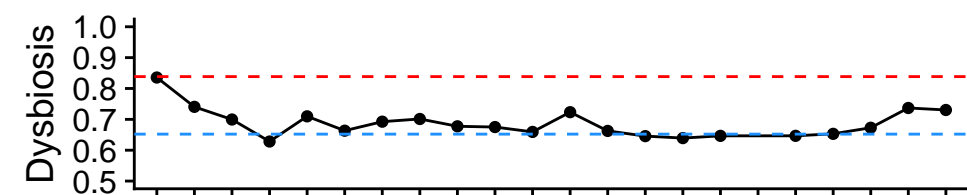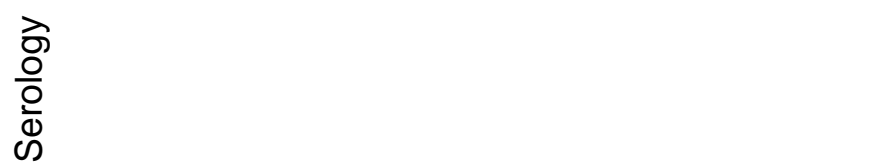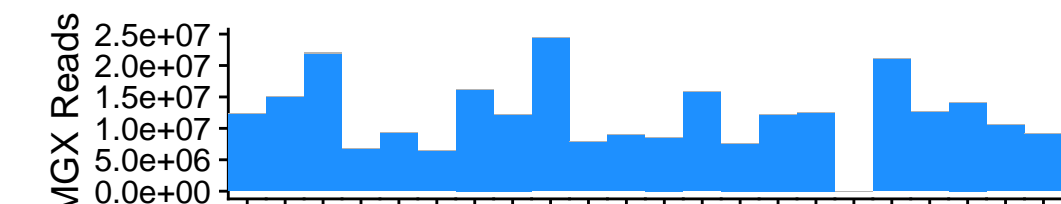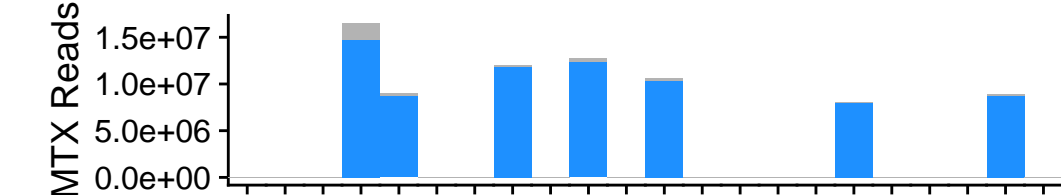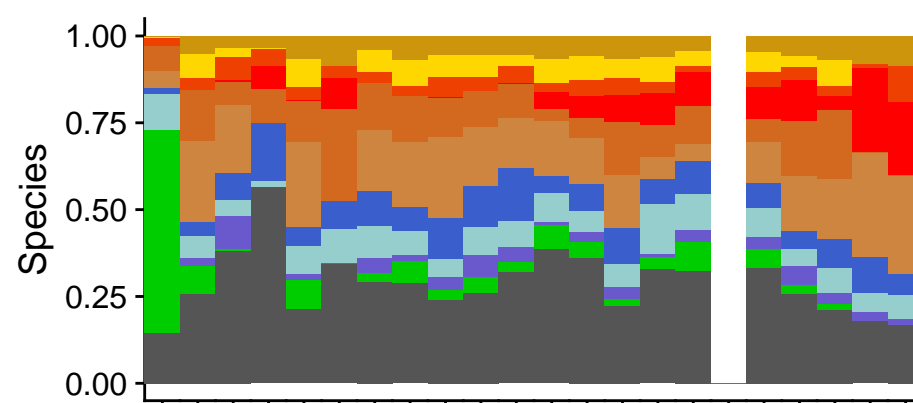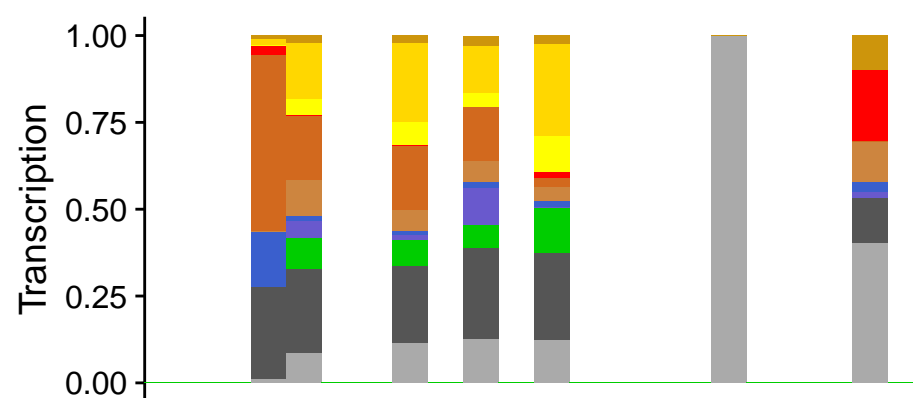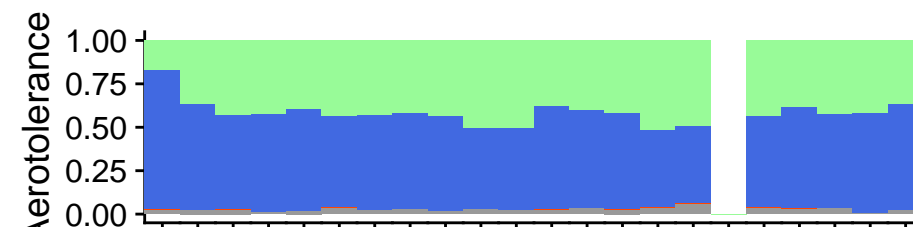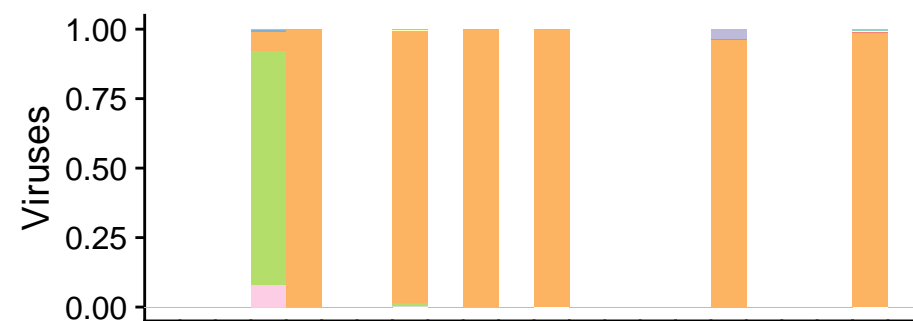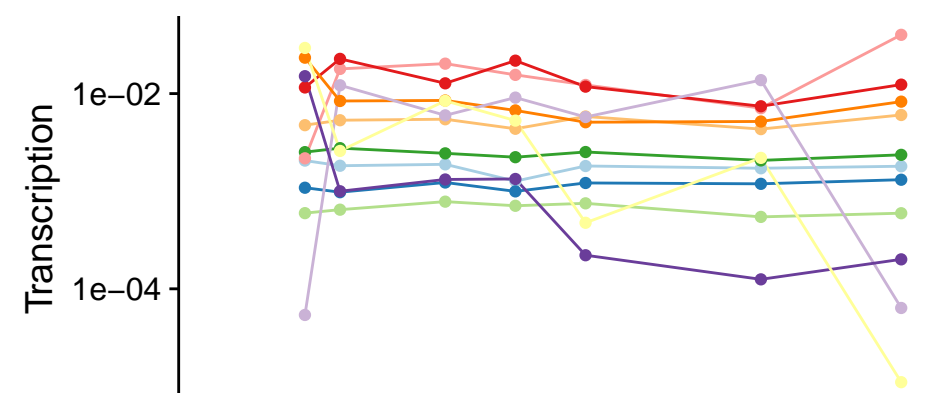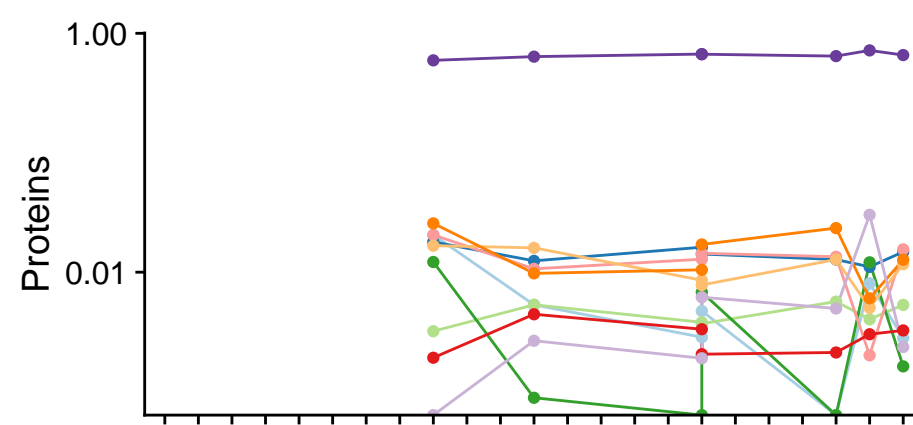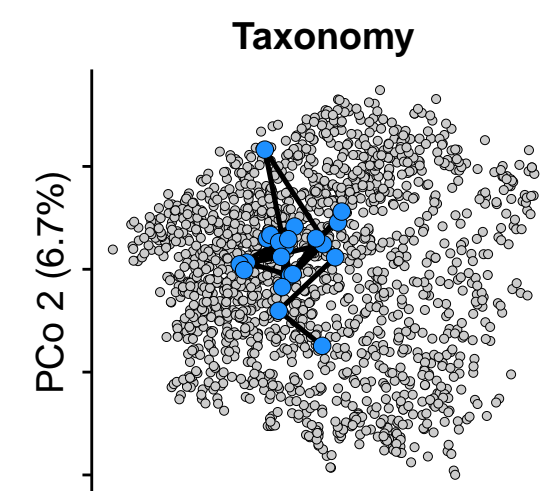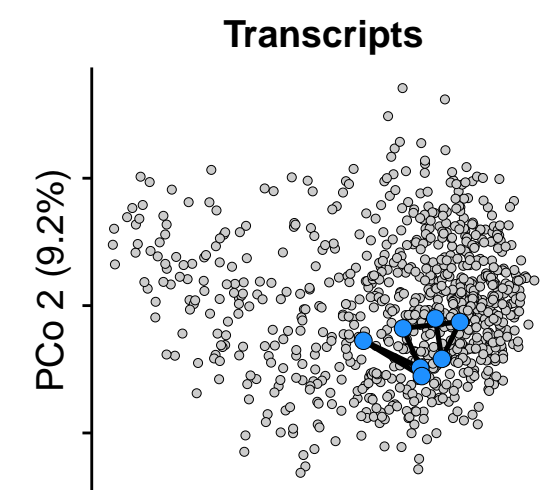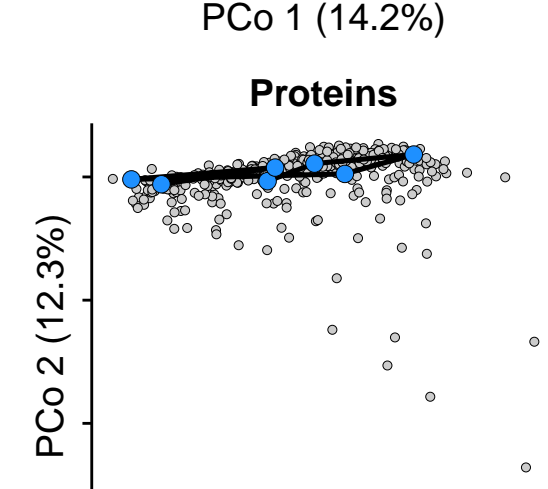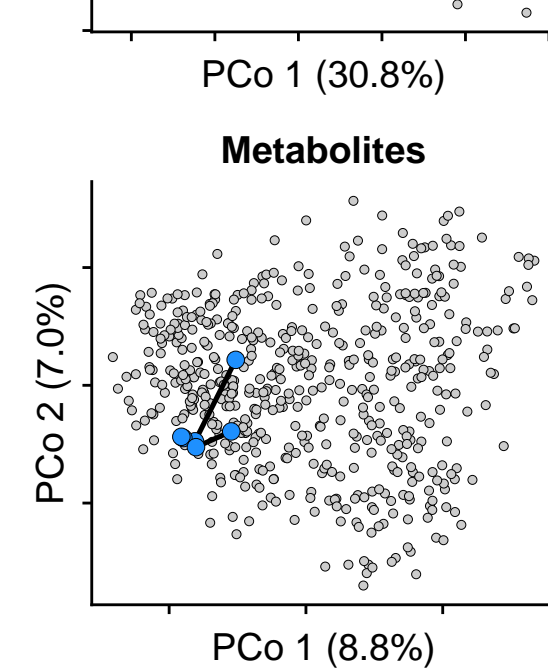

C3023: 60 Male White Cedars–Sinai | CD L3

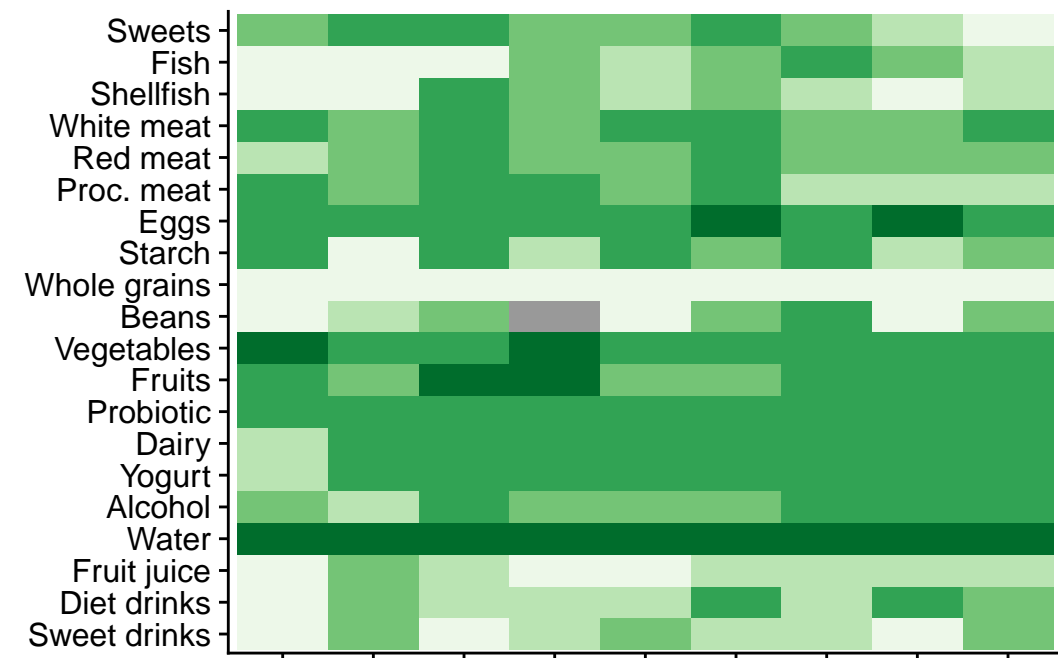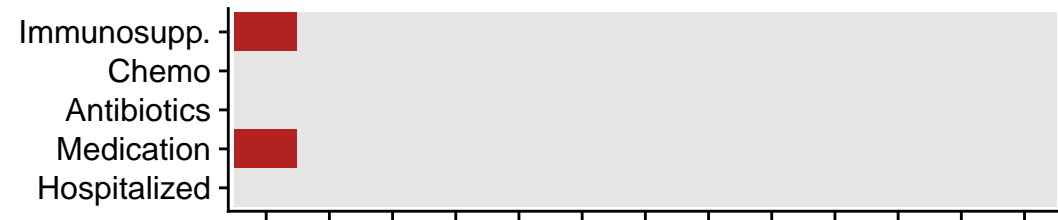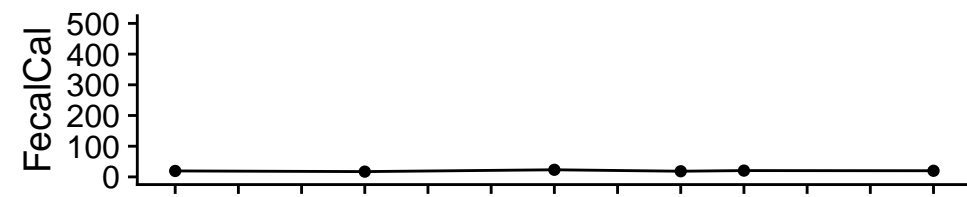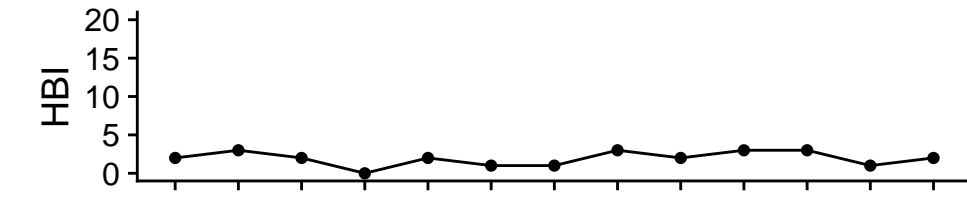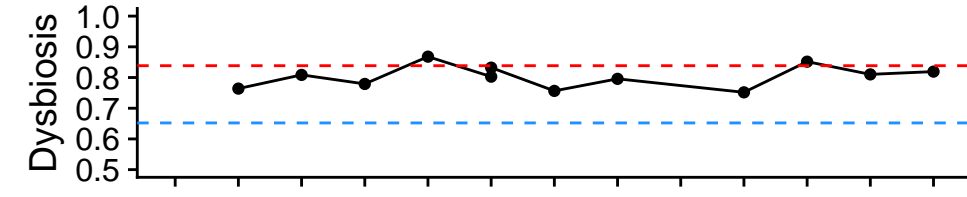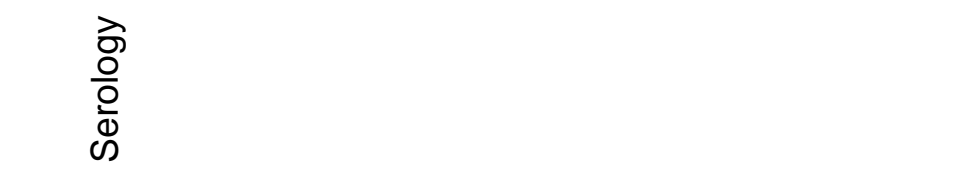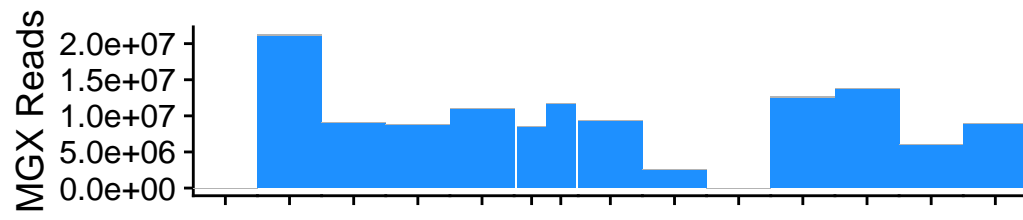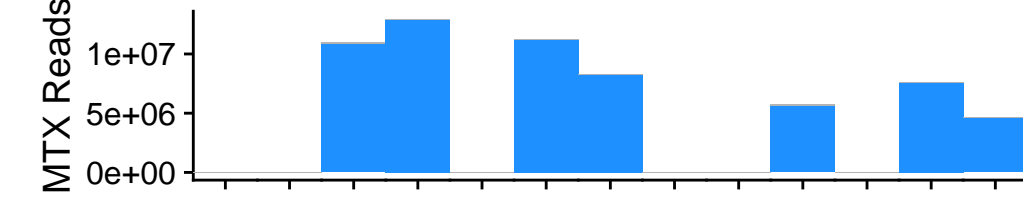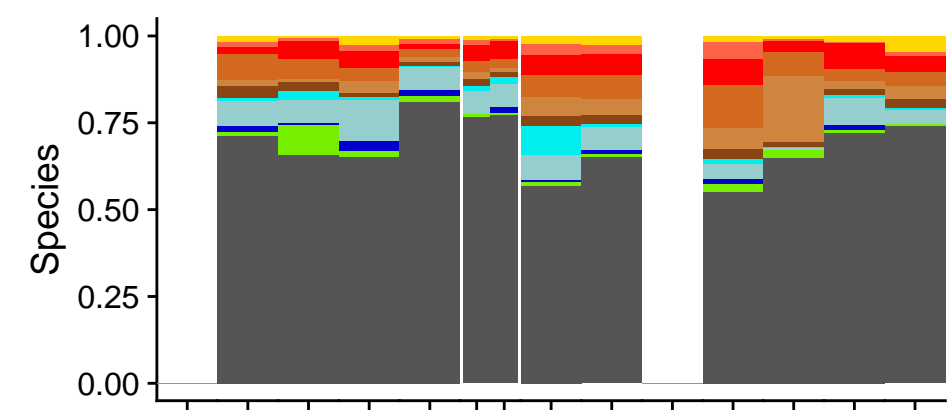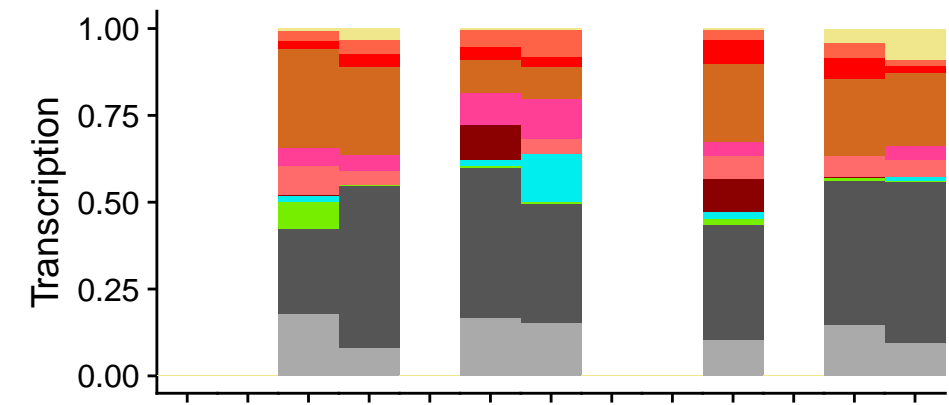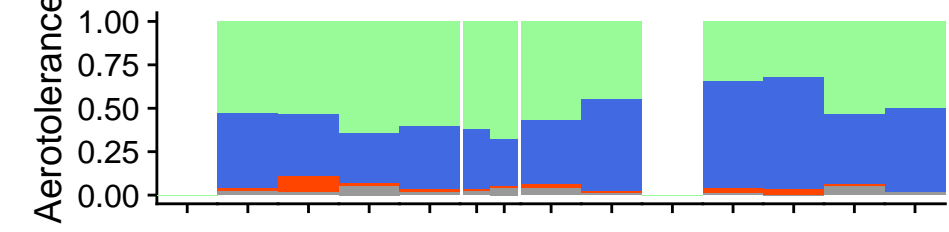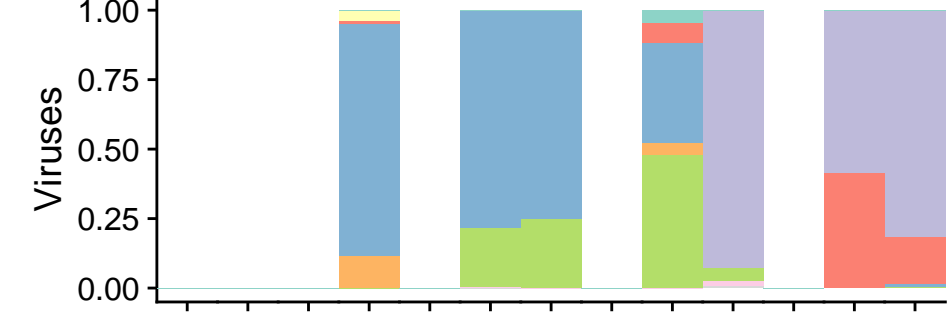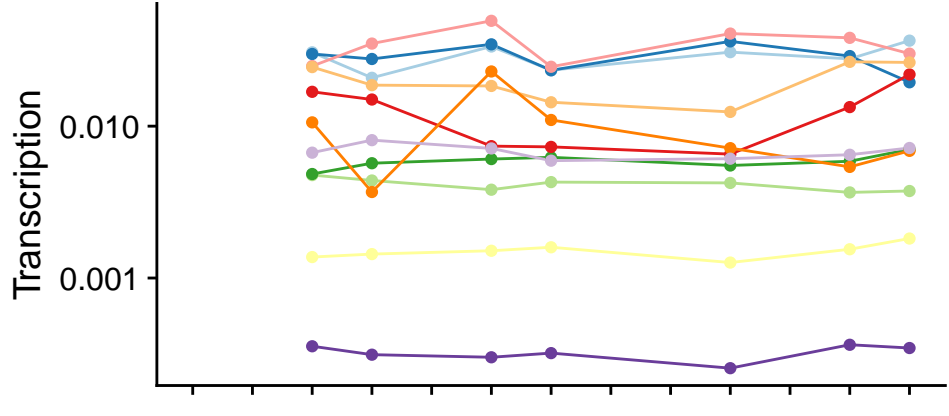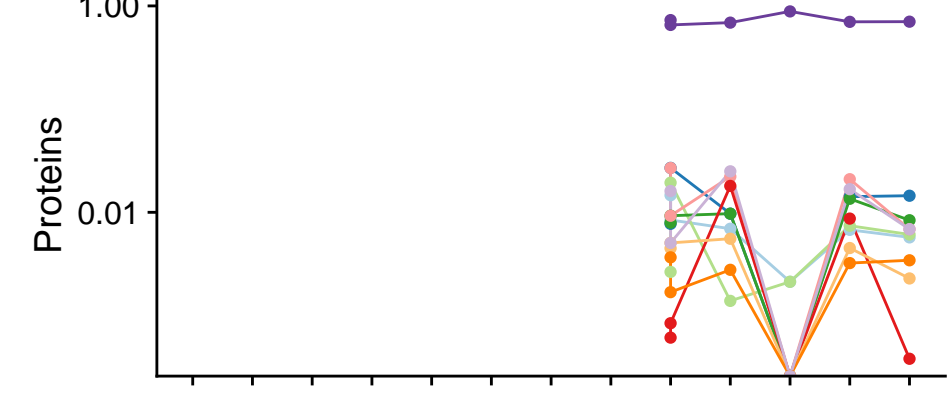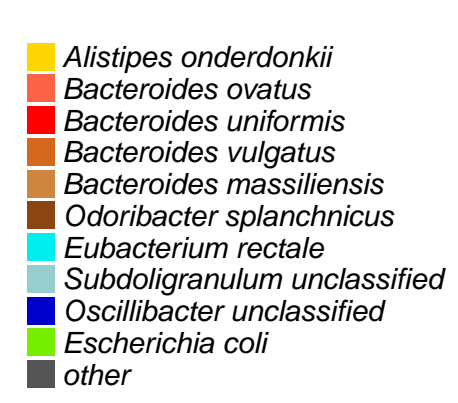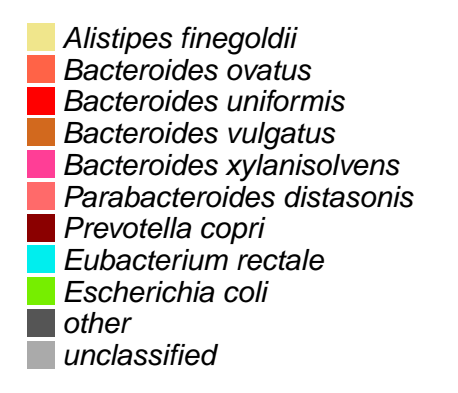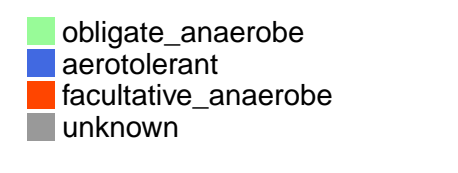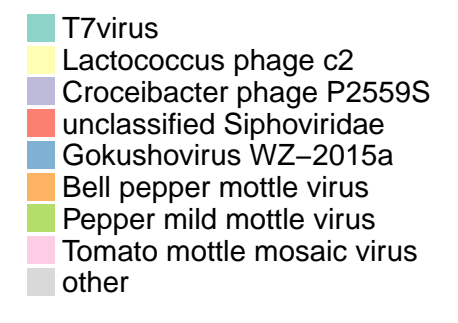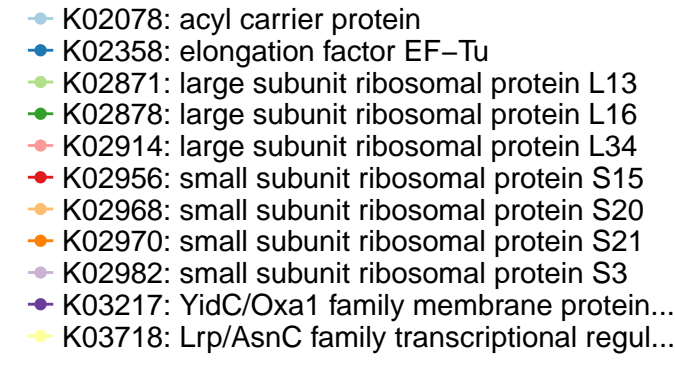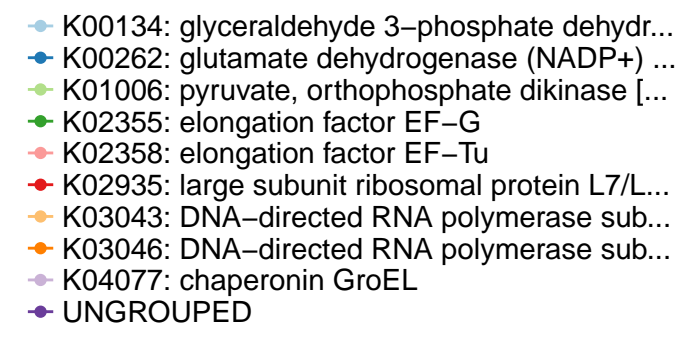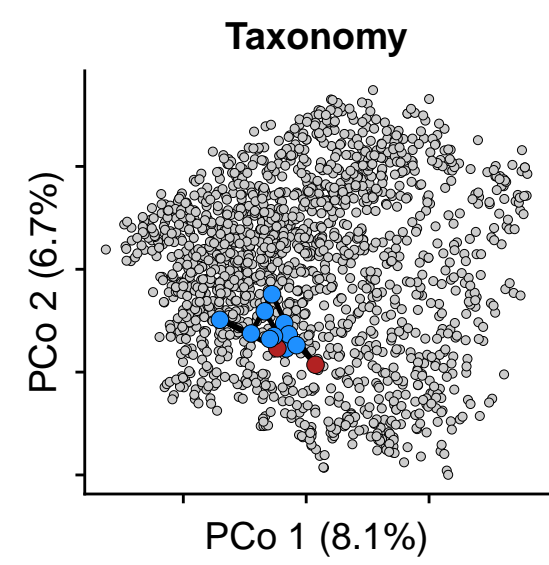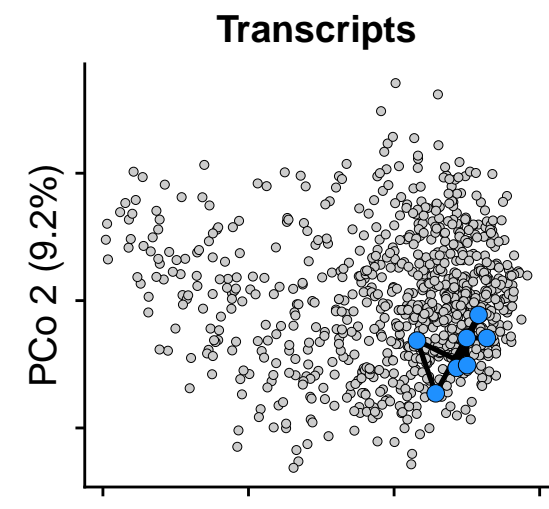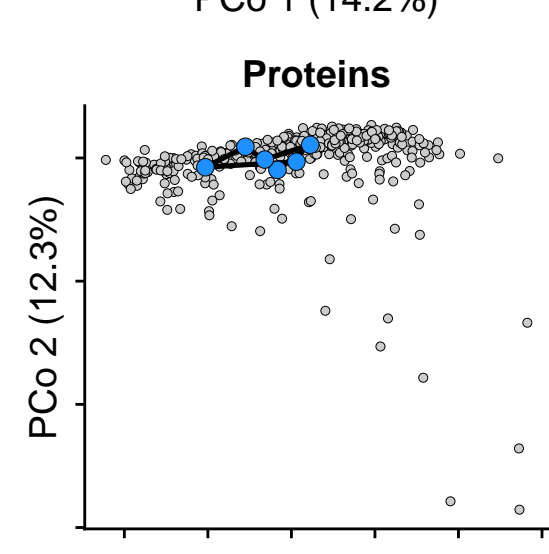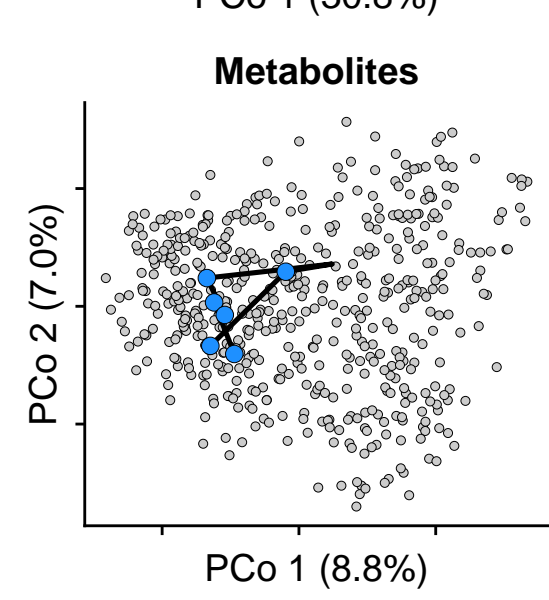

C3027: 36 Female White Cedars–Sinai | CD

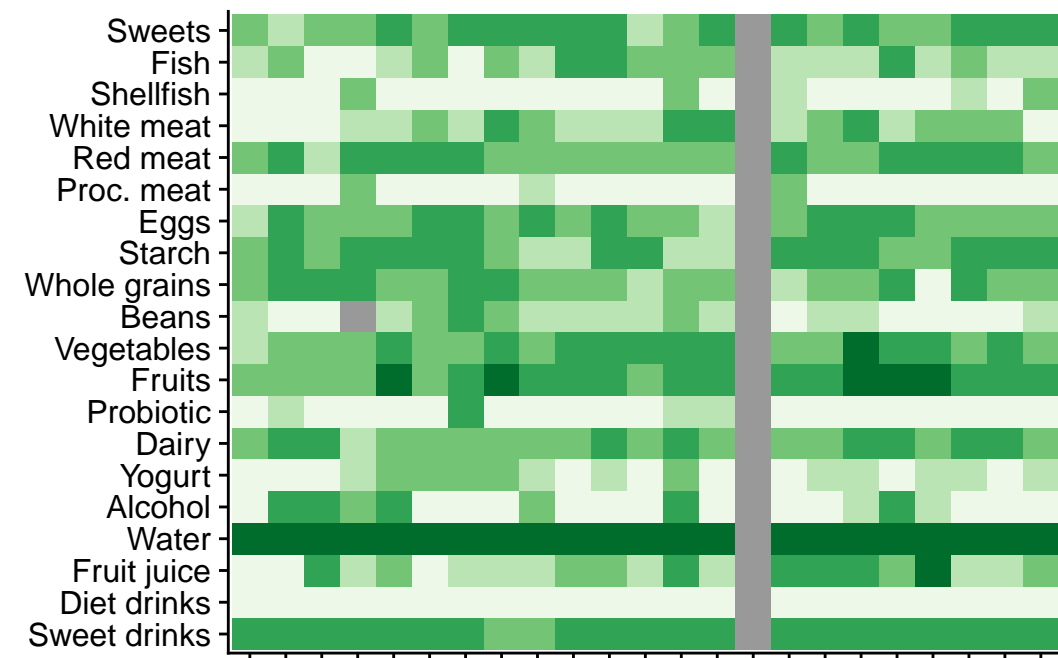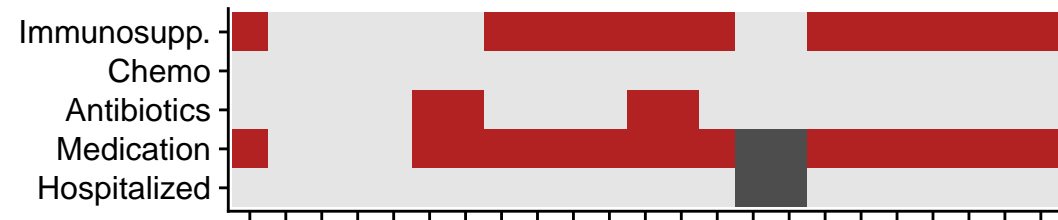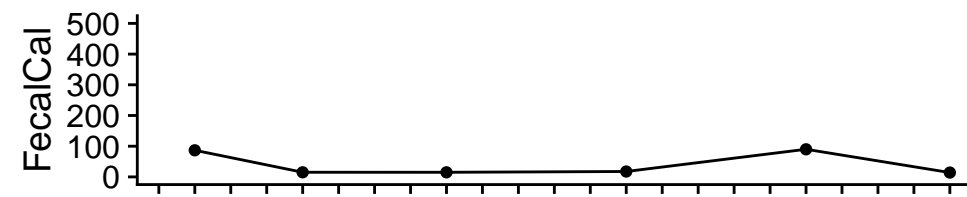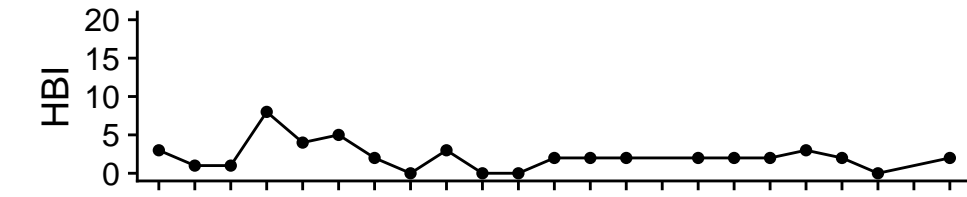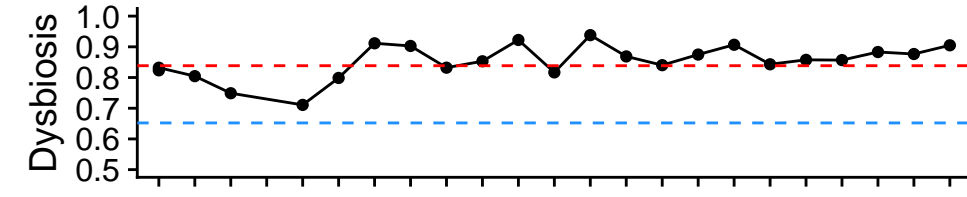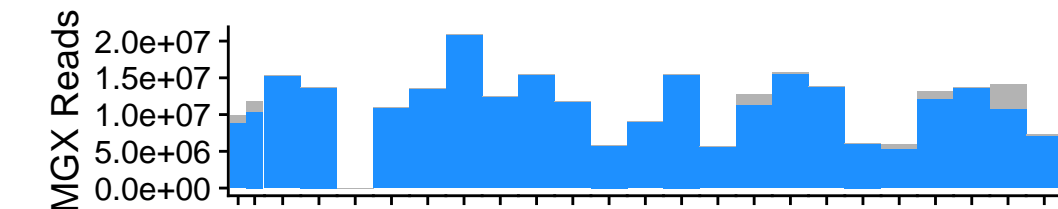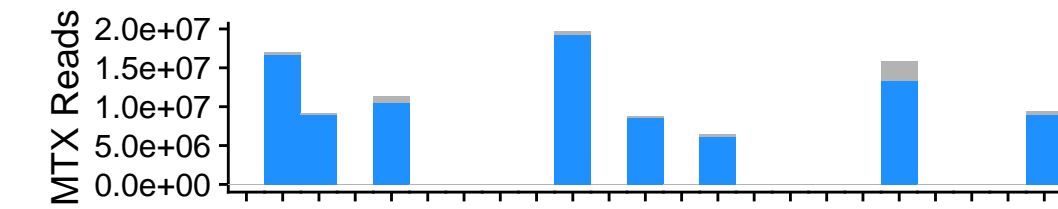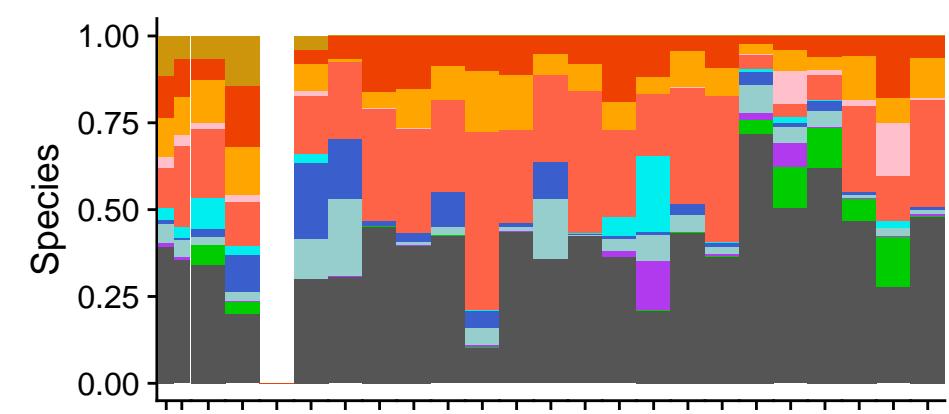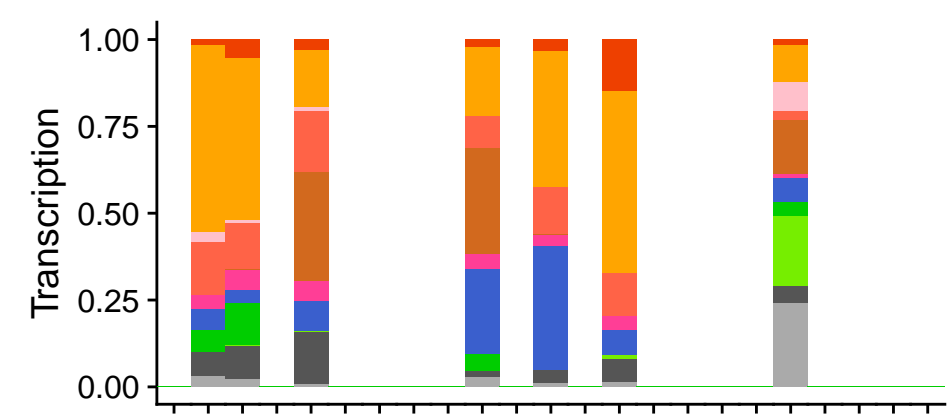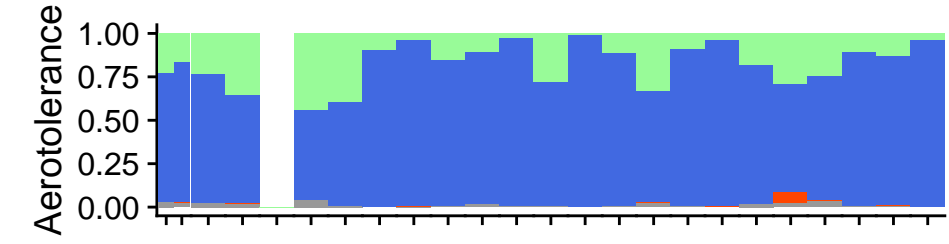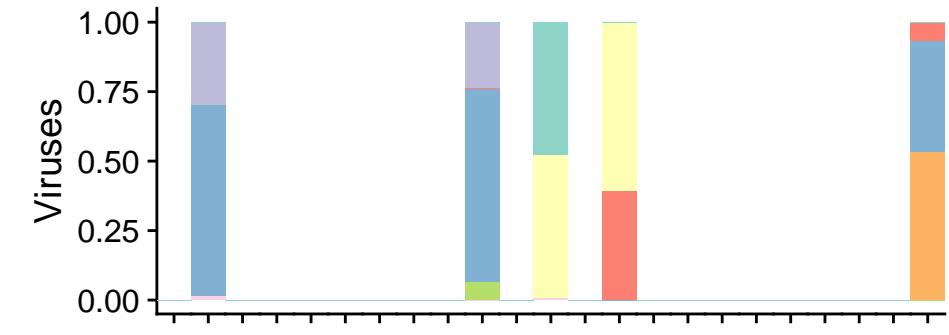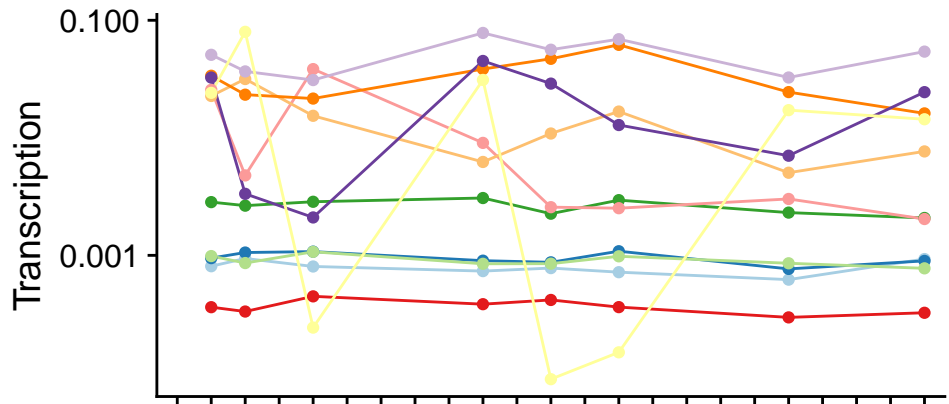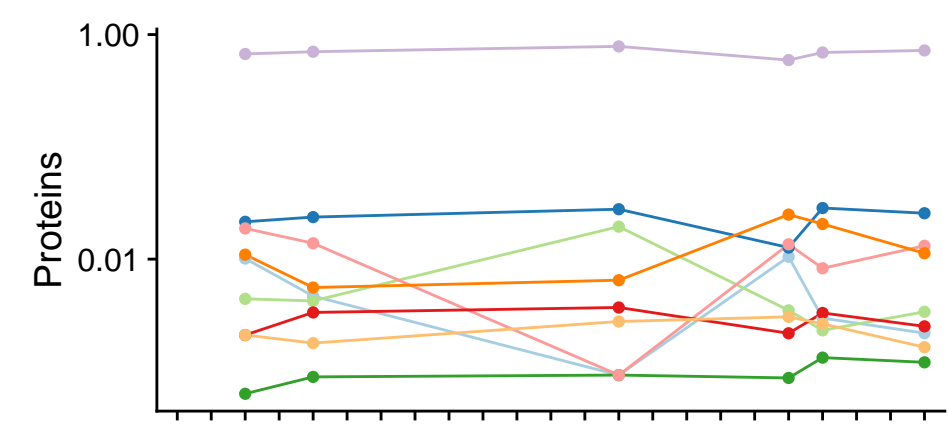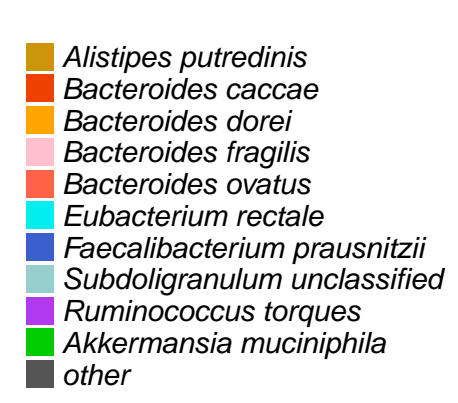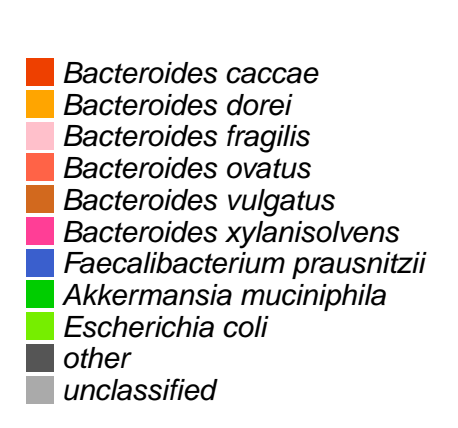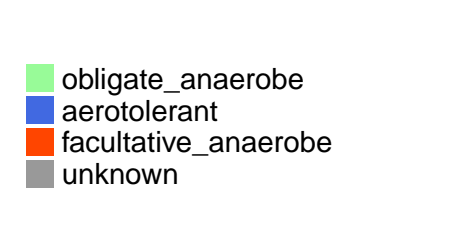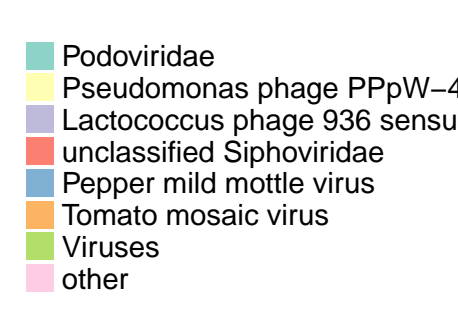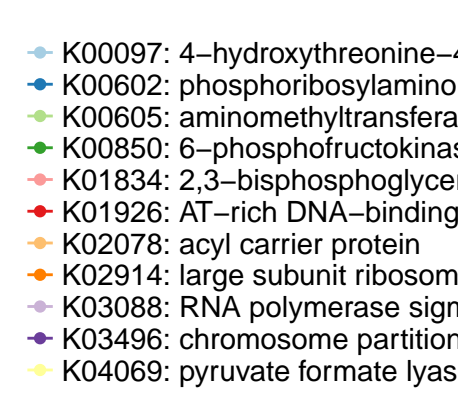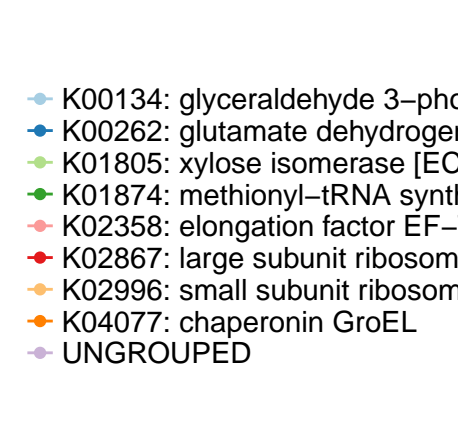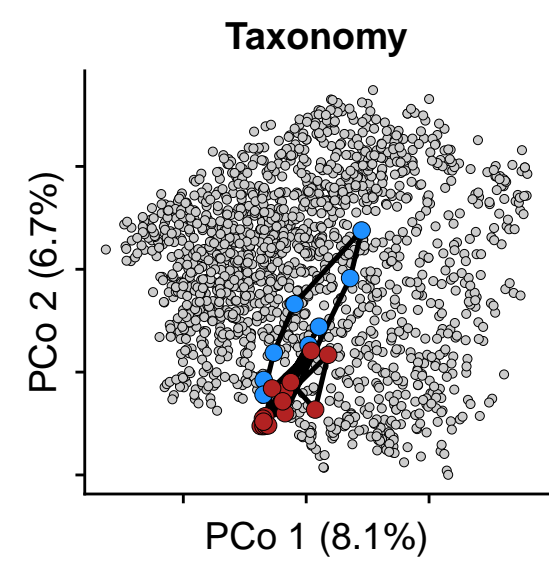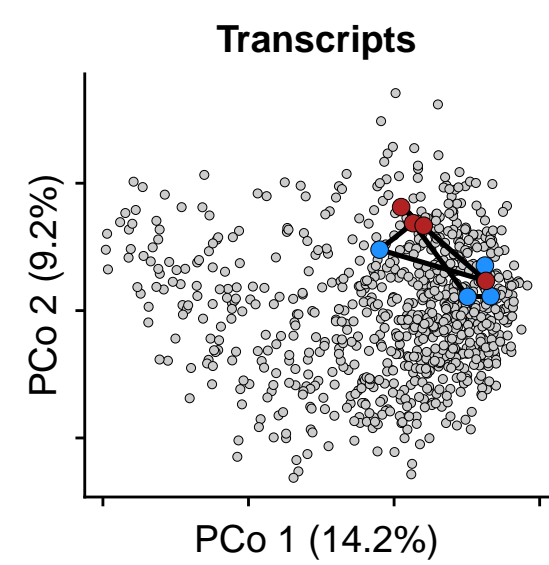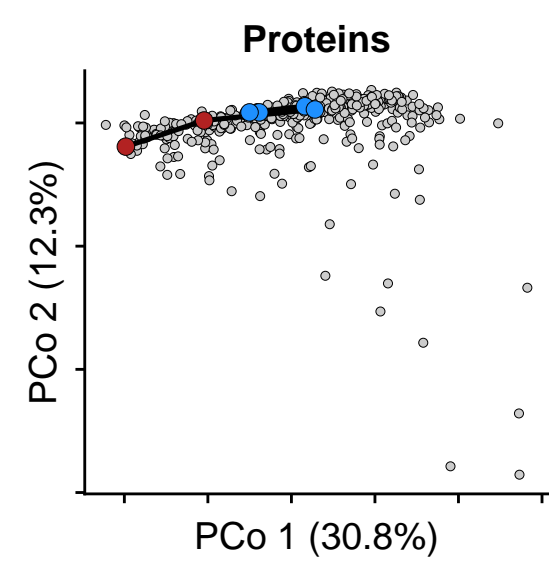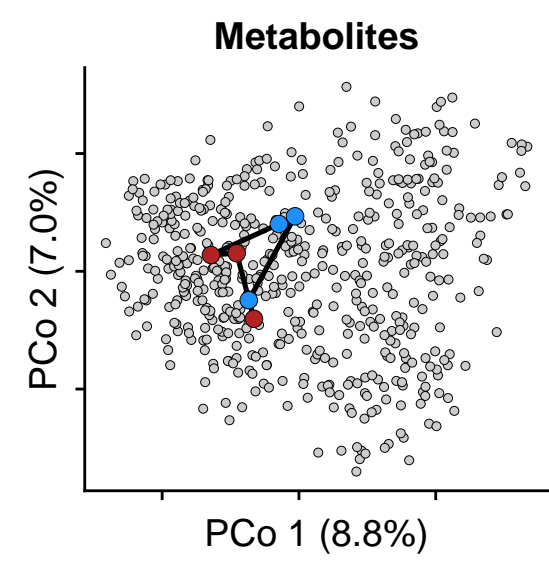

C3028: 33 Male White Cedars-Sinai | CD

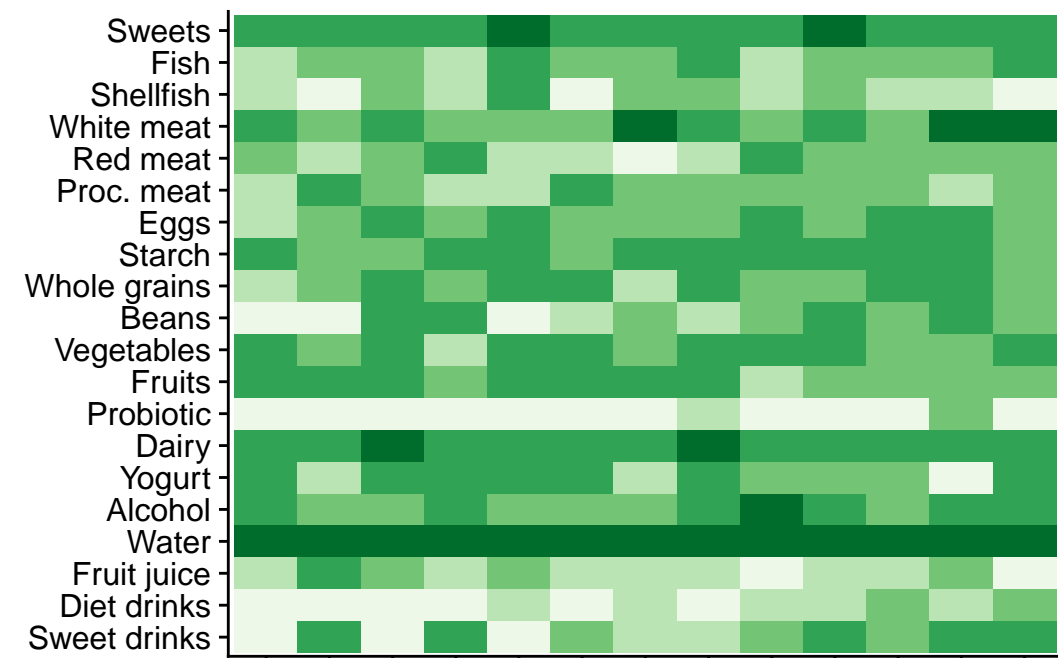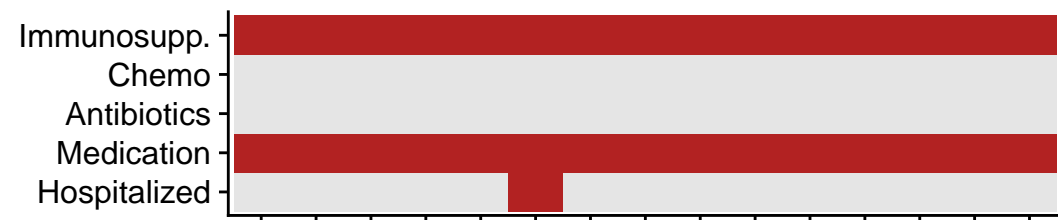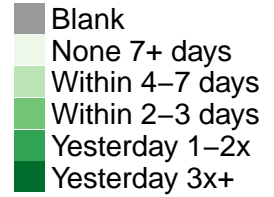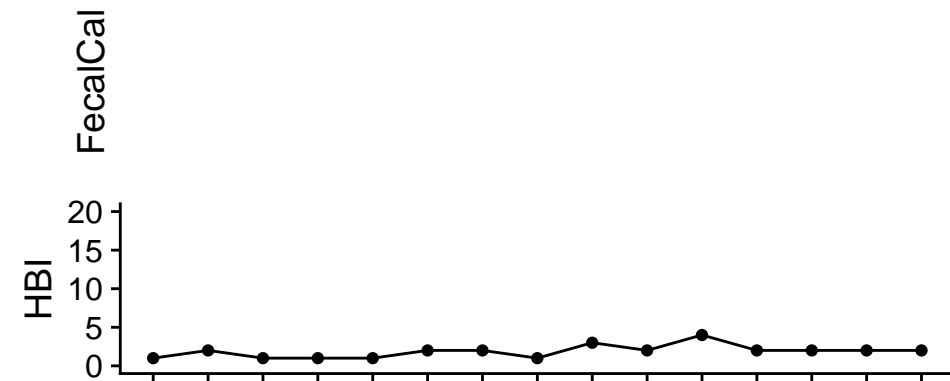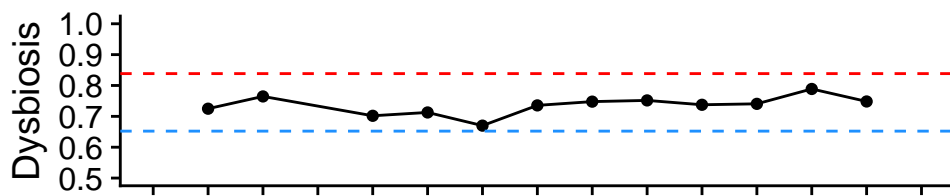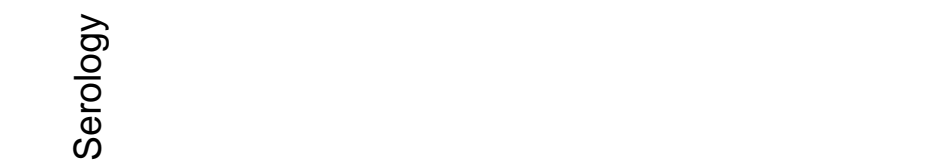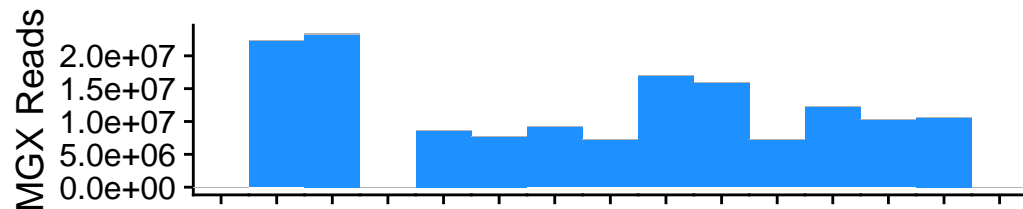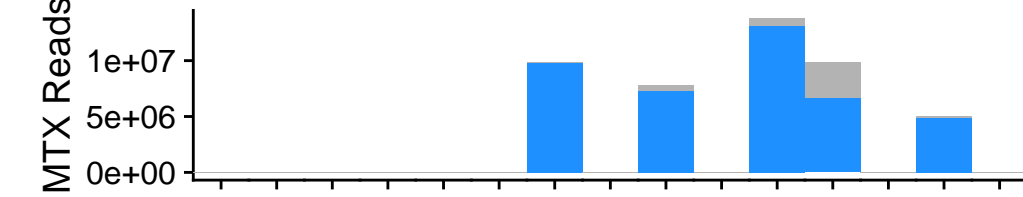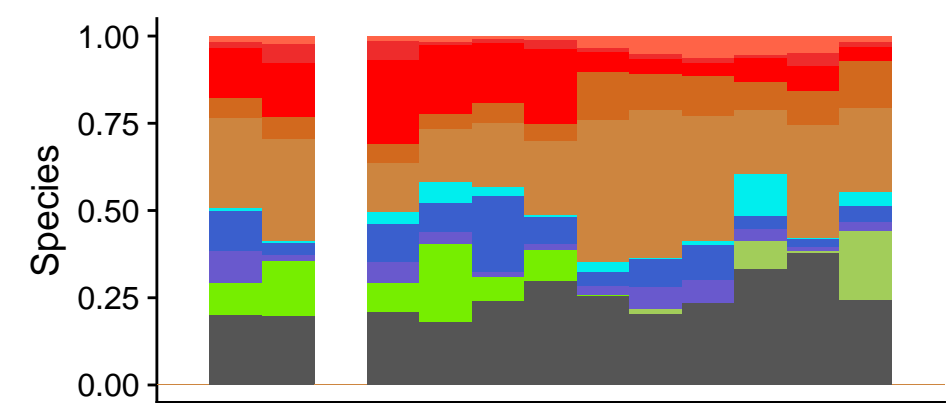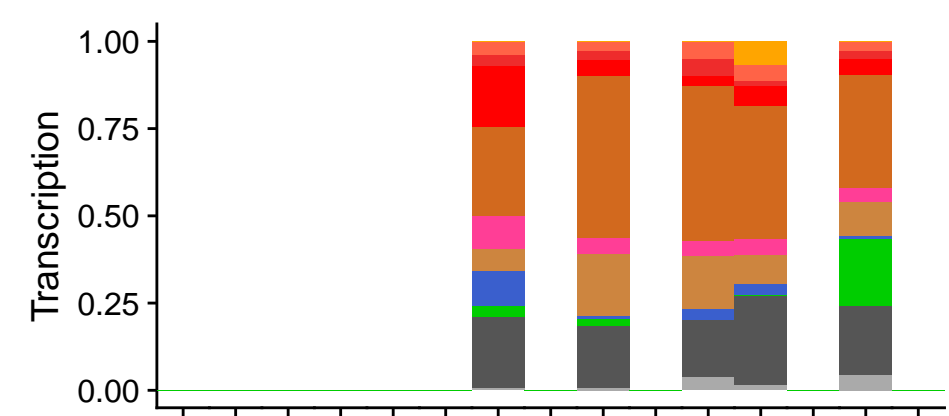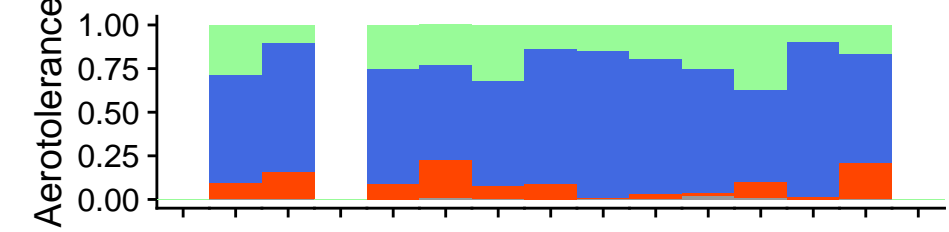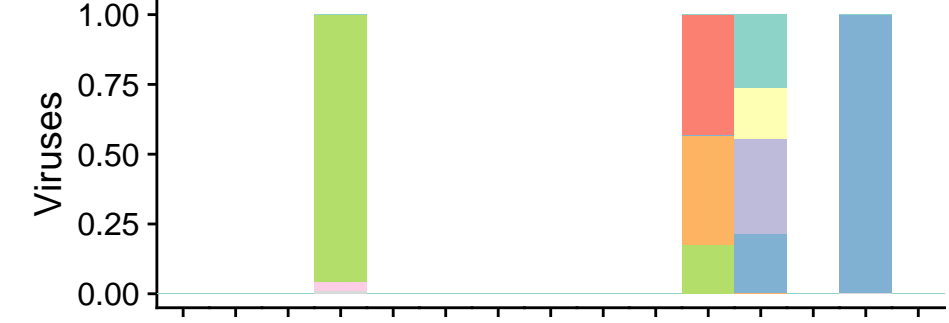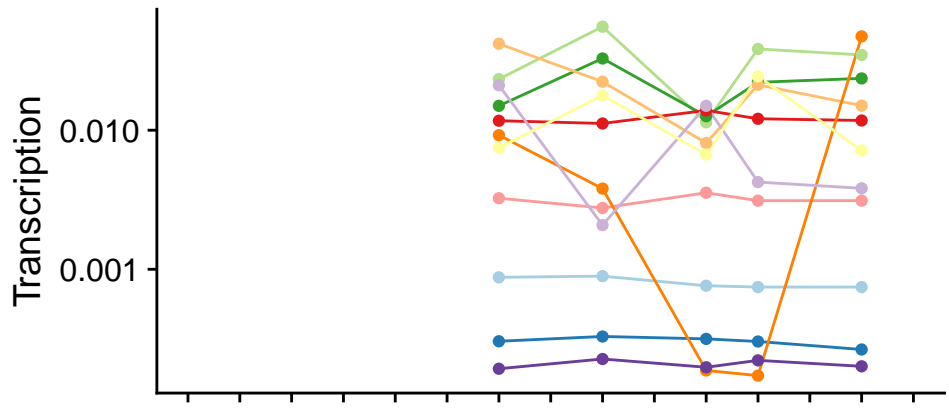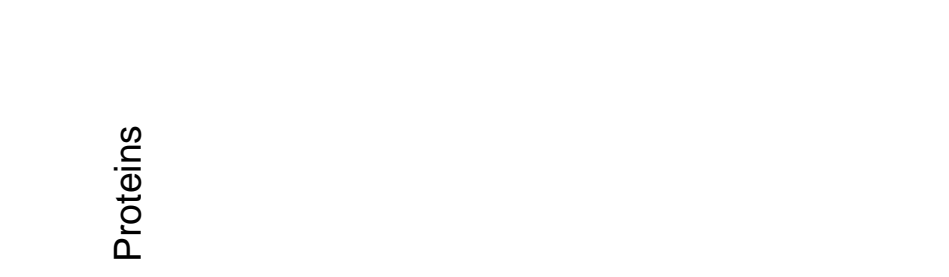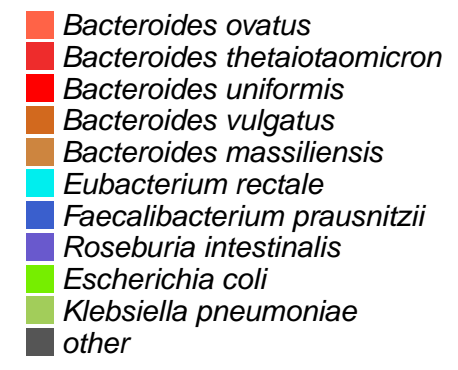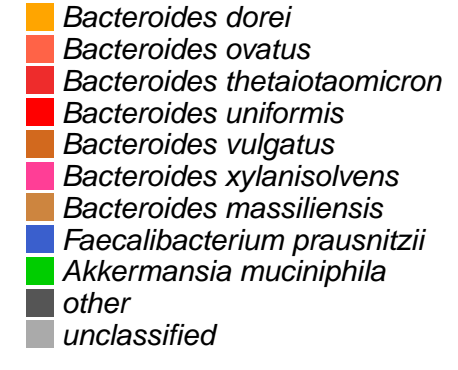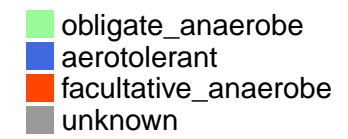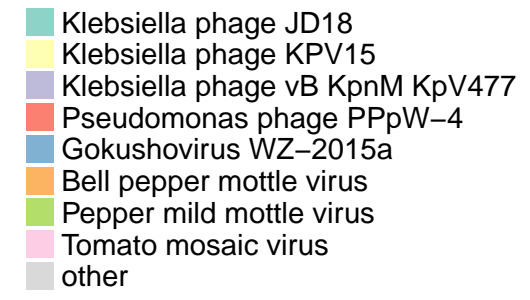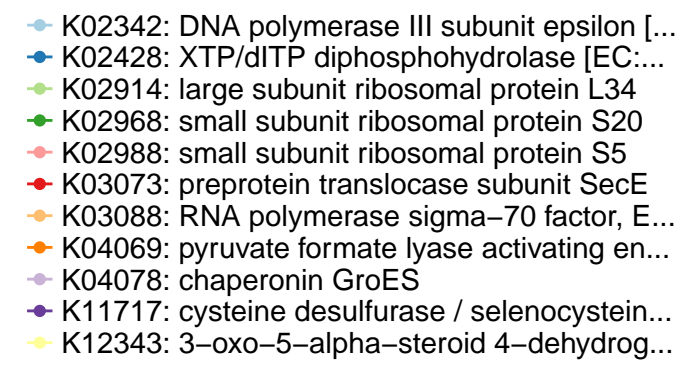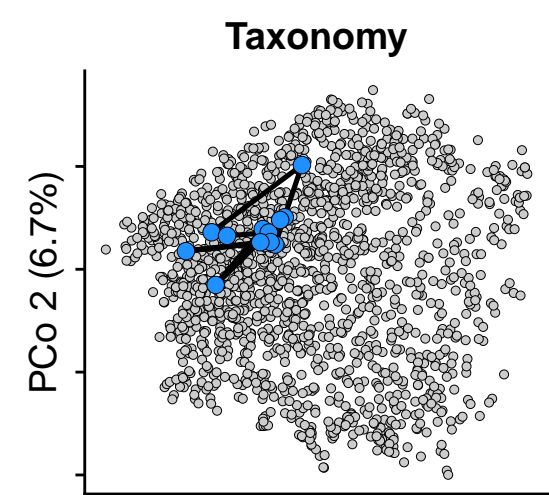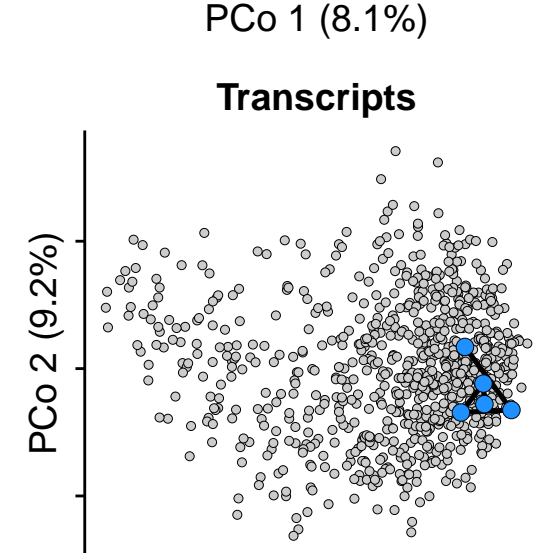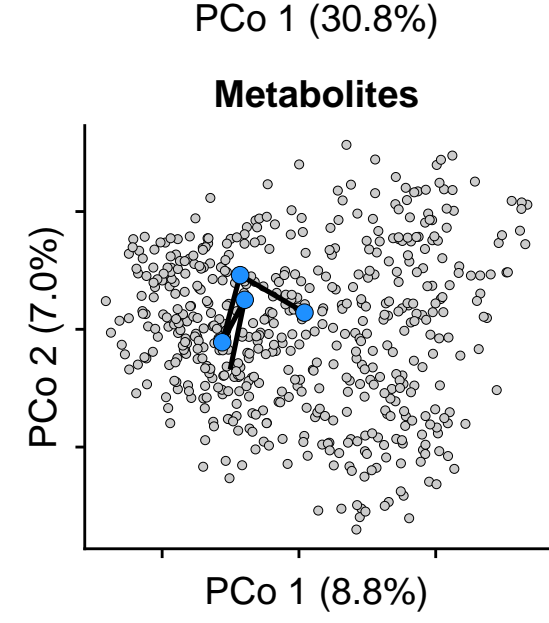

C3029: 32 Male White Cedars–Sinai | UC

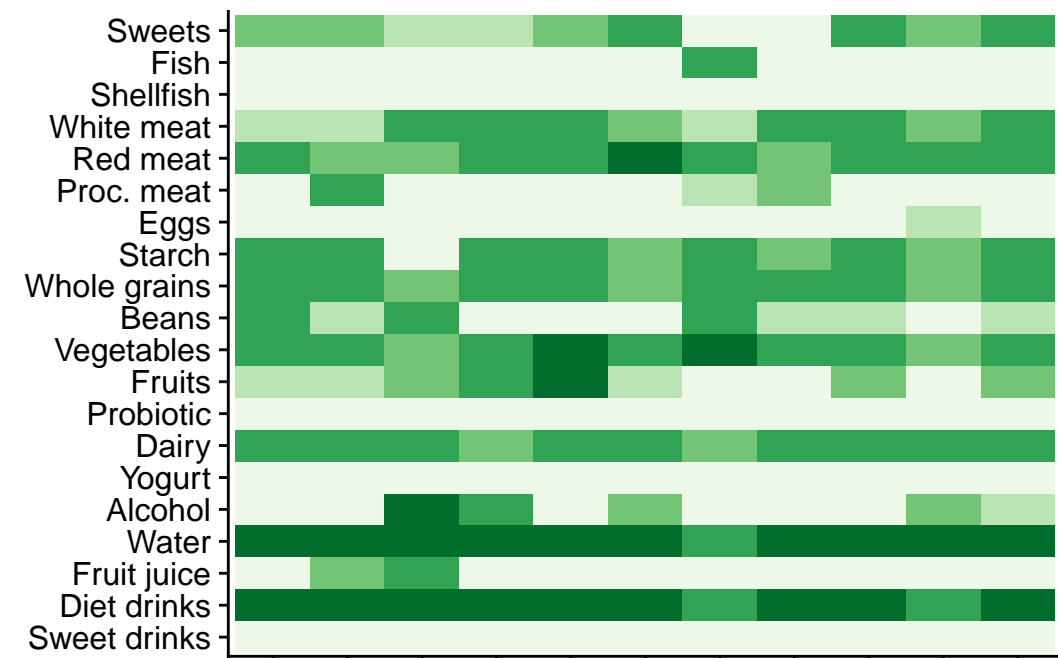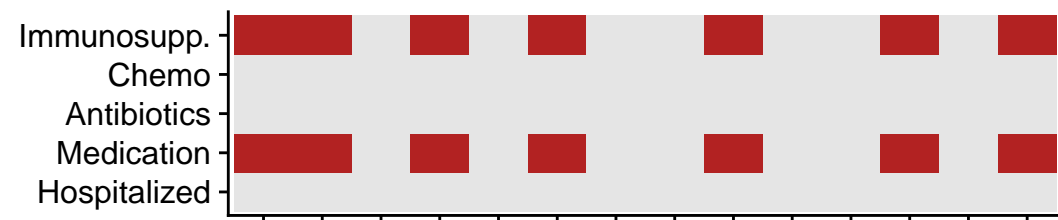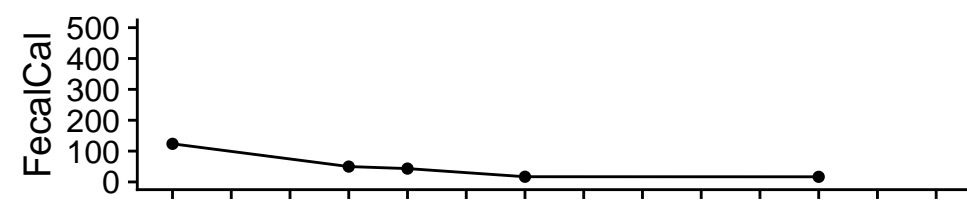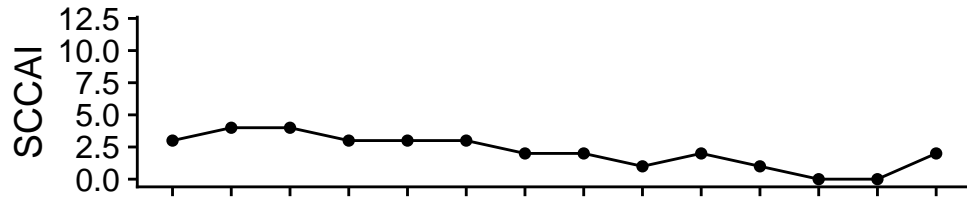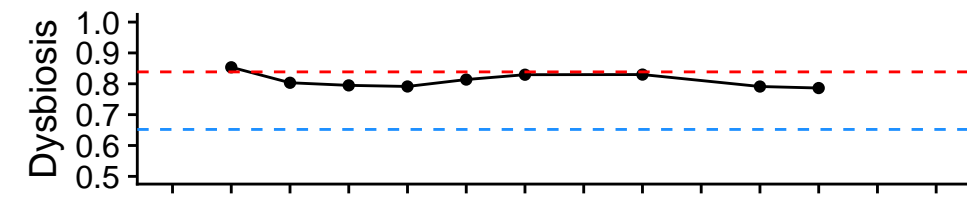

Serology

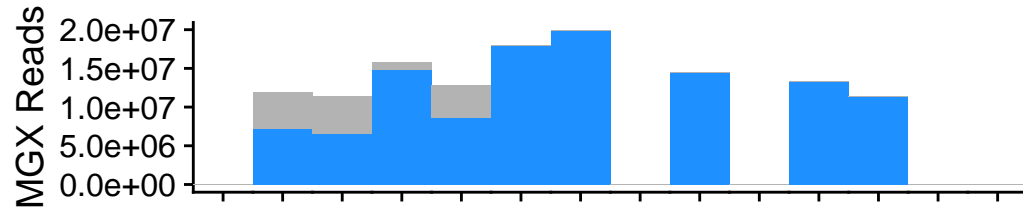

MTX Reads

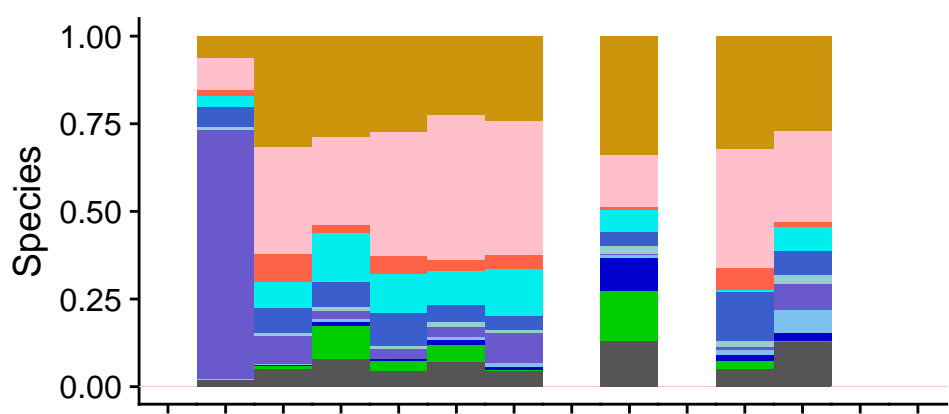

Transcription

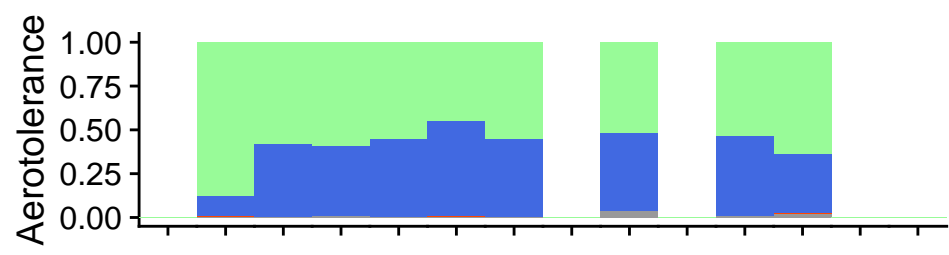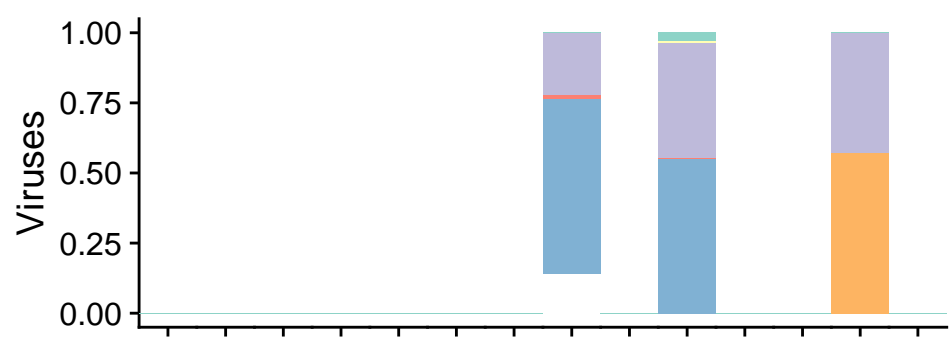

Transcription

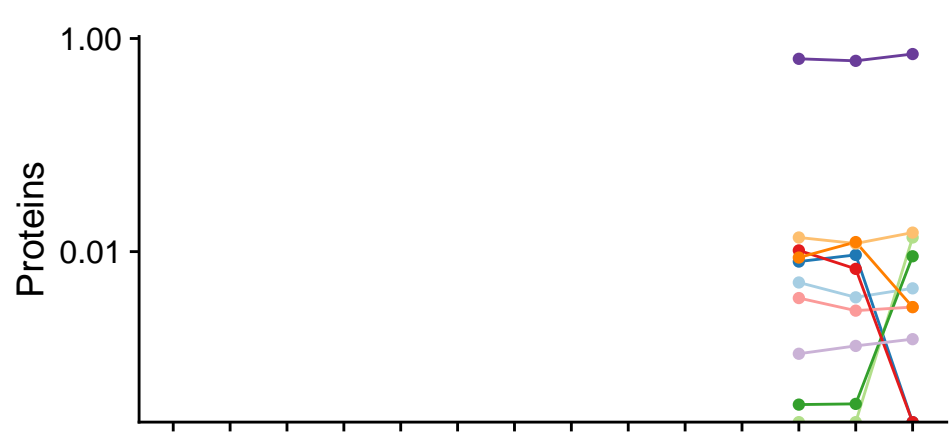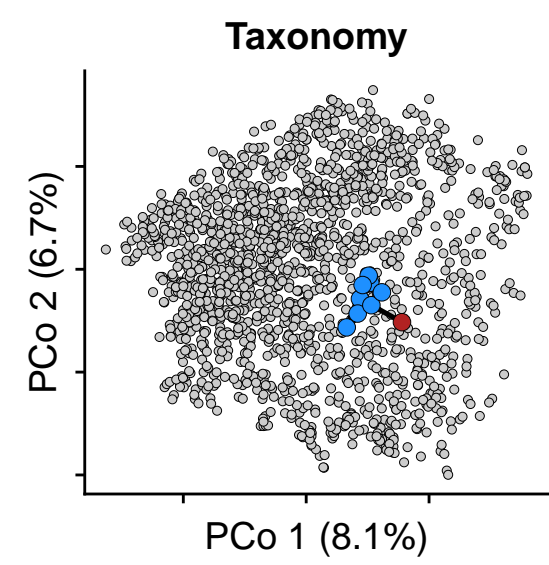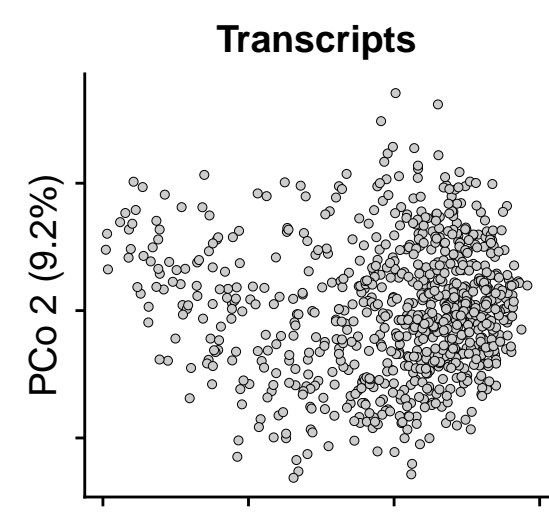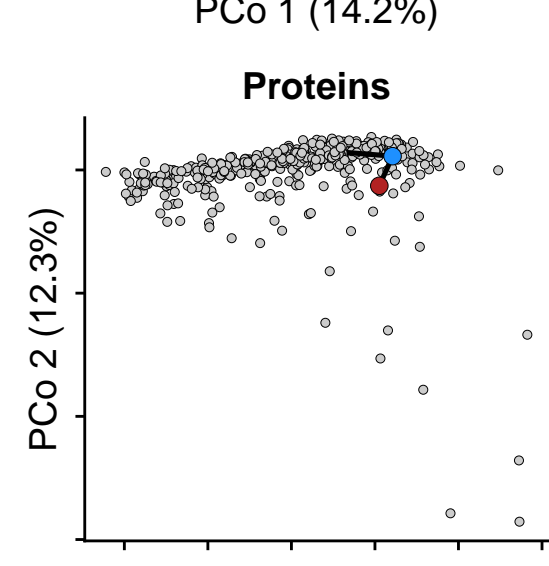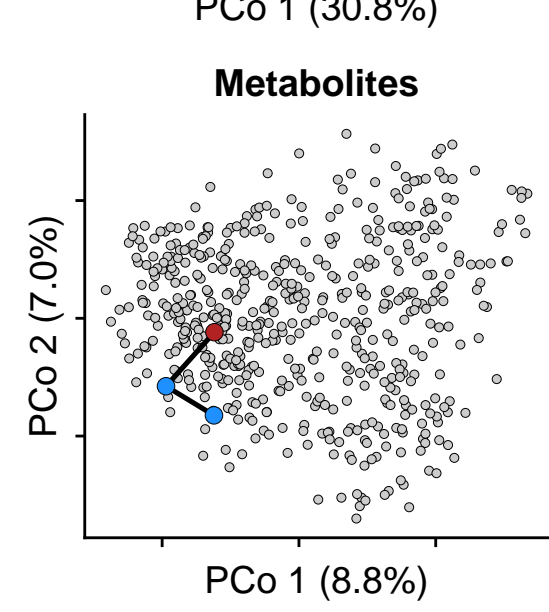

C3030: 44 Male White Cedars–Sinai | CD L2

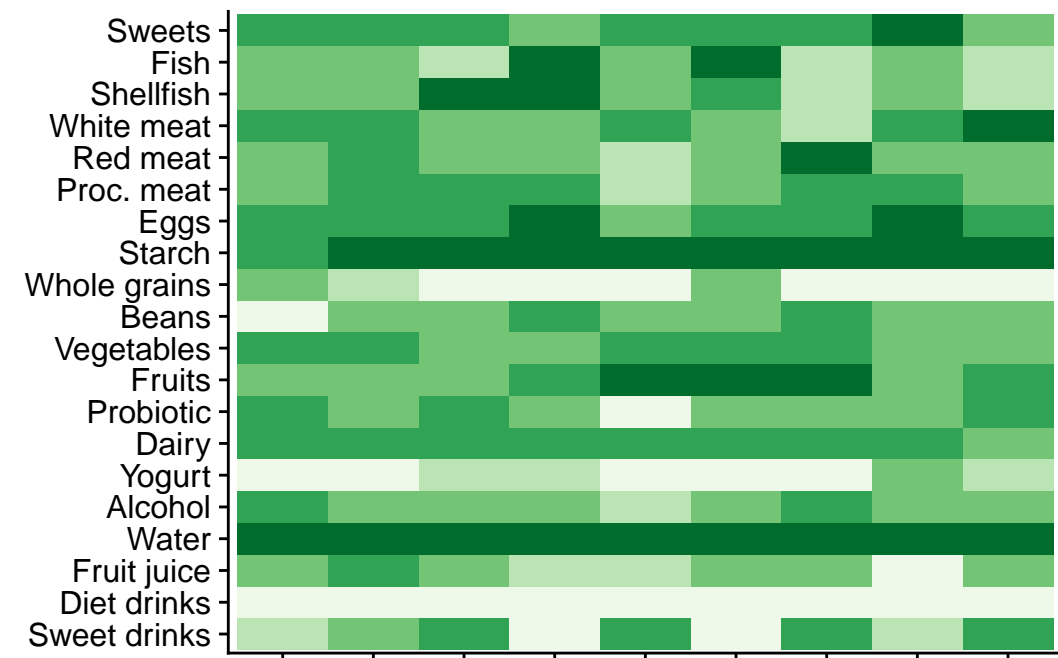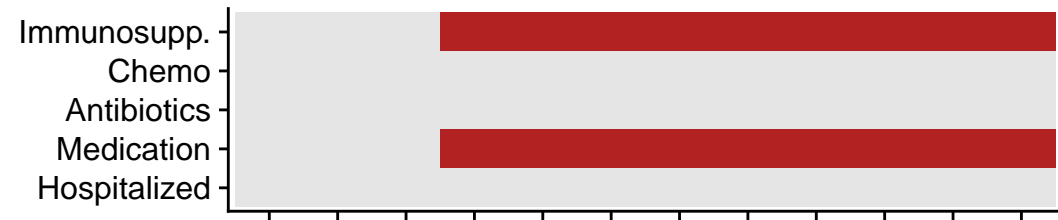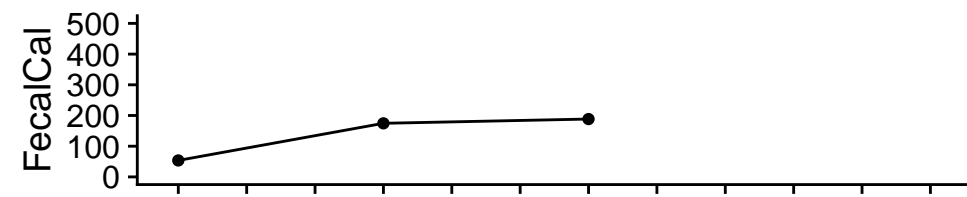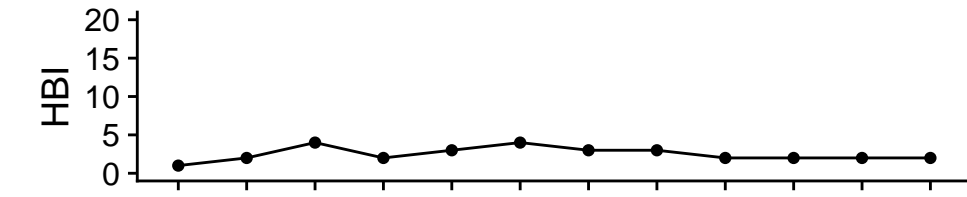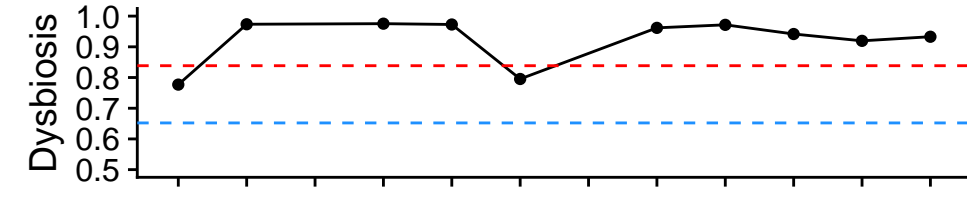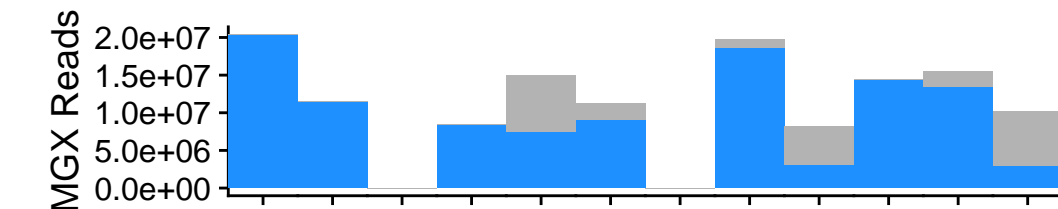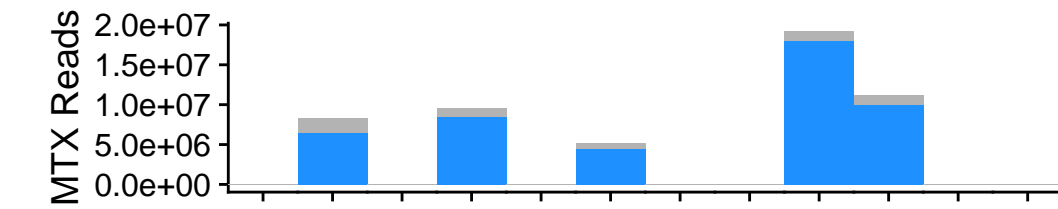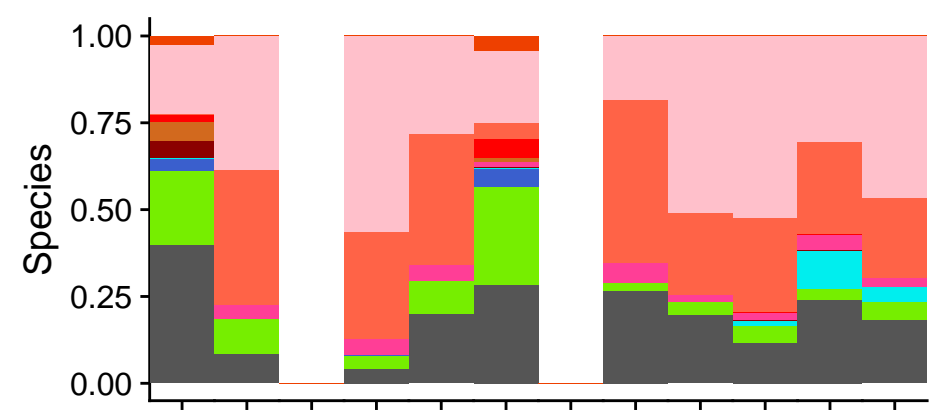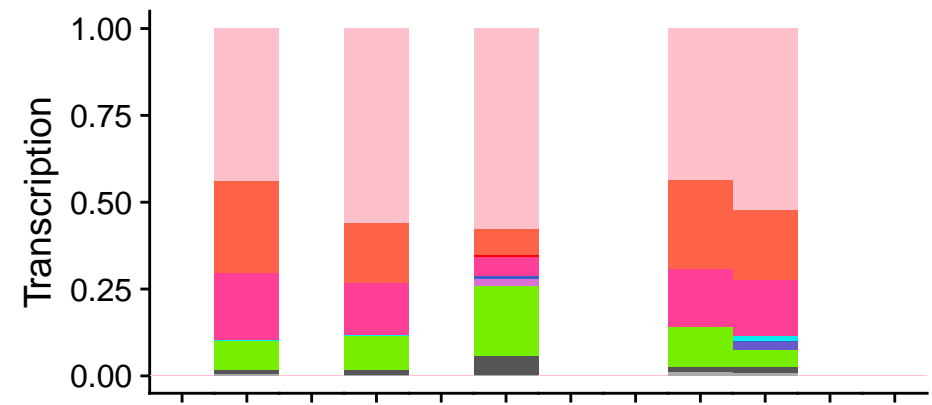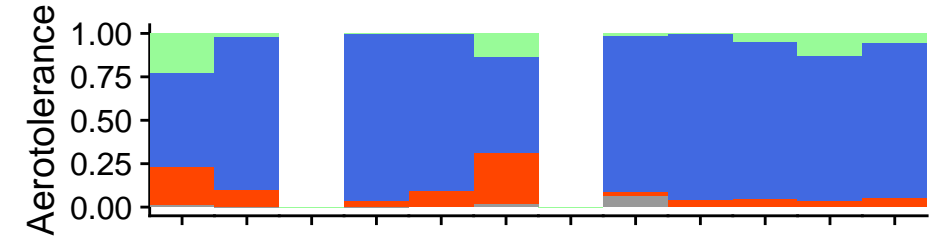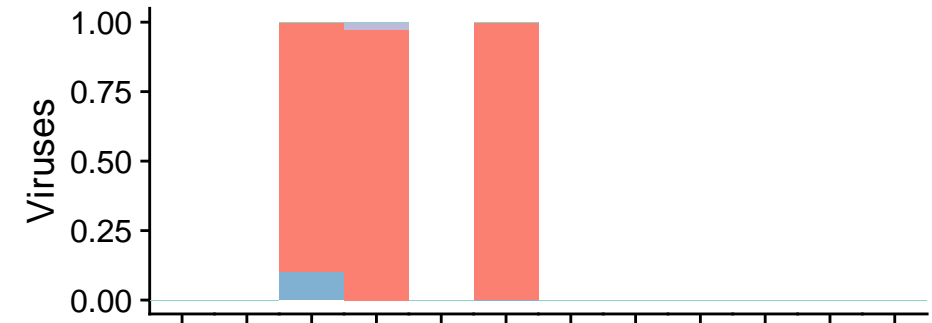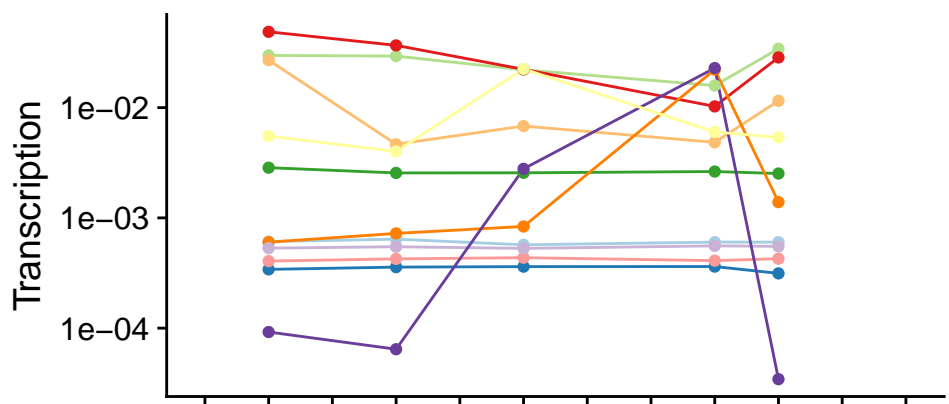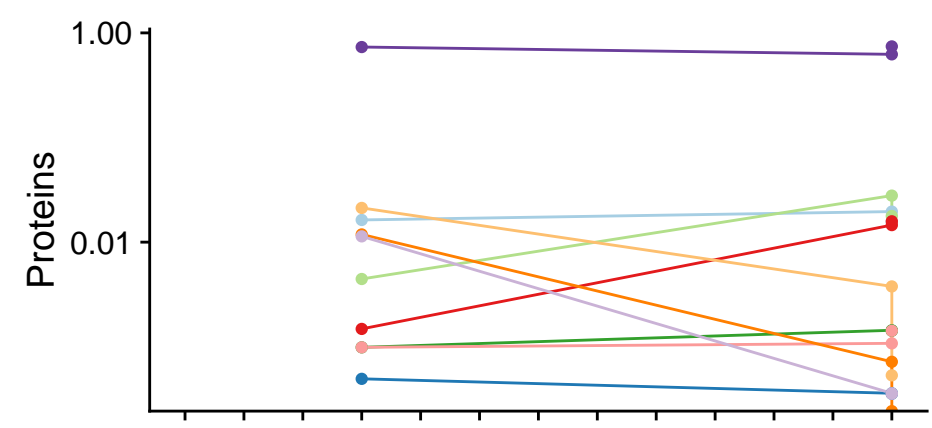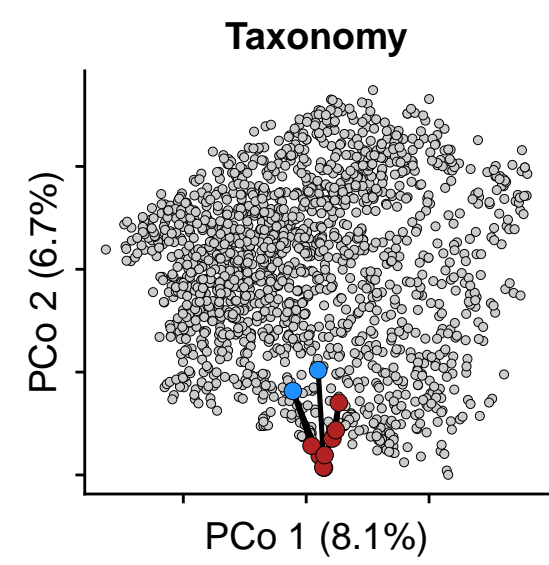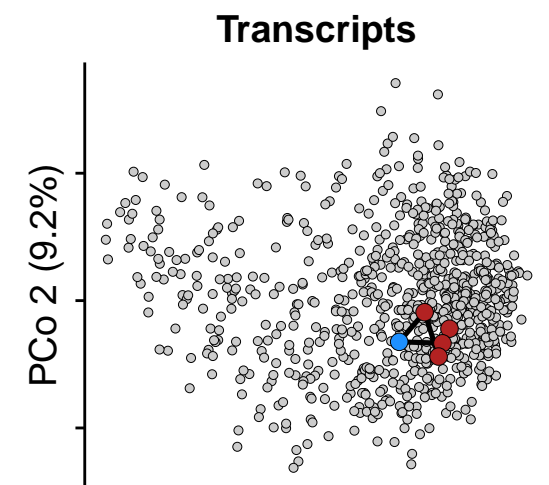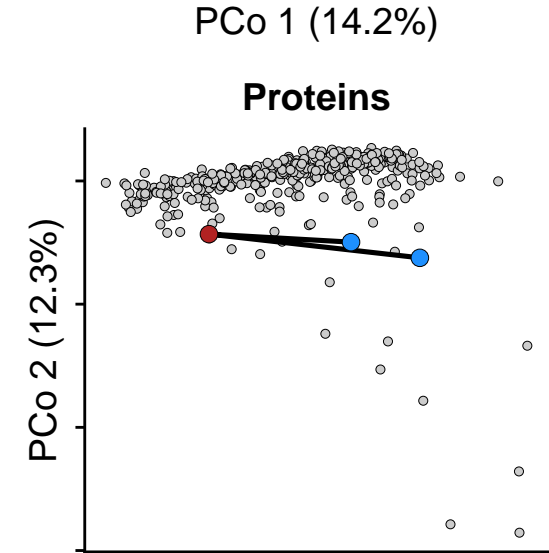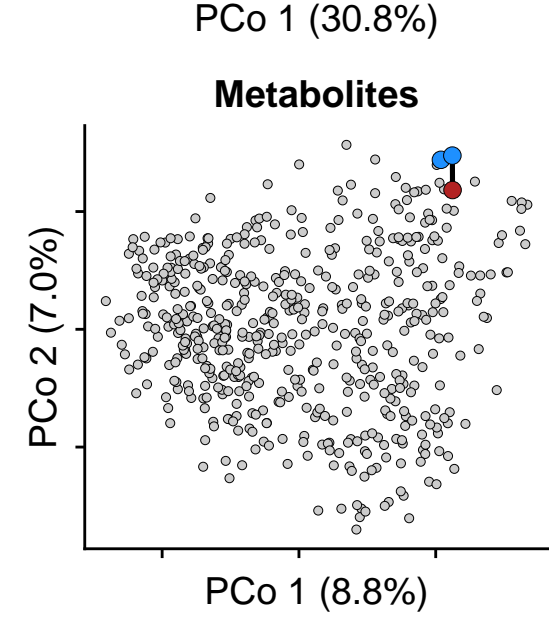



C3031: NA Female White Cedars–Sinai | CD

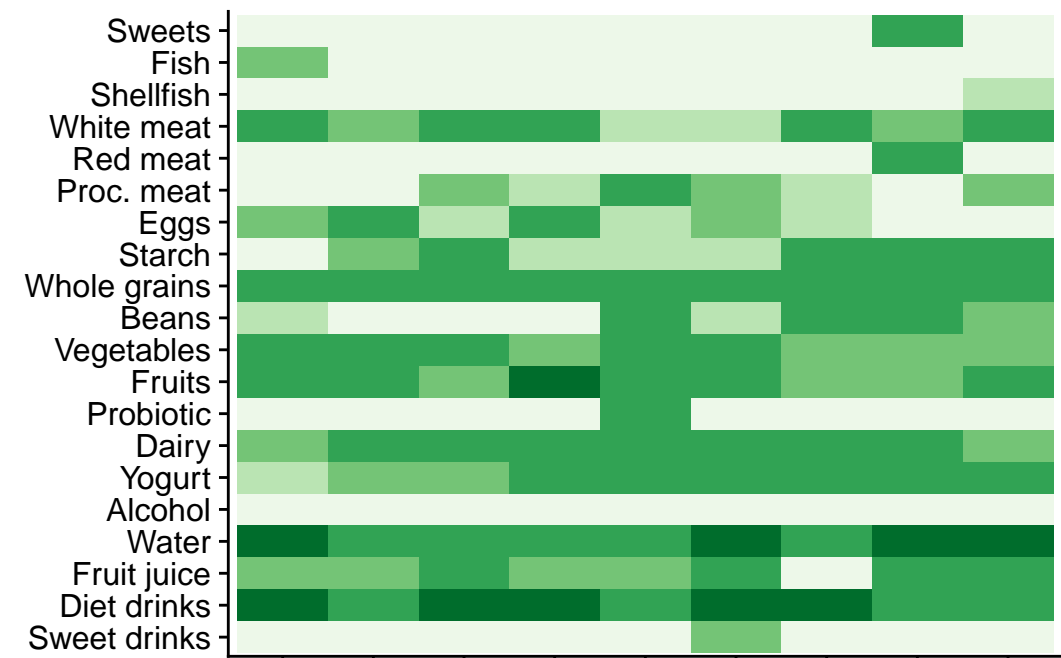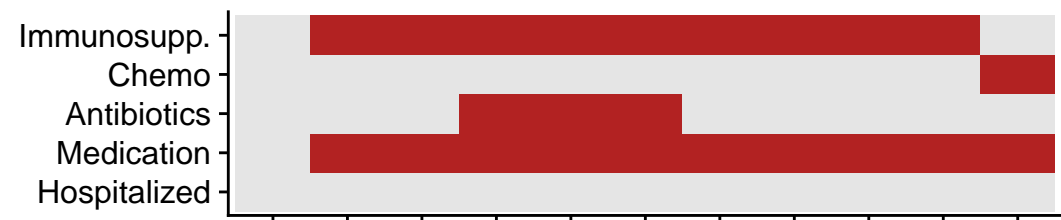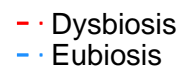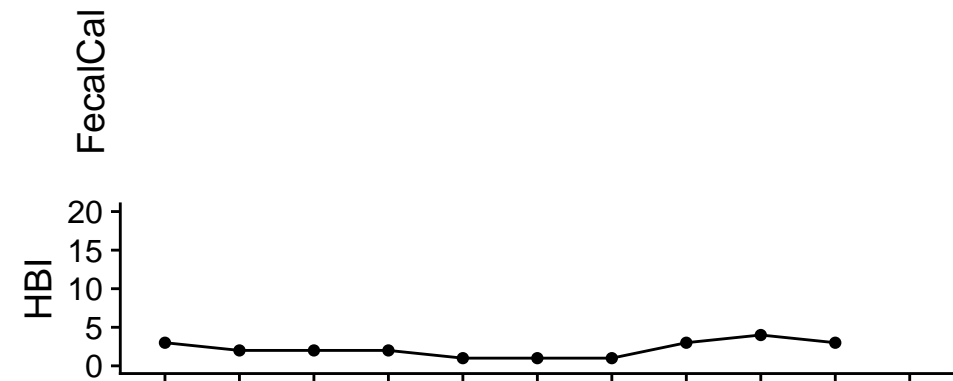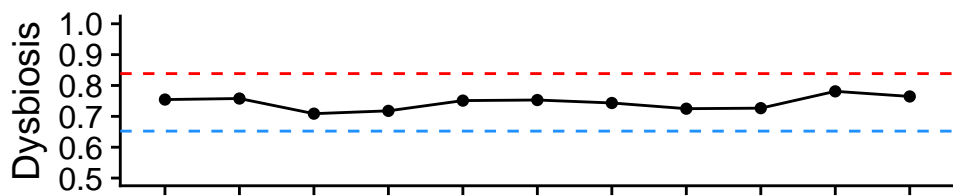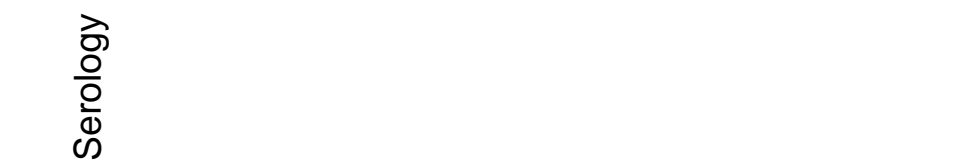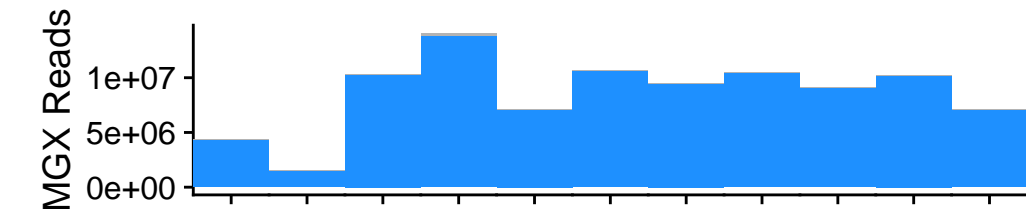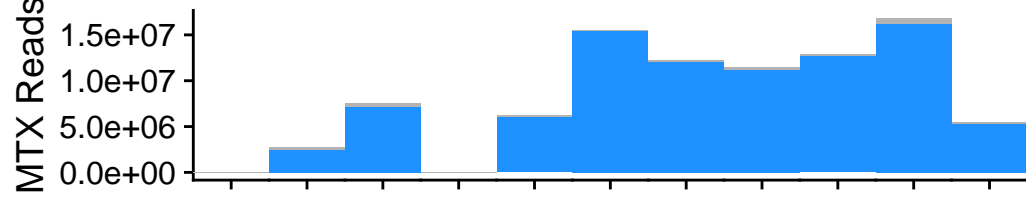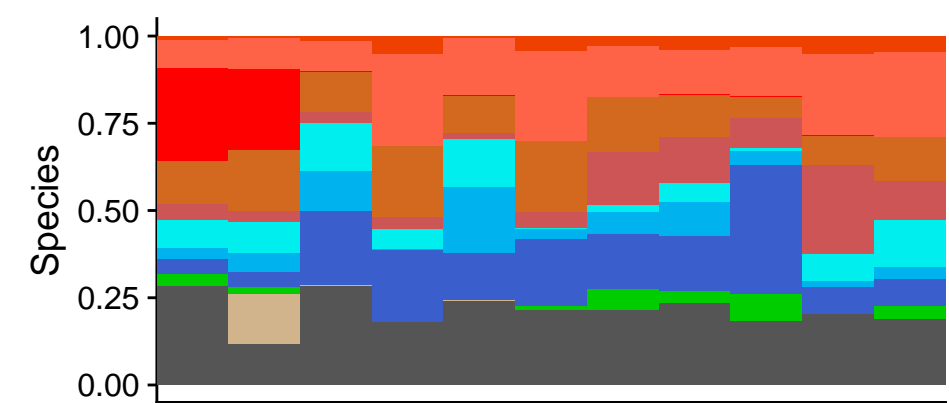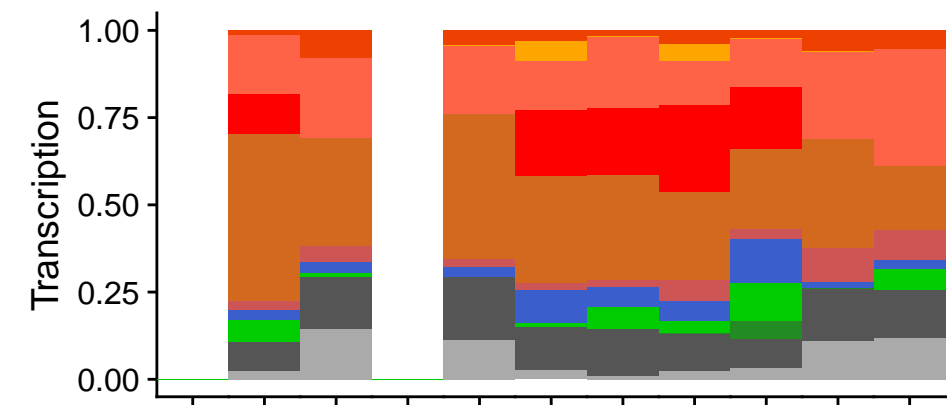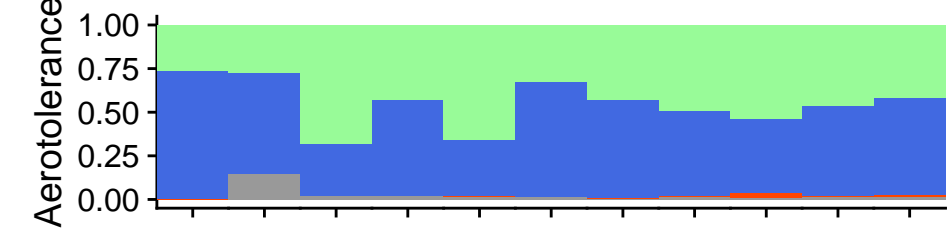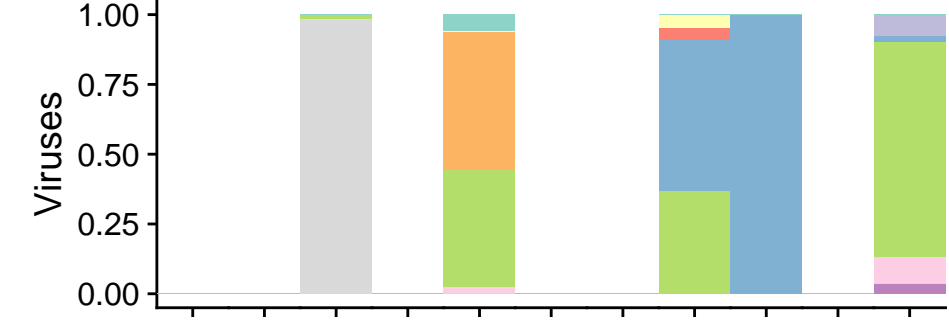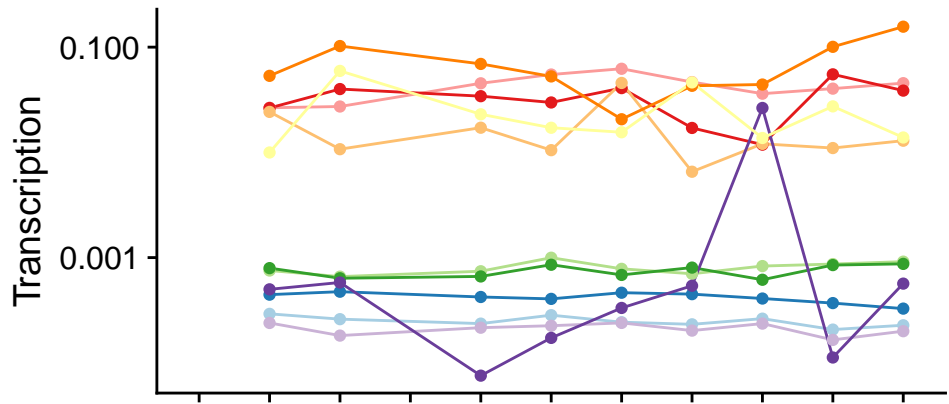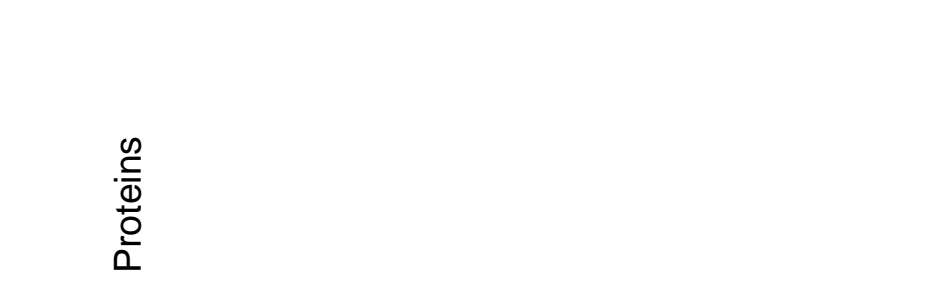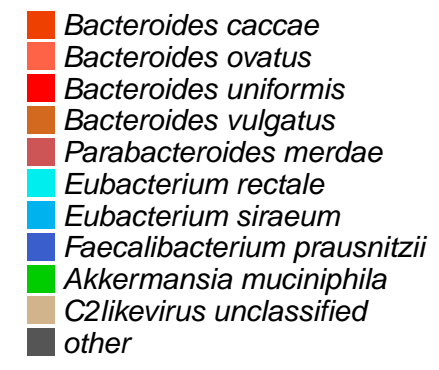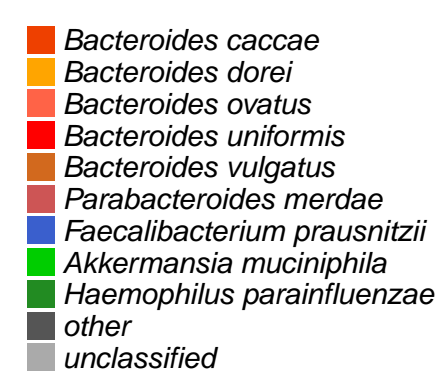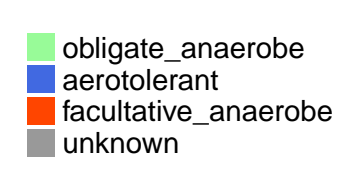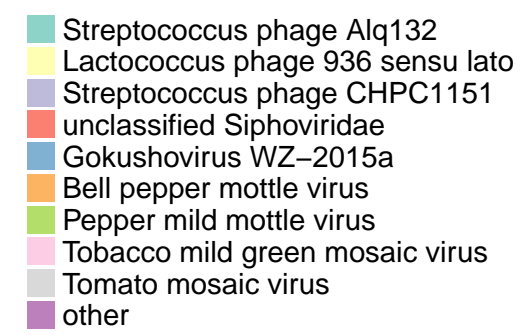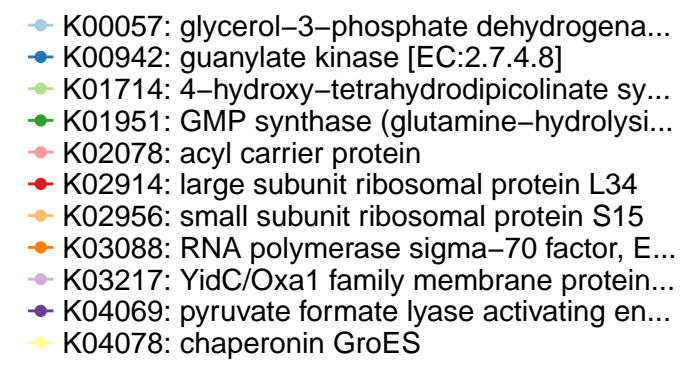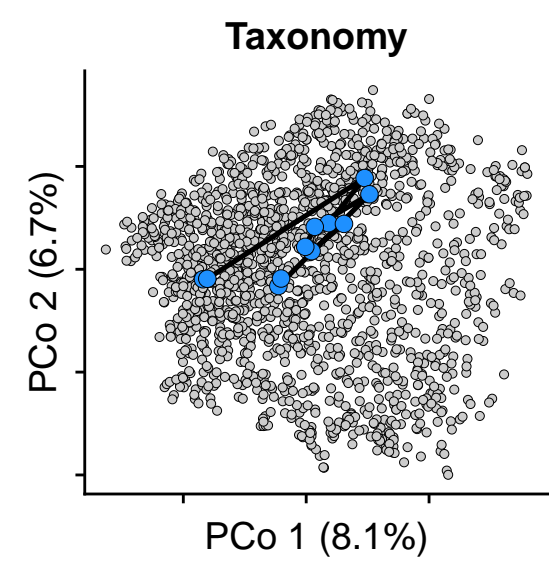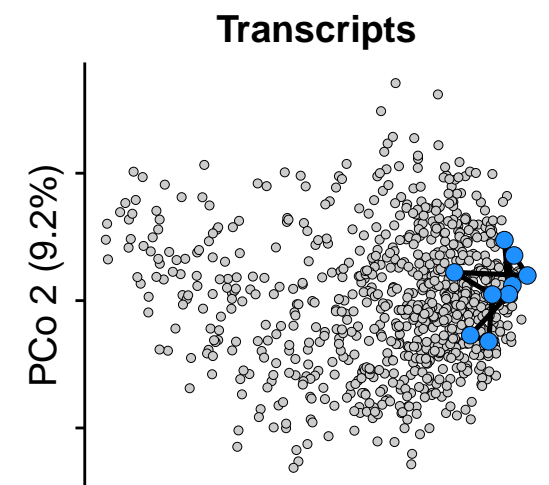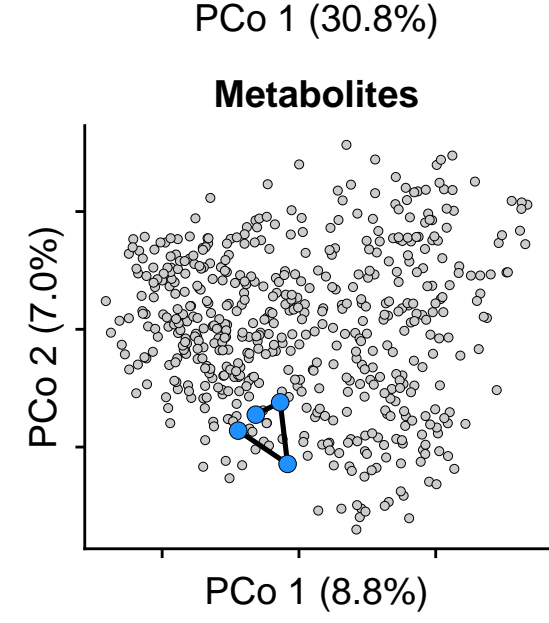

C3032: 42 Female White Cedars–Sinai | UC

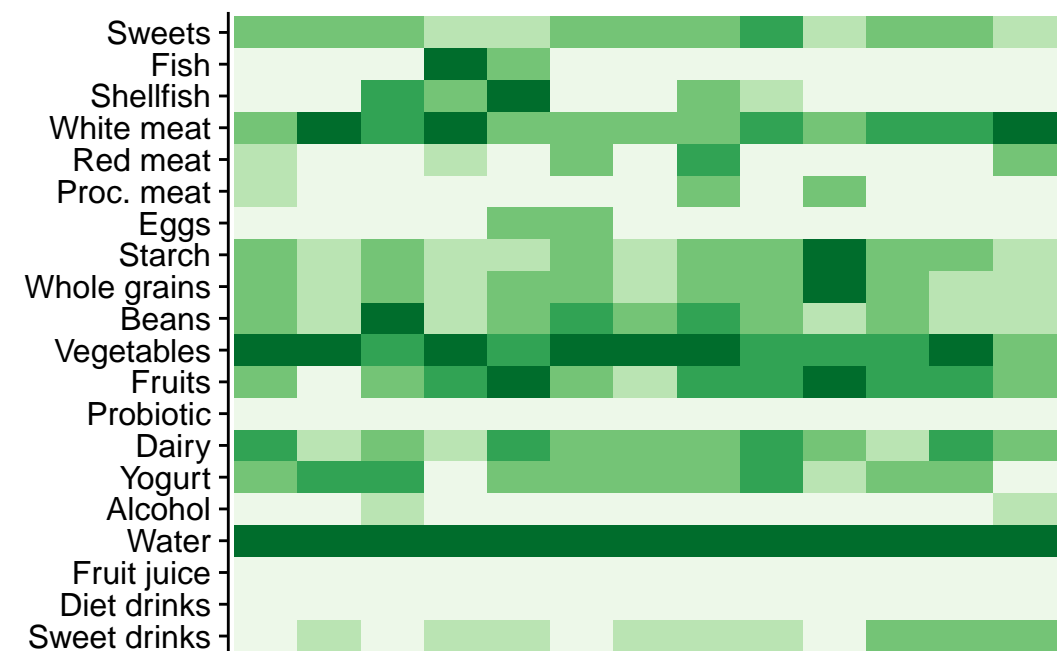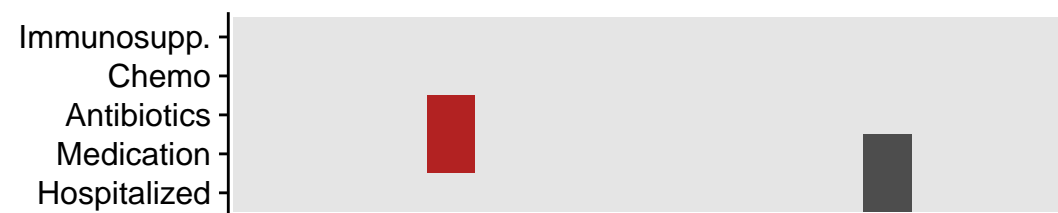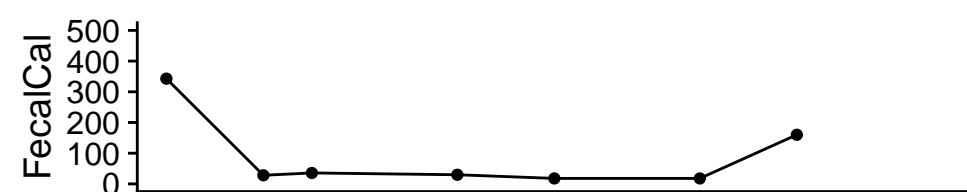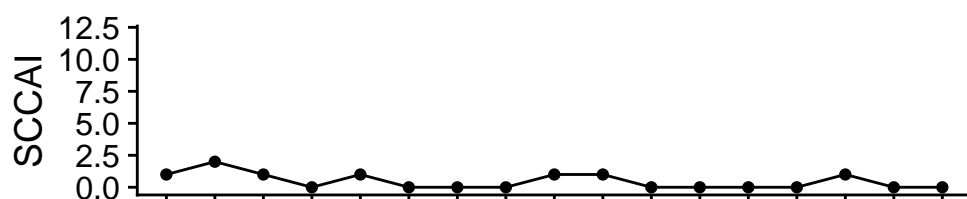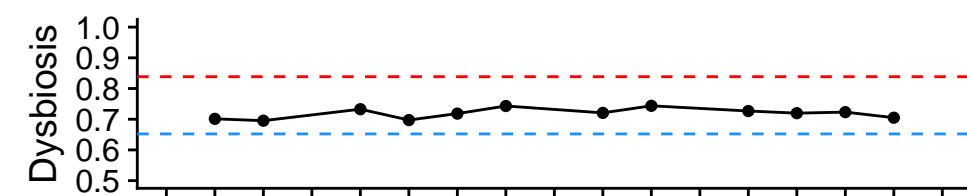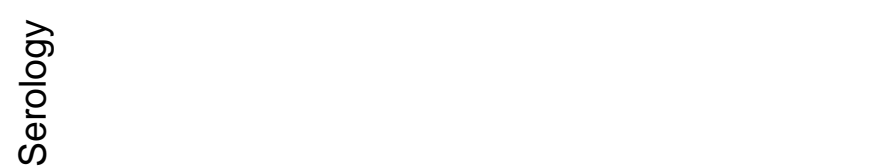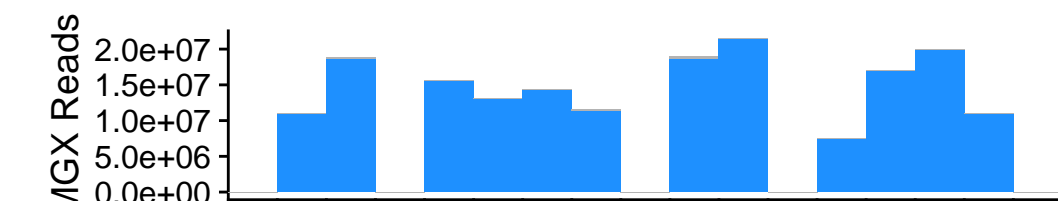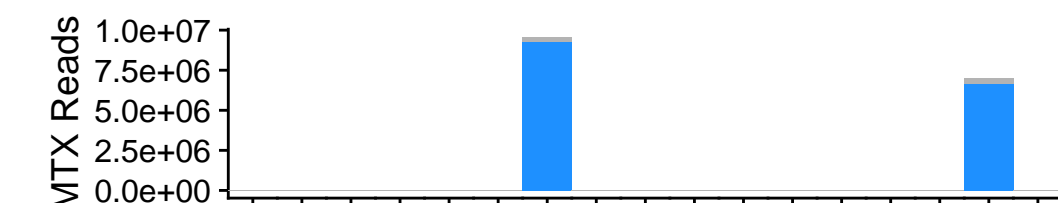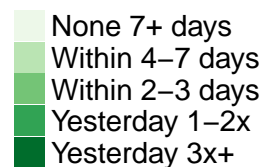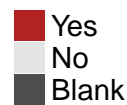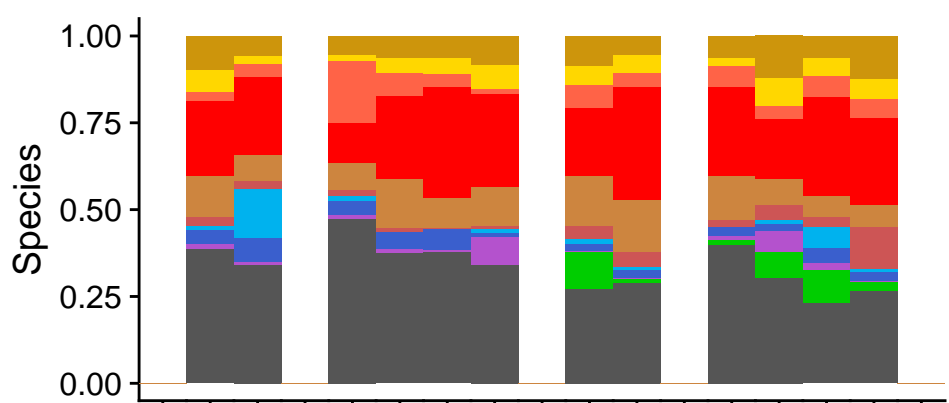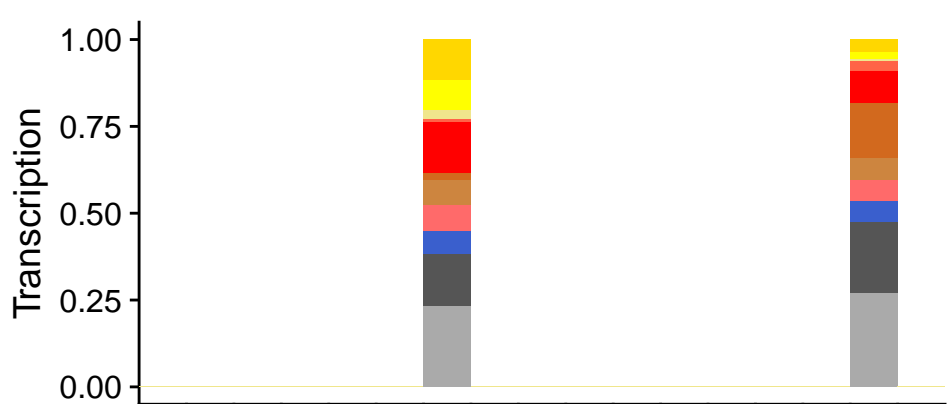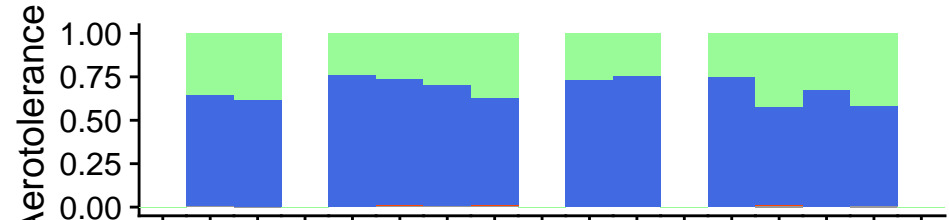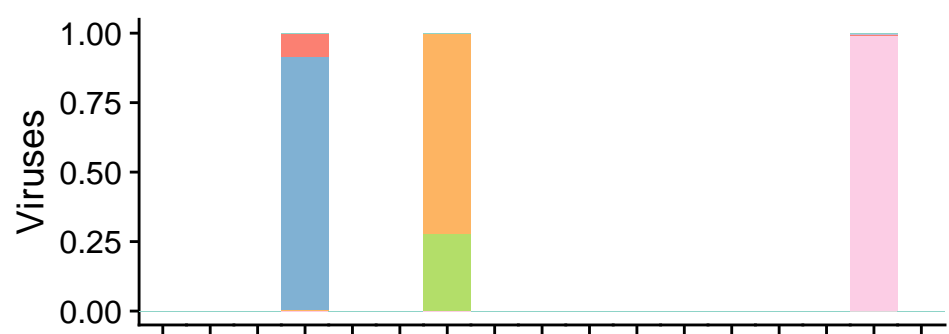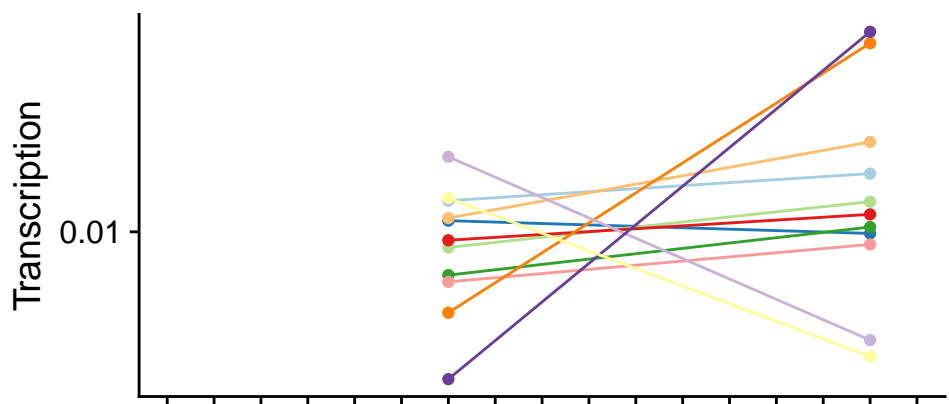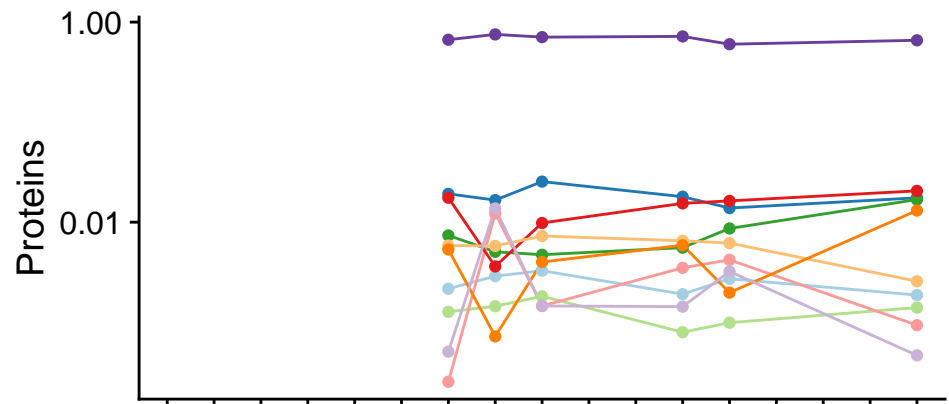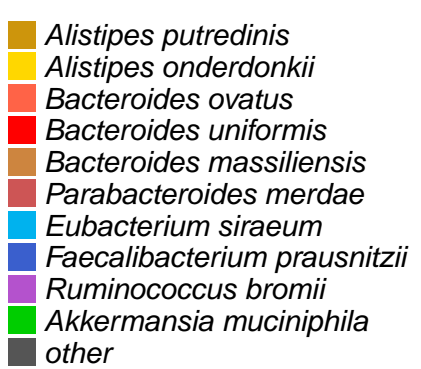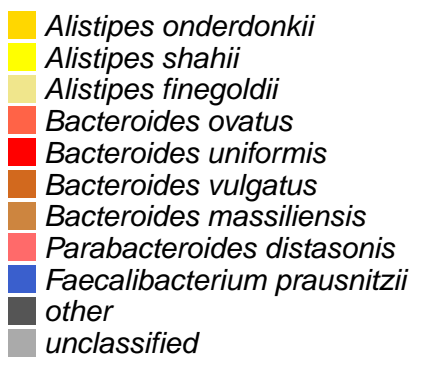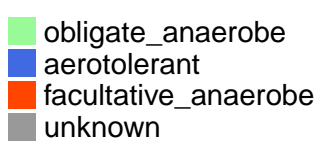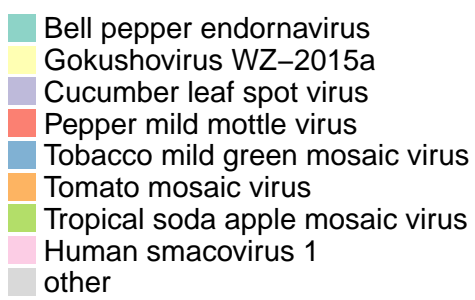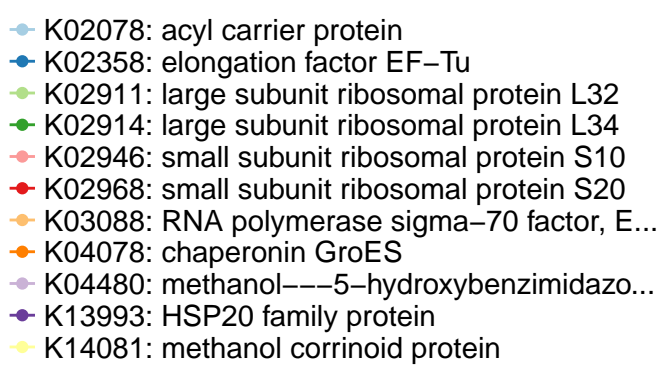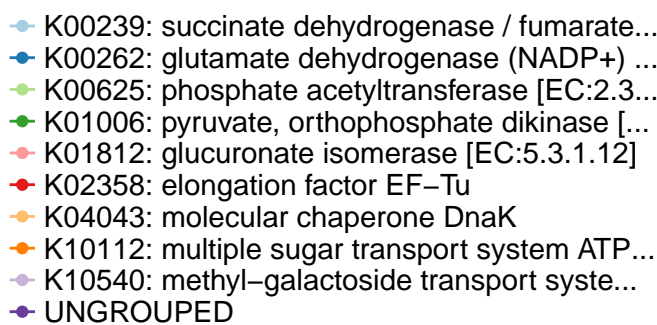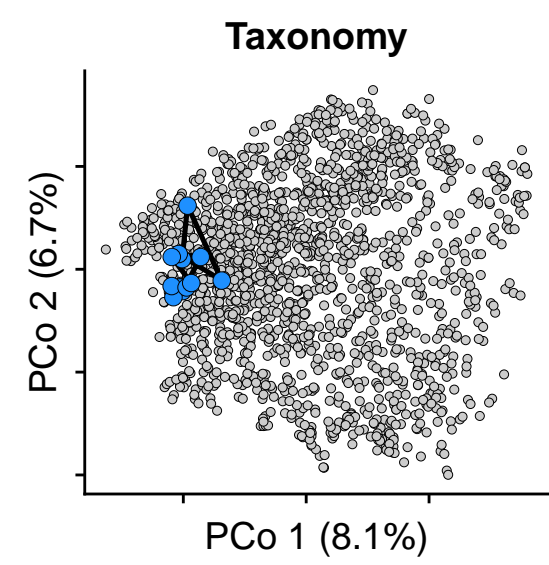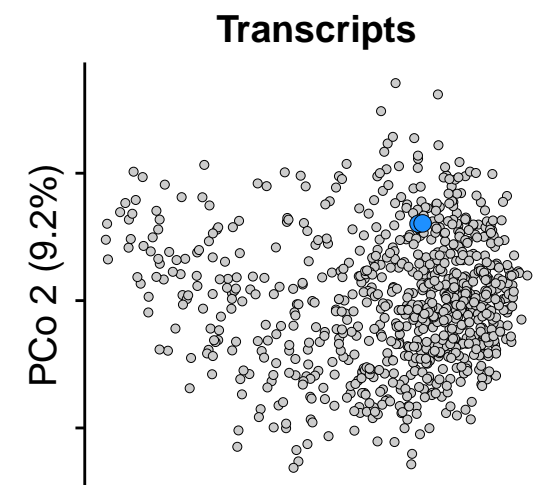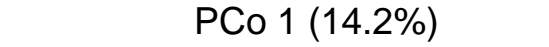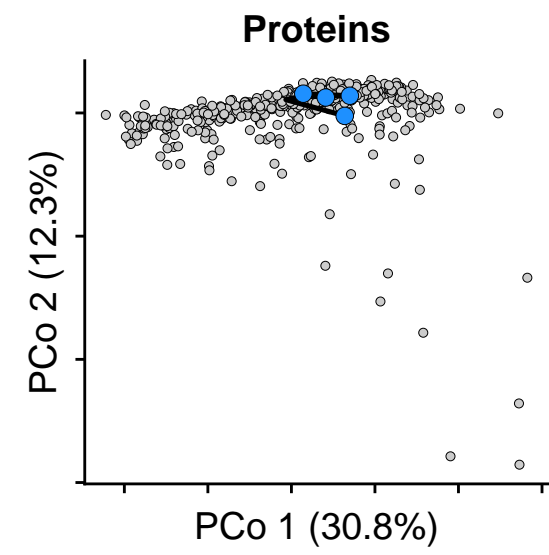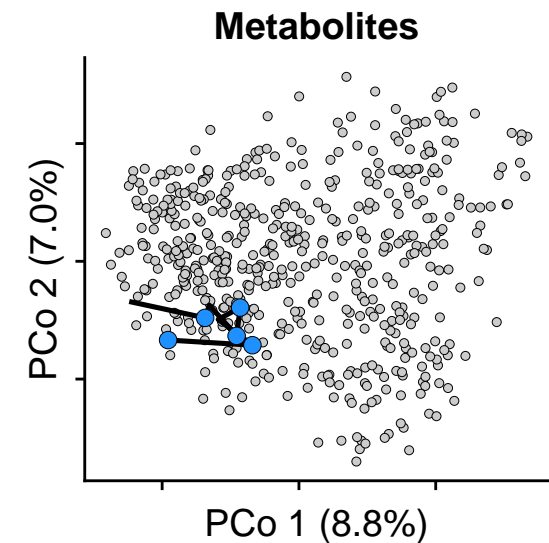

C3034: 36 Female White Cedars–Sinai | UC

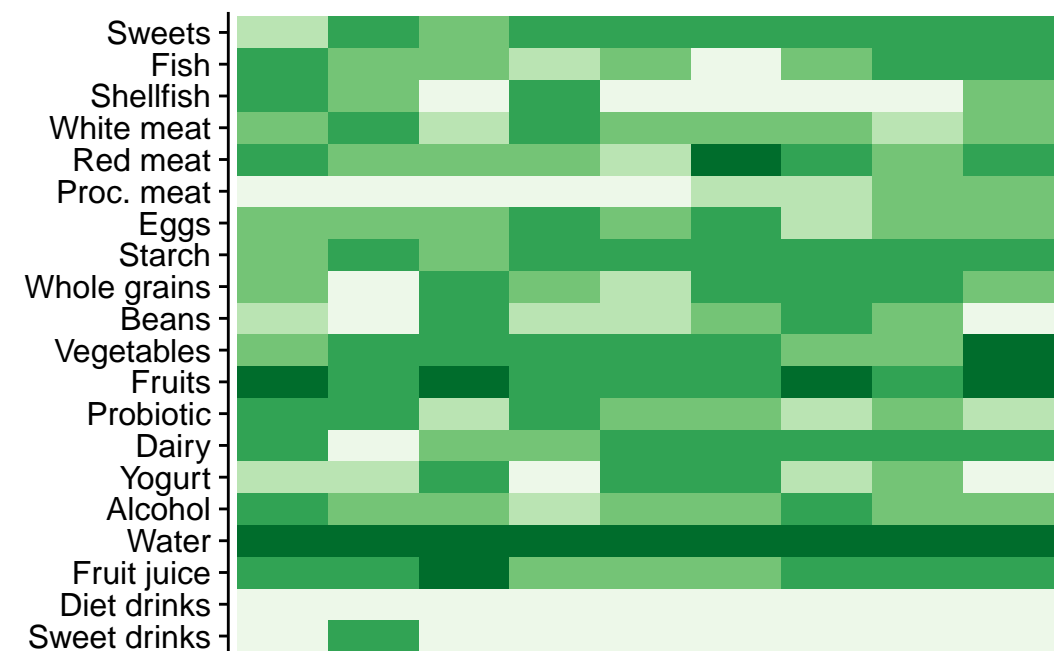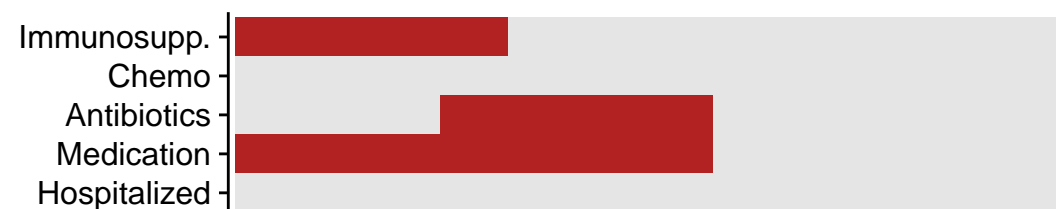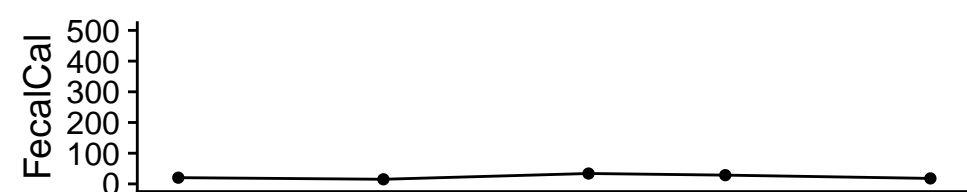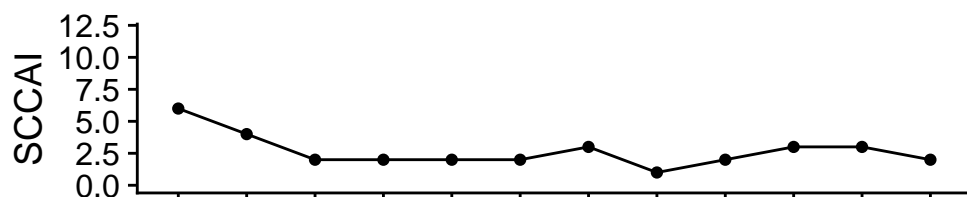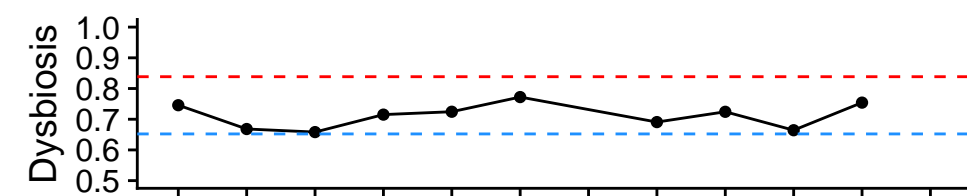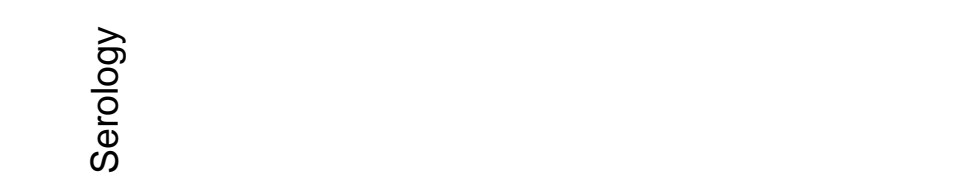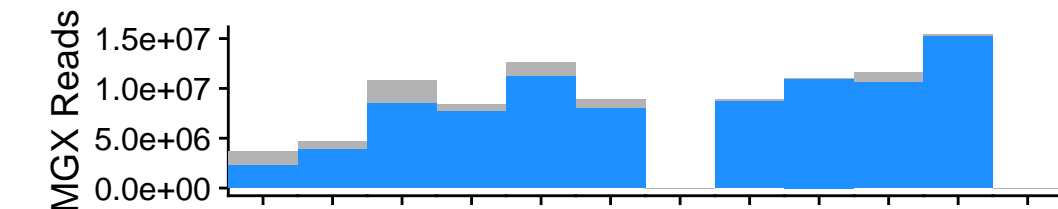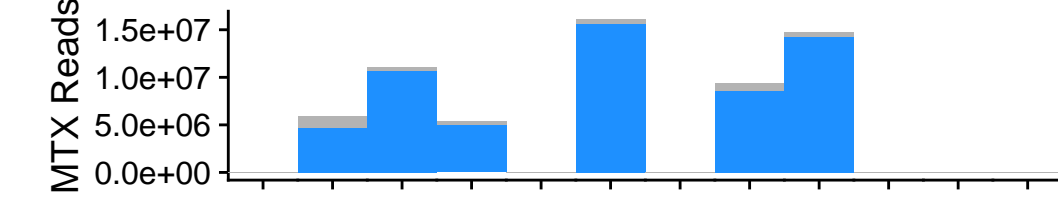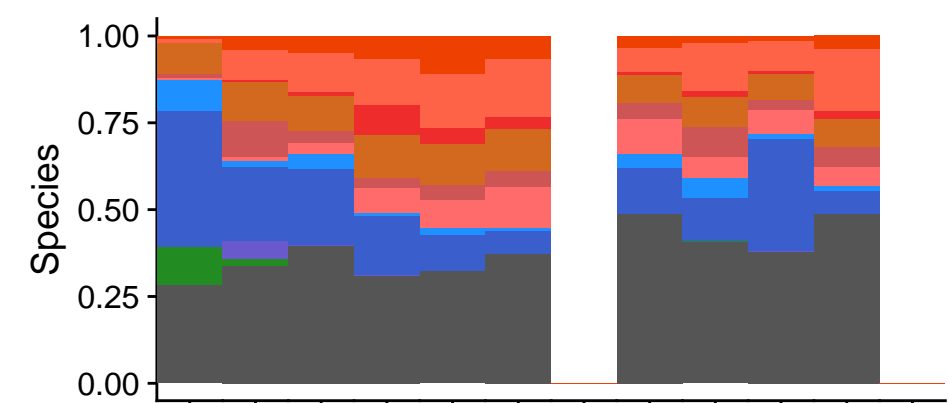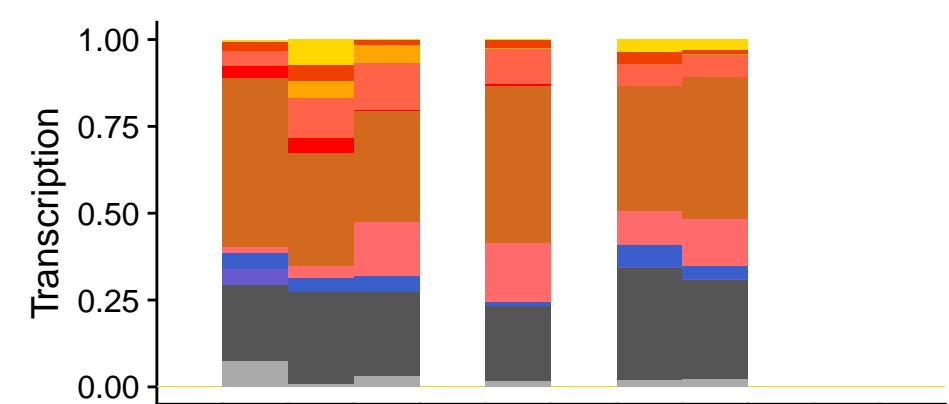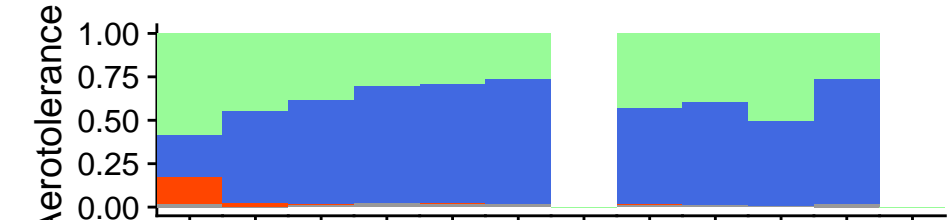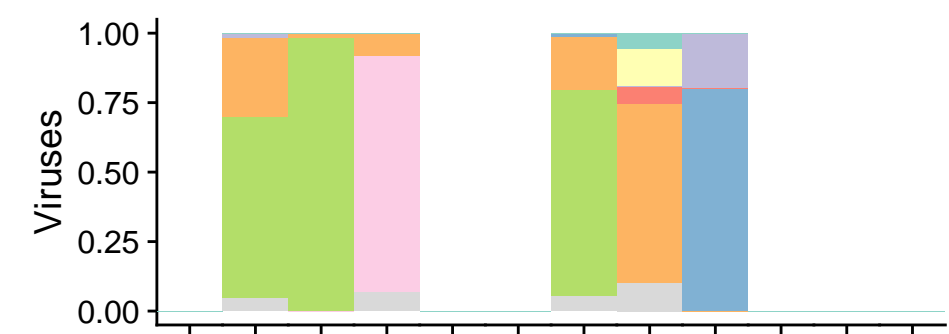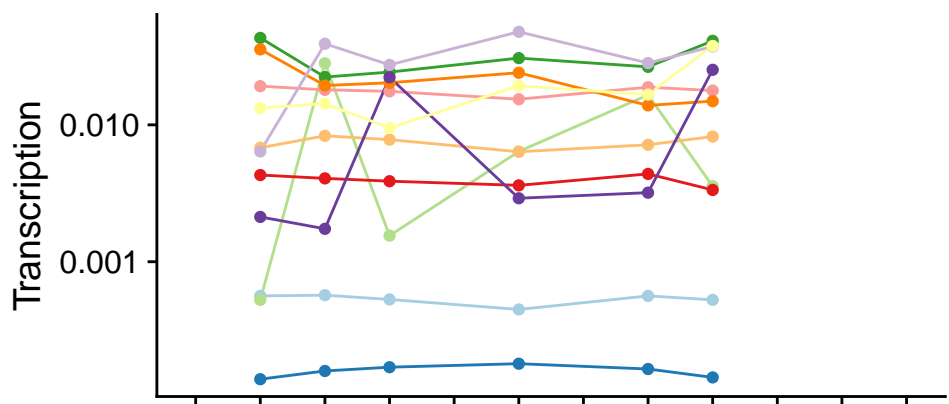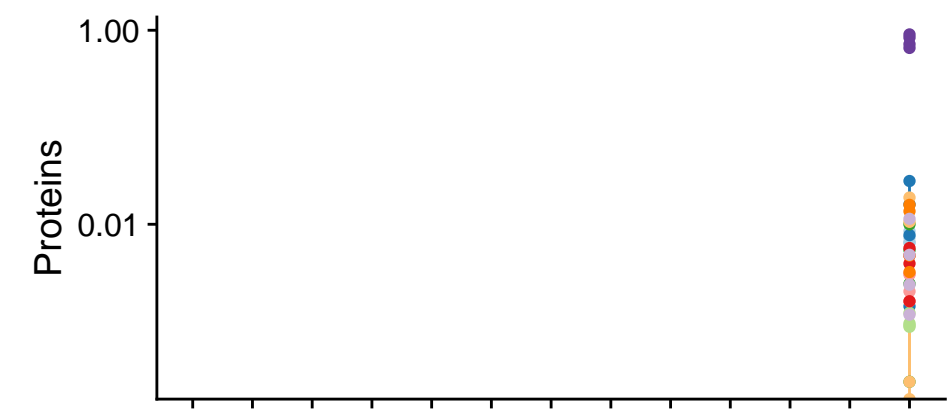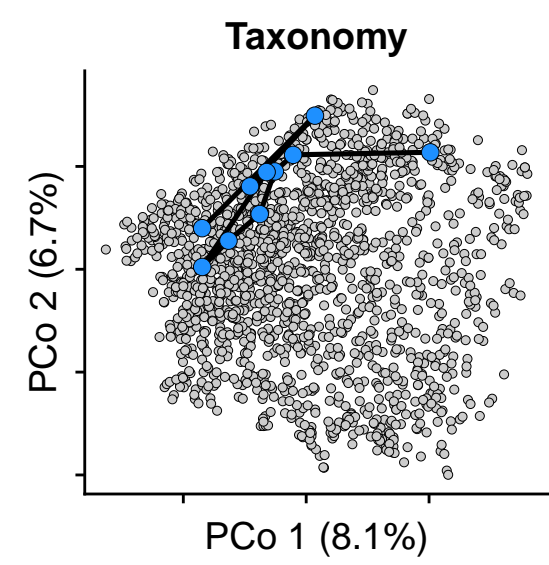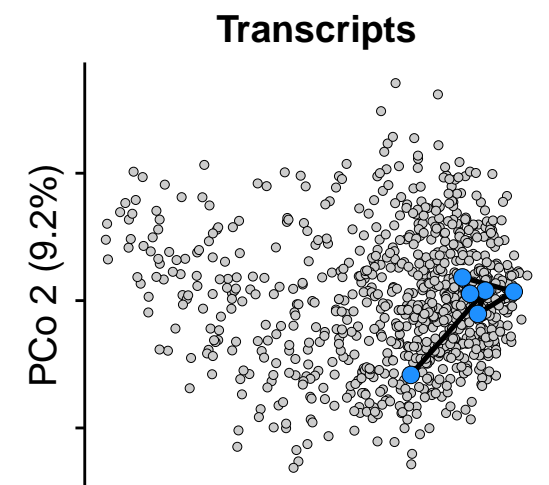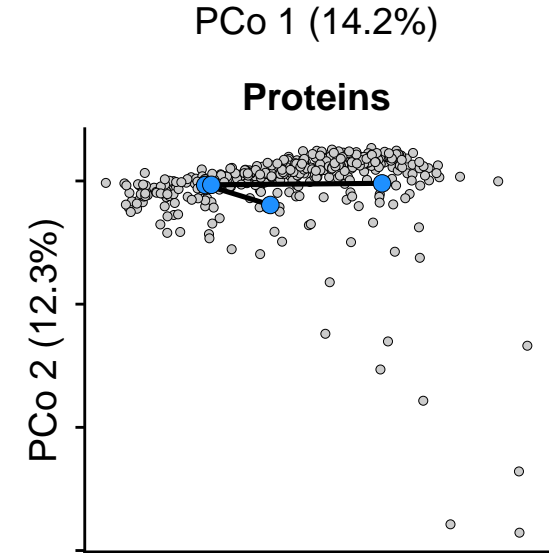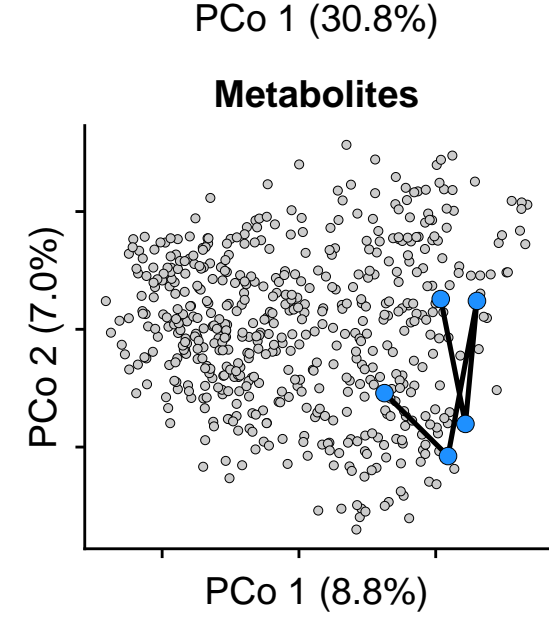

C3035: 62 Male White Cedars–Sinai | CD L3

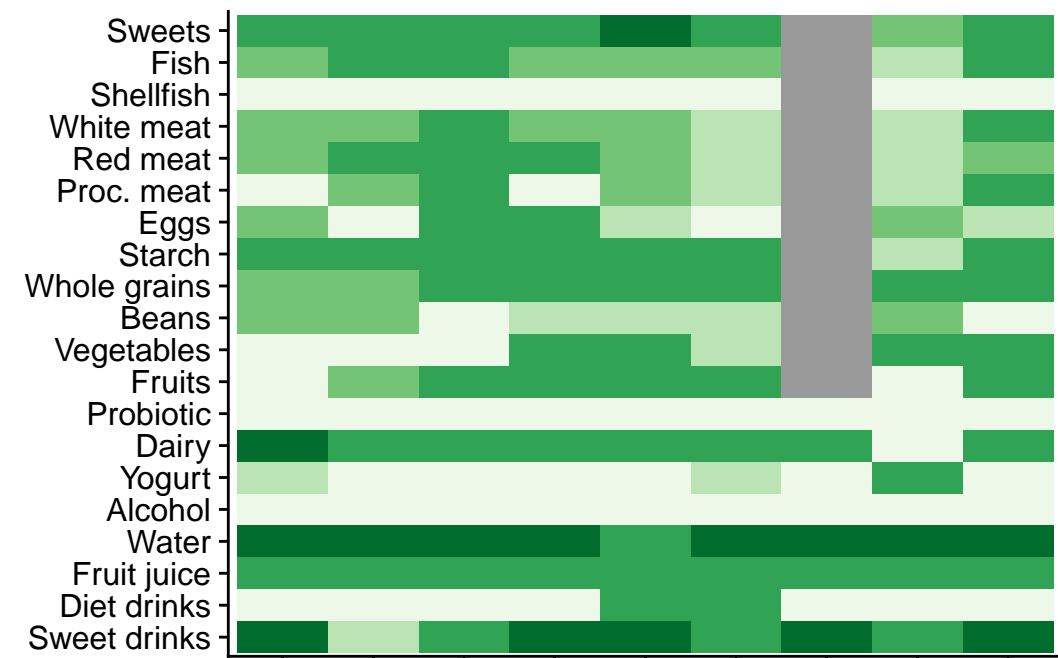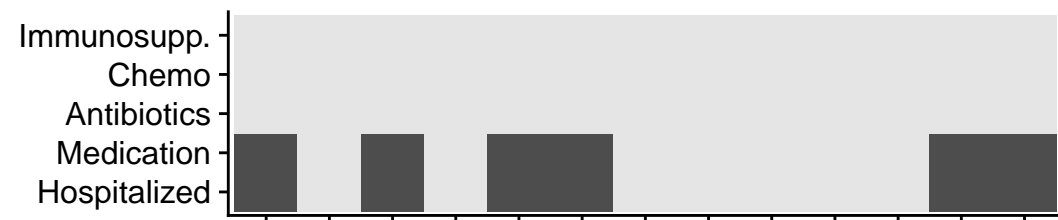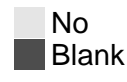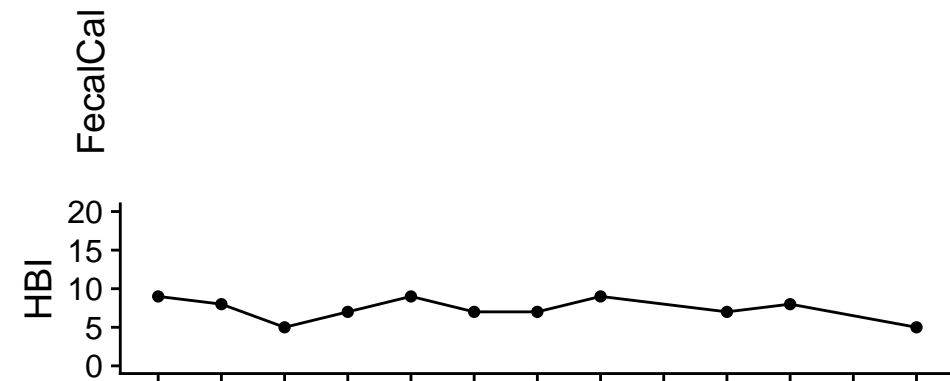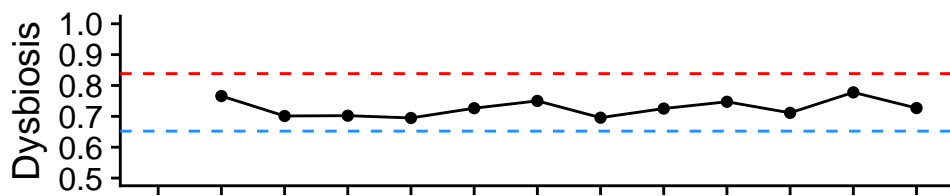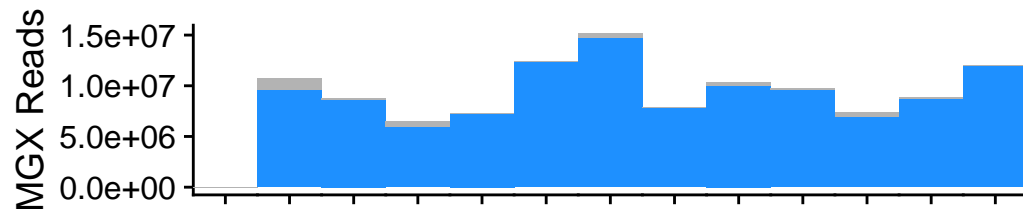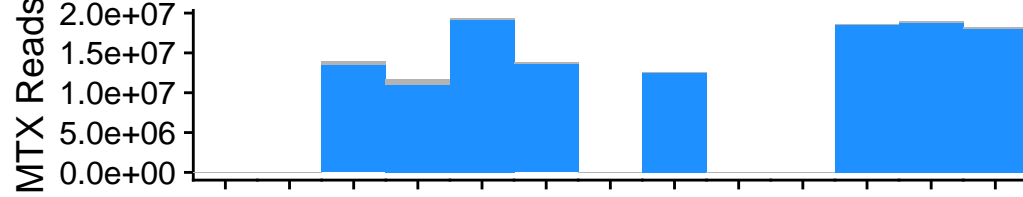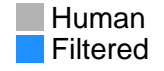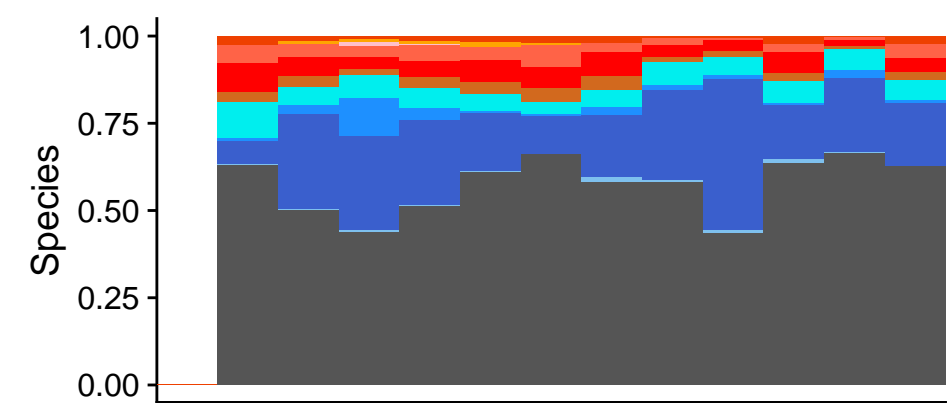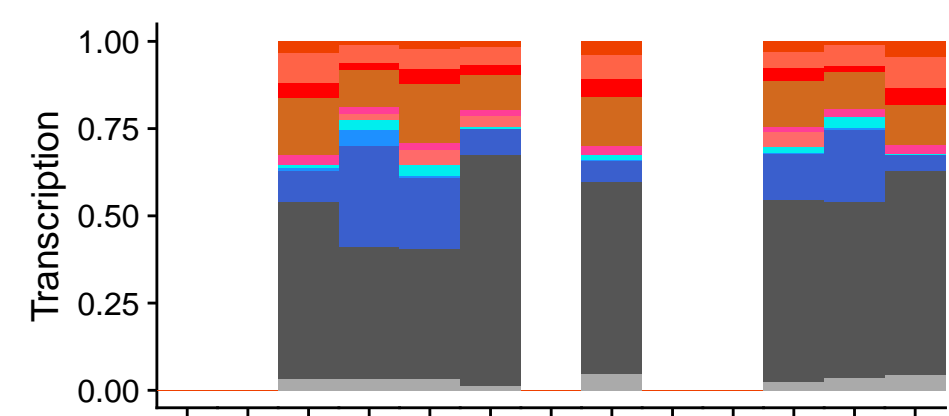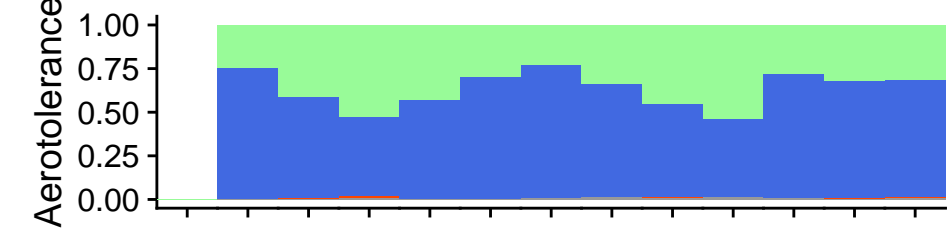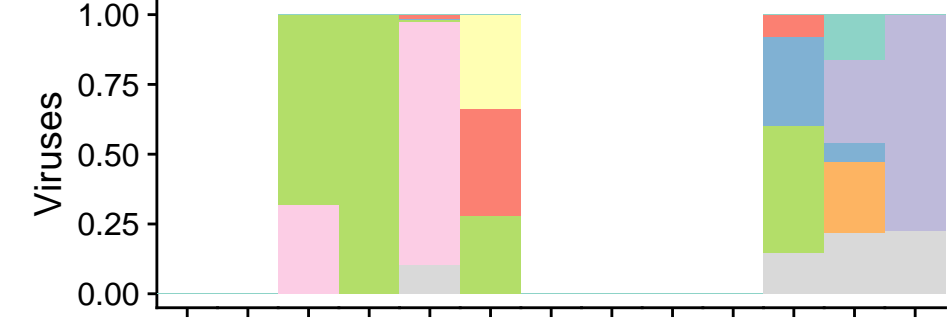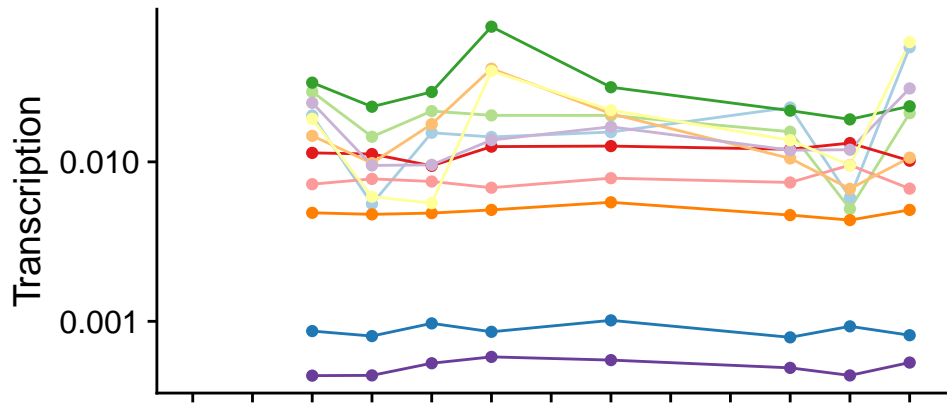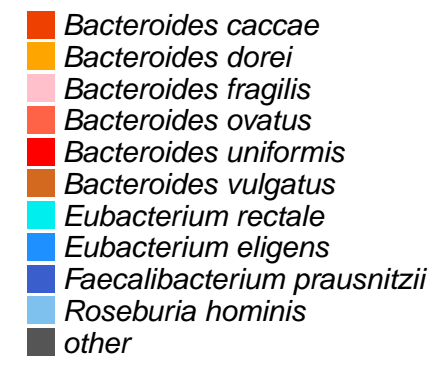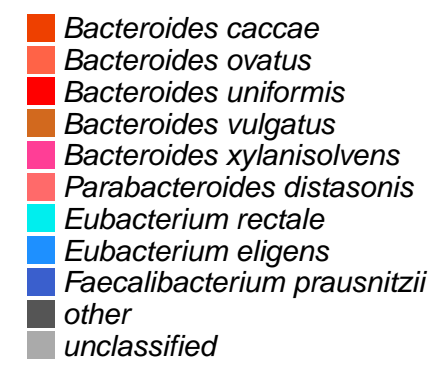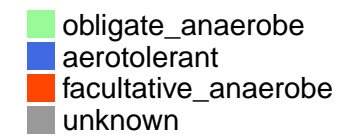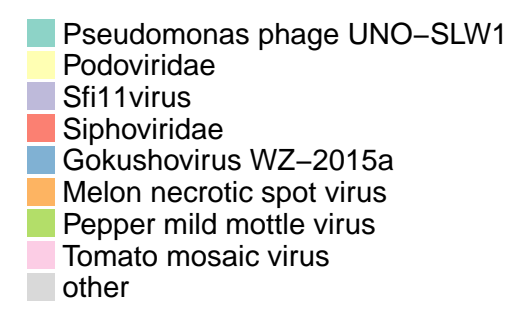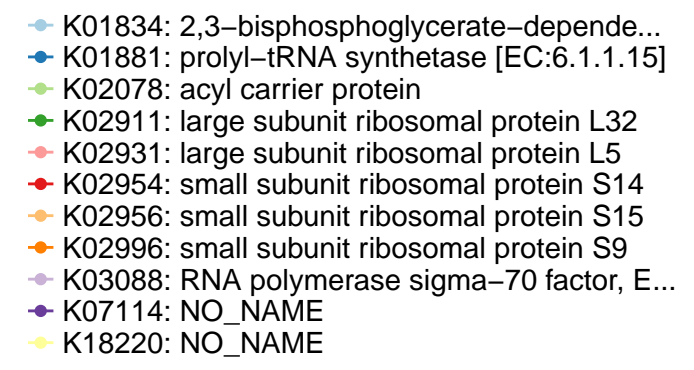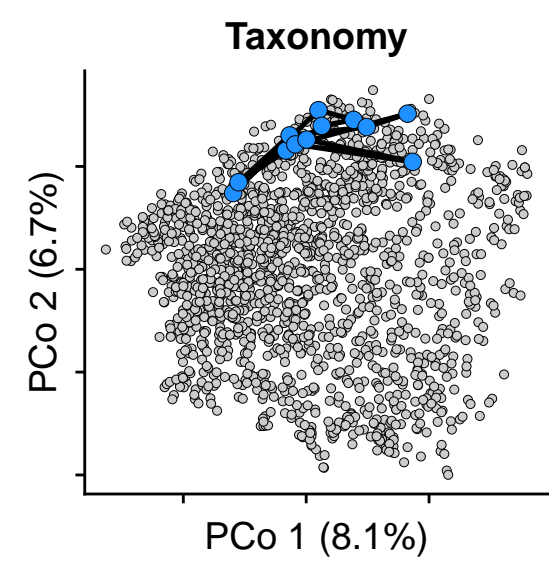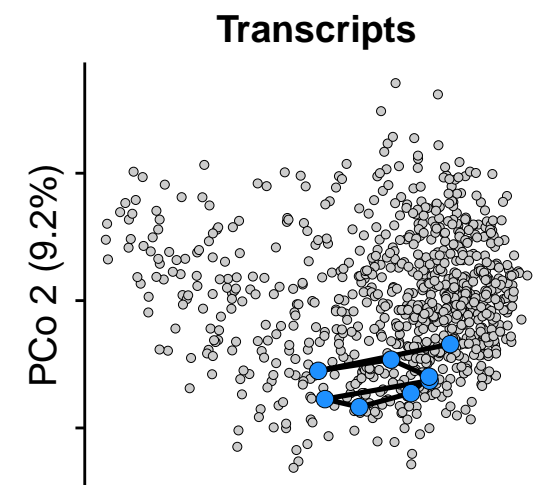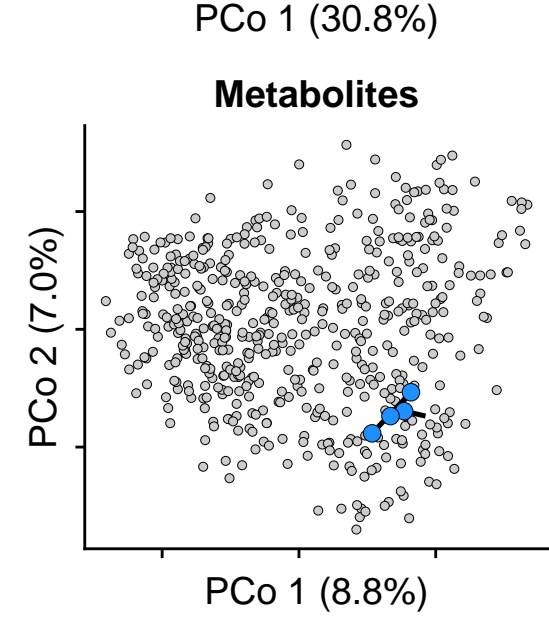

C3037: 46 Female White Cedars–Sinai | UC

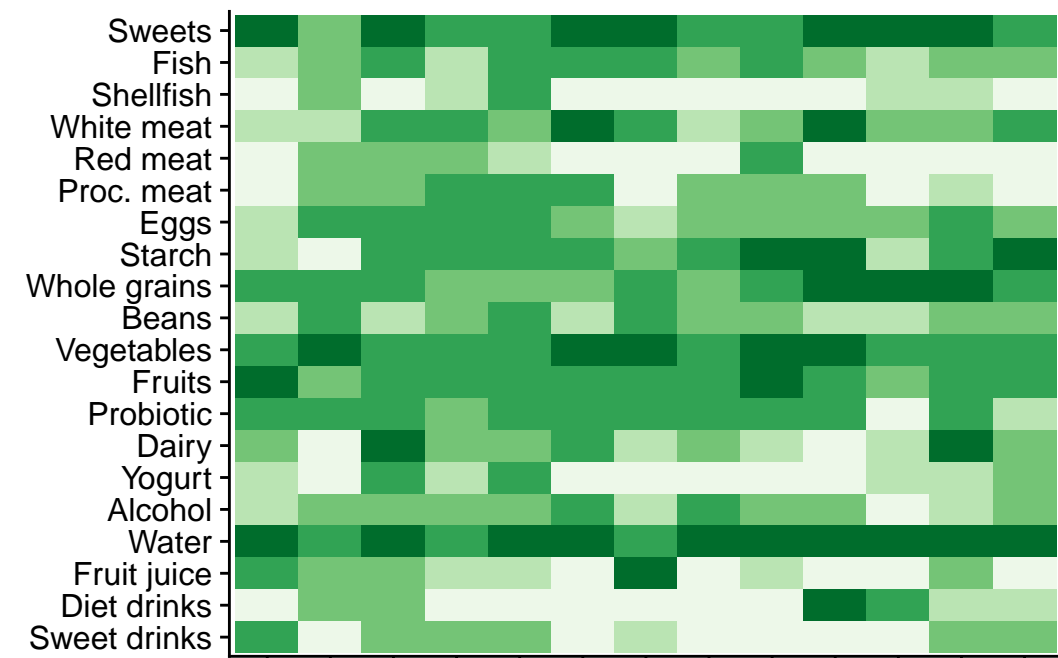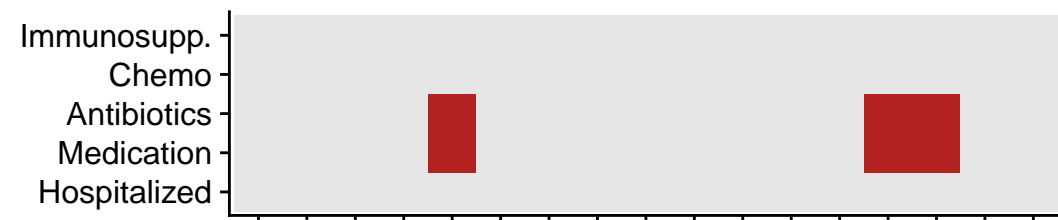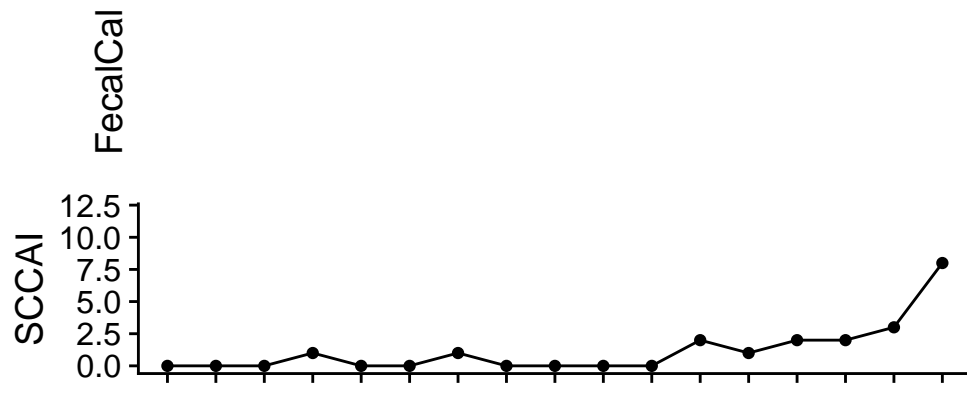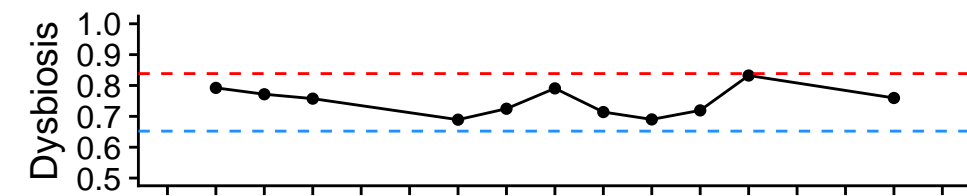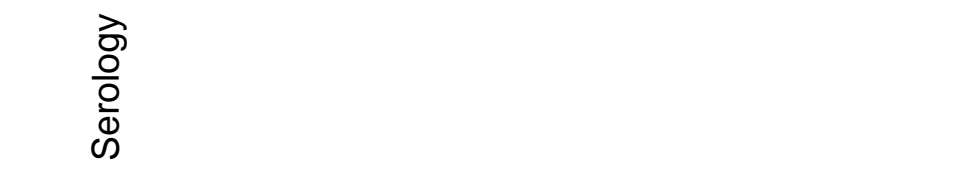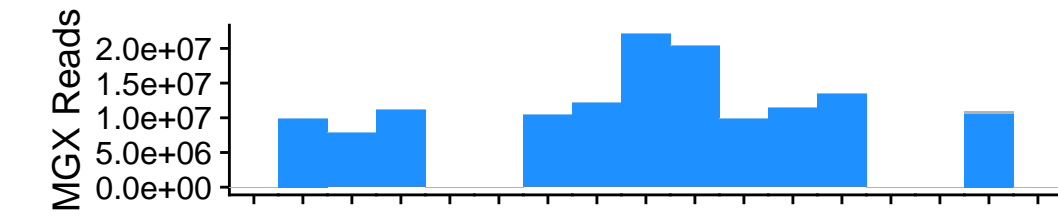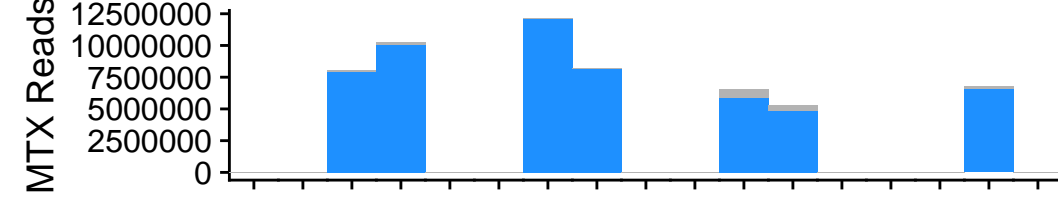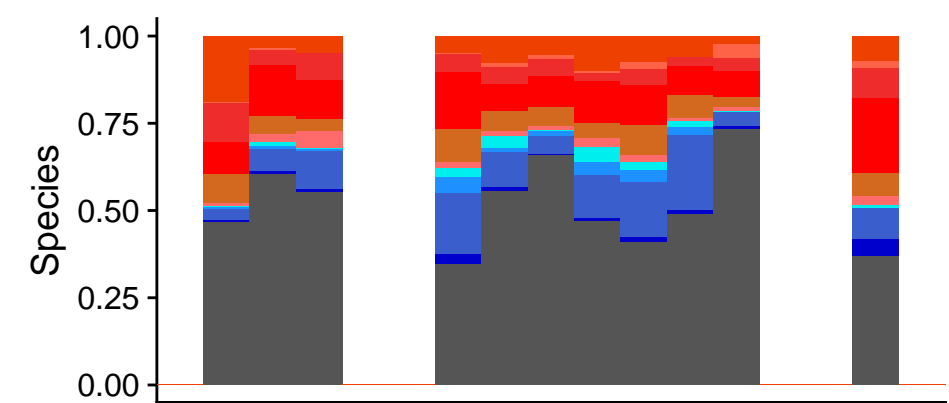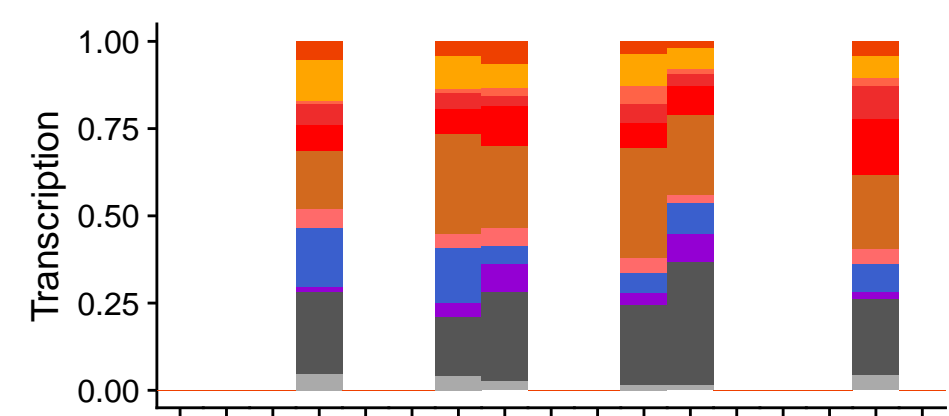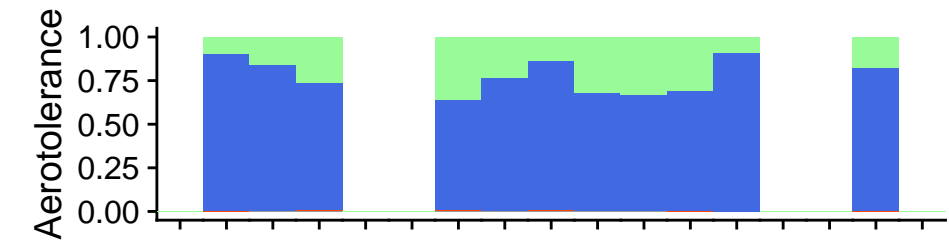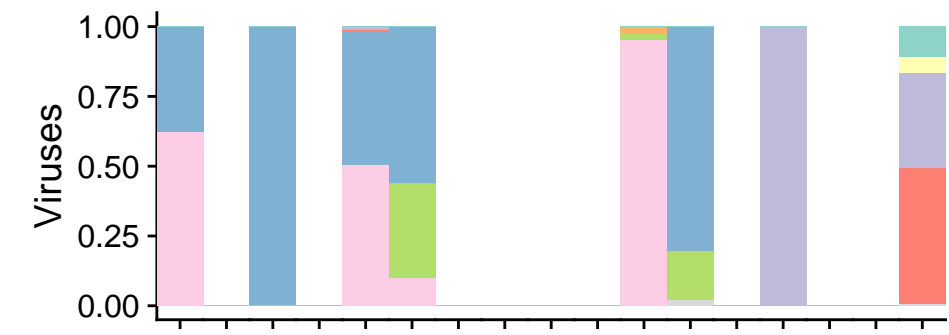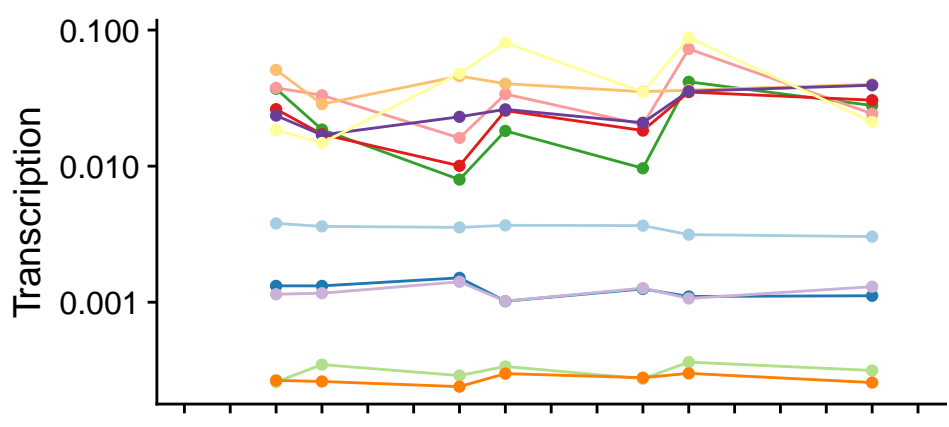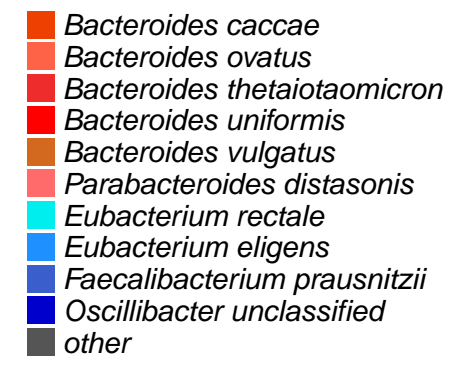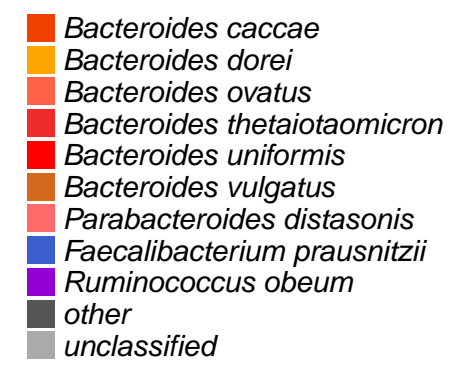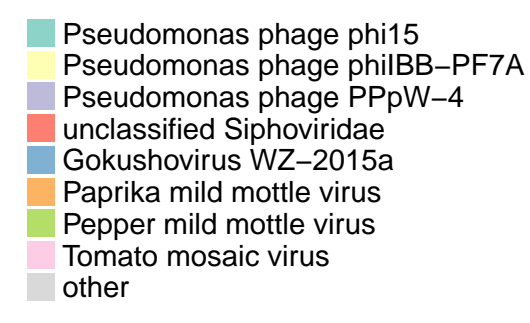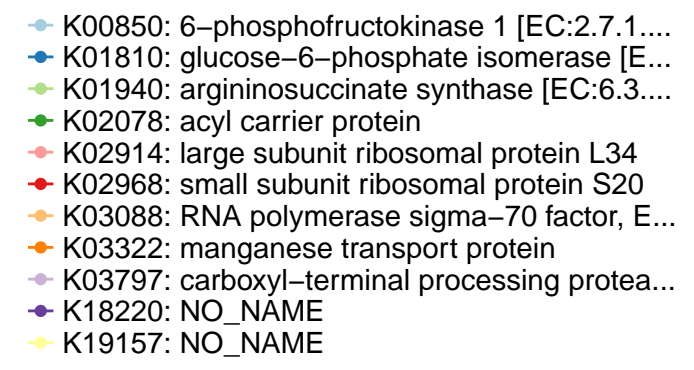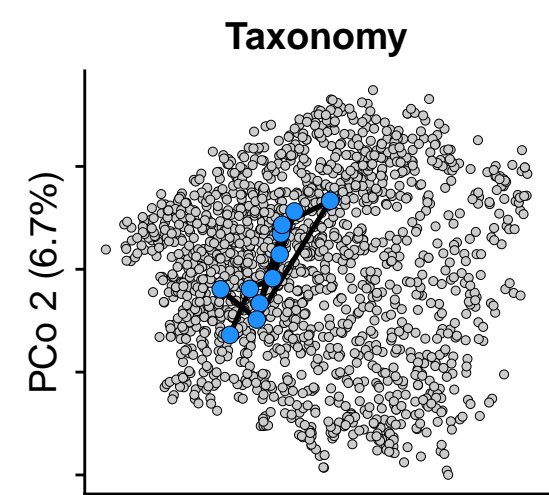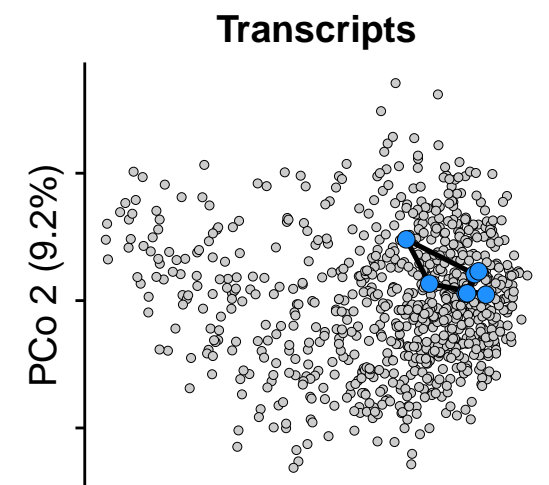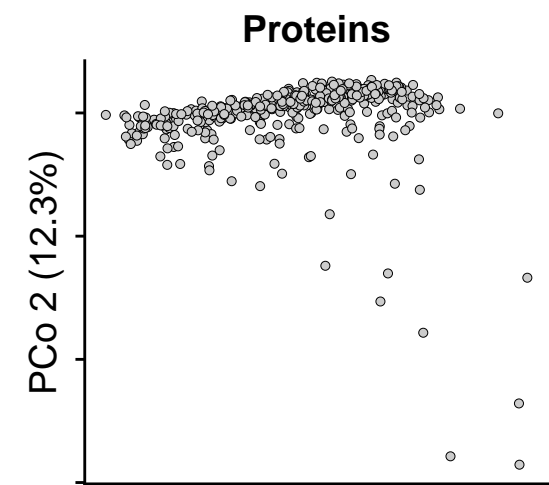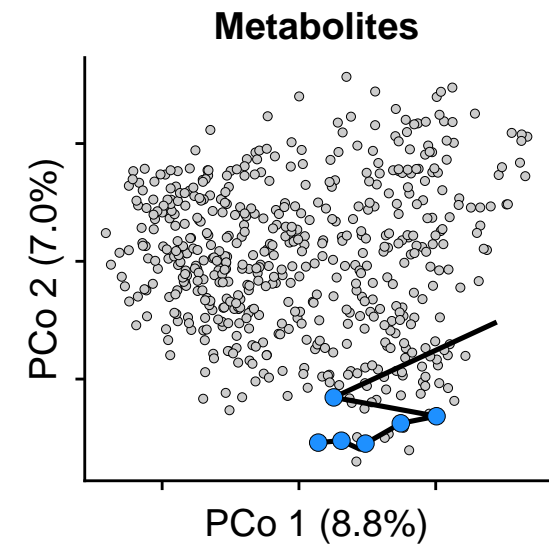

# E5001: 8 Female More than one race Emory | CD L3+L4

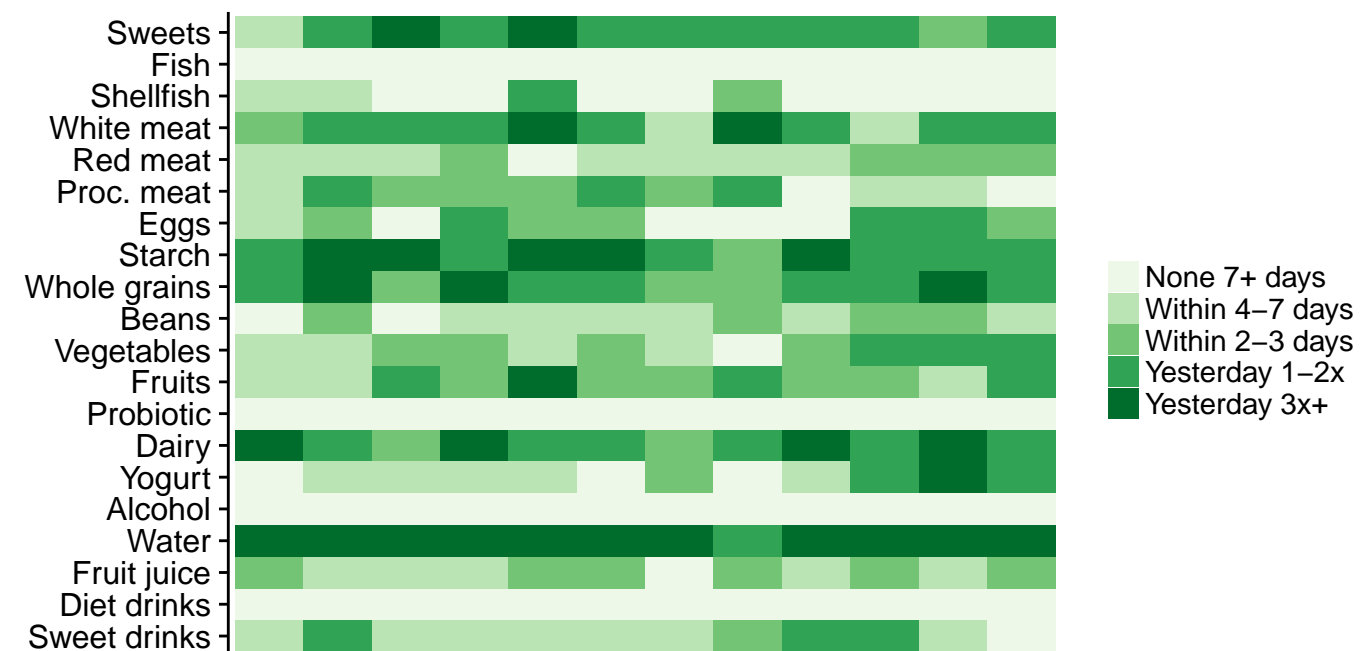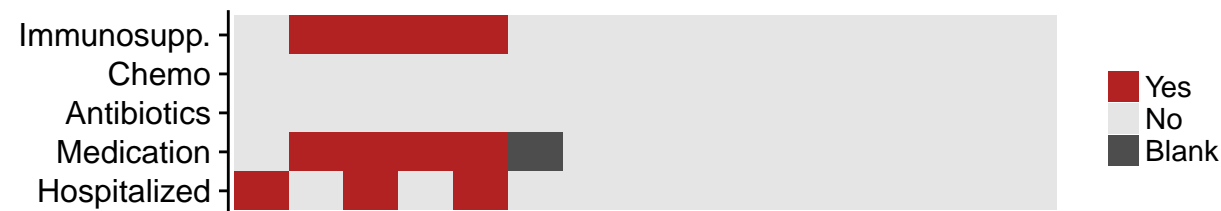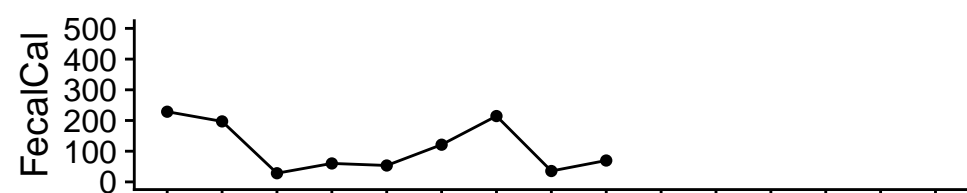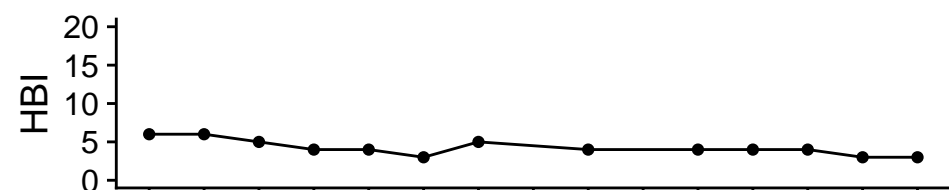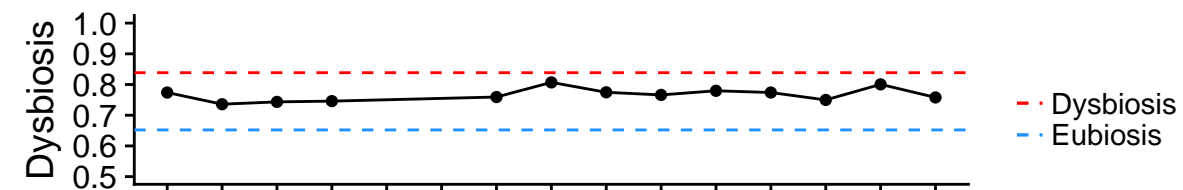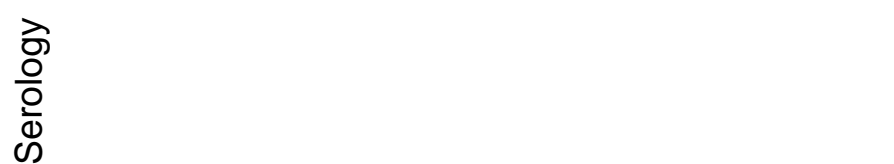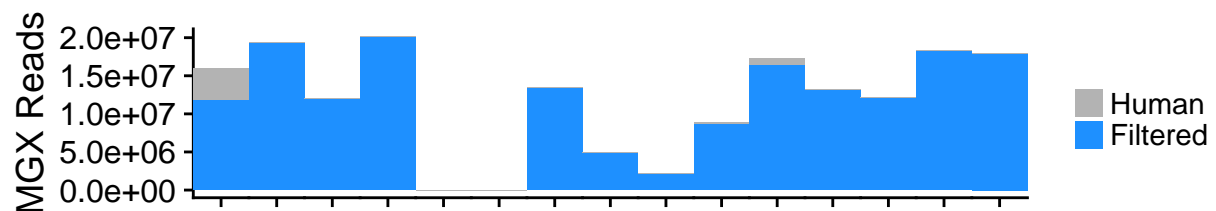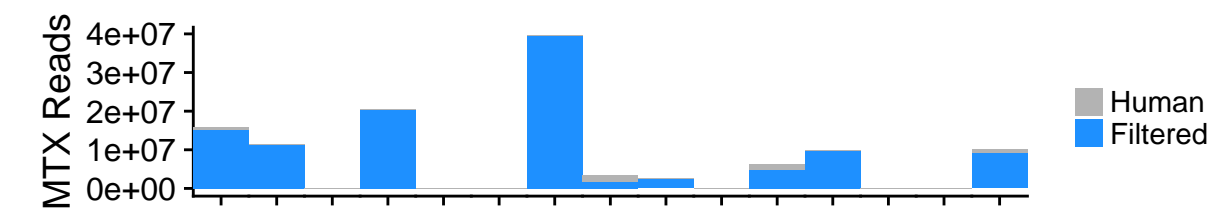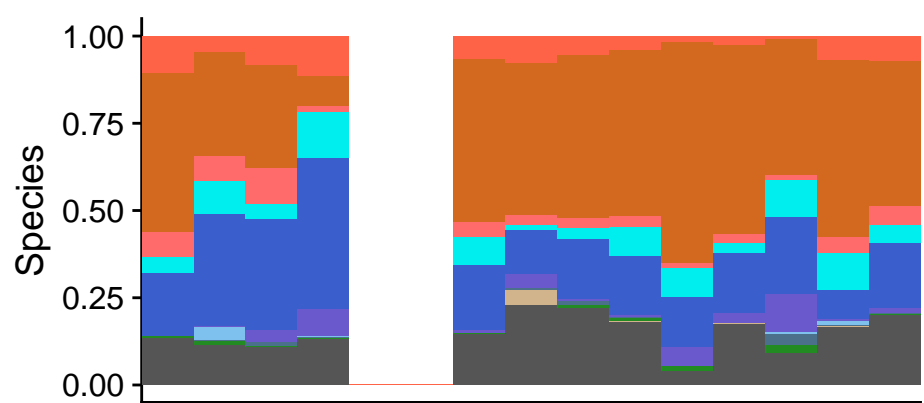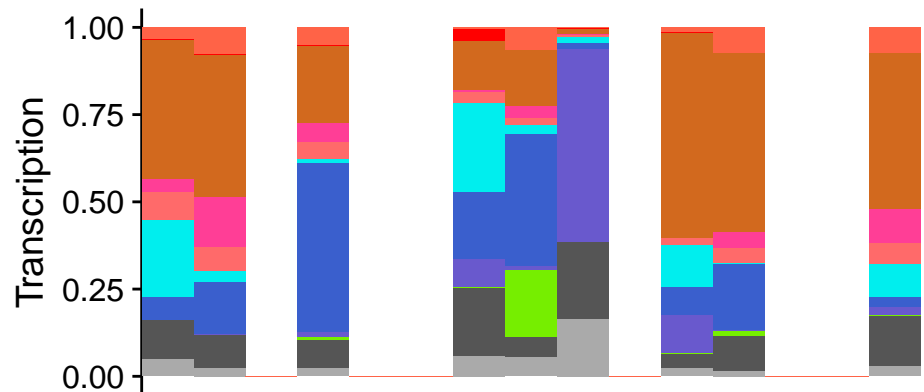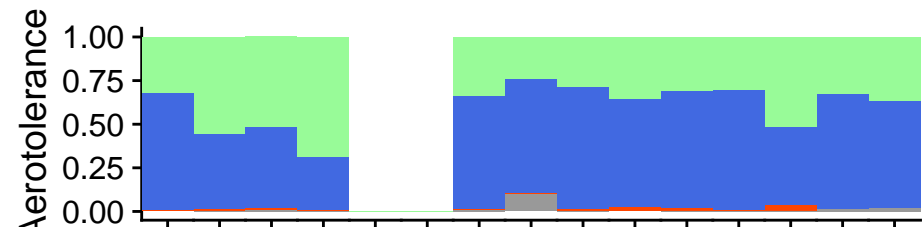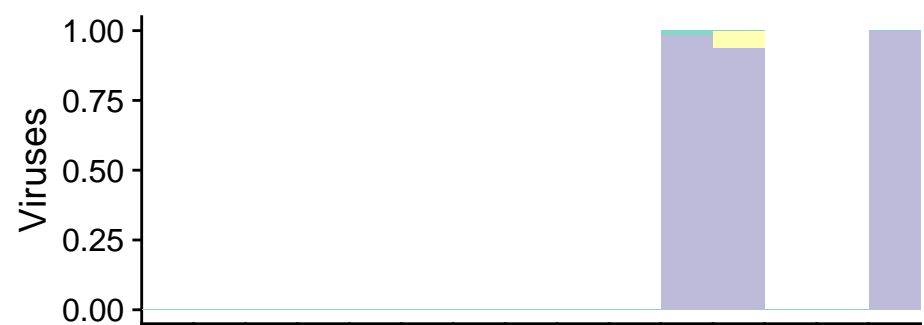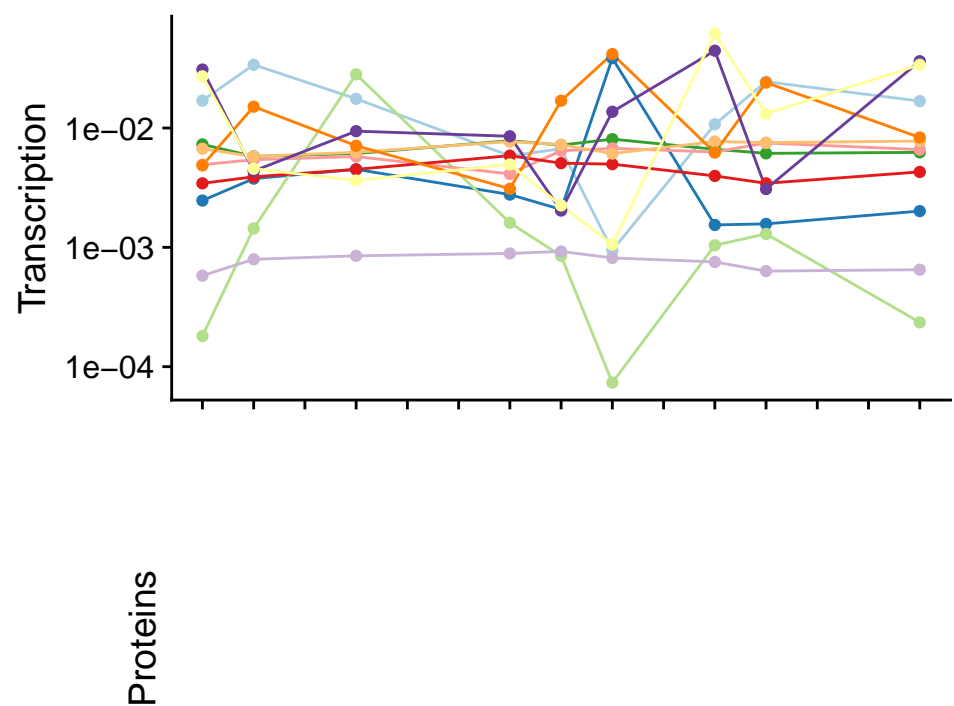

- Bacteroides ovatus*
- Bacteroides vulgatus*
- Parabacteroides distasonis*
- Eubacterium rectale*
- Faecalibacterium prausnitzii*
- Roseburia intestinalis*
- Roseburia hominis*
- Roseburia inulinivorans*
- Haemophilus parainfluenzae*
- C2likevirus unclassified*
- other

- Bacteroides ovatus*
- Bacteroides uniformis*
- Bacteroides vulgatus*
- Bacteroides xylanisolvans*
- Parabacteroides distasonis*
- Eubacterium rectale*
- Faecalibacterium prausnitzii*
- Roseburia intestinalis*
- Escherichia coli*
- other
- unclassified

- obligate anaerobe
- aerotolerant
- facultative anaerobe
- unknown

- T7virus
- unclassified Siphoviridae
- Pepper mild mottle virus

- K02078: acyl carrier protein
- K02110: F-type H<sup>+</sup>-transporting ATPase subunit
- K02745: PTS system, N-acetylgalactosamin...
- K02874: large subunit ribosomal protein L14
- K02904: large subunit ribosomal protein L29
- K02948: small subunit ribosomal protein S11
- K02965: small subunit ribosomal protein S19
- K03088: RNA polymerase sigma-70 factor, E...
- K03544: ATP-dependent Clp protease ATP...
- K04078: chaperonin GroES
- K13993: HSP20 family protein

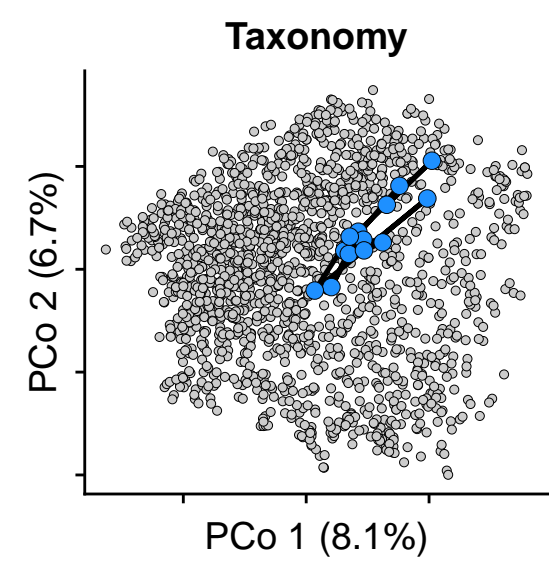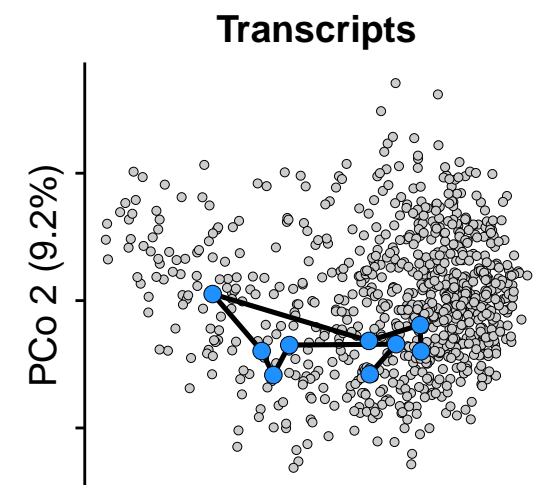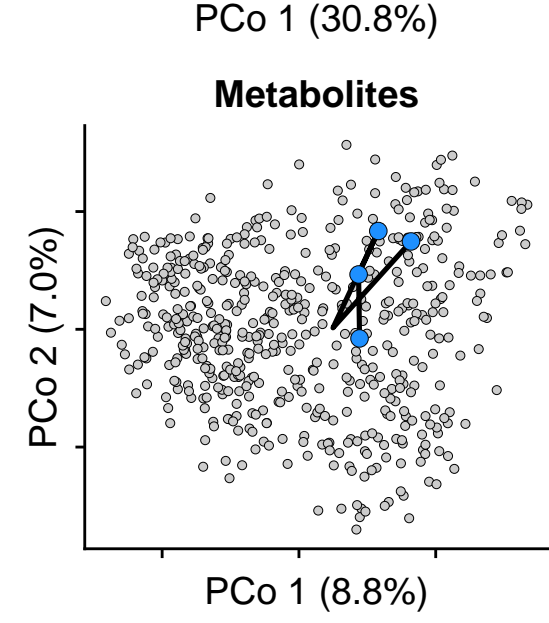

# E5002: 15 Female Black or African American Emory | nonIBD

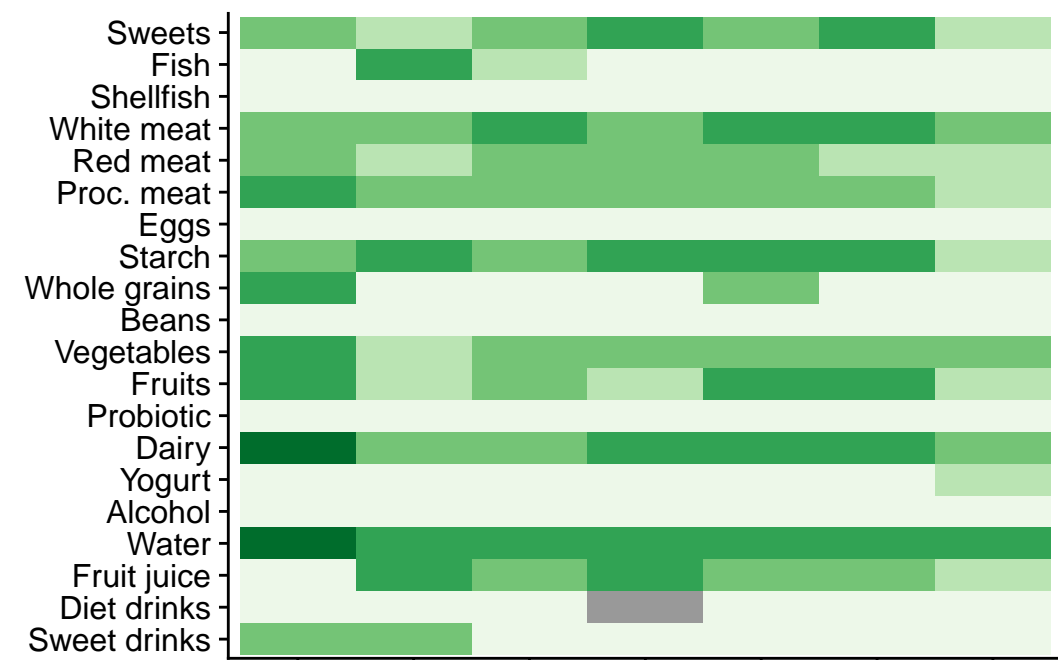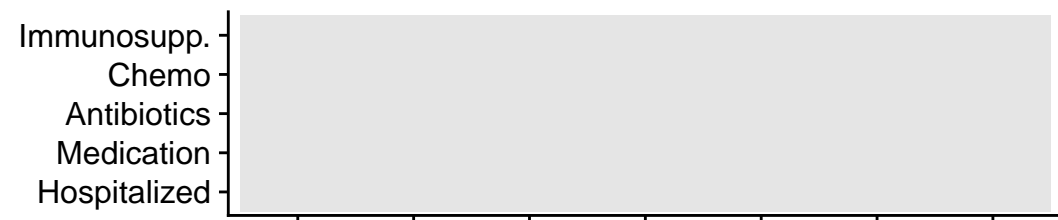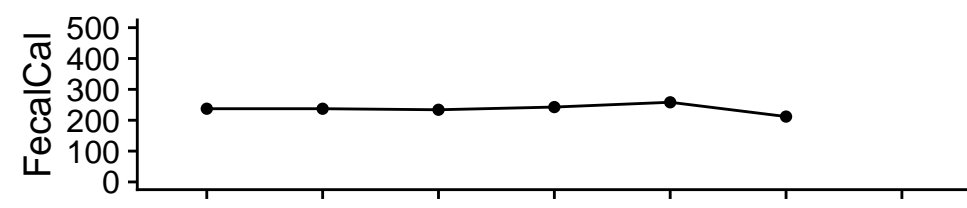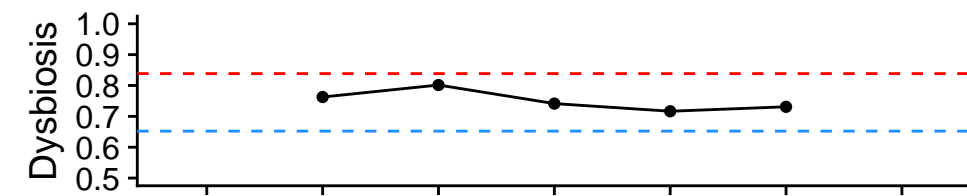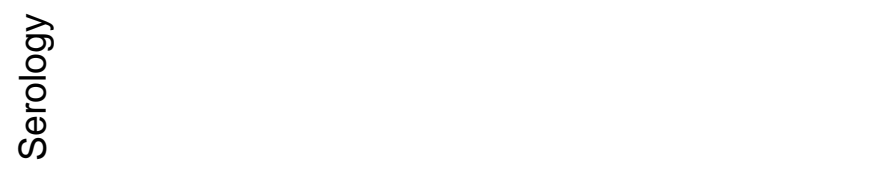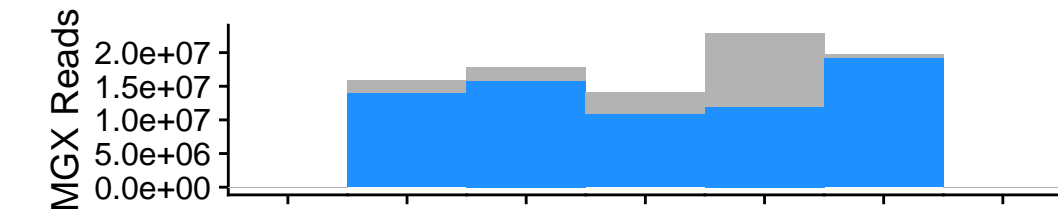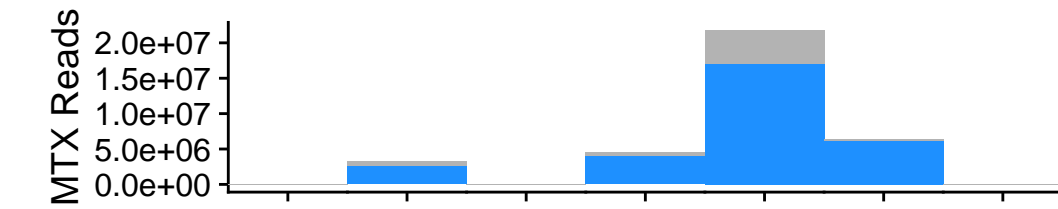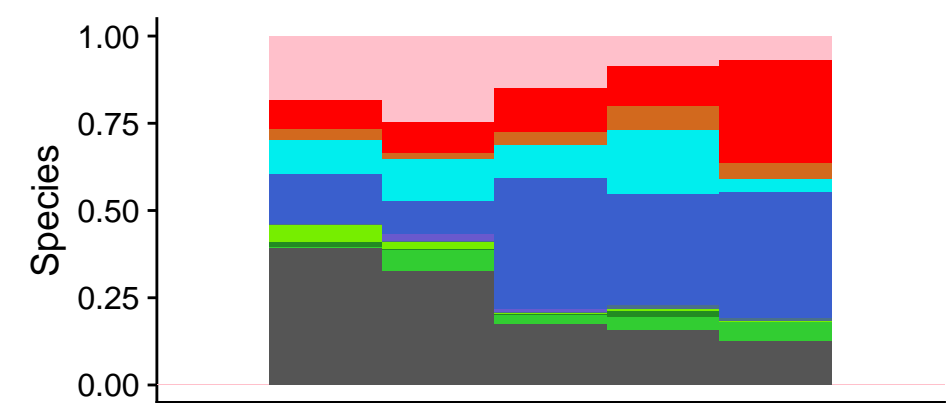

- Bacteroides fragilis*
- Bacteroides uniformis*
- Bacteroides vulgatus*
- Eubacterium rectale*
- Faecalibacterium prausnitzii*
- Roseburia intestinalis*
- Roseburia inulinivorans*
- Escherichia coli*
- Haemophilus parainfluenzae*
- Sutterella wadsworthensis*
- other

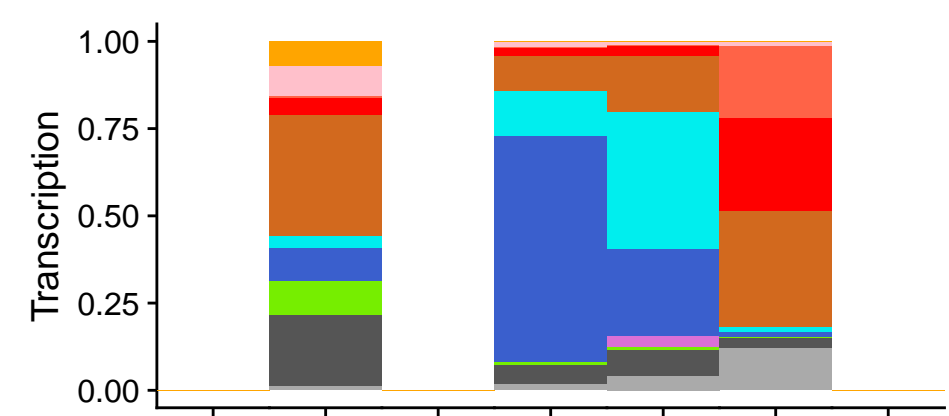

- Bacteroides dorei*
- Bacteroides fragilis*
- Bacteroides ovatus*
- Bacteroides uniformis*
- Bacteroides vulgatus*
- Eubacterium rectale*
- Faecalibacterium prausnitzii*
- Lachnospiraceae bacterium 5 1 63FAA*
- Escherichia coli*
- other
- unclassified

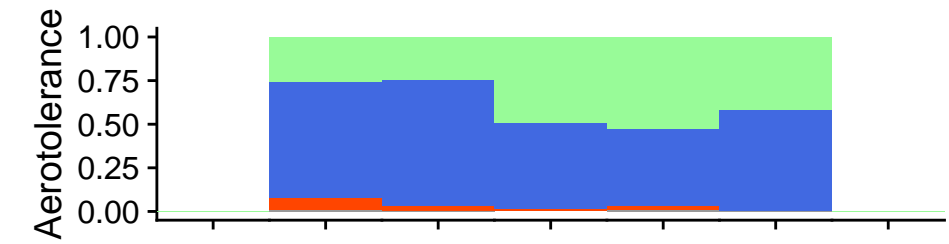

- obligate anaerobe
- aerotolerant
- facultative anaerobe
- unknown

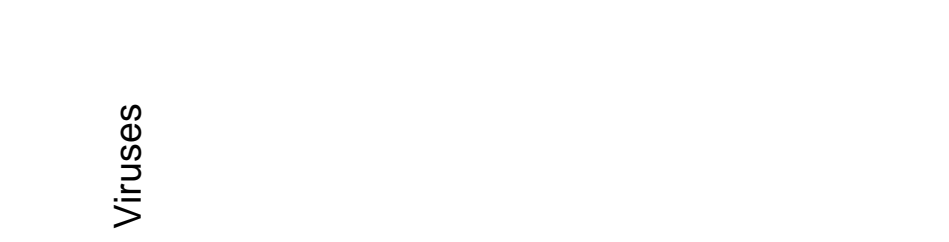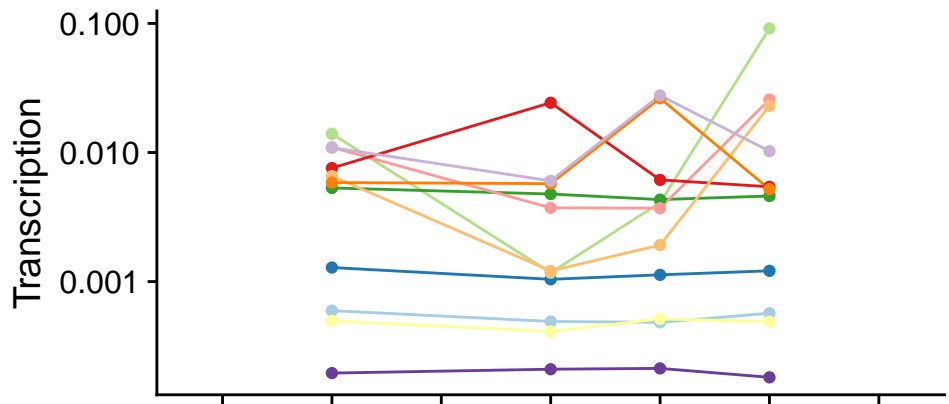

- K00973: glucose-1-phosphate thymidyltra...
- K01876: aspartyl-tRNA synthetase [EC:6.1.1...
- K02078: acyl carrier protein
- K02959: small subunit ribosomal protein S16
- K02968: small subunit ribosomal protein S20
- K03040: DNA-directed RNA polymerase sub...
- K03088: RNA polymerase sigma-70 factor, E...
- K04077: chaperonin GroEL
- K04078: chaperonin GroES
- K06153: undecaprenyl-diphosphatase [EC:3....
- K09761: ribosomal RNA small subunit methyl...

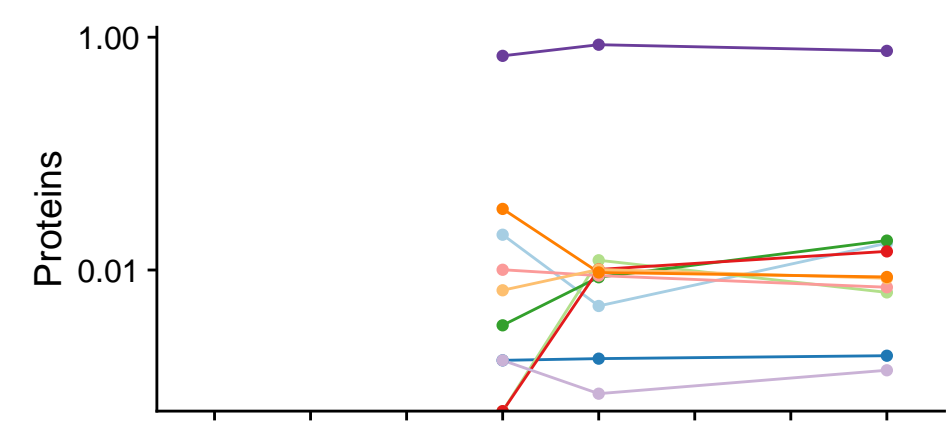

- K00262: glutamate dehydrogenase (NADP+) ...
- K00789: S-adenosylmethionine synthetase [...
- K00831: phosphoserine aminotransferase [E...
- K01610: phosphoenolpyruvate carboxykinase...
- K01803: triphosphate isomerase (TIM) [E...
- K01805: xylose isomerase [EC:5.3.1.5]
- K01812: glucuronate isomerase [EC:5.3.1.12]
- K10117: raffinose/stachyose/melibiose transp...
- K15580: oligopeptide transport substr...
- UNGROUPED

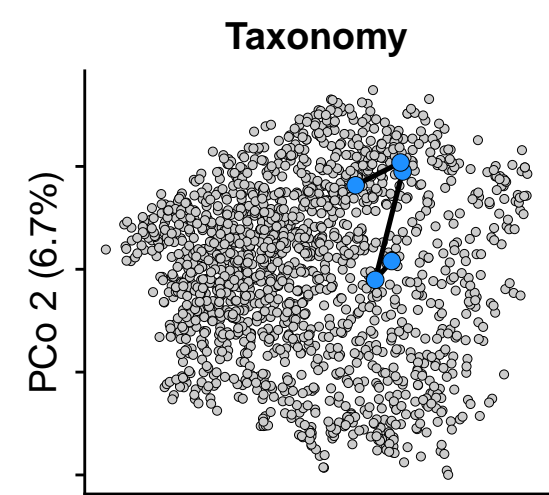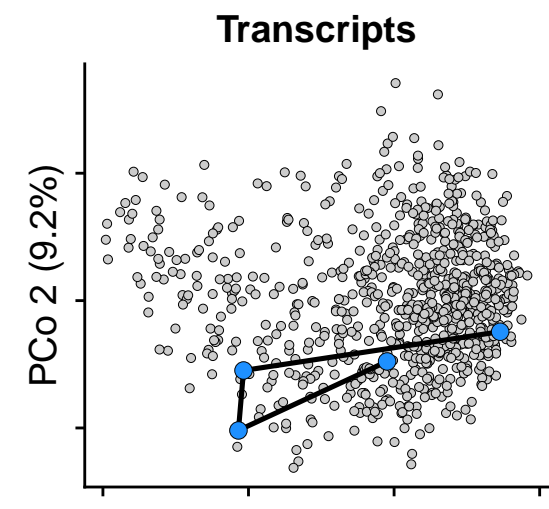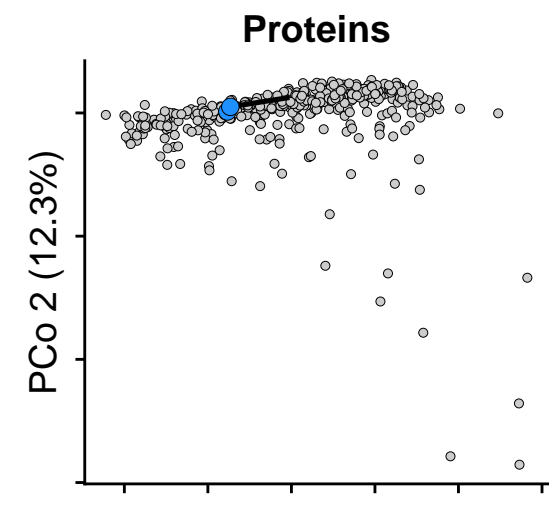

# E5004: 7 Female Black or African American Emory | UC

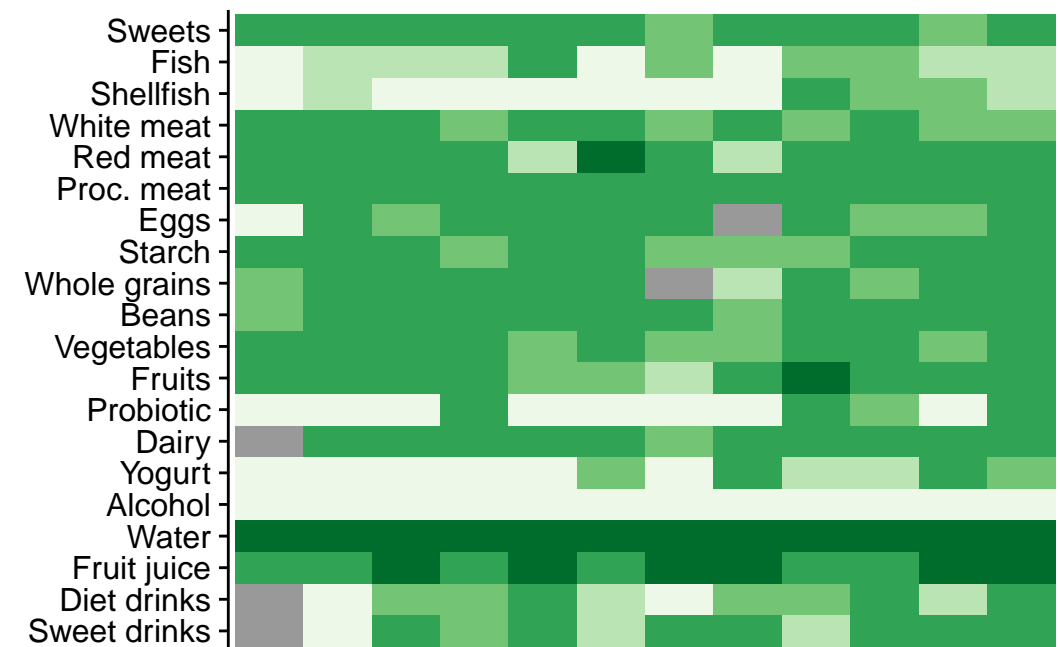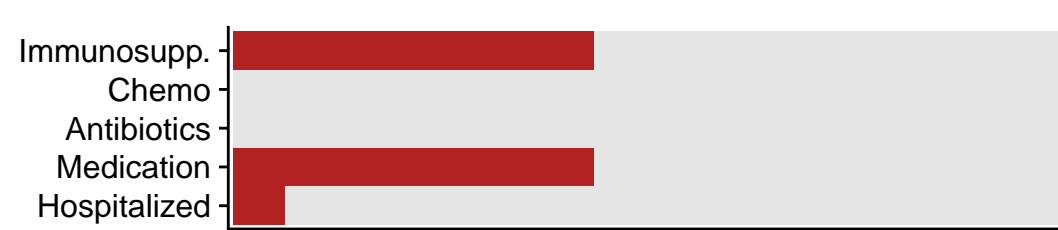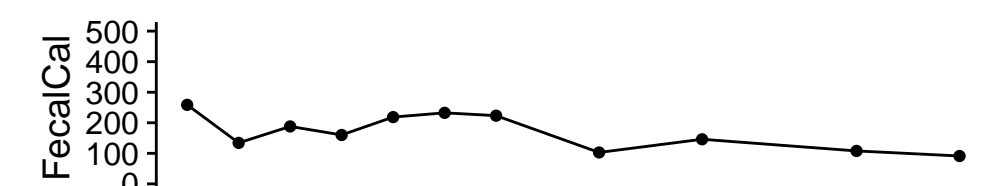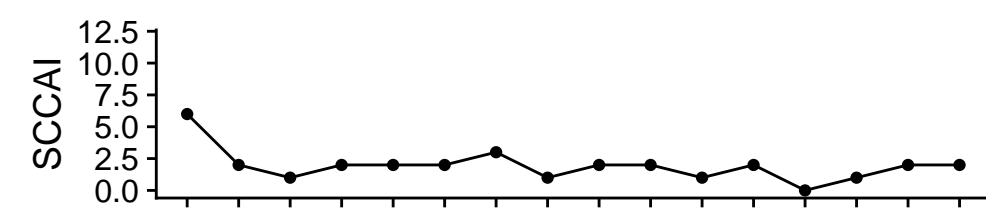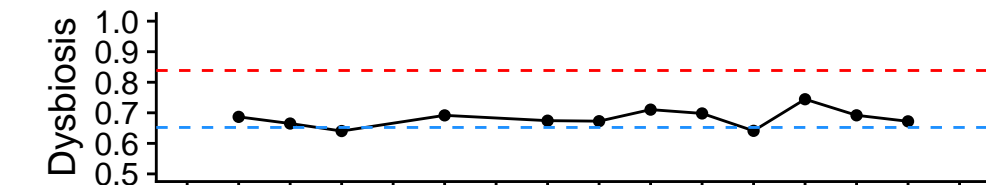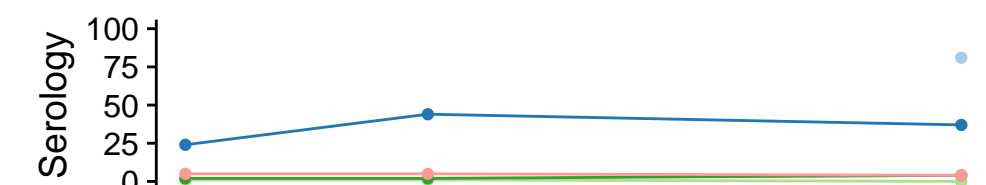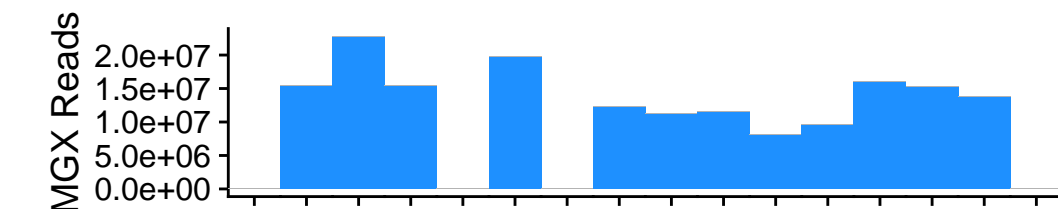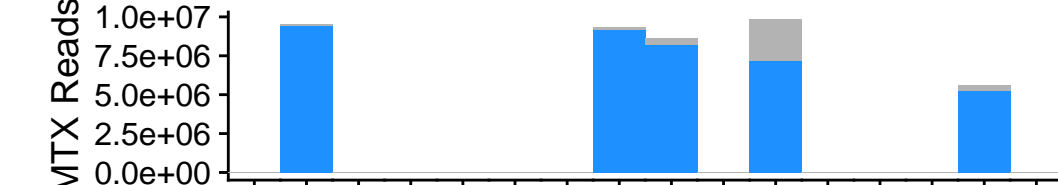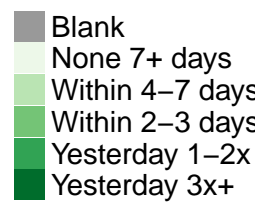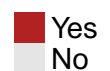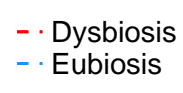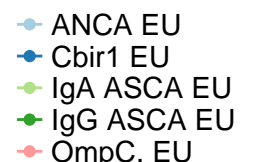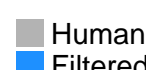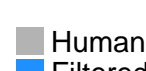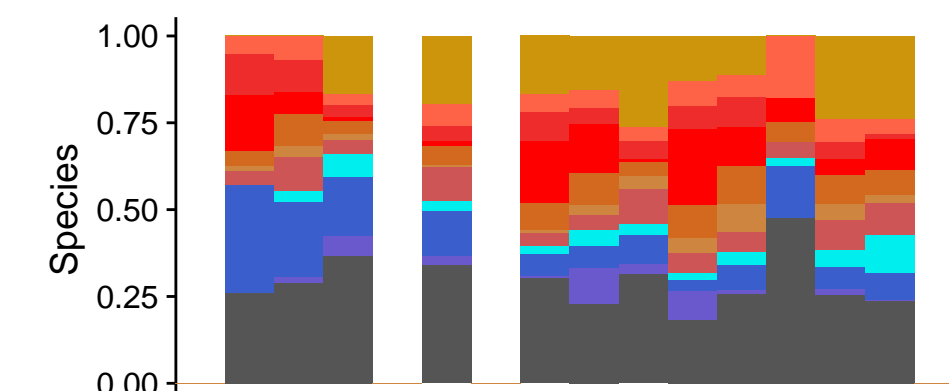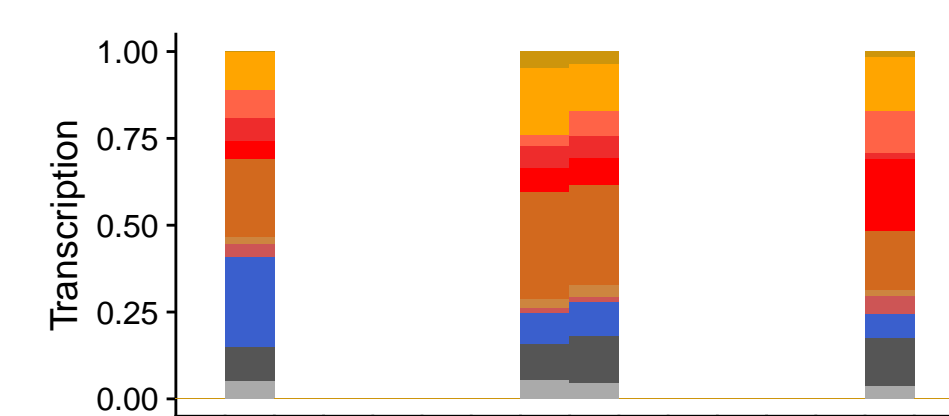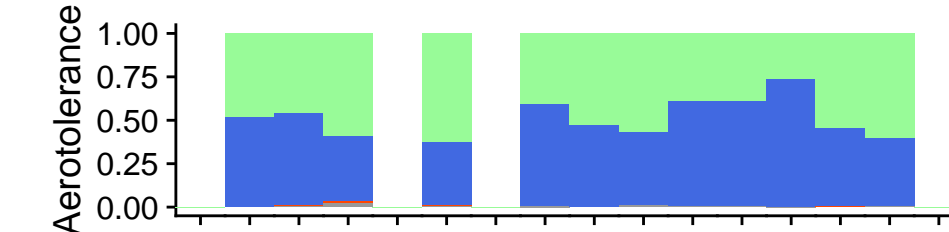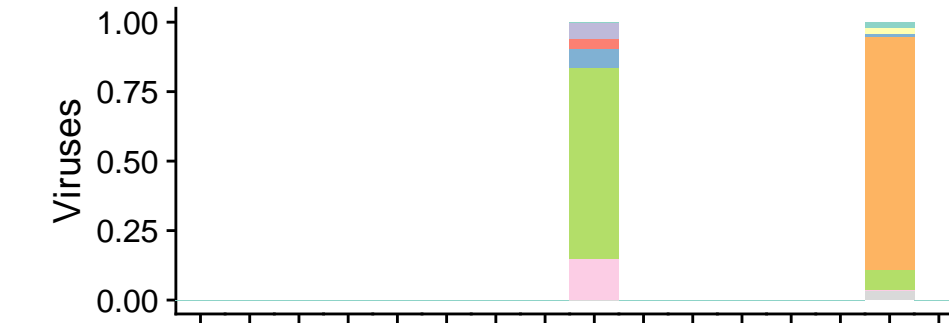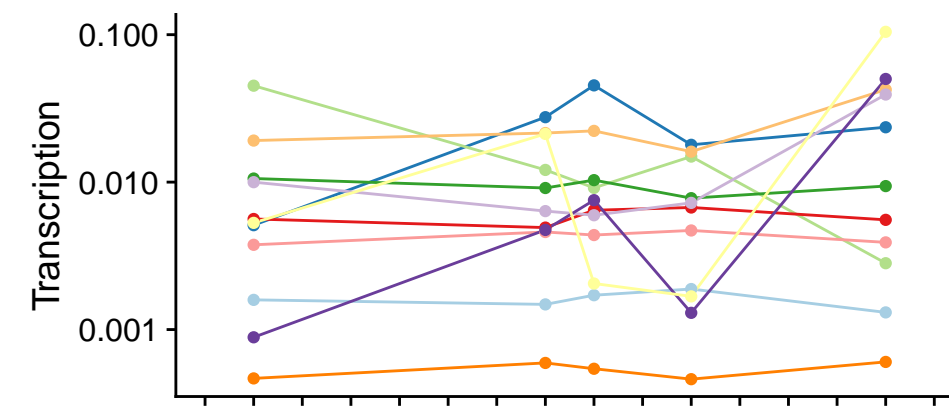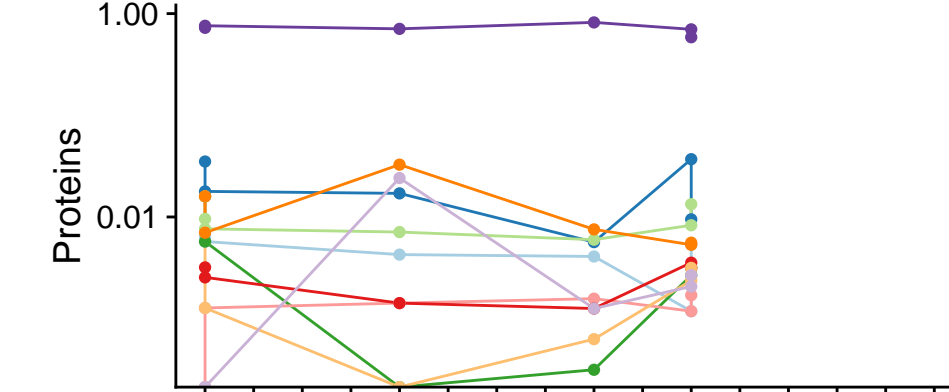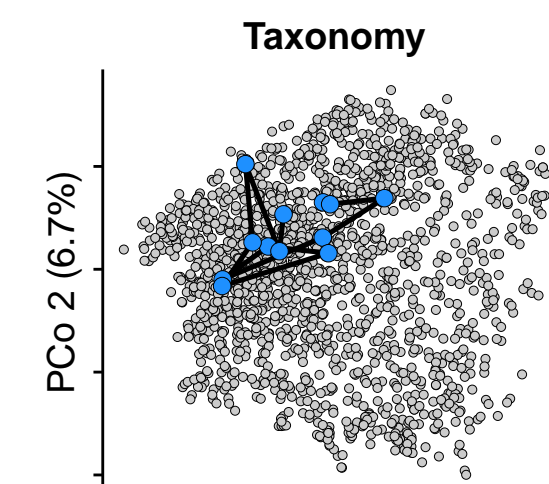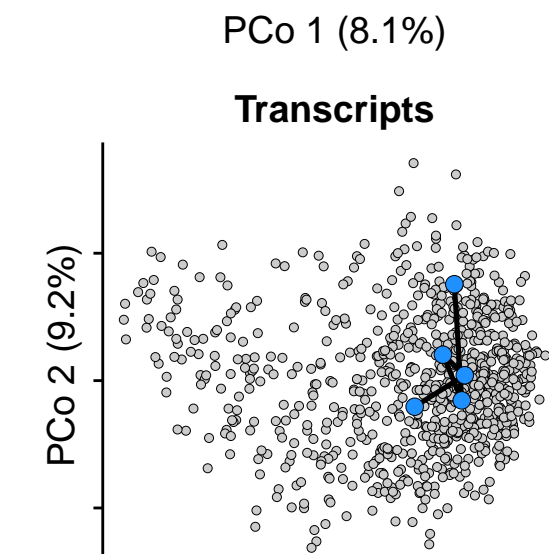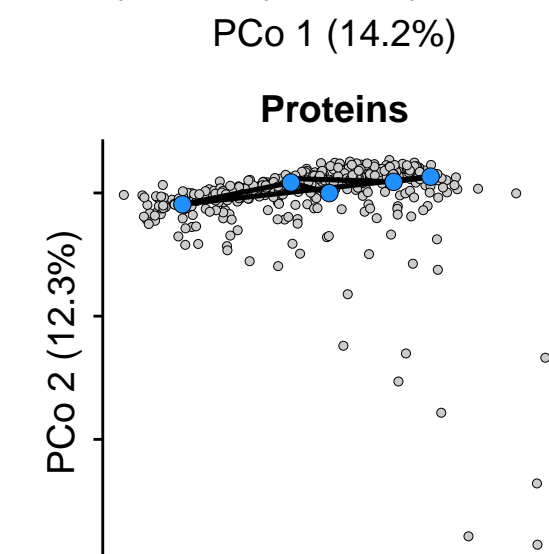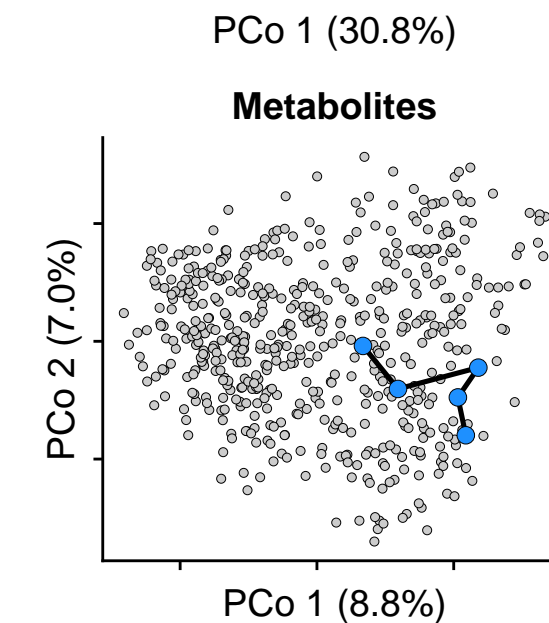



E5006: NA Male Black or African American Emory | CD

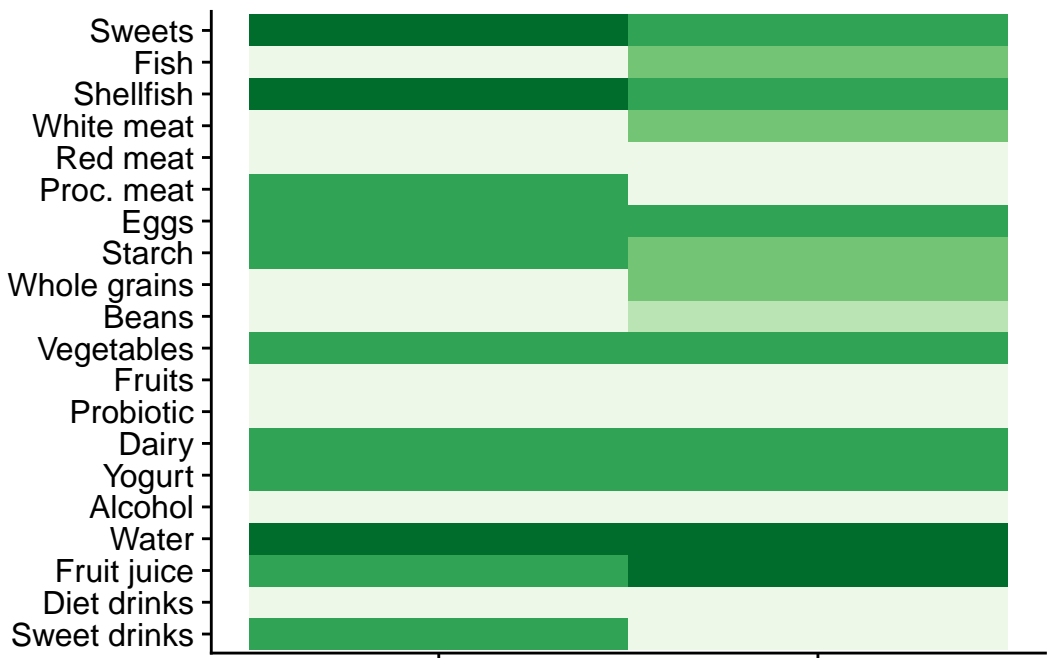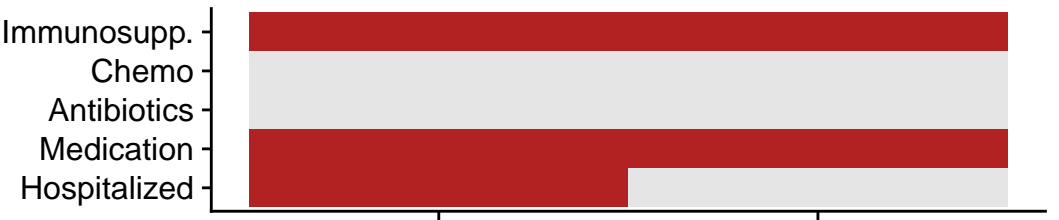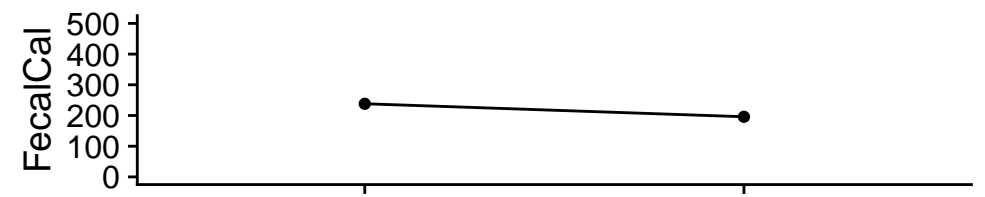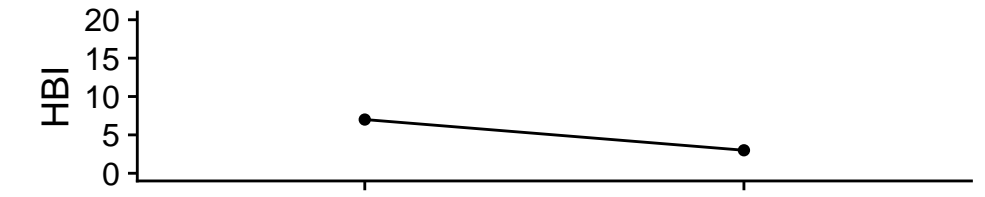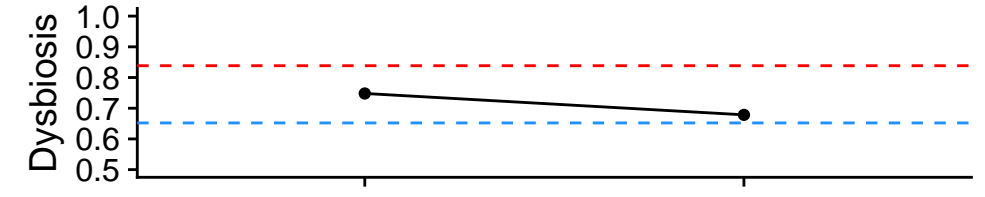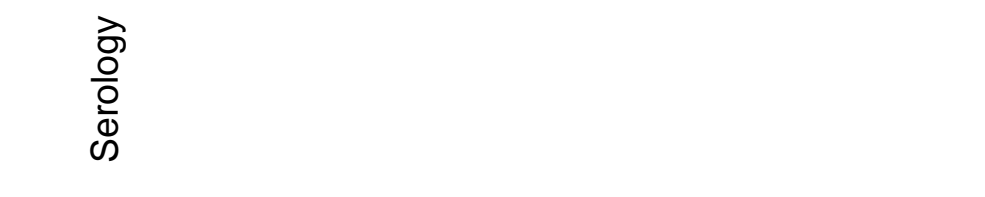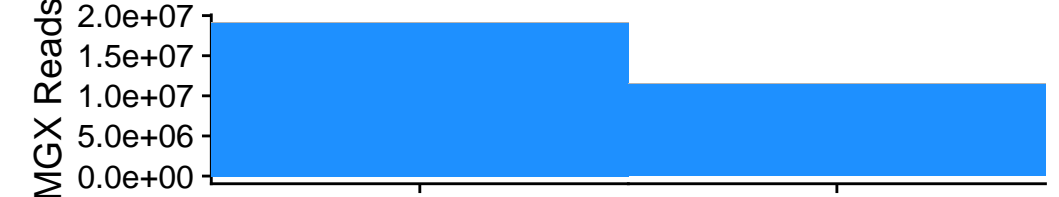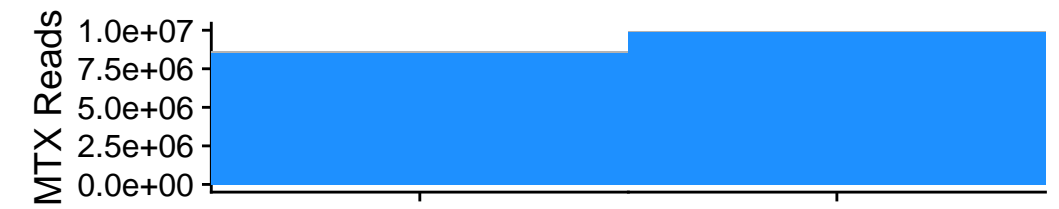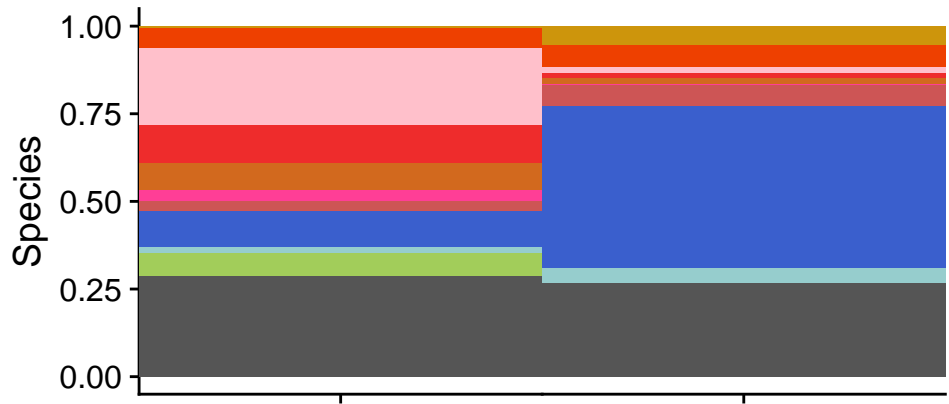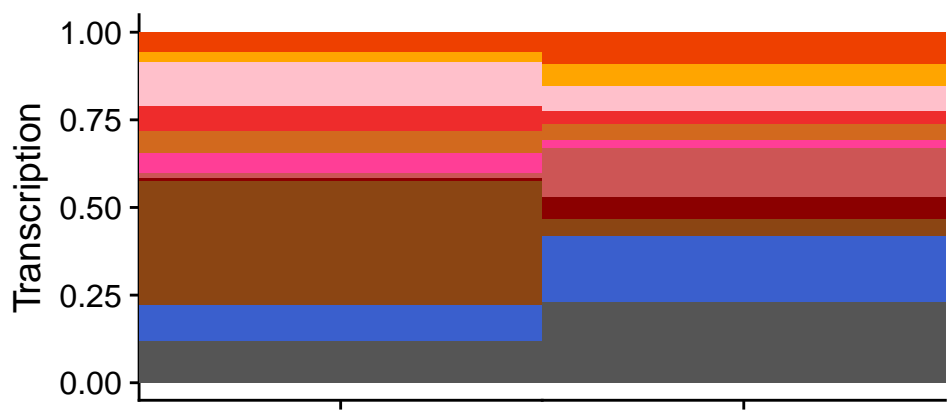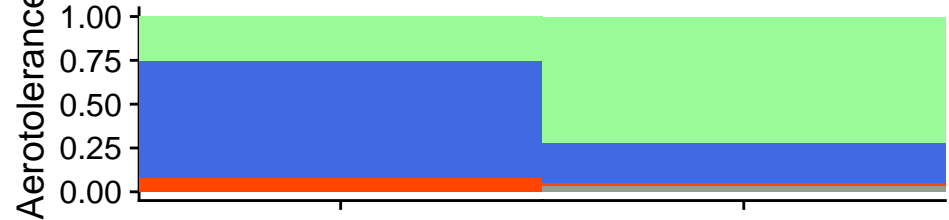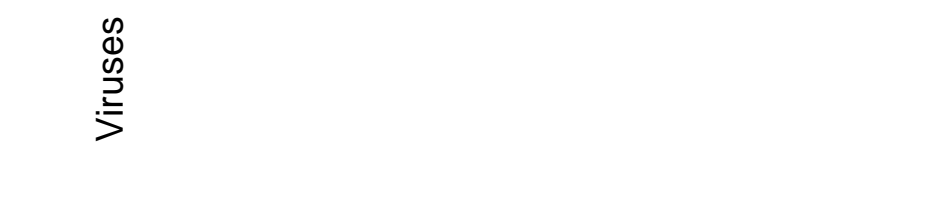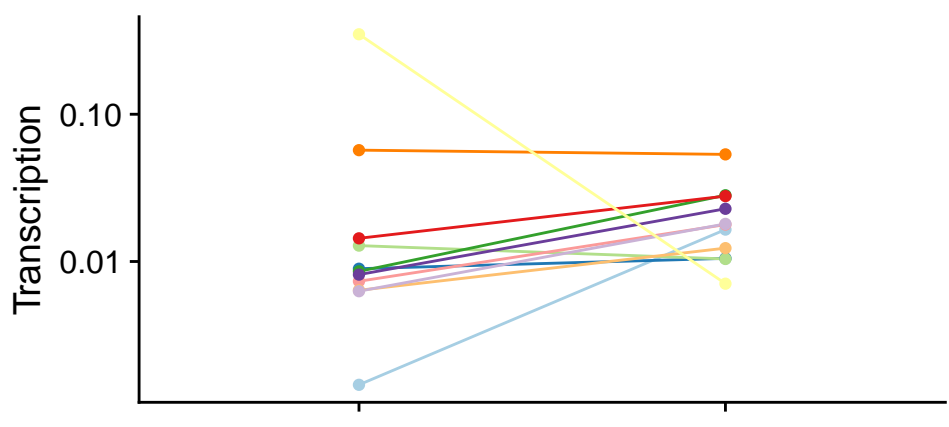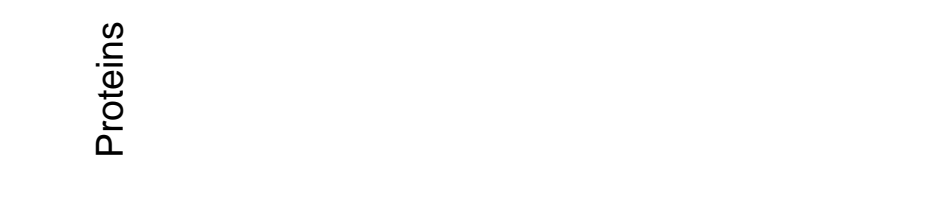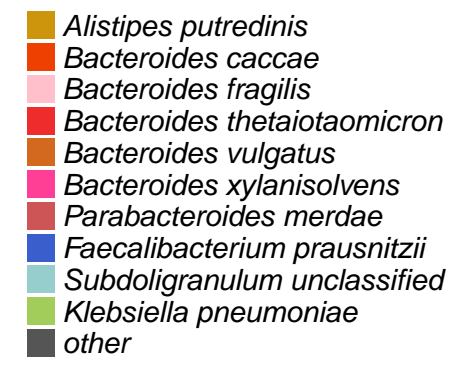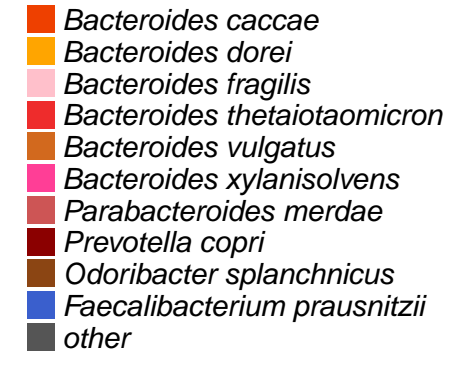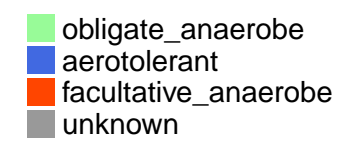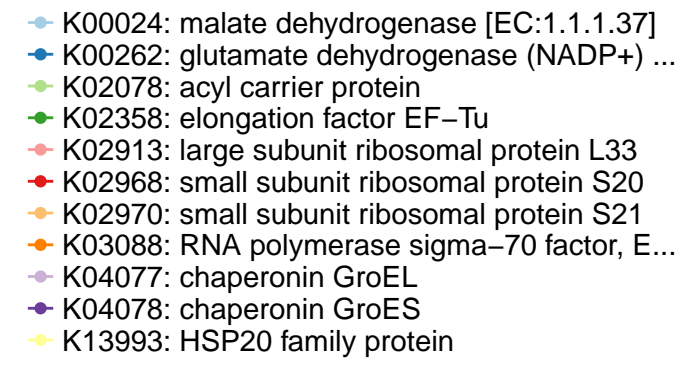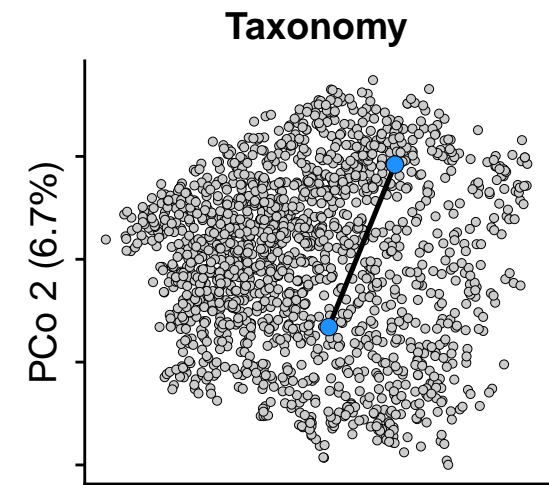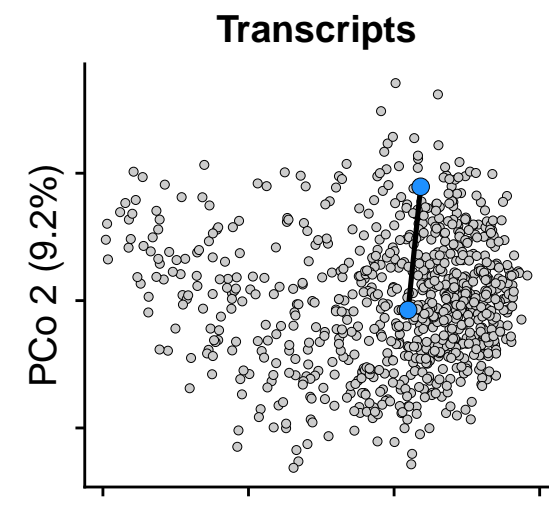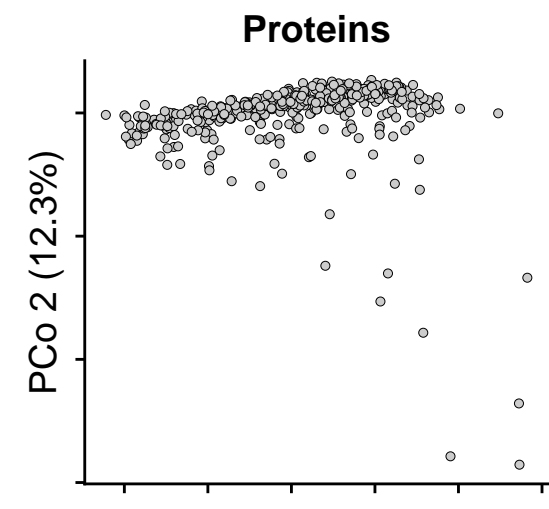

# E5008: 13 Male Black or African American Emory | UC

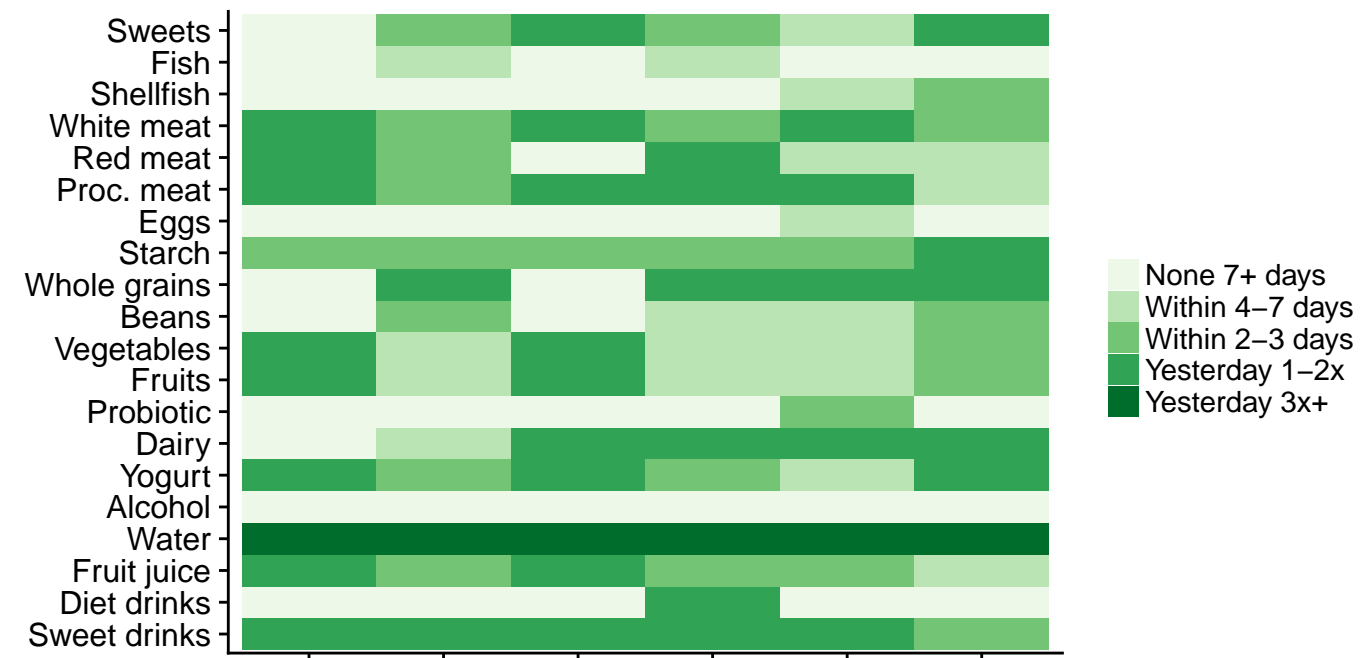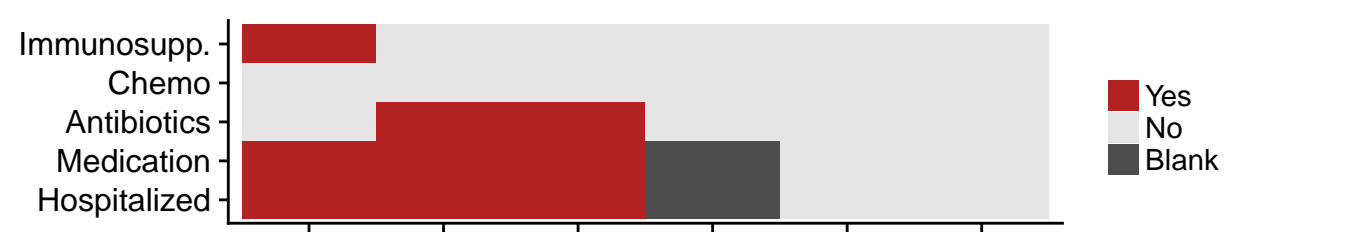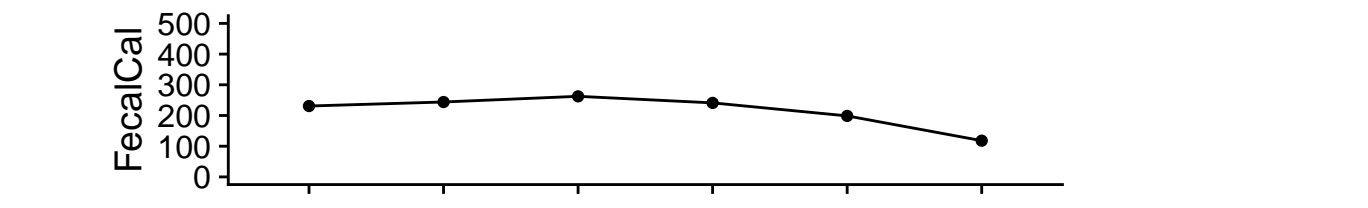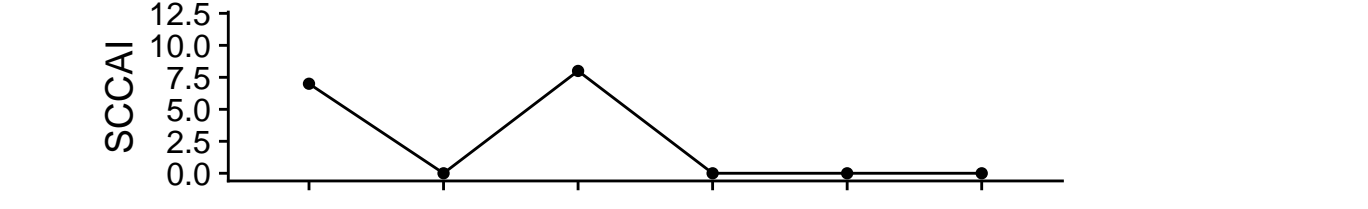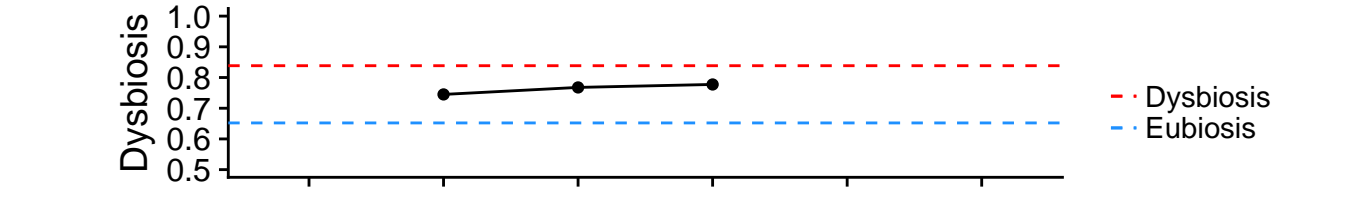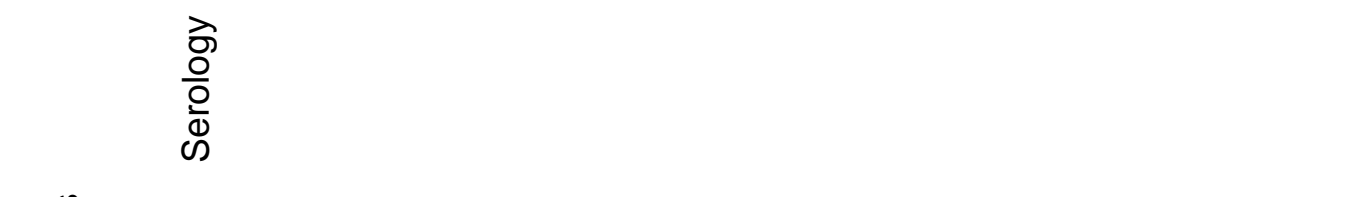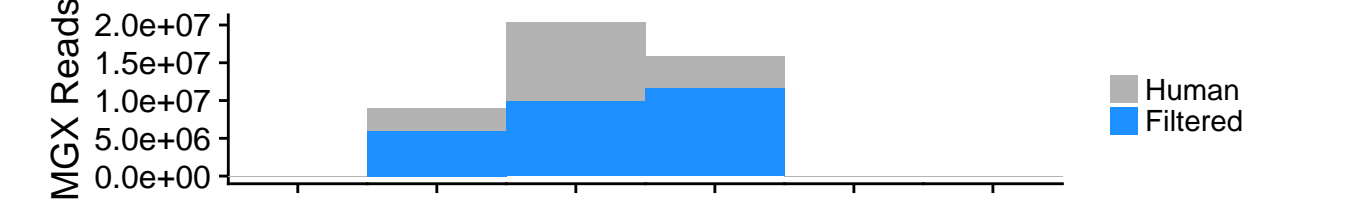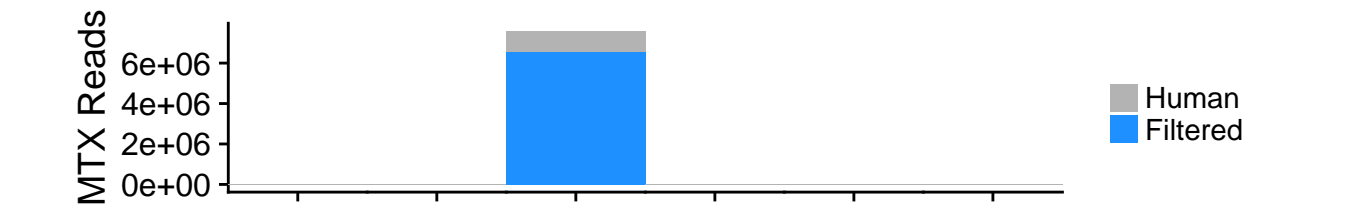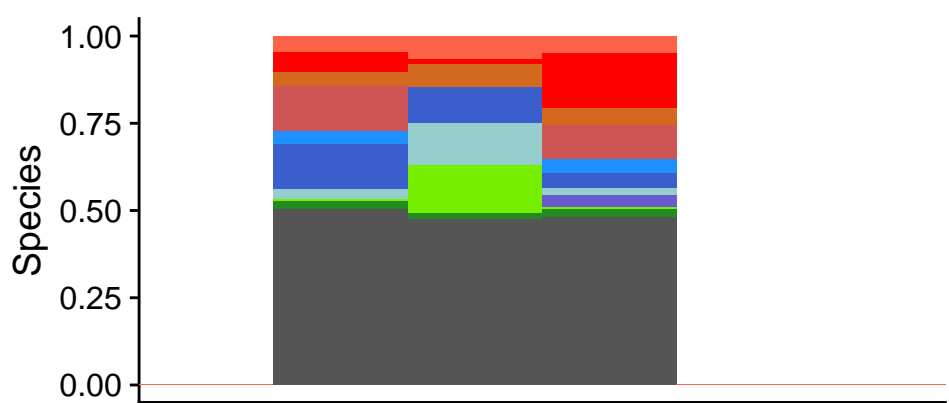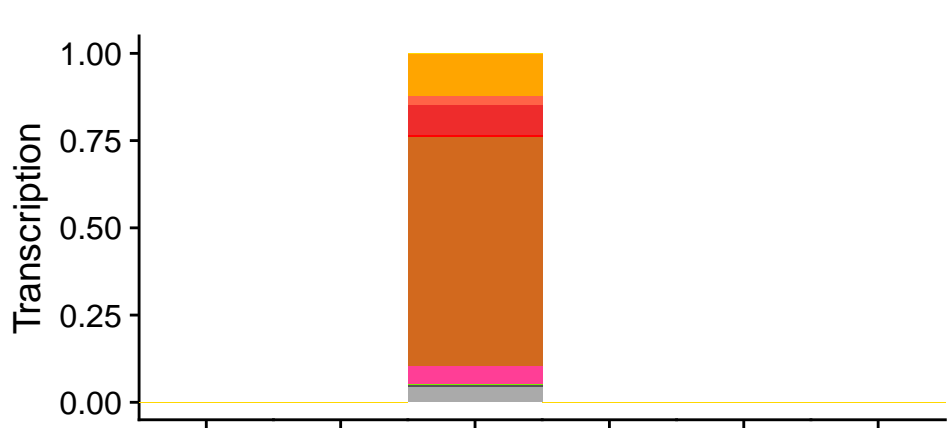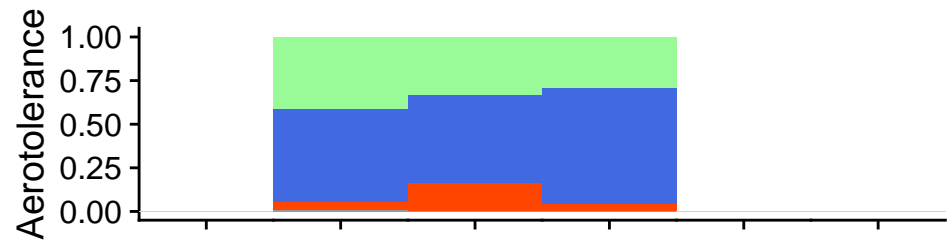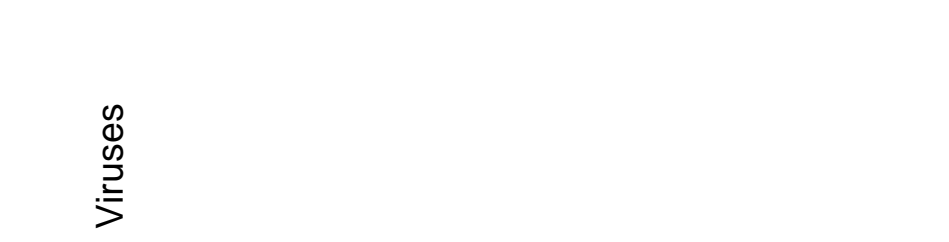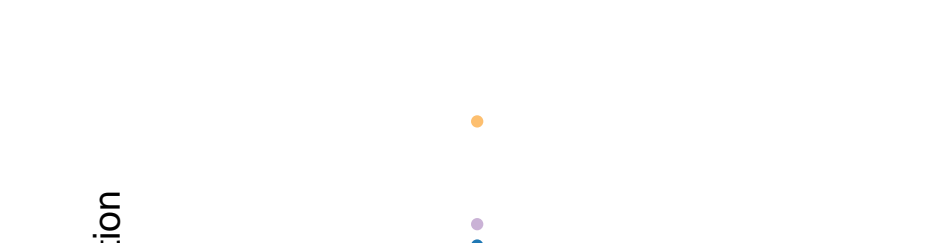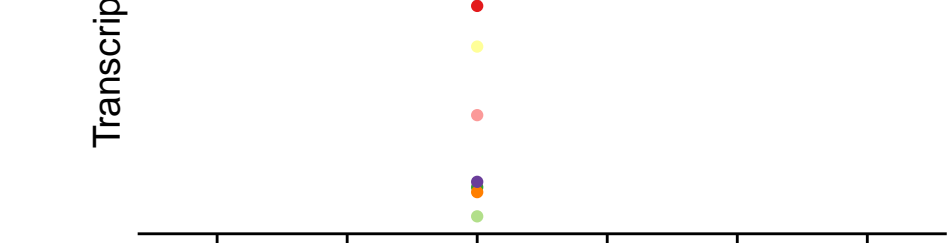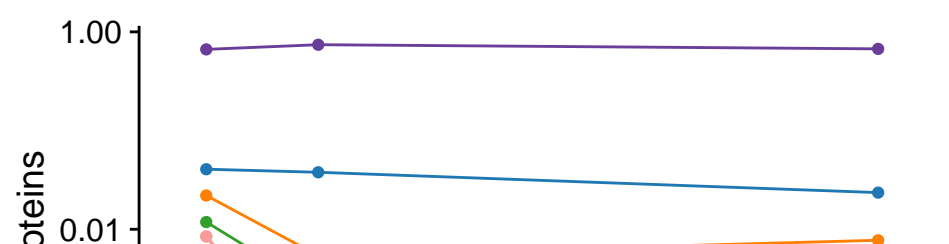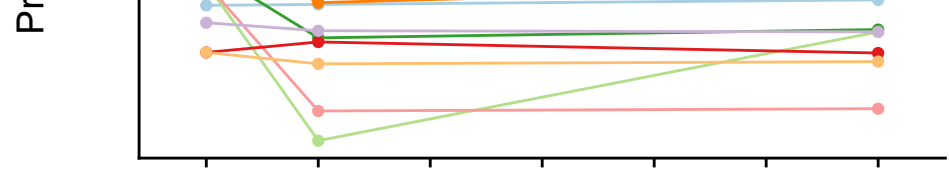

- Bacteroides ovatus
- Bacteroides uniformis
- Bacteroides vulgatus
- Parabacteroides merdae
- Eubacterium eligens
- Faecalibacterium prausnitzii
- Subdoligranulum unclassified
- Roseburia intestinalis
- Escherichia coli
- Haemophilus parainfluenzae
- other

- Alistipes onderdonkii
- Bacteroides dorei
- Bacteroides ovatus
- Bacteroides thetaiotaomicron
- Bacteroides uniformis
- Bacteroides vulgatus
- Bacteroides xylanisolvens
- Faecalibacterium prausnitzii
- Escherichia coli
- other
- unclassified

- obligate anaerobe
- aerotolerant
- facultative anaerobe
- unknown

- K02078: acyl carrier protein
- K02358: elongation factor EF-Tu
- K02886: large subunit ribosomal protein L2
- K02890: large subunit ribosomal protein L22
- K02919: large subunit ribosomal protein L36
- K02935: large subunit ribosomal protein L7/L...
- K02968: small subunit ribosomal protein S20
- K02970: small subunit ribosomal protein S21
- K02982: small subunit ribosomal protein S3
- K02992: small subunit ribosomal protein S7
- K04078: chaperonin GroES

- K00134: glyceraldehyde 3-phosphate dehydr...
- K00262: glutamate dehydrogenase (NADP+) ...
- K01689: enolase [EC:4.2.1.11]
- K02867: large subunit ribosomal protein L11
- K02879: large subunit ribosomal protein L17
- K02982: small subunit ribosomal protein S3
- K03695: ATP-dependent Clp protease ATP-...
- K04043: molecular chaperone DnaK
- K07175: PhoH-like ATPase
- UNGROUPED

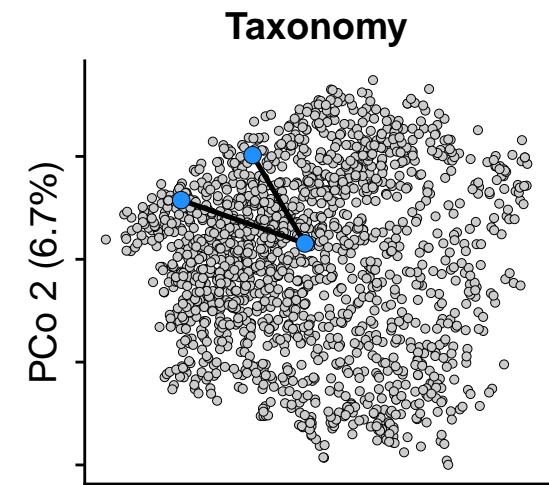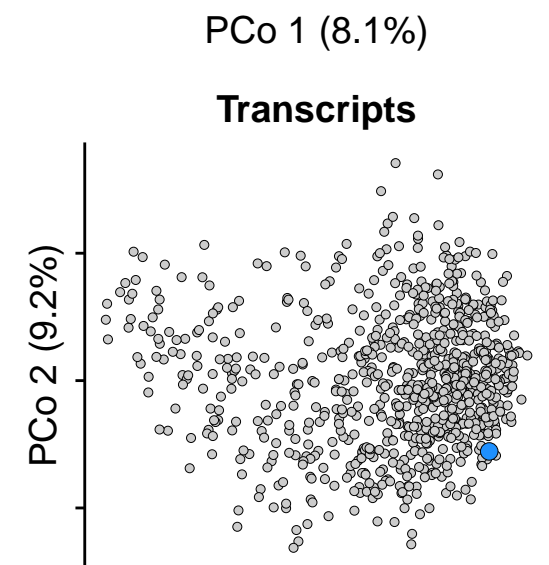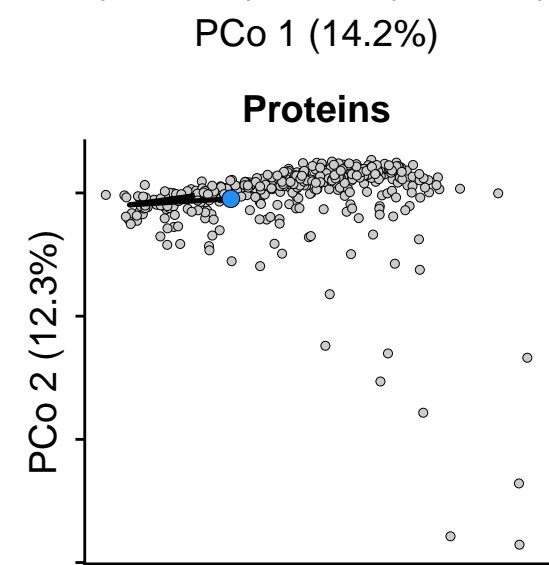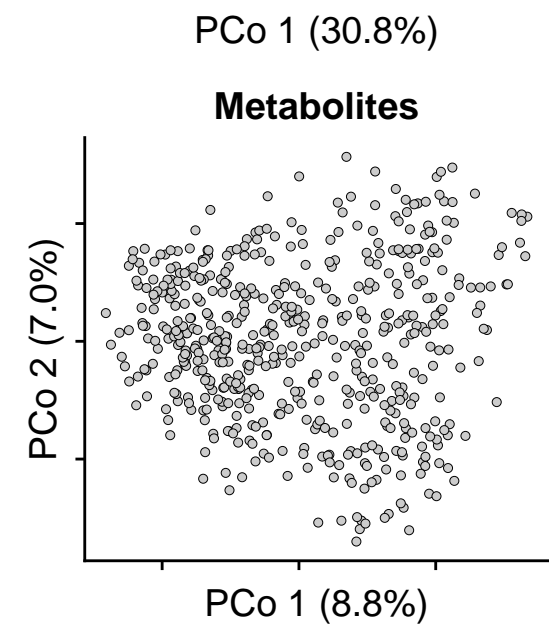

# E5009: 17 Female White Emory | CD L1

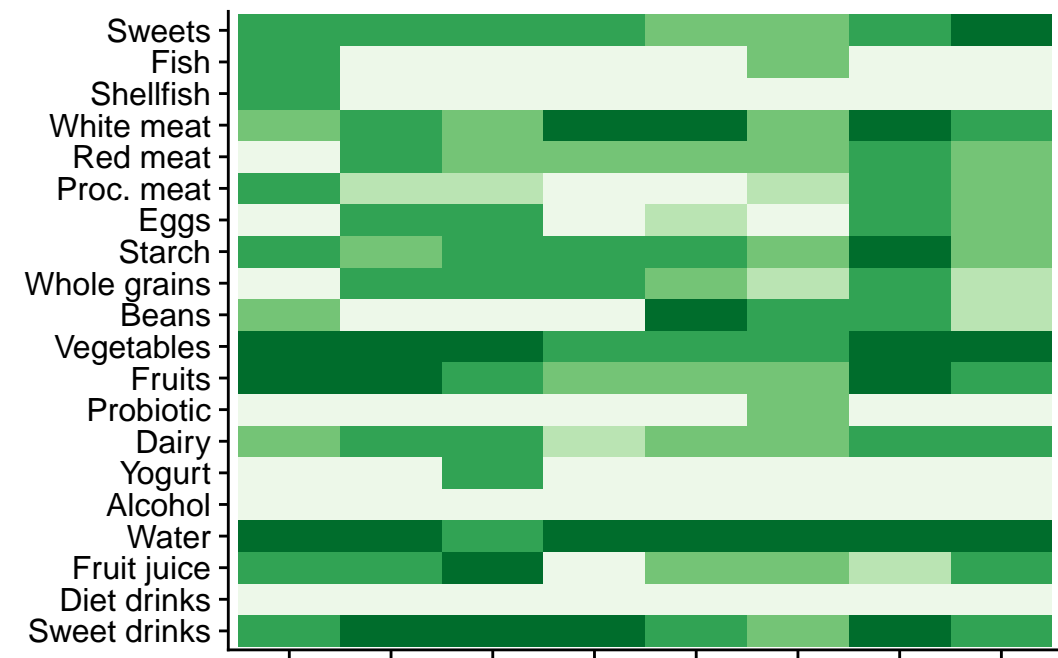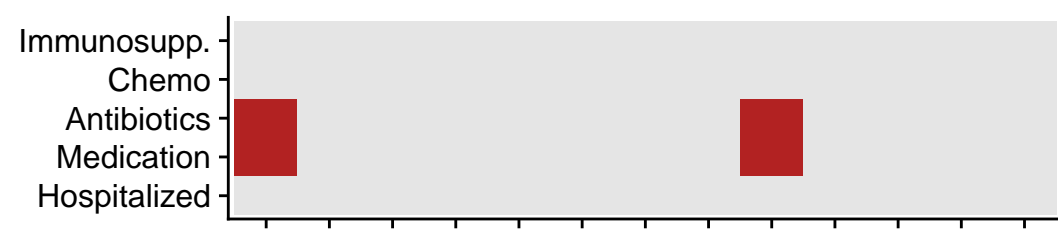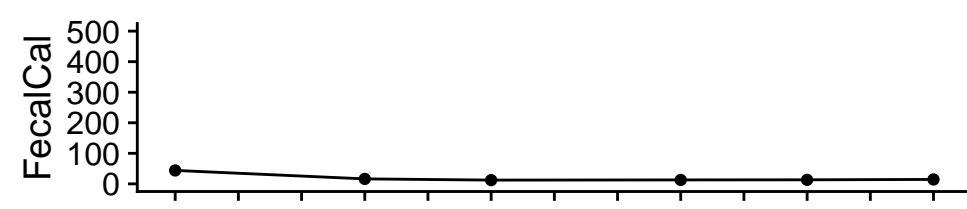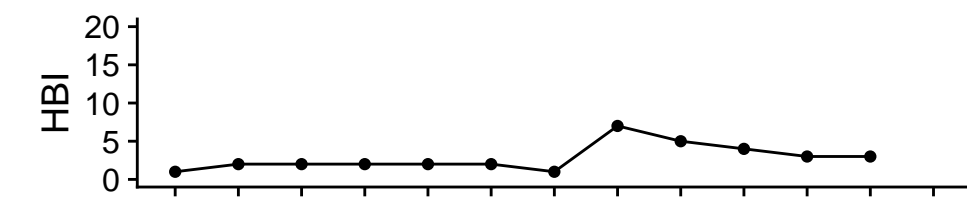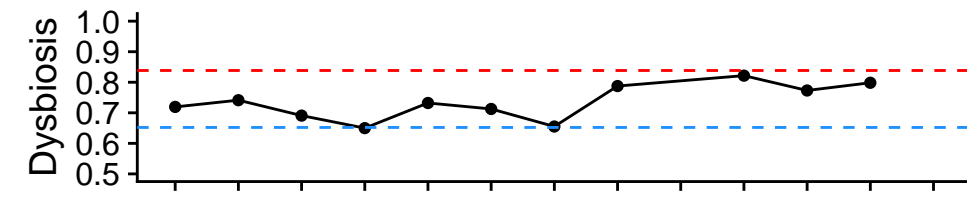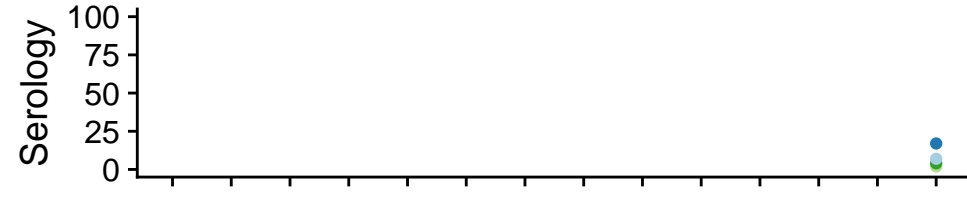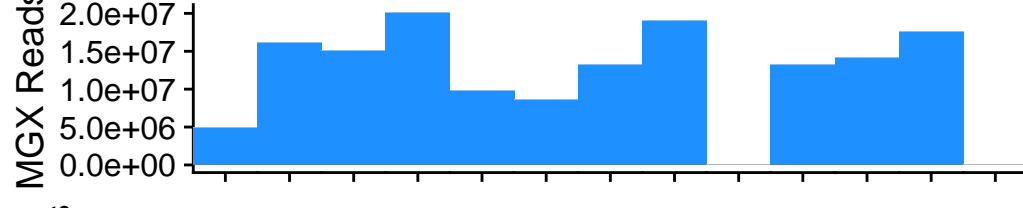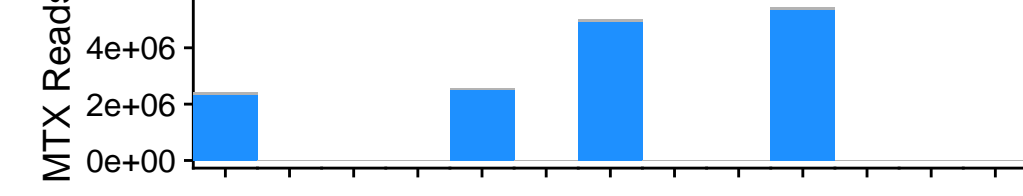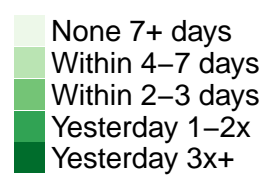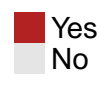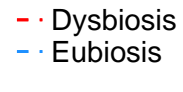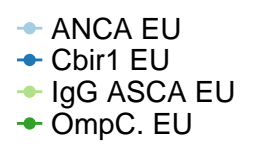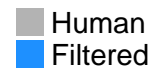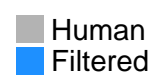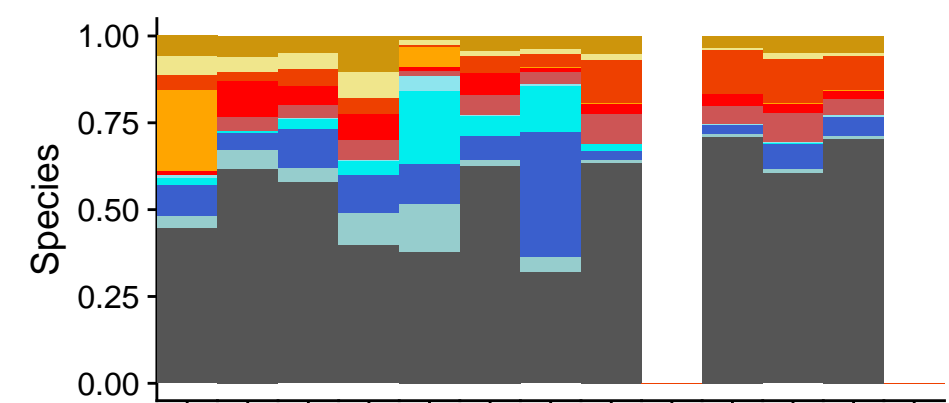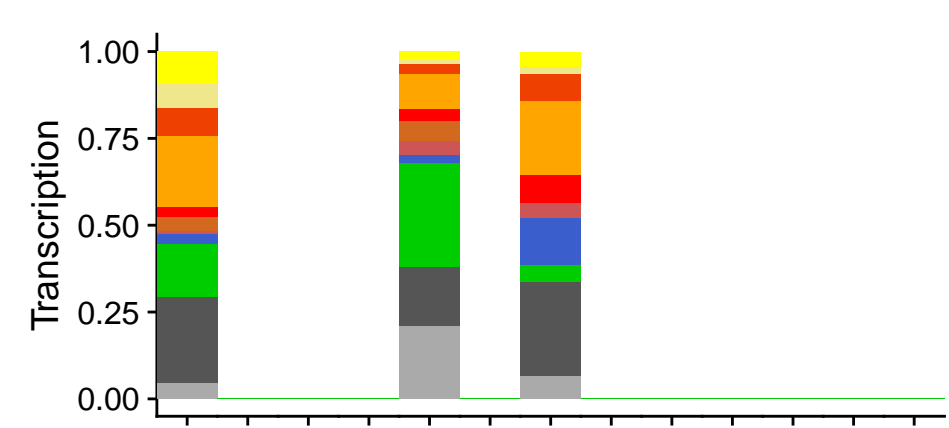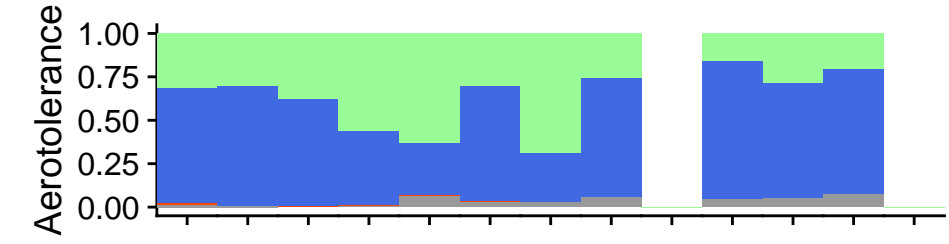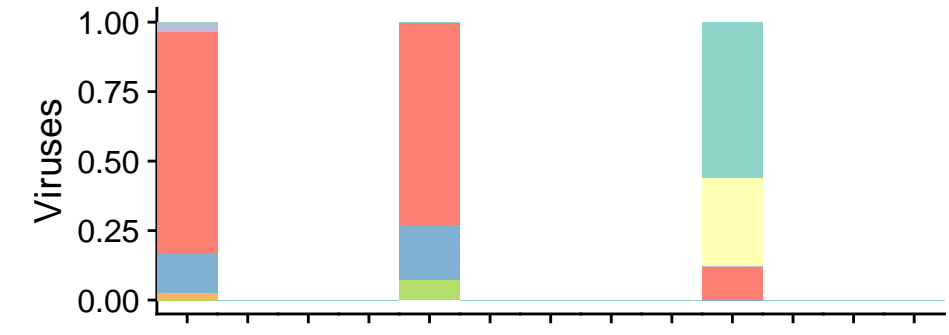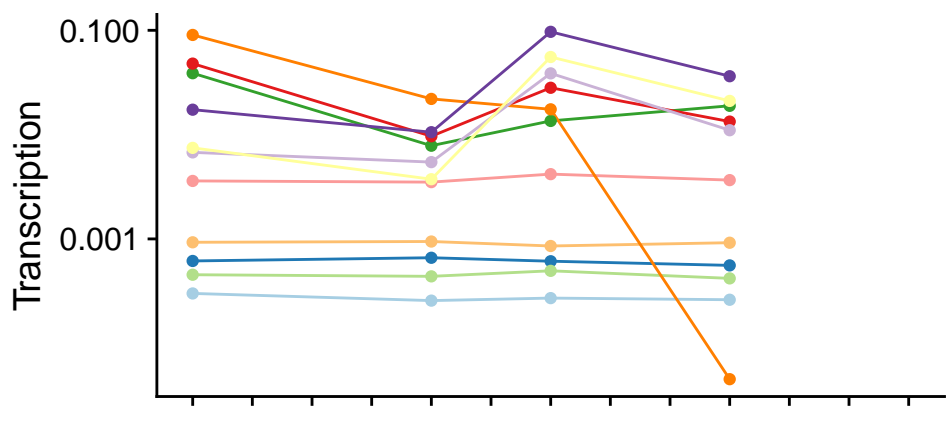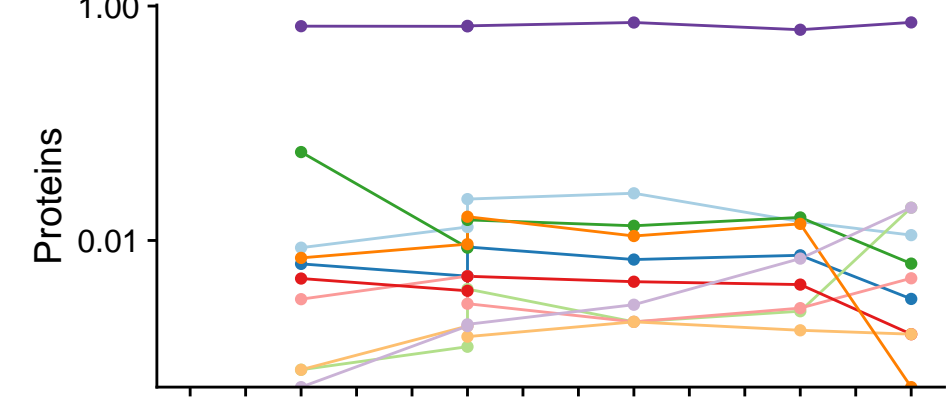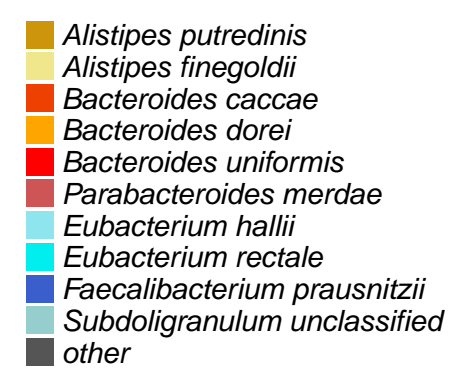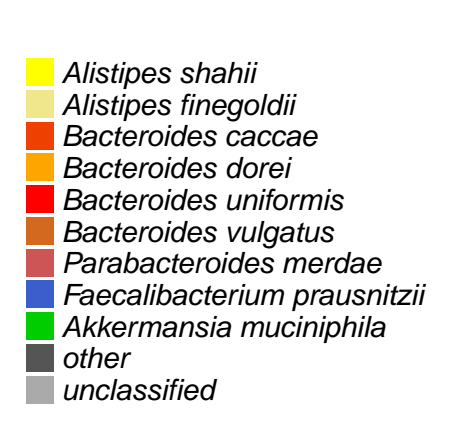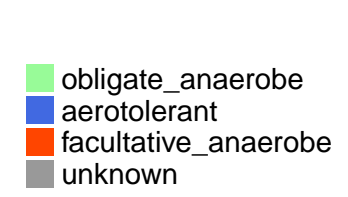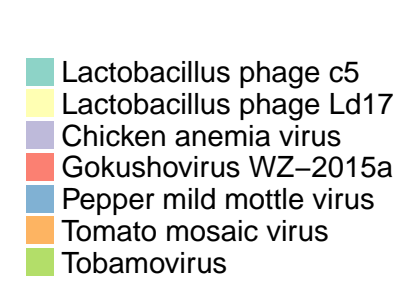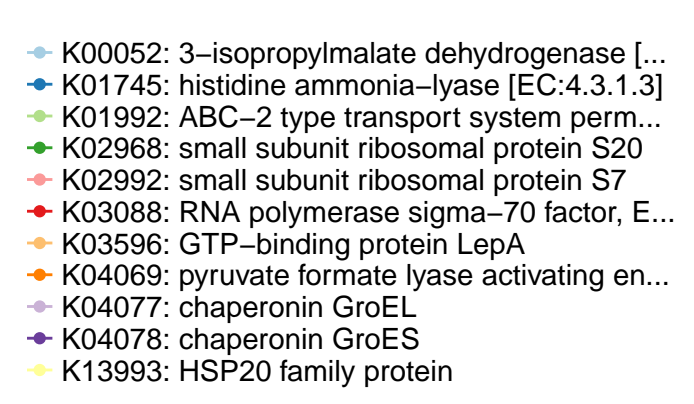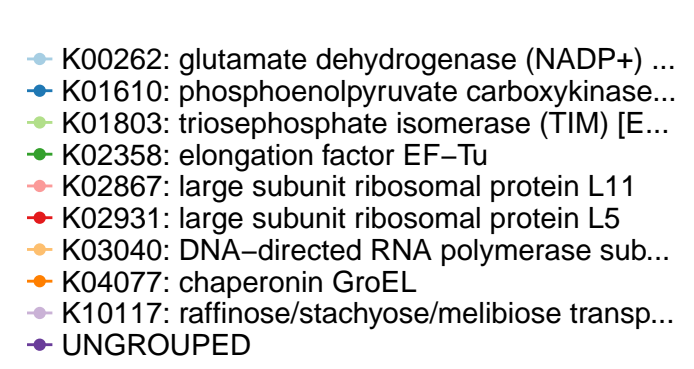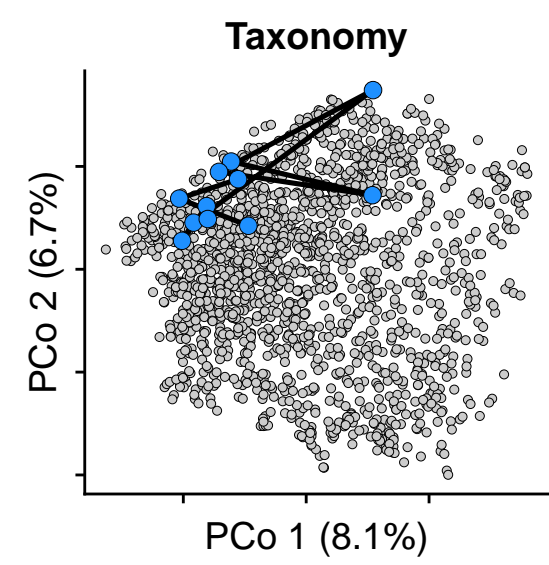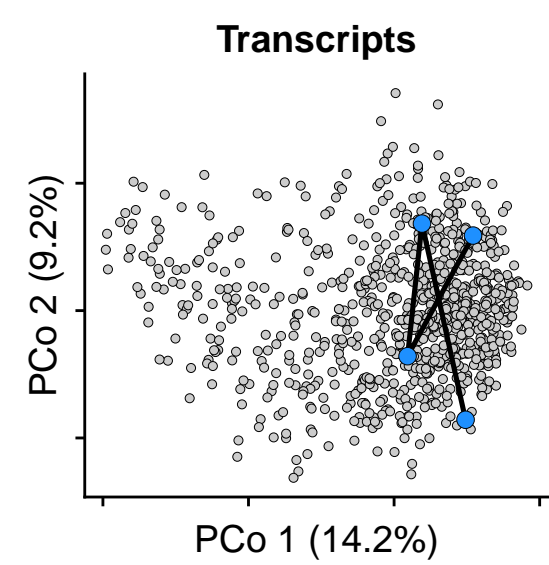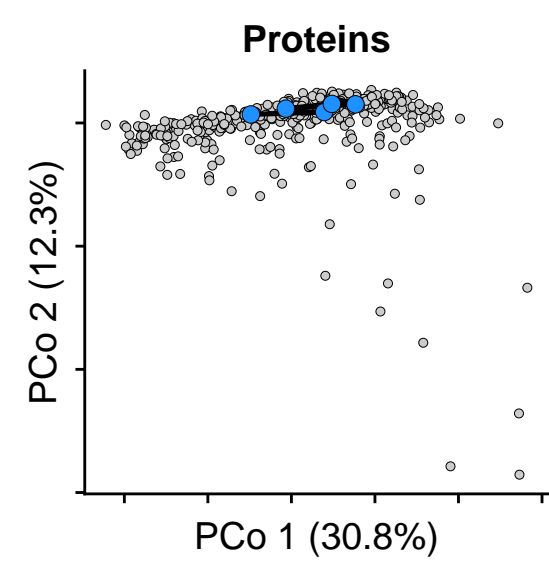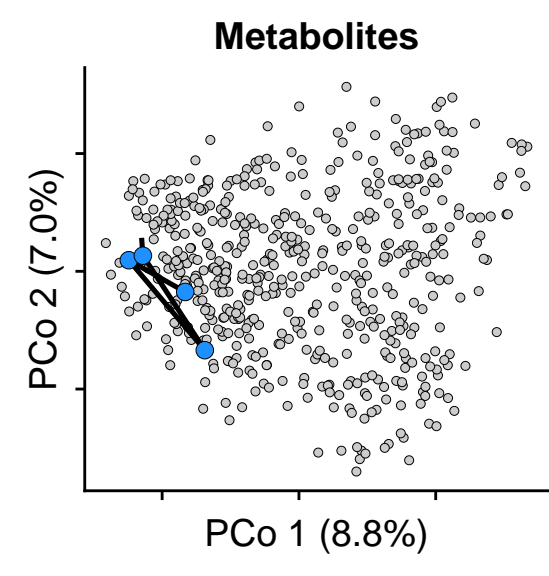

# E5013: 15 Female More than one race Emory | CD L1

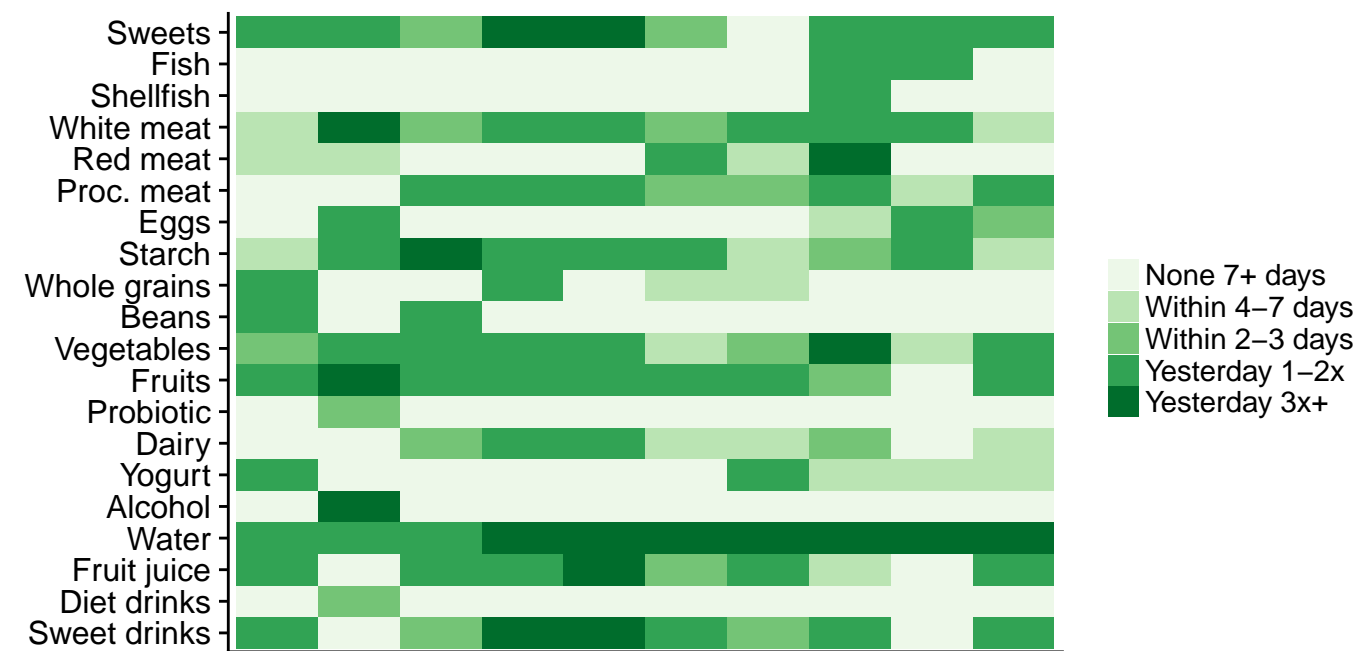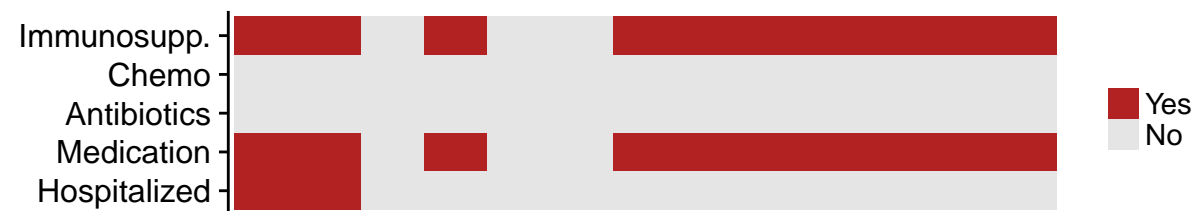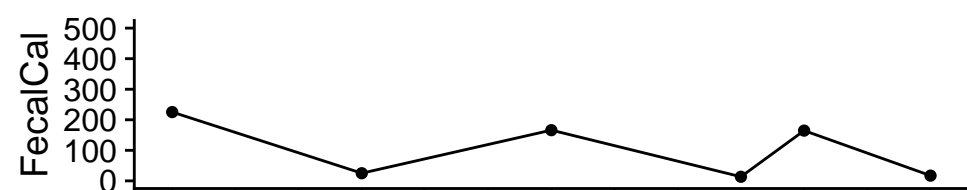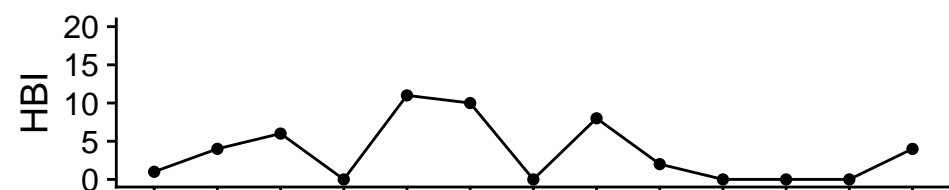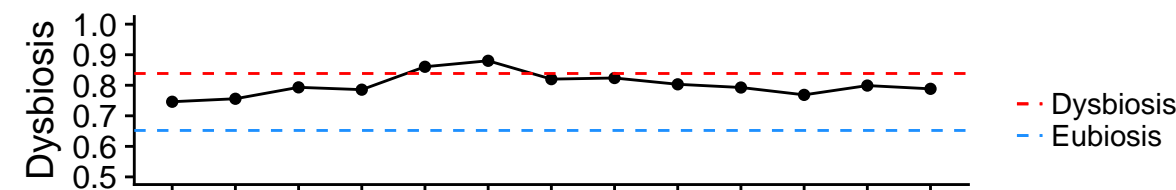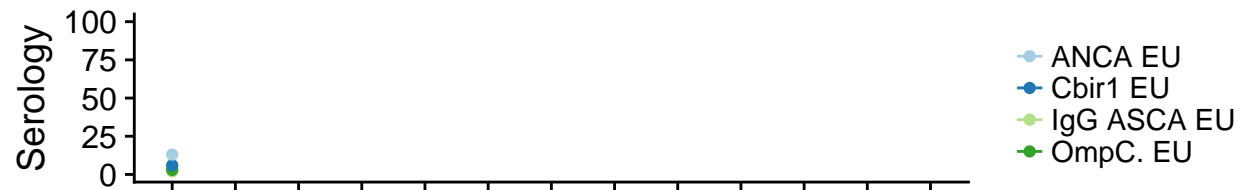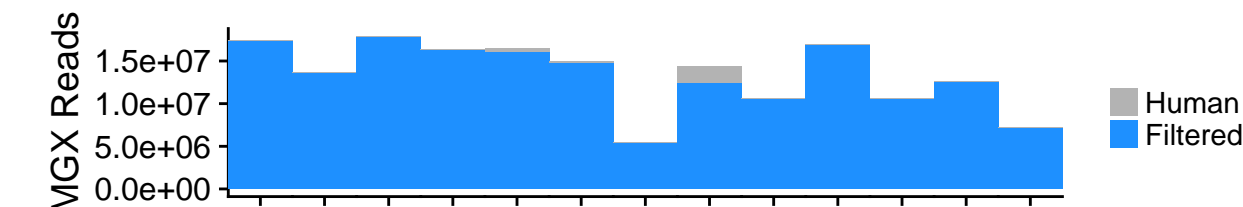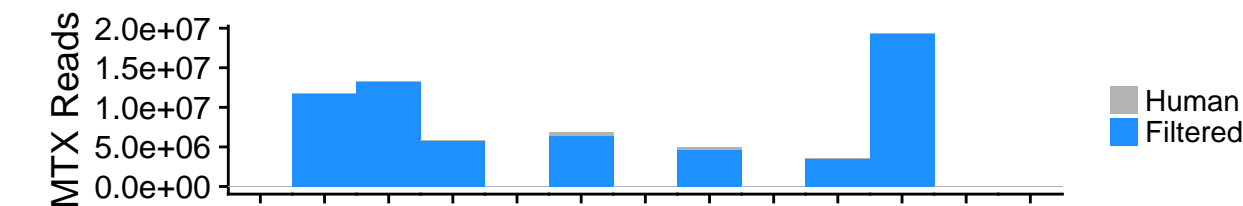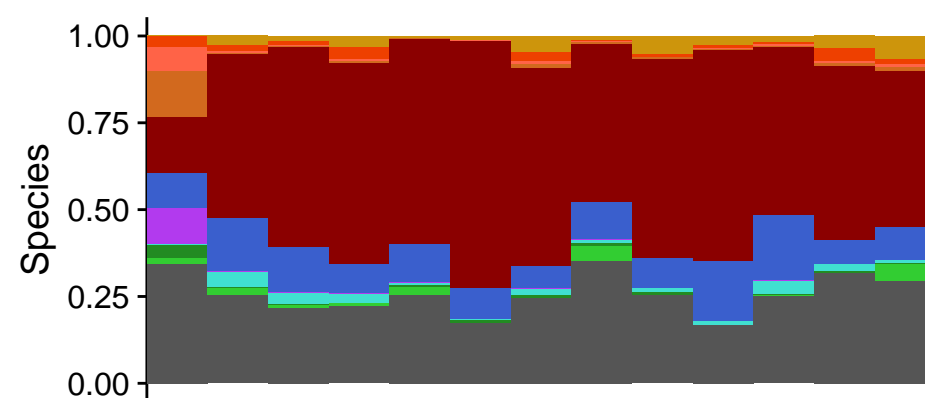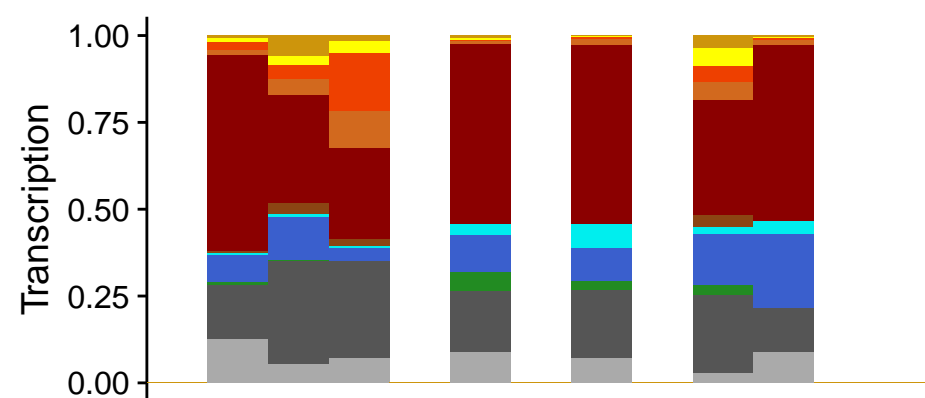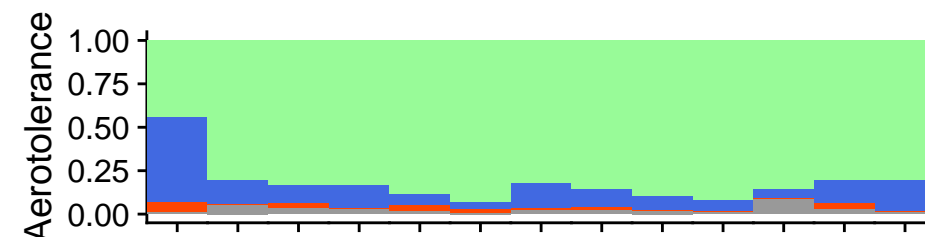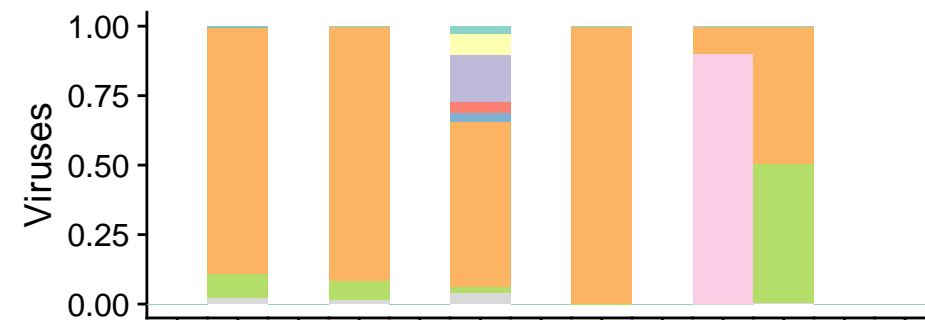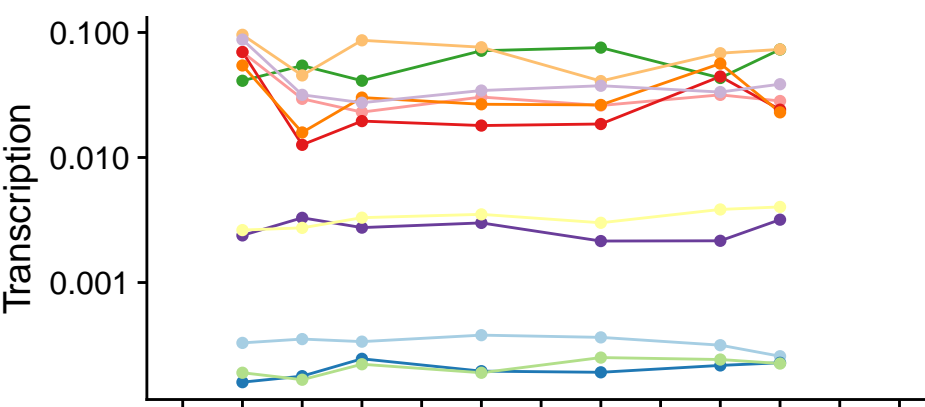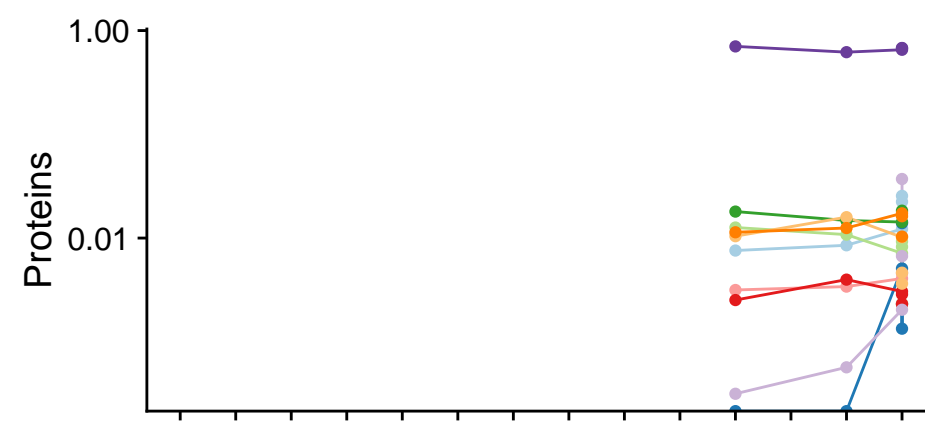

- Alistipes putredinis*
- Bacteroides caccae*
- Bacteroides ovatus*
- Bacteroides vulgatus*
- Prevotella copri*
- Faecalibacterium prausnitzii*
- Ruminococcus torques*
- Phascolarctobacterium succinatutens*
- Haemophilus parainfluenzae*
- Sutterella wadsworthensis*
- other

- Alistipes putredinis*
- Alistipes shahii*
- Bacteroides caccae*
- Bacteroides vulgatus*
- Prevotella copri*
- Odoribacter splanchnicus*
- Eubacterium rectale*
- Faecalibacterium prausnitzii*
- Haemophilus parainfluenzae*
- other
- unclassified

- obligate\_anaerobe
- aerotolerant
- facultative\_anaerobe
- unknown

- Pseudomonas phage UNO-SLW1*
- Pseudomonas phage PPpW-4*
- Sk1virus*
- unclassified Siphoviridae
- Gokushovirus WZ-2015a*
- Pepper mild mottle virus*
- Tomato mottle mosaic virus*
- other

- K00939: adenylate kinase [EC:2.7.4.3]
- K01885: glutamyl-tRNA synthetase [EC:6.1.1.10]
- K01886: glutamyl-tRNA synthetase [EC:6.1.1.10]
- K02358: elongation factor EF-Tu
- K02886: large subunit ribosomal protein L2
- K02892: large subunit ribosomal protein L23
- K02914: large subunit ribosomal protein L34
- K02950: small subunit ribosomal protein S12
- K02965: small subunit ribosomal protein S19
- K02982: small subunit ribosomal protein S3
- K02992: small subunit ribosomal protein S7

- K00262: glutamate dehydrogenase (NADP+) dependent
- K01805: xylose isomerase [EC:5.3.1.5]
- K02355: elongation factor EF-G
- K02358: elongation factor EF-Tu
- K02931: large subunit ribosomal protein L5
- K03046: DNA-directed RNA polymerase subunit beta
- K03737: pyruvate-ferredoxin/flavodoxin oxidoreductase
- K04043: molecular chaperone DnaK
- K10117: raffinose/stachyose/melibiose transport
- UNGROUPED

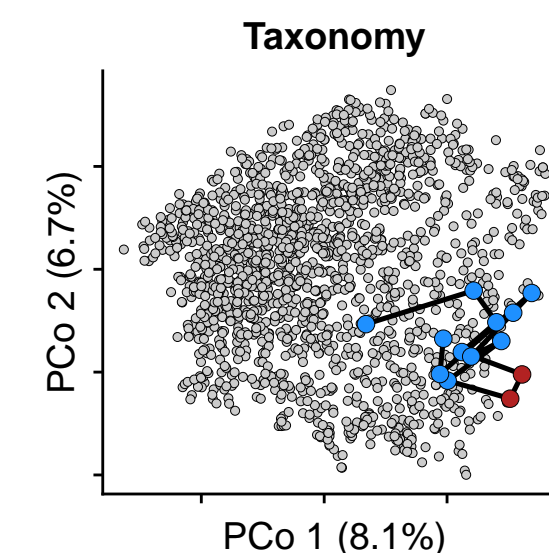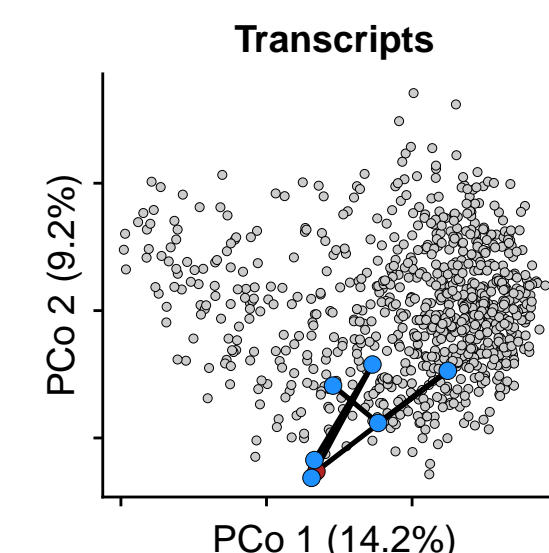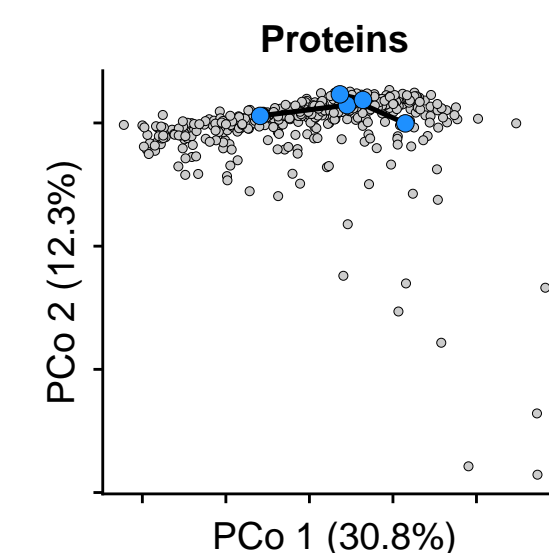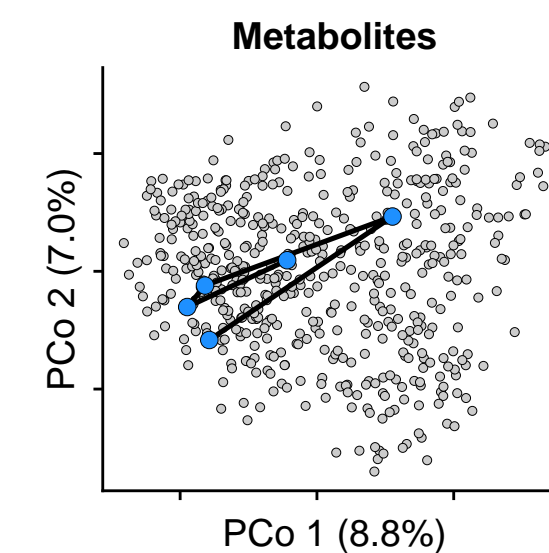

# H4001: 14 Male White Cincinnati | CD L3+L4

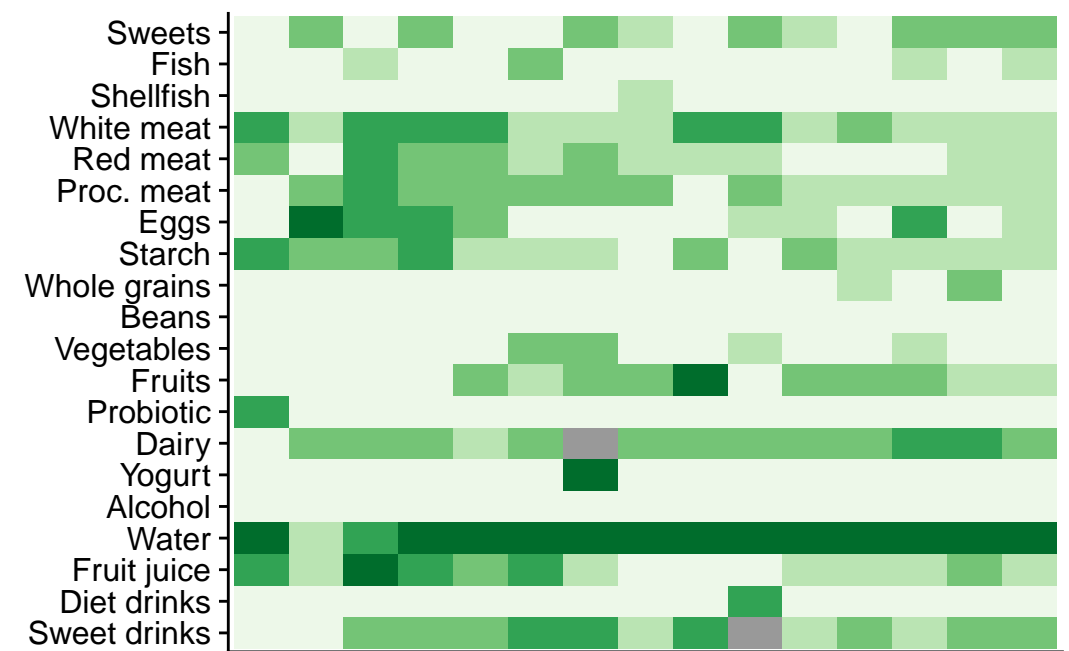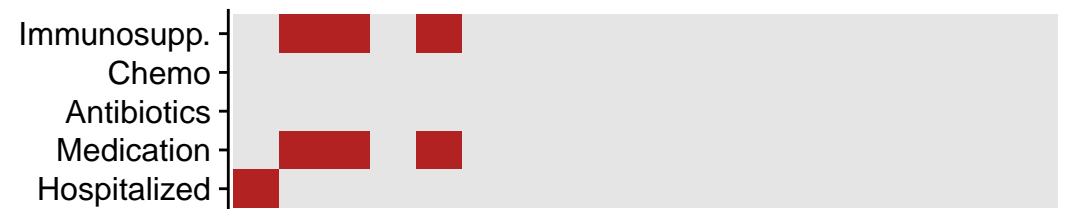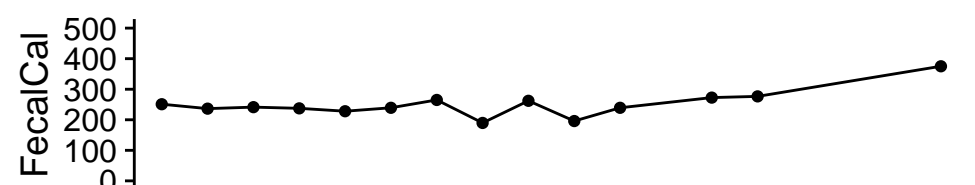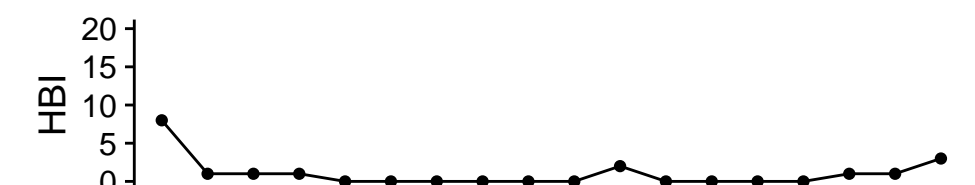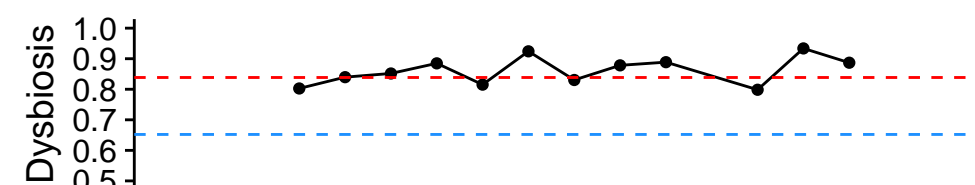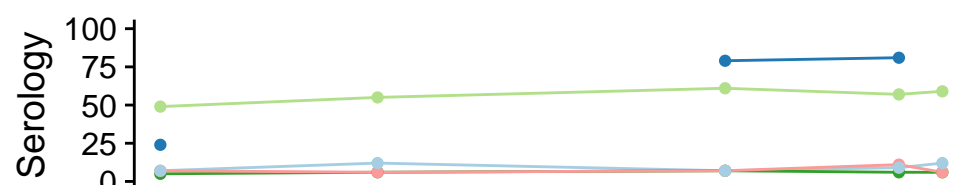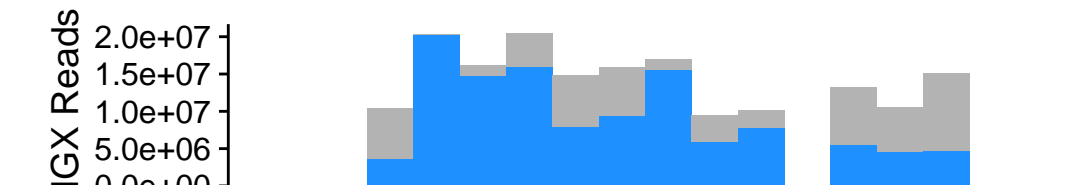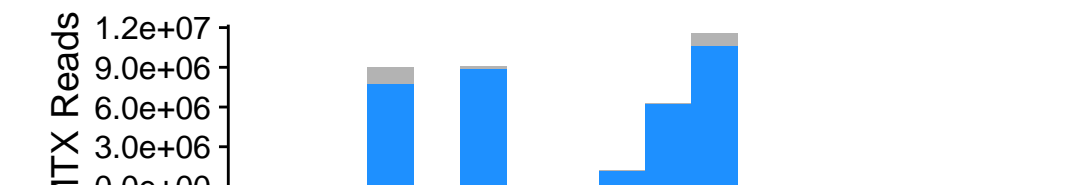

Blank  
None 7+ days  
Within 4-7 days  
Within 2-3 days  
Yesterday 1-2x  
Yesterday 3x+

Yes  
No

Dysbiosis  
Eubiosis

ANCA EU  
Cbir1 EU  
IgA ASCA EU  
IgG ASCA EU  
OmpC. EU

Human  
Filtered

Human  
Filtered

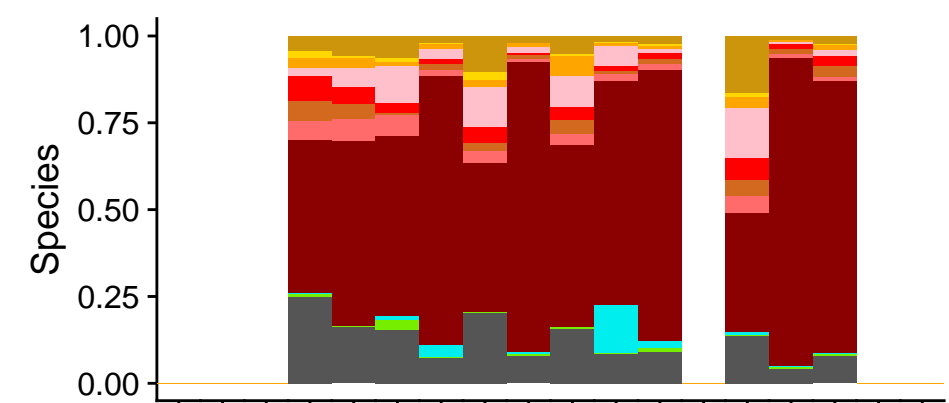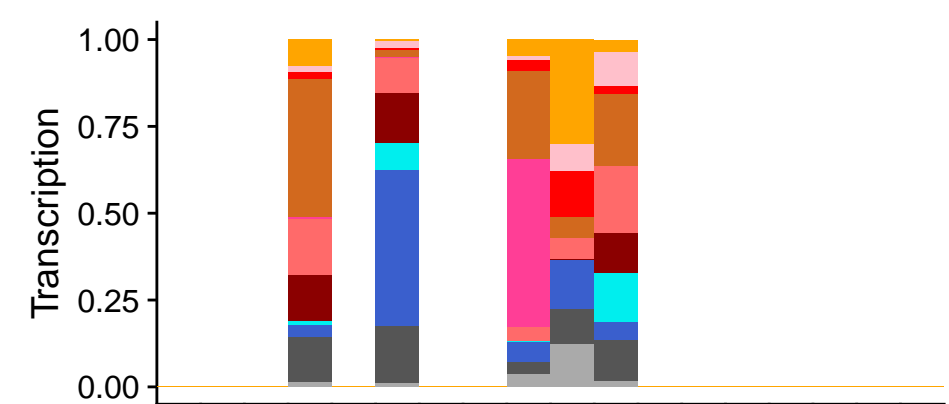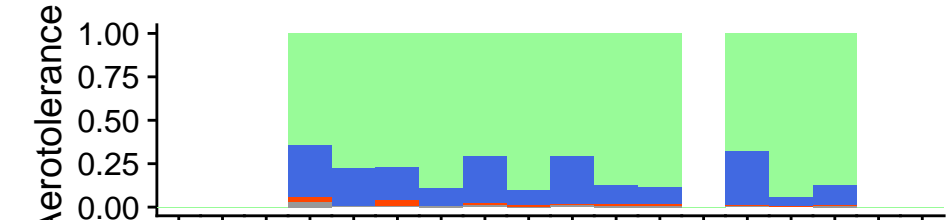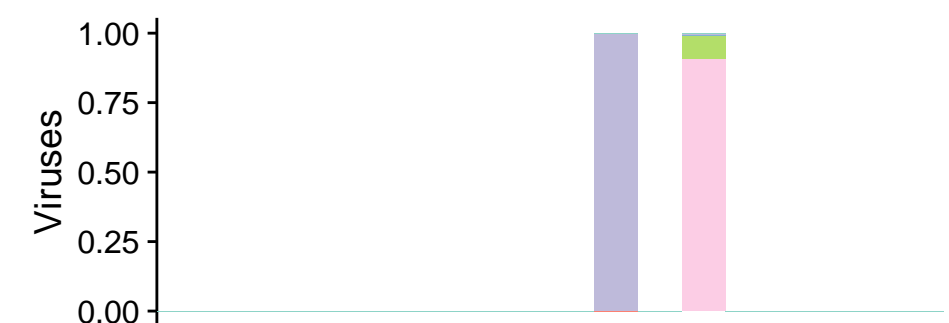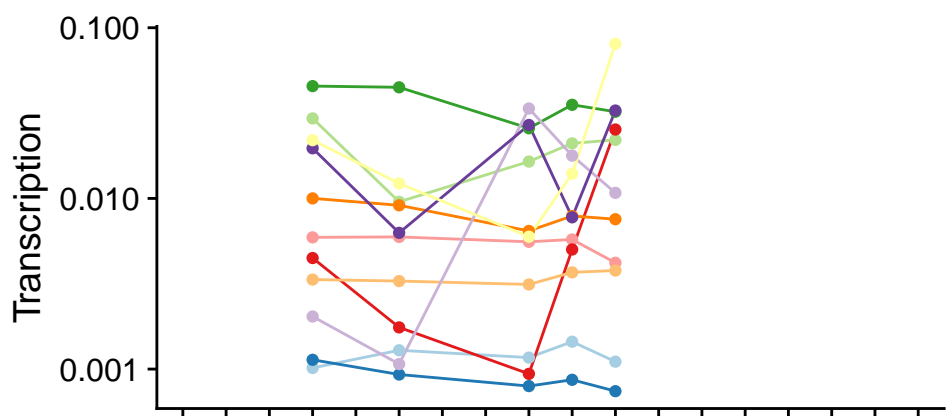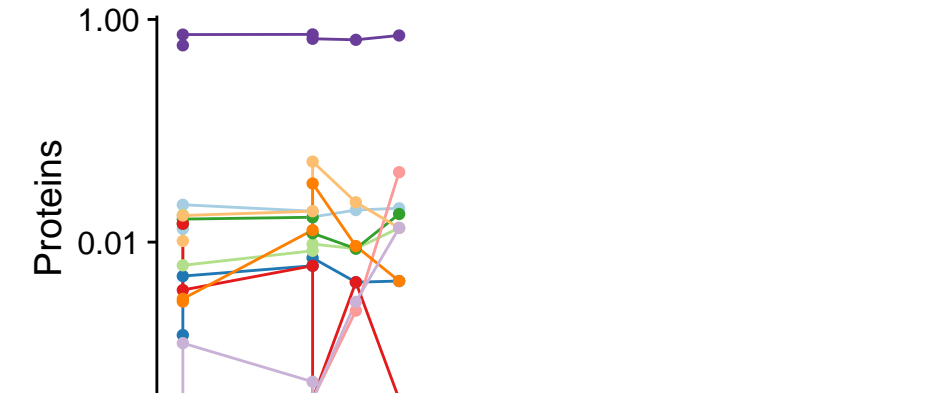

*Alistipes putredinis*  
*Alistipes onderdonkii*  
*Bacteroides dorei*  
*Bacteroides fragilis*  
*Bacteroides uniformis*  
*Bacteroides vulgatus*  
*Parabacteroides distasonis*  
*Prevotella copri*  
*Eubacterium rectale*  
*Escherichia coli*  
other

*Bacteroides dorei*  
*Bacteroides fragilis*  
*Bacteroides uniformis*  
*Bacteroides vulgatus*  
*Bacteroides xylanisolvens*  
*Parabacteroides distasonis*  
*Prevotella copri*  
*Eubacterium rectale*  
*Faecalibacterium prausnitzii*  
other  
unclassified

obligate anaerobe  
aerotolerant  
facultative anaerobe  
unknown

T7virus  
Pseudomonas phage PPpW-4  
unclassified Siphoviridae  
Chicken anemia virus  
Porcine parvovirus 5  
Porcine parvovirus 7  
Bell pepper mottle virus  
Pepper mild mottle virus

K01572: oxaloacetate decarboxylase, beta su...  
K01881: prolyl-tRNA synthetase [EC:6.1.1.15]  
K02078: acyl carrier protein  
K02358: elongation factor EF-Tu  
K02884: large subunit ribosomal protein L19  
K02914: large subunit ribosomal protein L34  
K02916: large subunit ribosomal protein L35  
K02946: small subunit ribosomal protein S10  
K03088: RNA polymerase sigma-70 factor, E...  
K04078: chaperonin GroES  
K13993: HSP20 family protein

K00262: glutamate dehydrogenase (NADP+) ...  
K01006: pyruvate, orthophosphate dikinase [...]  
K01803: triosephosphate isomerase (TIM) [E...  
K01805: xylose isomerase [EC:5.3.1.5]  
K03332: fructan beta-fructosidase [EC:3.2.1....  
K04043: molecular chaperone DnaK  
K10117: raffinose/stachyose/melibiose transp...  
K10200: N-acetylglucosamine transport syst...  
K10546: putative multiple sugar transport sys...  
UNGROUPED

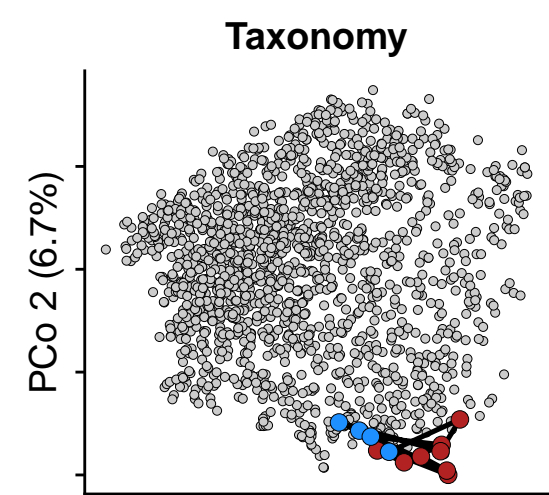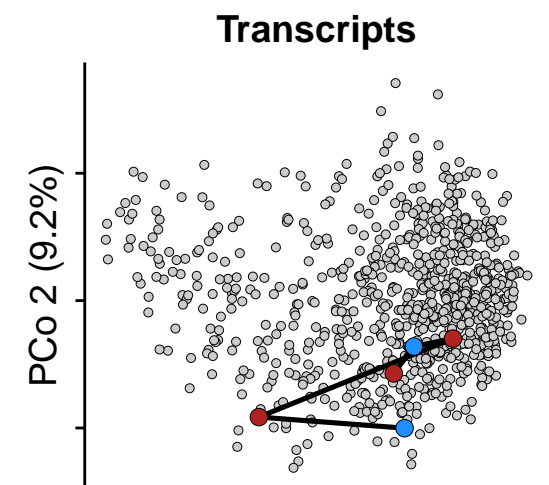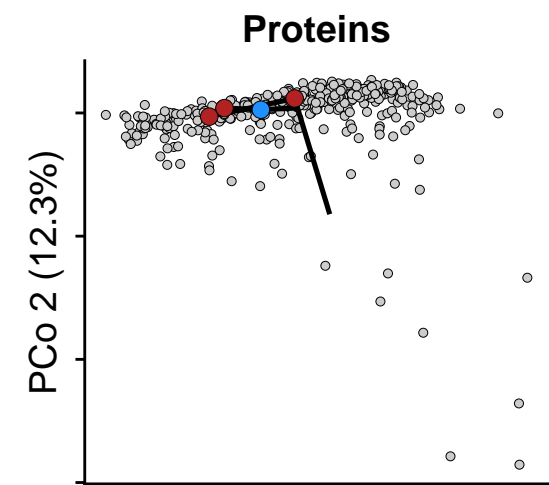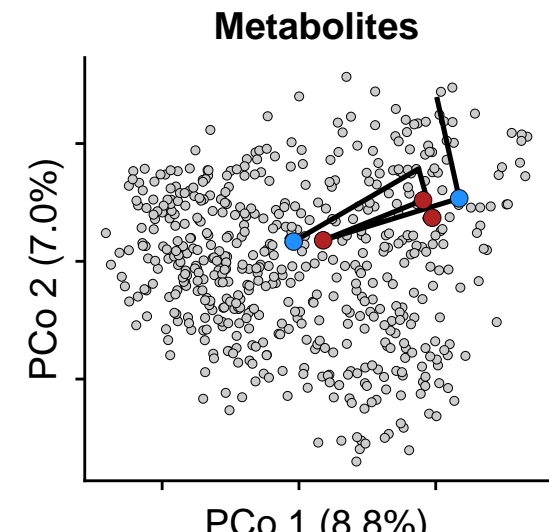

# H4004: 14 Male White Cincinnati | CD L3

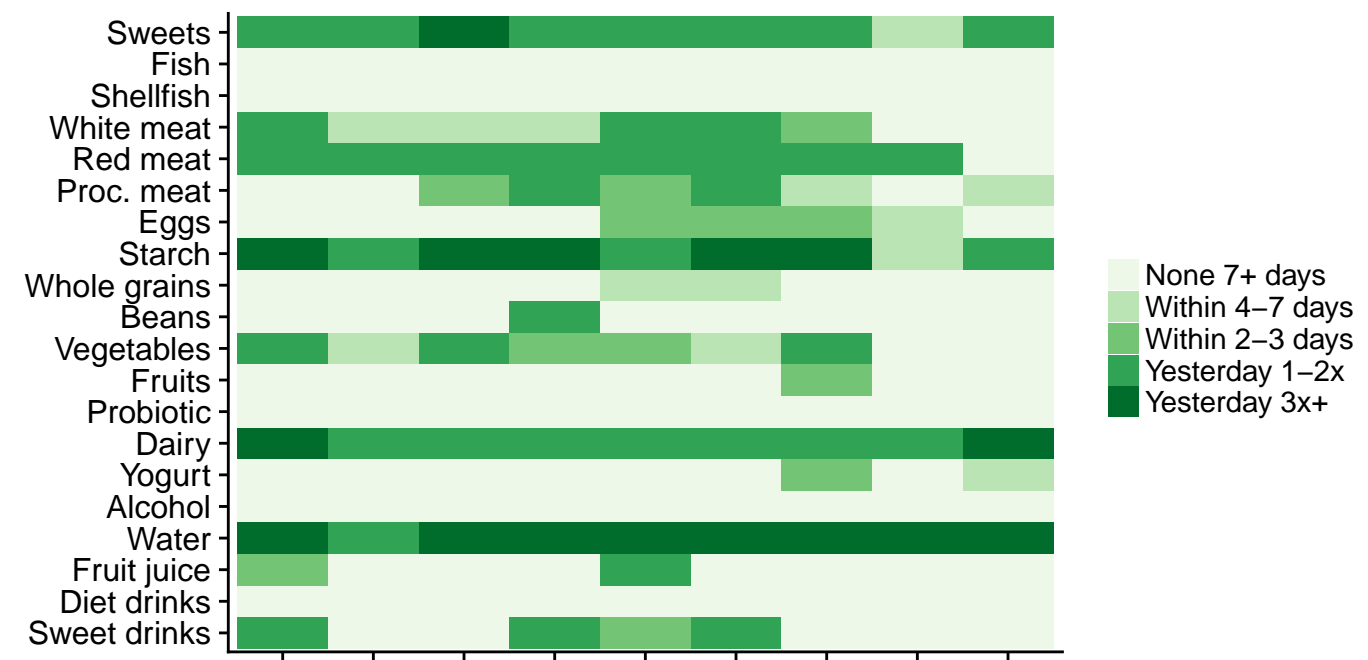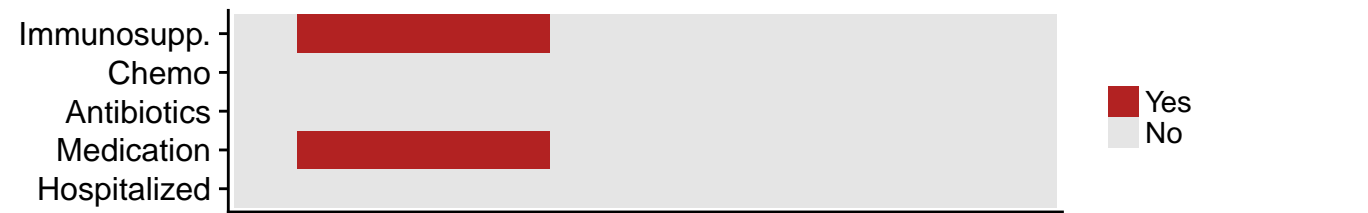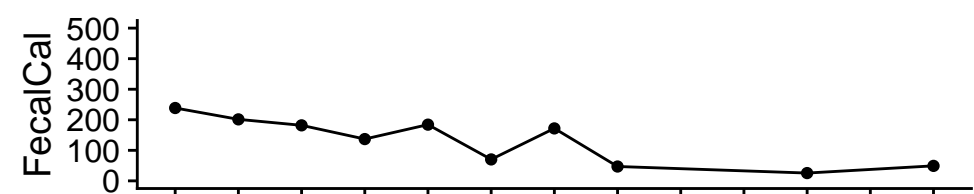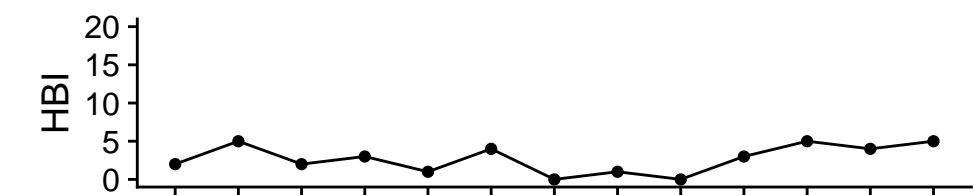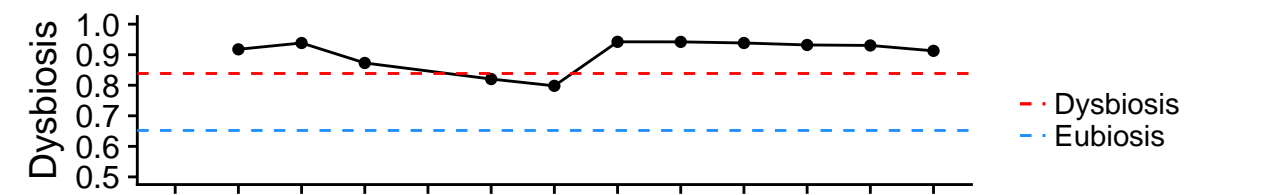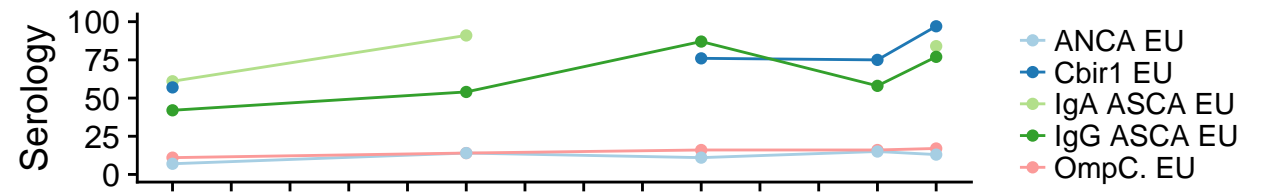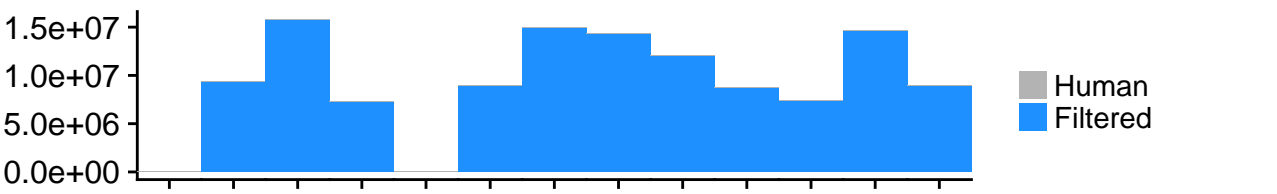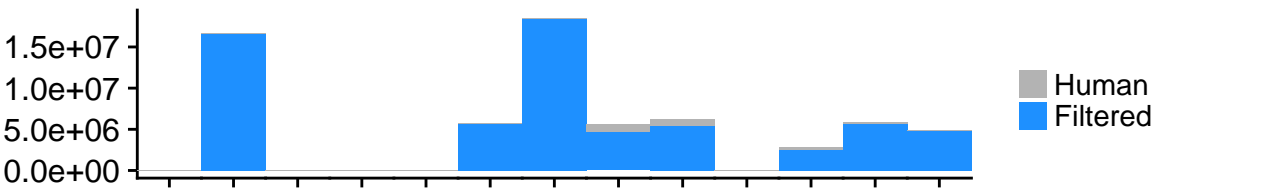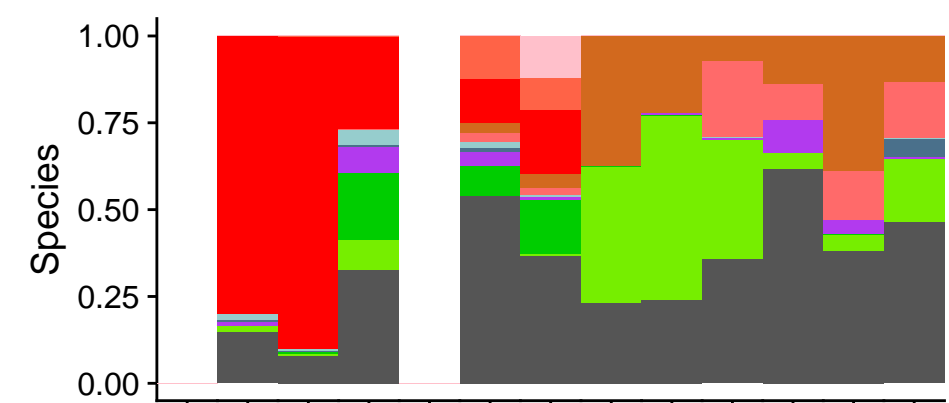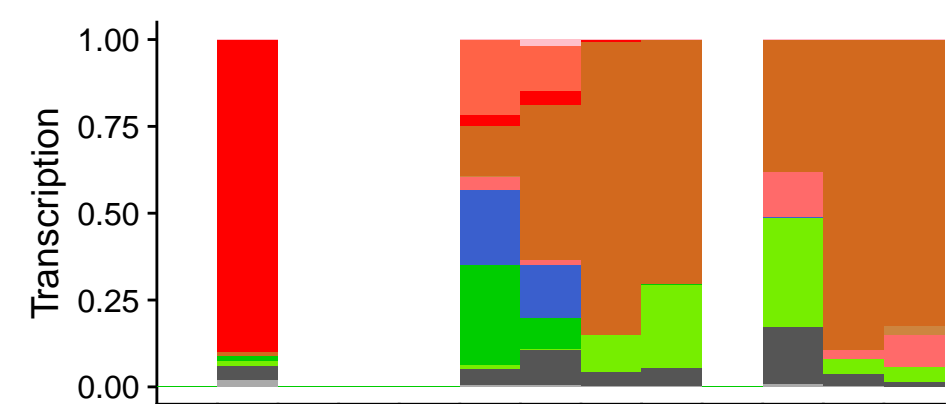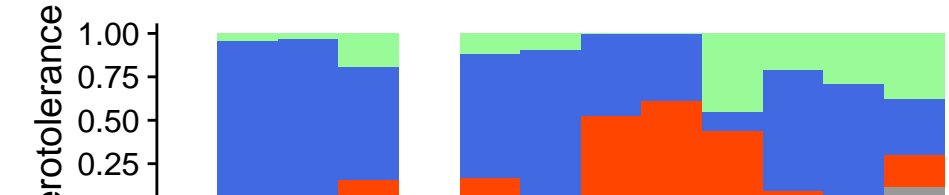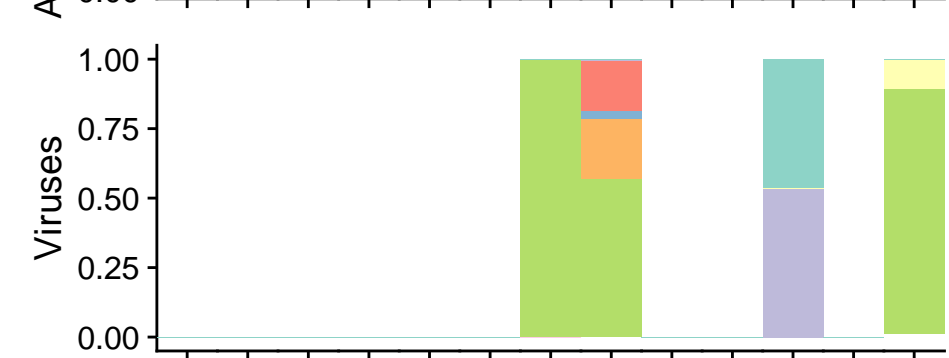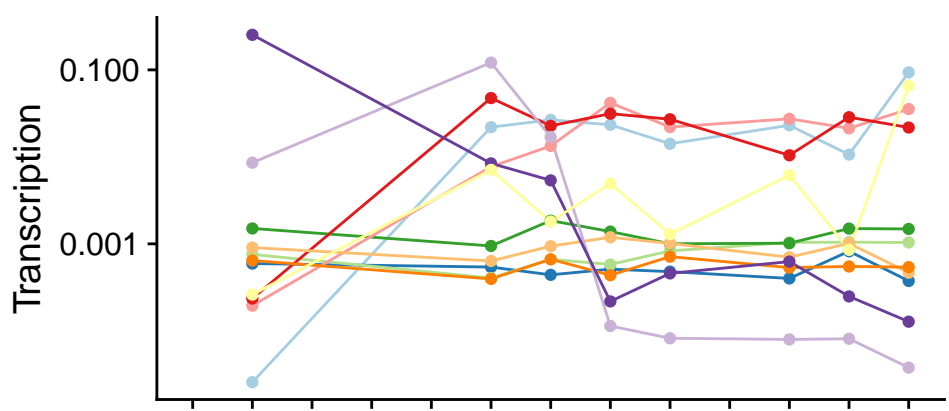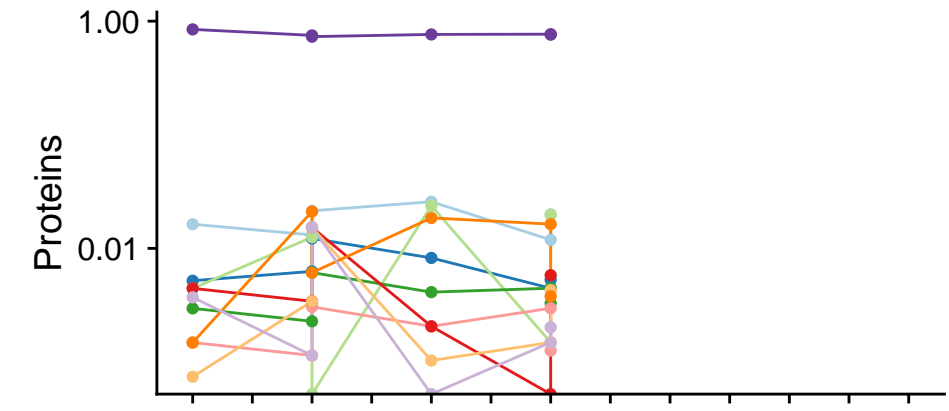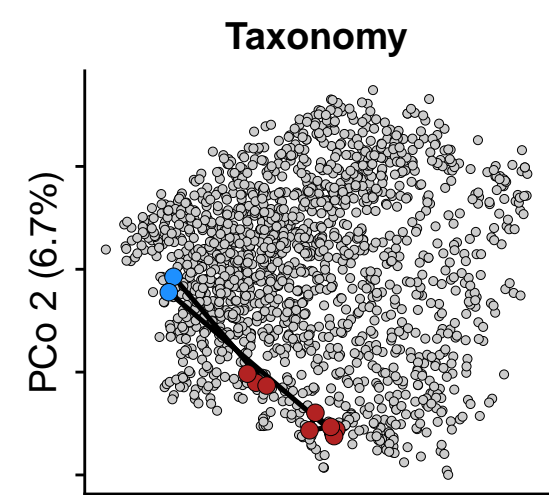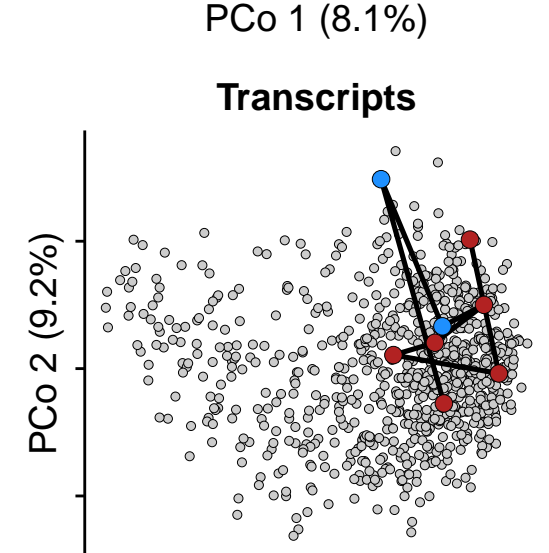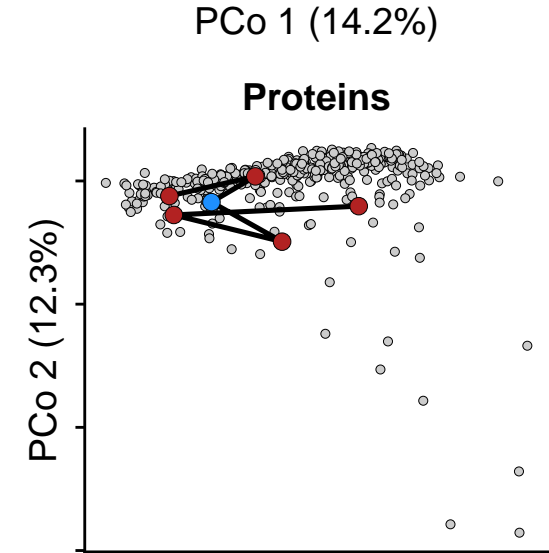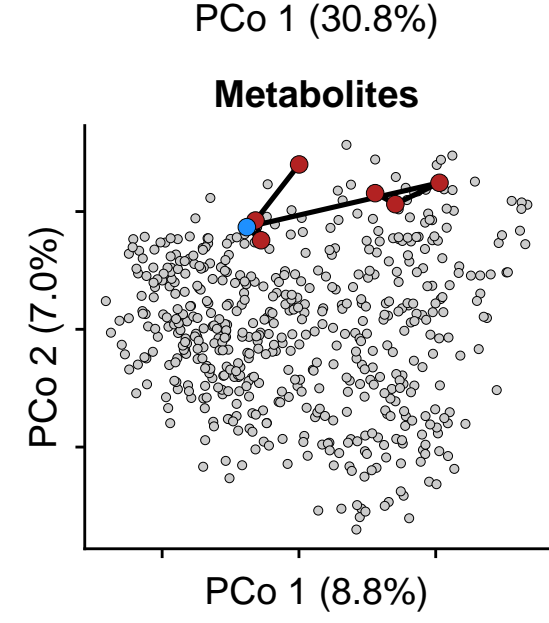

H4006: 8 Male White Cincinnati | CD L2+L4

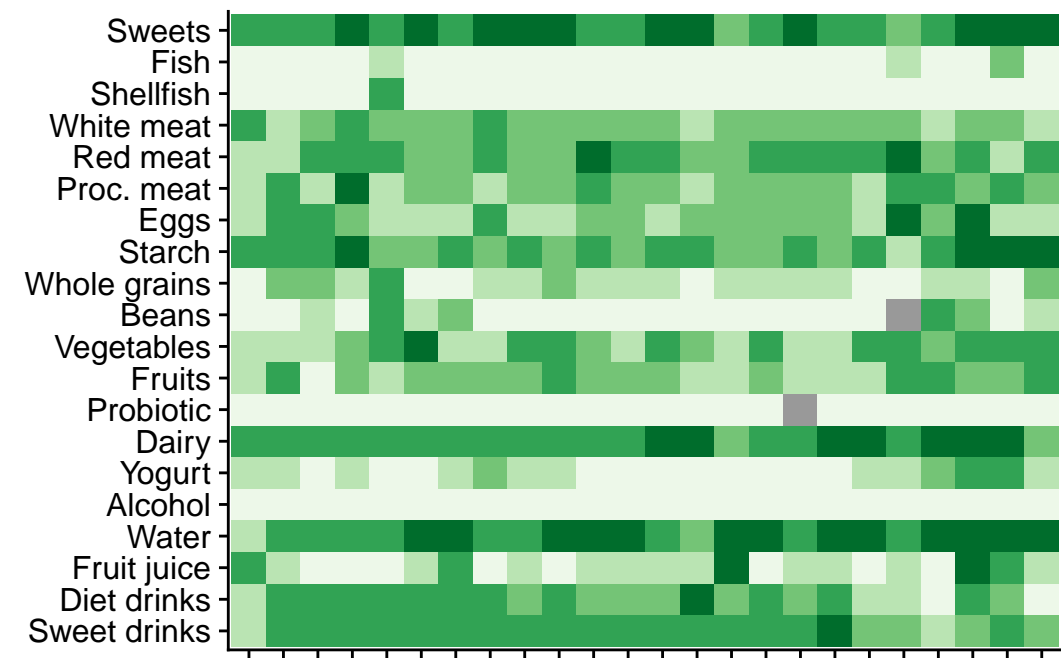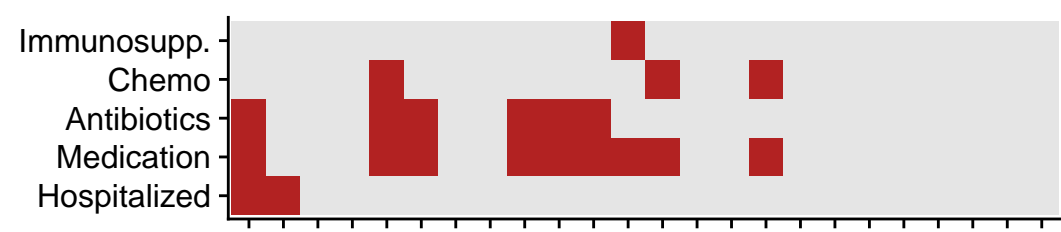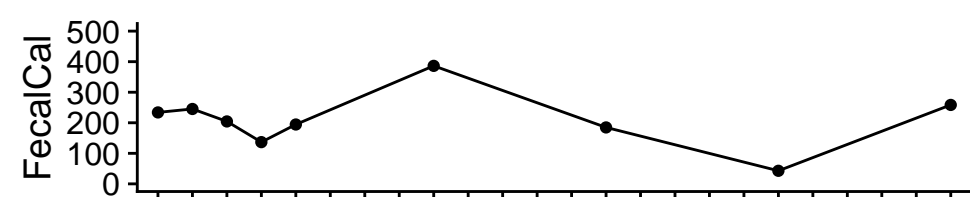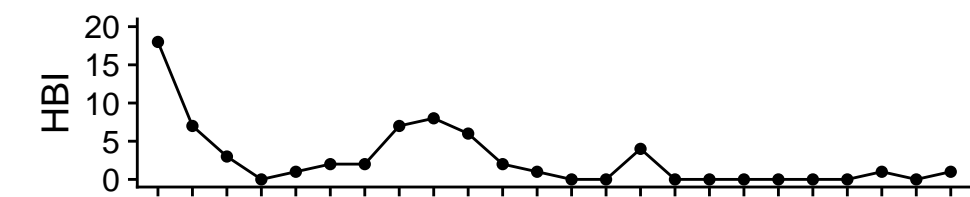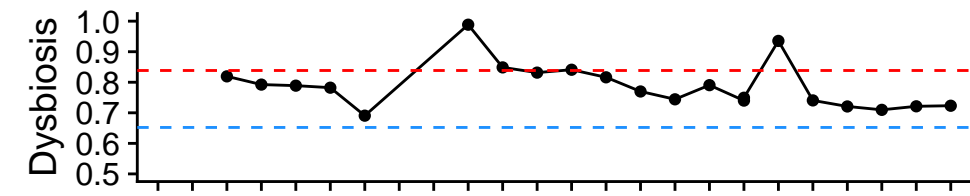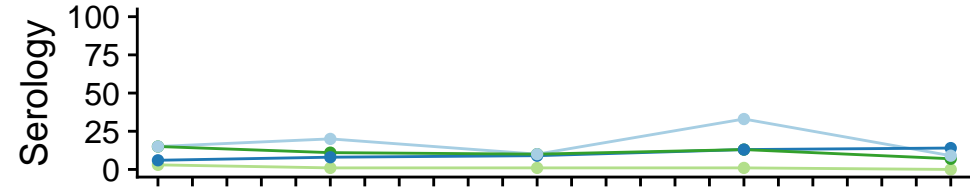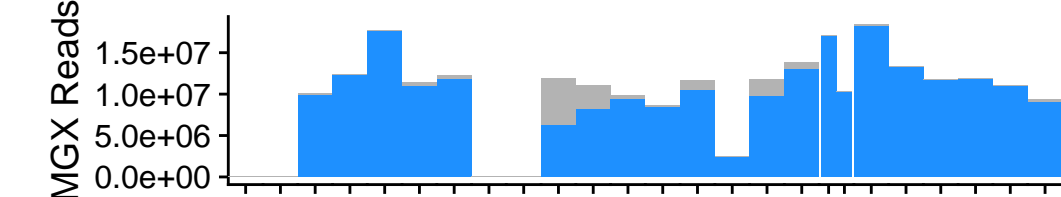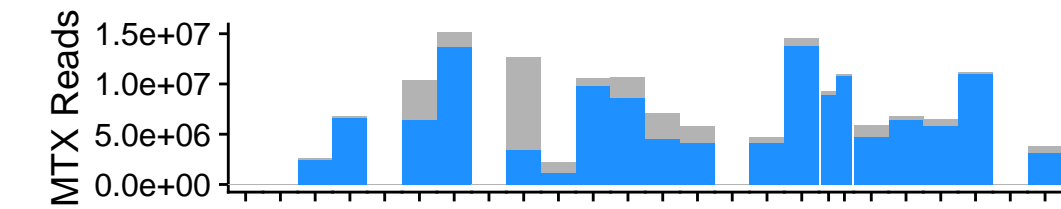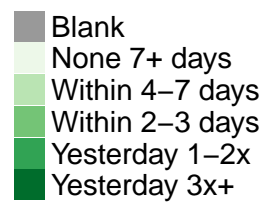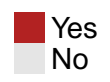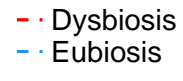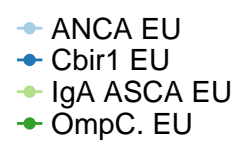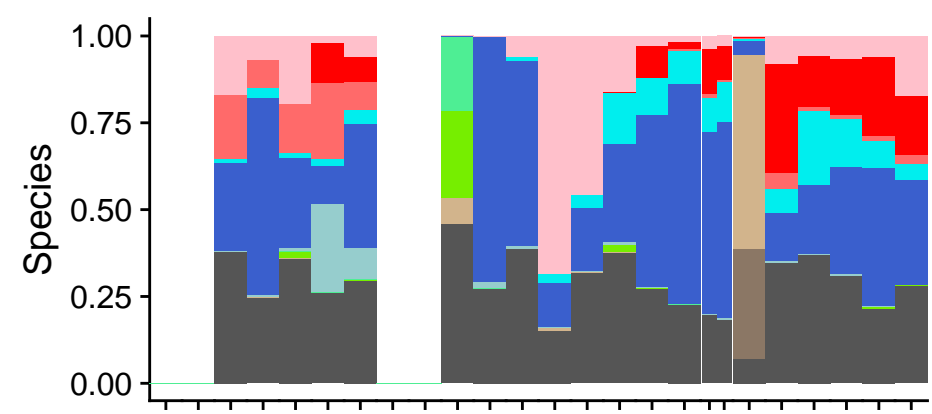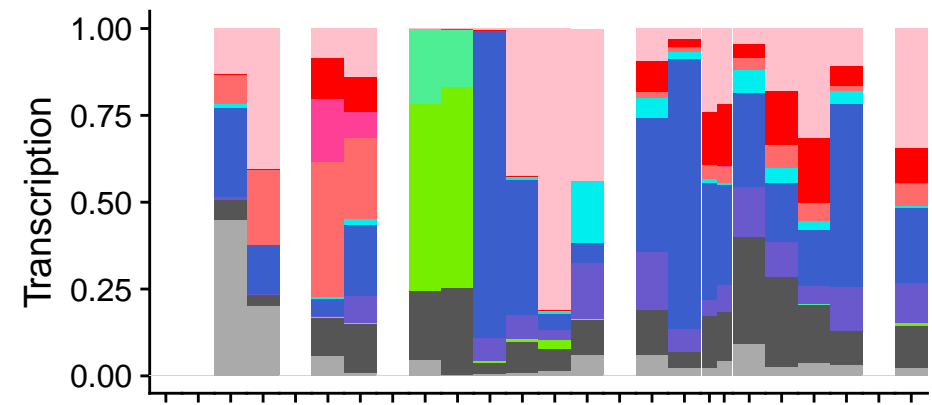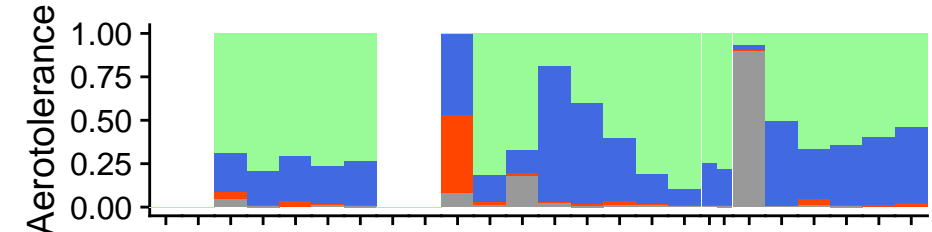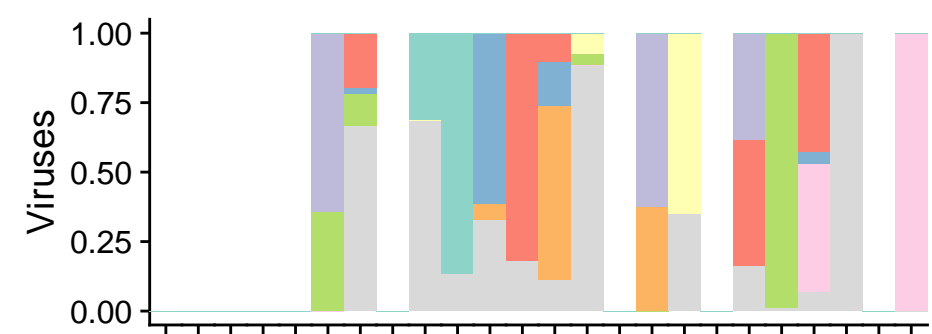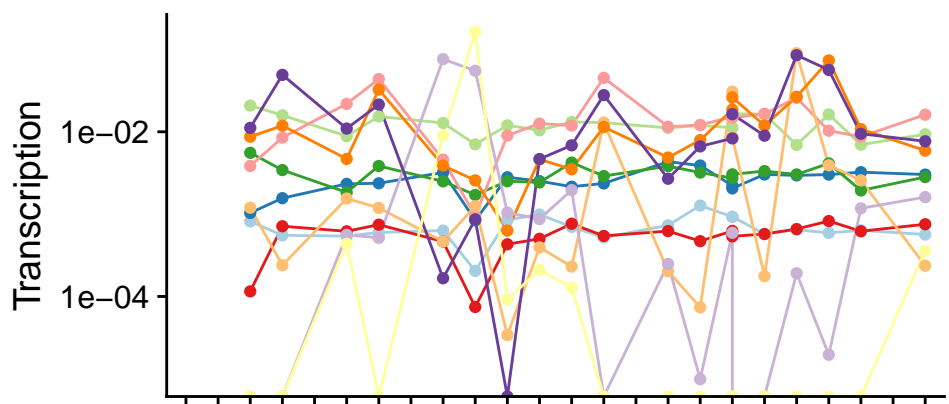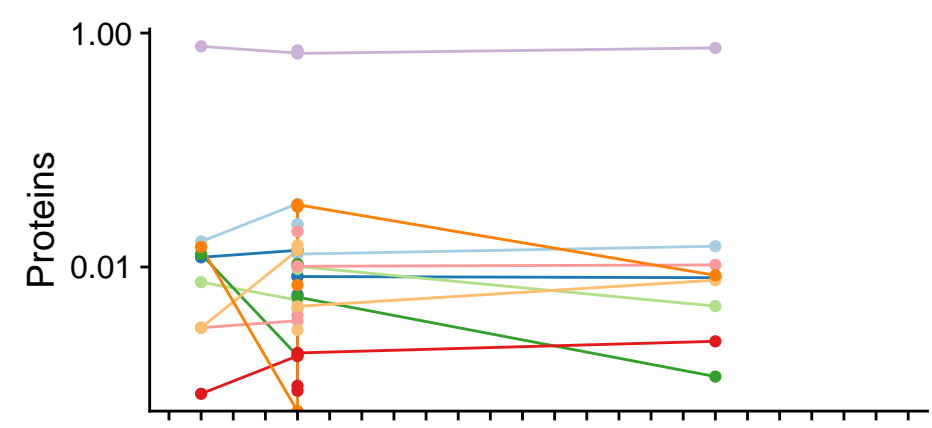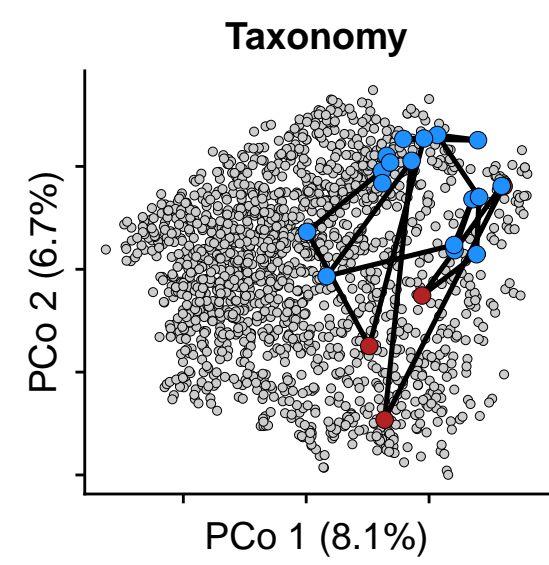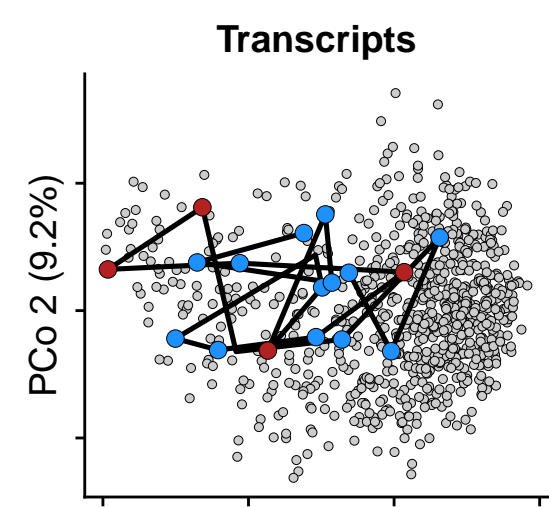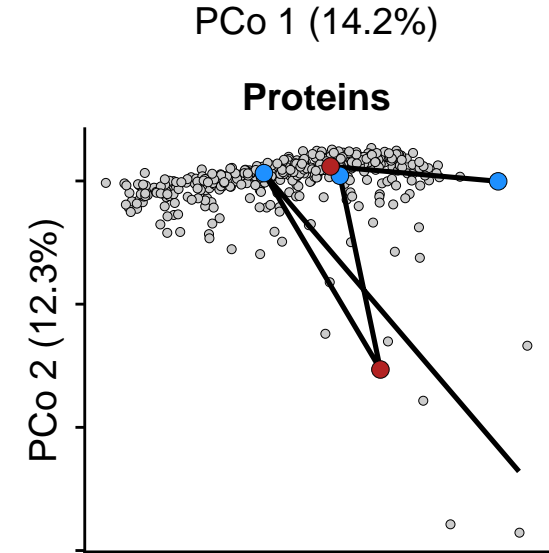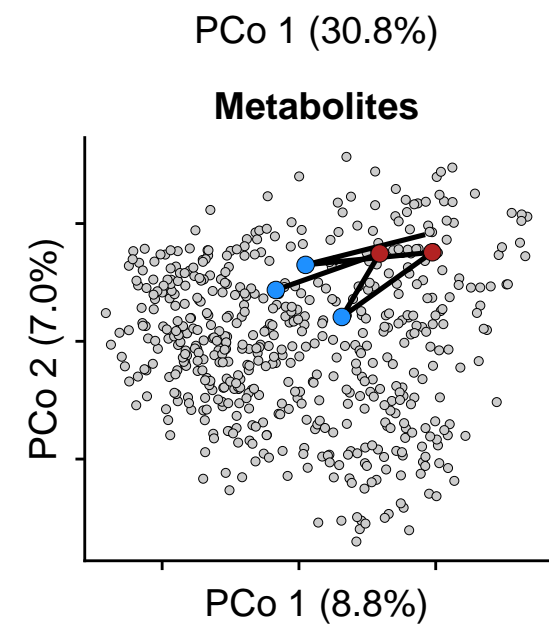

# H4007: 15 Female White Cincinnati | CD L3+L4

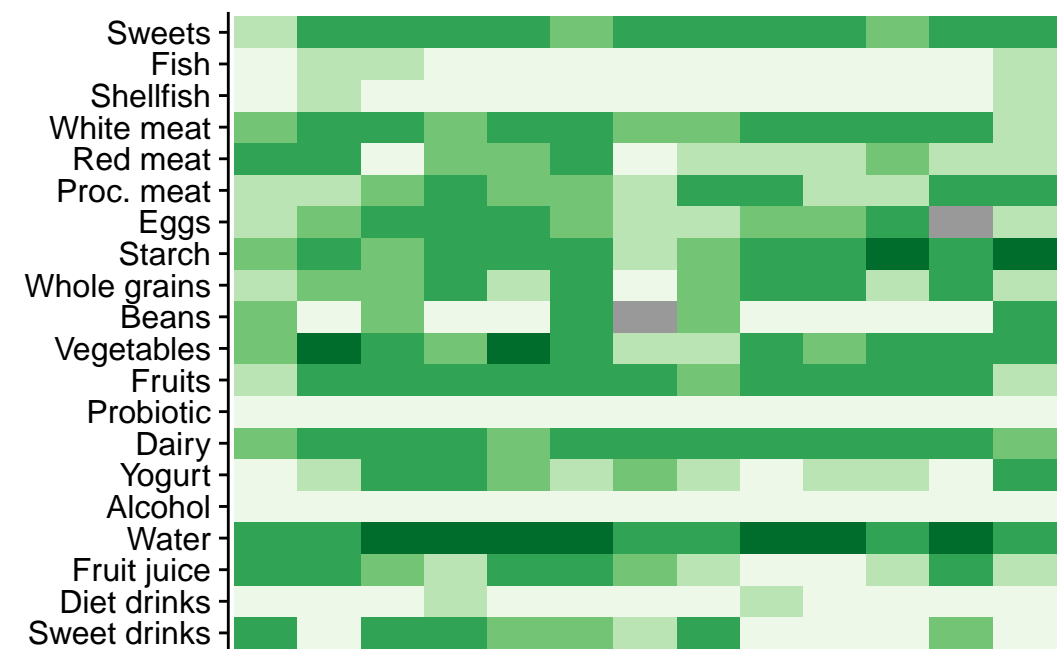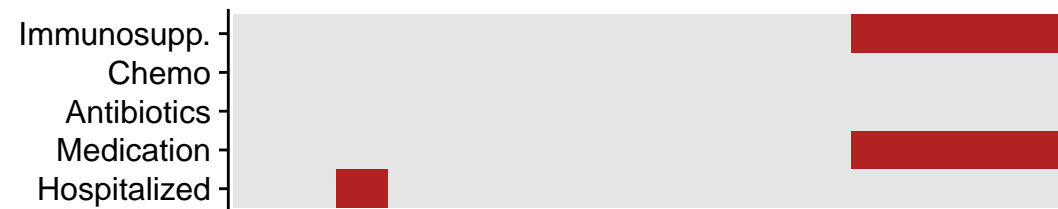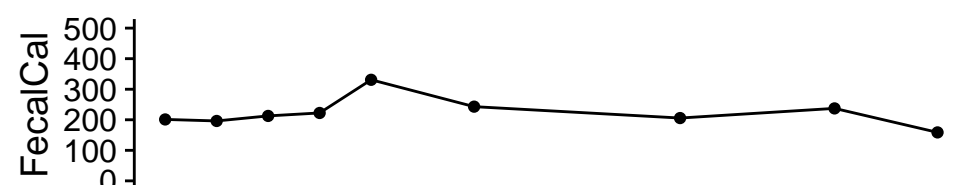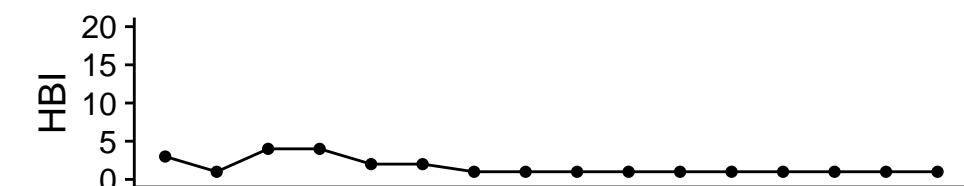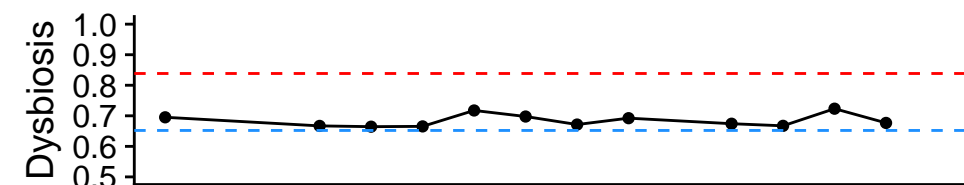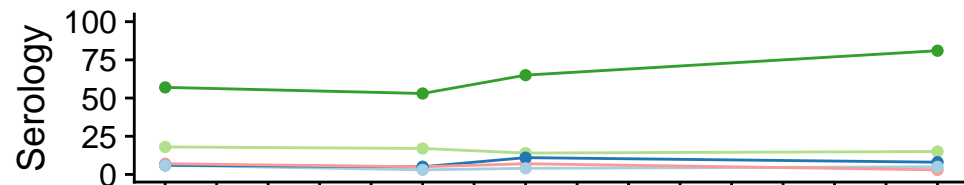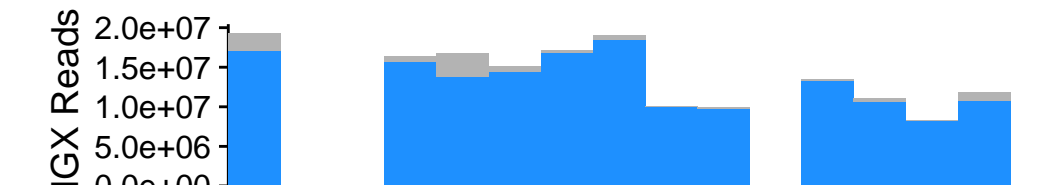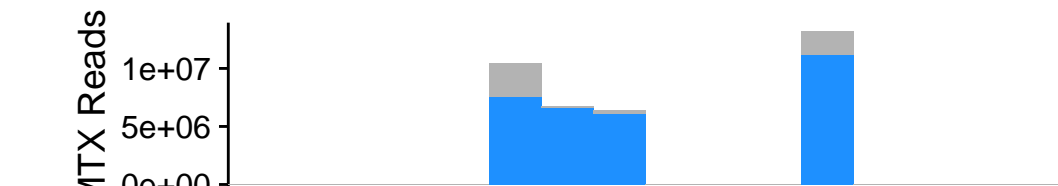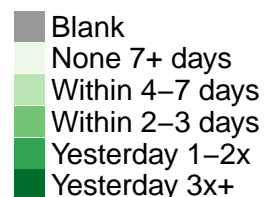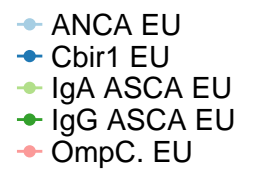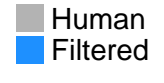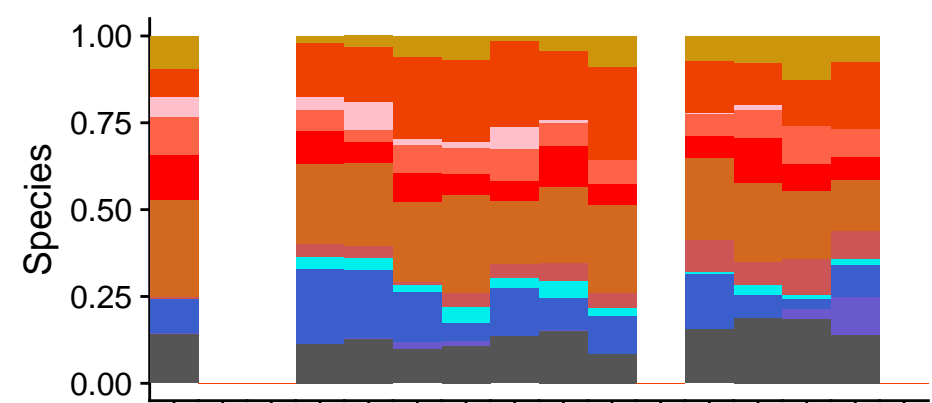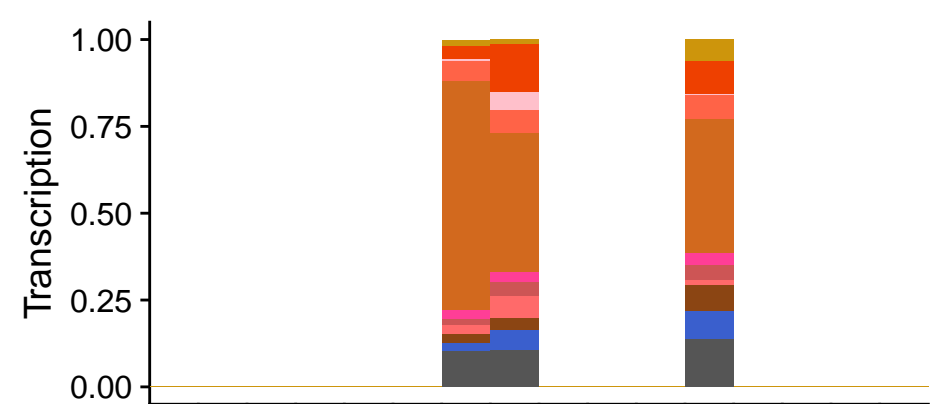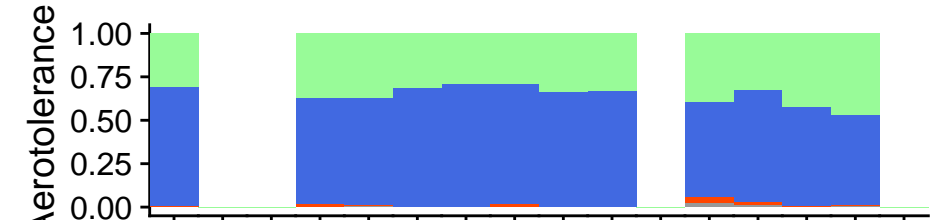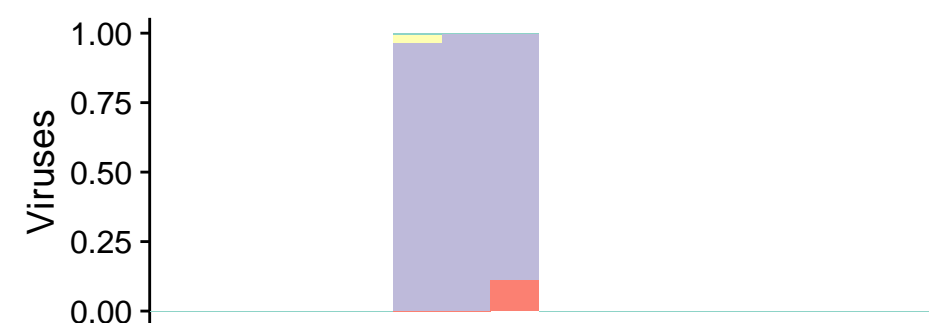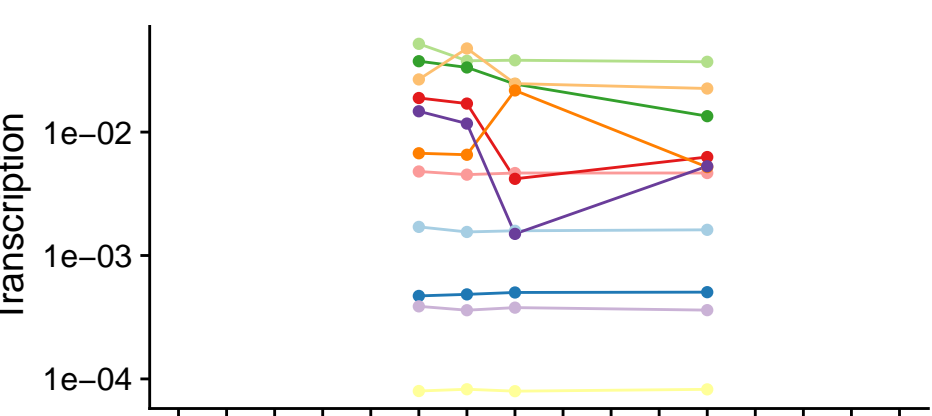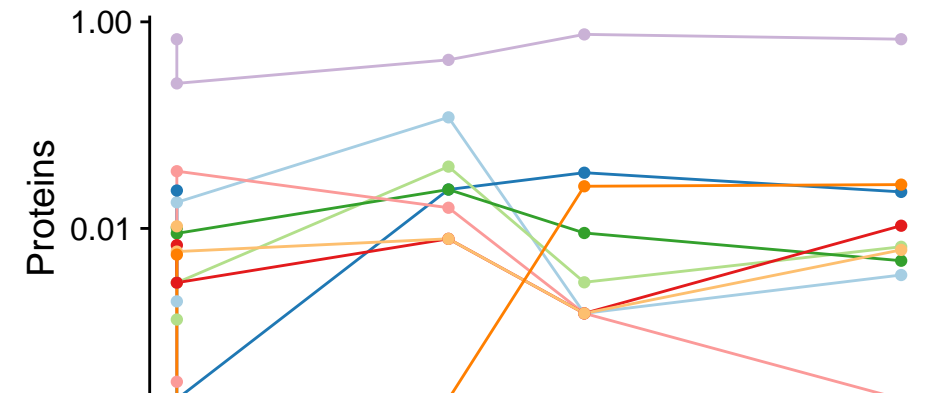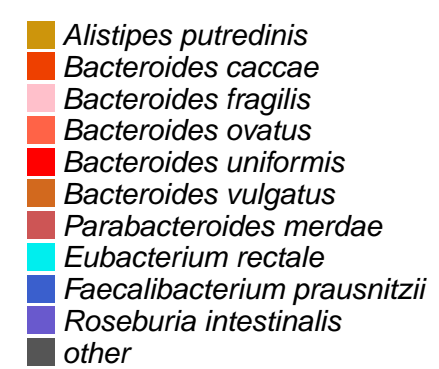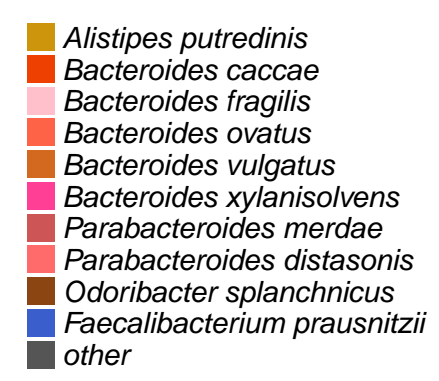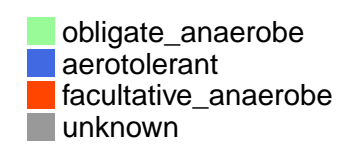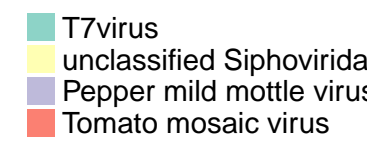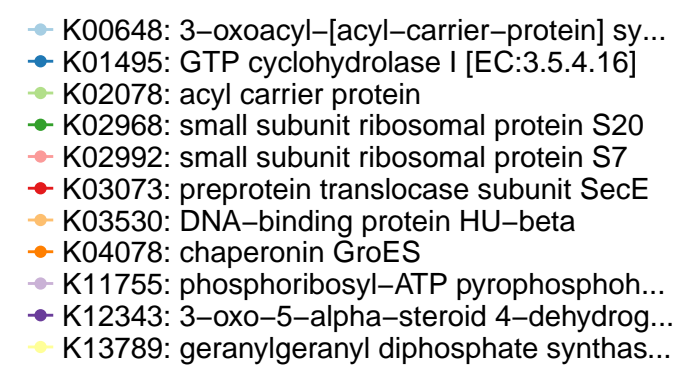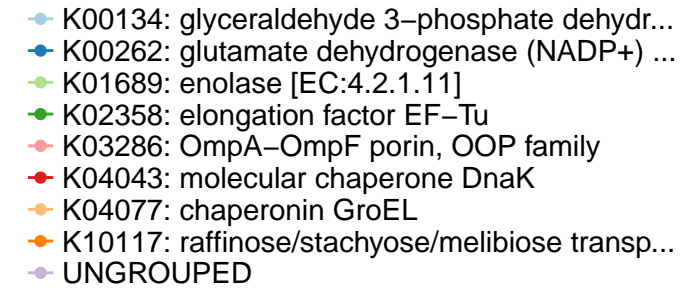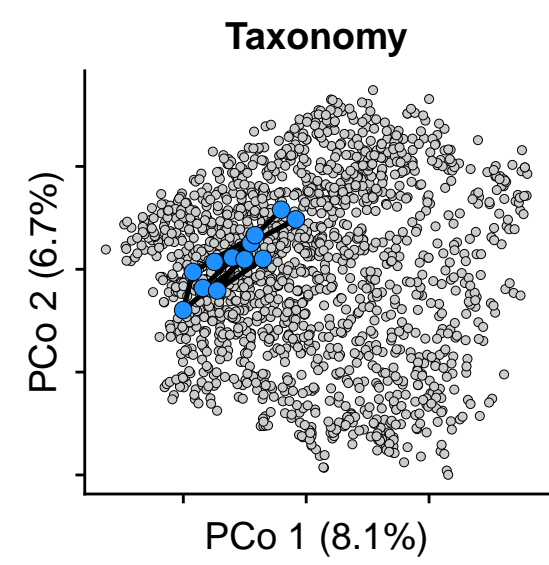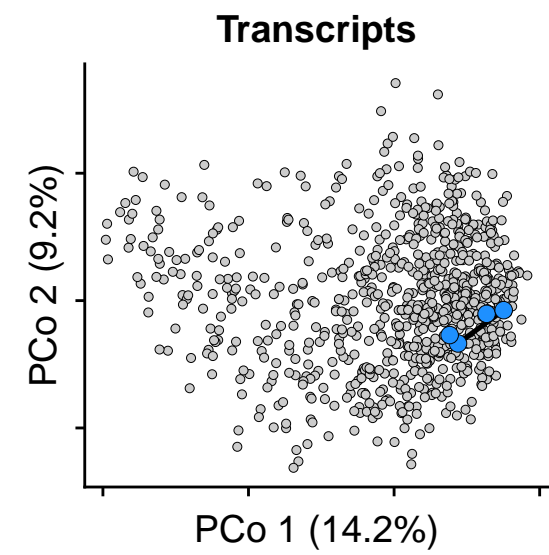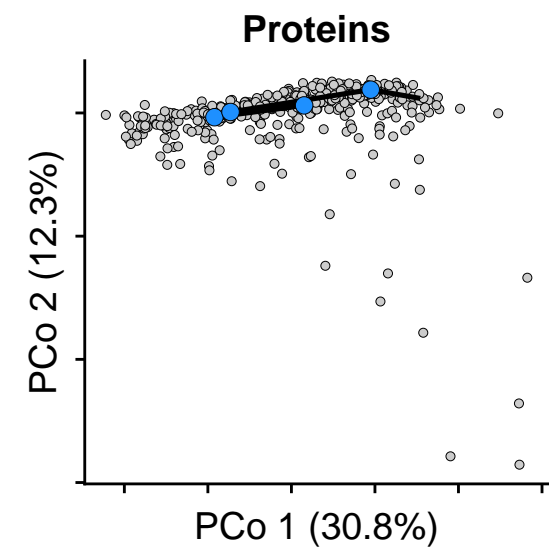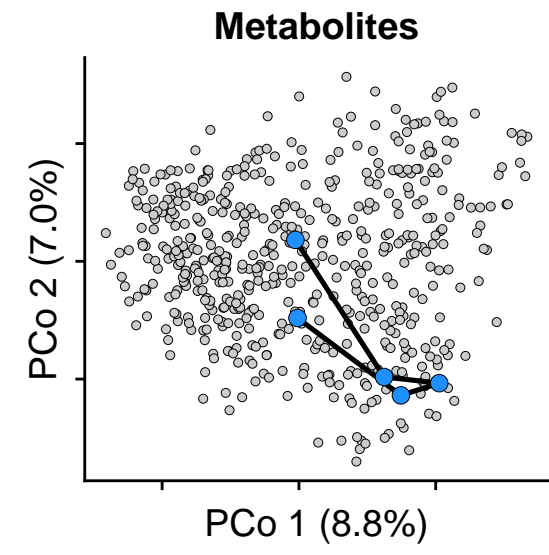



# H4008: 13 Female White Cincinnati | nonIBD

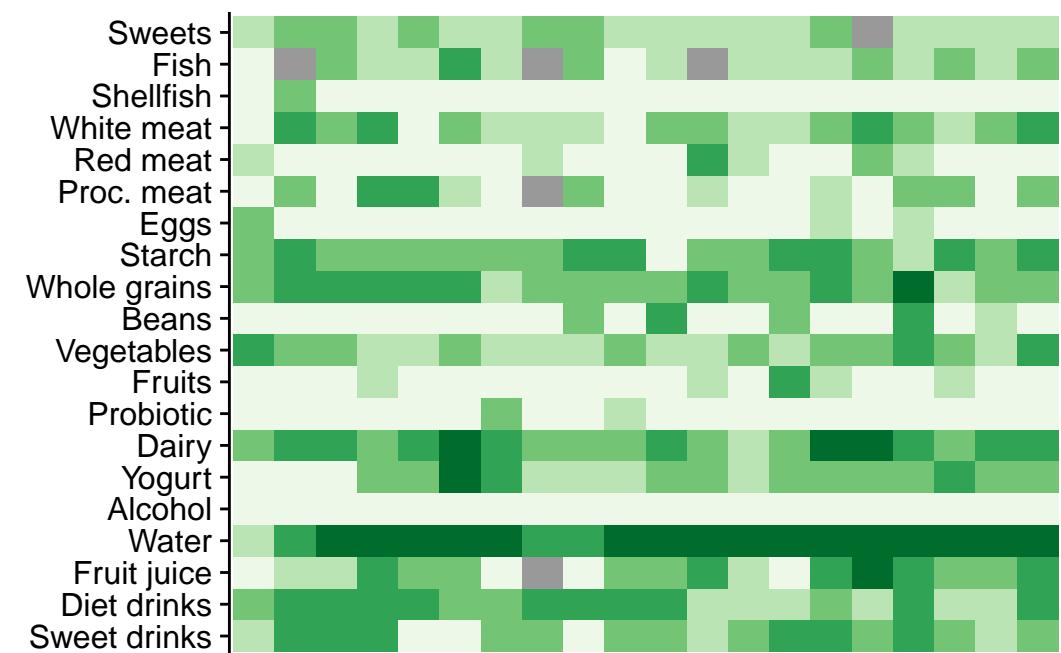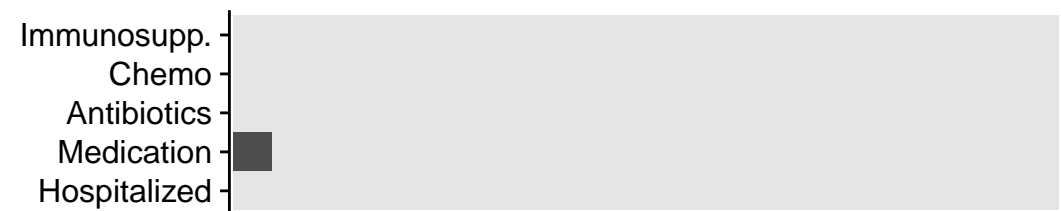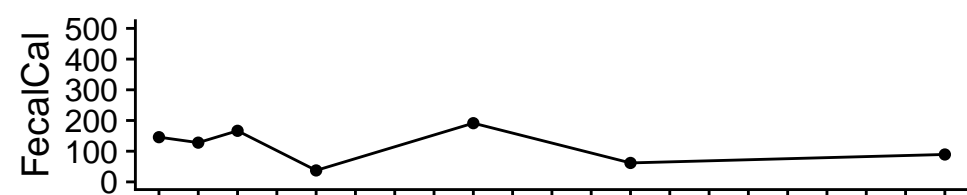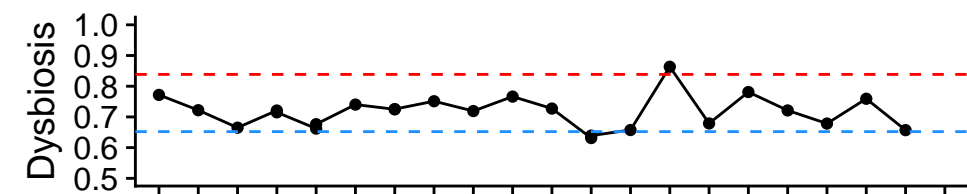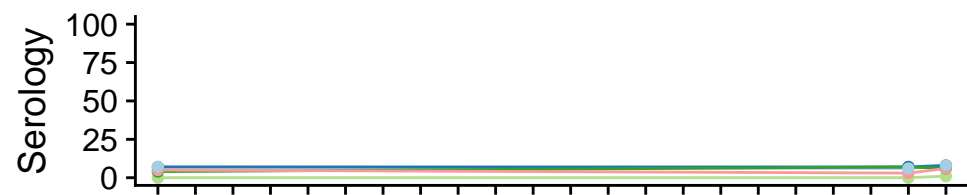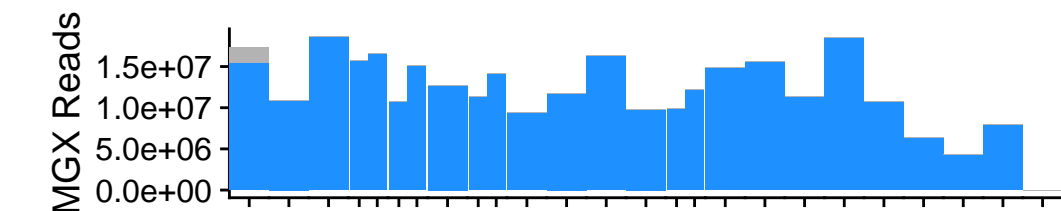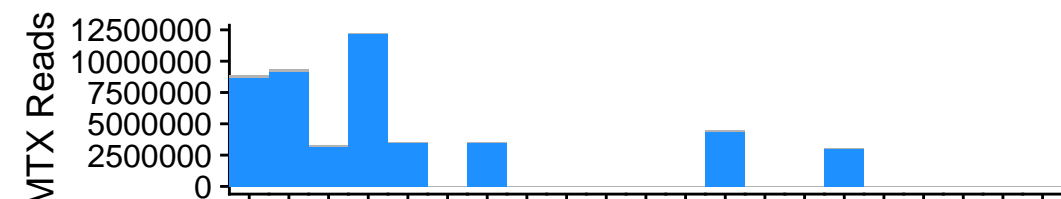

Blank  
None 7+ days  
Within 4-7 days  
Within 2-3 days  
Yesterday 1-2x  
Yesterday 3x+

No  
Blank

Dysbiosis  
Eubiosis

ANCA EU  
Cbir1 EU  
IgA ASCA EU  
IgG ASCA EU  
OmpC. EU

Human  
Filtered

Human  
Filtered

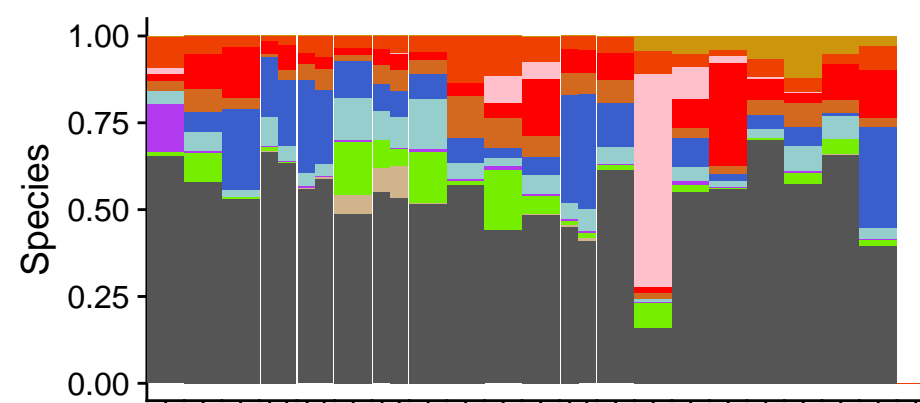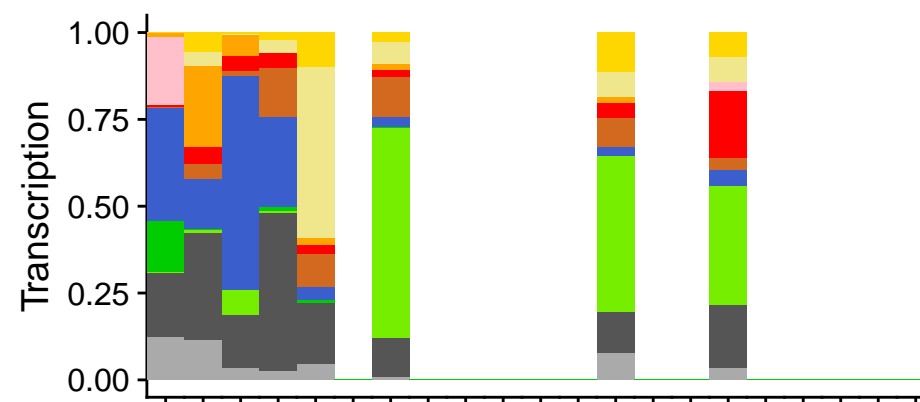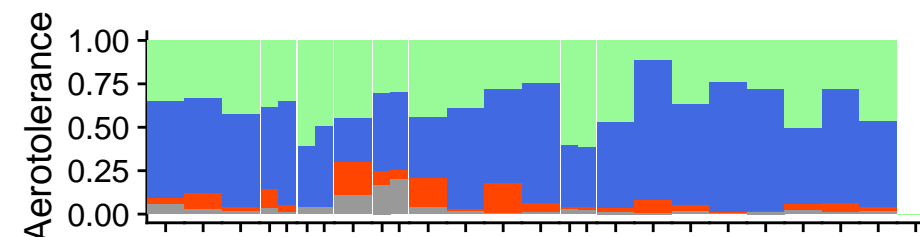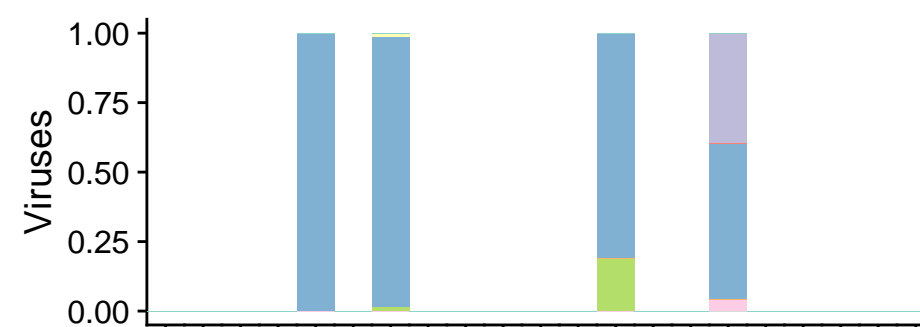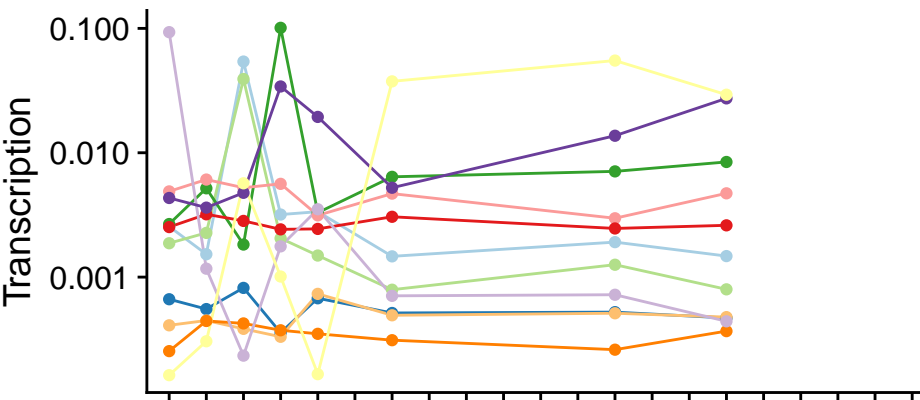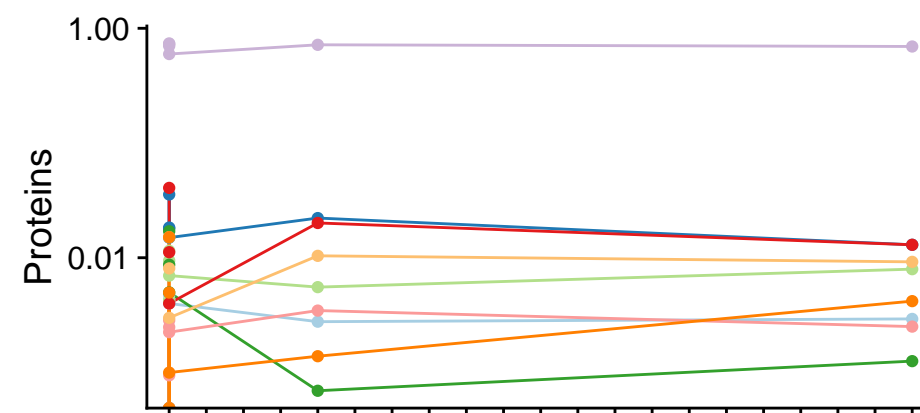

Alistipes putredinis  
Bacteroides caccae  
Bacteroides fragilis  
Bacteroides uniformis  
Bacteroides vulgatus  
Faecalibacterium prausnitzii  
Subdoligranulum unclassified  
Ruminococcus torques  
Escherichia coli  
C2likevirus unclassified  
other

Alistipes onderdonkii  
Alistipes finegoldii  
Bacteroides dorei  
Bacteroides fragilis  
Bacteroides uniformis  
Bacteroides vulgatus  
Faecalibacterium prausnitzii  
Akkermansia muciniphila  
Escherichia coli  
other  
unclassified

obligate\_anaerobe  
aerotolerant  
facultative\_anaerobe  
unknown

T7virus  
unclassified C2likevirus  
unclassified Siphoviridae  
Chicken anemia virus  
Gokushovirus WZ-2015a  
Ungulate protoparvovirus 1  
Pepper mild mottle virus  
Tobamovirus  
other

K00927: phosphoglycerate kinase [EC:2.7.2.3]  
K01358: ATP-dependent Clp protease, prote...  
K01803: triosephosphate isomerase (TIM) [E...  
K02914: large subunit ribosomal protein L34  
K02952: small subunit ribosomal protein S13  
K02996: small subunit ribosomal protein S9  
K03526: (E)-4-hydroxy-3-methylbut-2-enyl...  
K03816: xanthine phosphoribosyltransferase ...  
K04069: pyruvate formate lyase activating en...  
K04078: chaperonin GroES  
K06078: murein lipoprotein lipoprotein

K00024: malate dehydrogenase [EC:1.1.1.37]  
K00262: glutamate dehydrogenase (NADP+) ...  
K01610: phosphoenolpyruvate carboxykinase...  
K01805: xylose isomerase [EC:5.3.1.5]  
K02863: large subunit ribosomal protein L1  
K10117: raffinose/stachyose/melibiose transp...  
K10200: N-acetylglucosamine transport syst...  
K10540: methyl-galactoside transport syste...  
UNGROUPED

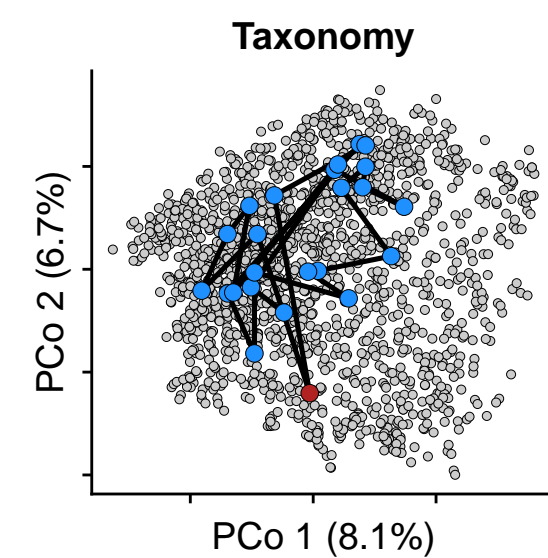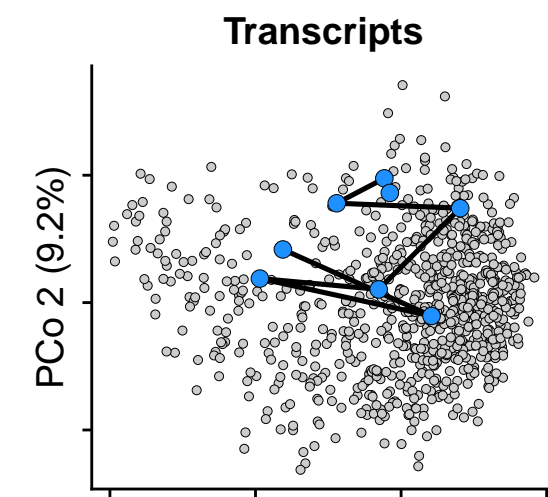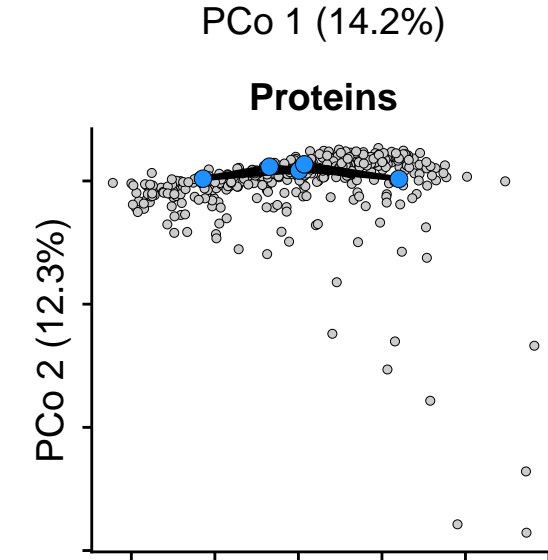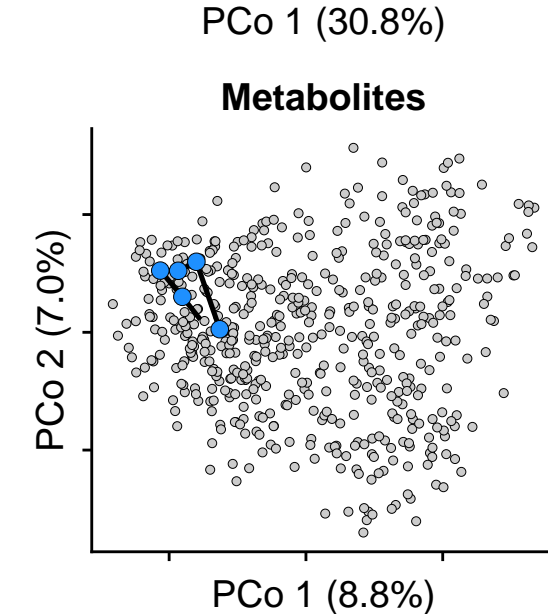

# H4009: 6 Female White Cincinnati | nonIBD

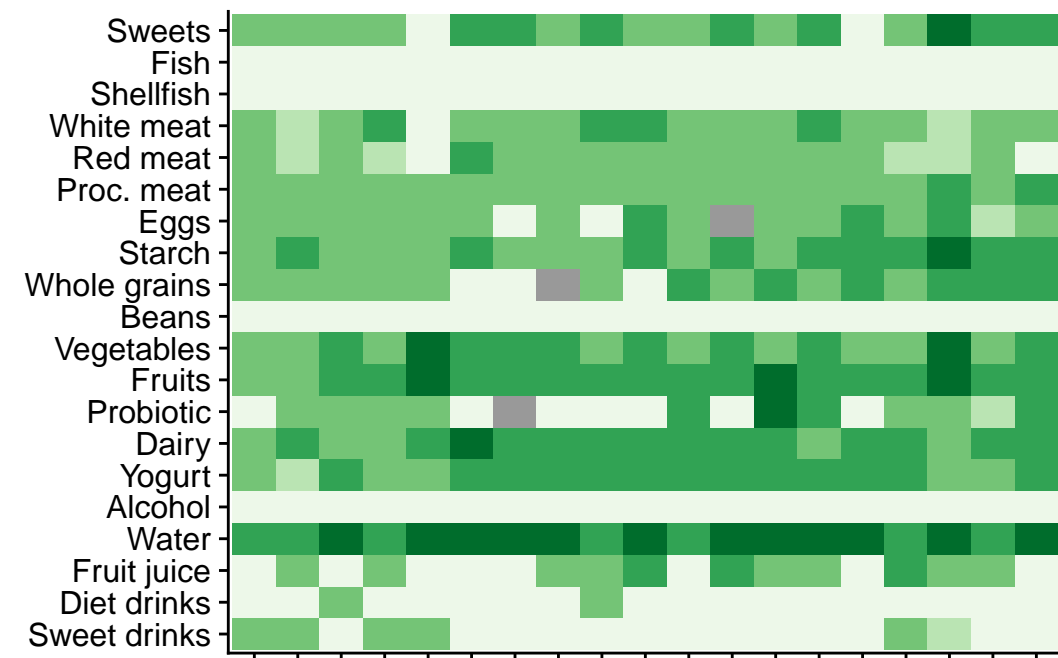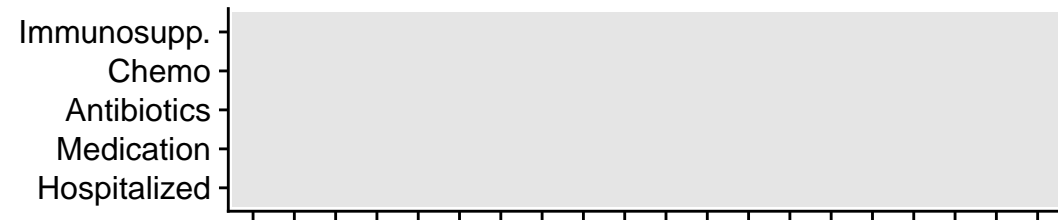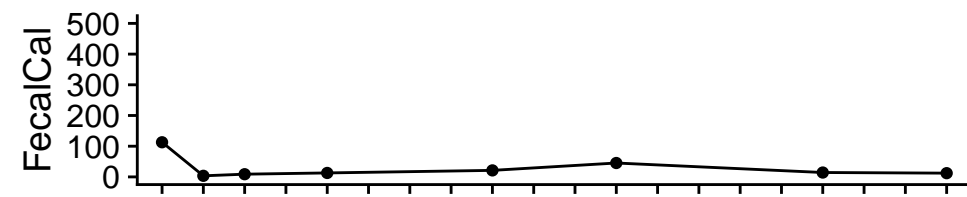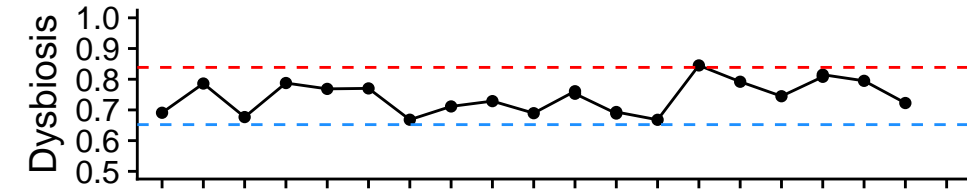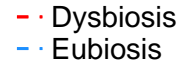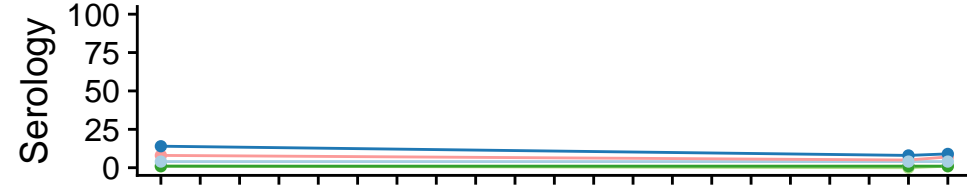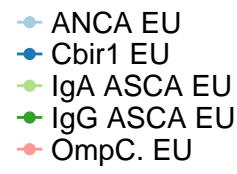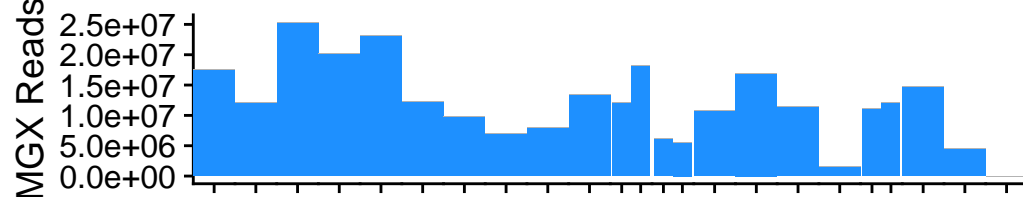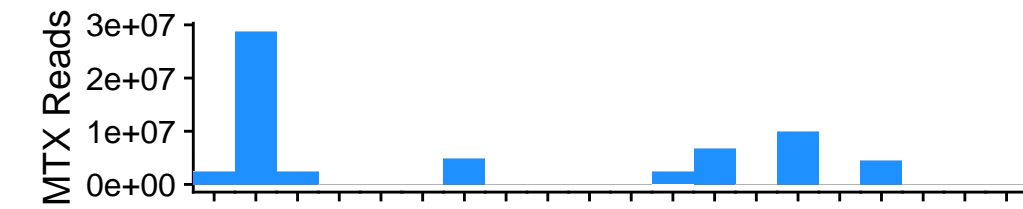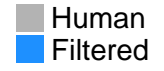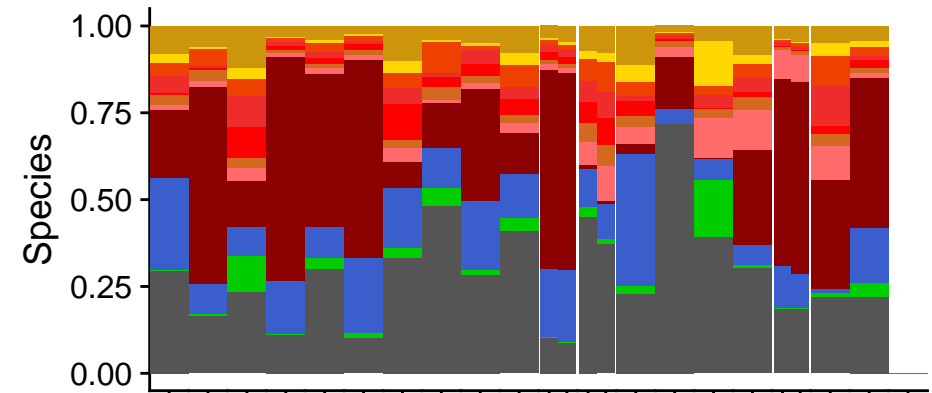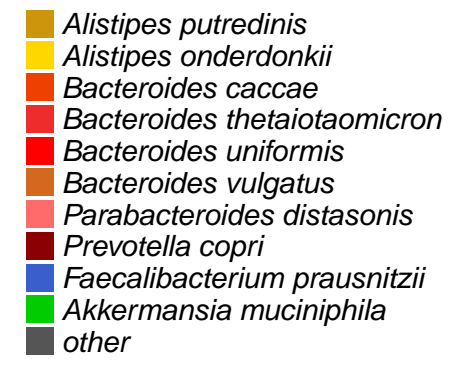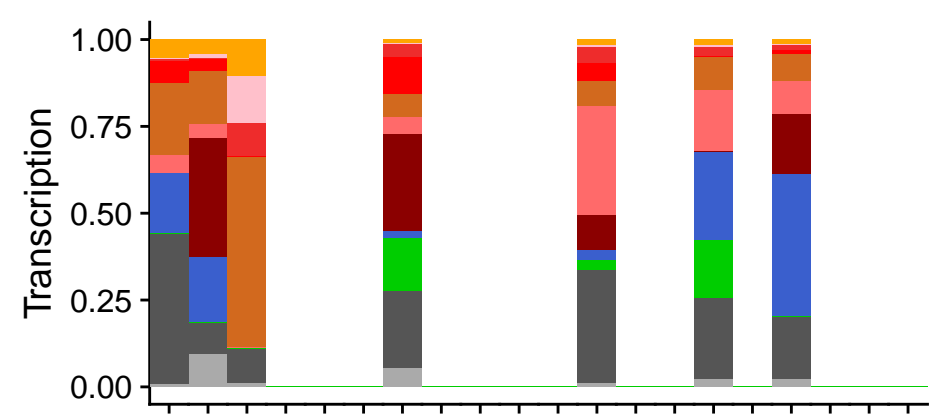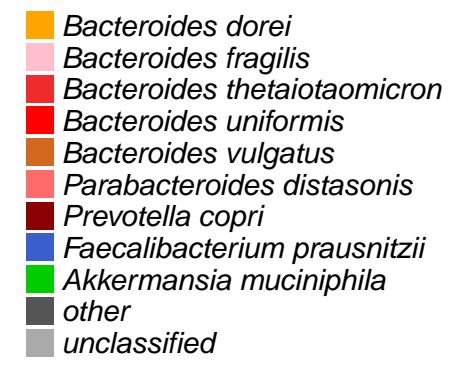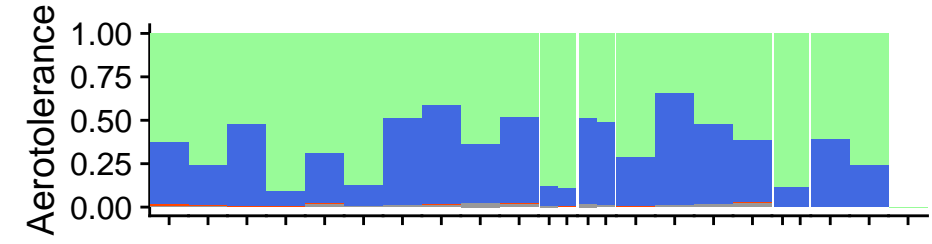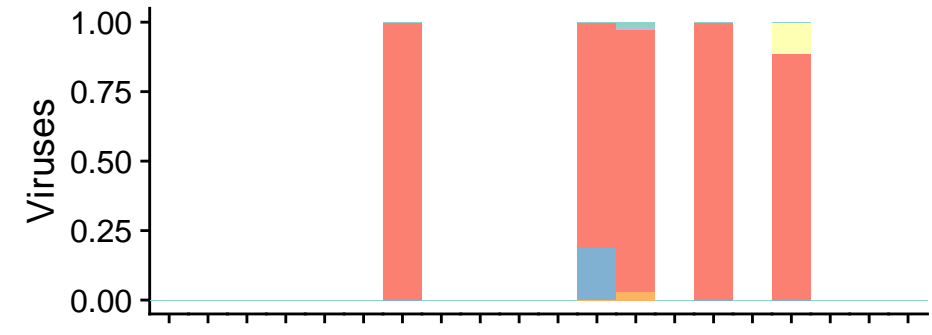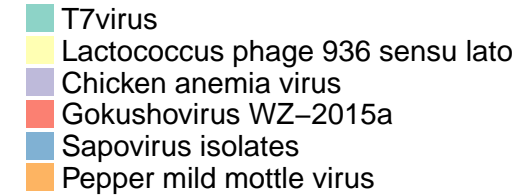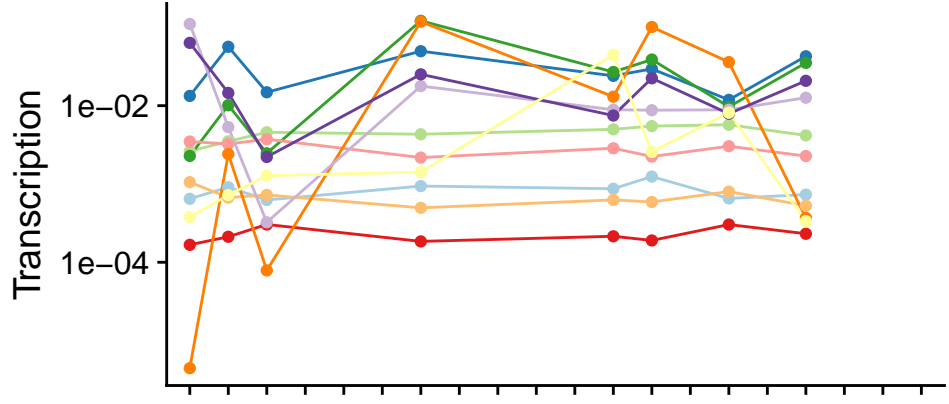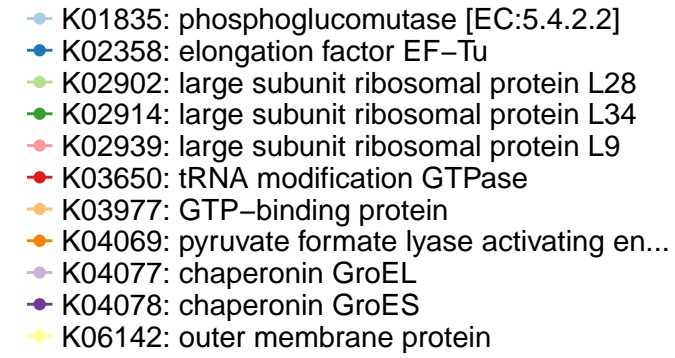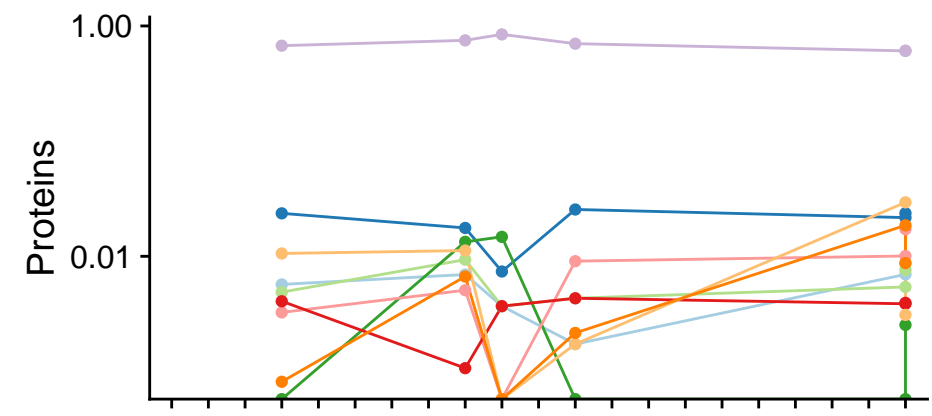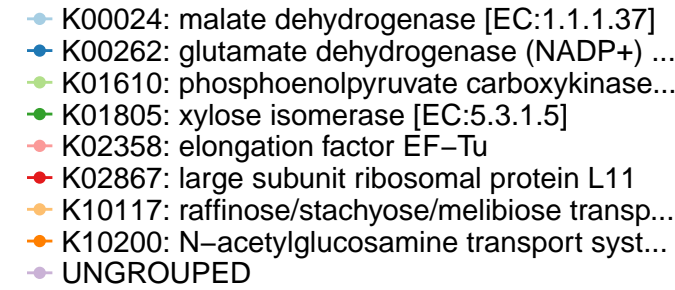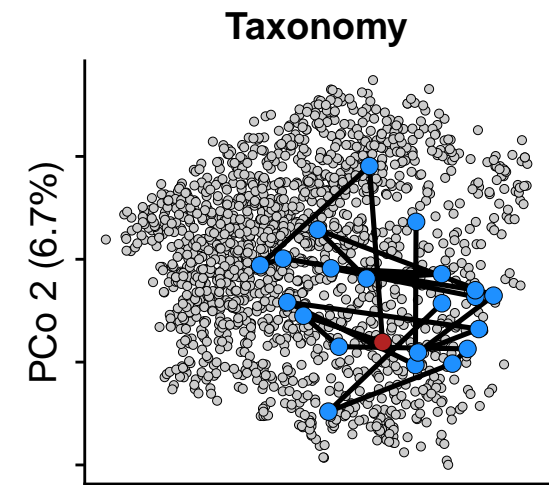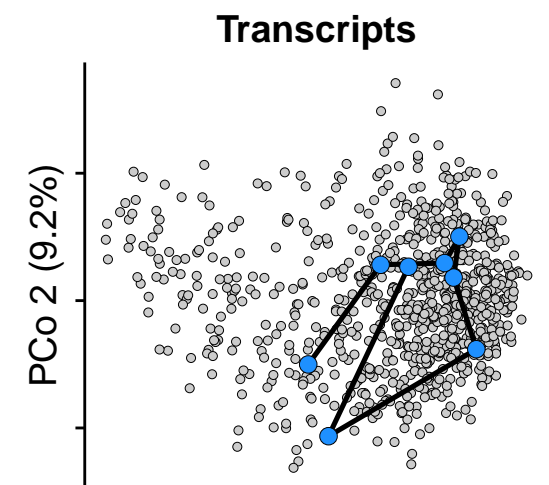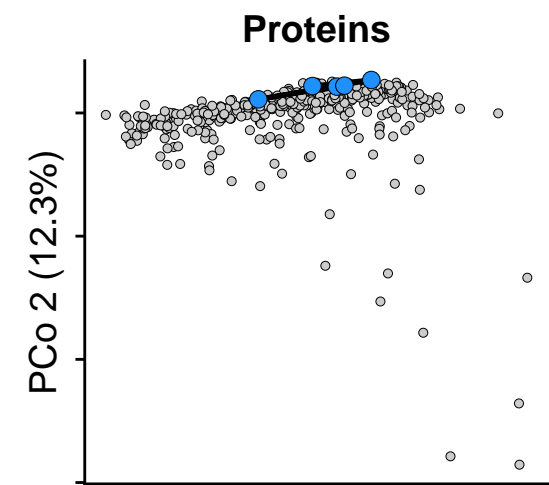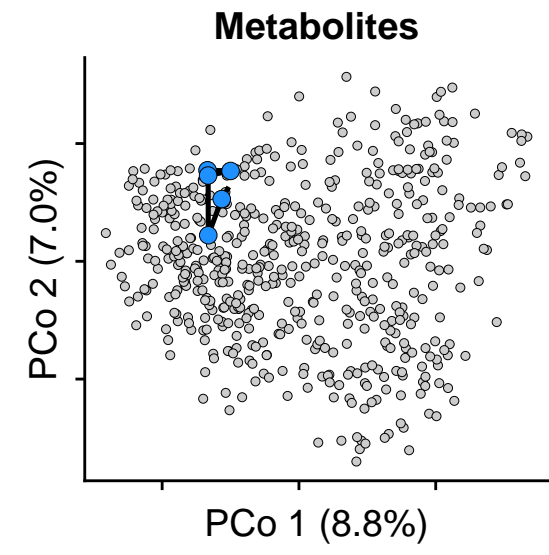

# H4010: 13 Male Black or African American Cincinnati | UC

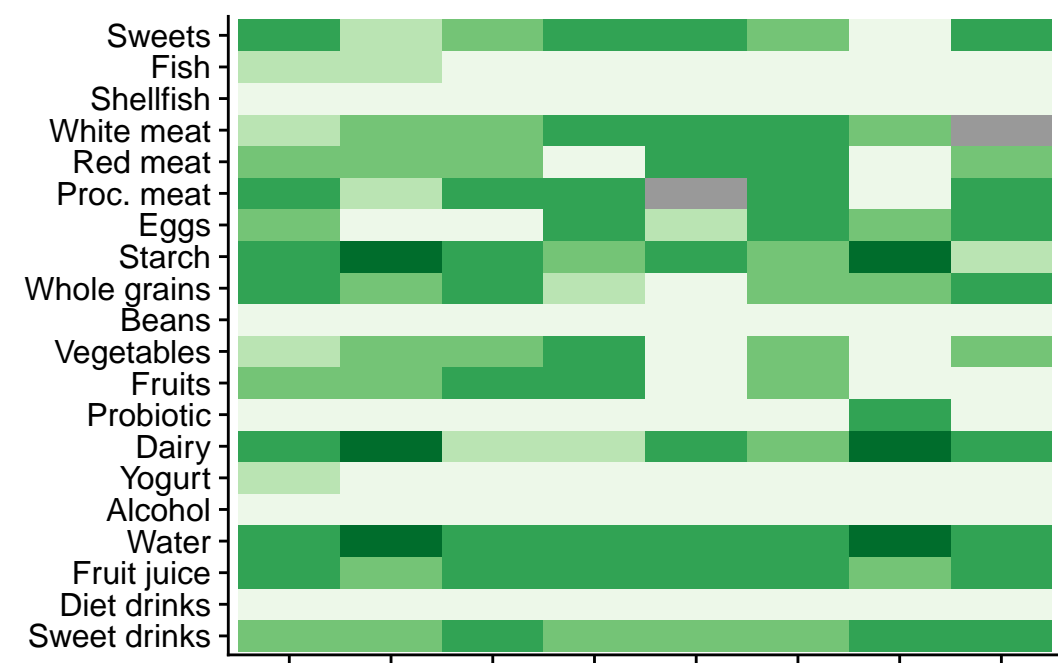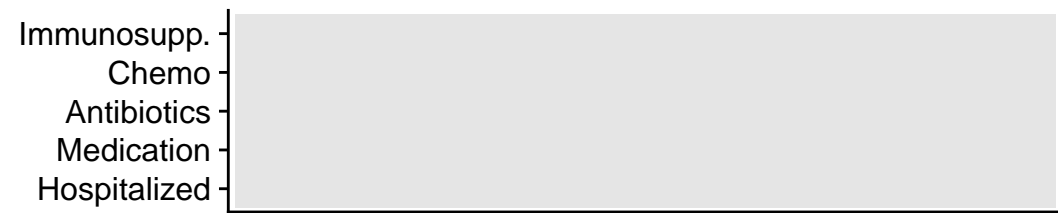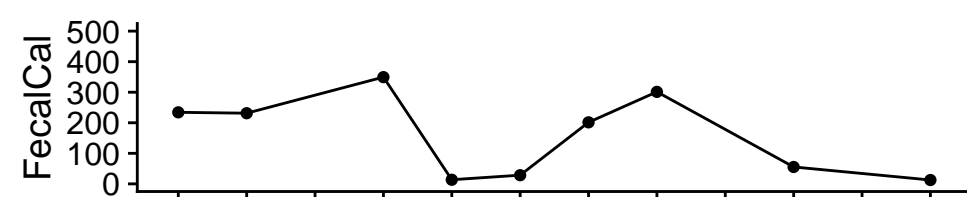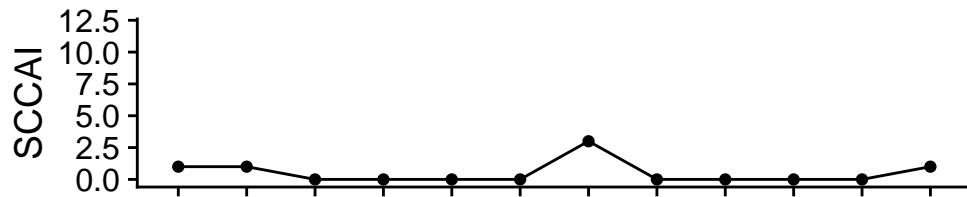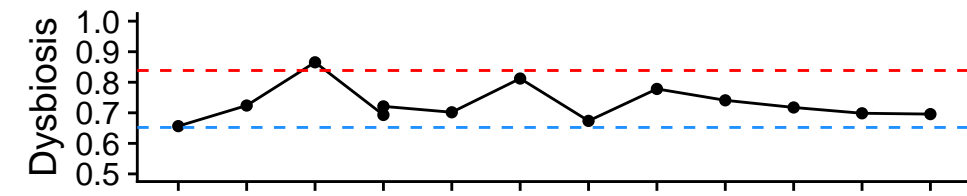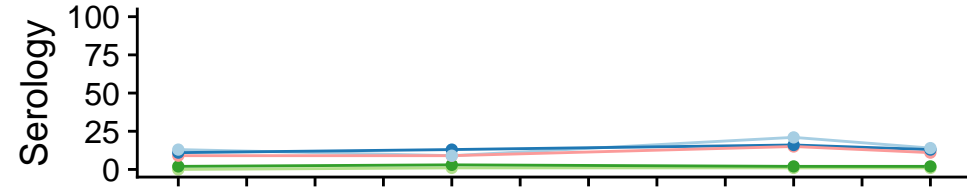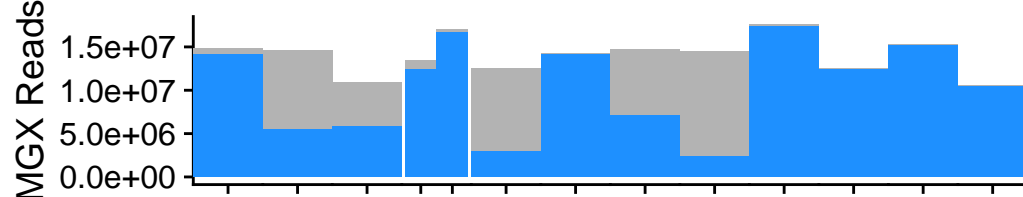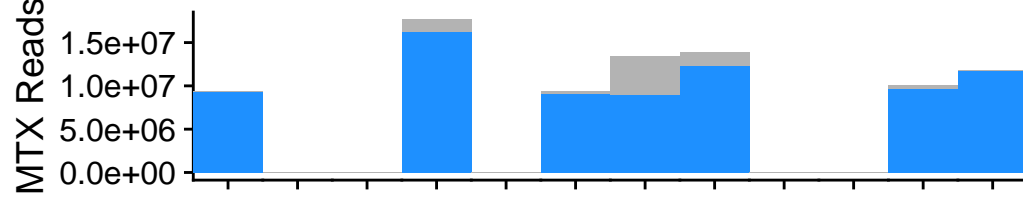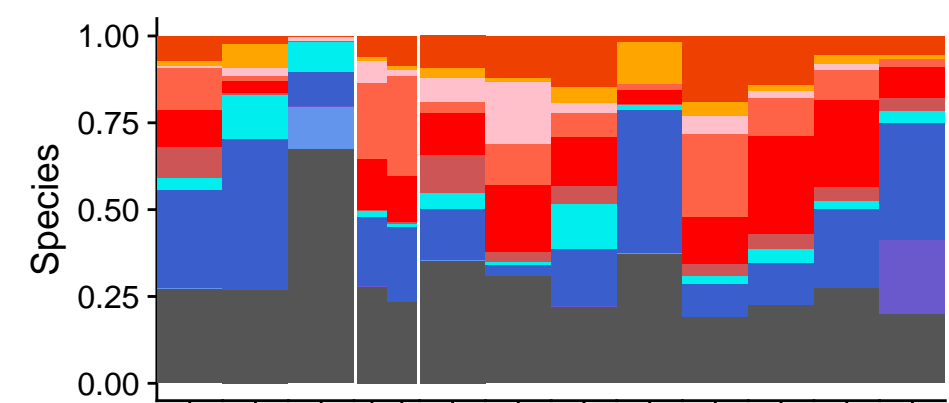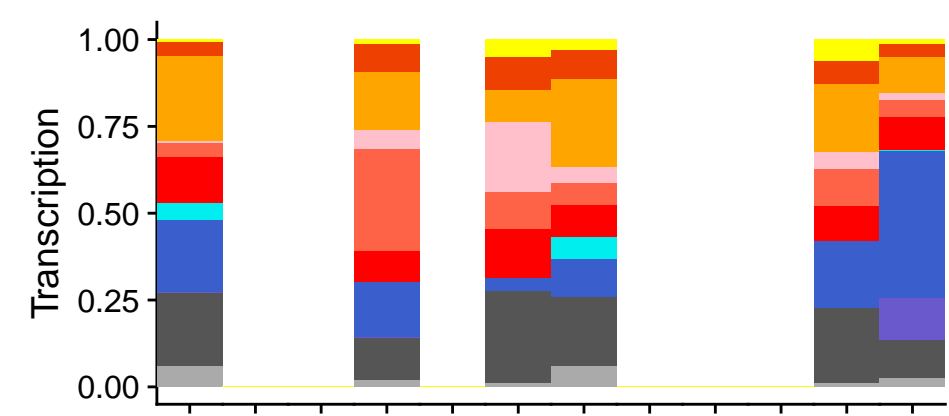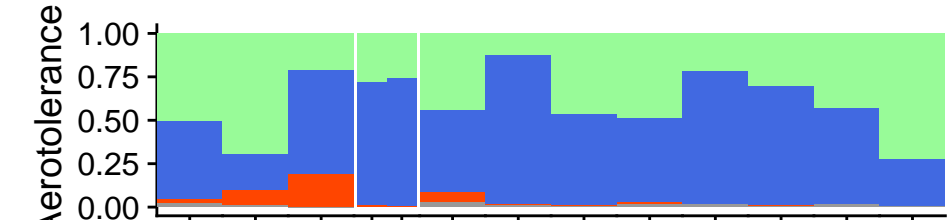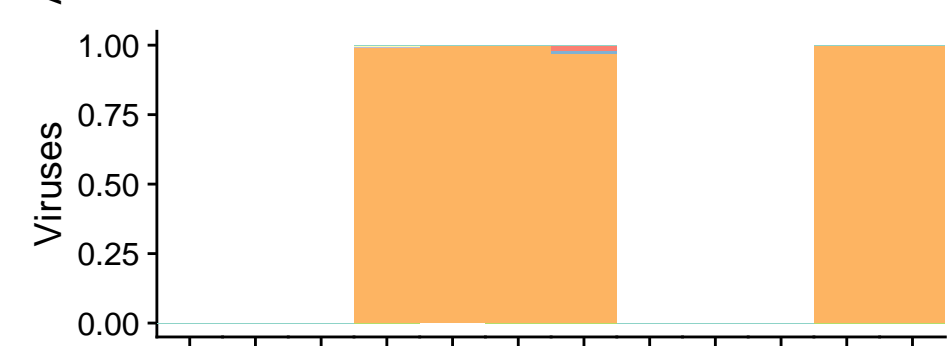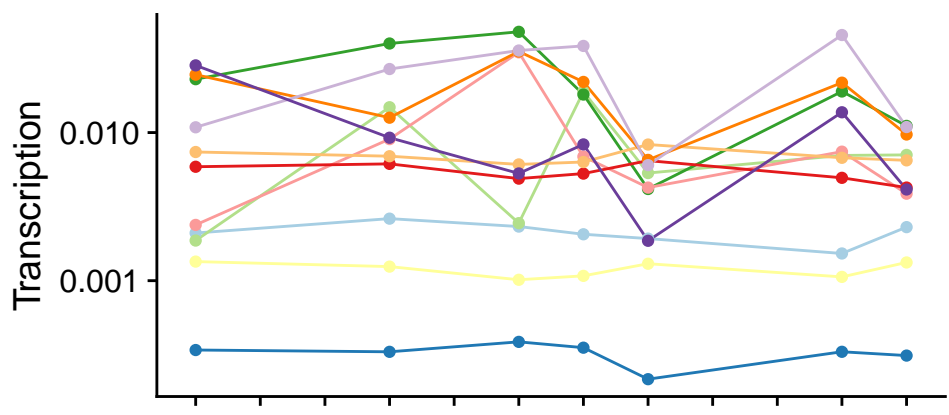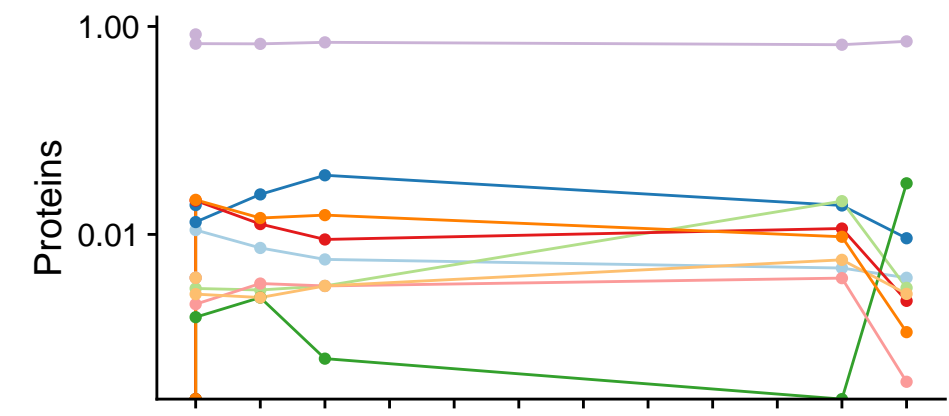

- Bacteroides caccae
- Bacteroides dorei
- Bacteroides fragilis
- Bacteroides ovatus
- Bacteroides uniformis
- Parabacteroides merdae
- Eubacterium rectale
- Faecalibacterium prausnitzii
- Roseburia intestinalis
- Streptococcus salivarius
- other

- Alistipes shahii
- Bacteroides caccae
- Bacteroides dorei
- Bacteroides fragilis
- Bacteroides ovatus
- Bacteroides uniformis
- Eubacterium rectale
- Faecalibacterium prausnitzii
- Roseburia intestinalis
- other
- unclassified

- obligate anaerobe
- aerotolerant
- facultative anaerobe
- unknown

- T7virus
- C2virus
- unclassified C2likevirus
- Leuconostoc phage phiLN03
- unclassified Siphoviridae
- Gokushovirus WZ-2015a
- Cucumber green mottle mosaic virus
- NA

- K00762: orotate phosphoribosyltransferase [...]
- K01495: GTP cyclohydrolase I [EC:3.5.4.16]
- K01834: 2,3-bisphosphoglycerate-depende...
- K02078: acyl carrier protein
- K02909: large subunit ribosomal protein L31
- K02931: large subunit ribosomal protein L5
- K02954: small subunit ribosomal protein S14
- K02968: small subunit ribosomal protein S20
- K03088: RNA polymerase sigma-70 factor, E...
- K04078: chaperonin GroES
- K09903: uridylyate kinase [EC:2.7.4.22]

- K00134: glyceraldehyde 3-phosphate dehydr...
- K00262: glutamate dehydrogenase (NADP+) ...
- K00626: acetyl-CoA C-acetyltransferase [E...
- K01805: xylose isomerase [EC:5.3.1.5]
- K01939: adenylosuccinate synthase [EC:6.3....
- K02358: elongation factor EF-Tu
- K02994: small subunit ribosomal protein S8
- K04077: chaperonin GroEL
- UNGROUPED

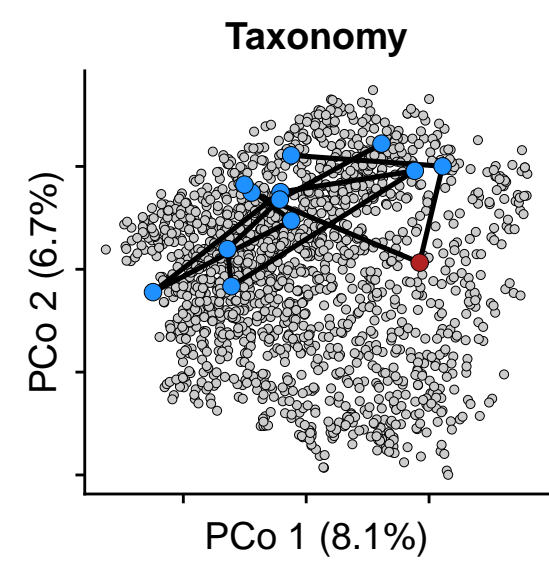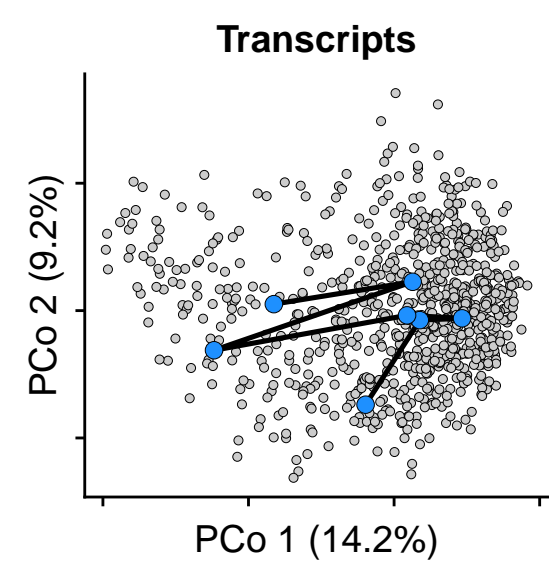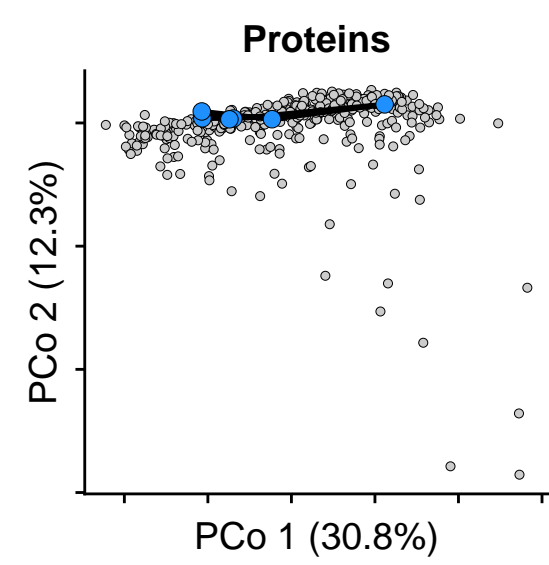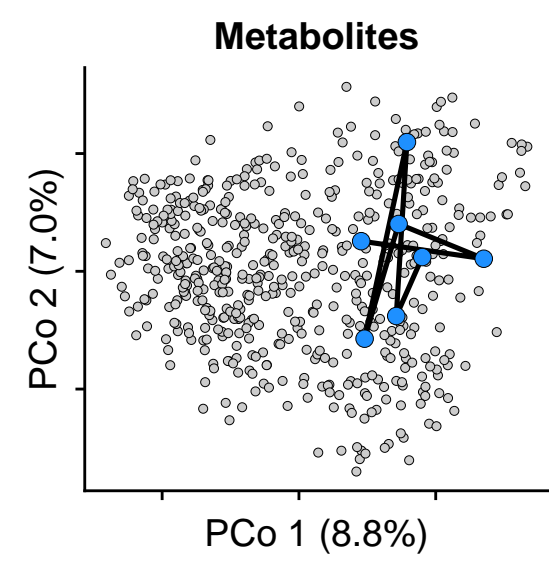

### H4013: 8 Male More than one race Cincinnati | nonIBD

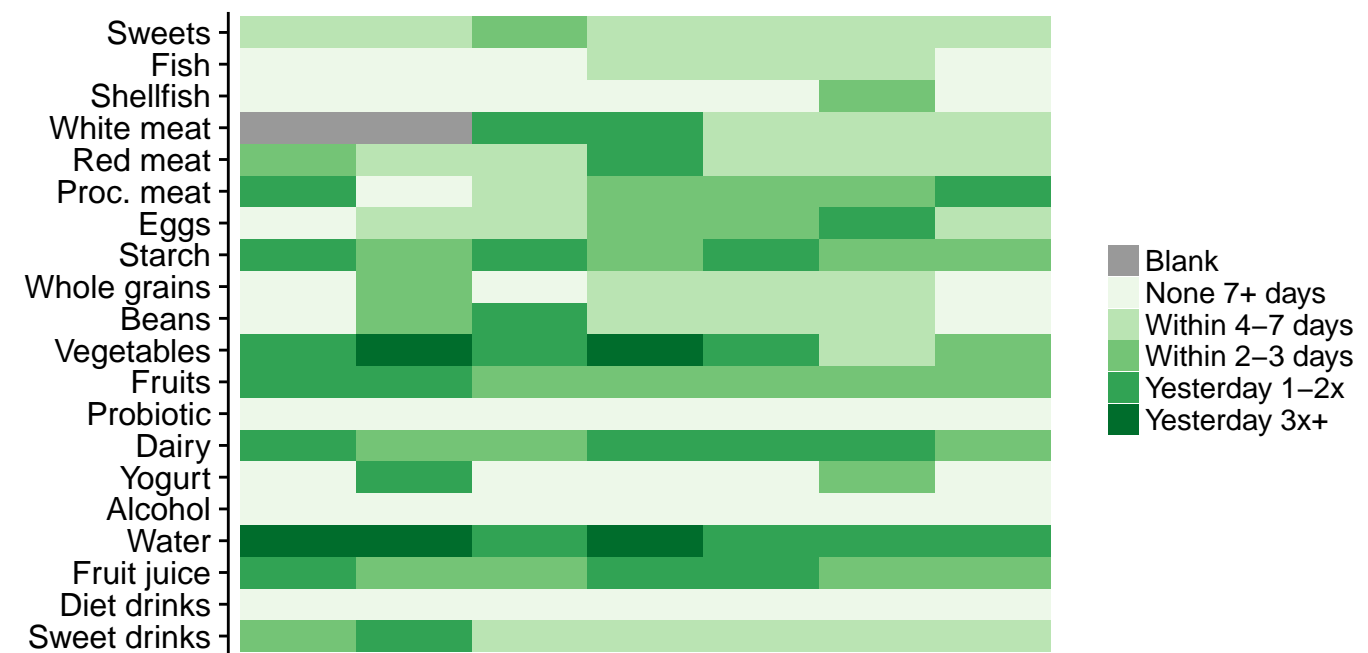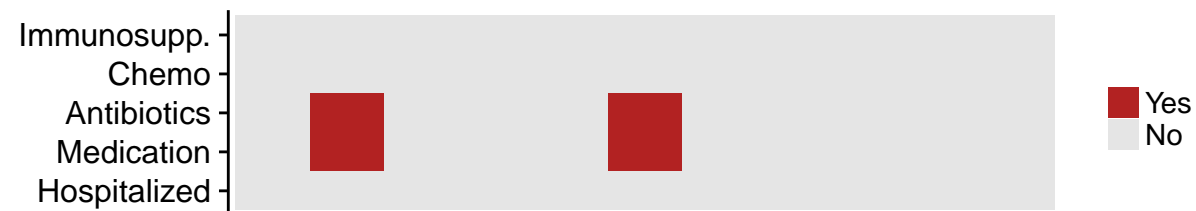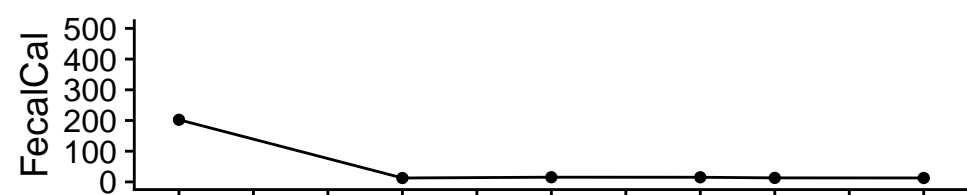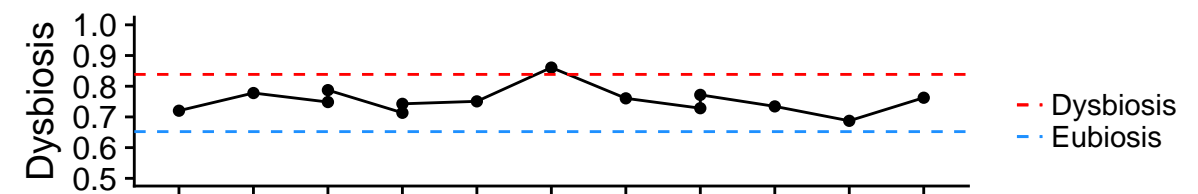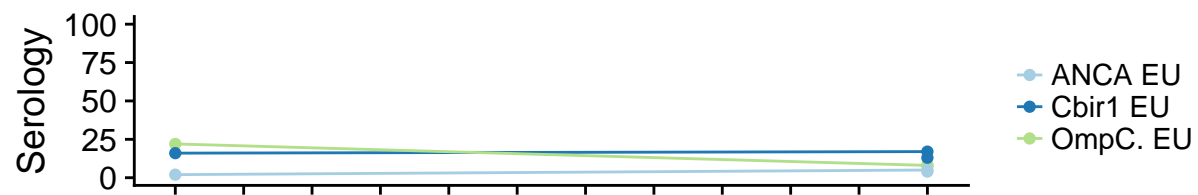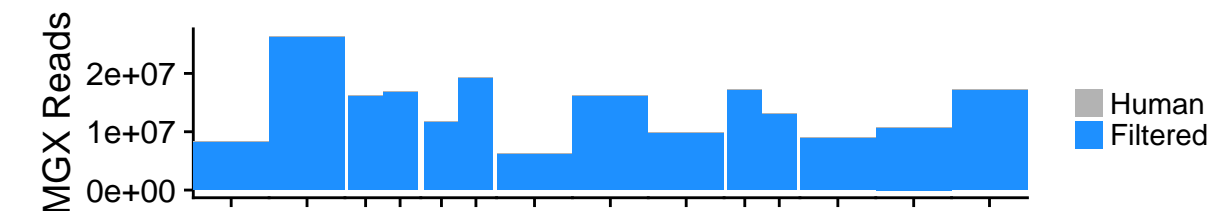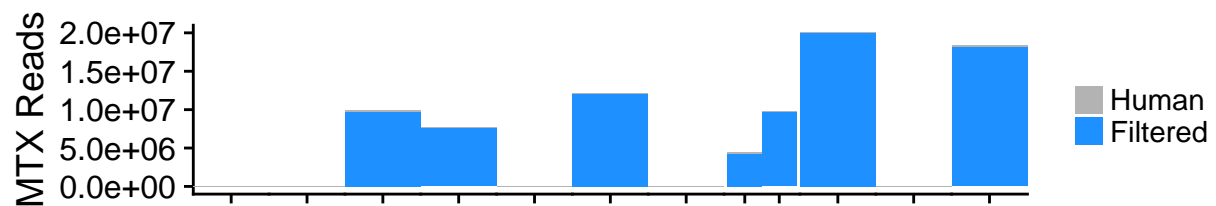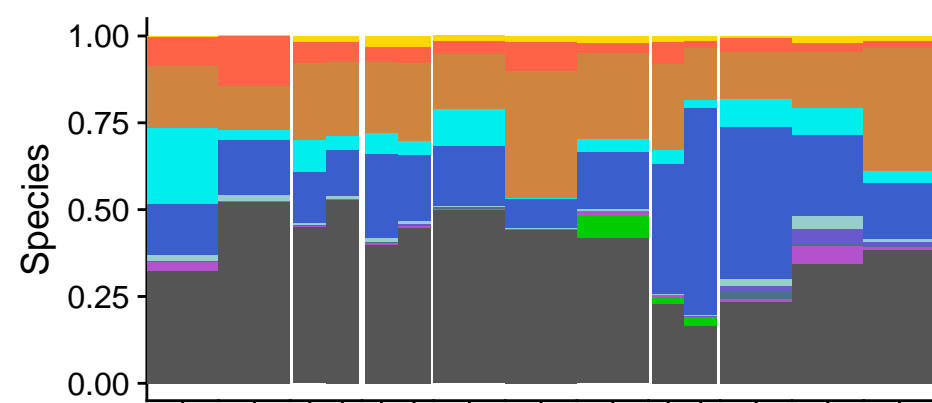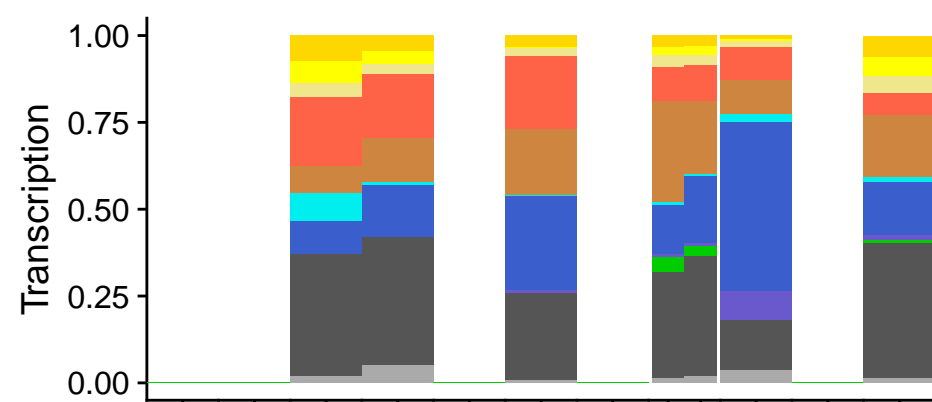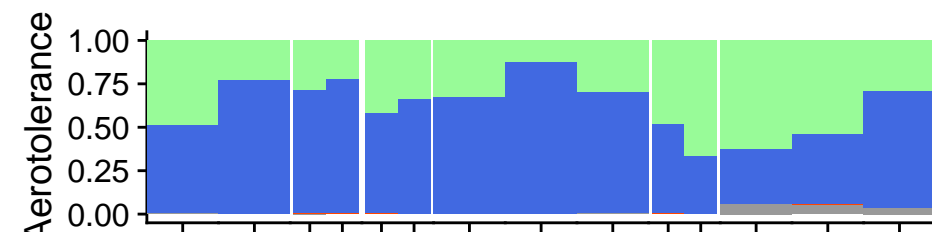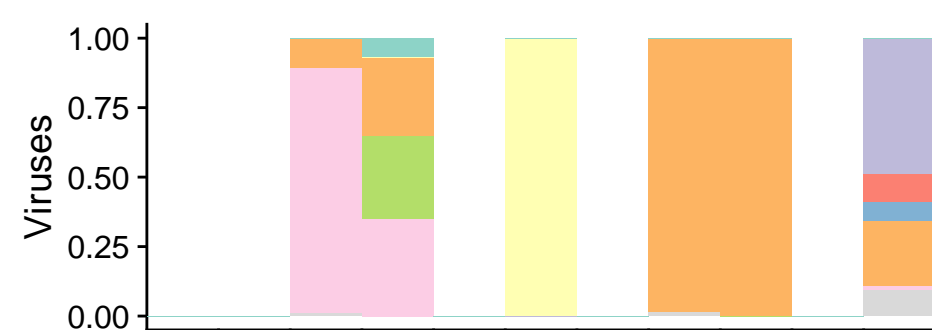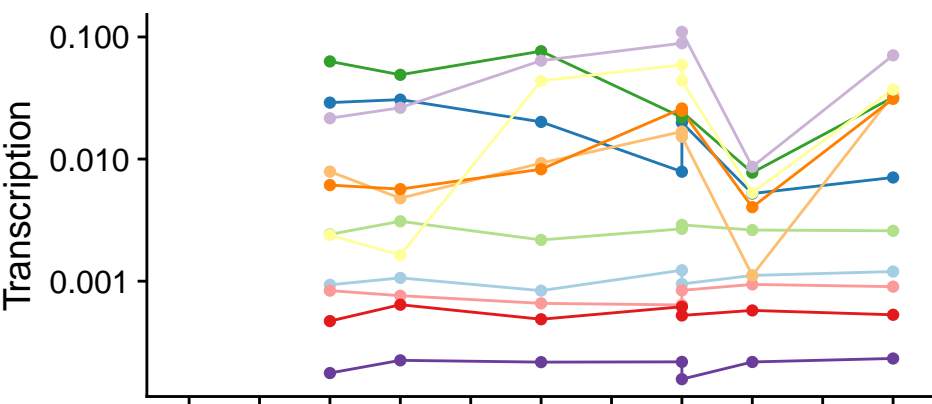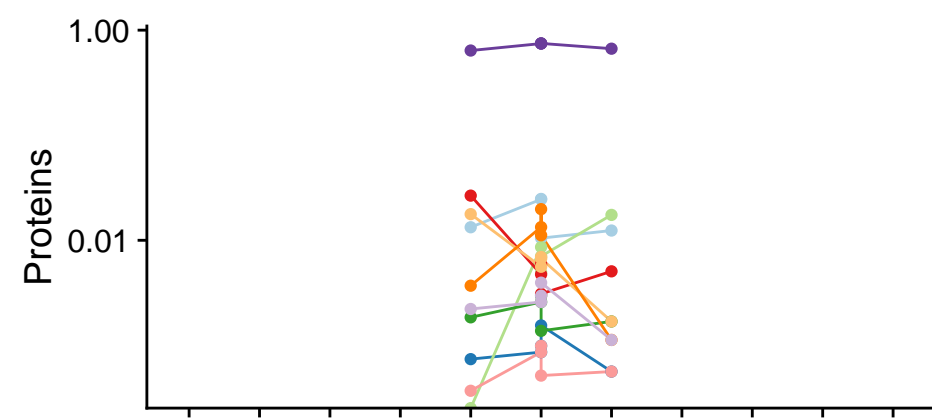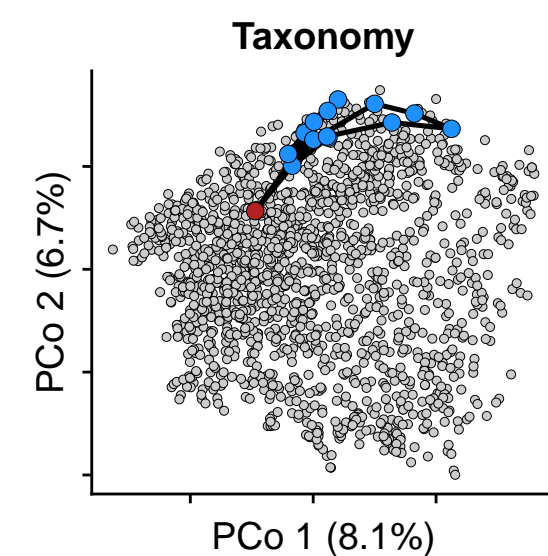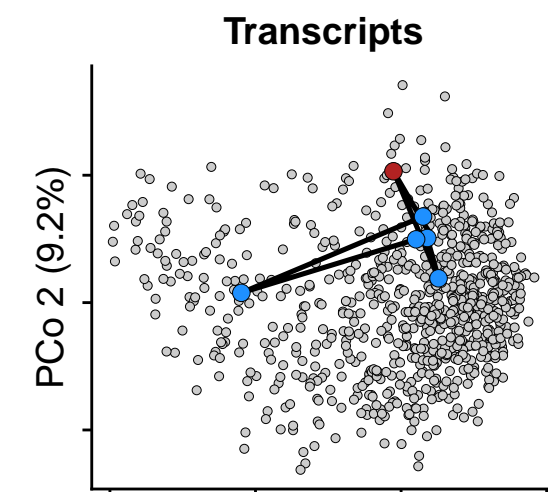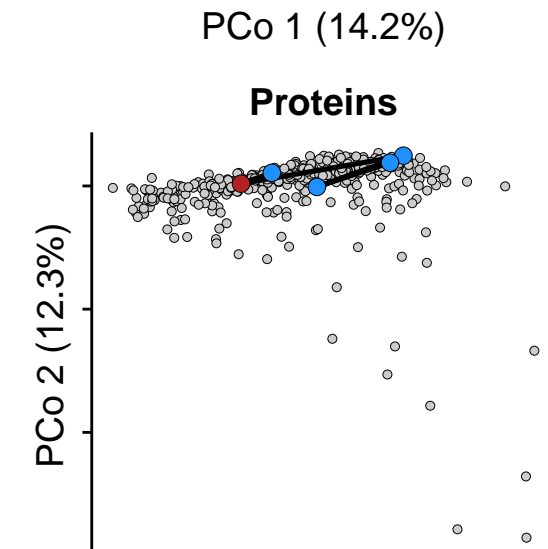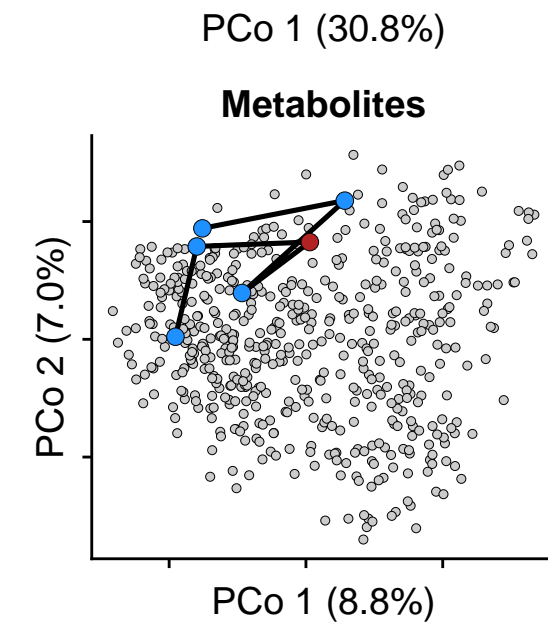

# H4014: 10 Female White Cincinnati | CD L3+L4

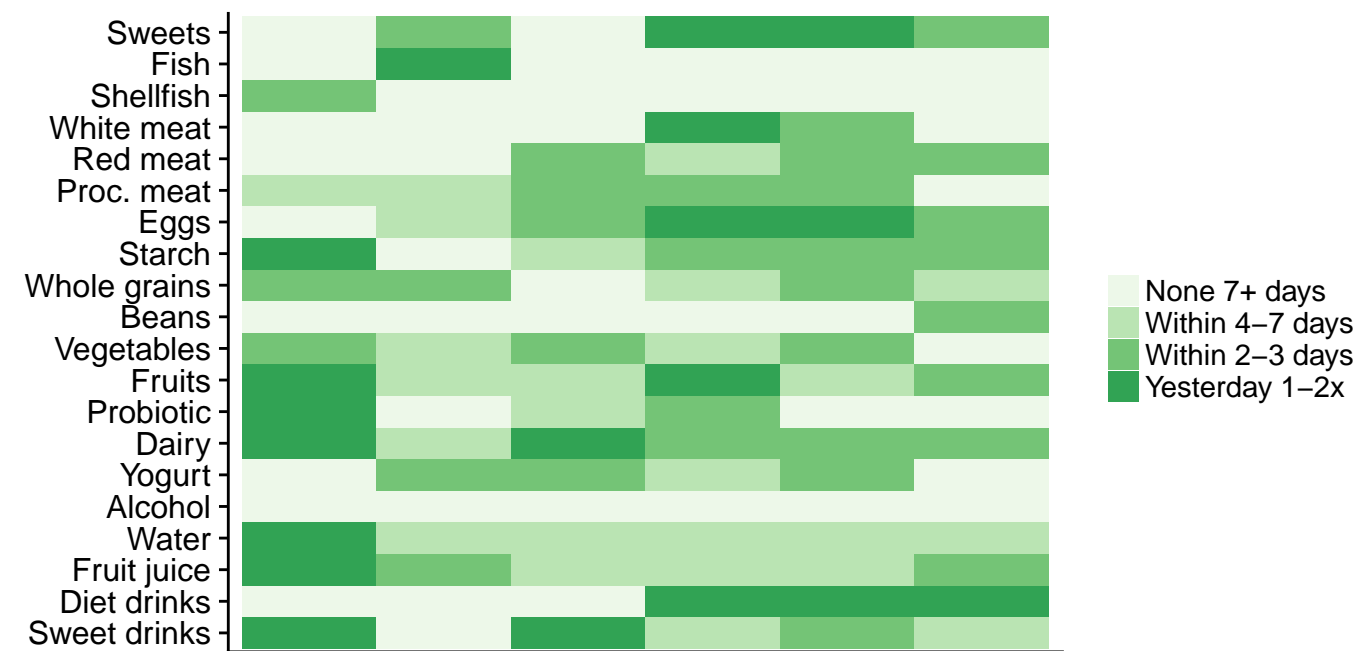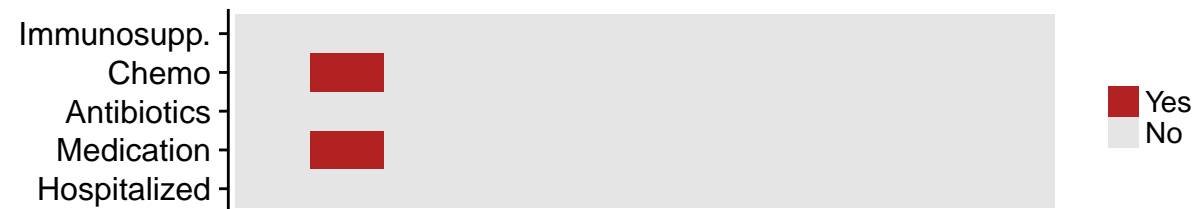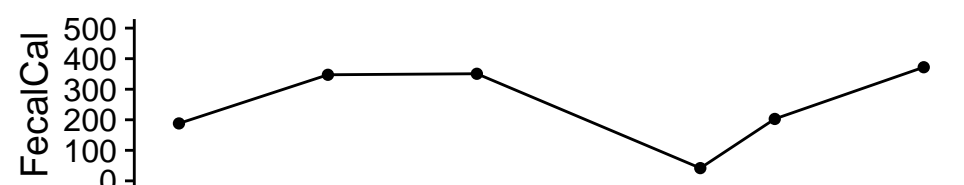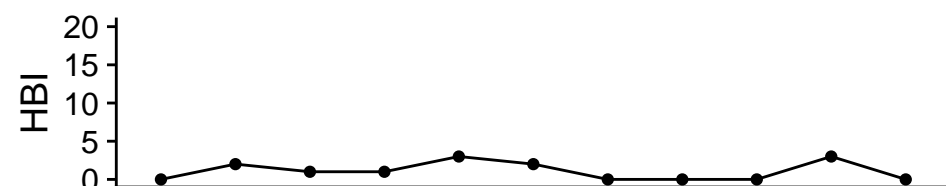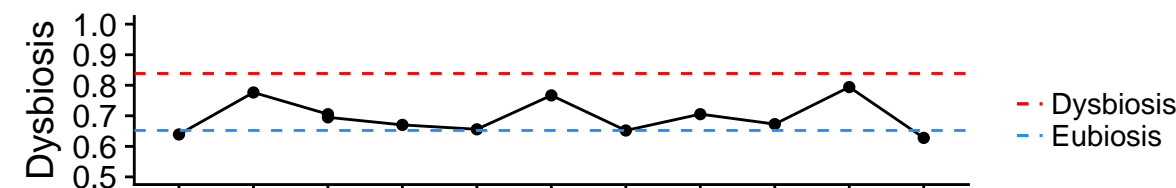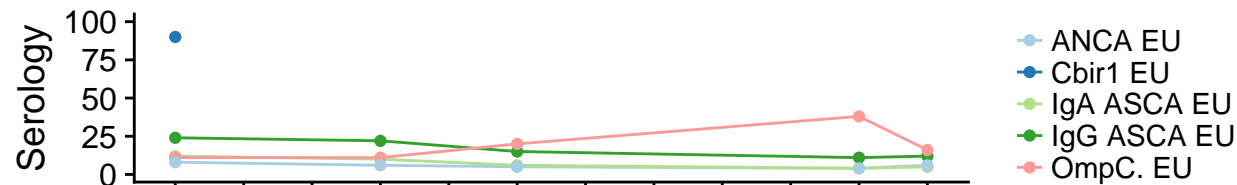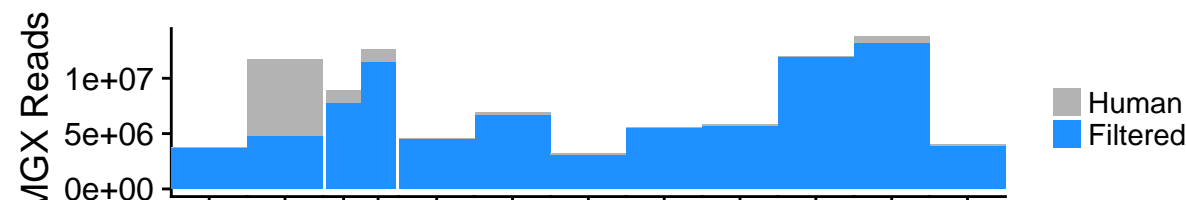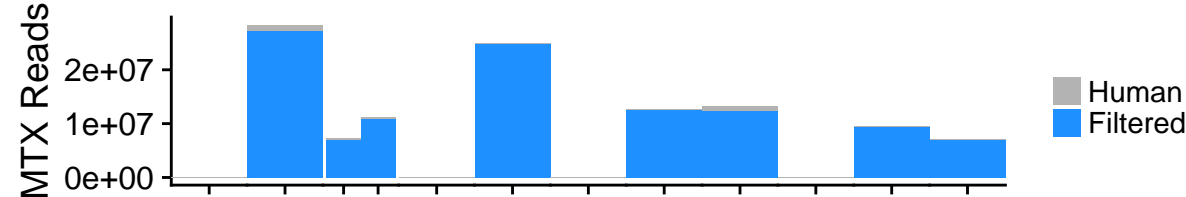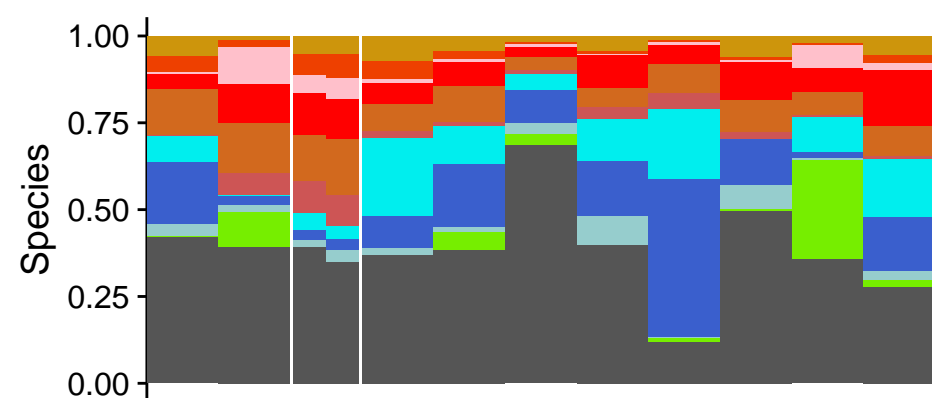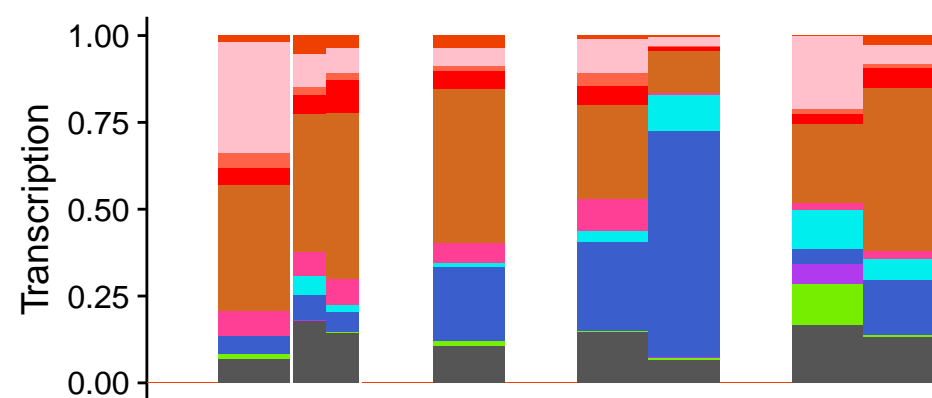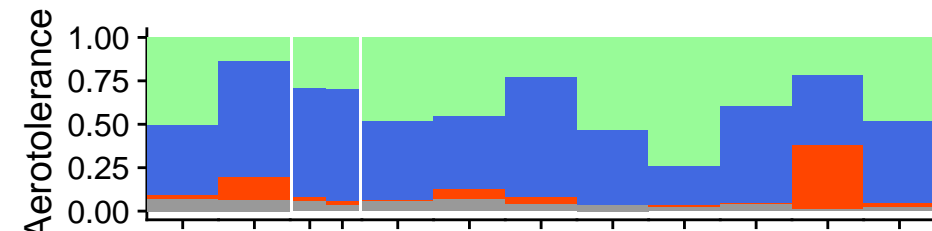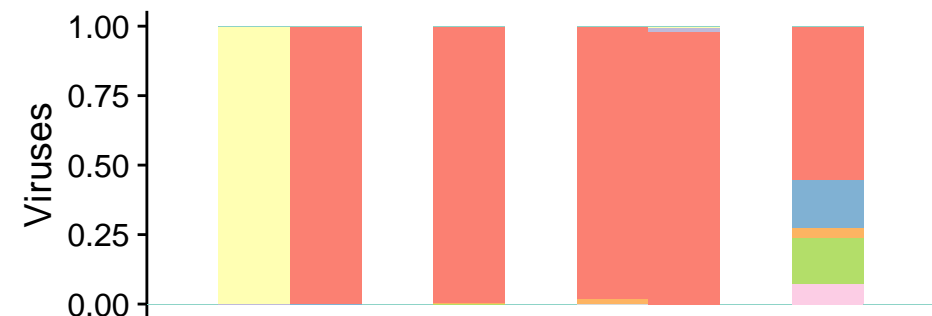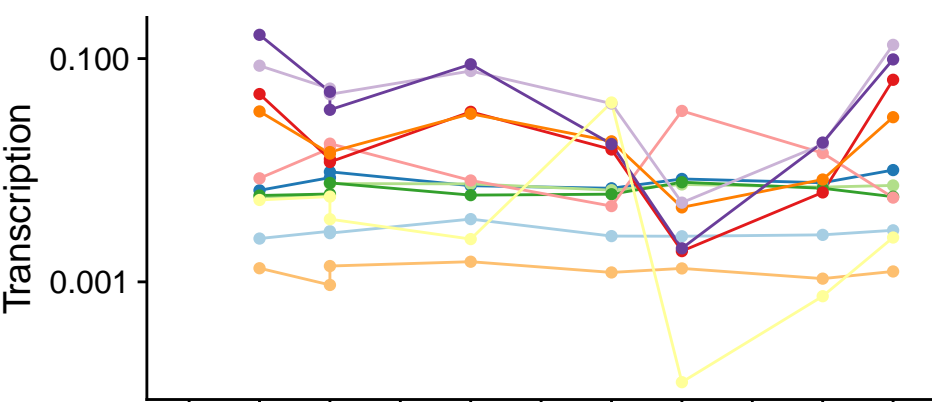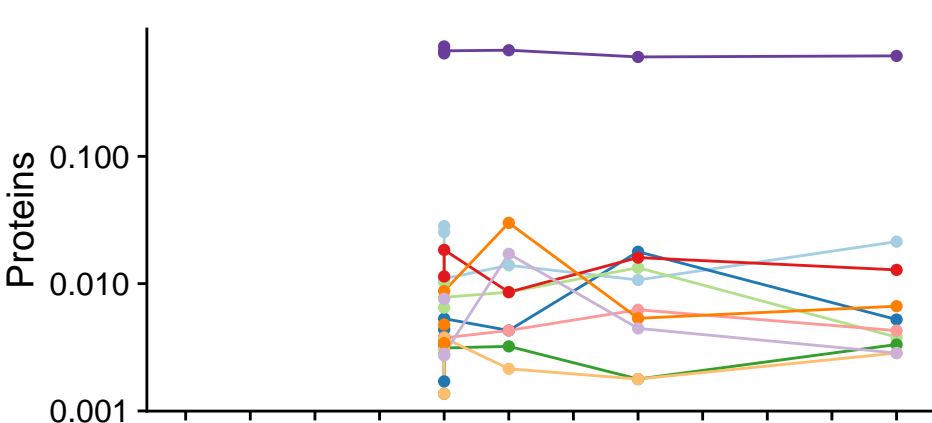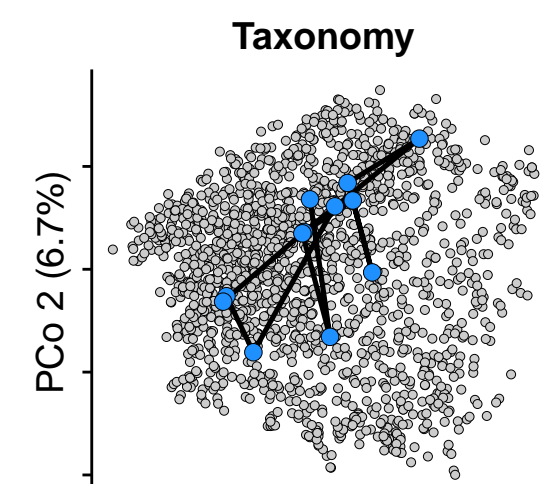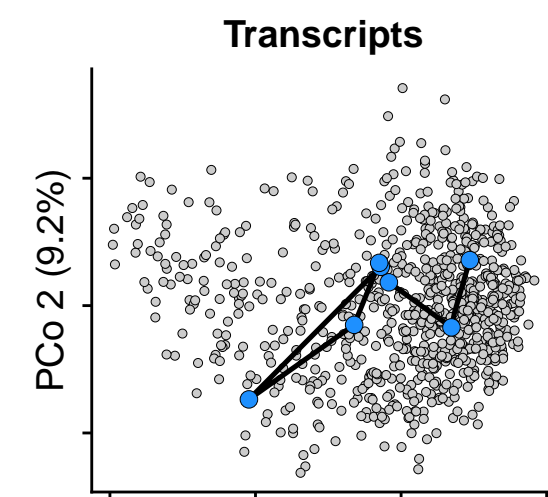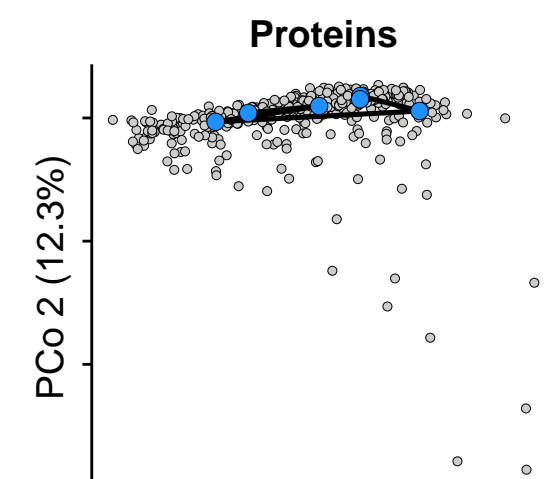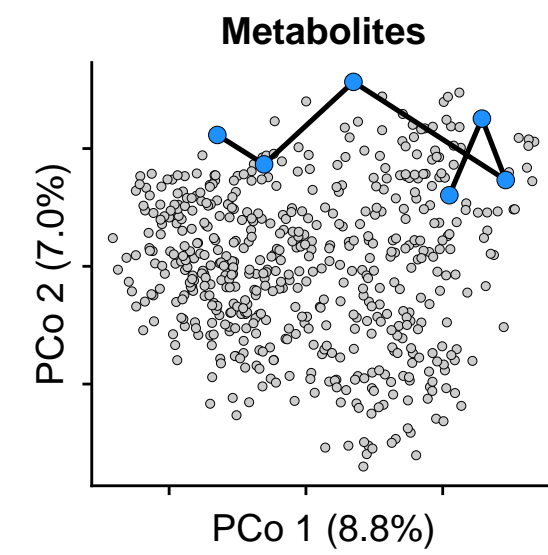

# H4015: 15 Male White Cincinnati | CD L3+L4

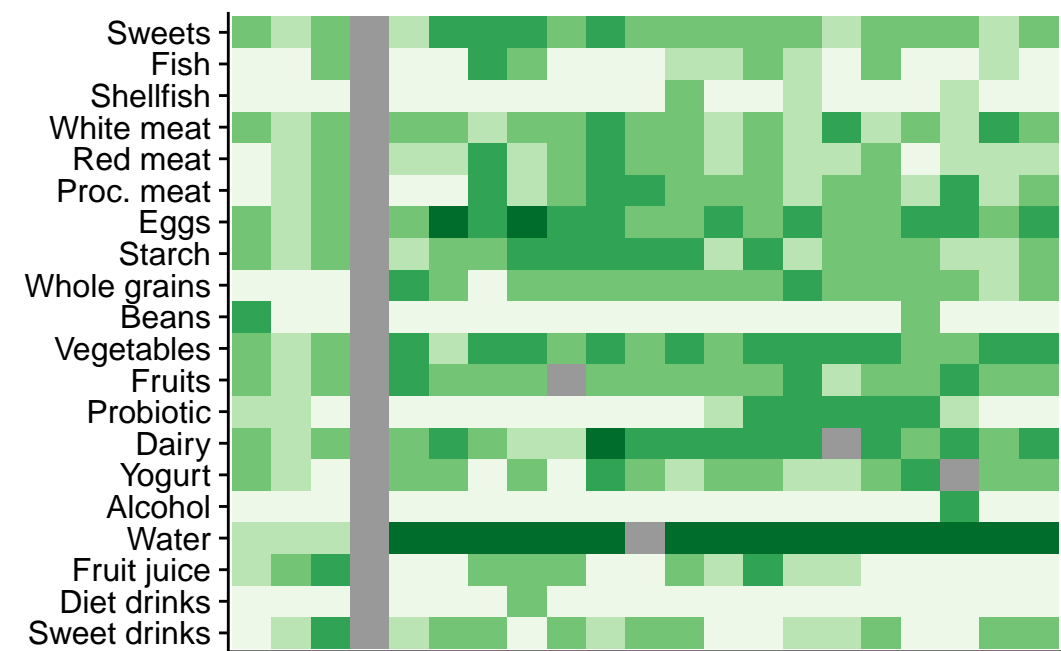

Blank  
None 7+ days  
Within 4-7 days  
Within 2-3 days  
Yesterday 1-2x  
Yesterday 3x+

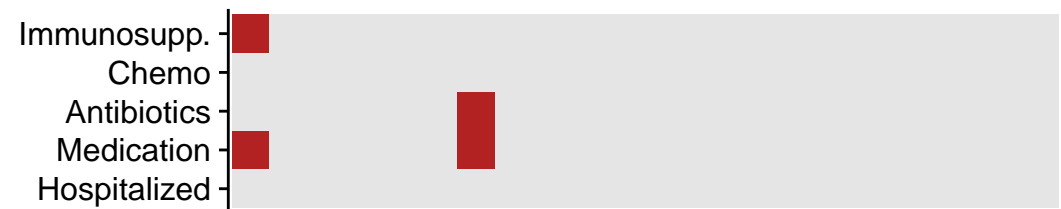

Yes  
No

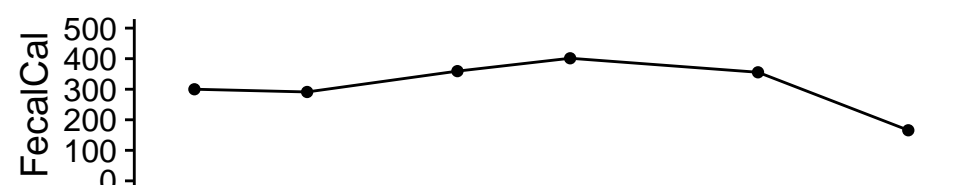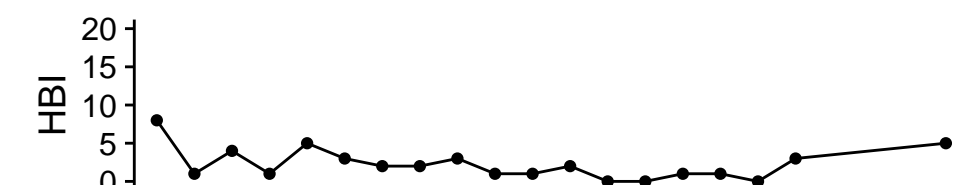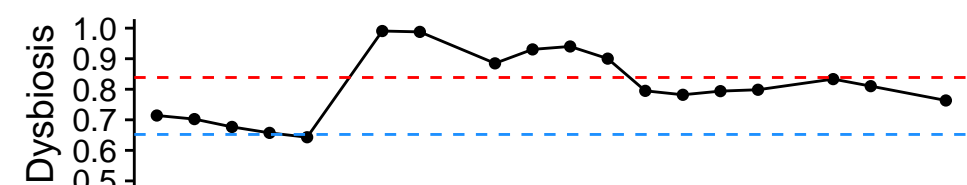

Dysbiosis  
Eubiosis

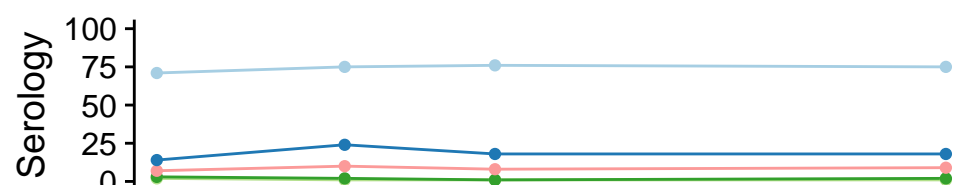

ANCA EU  
Cbir1 EU  
IgA ASCA EU  
IgG ASCA EU  
OmpC. EU

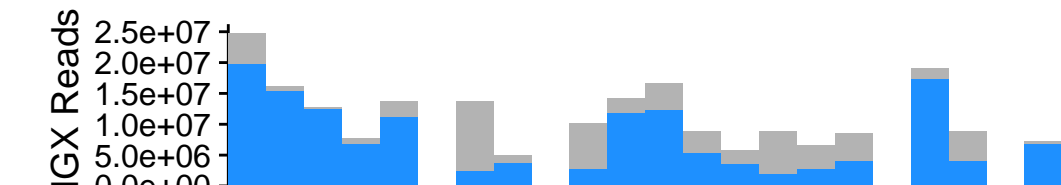

Human  
Filtered

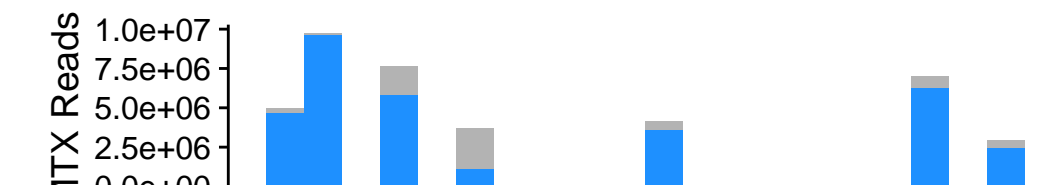

Human  
Filtered

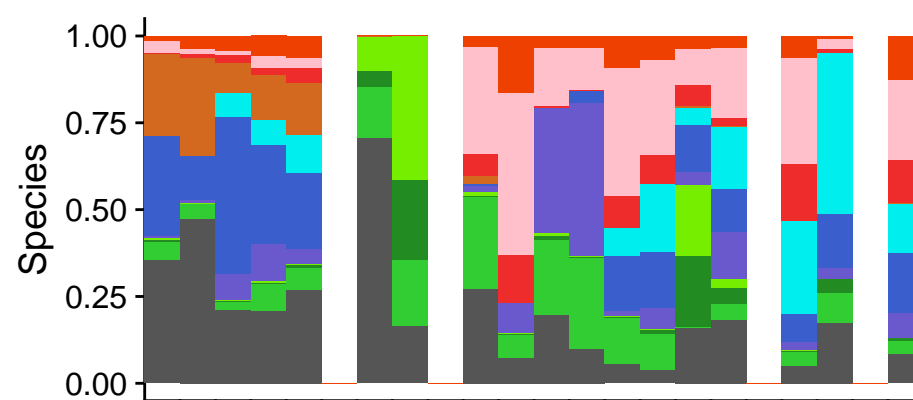

*Bacteroides caccae*  
*Bacteroides fragilis*  
*Bacteroides thetaiotaomicron*  
*Bacteroides vulgatus*  
*Eubacterium rectale*  
*Faecalibacterium prausnitzii*  
*Roseburia intestinalis*  
*Escherichia coli*  
*Haemophilus parainfluenzae*  
*Sutterella wadsworthensis*  
other

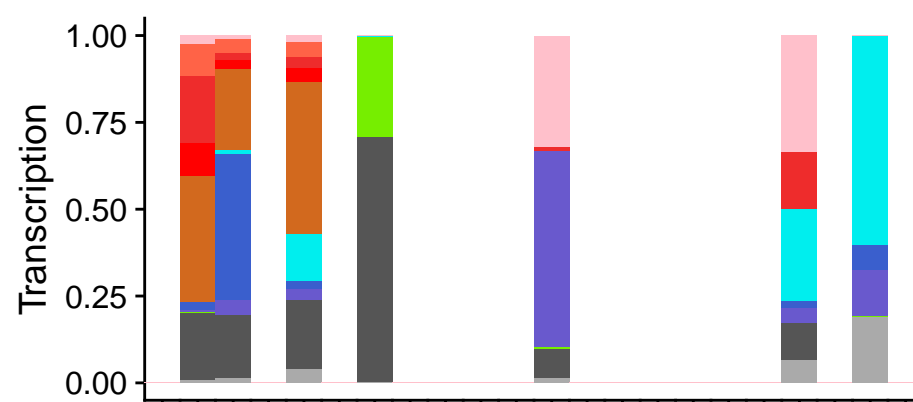

*Bacteroides fragilis*  
*Bacteroides ovatus*  
*Bacteroides thetaiotaomicron*  
*Bacteroides uniformis*  
*Bacteroides vulgatus*  
*Eubacterium rectale*  
*Faecalibacterium prausnitzii*  
*Roseburia intestinalis*  
*Escherichia coli*  
other  
unclassified

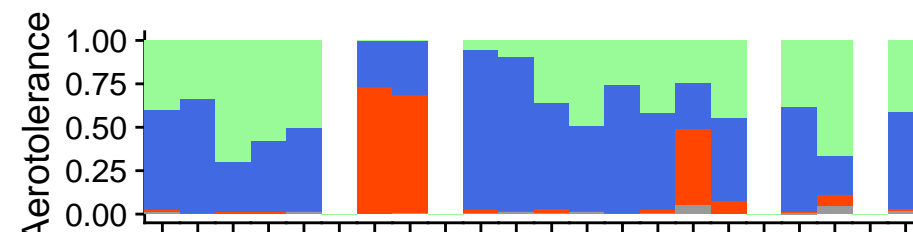

obligate anaerobe  
aerotolerant  
facultative anaerobe  
unknown

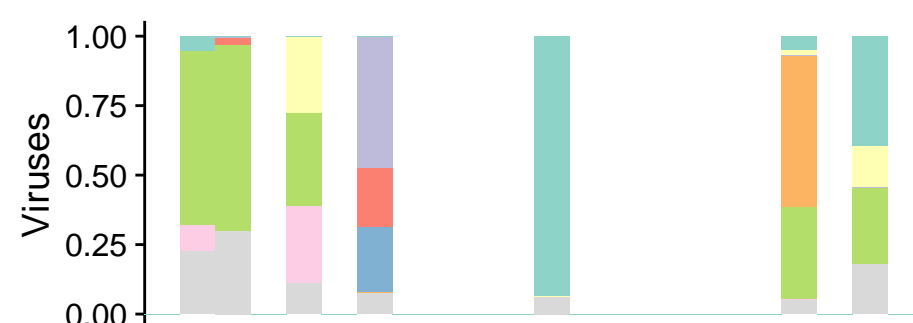

*Escherichia virus K1G*  
*Escherichia virus K1ind2*  
Gyrovirus 4  
Gyrovirus GyV3  
Gokushovirus WZ-2015a  
Norovirus GII isolates  
Pepper mild mottle virus  
Tomato mosaic virus  
other

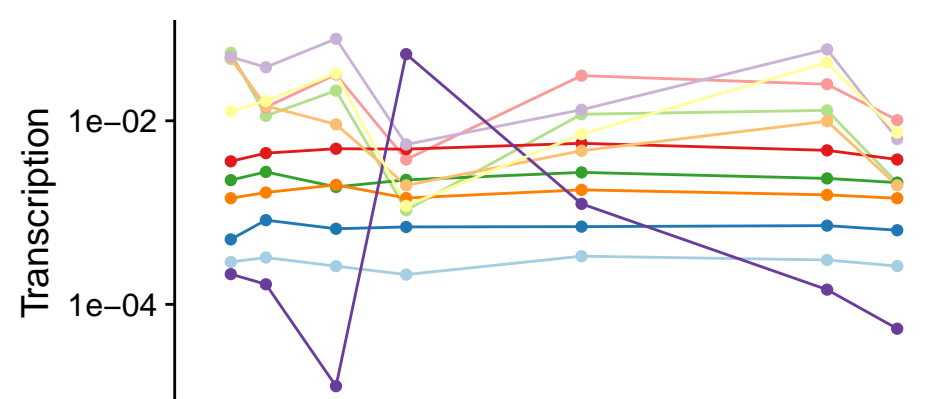

K01736: chorismate synthase [EC:4.2.3.5]  
K01951: GMP synthase (glutamine-hydrolysi...  
K02078: acyl carrier protein  
K02356: elongation factor EF-P  
K02968: small subunit ribosomal protein S20  
K03040: DNA-directed RNA polymerase sub...  
K03088: RNA polymerase sigma-70 factor, E...  
K03545: trigger factor  
K04078: chaperonin GroES  
K06078: murein lipoprotein lipoprotein  
K13993: HSP20 family protein

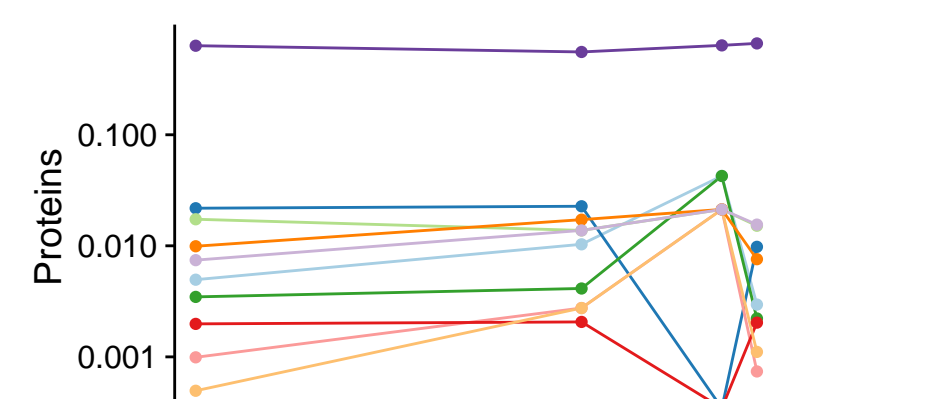

K00134: glyceraldehyde 3-phosphate dehydr...  
K00262: glutamate dehydrogenase (NADP+) ...  
K02358: elongation factor EF-Tu  
K02931: large subunit ribosomal protein L5  
K02950: small subunit ribosomal protein S12  
K02959: small subunit ribosomal protein S16  
K02988: small subunit ribosomal protein S5  
K03737: pyruvate-ferredoxin/flavodoxin oxido...  
K04077: chaperonin GroEL  
UNGROUPED

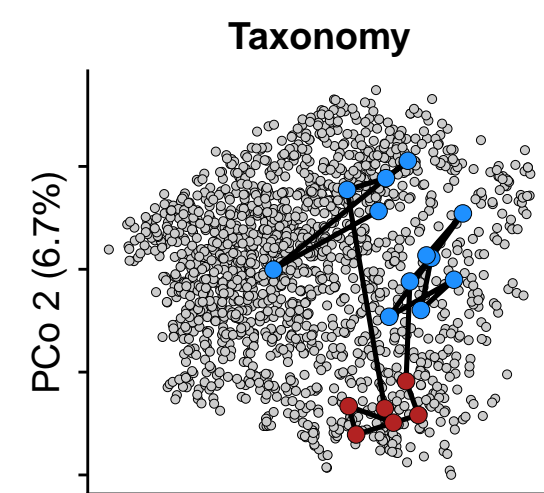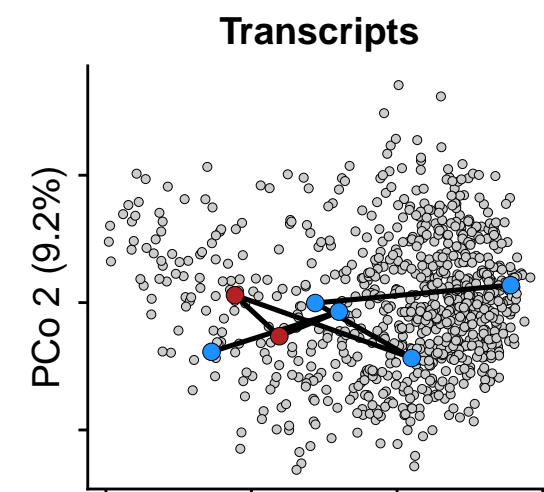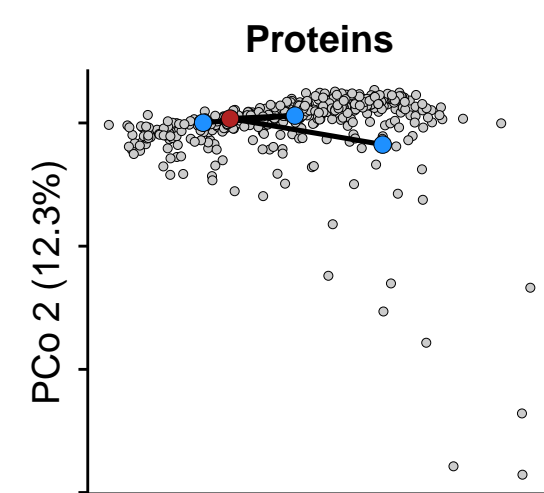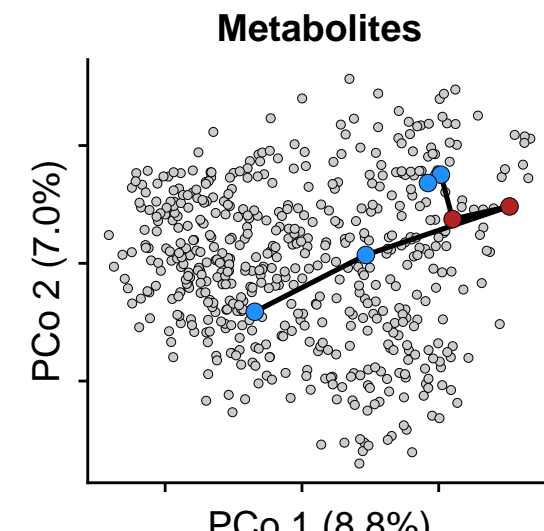

# H4016: 10 Female White Cincinnati | nonIBD

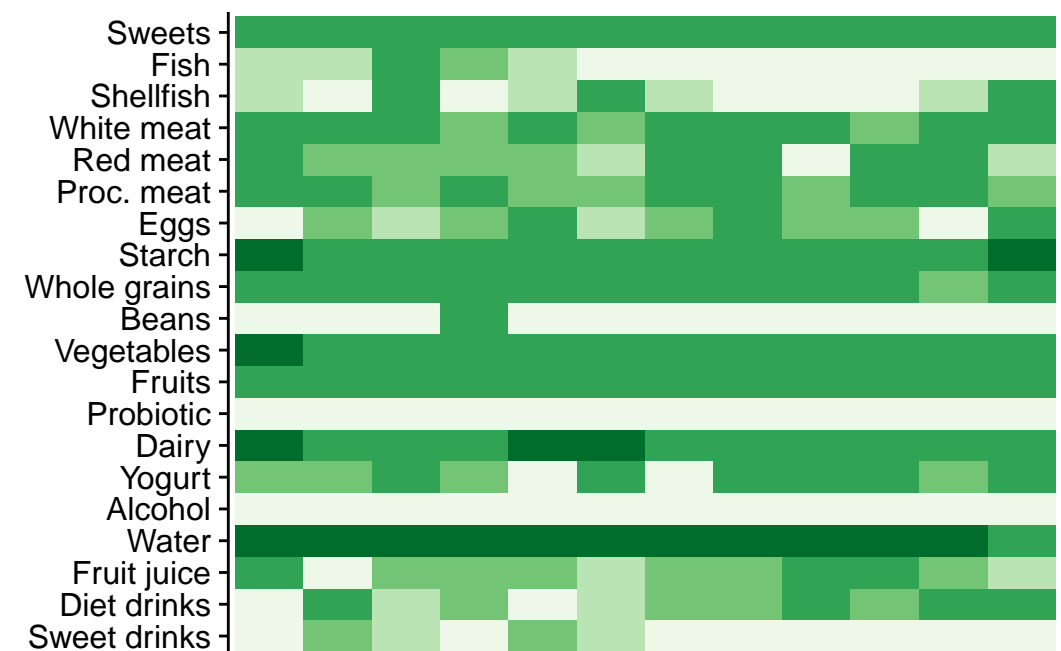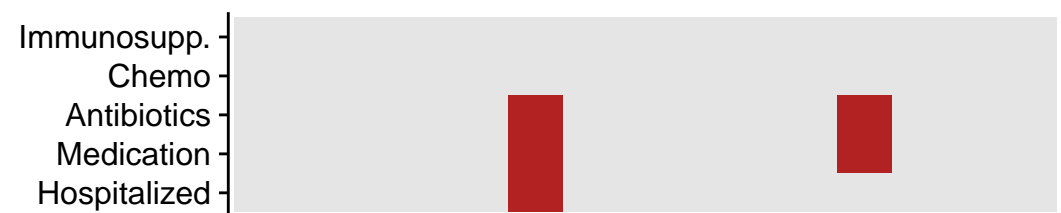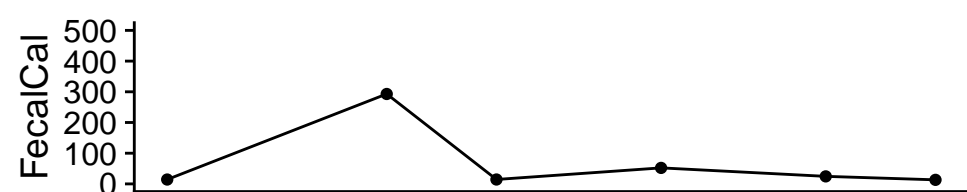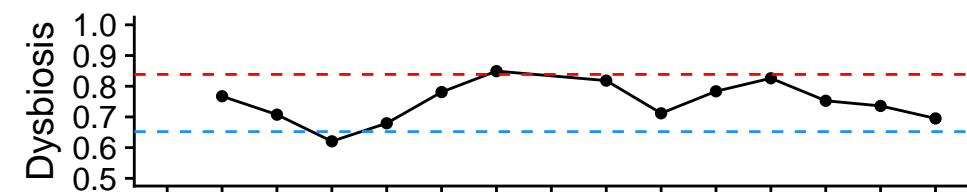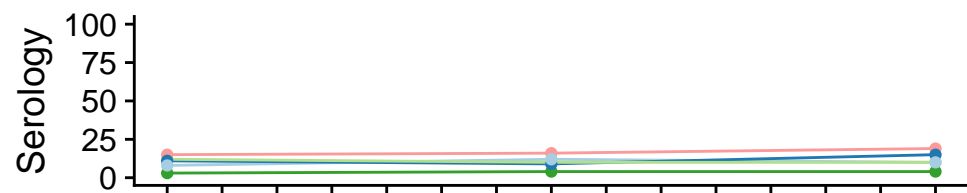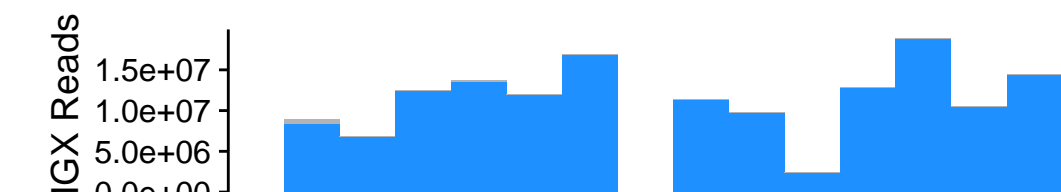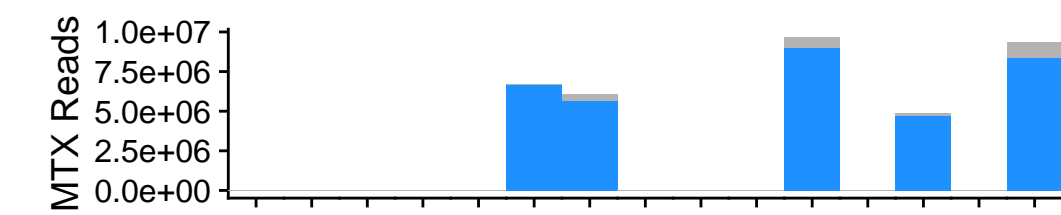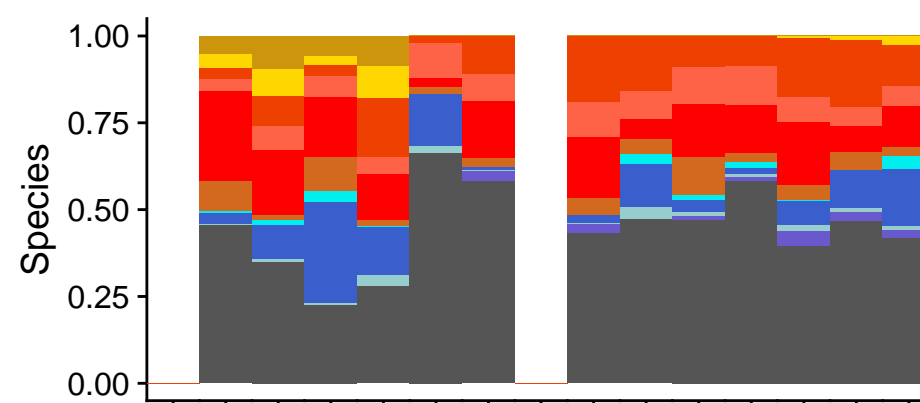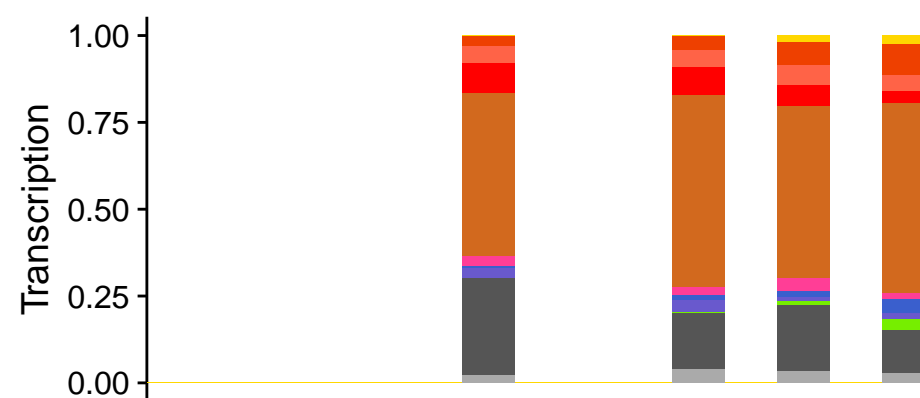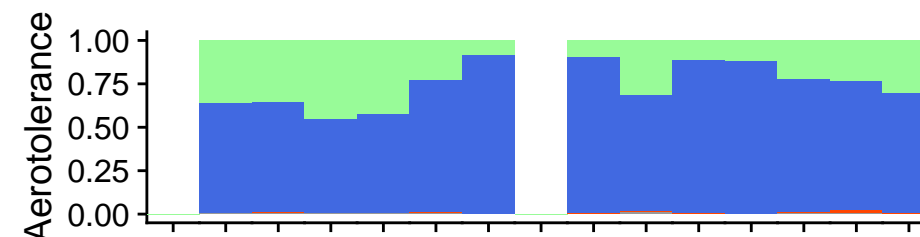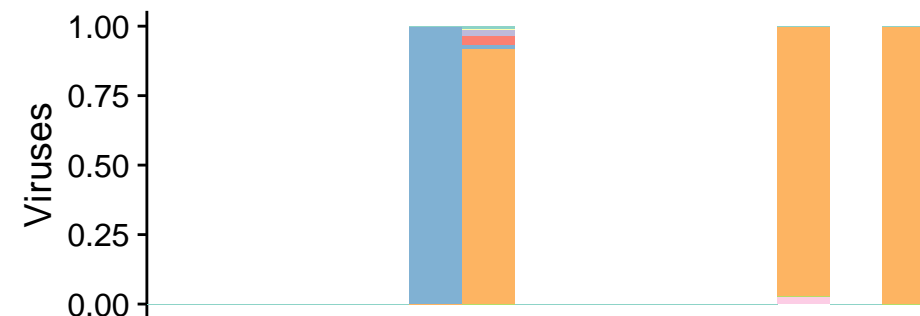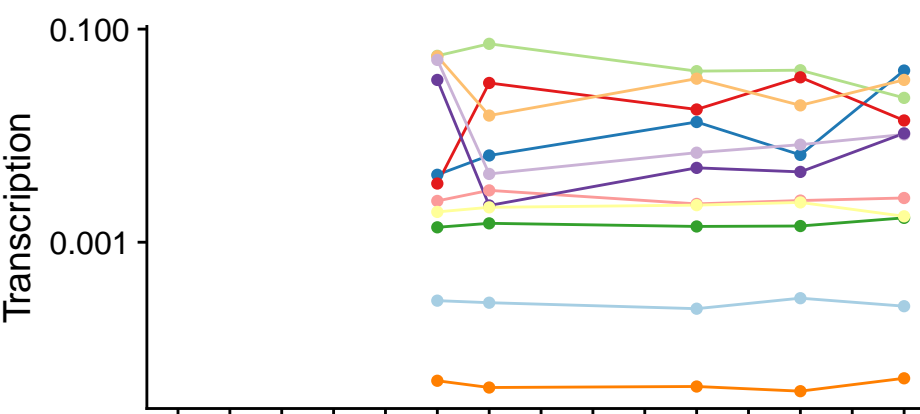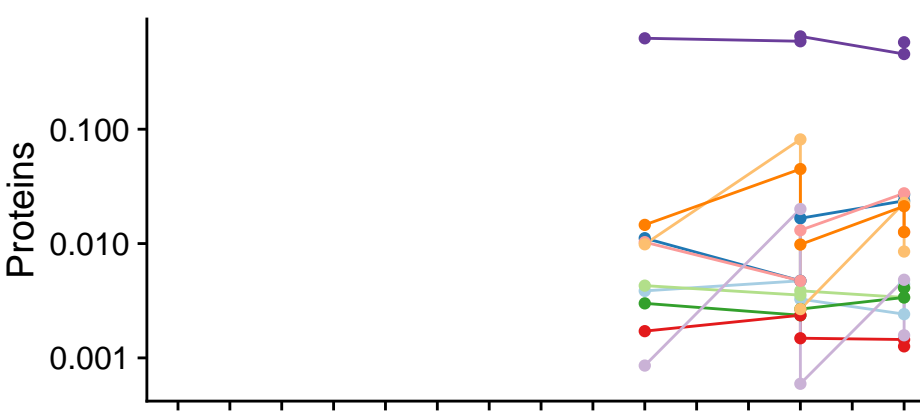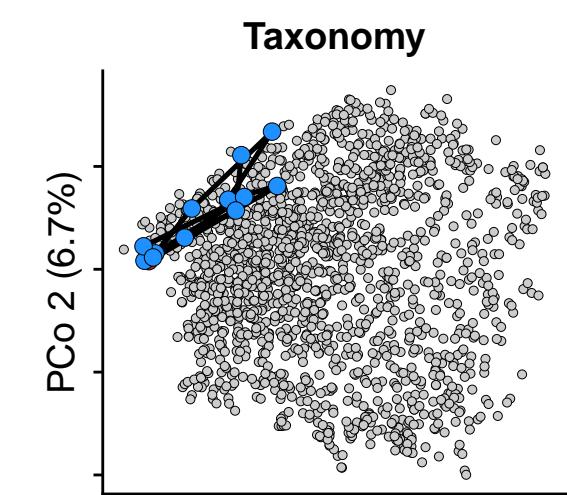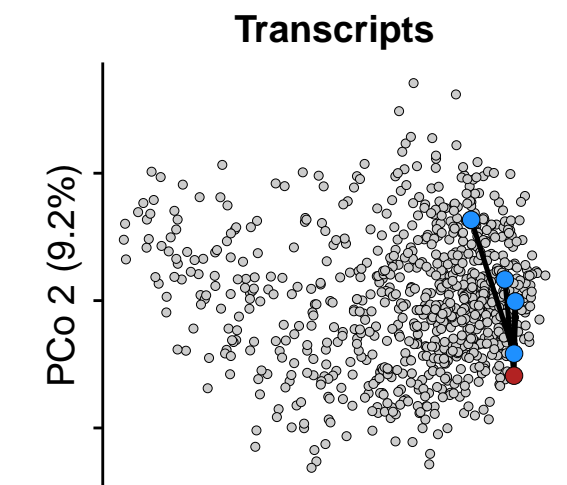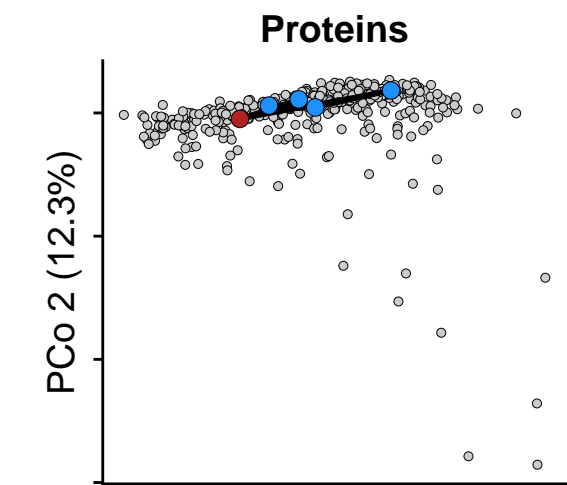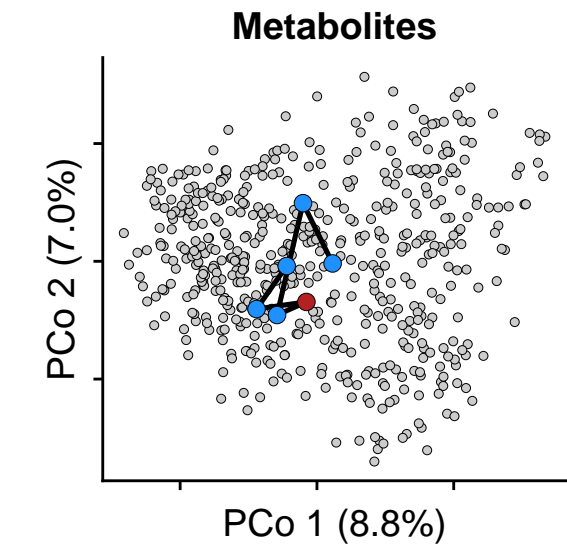

# H4017: 16 Female White Cincinnati | CD L3+L4

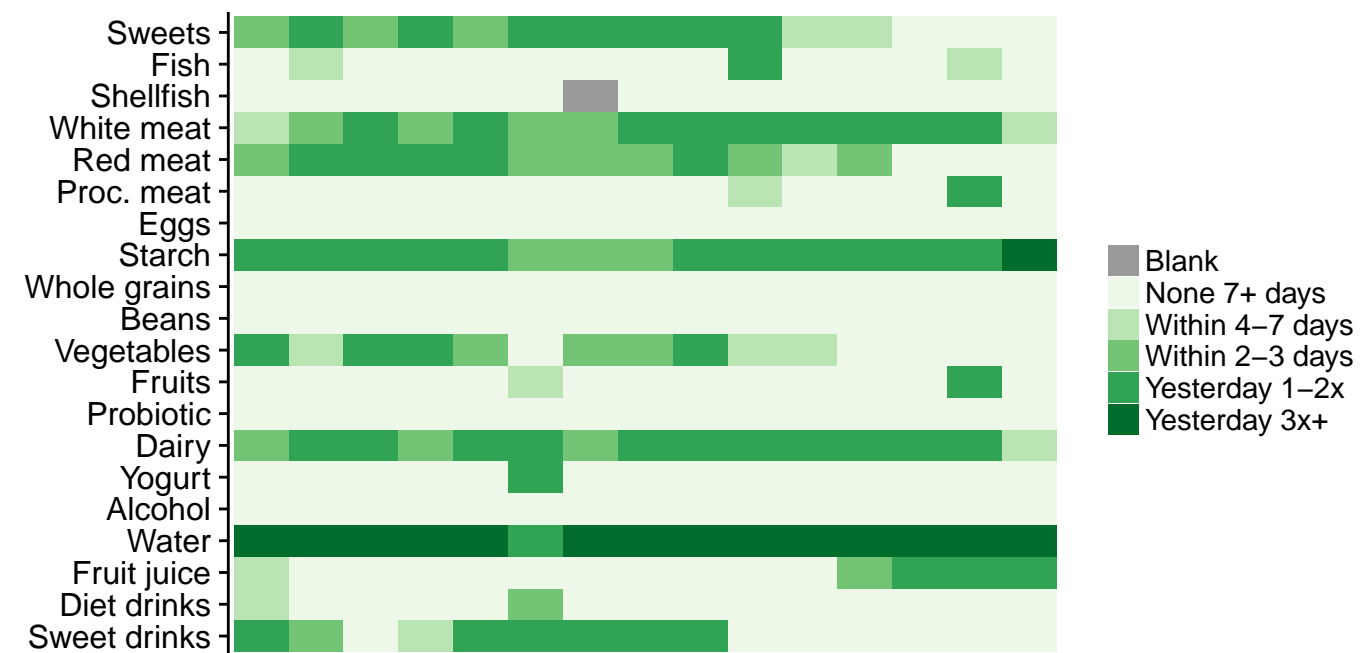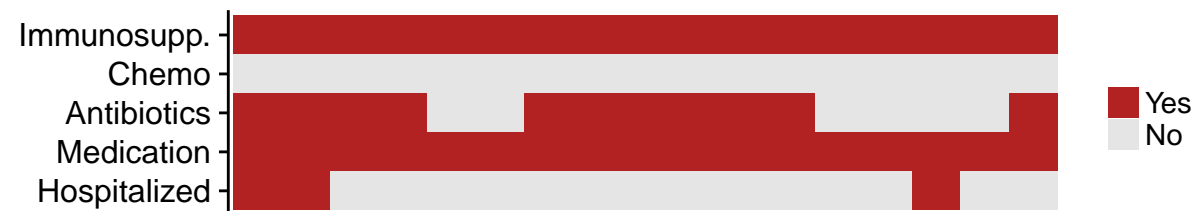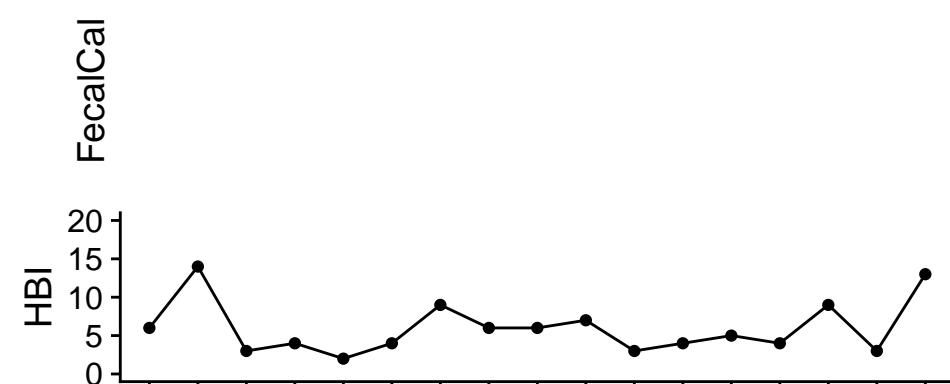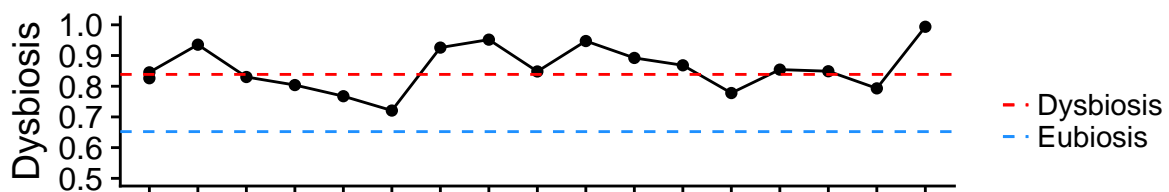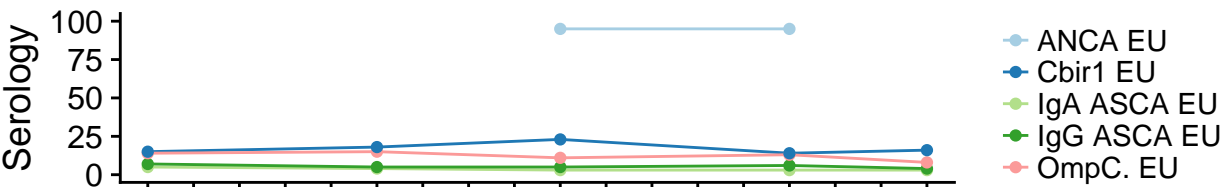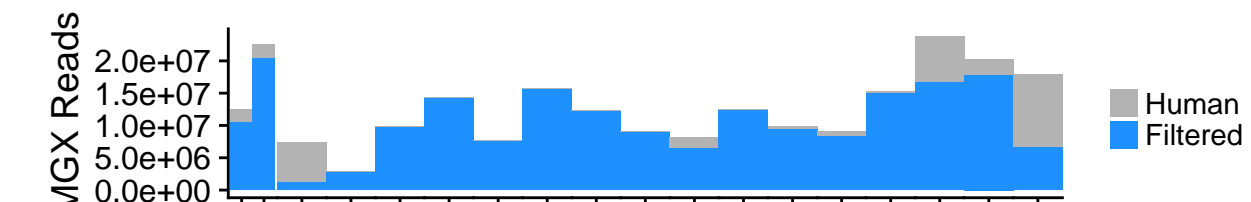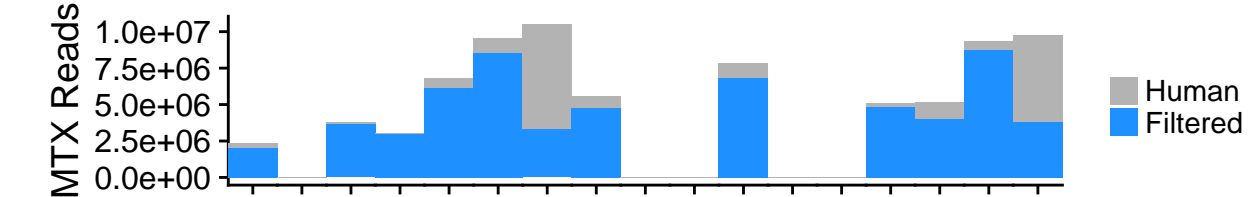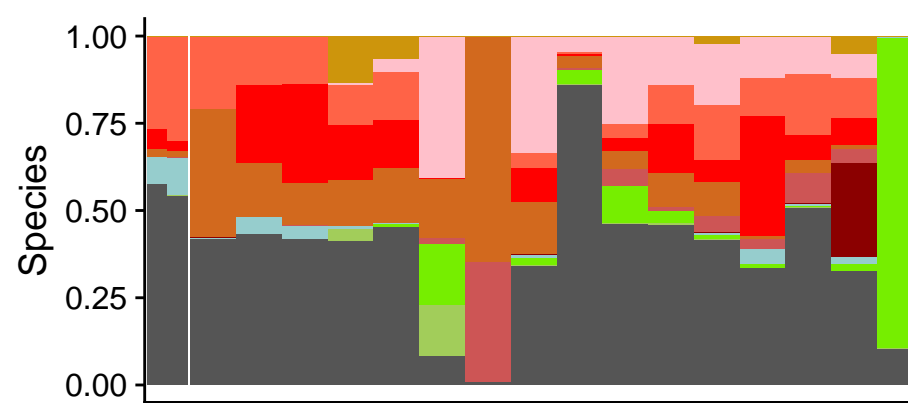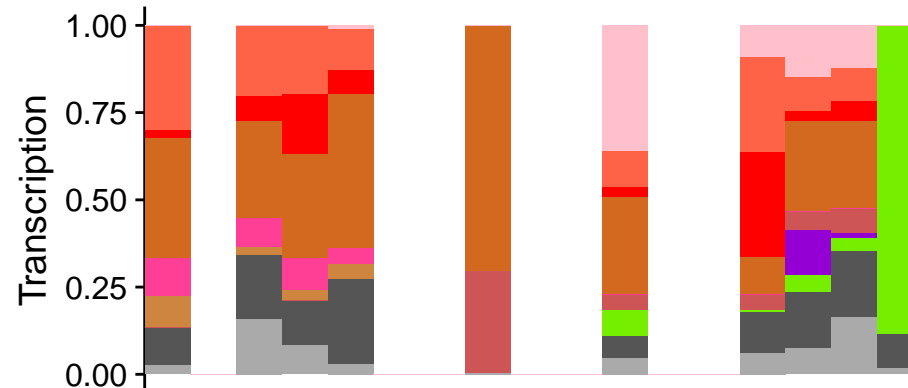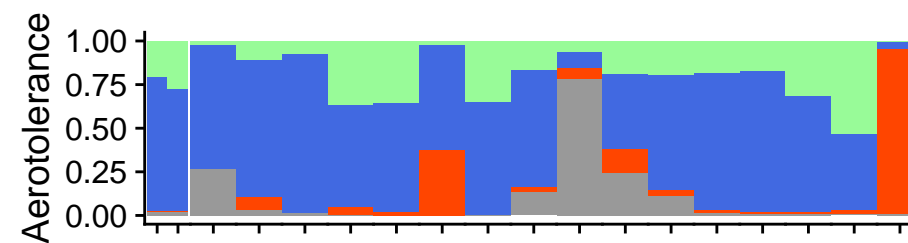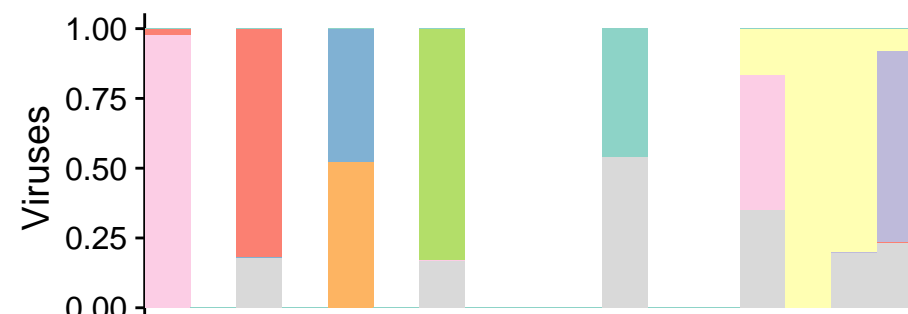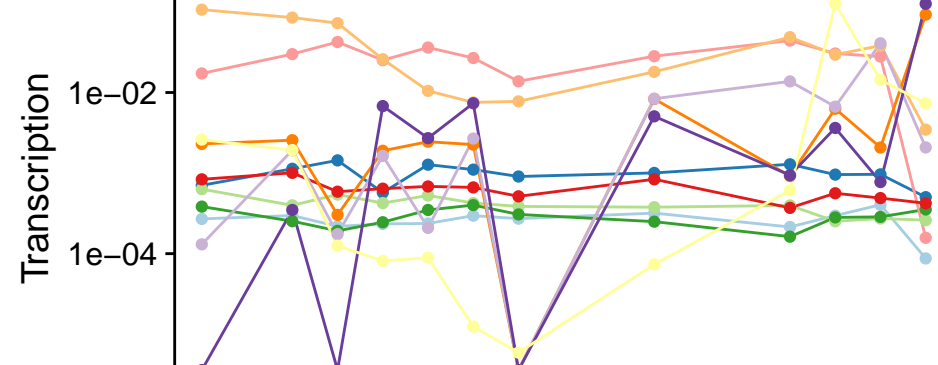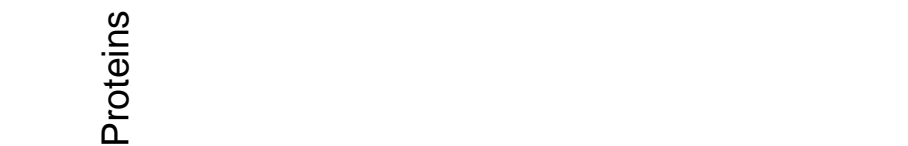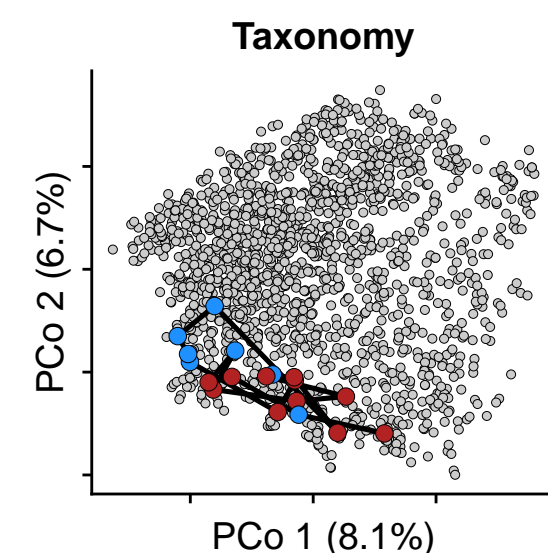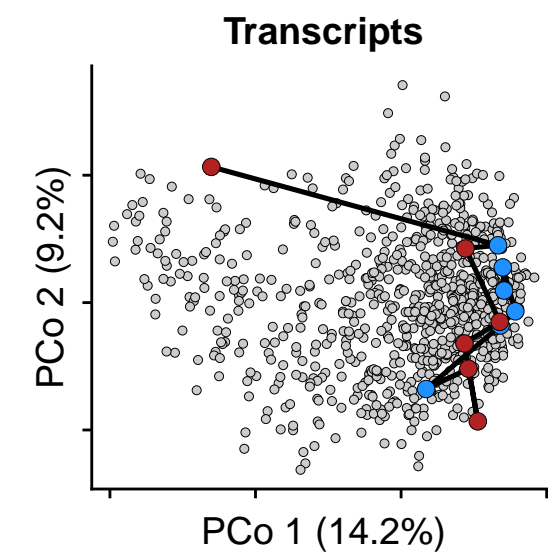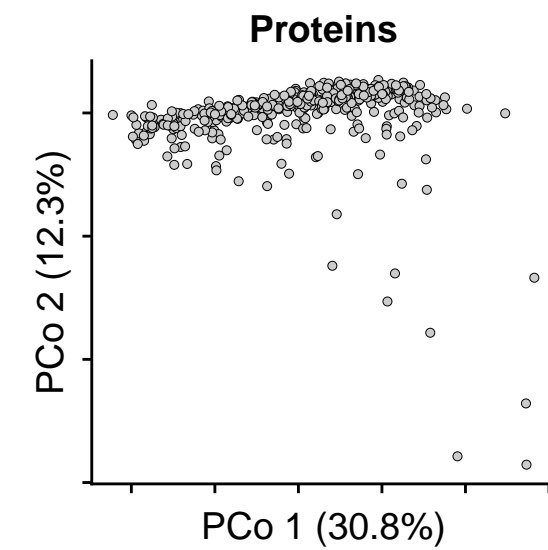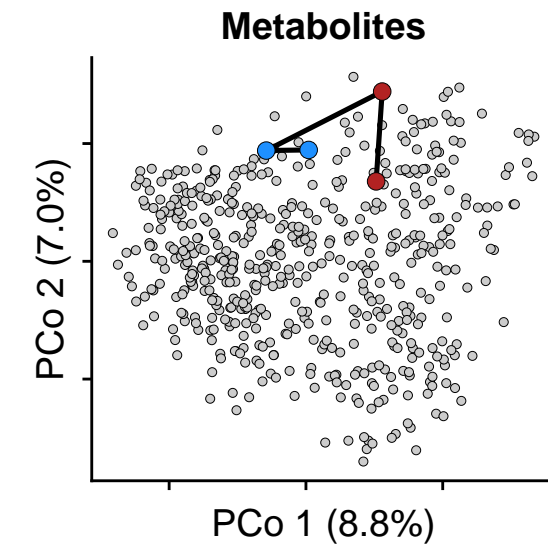



# H4018: 13 Female White Cincinnati | nonIBD

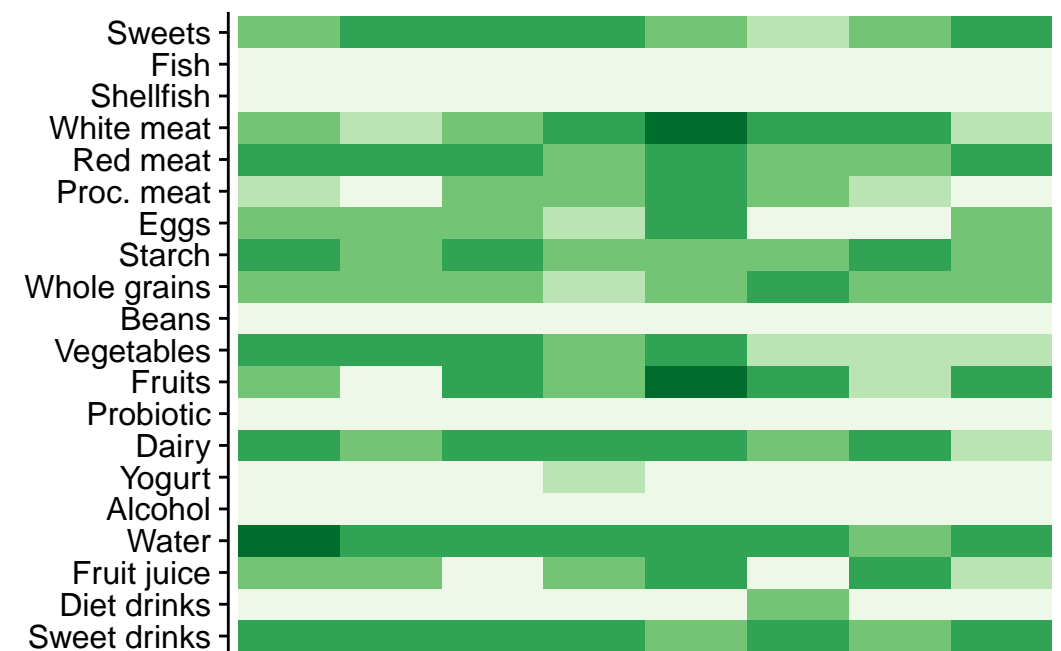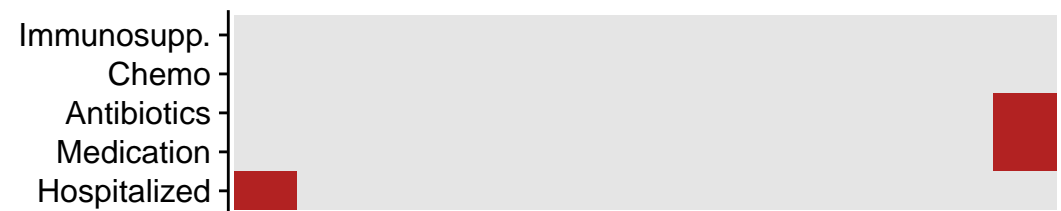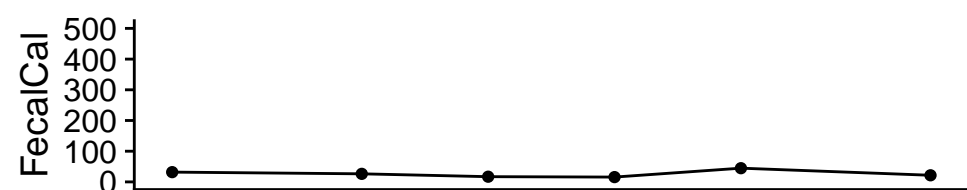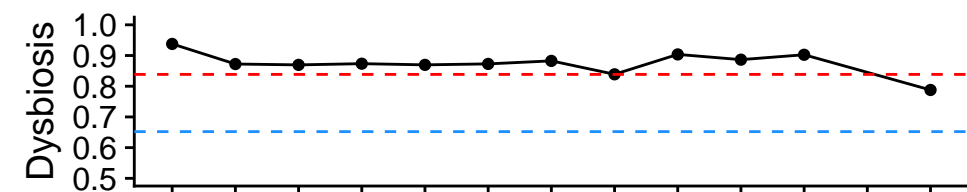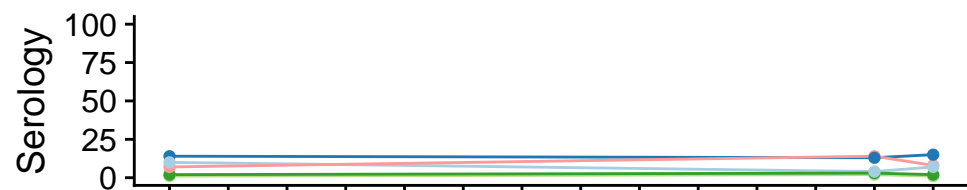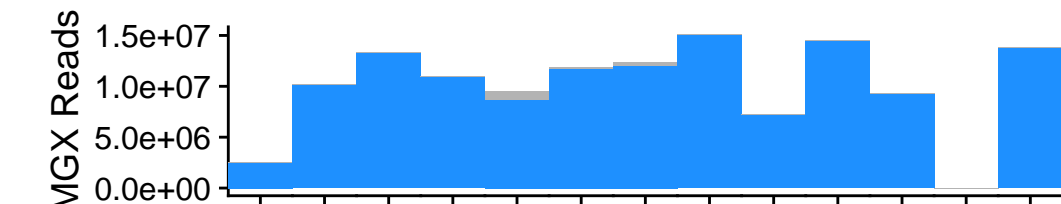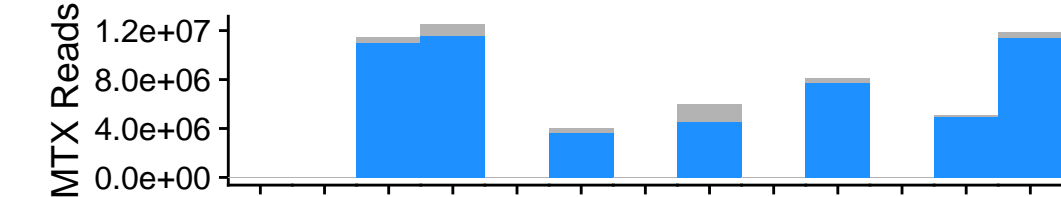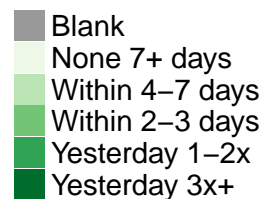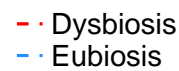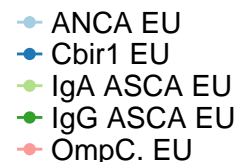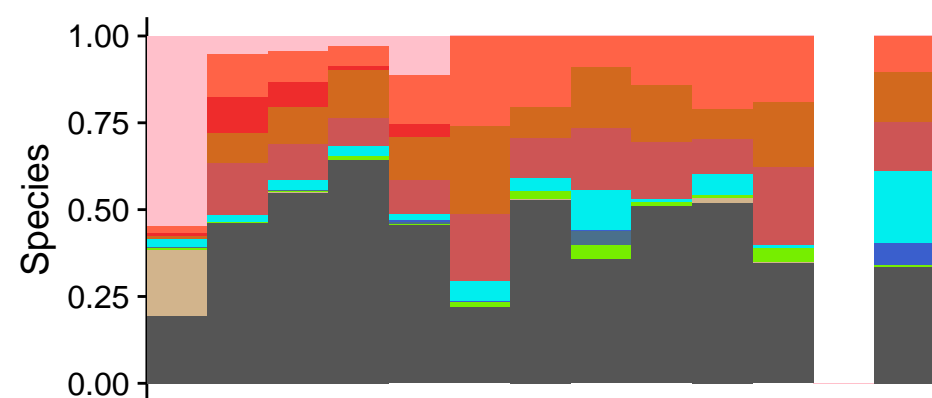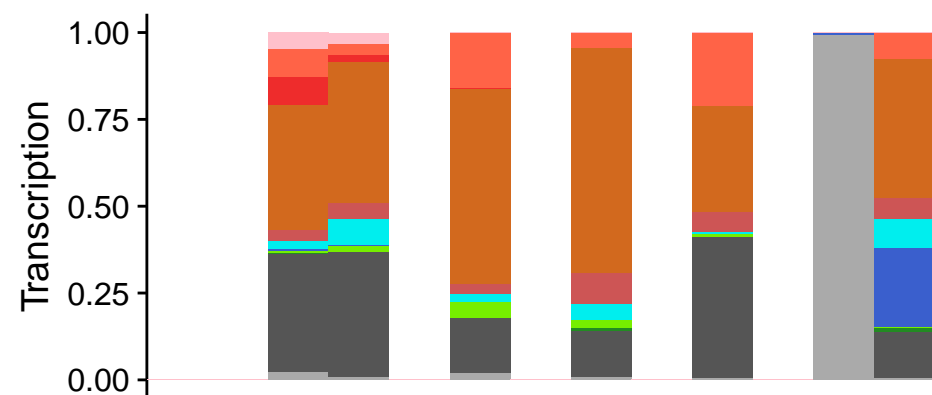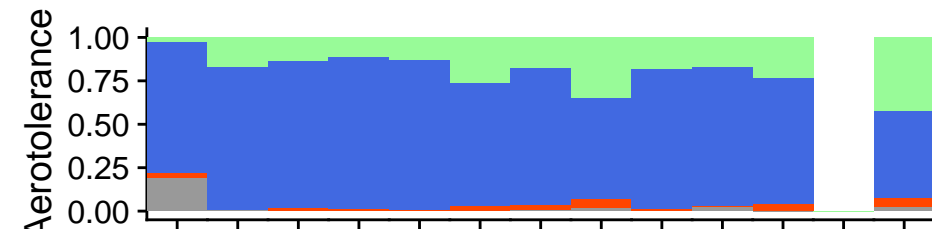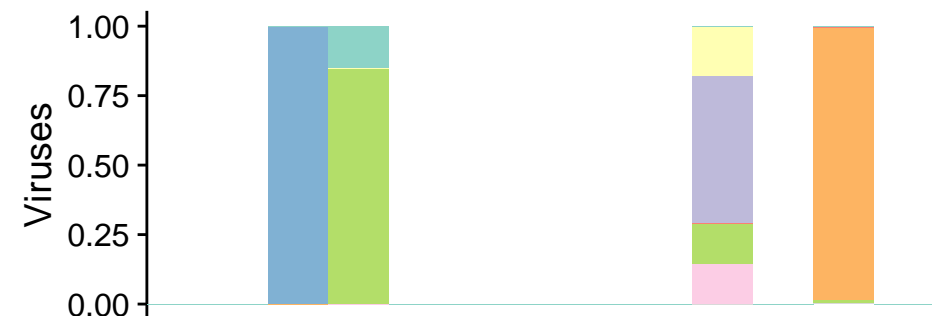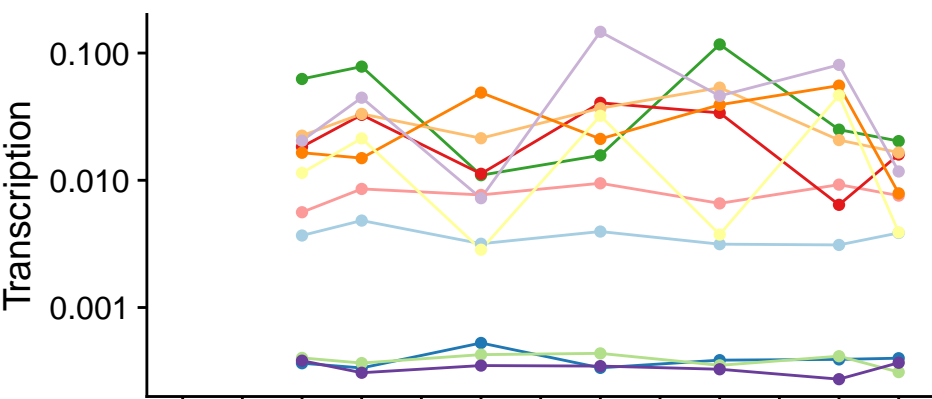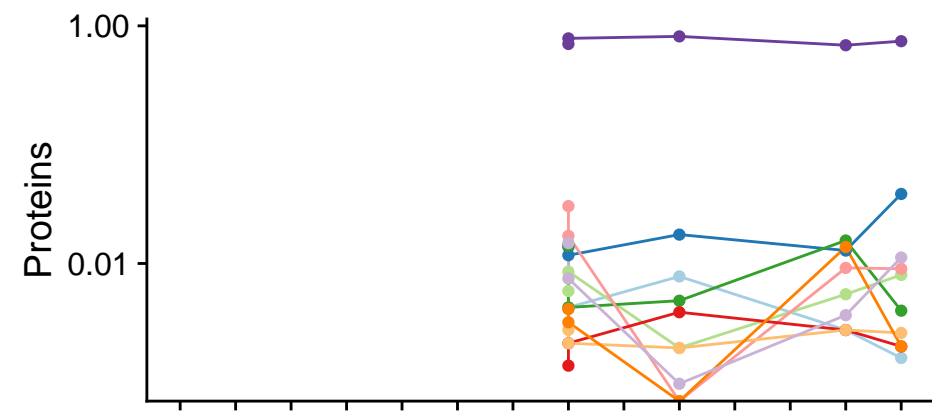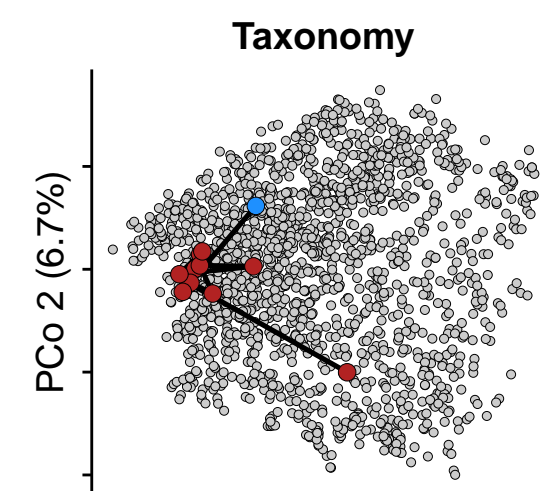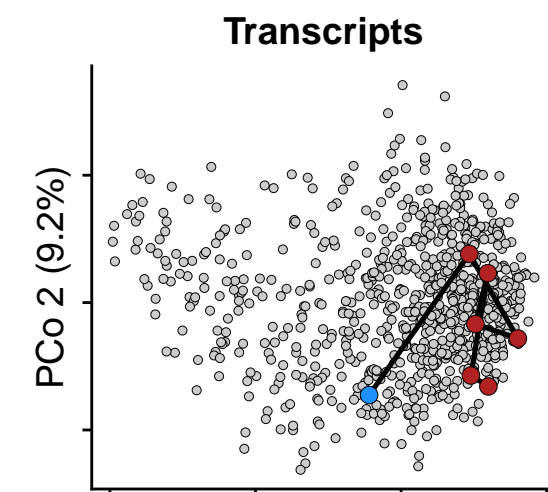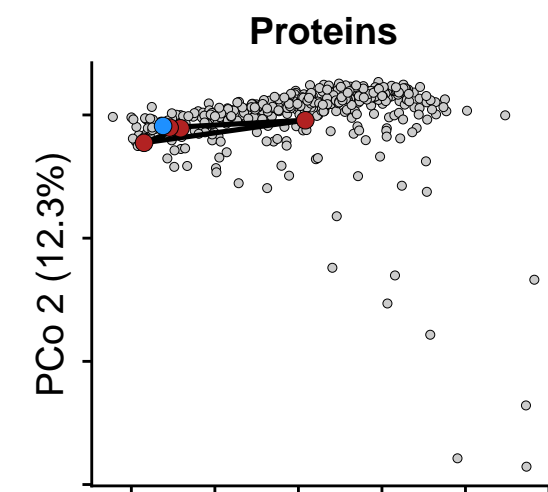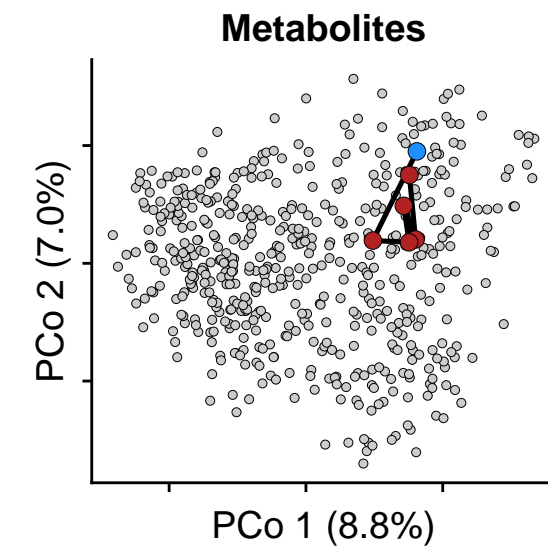

# H4019: 11 Female Black or African American Cincinnati | UC

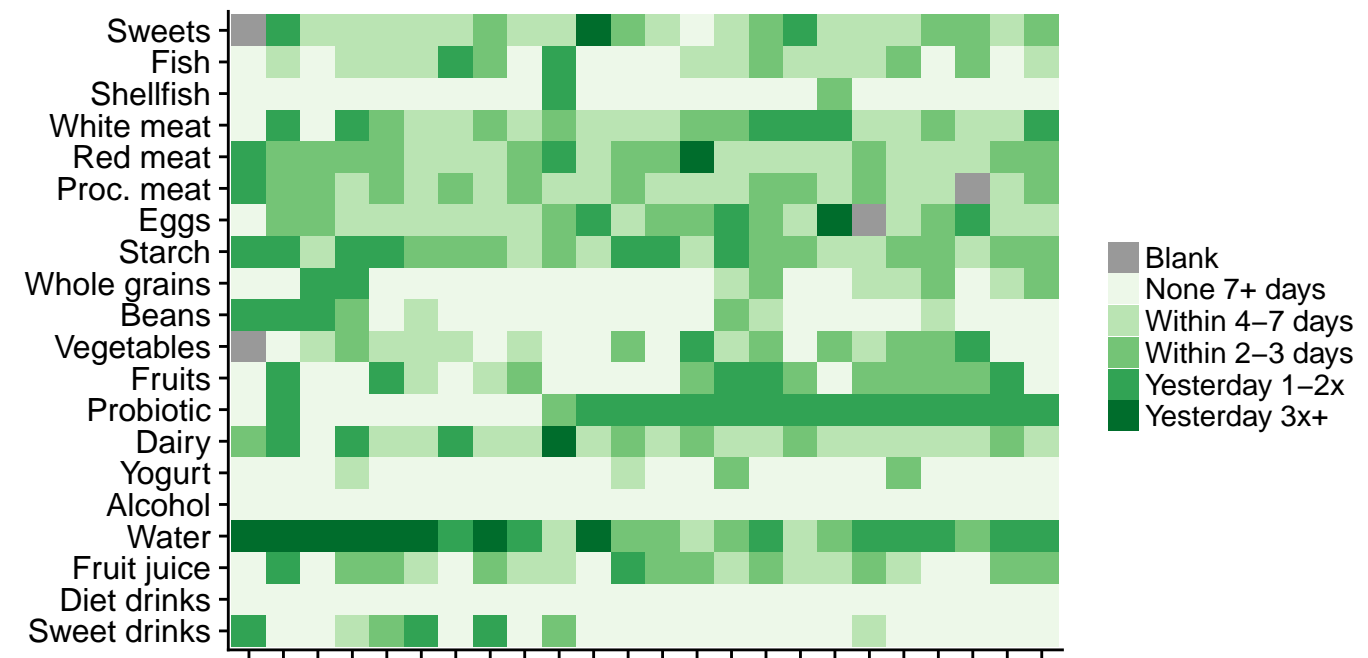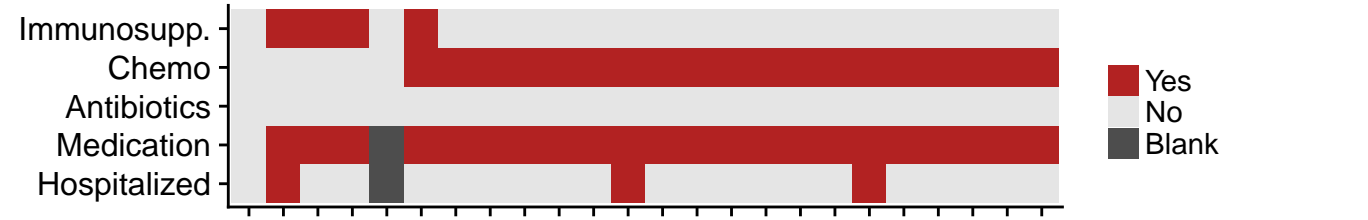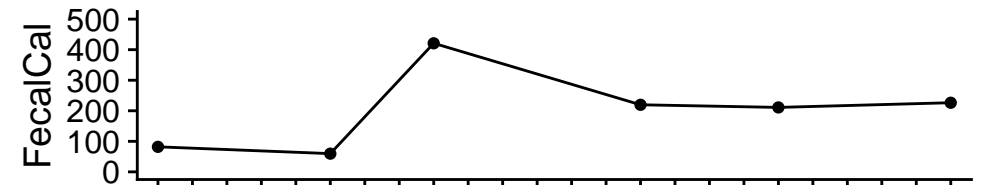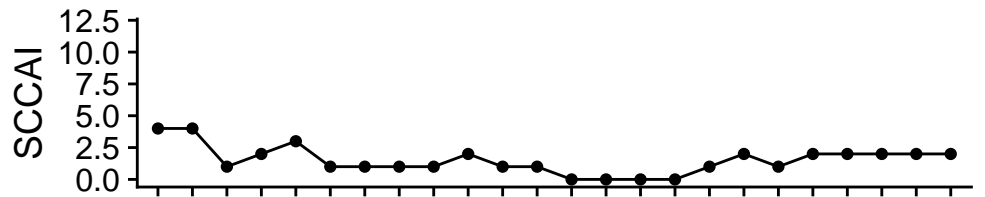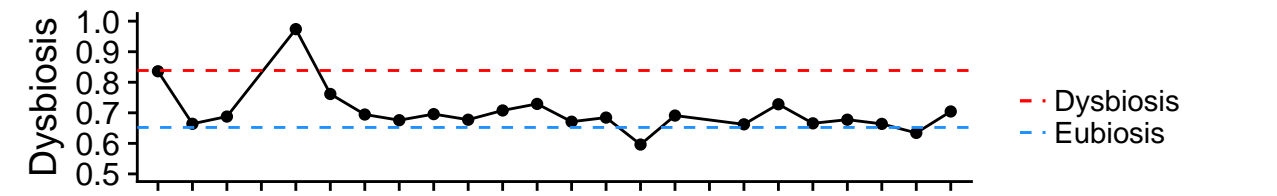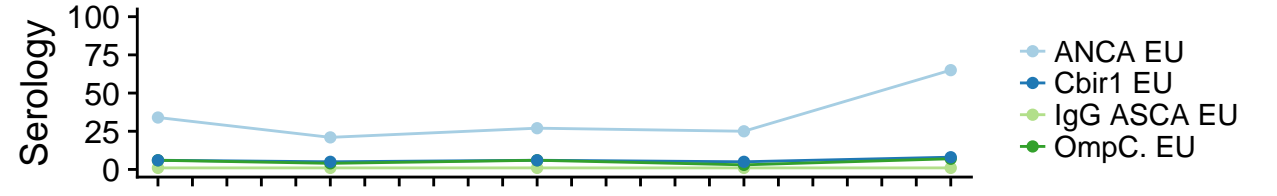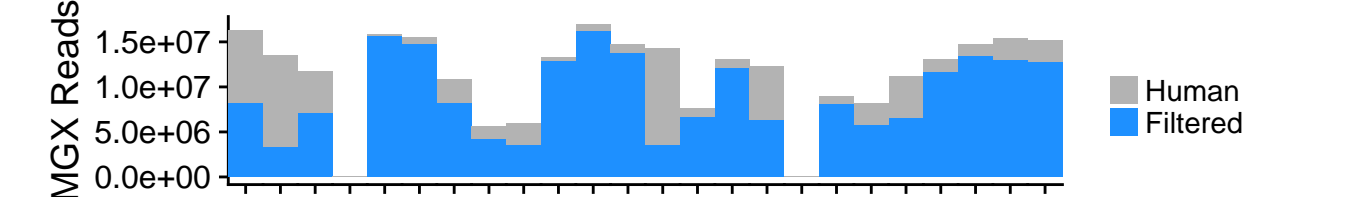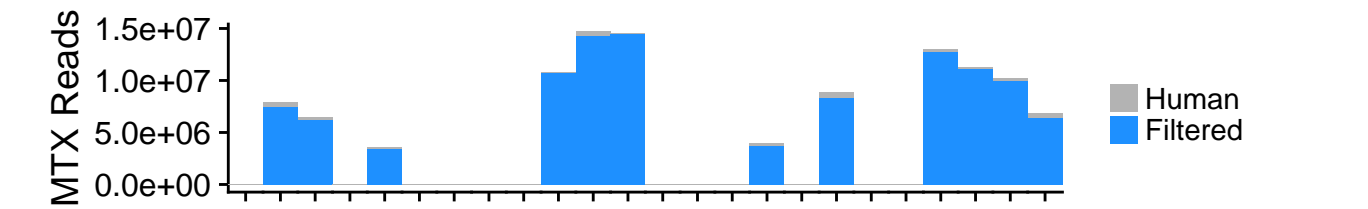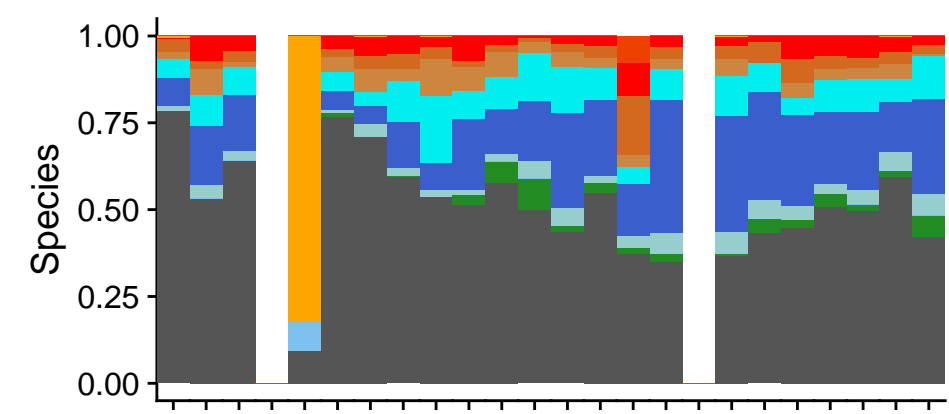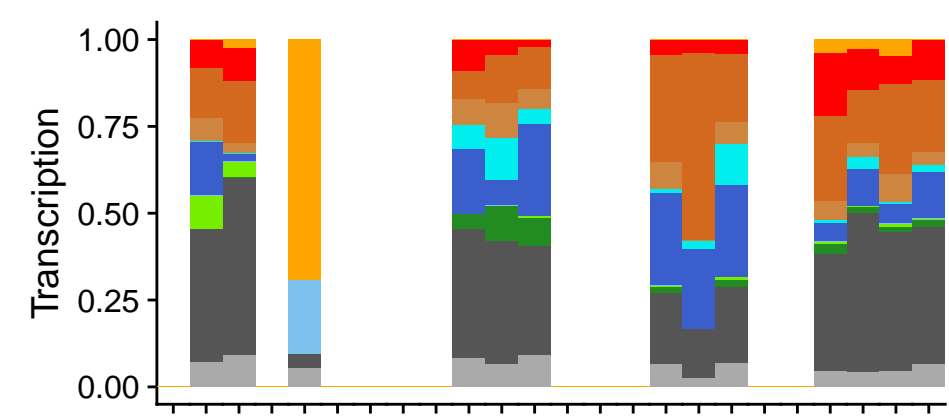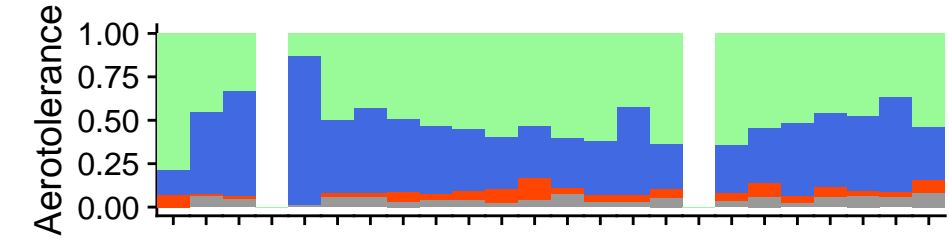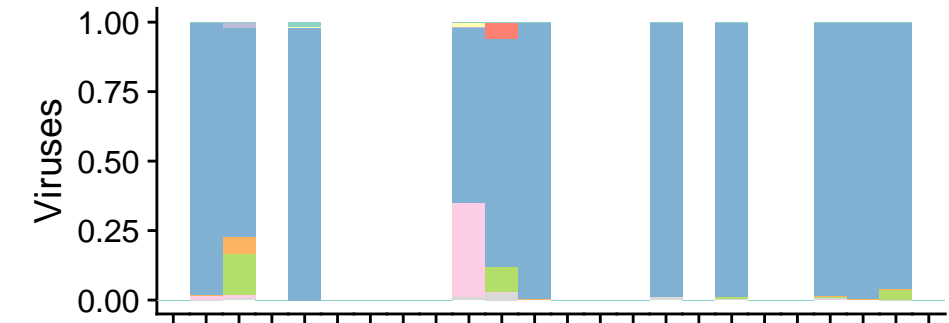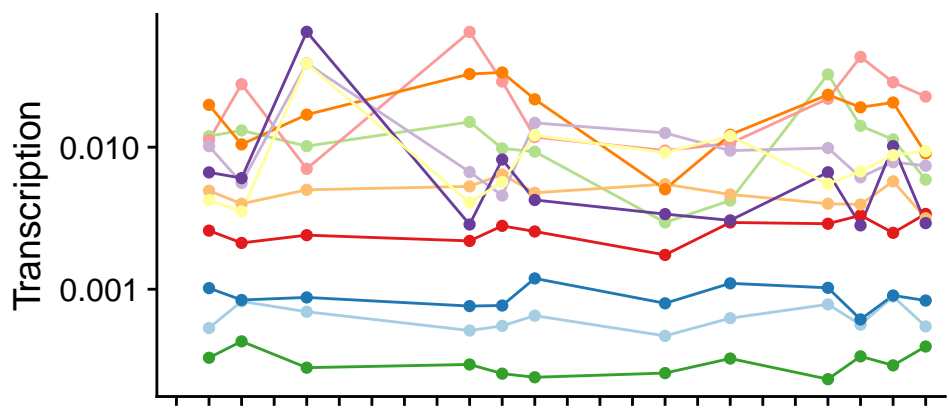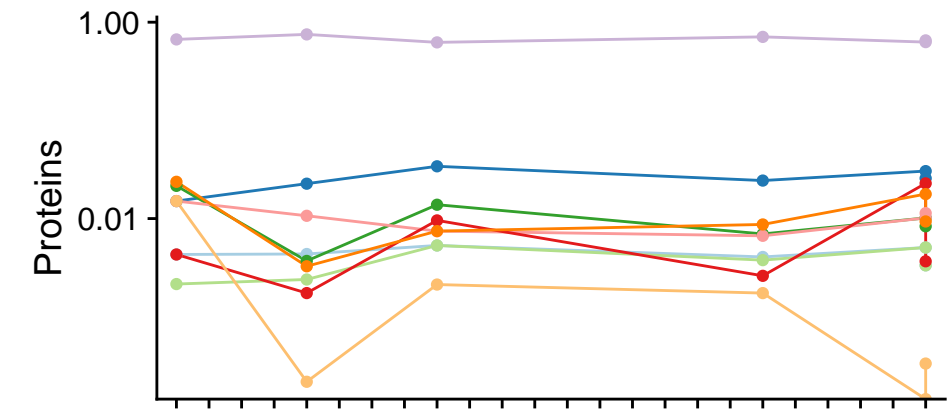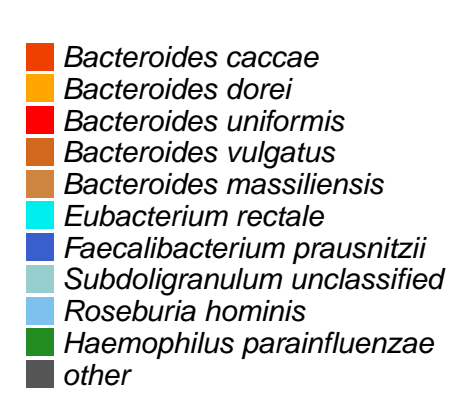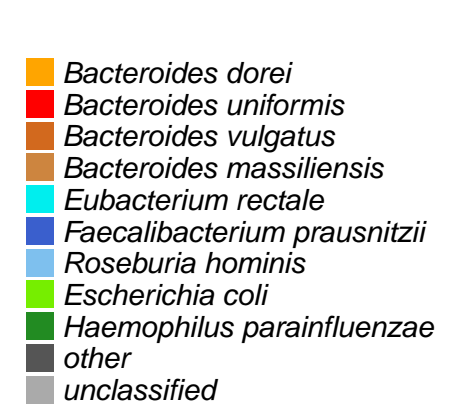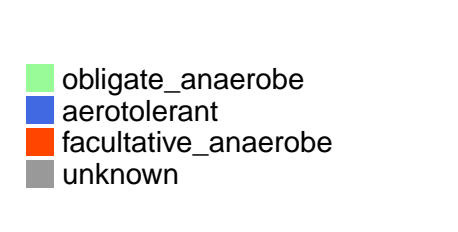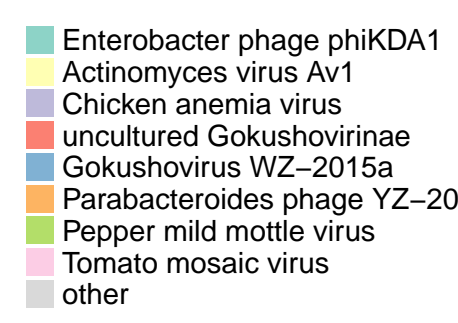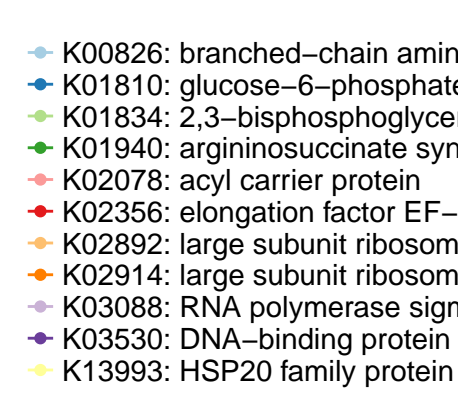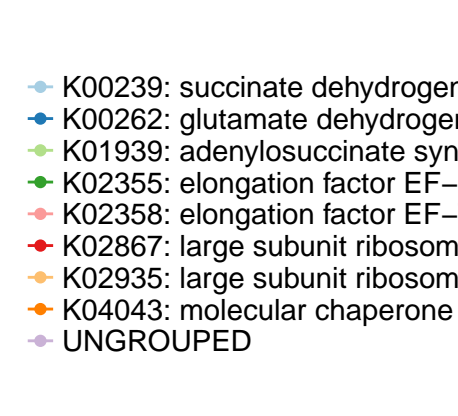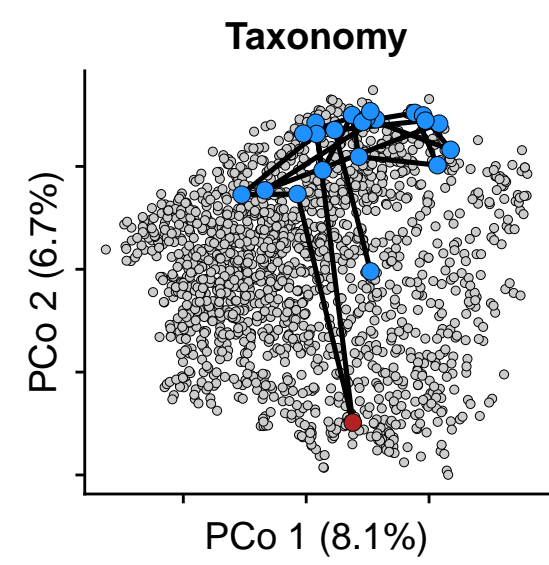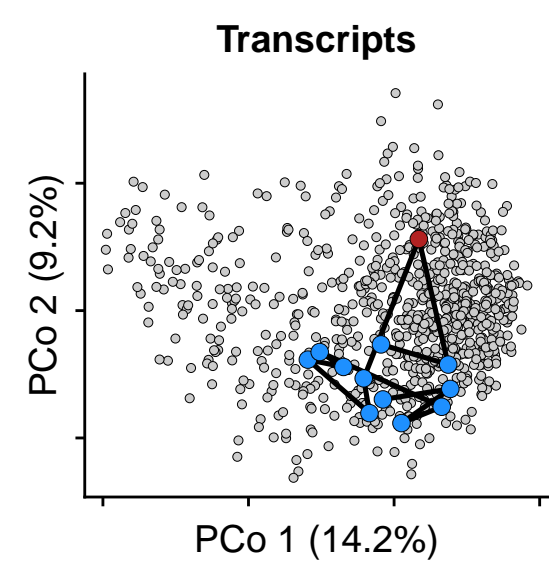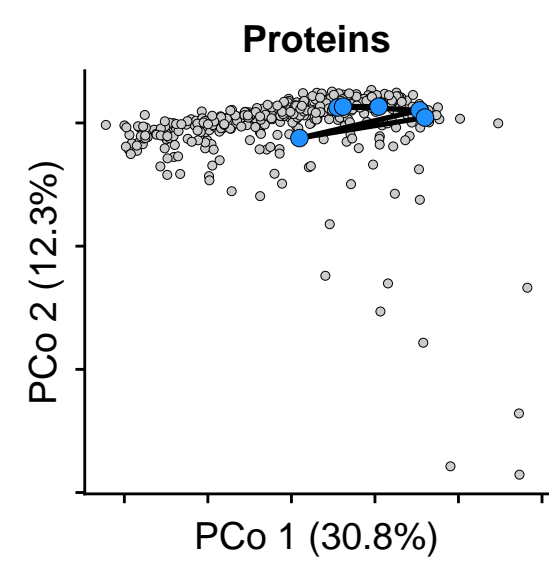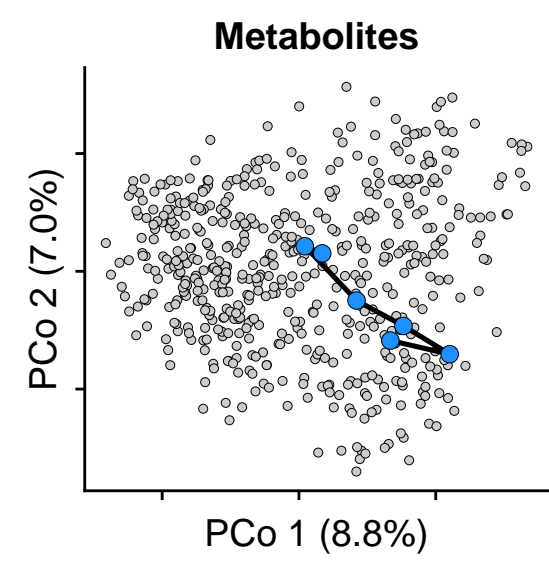

# H4020: 13 Male White Cincinnati | CD L1+L4

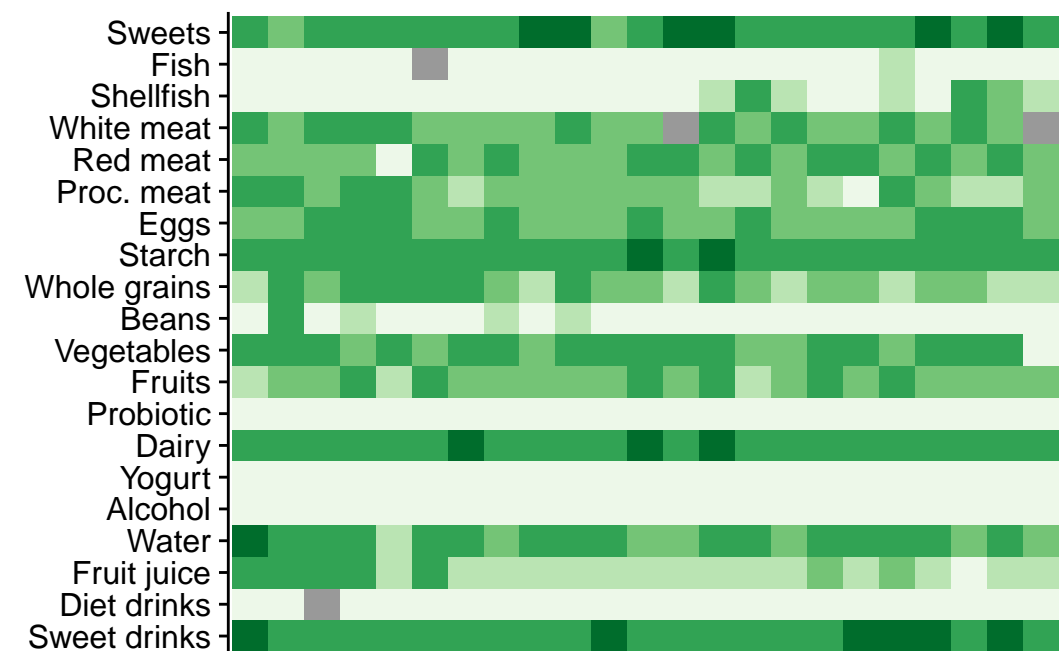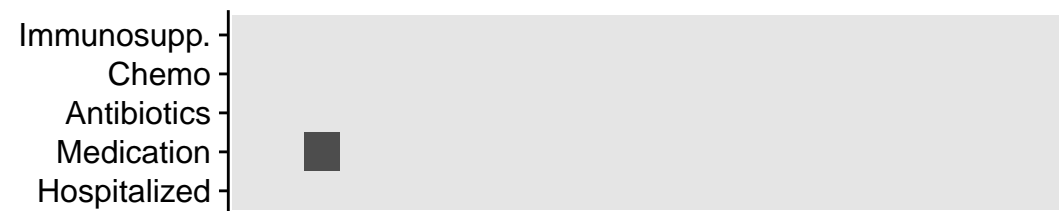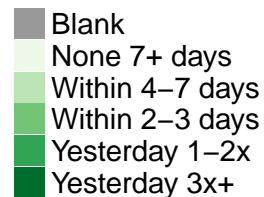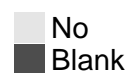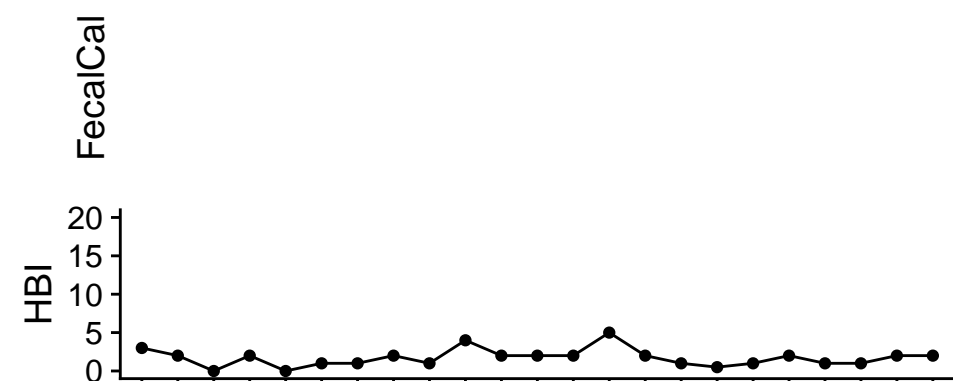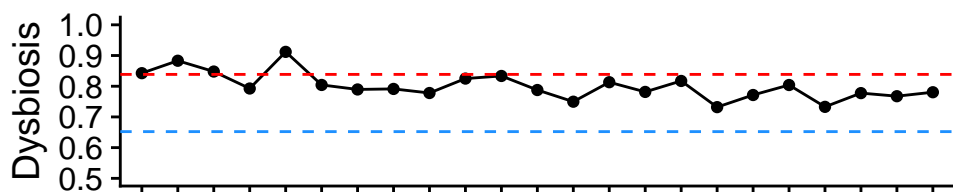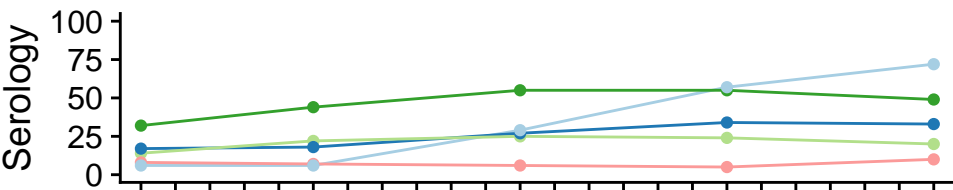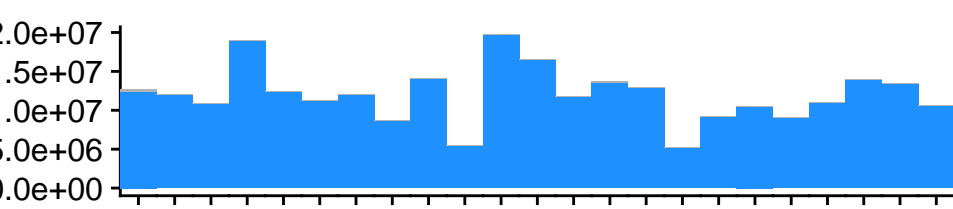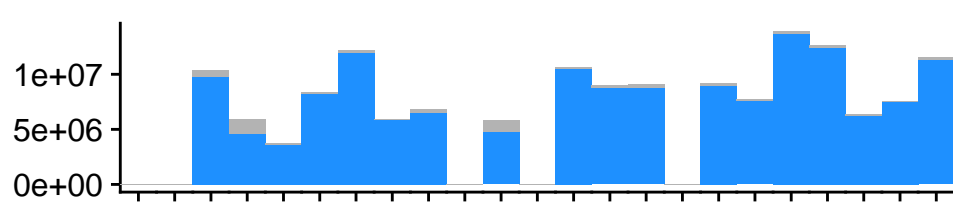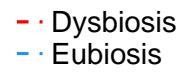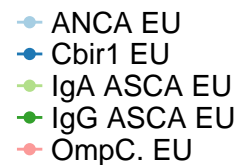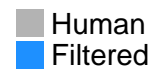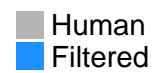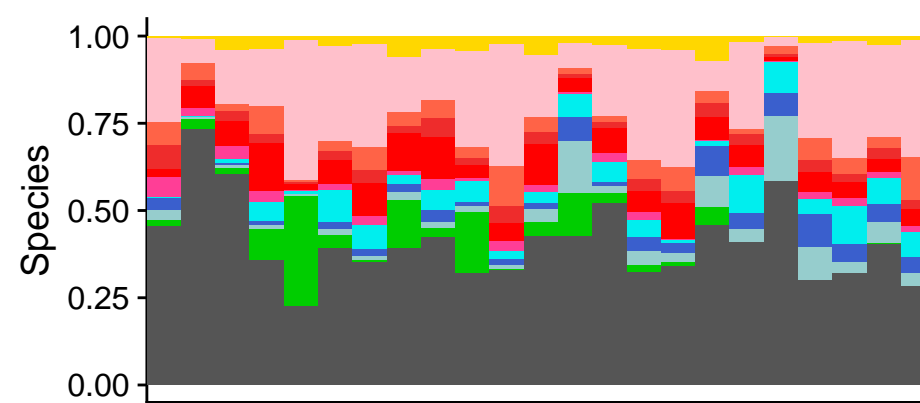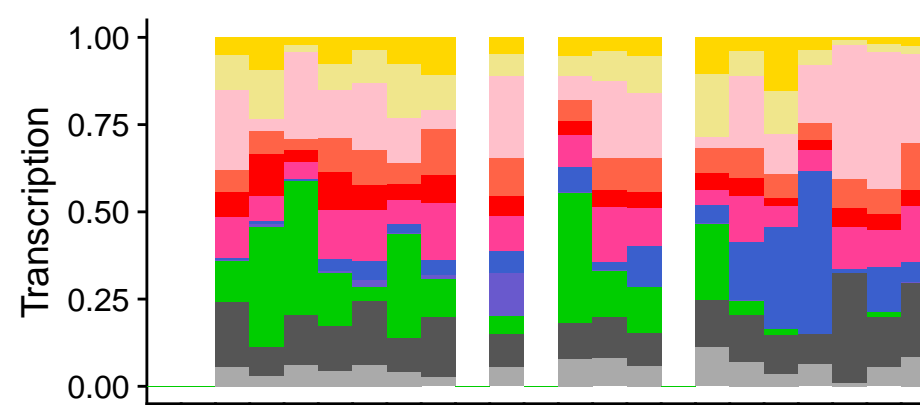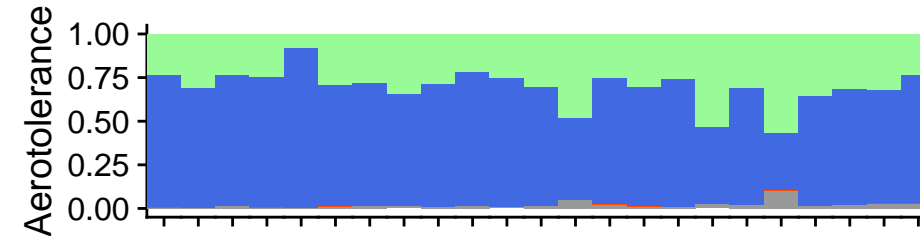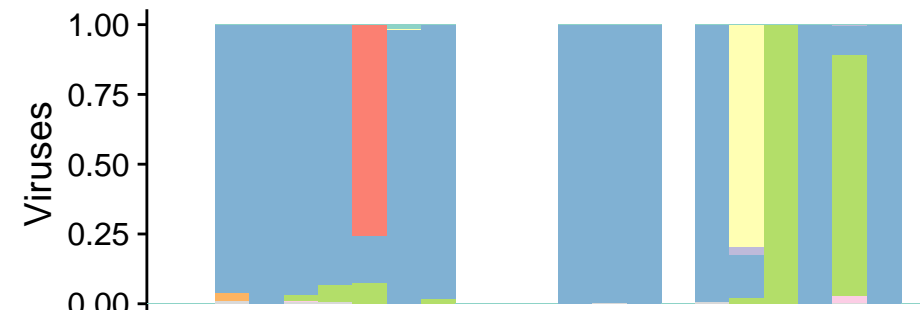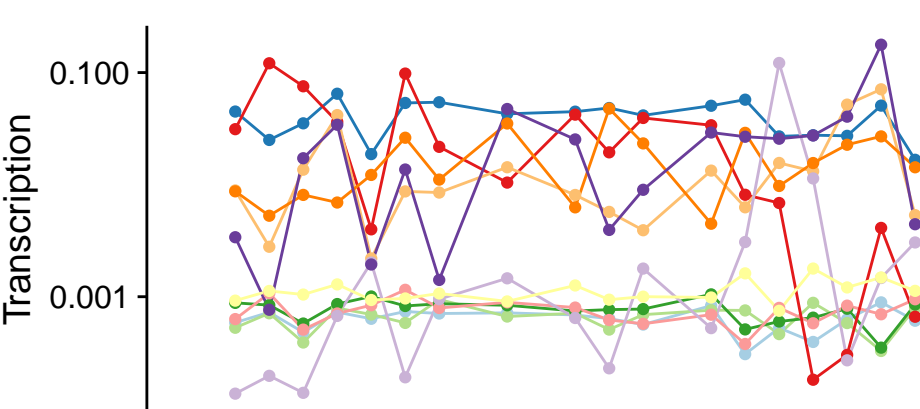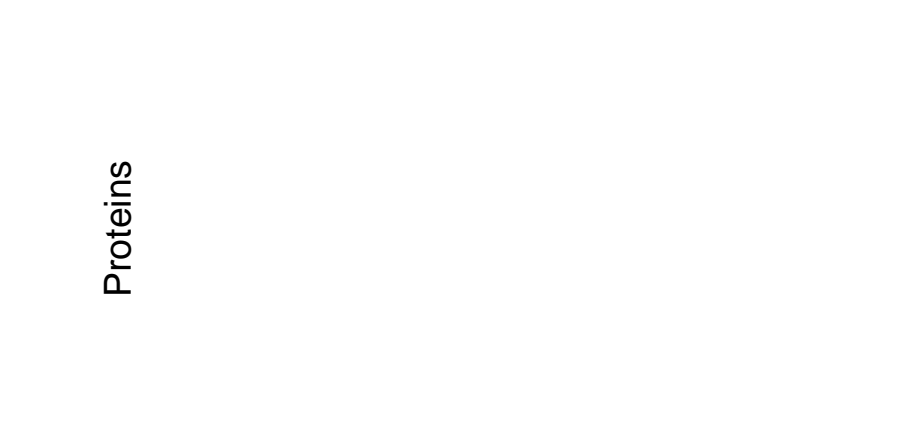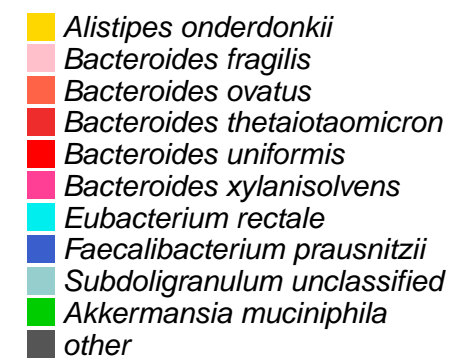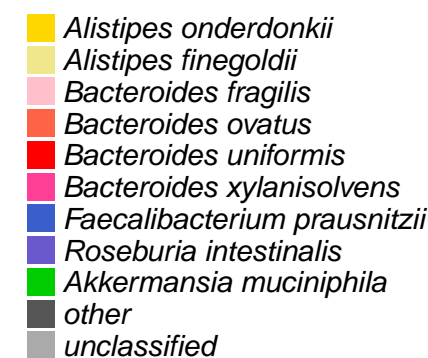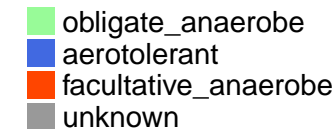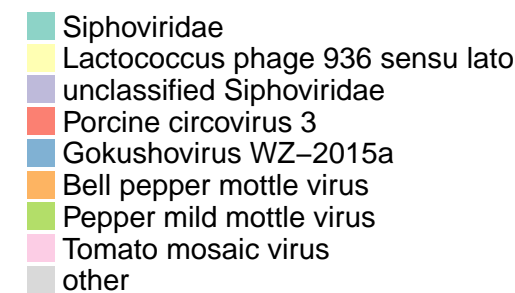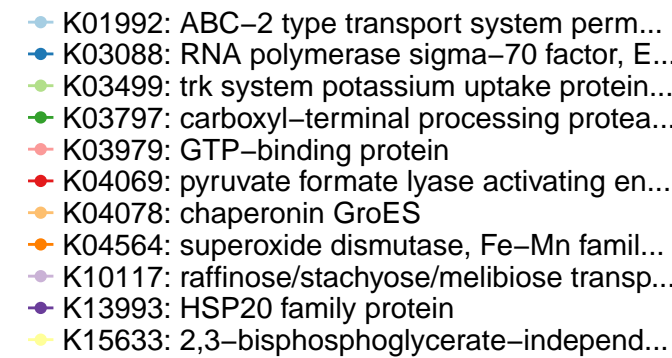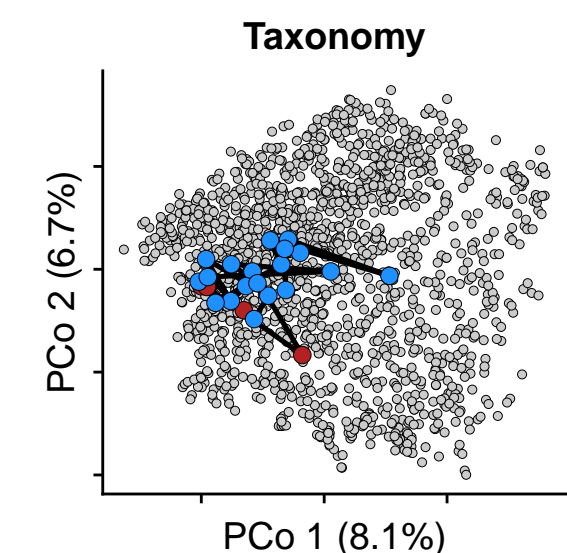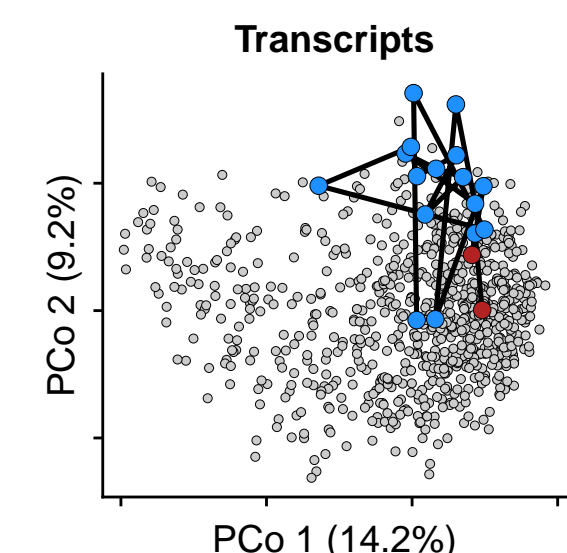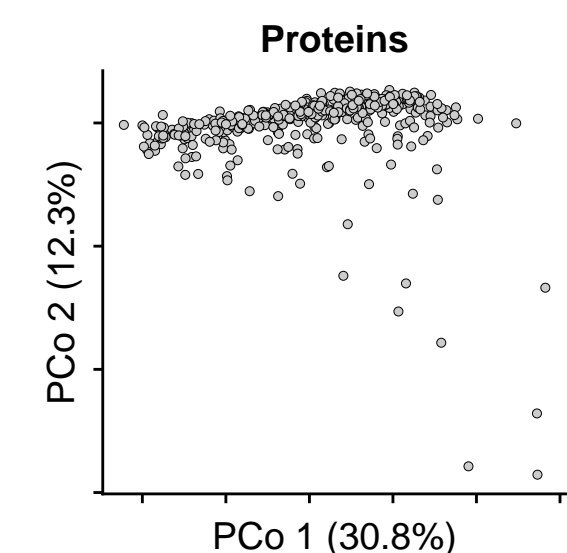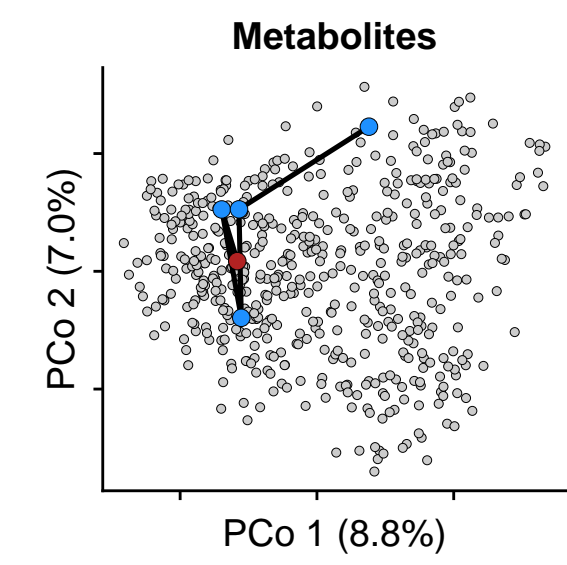

# H4022: 9 Female White Cincinnati | nonIBD

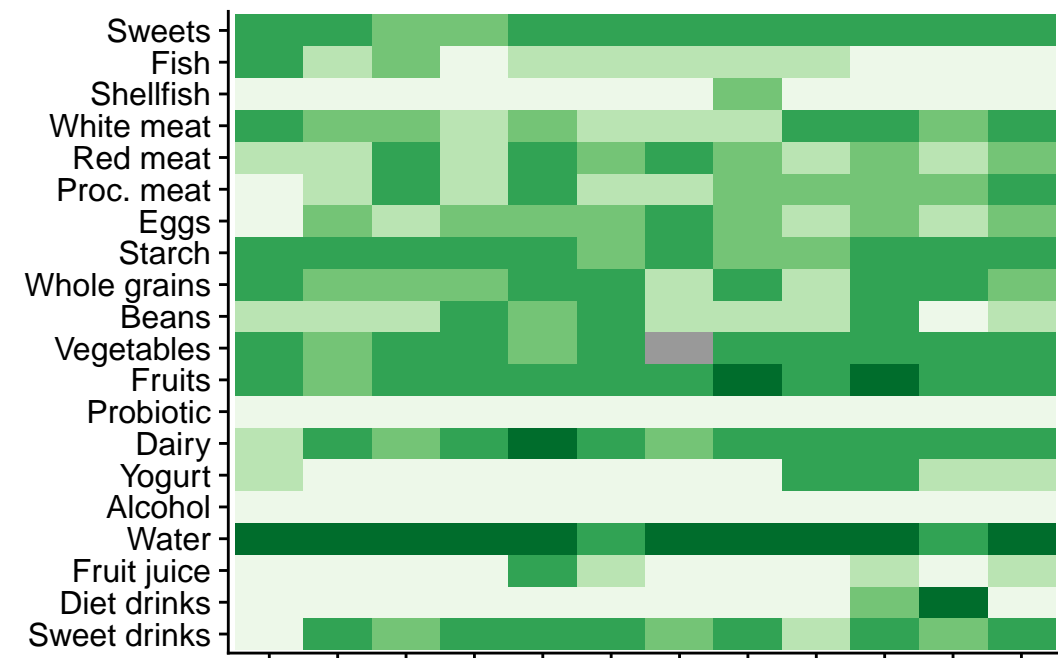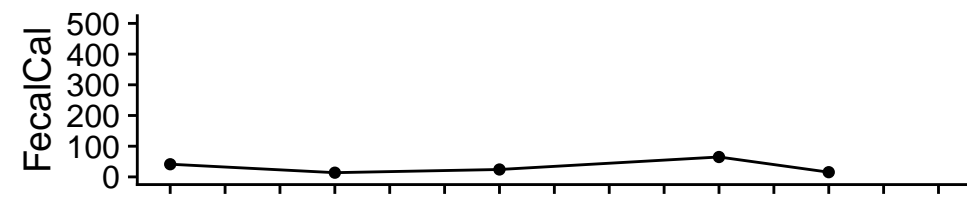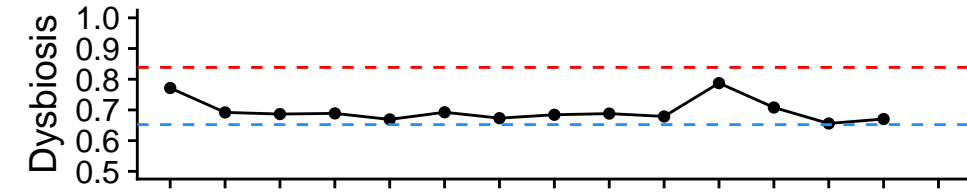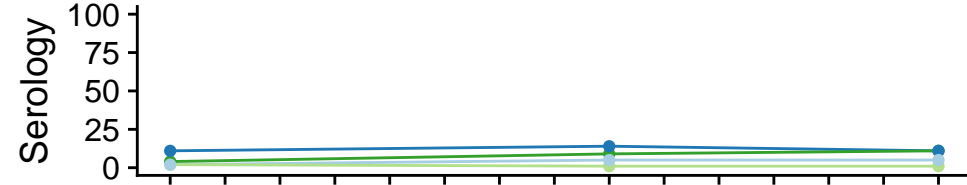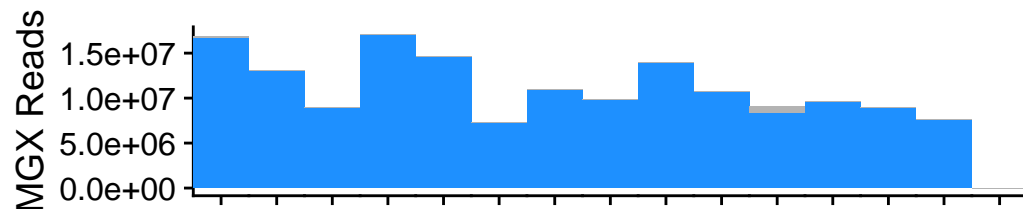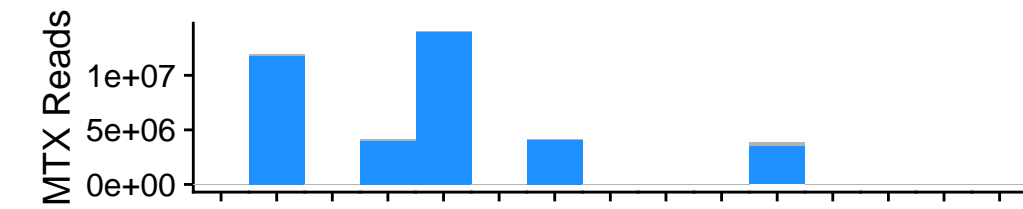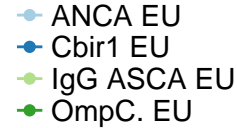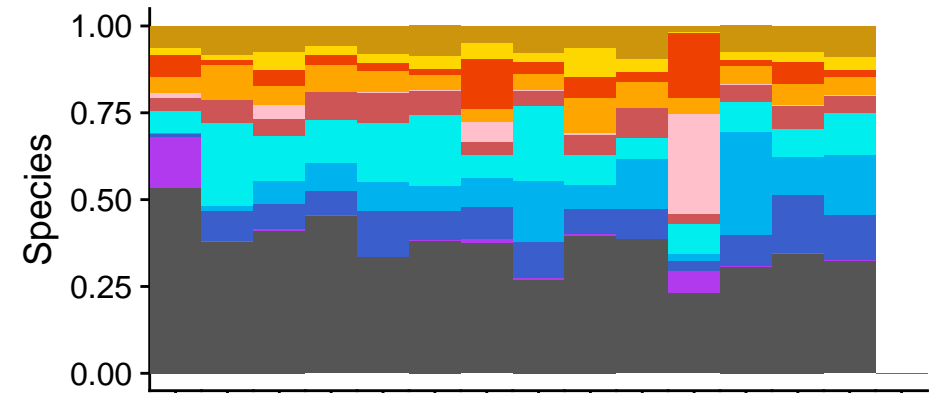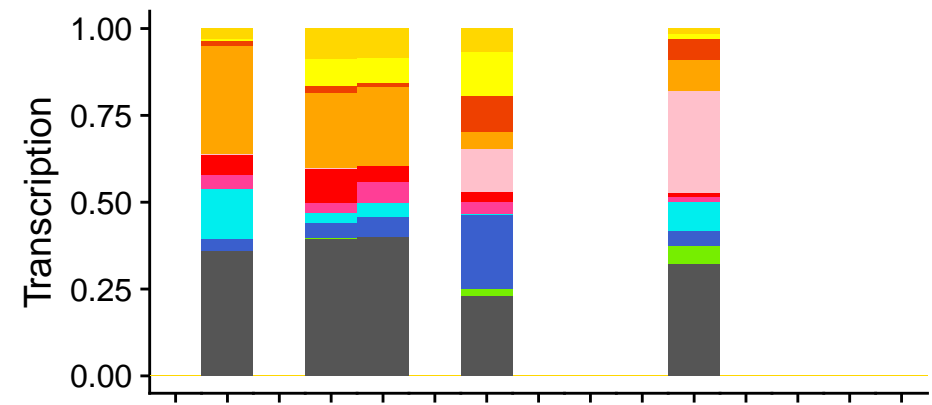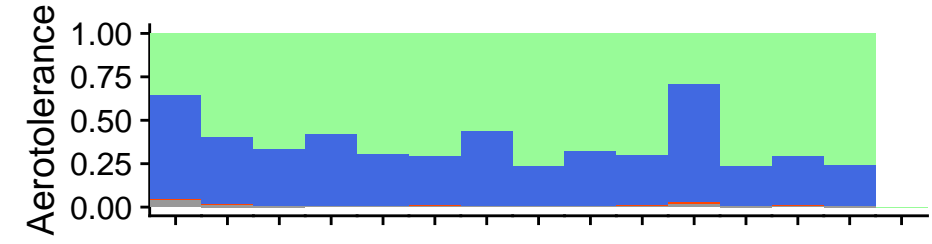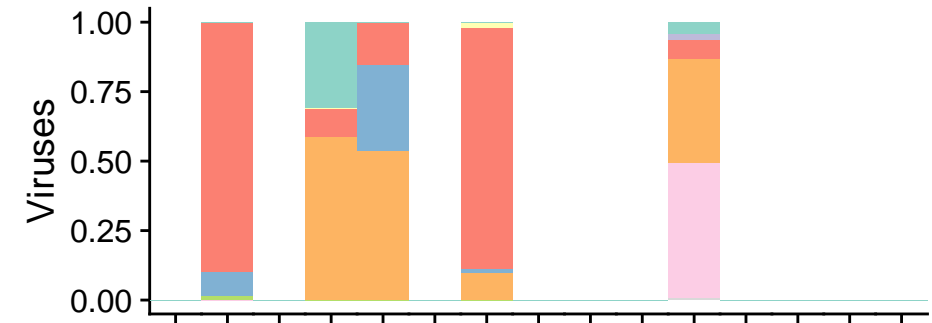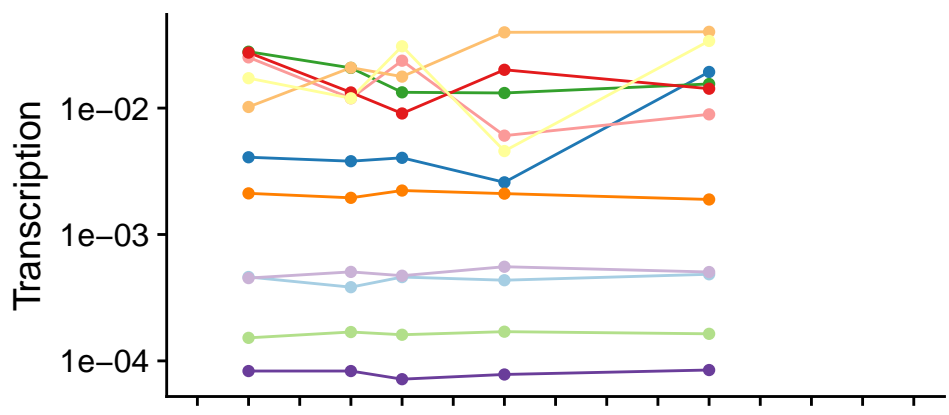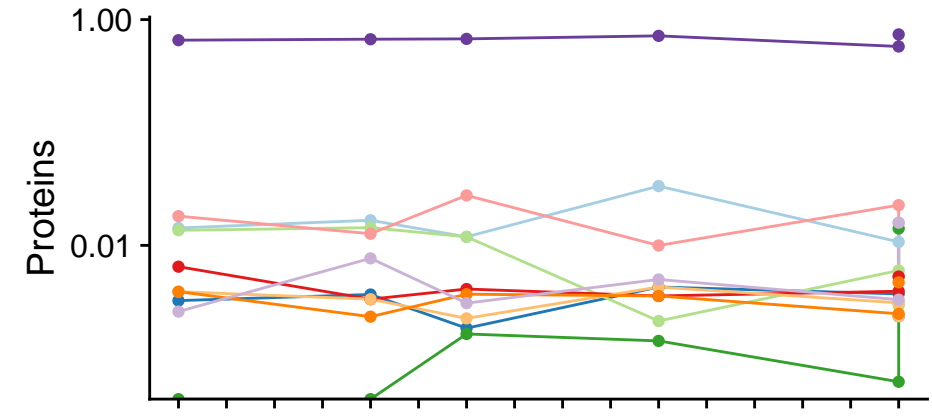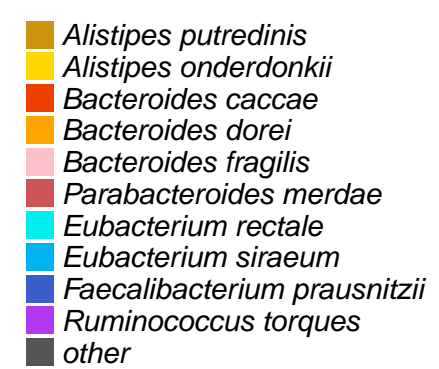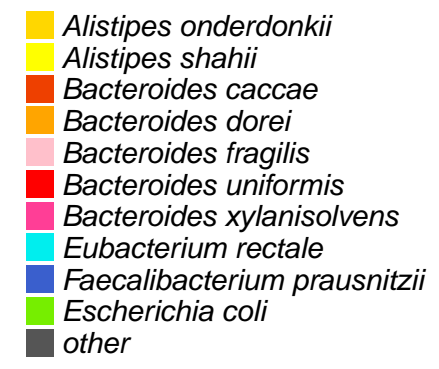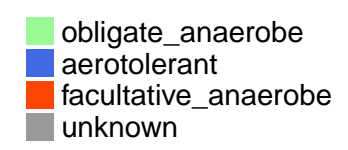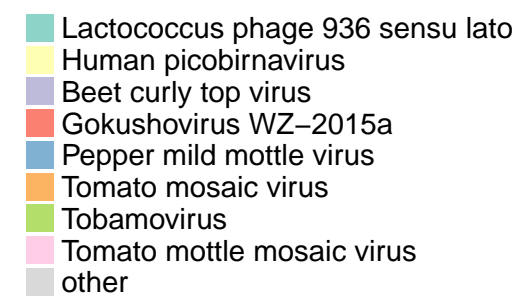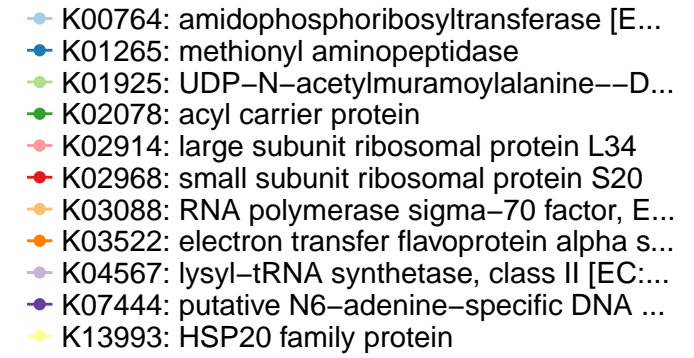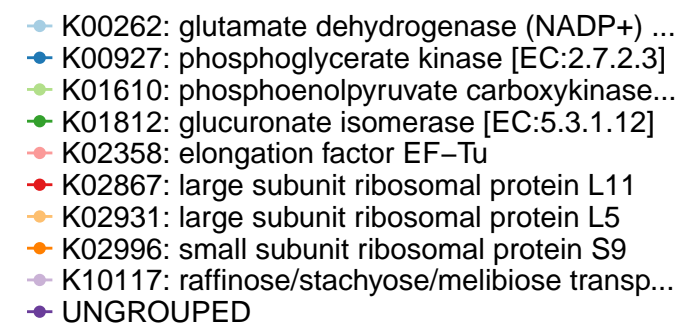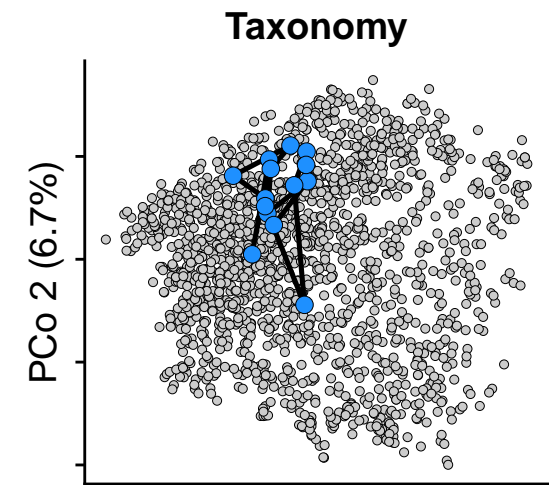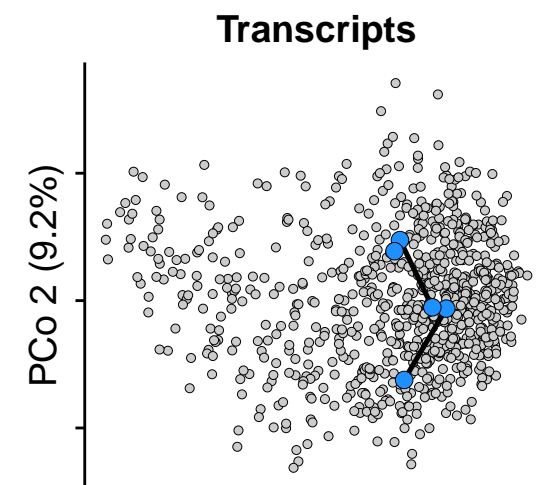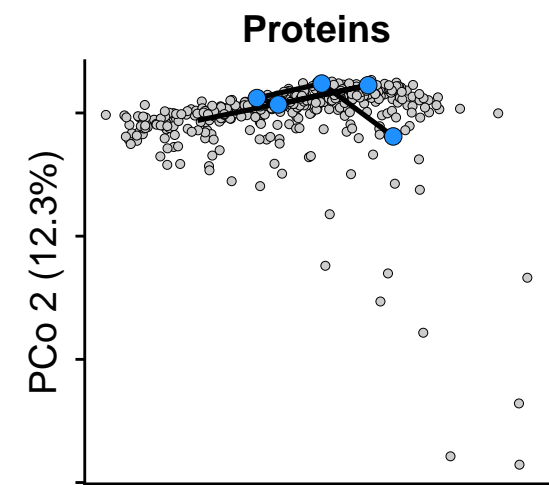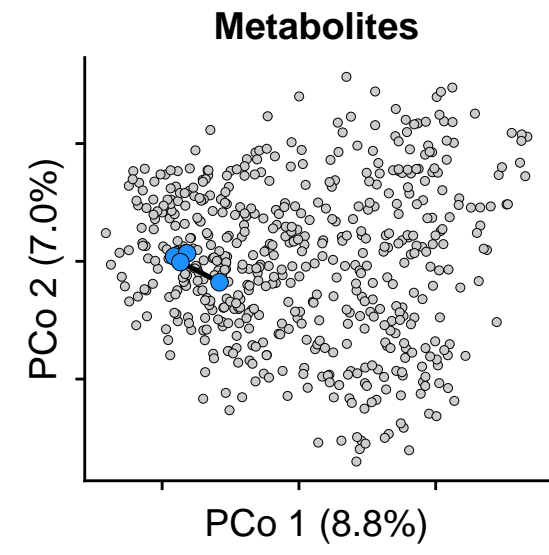

# H4023: 16 Male White Cincinnati | nonIBD

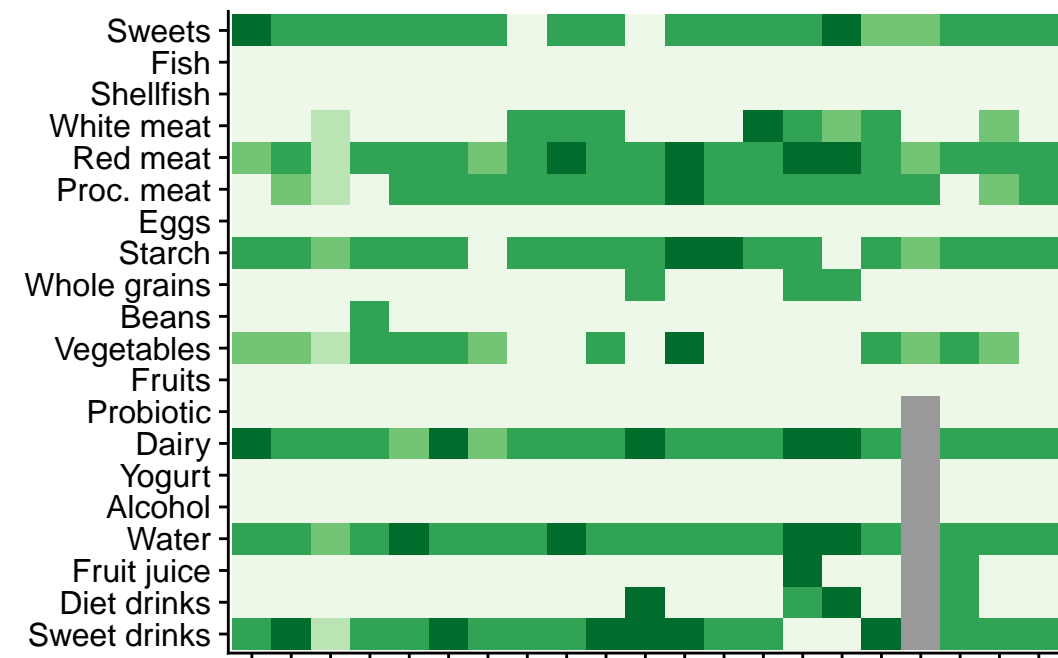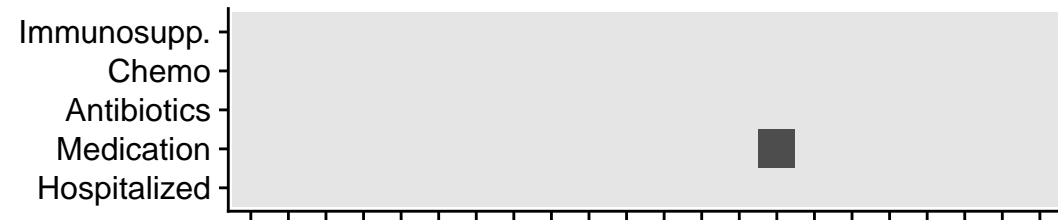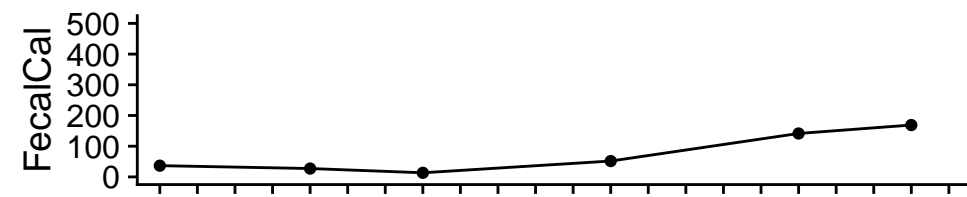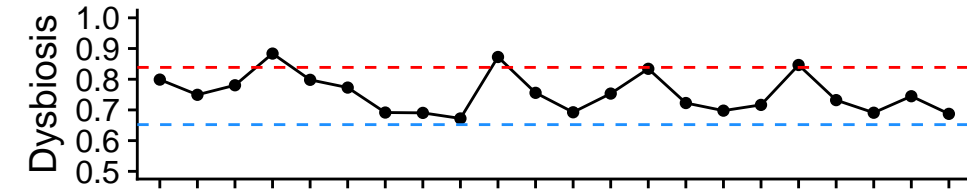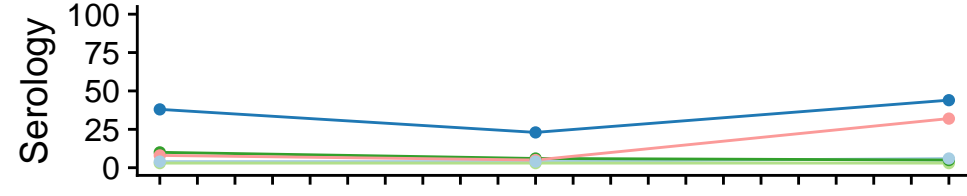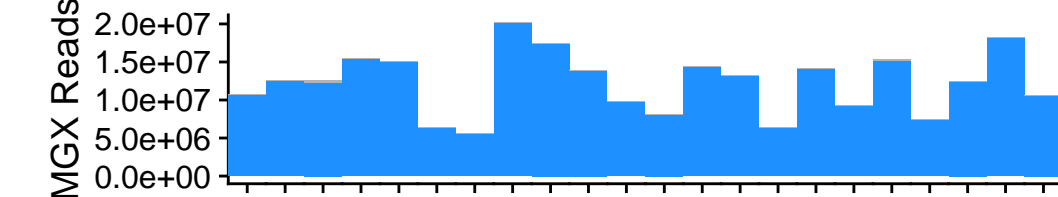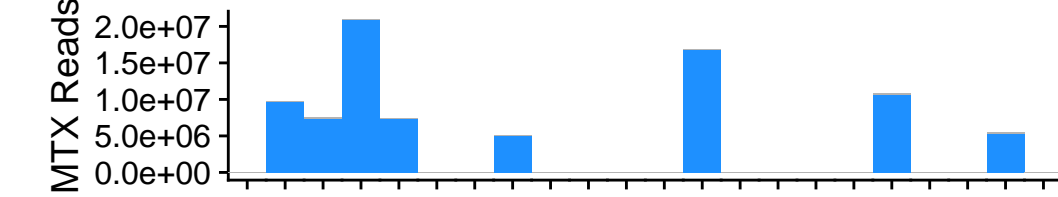

Blank  
None 7+ days  
Within 4-7 days  
Within 2-3 days  
Yesterday 1-2x  
Yesterday 3x+

No  
Blank

Dysbiosis  
Eubiosis

ANCA EU  
Cbir1 EU  
IgA ASCA EU  
IgG ASCA EU  
OmpC. EU

Human  
Filtered

Human  
Filtered

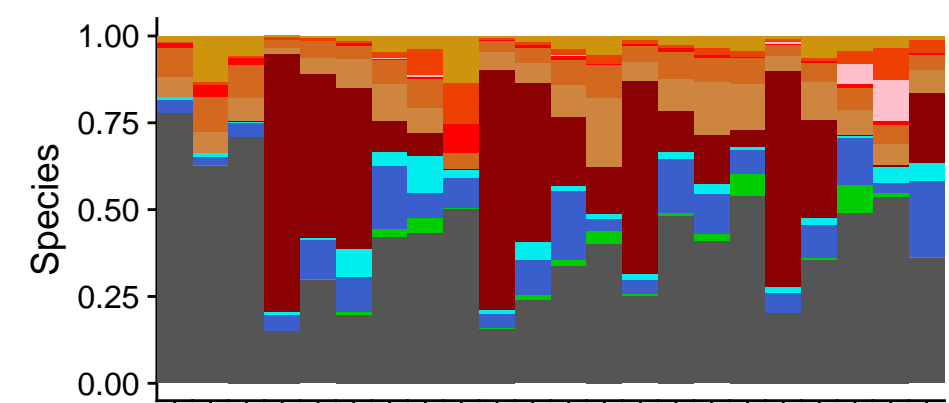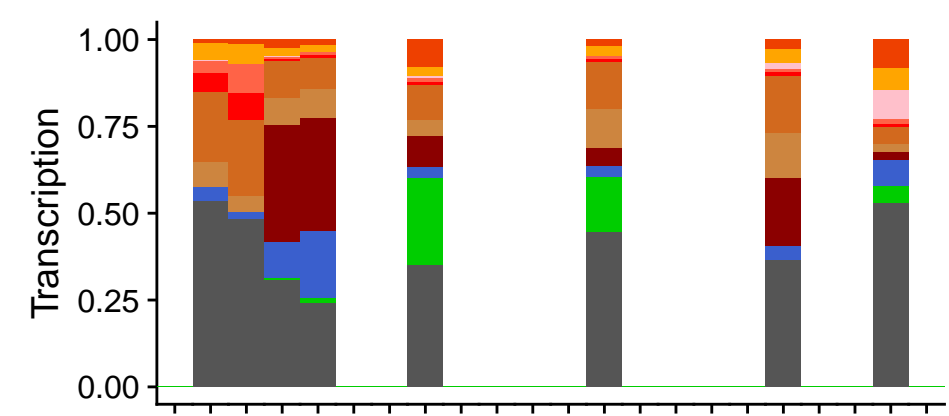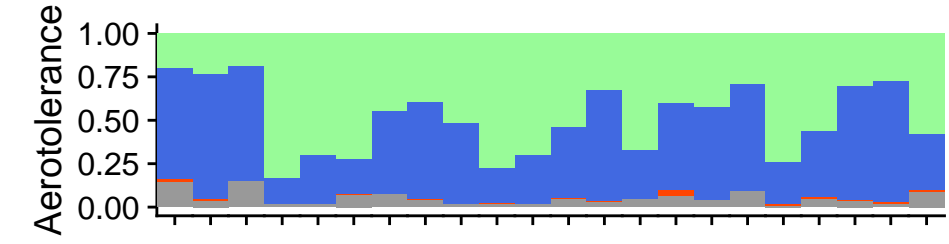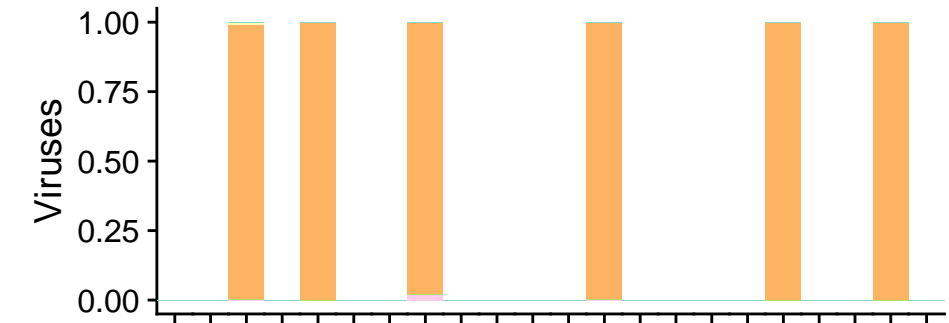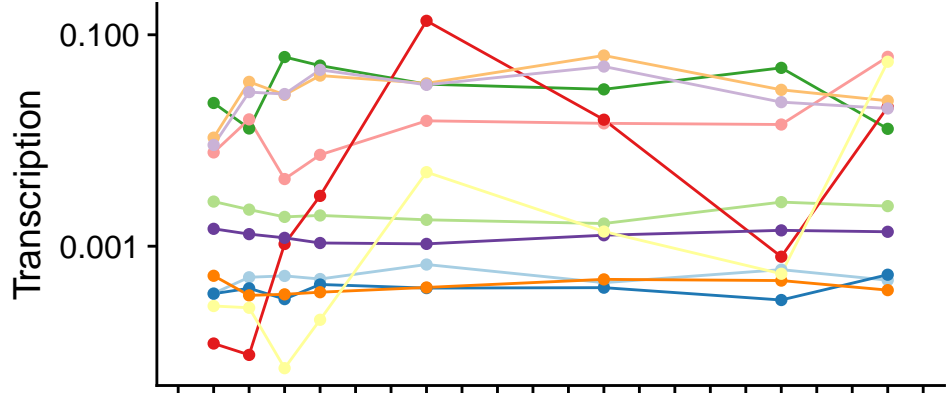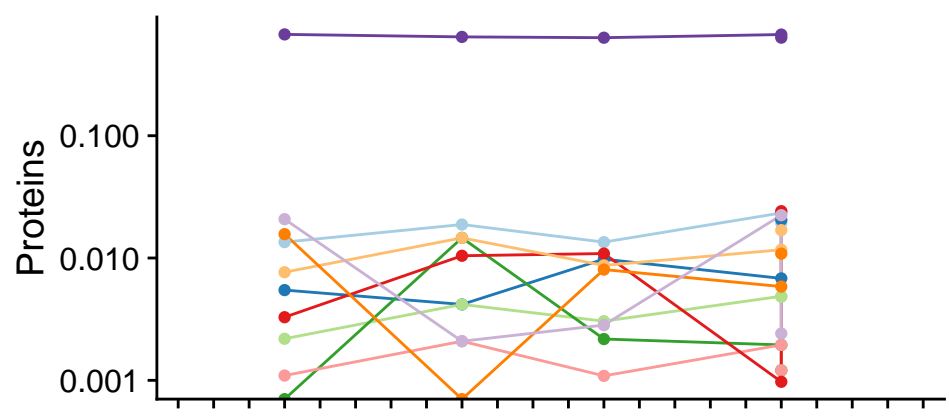

*Alistipes putredinis*  
*Bacteroides caccae*  
*Bacteroides fragilis*  
*Bacteroides uniformis*  
*Bacteroides vulgatus*  
*Bacteroides massiliensis*  
*Prevotella copri*  
*Eubacterium rectale*  
*Faecalibacterium prausnitzii*  
*Akkermansia muciniphila*  
other

*Bacteroides caccae*  
*Bacteroides dorei*  
*Bacteroides fragilis*  
*Bacteroides ovatus*  
*Bacteroides uniformis*  
*Bacteroides vulgatus*  
*Bacteroides massiliensis*  
*Prevotella copri*  
*Faecalibacterium prausnitzii*  
*Akkermansia muciniphila*  
other

obligate anaerobe  
aerotolerant  
facultative anaerobe  
unknown

T7virus  
Podoviridae  
Pseudomonas phage PPpW-4  
unclassified Siphoviridae  
Chicken anemia virus  
Gokushovirus WZ-2015a  
Parabacteroides phage YZ-2015b  
Pepper mild mottle virus

K01579: aspartate 1-decarboxylase [EC:4.1....  
K01875: seryl-tRNA synthetase [EC:6.1.1.11]  
K02356: elongation factor EF-P  
K02914: large subunit ribosomal protein L34  
K03088: RNA polymerase sigma-70 factor, E...  
K04069: pyruvate formate lyase activating en...  
K04078: chaperonin GroES  
K06187: recombination protein RecR  
K13993: HSP20 family protein  
K15633: 2,3-bisphosphoglycerate-independ...  
K19158: NO\_NAME

K00262: glutamate dehydrogenase (NADP+) ...  
K01610: phosphoenolpyruvate carboxykinase...  
K02357: elongation factor EF-Ts  
K02879: large subunit ribosomal protein L17  
K02982: small subunit ribosomal protein S3  
K03737: pyruvate-ferredoxin/flavodoxin oxido...  
K04043: molecular chaperone DnaK  
K04077: chaperonin GroEL  
K10117: raffinose/stachyose/melibiose transp...  
UNGROUPED

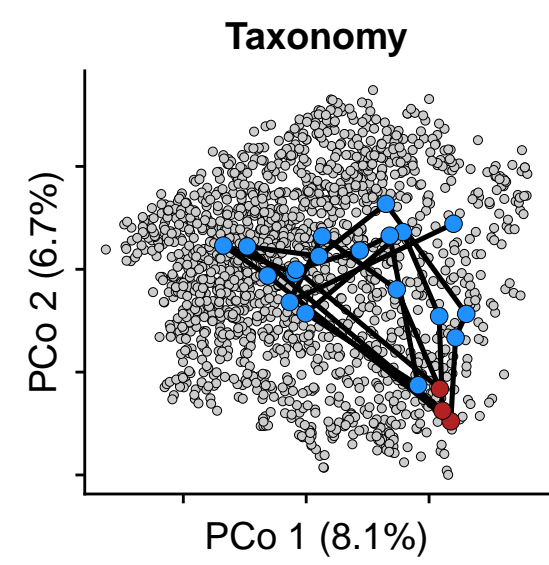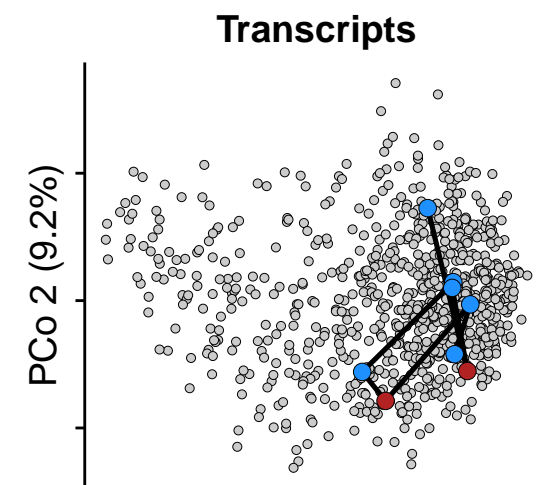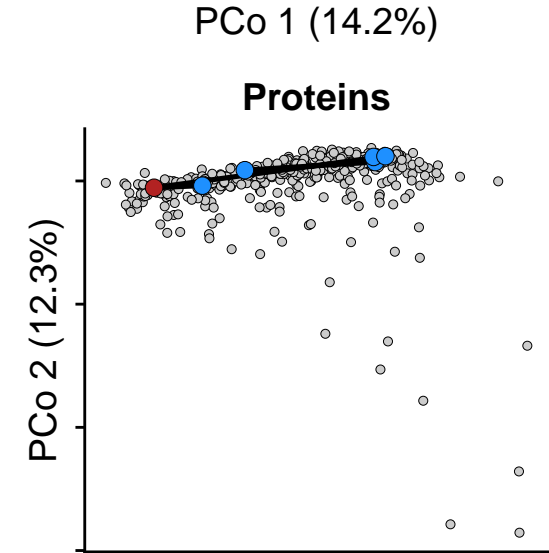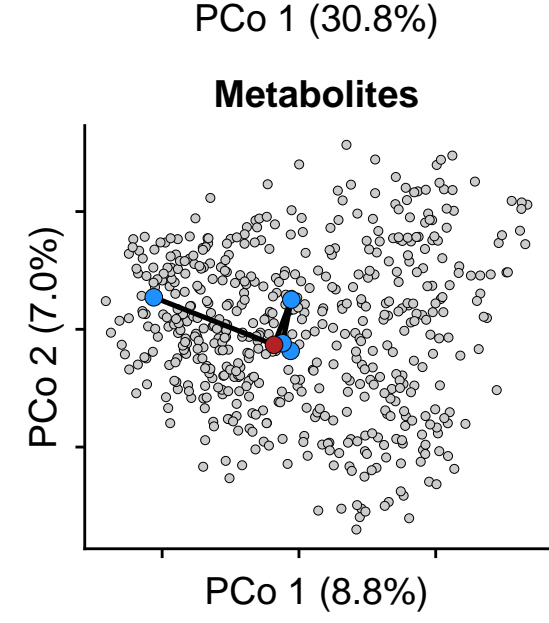

# H4024: 11 Male White Cincinnati | nonIBD

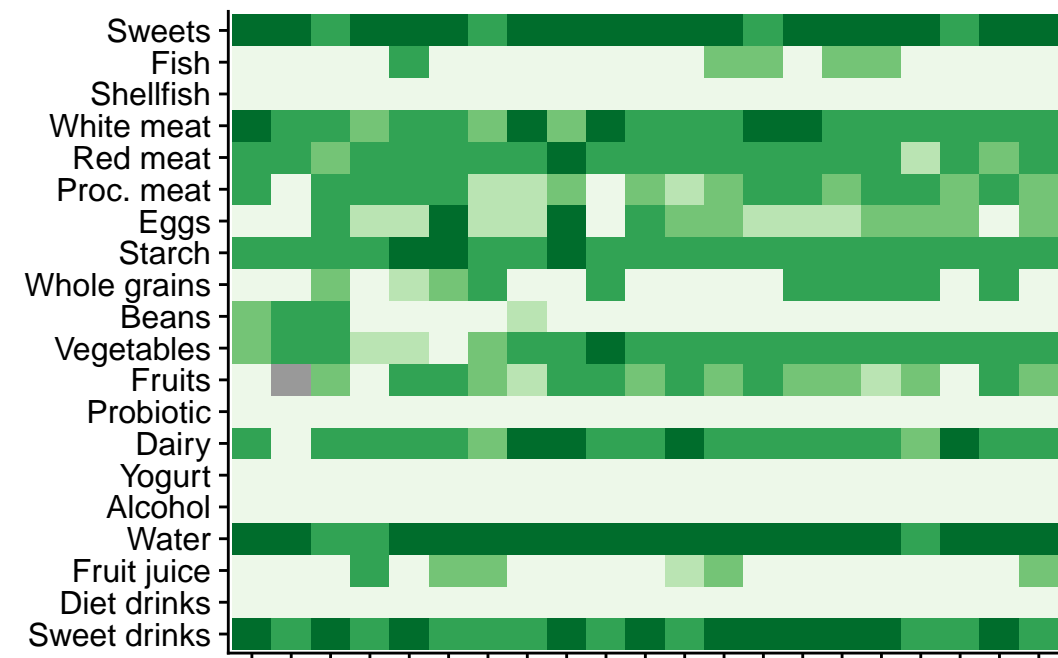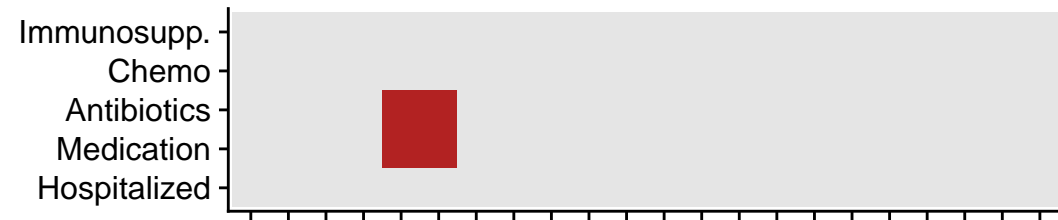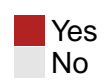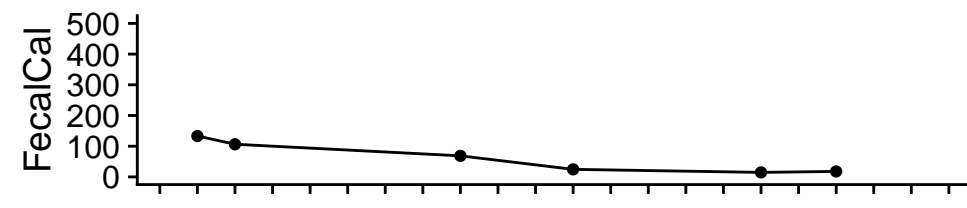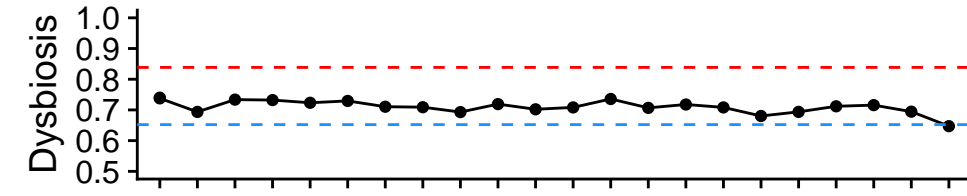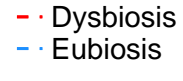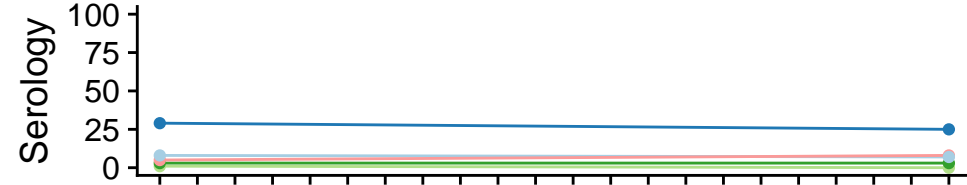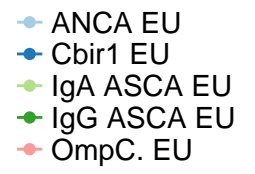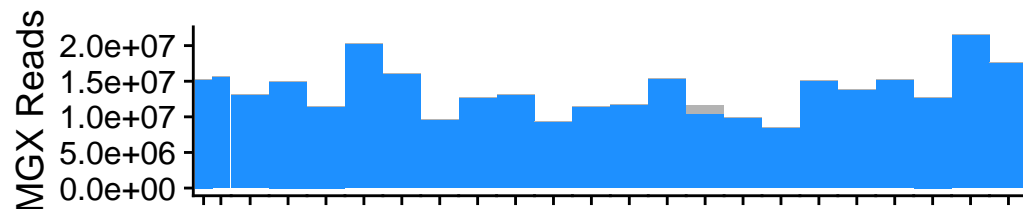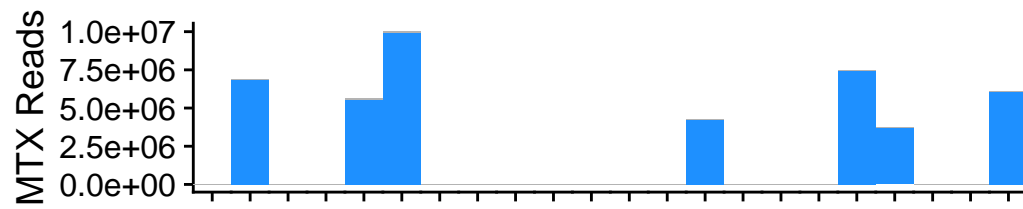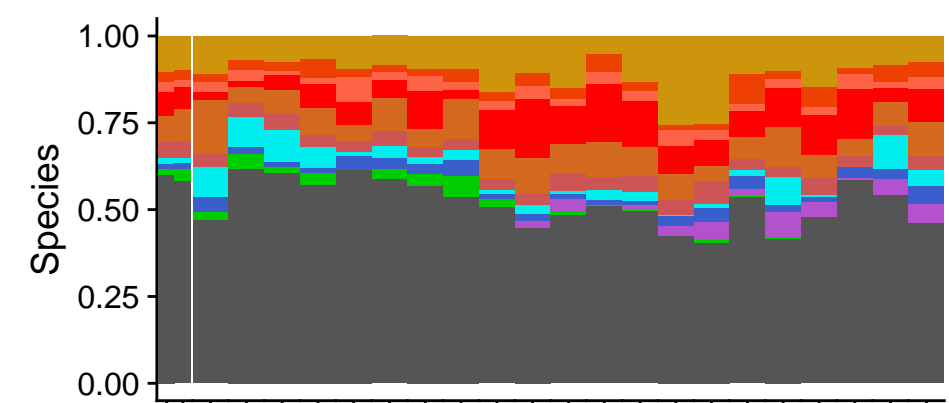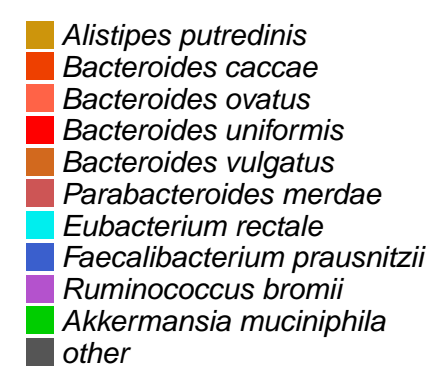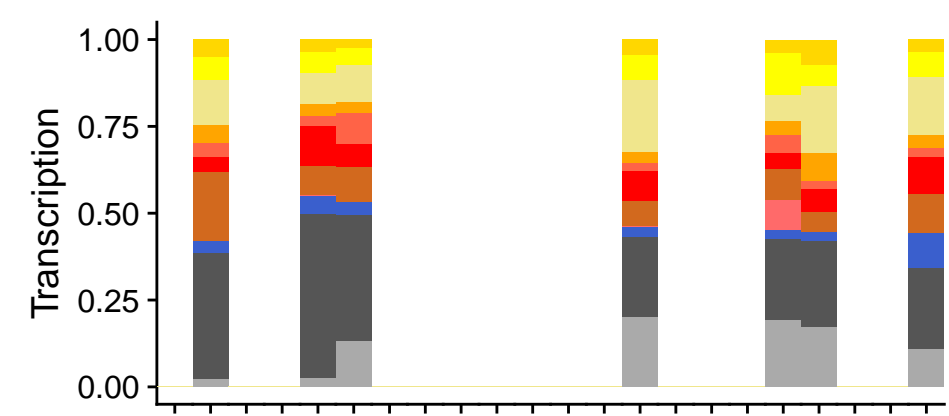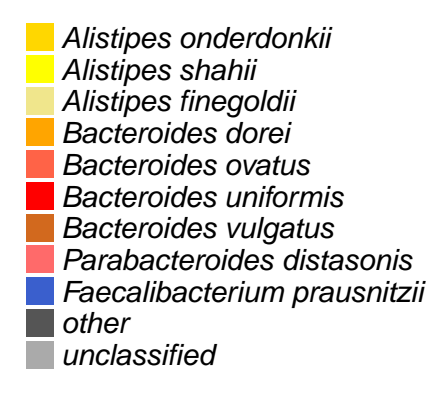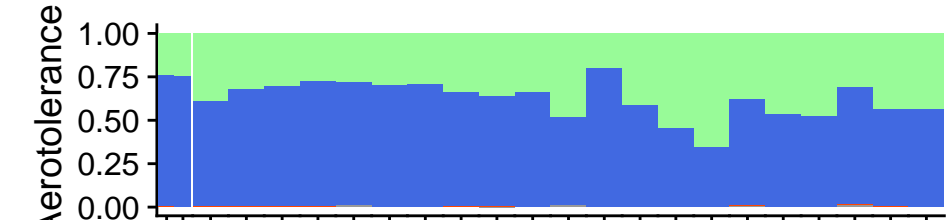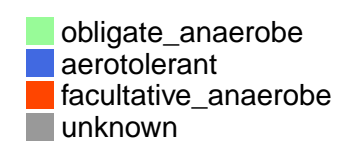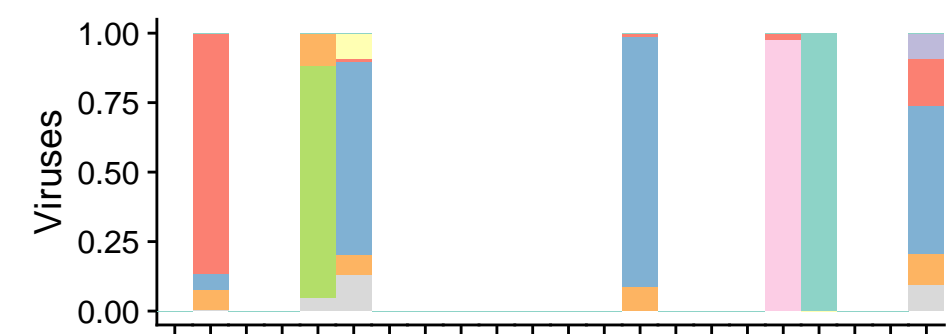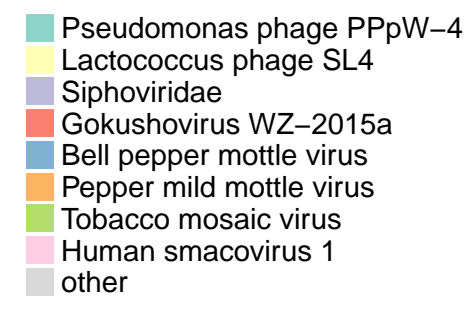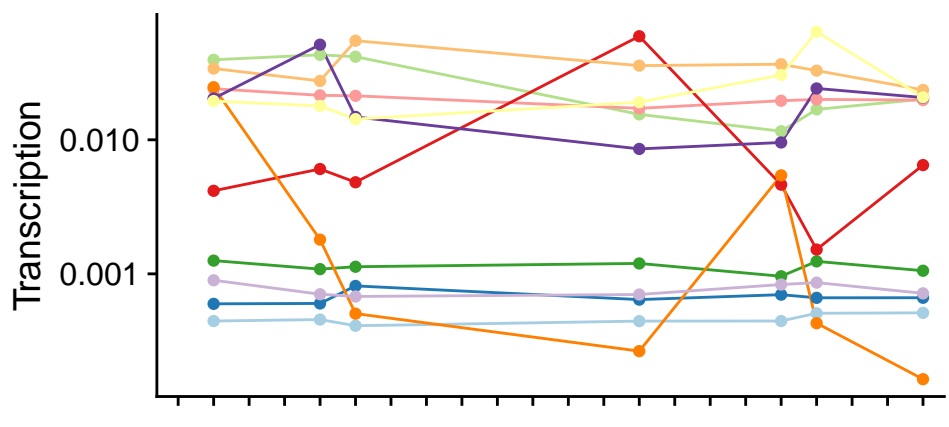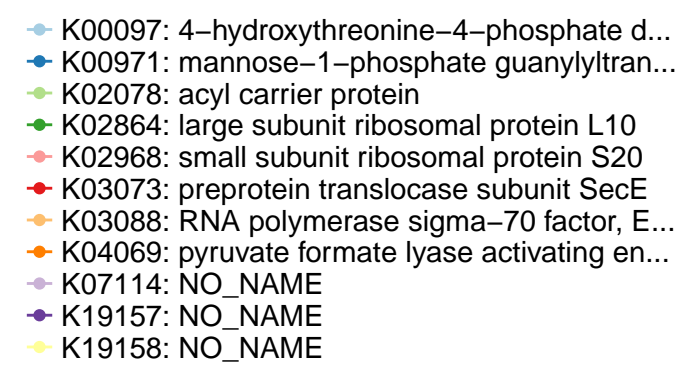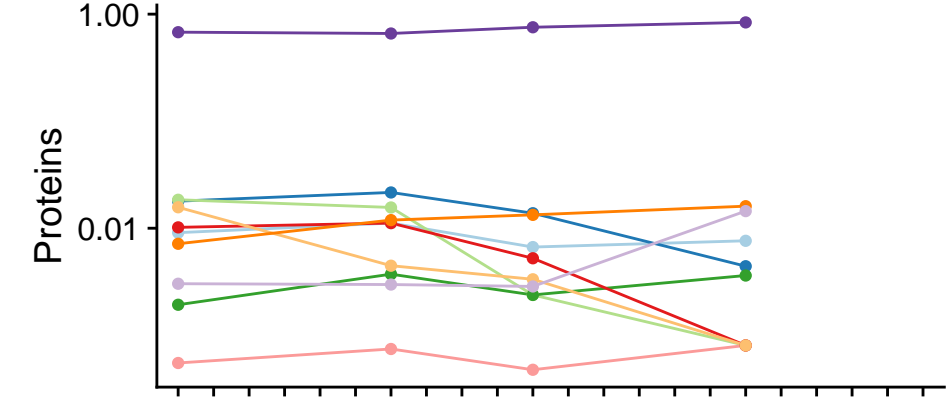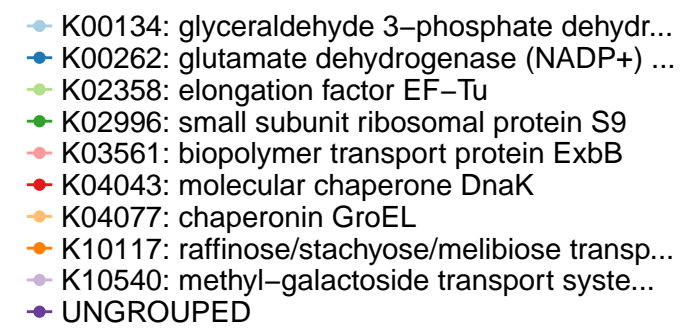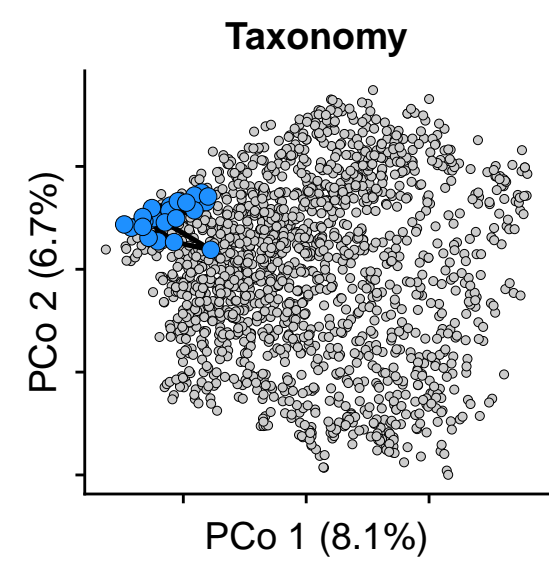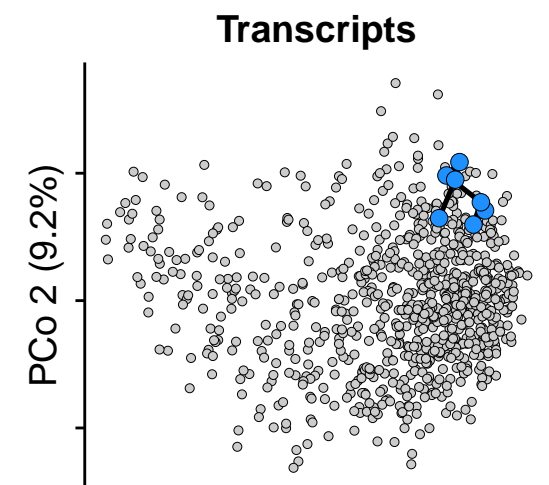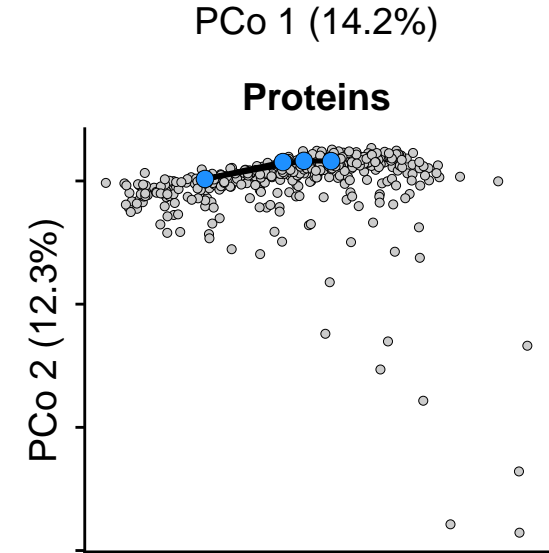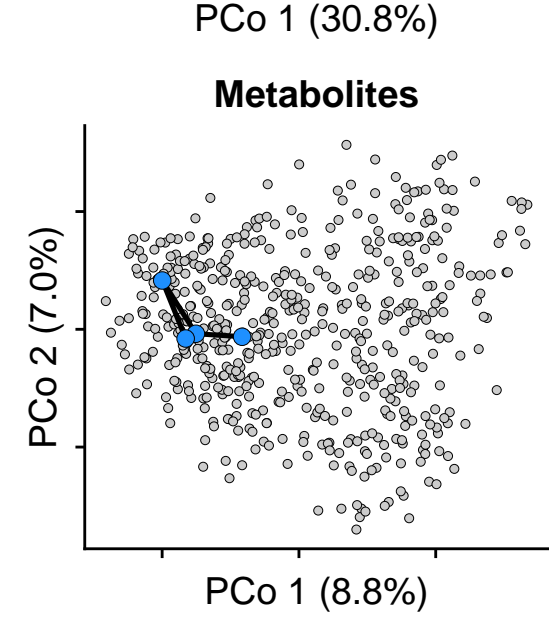

# H4027: 15 Male White Cincinnati | UC L2+L4

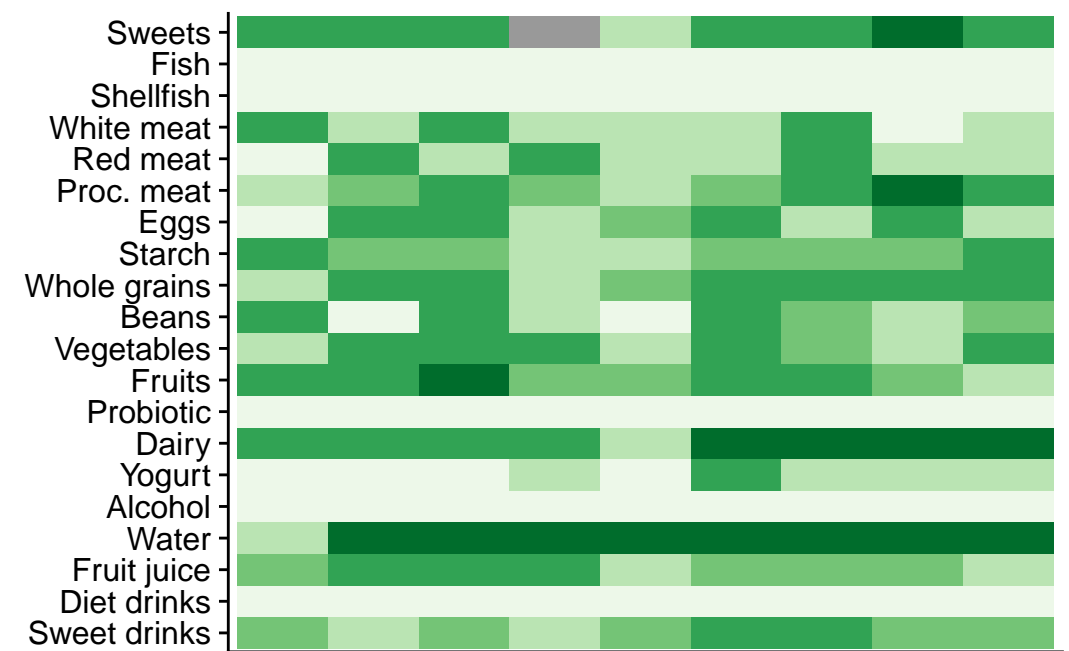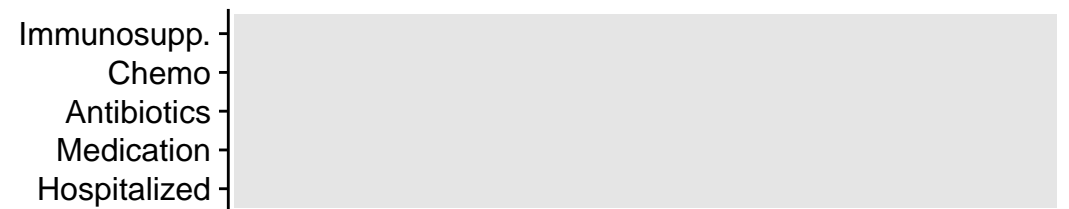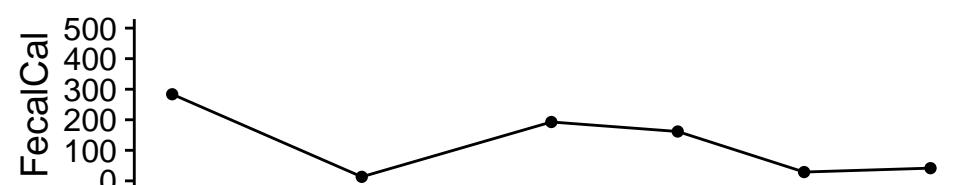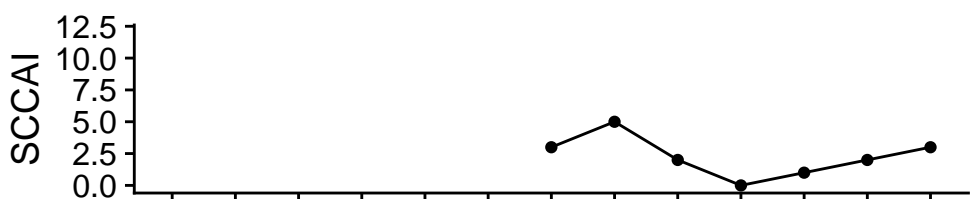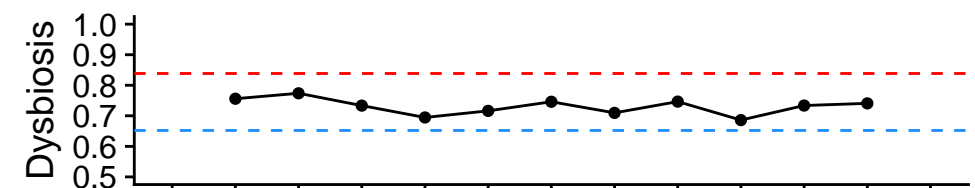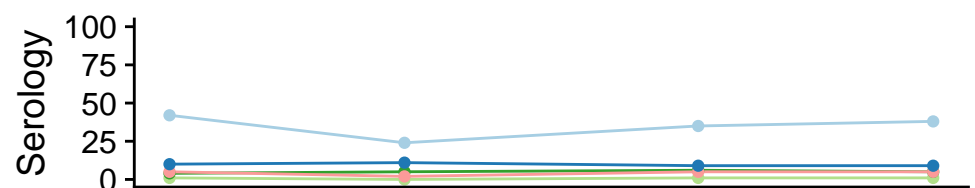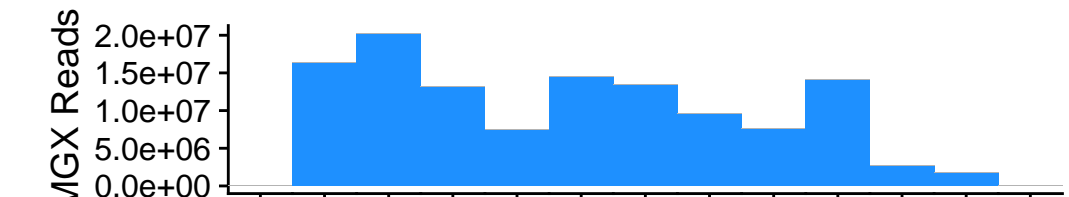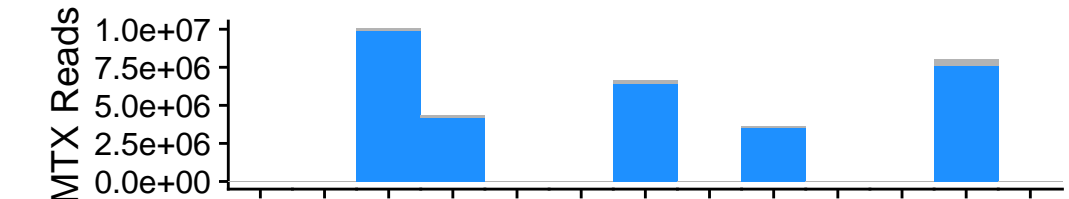

Blank  
None 7+ days  
Within 4-7 days  
Within 2-3 days  
Yesterday 1-2x  
Yesterday 3x+

No

Dysbiosis  
Eubiosis

ANCA EU  
Cbir1 EU  
IgA ASCA EU  
IgG ASCA EU  
OmpC. EU

Human  
Filtered

Human  
Filtered

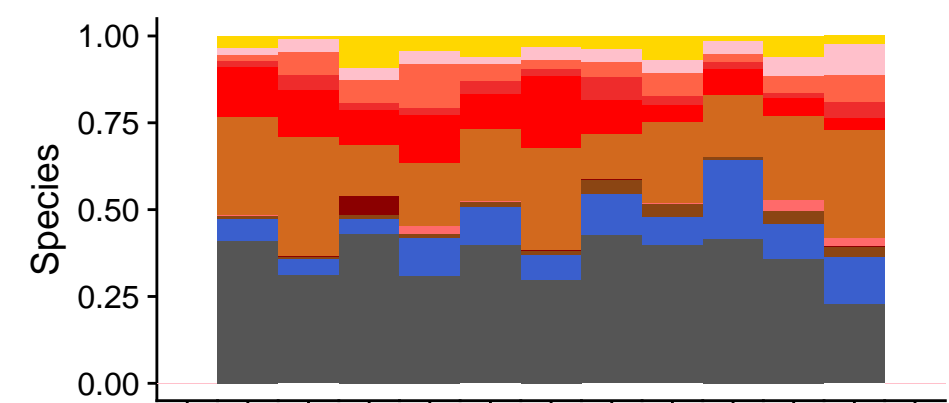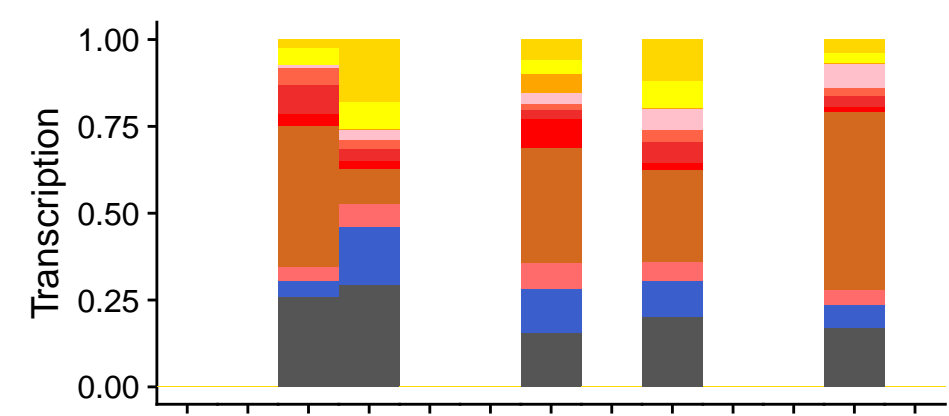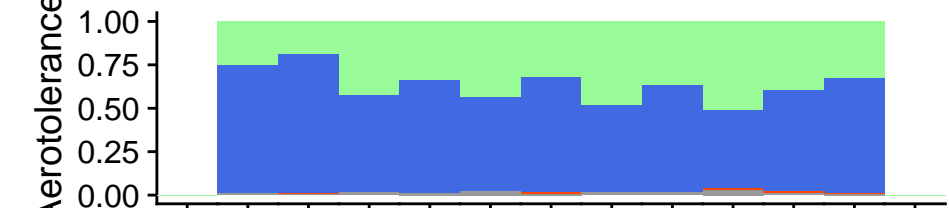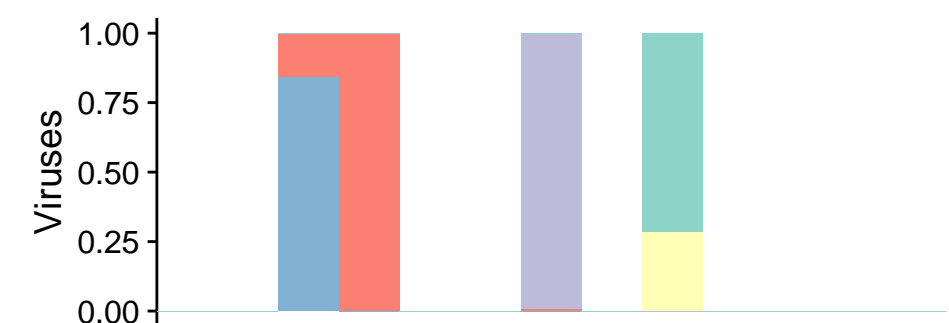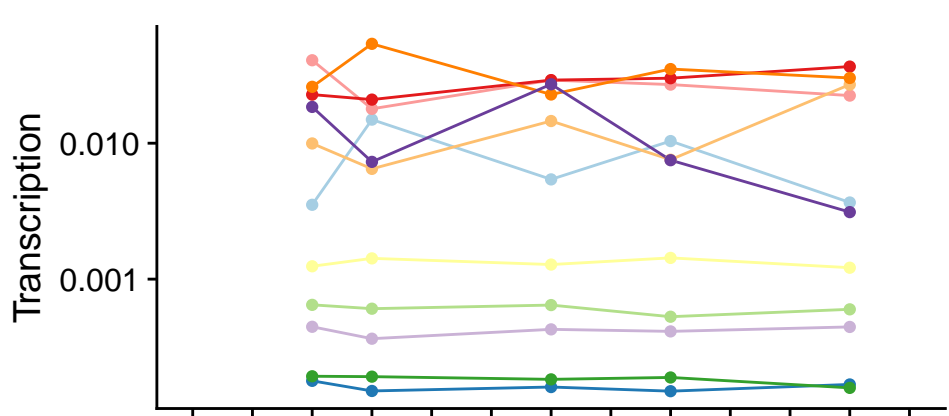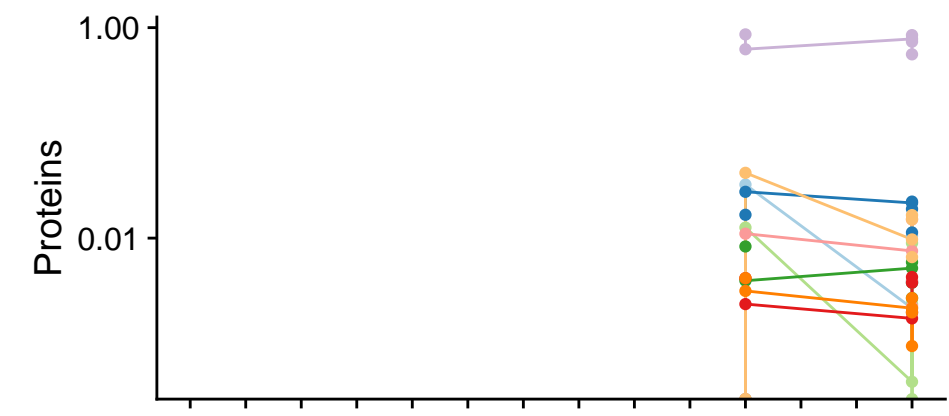

Alistipes onderdonkii  
Bacteroides fragilis  
Bacteroides ovatus  
Bacteroides thetaiotaomicron  
Bacteroides uniformis  
Bacteroides vulgatus  
Parabacteroides distasonis  
Prevotella copri  
Odoribacter splanchnicus  
Faecalibacterium prausnitzii  
other

Alistipes onderdonkii  
Alistipes shahii  
Bacteroides dorei  
Bacteroides fragilis  
Bacteroides ovatus  
Bacteroides thetaiotaomicron  
Bacteroides uniformis  
Bacteroides vulgatus  
Parabacteroides distasonis  
Faecalibacterium prausnitzii  
other

obligate anaerobe  
aerotolerant  
facultative anaerobe  
unknown

unclassified Siphoviridae  
Gyrovirus GyV3  
Gokushovirus WZ-2015a  
Pepper mild mottle virus  
Tobacco mosaic virus

K00024: malate dehydrogenase [EC:1.1.1.37]  
K00768: nicotinate-nucleotide--dimethylben...  
K01462: NO\_NAME  
K01673: carbonic anhydrase [EC:4.2.1.1]  
K02078: acyl carrier protein  
K02968: small subunit ribosomal protein S20  
K03073: preprotein translocase subunit SecE  
K03088: RNA polymerase sigma-70 factor, E...  
K08998: hypothetical protein  
K12343: 3-oxo-5-alpha-steroid 4-dehydrog...  
K15633: 2,3-bisphosphoglycerate-independ...

K00134: glyceraldehyde 3-phosphate dehydr...  
K00262: glutamate dehydrogenase (NADP+) ...  
K01689: enolase [EC:4.2.1.11]  
K01803: triosephosphate isomerase (TIM) [E...  
K01812: glucuronate isomerase [EC:5.3.1.12]  
K02931: large subunit ribosomal protein L5  
K10117: raffinose/stachyose/melibiose transp...  
K15633: 2,3-bisphosphoglycerate-independ...  
UNGROUPED

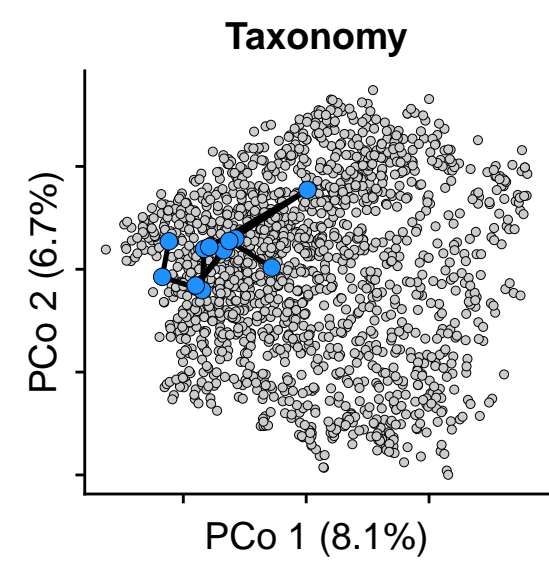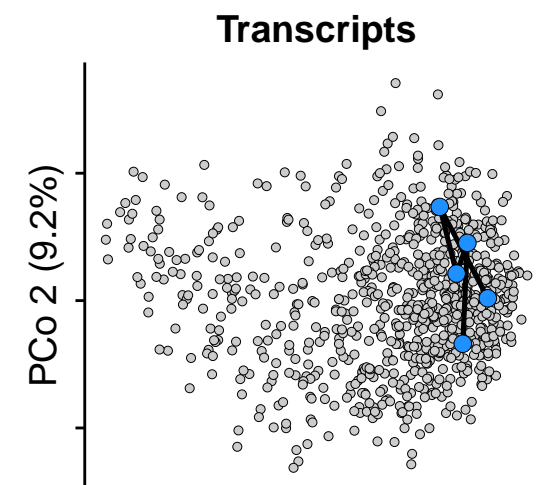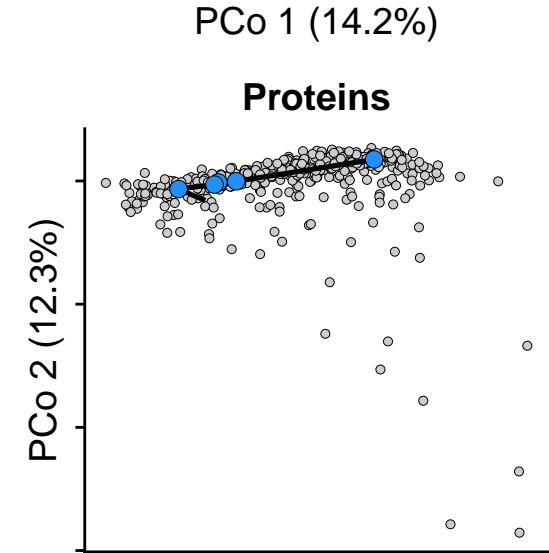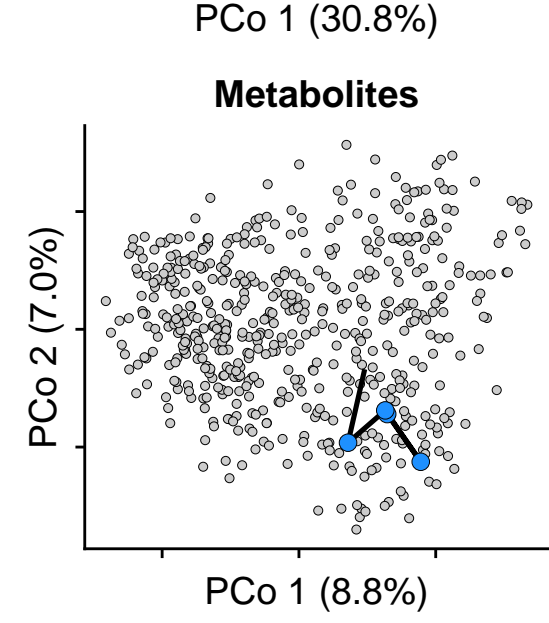

# H4028: 13 Female White Cincinnati | CD L1+L4

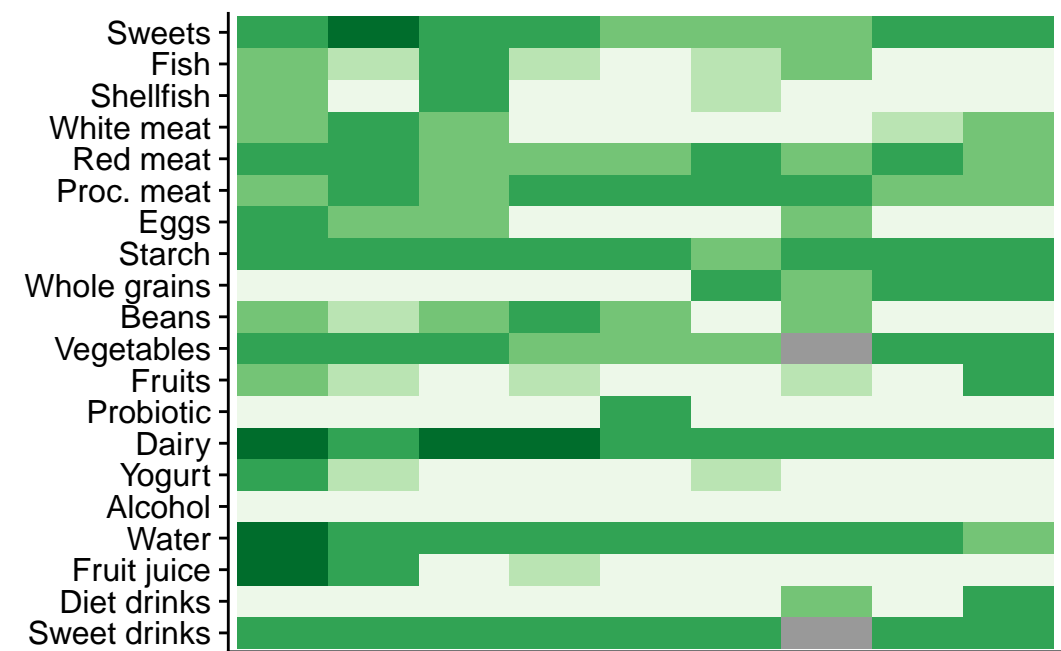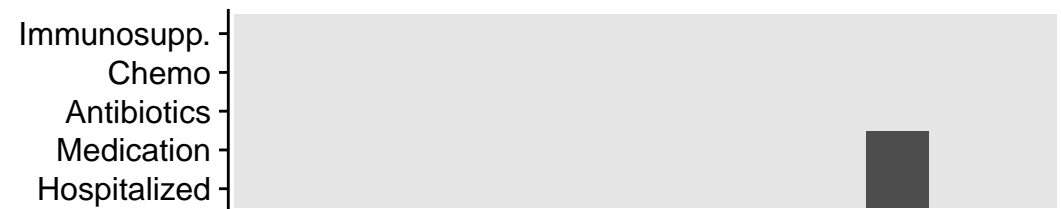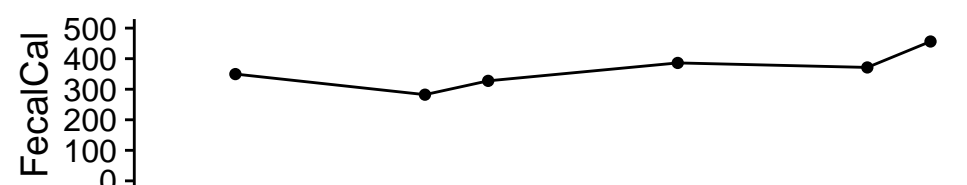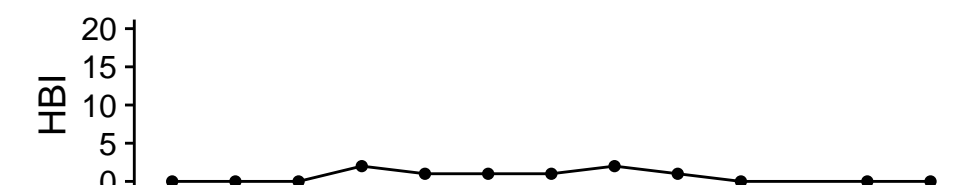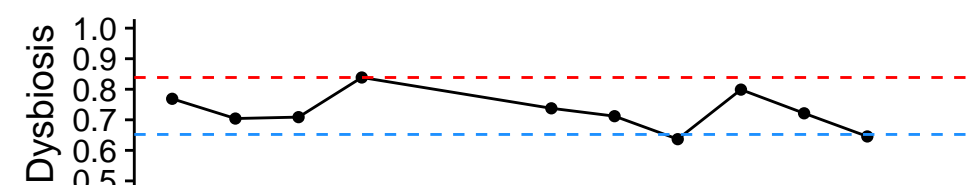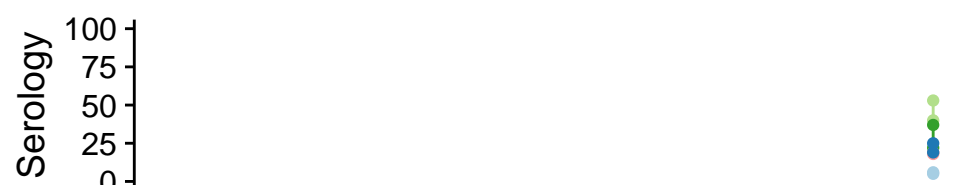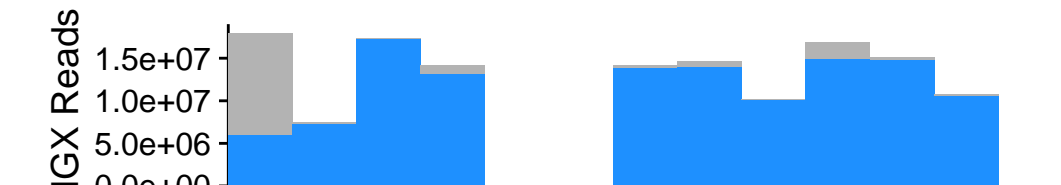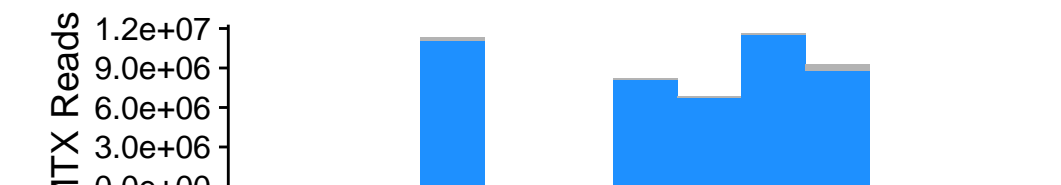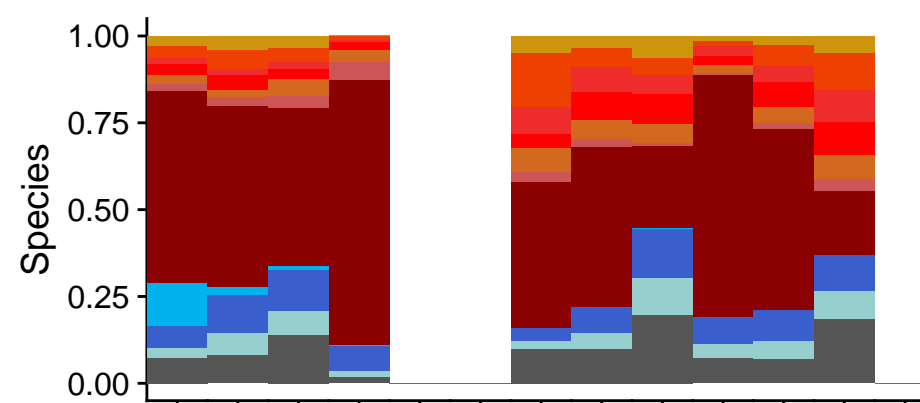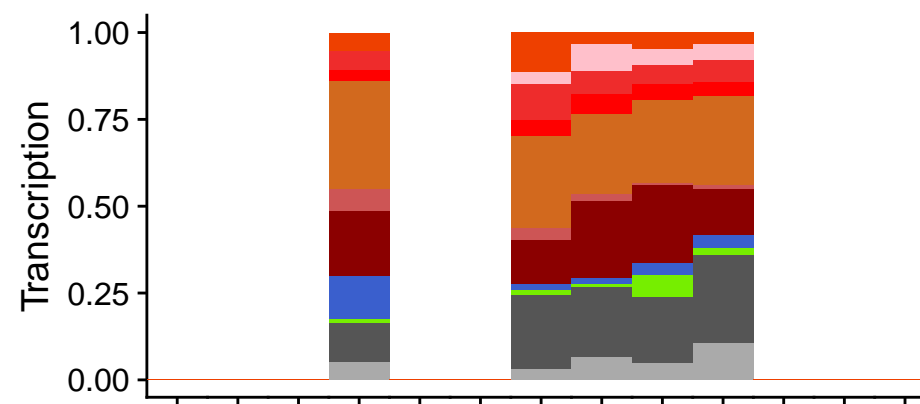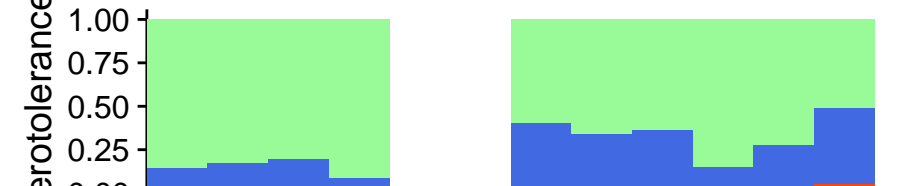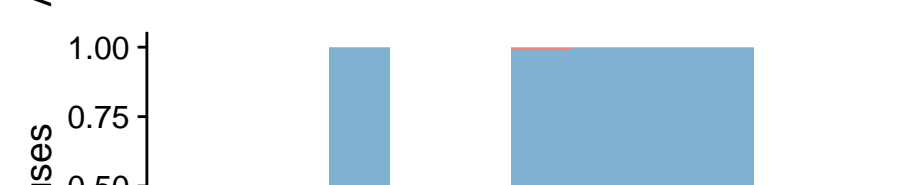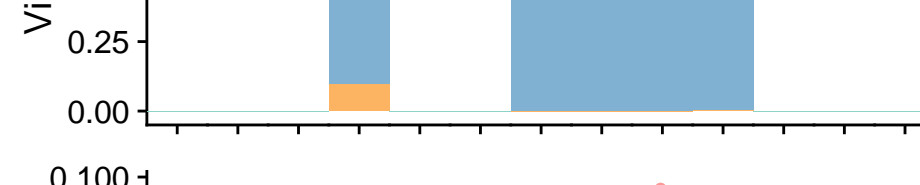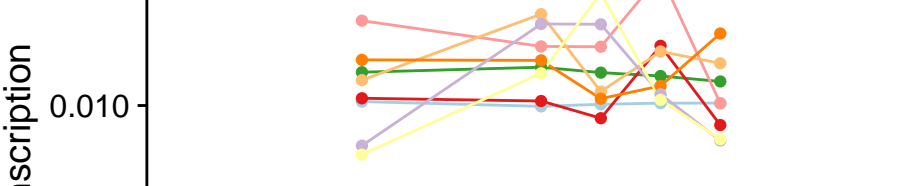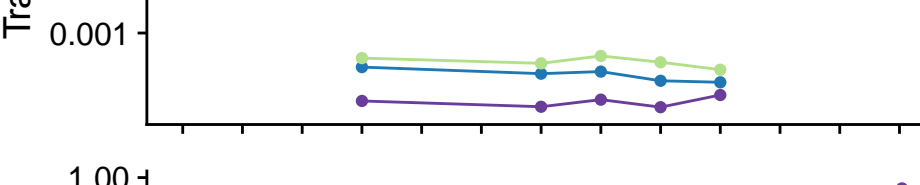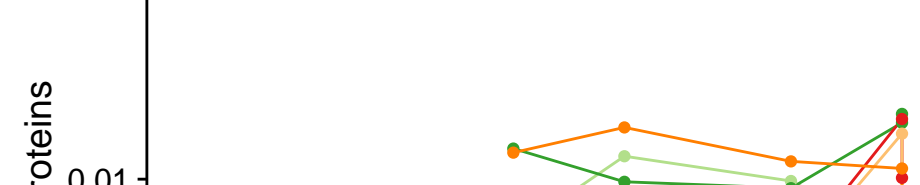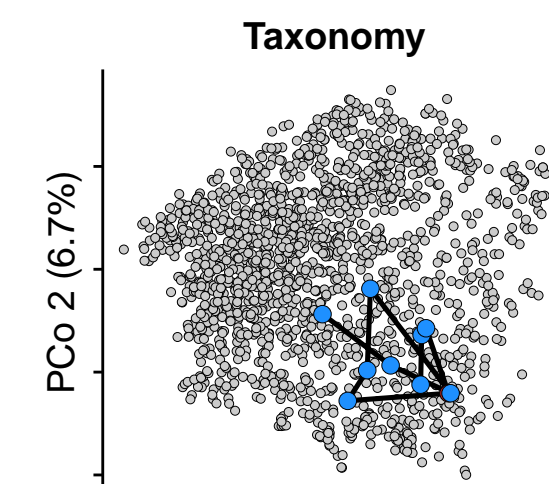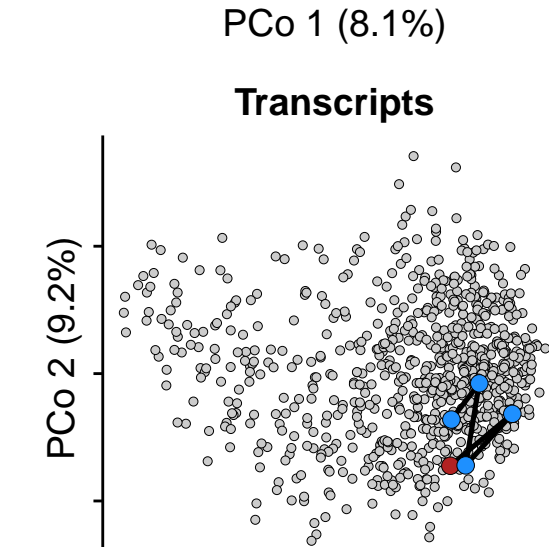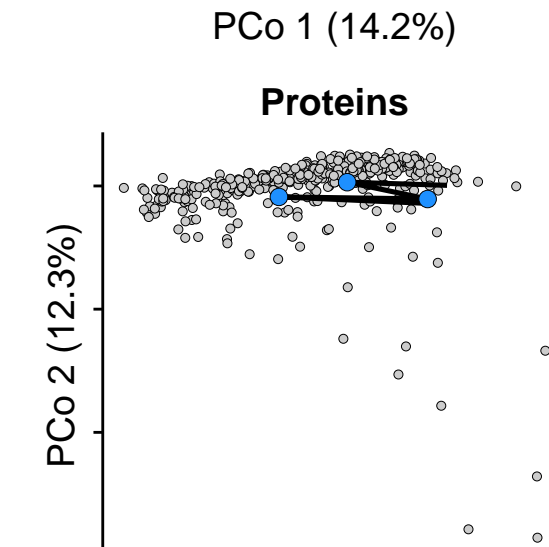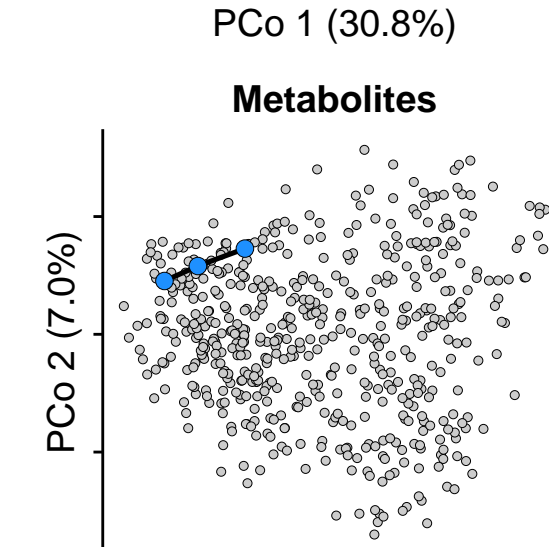



# H4030: 16 Male White Cincinnati | CD L1+L4

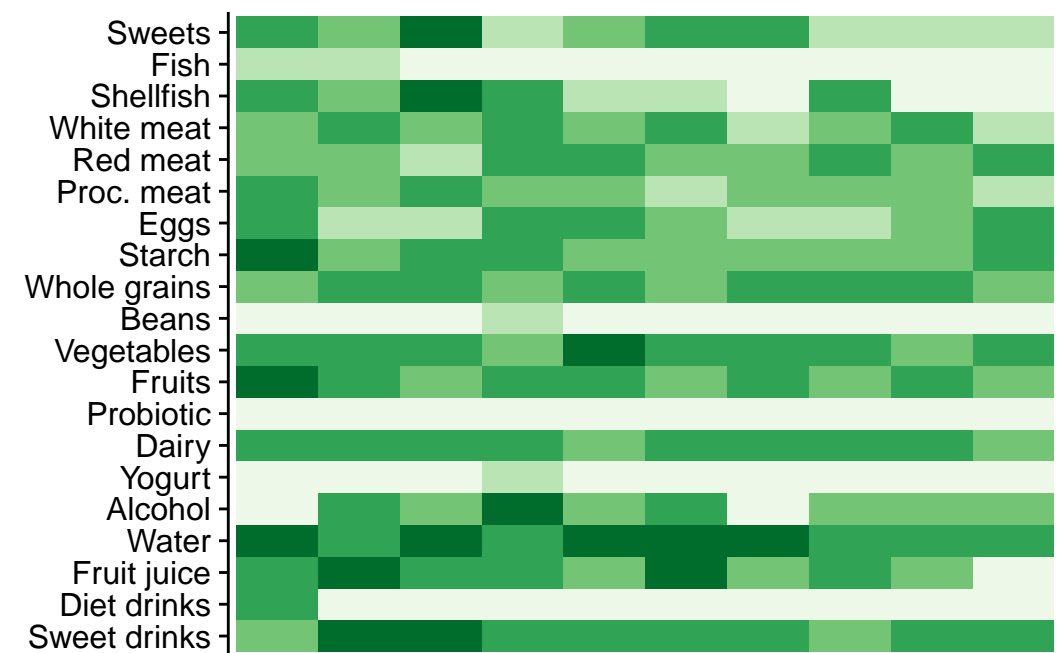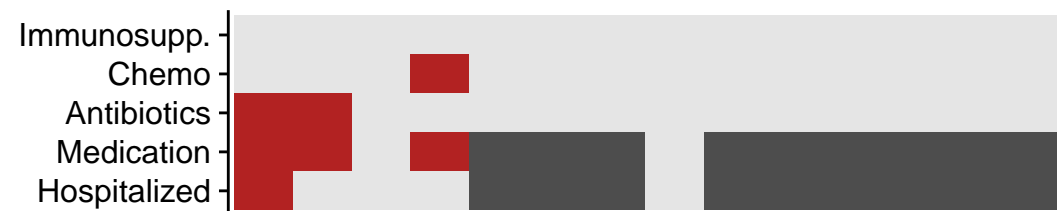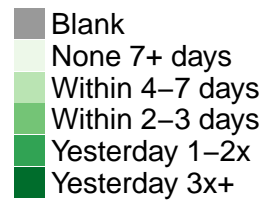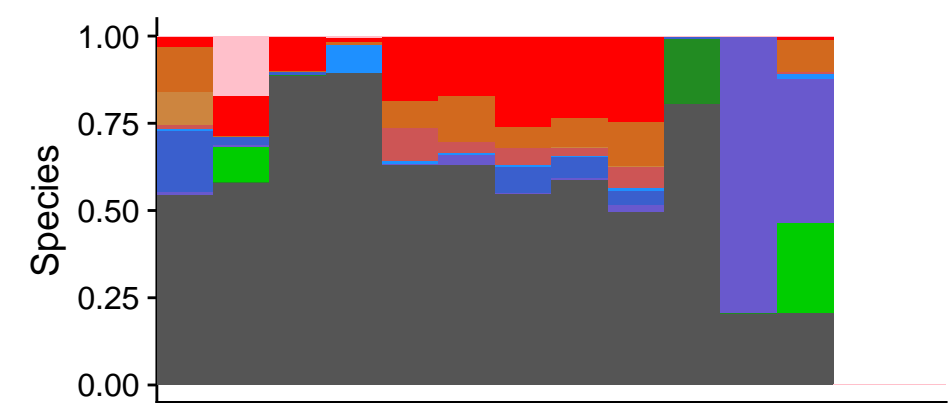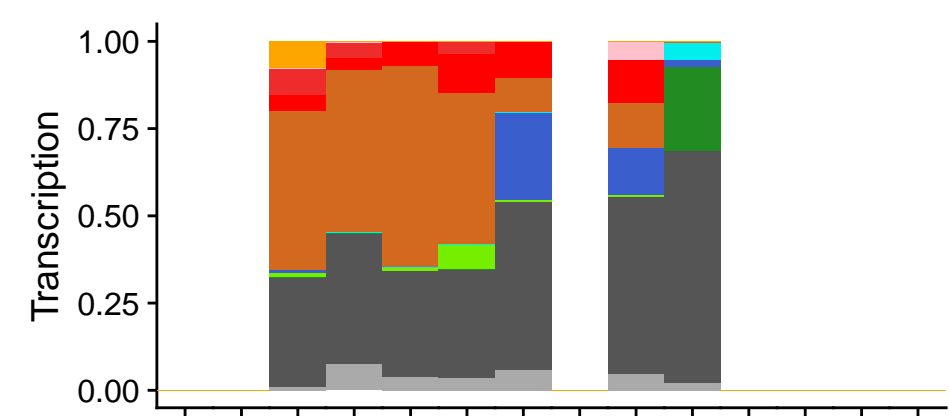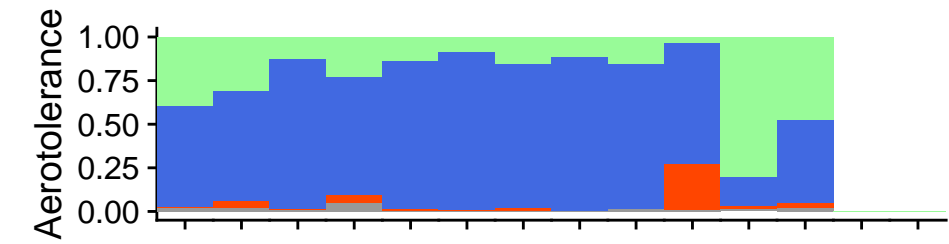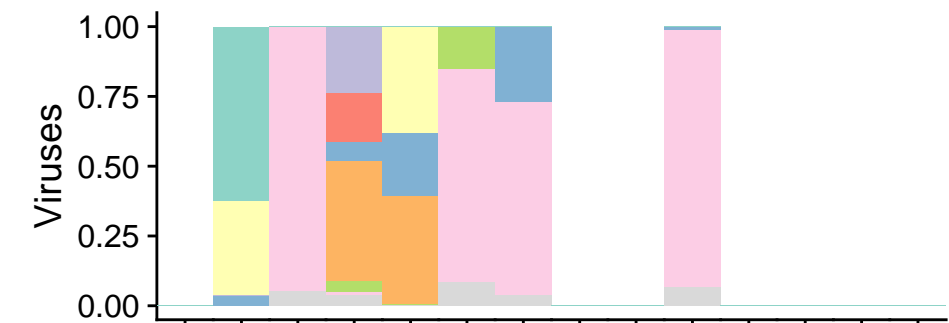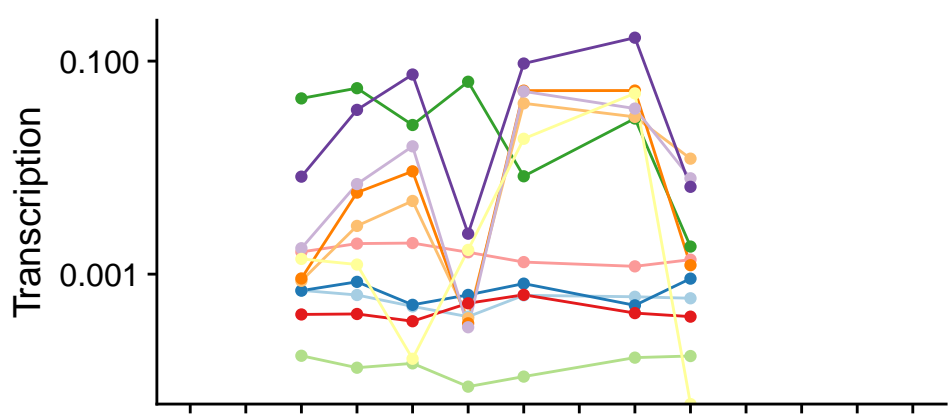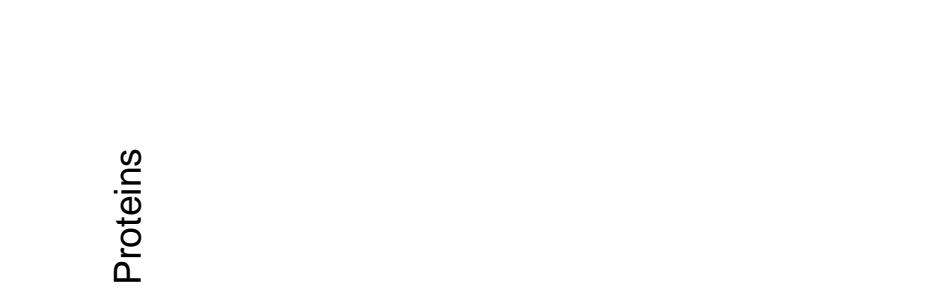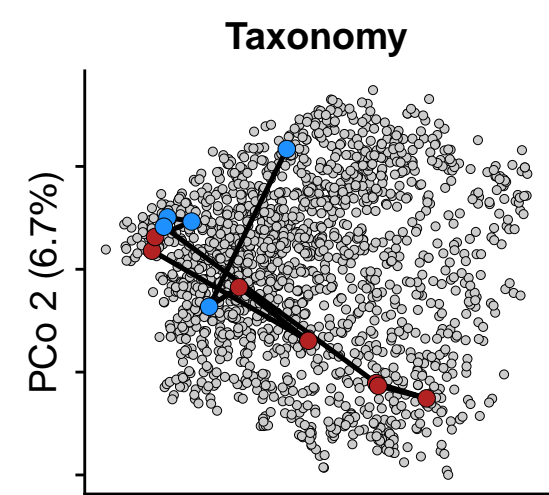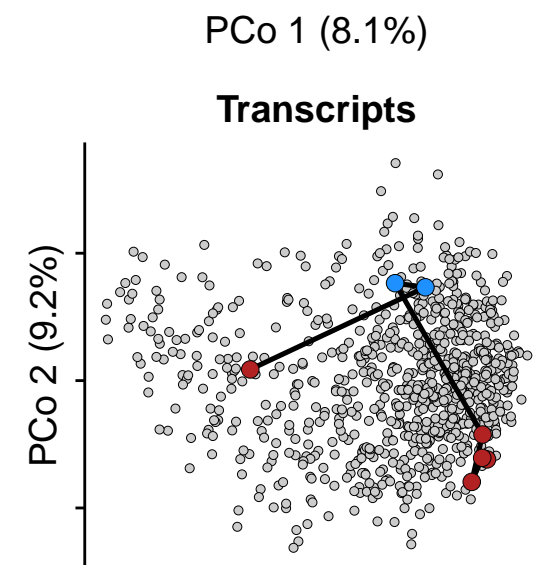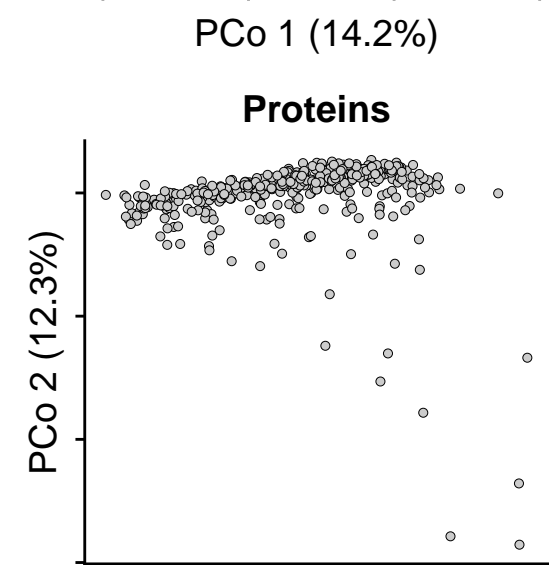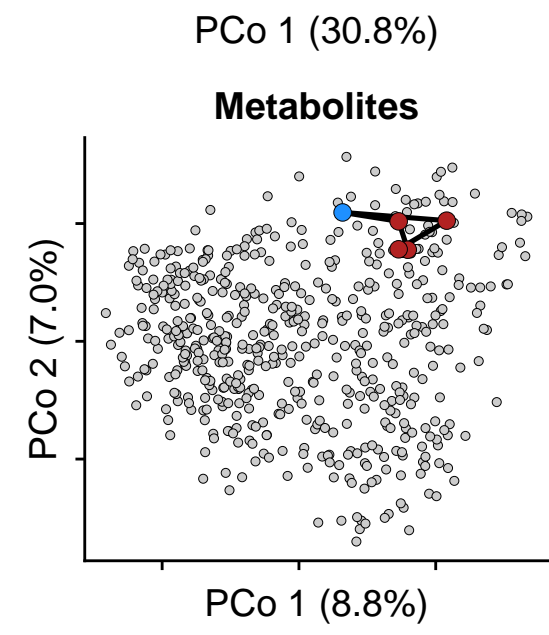

# H4031: 12 Male White Cincinnati | CD L1+L4

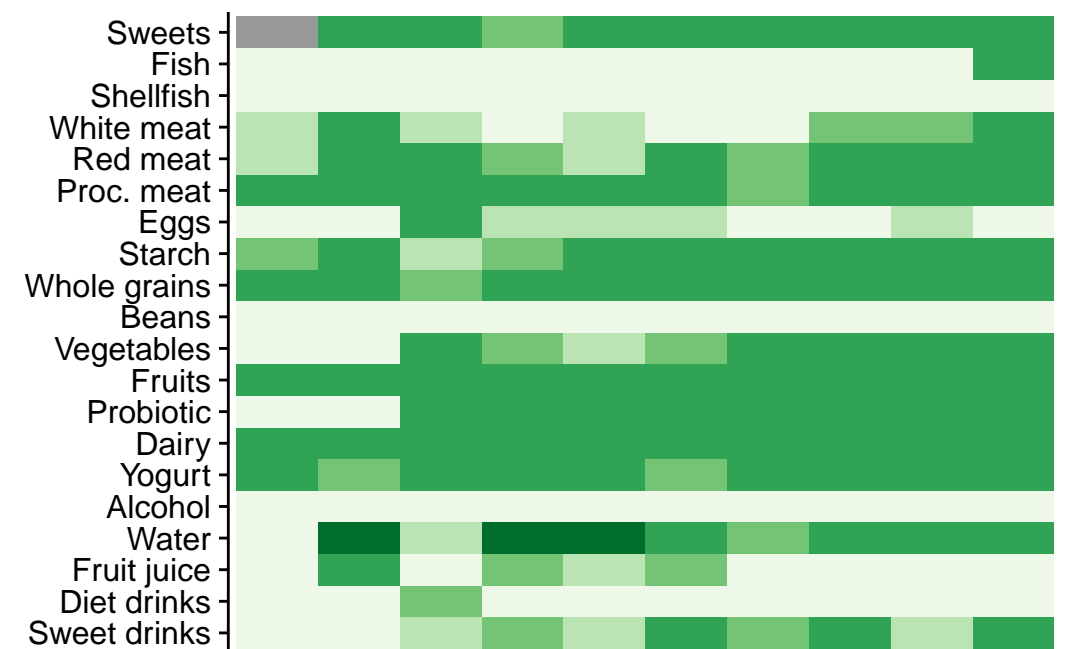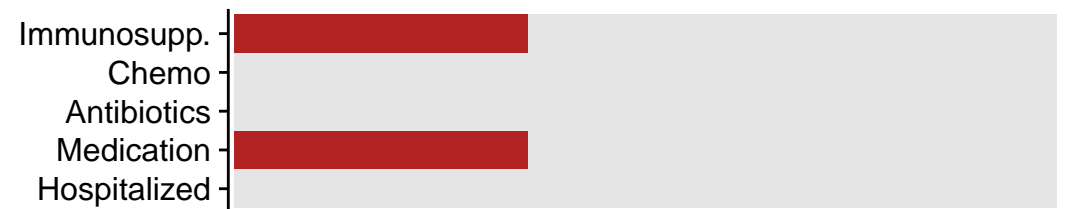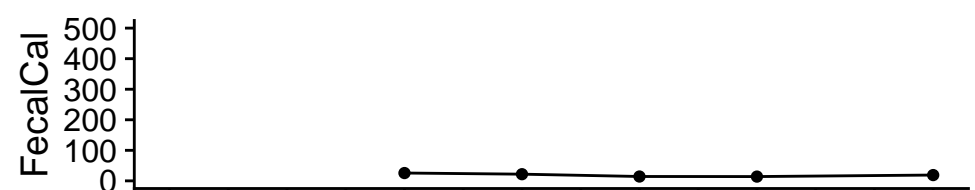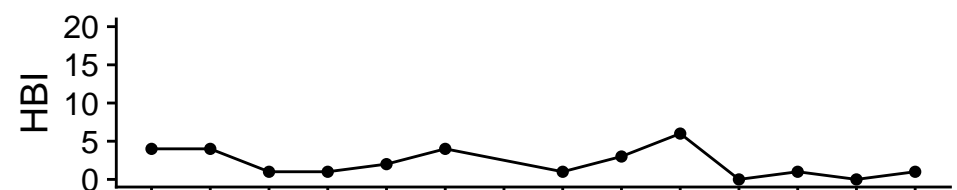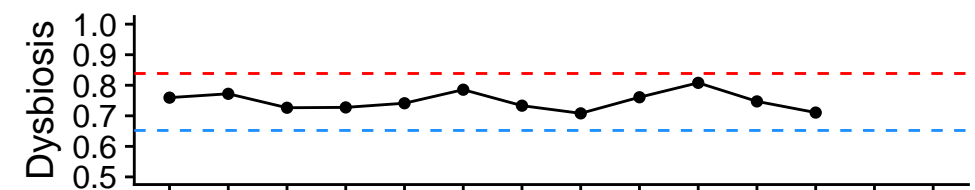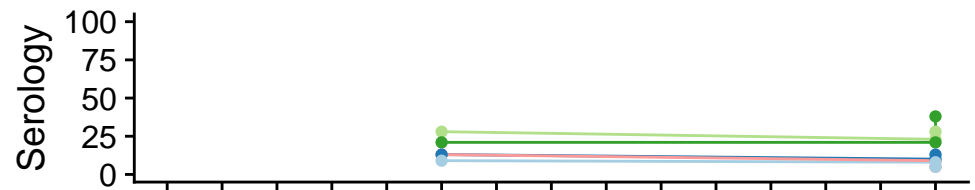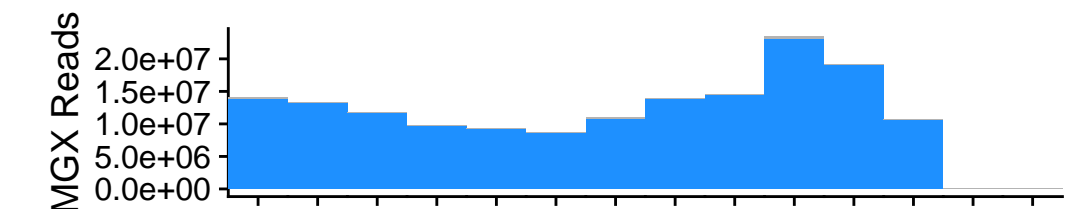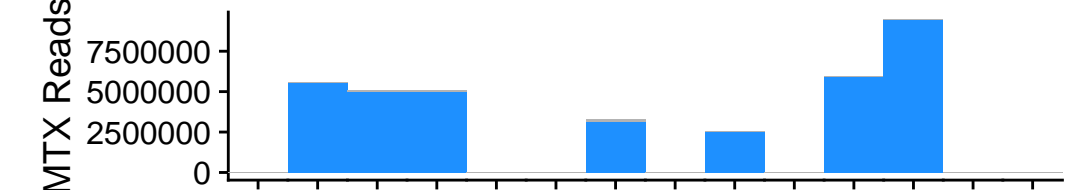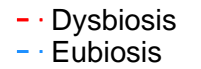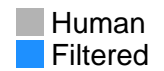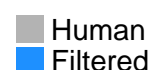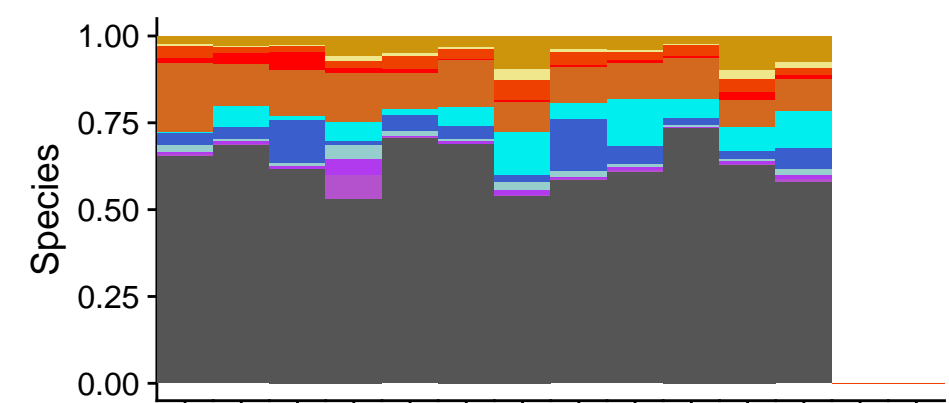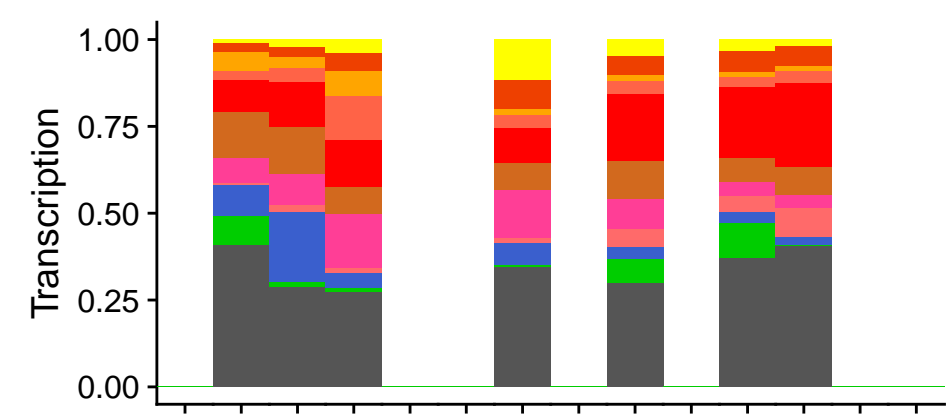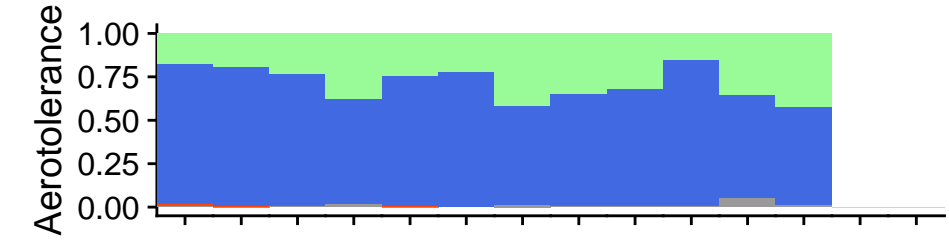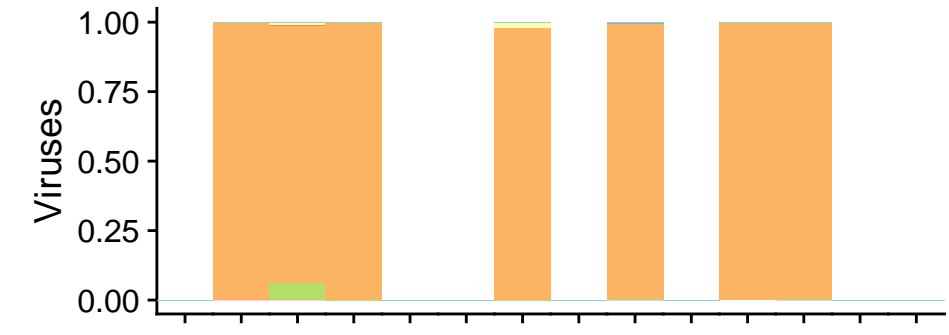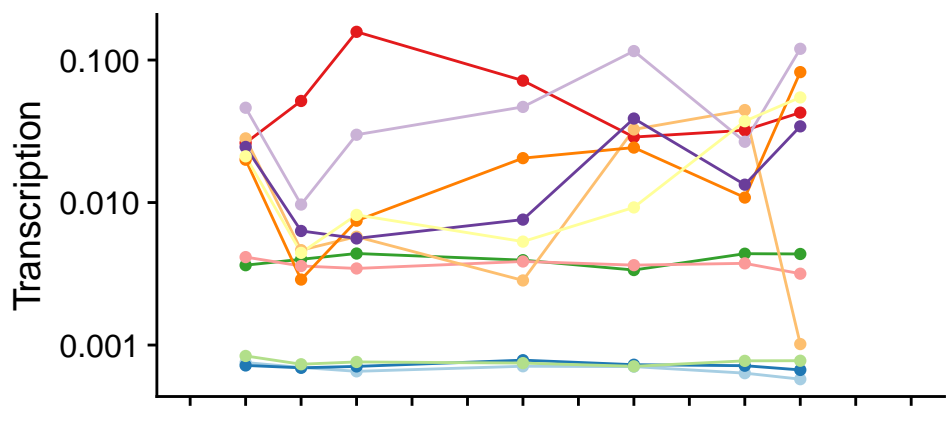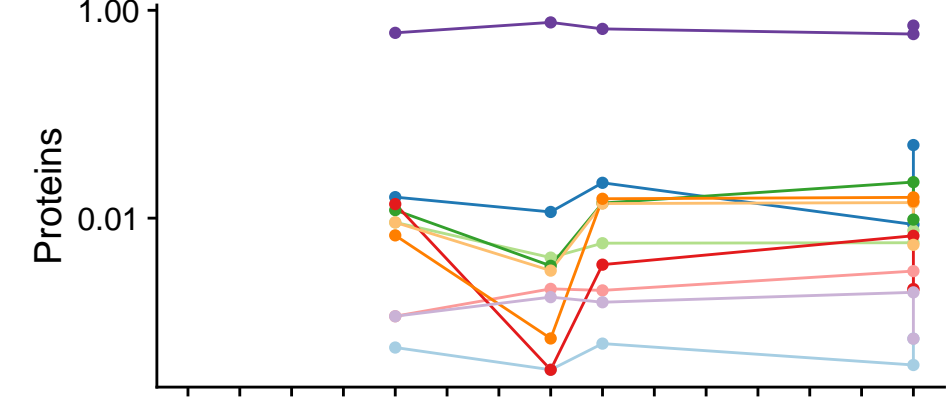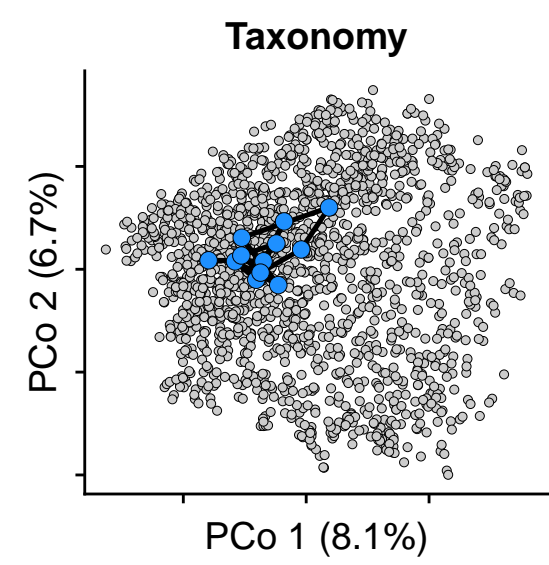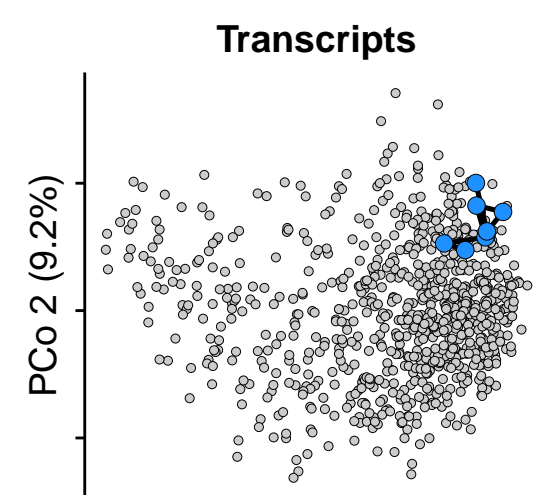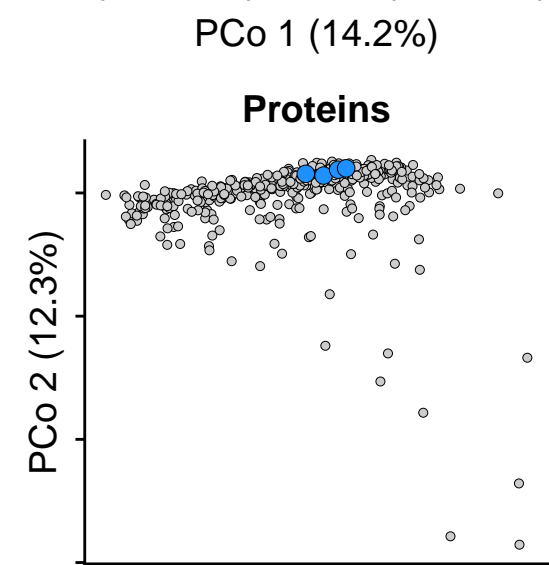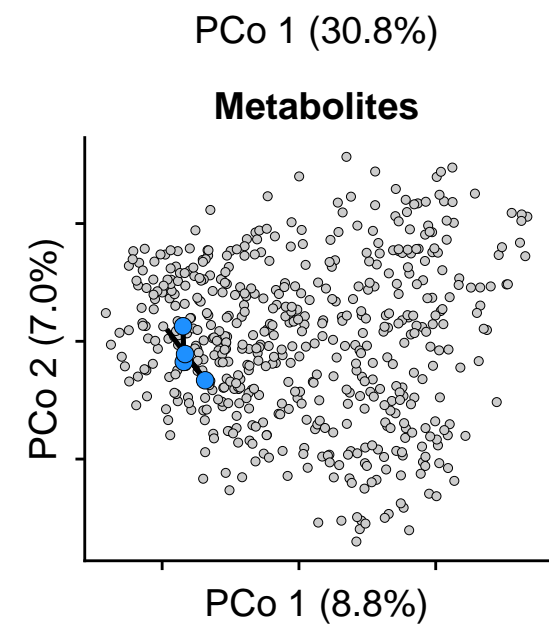

# H4032: 12 Male White Cincinnati | CD L3+L4

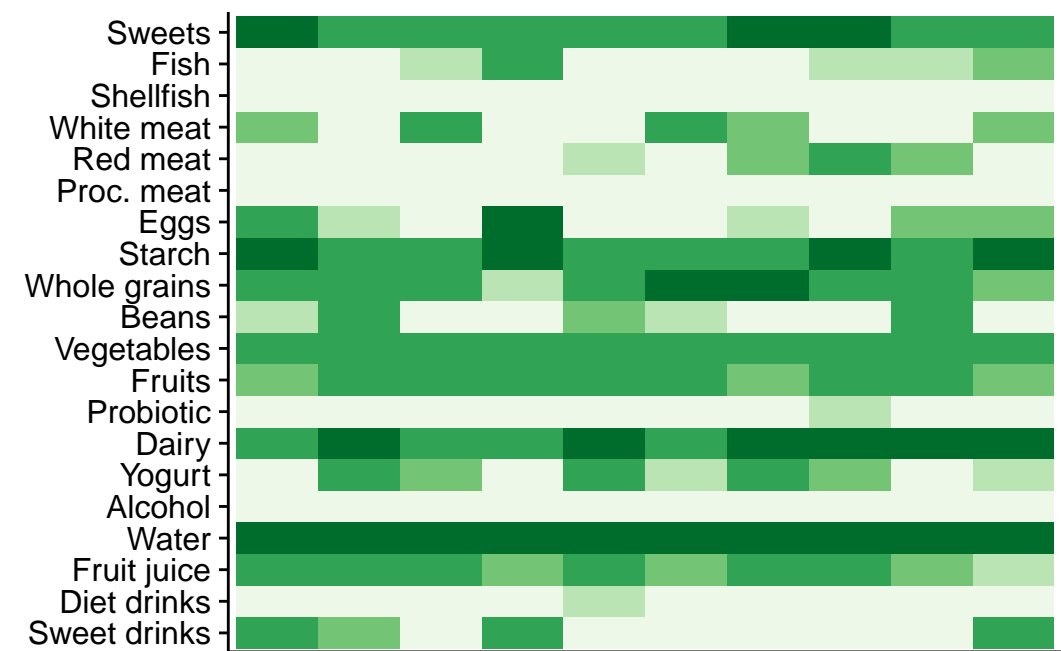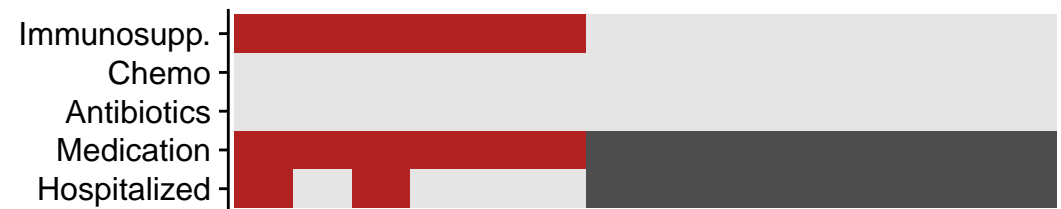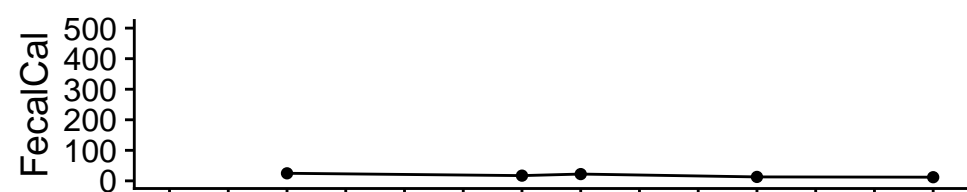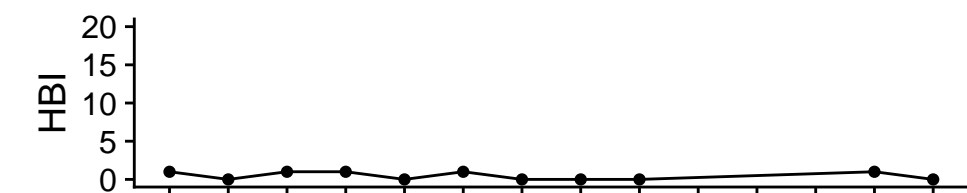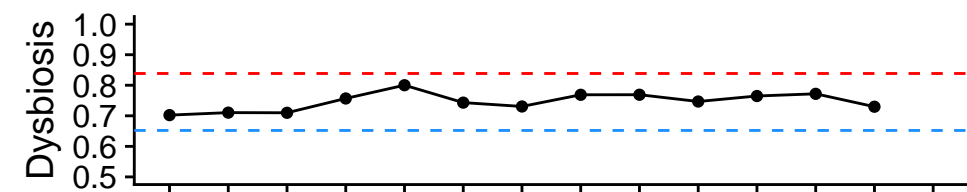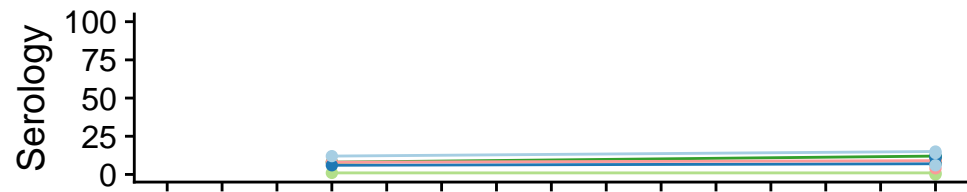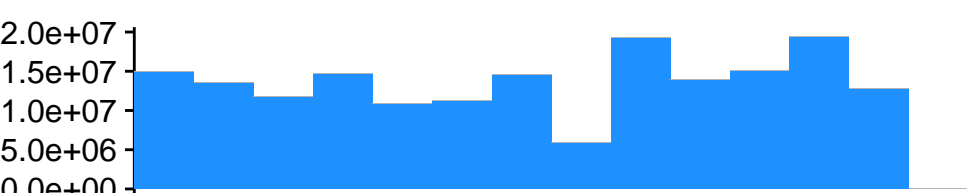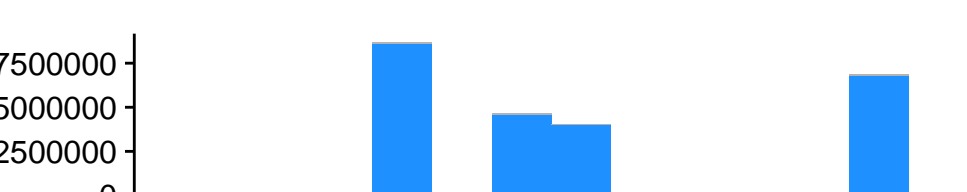

None 7+ days  
Within 4-7 days  
Within 2-3 days  
Yesterday 1-2x  
Yesterday 3x+

Yes  
No  
Blank

Dysbiosis  
Eubiosis

ANCA EU  
Cbir1 EU  
IgA ASCA EU  
IgG ASCA EU  
OmpC. EU

Human  
Filtered

Human  
Filtered

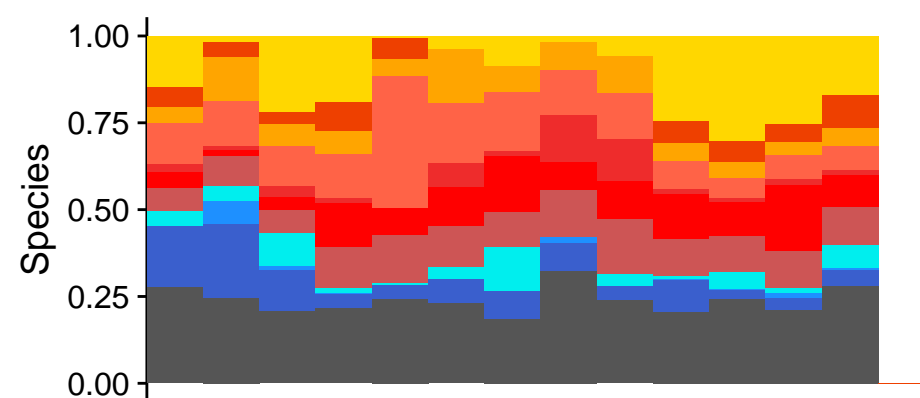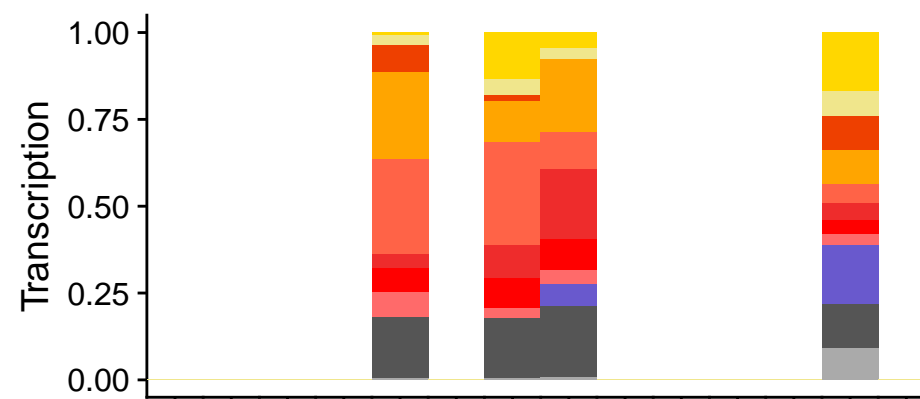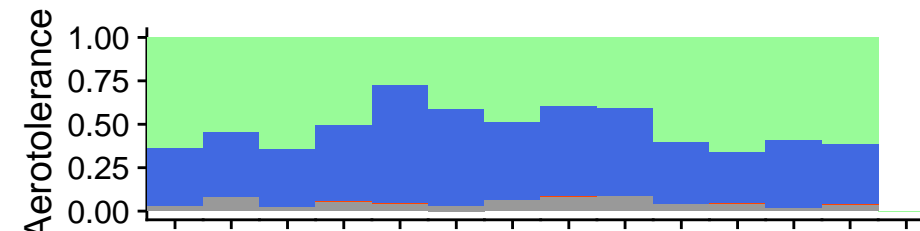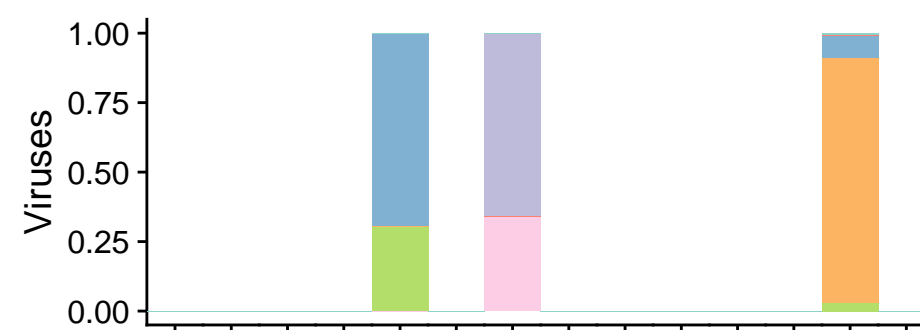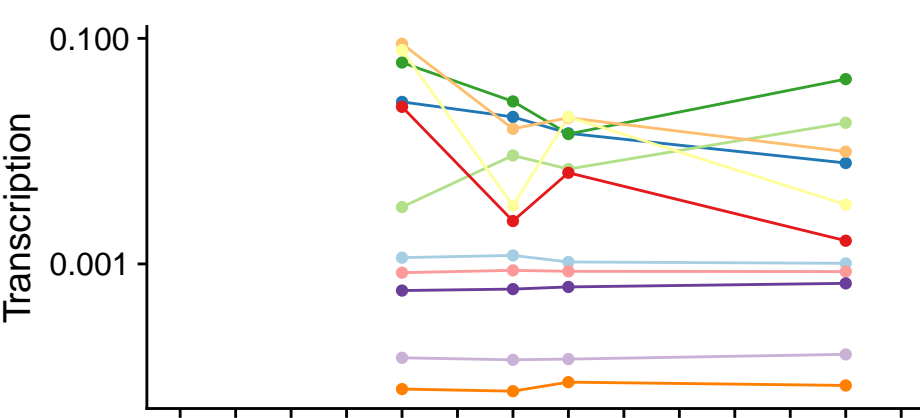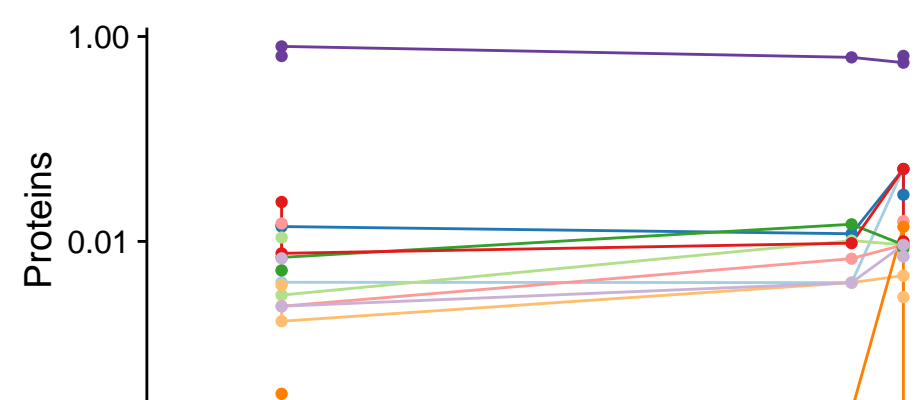

Alistipes onderdonkii  
Bacteroides caccae  
Bacteroides dorei  
Bacteroides ovatus  
Bacteroides thetaiotaomicron  
Bacteroides uniformis  
Parabacteroides merdae  
Eubacterium rectale  
Eubacterium eligens  
Faecalibacterium prausnitzii  
other

Alistipes onderdonkii  
Alistipes finegoldii  
Bacteroides caccae  
Bacteroides dorei  
Bacteroides ovatus  
Bacteroides thetaiotaomicron  
Bacteroides uniformis  
Parabacteroides distasonis  
Roseburia intestinalis  
other  
unclassified

obligate anaerobe  
aerotolerant  
facultative anaerobe  
unknown

Pseudomonas phage phiIBB-PF7A  
Siphoviridae  
Lactococcus phage 936 sensu lato  
unclassified Siphoviridae  
Gokushovirus WZ-2015a  
Bell pepper mottle virus  
Pepper mild mottle virus  
Tomato mosaic virus

K00793: riboflavin synthase [EC:2.5.1.9]  
K02914: large subunit ribosomal protein L34  
K02956: small subunit ribosomal protein S15  
K03088: RNA polymerase sigma-70 factor, E...  
K03797: carboxyl-terminal processing protea...  
K04077: chaperonin GroEL  
K04078: chaperonin GroES  
K07263: zinc protease  
K09702: hypothetical protein  
K09748: hypothetical protein  
K13993: HSP20 family protein

K00134: glyceraldehyde 3-phosphate dehydr...  
K00262: glutamate dehydrogenase (NADP+) ...  
K01006: pyruvate, orthophosphate dikinase [...]  
K01610: phosphoenolpyruvate carboxykinase...  
K02355: elongation factor EF-G  
K02358: elongation factor EF-Tu  
K02986: small subunit ribosomal protein S4  
K07335: basic membrane protein A and relat...  
K10200: N-acetylglucosamine transport syst...  
UNGROUPED

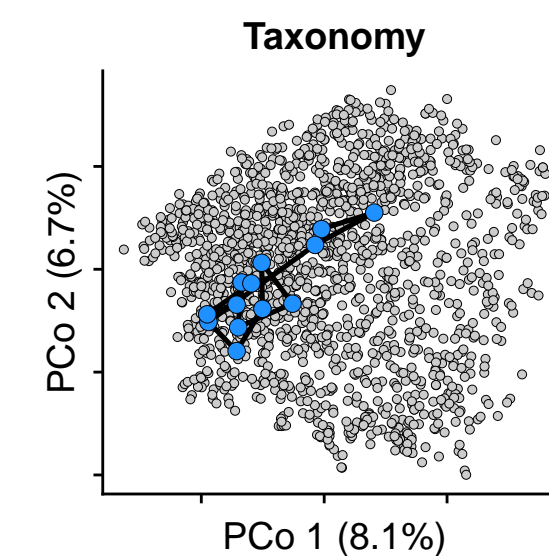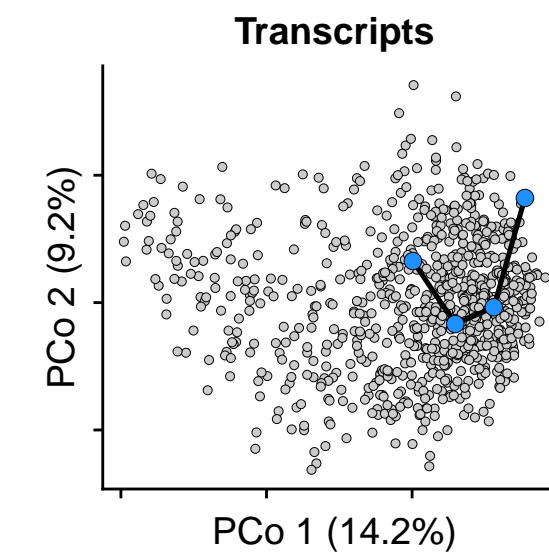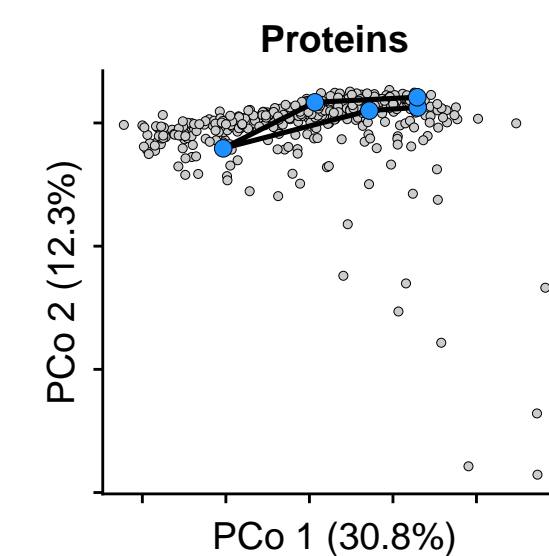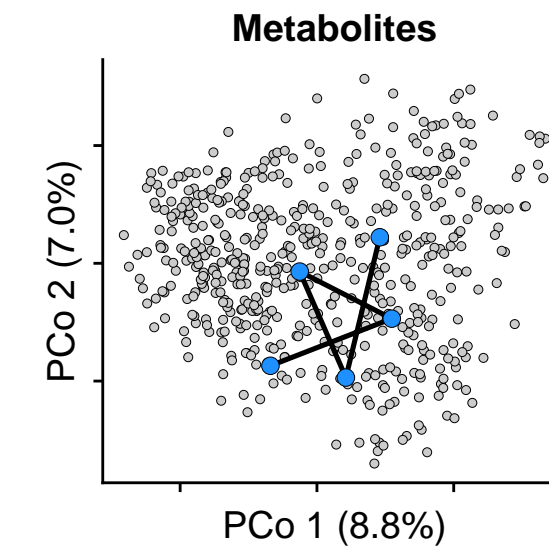

# H4035: 16 Male White Cincinnati | UC

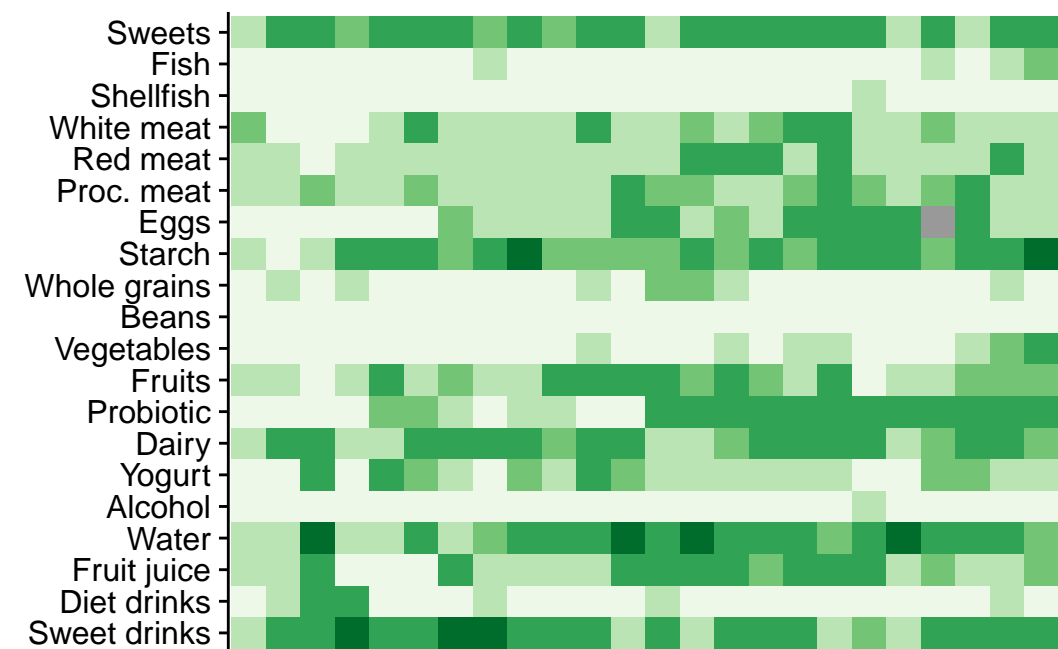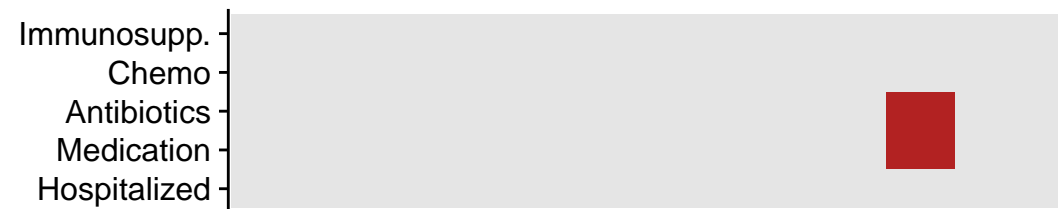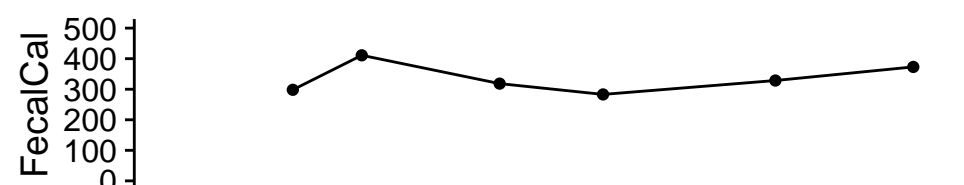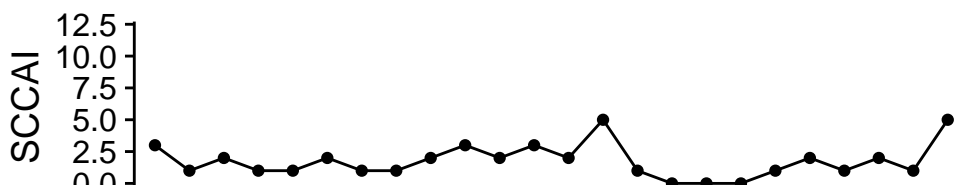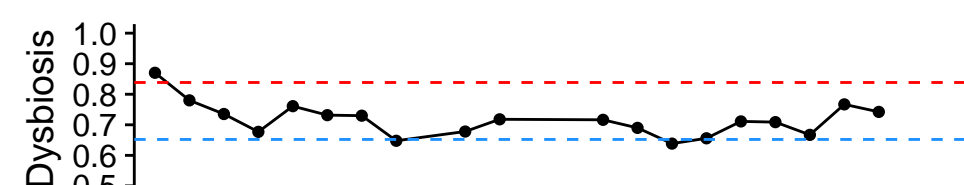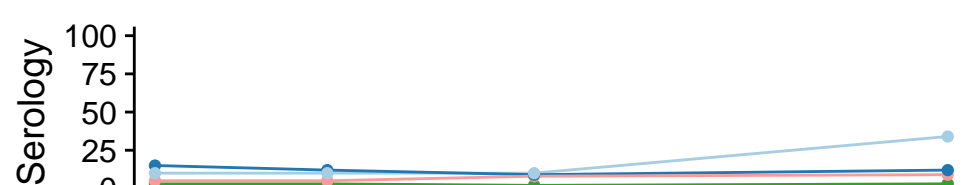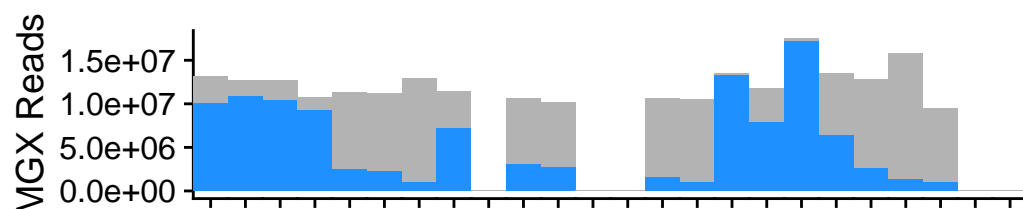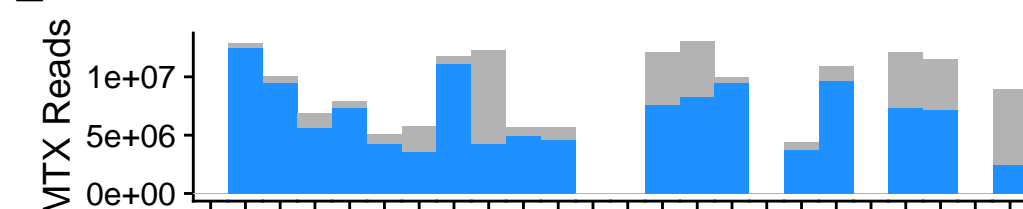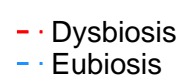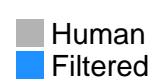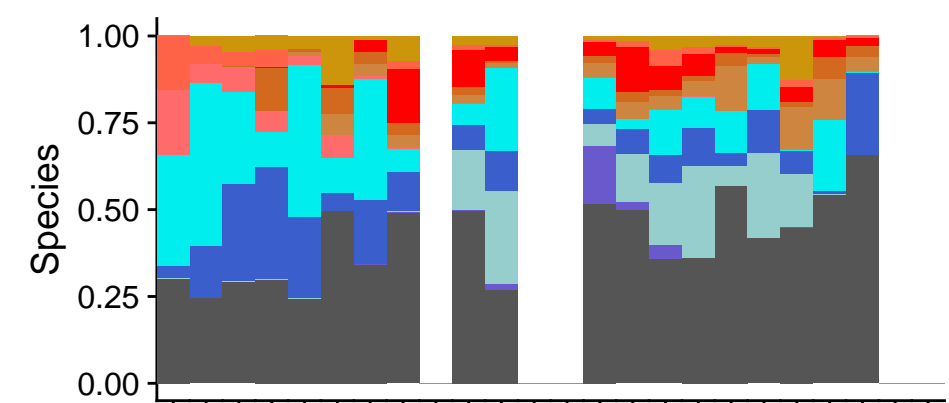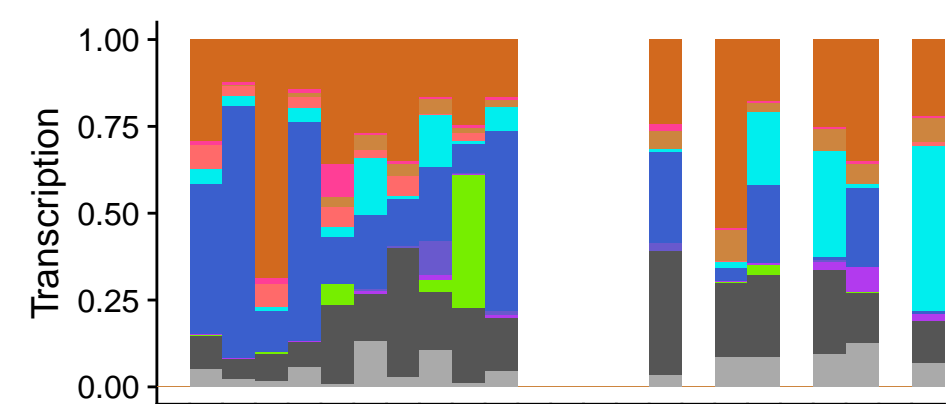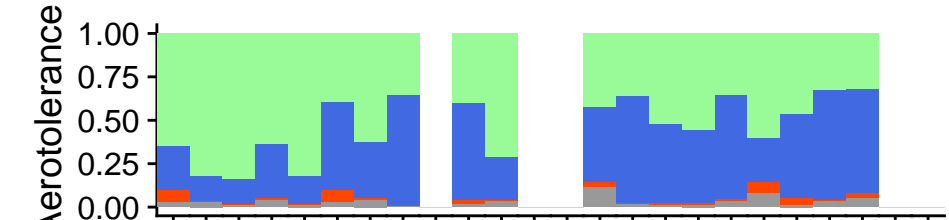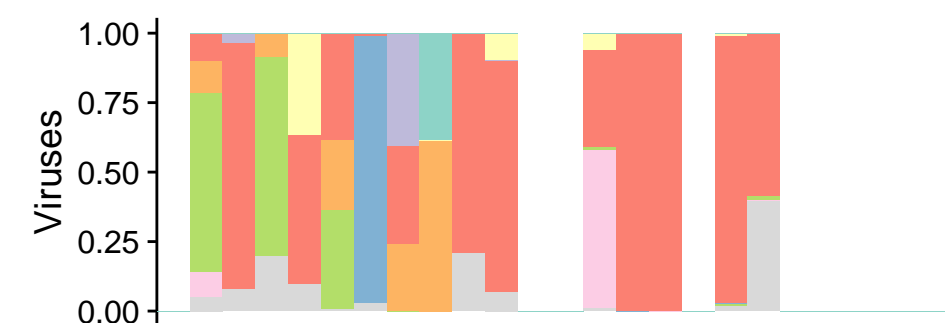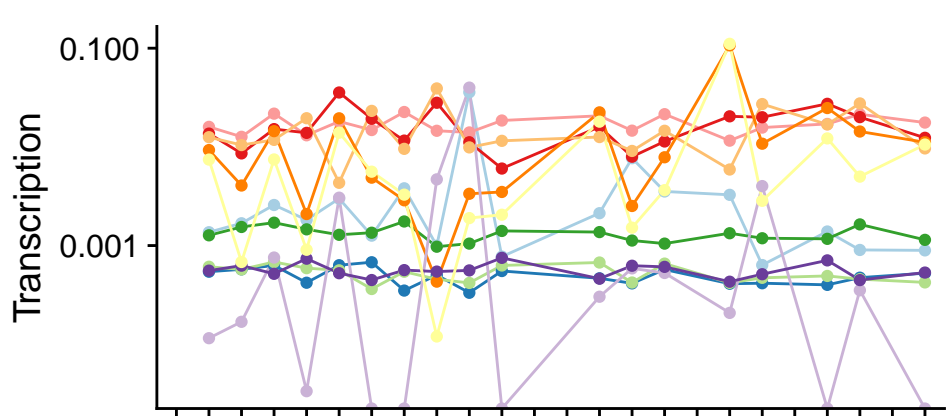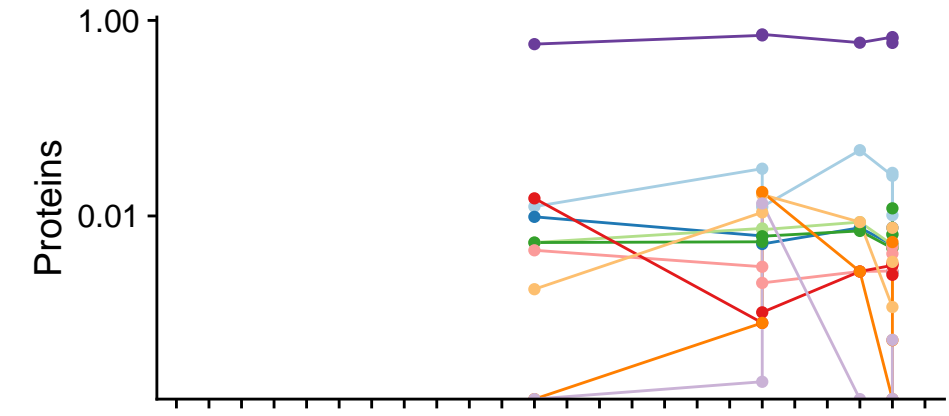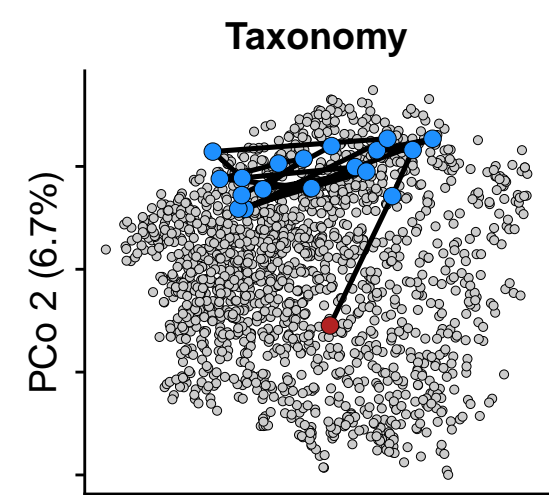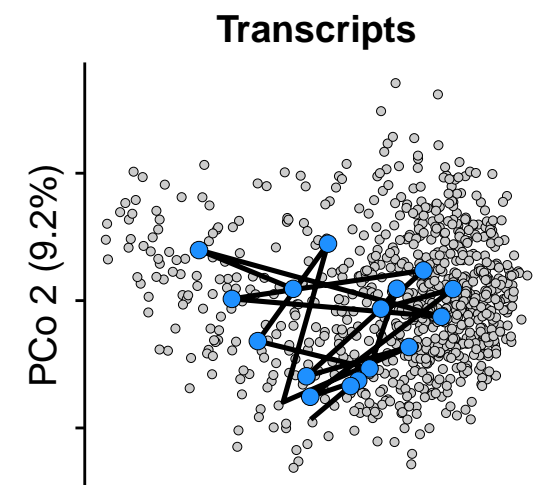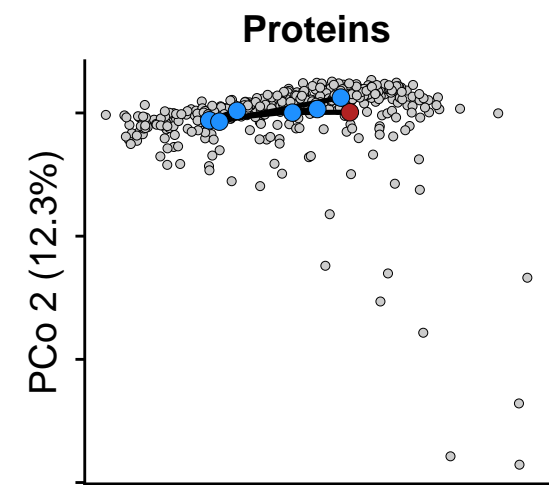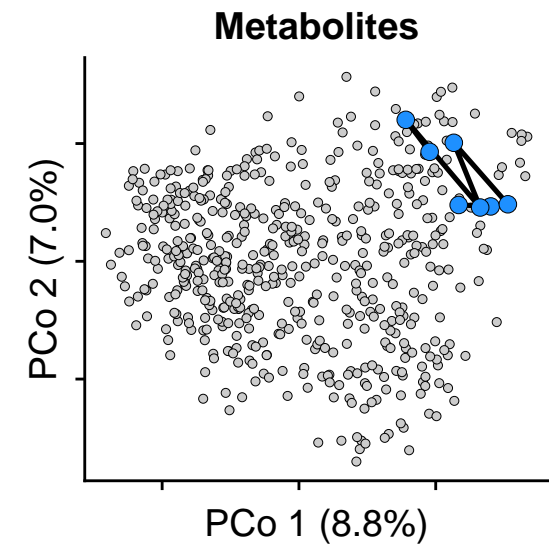

# H4038: 15 Male White Cincinnati | CD L3

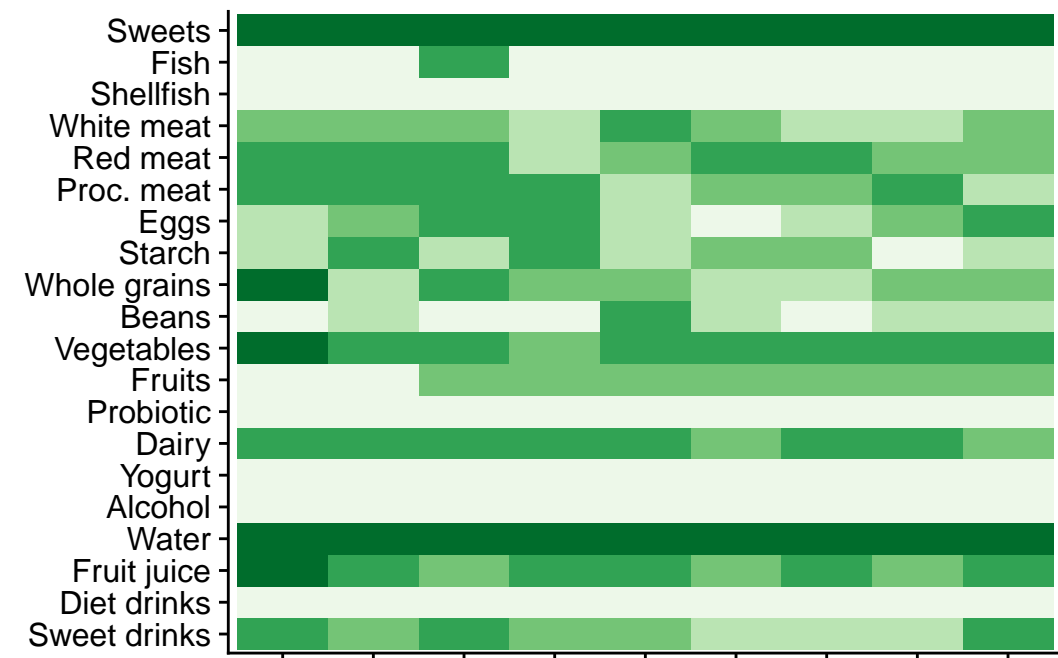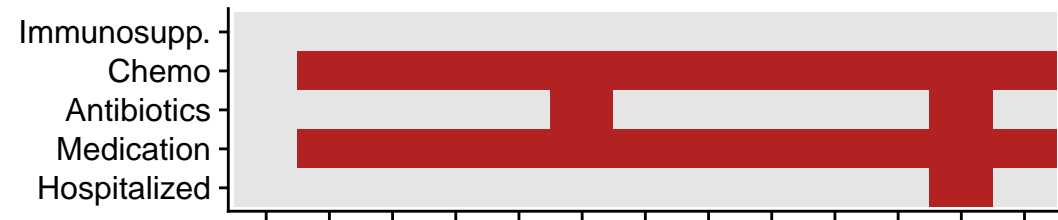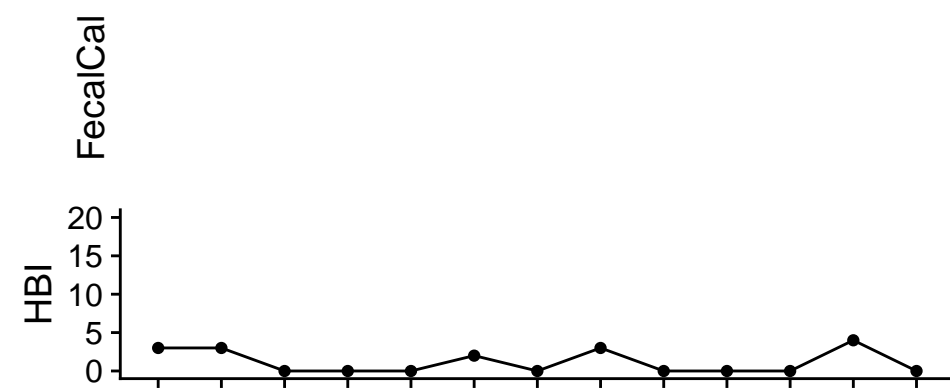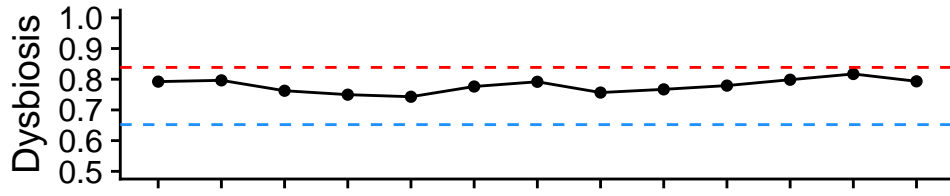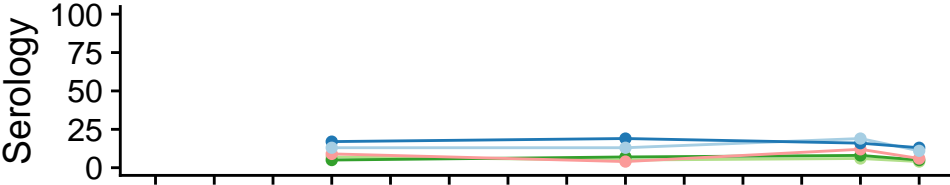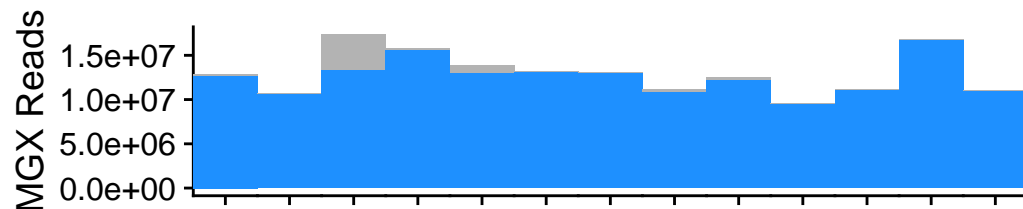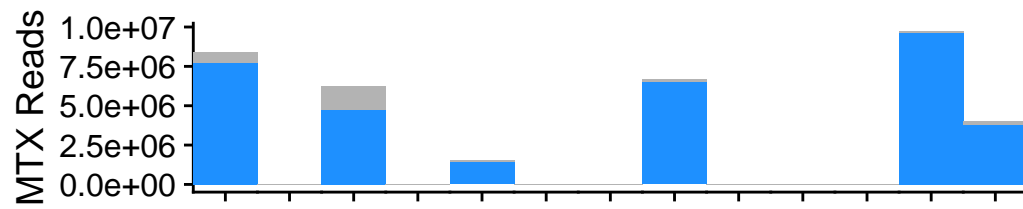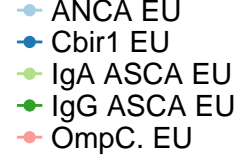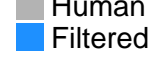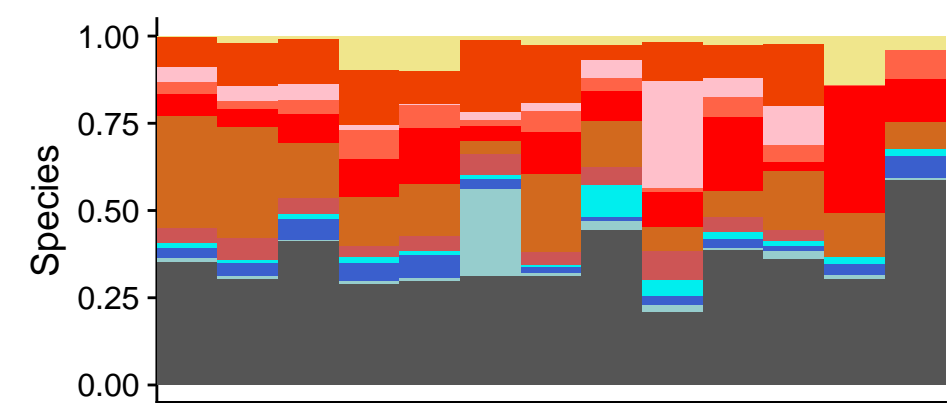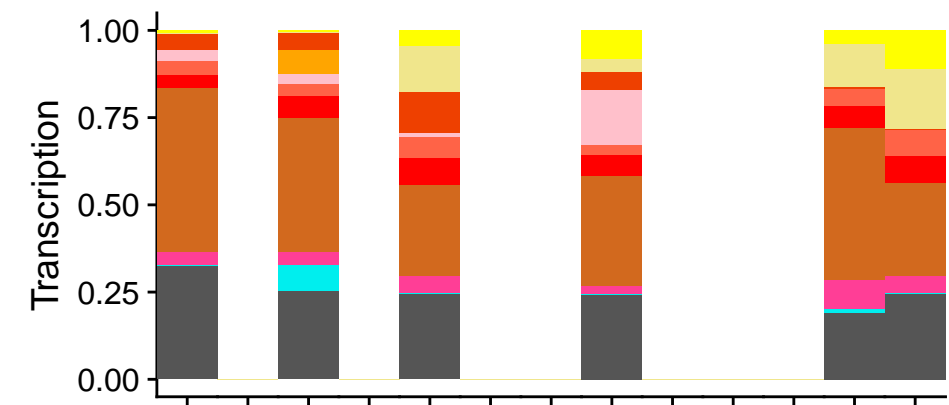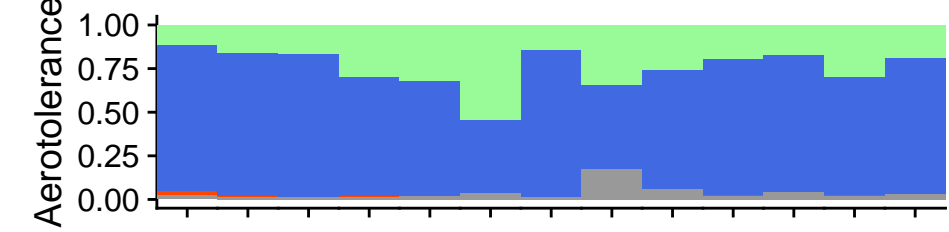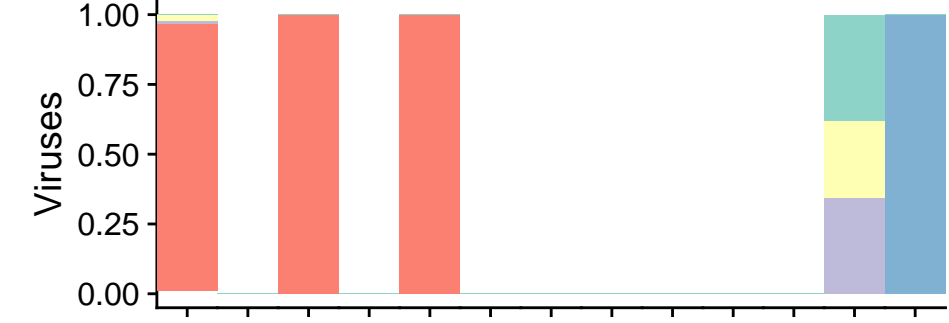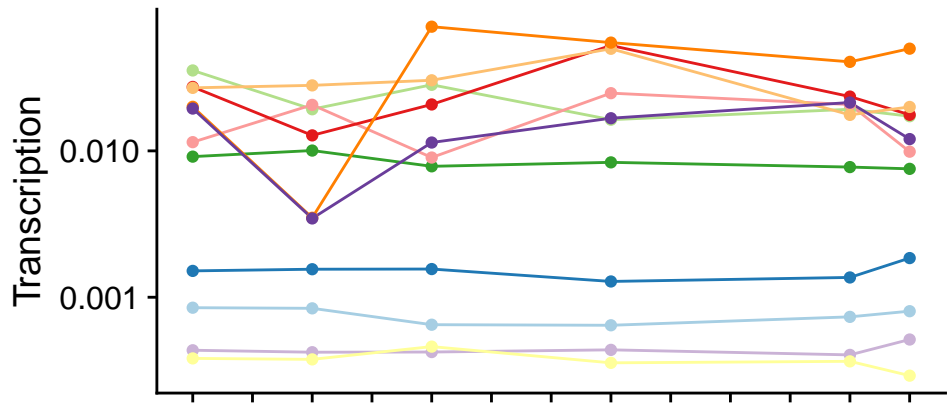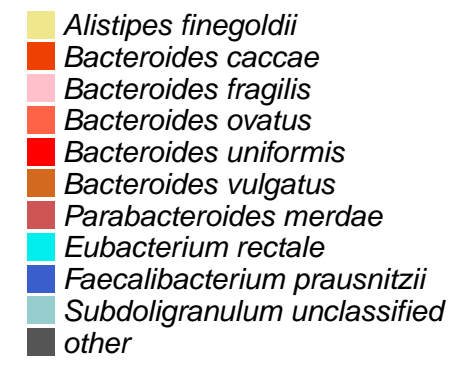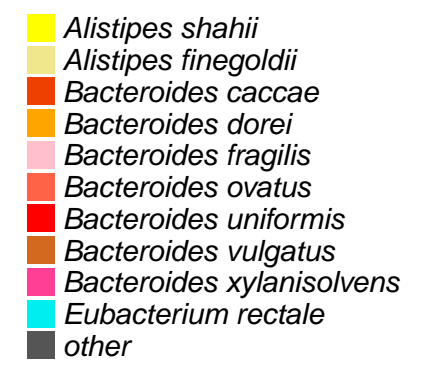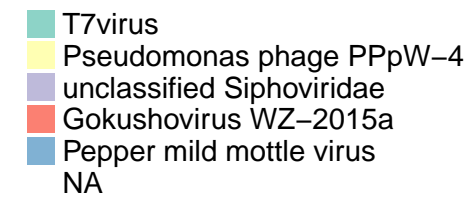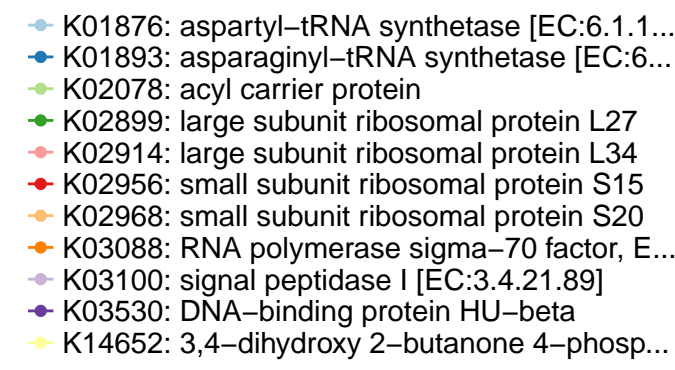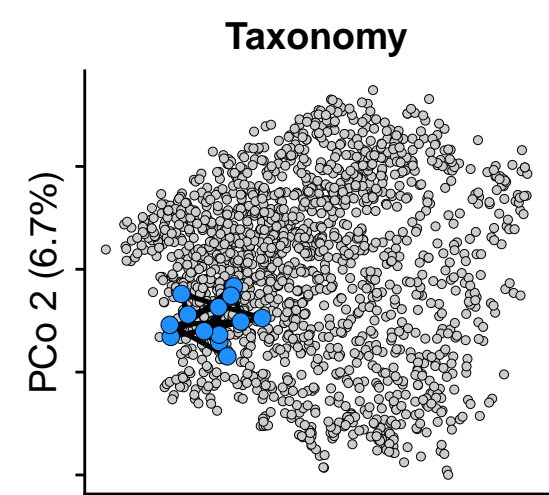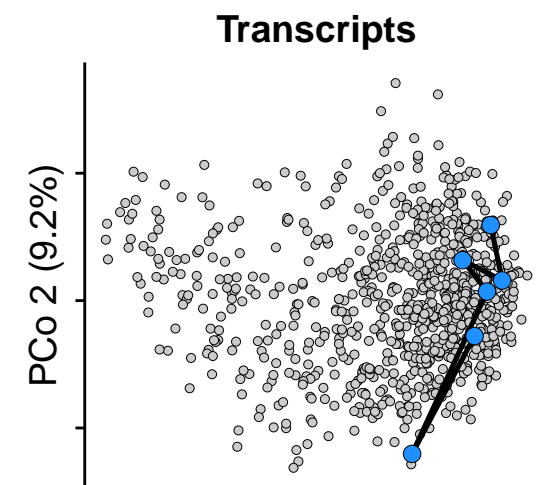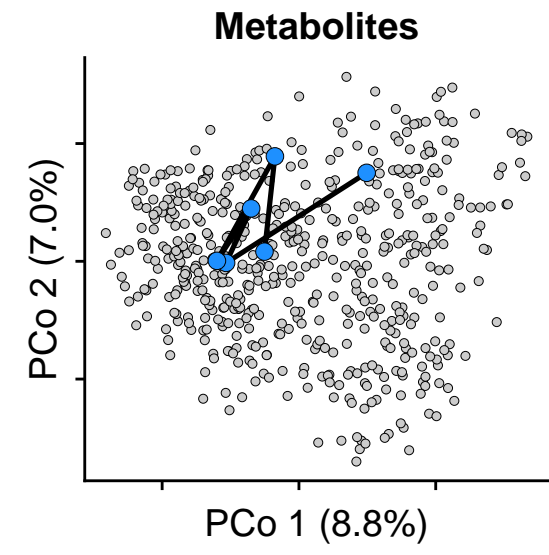

# H4039: 12 Female White Cincinnati | CD L3

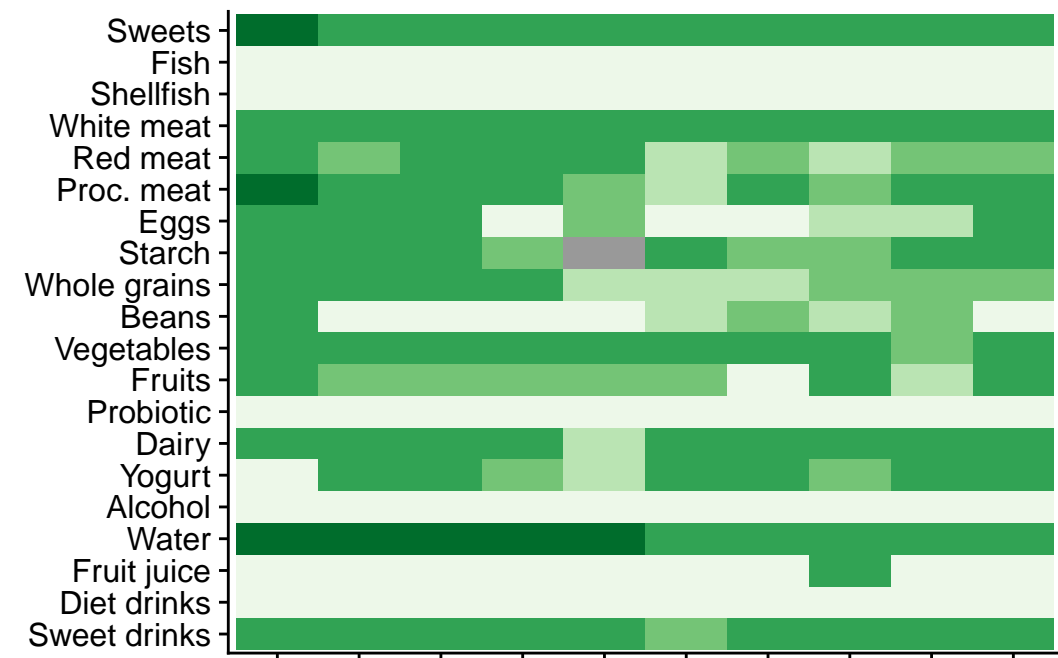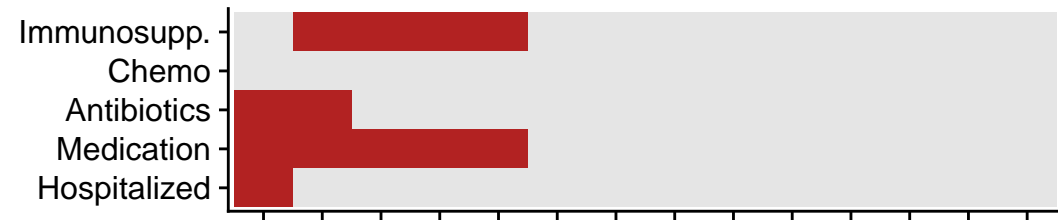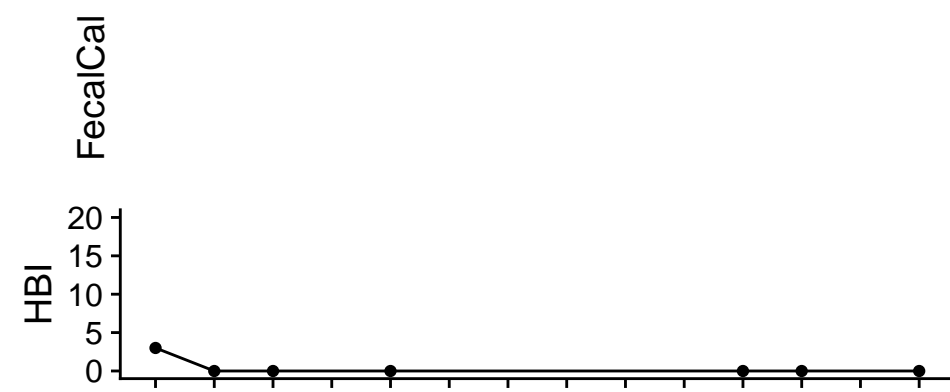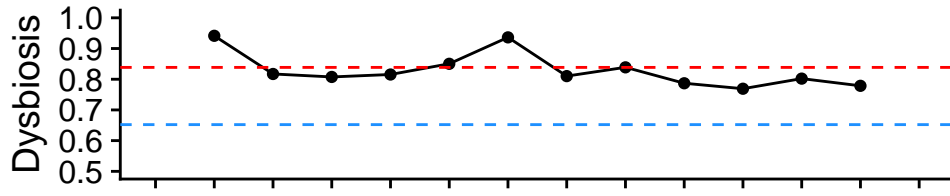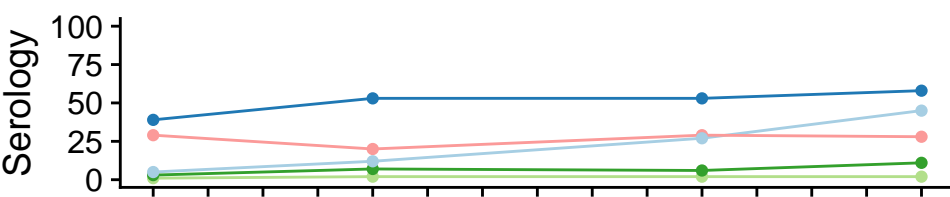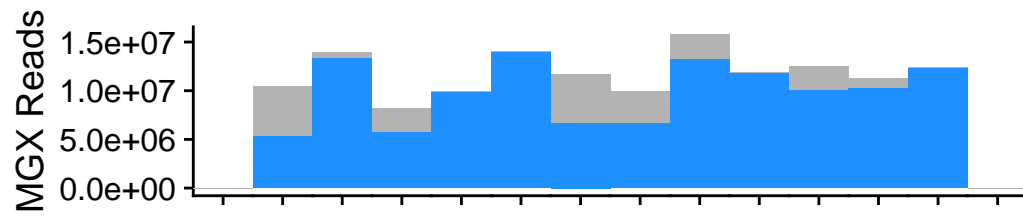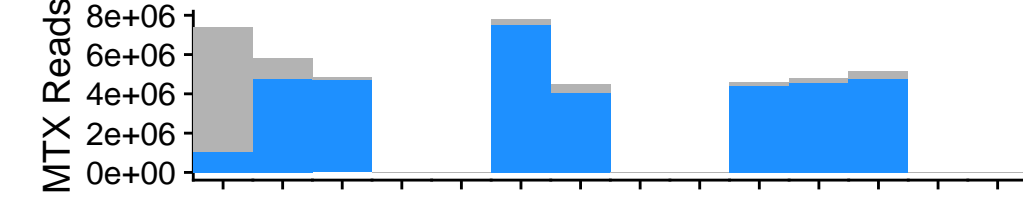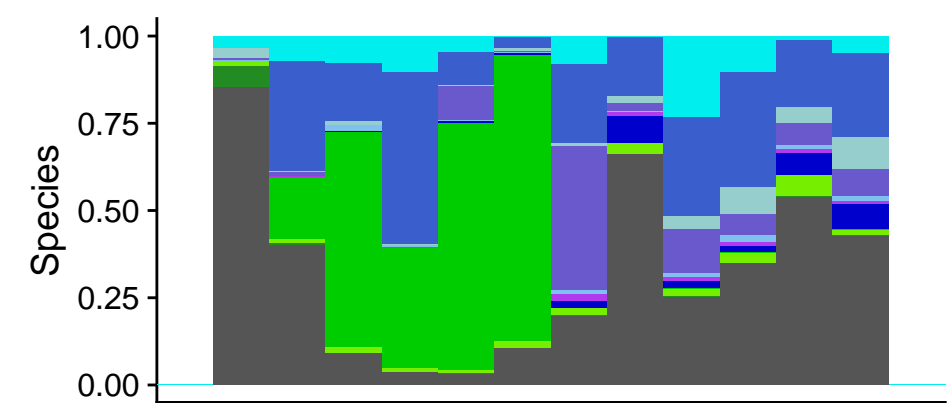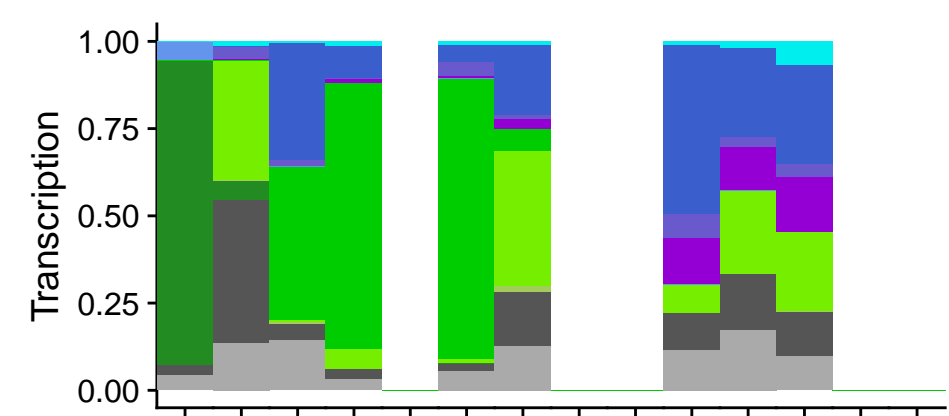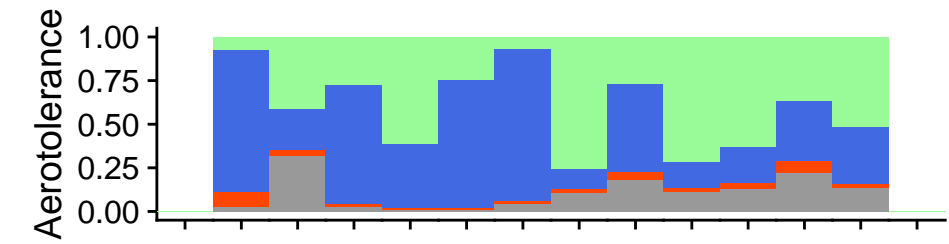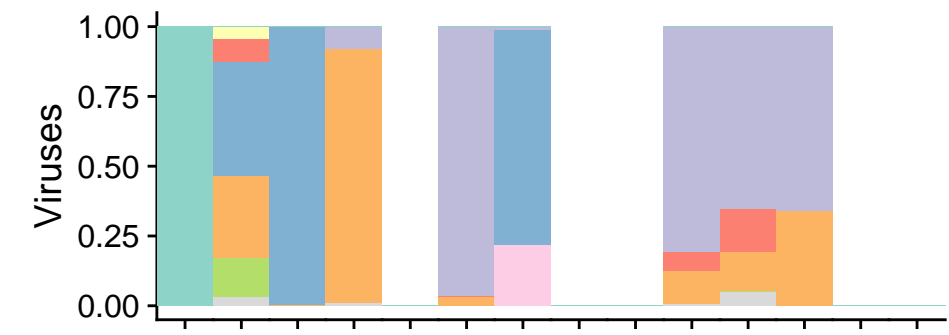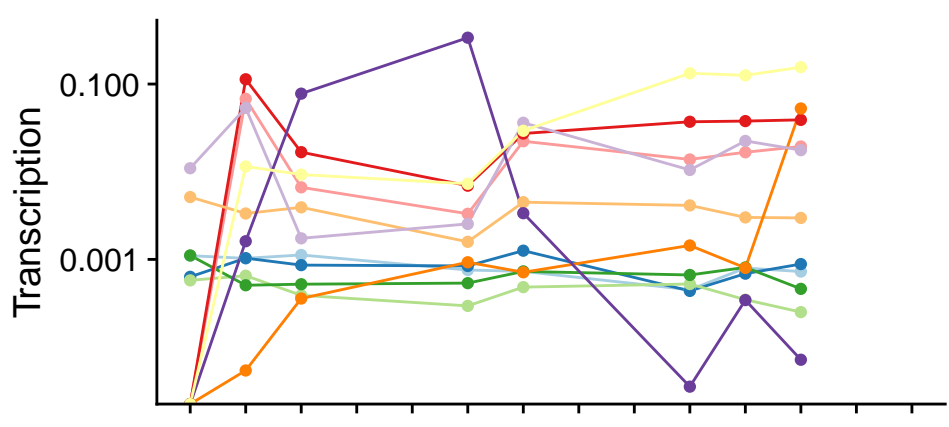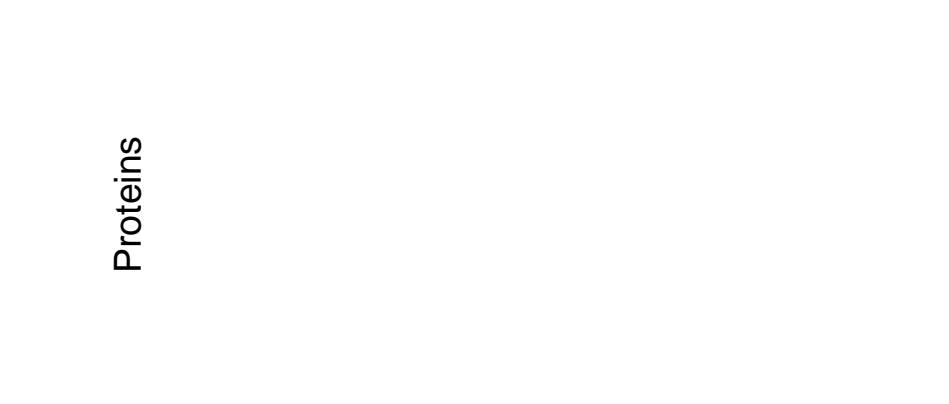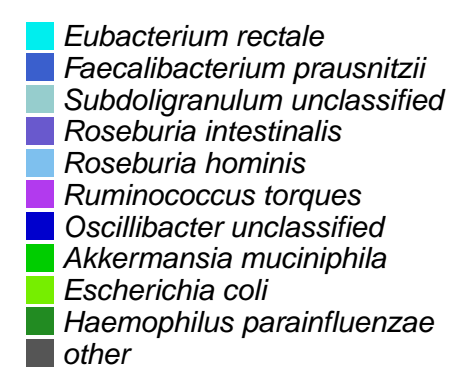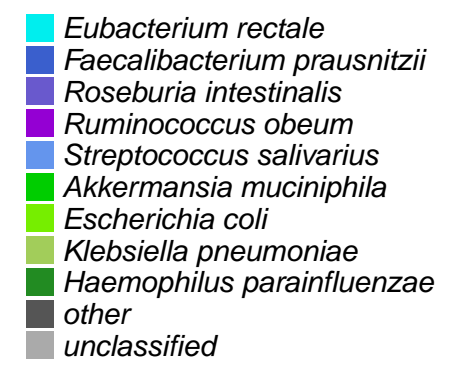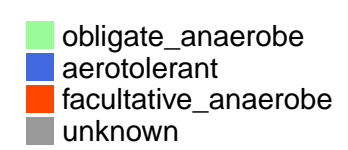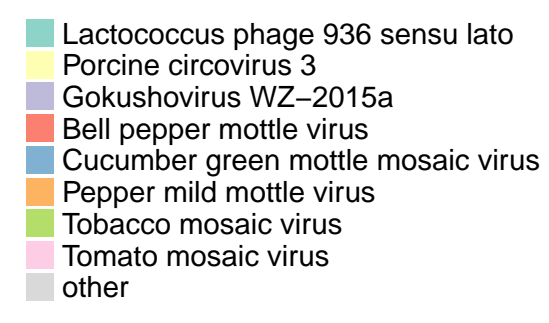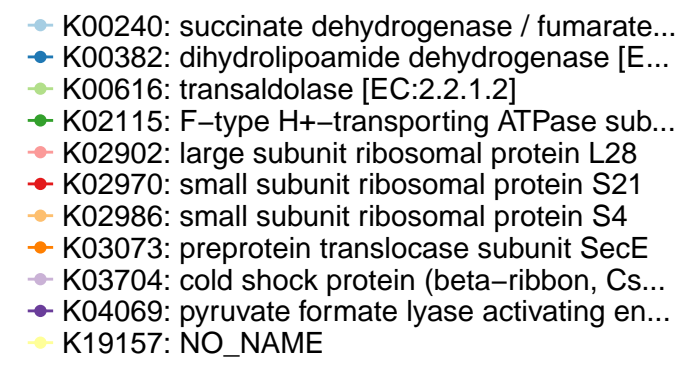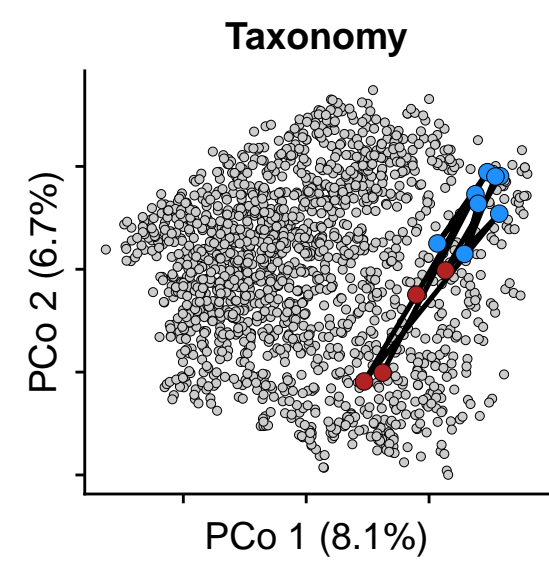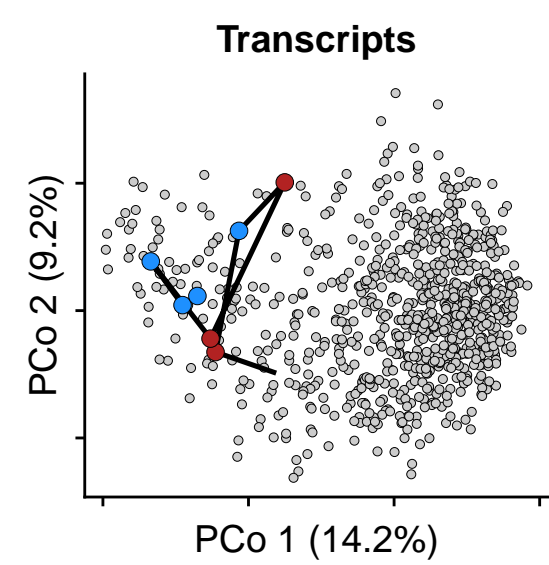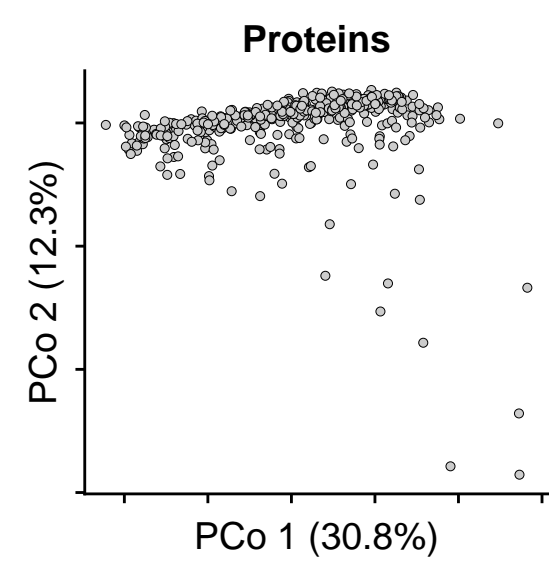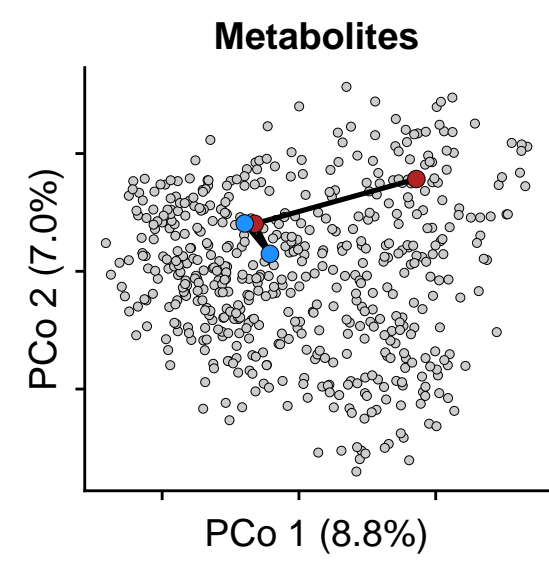

# H4040: 17 Female White Cincinnati | UC

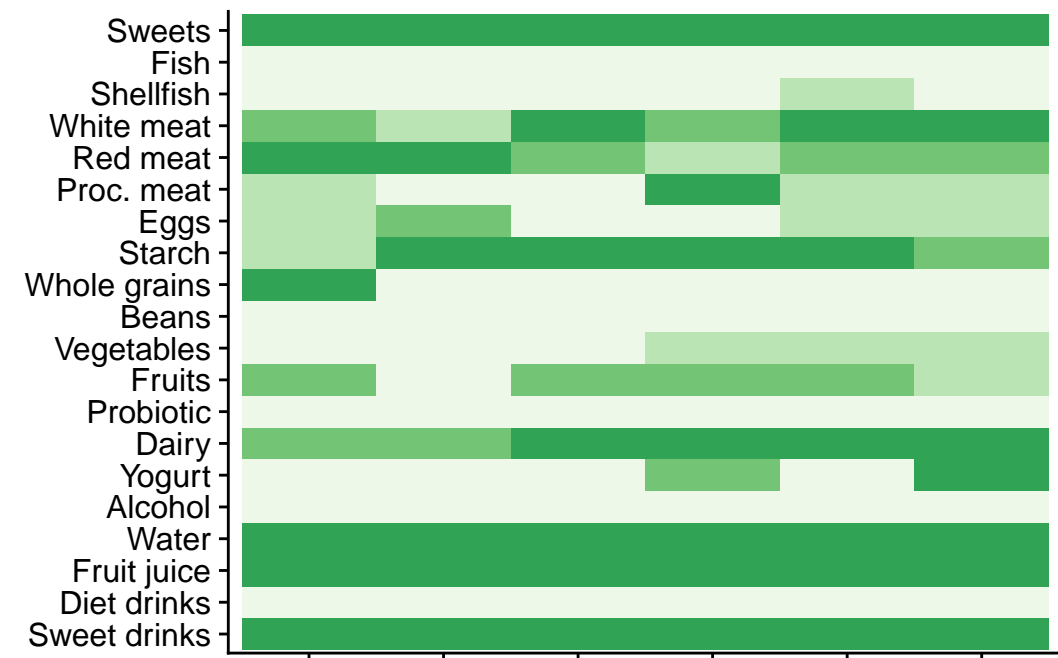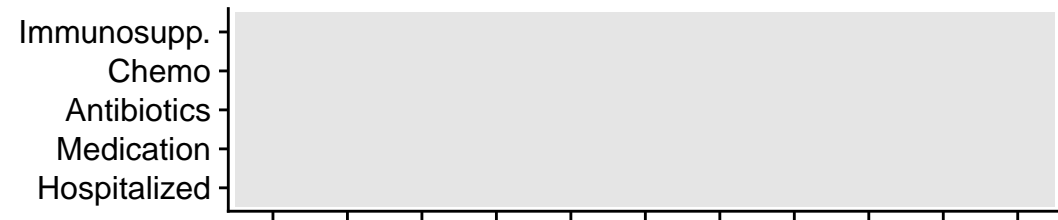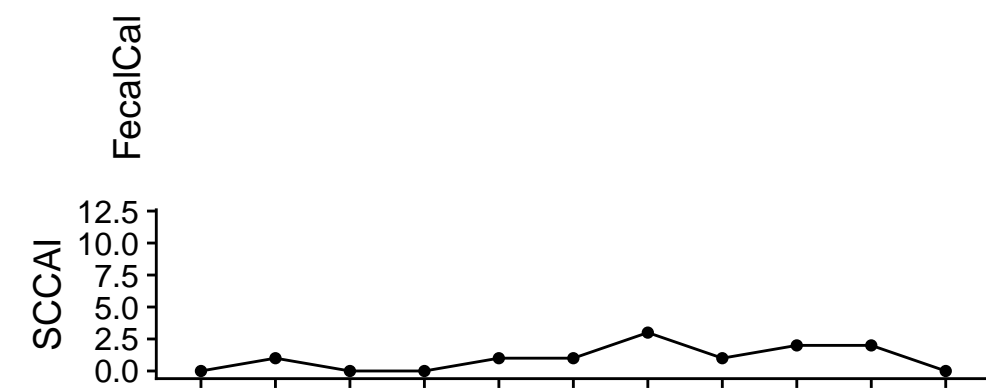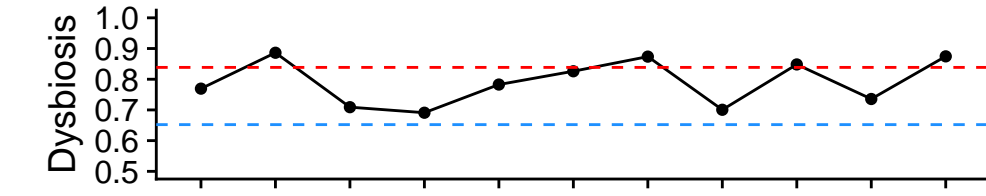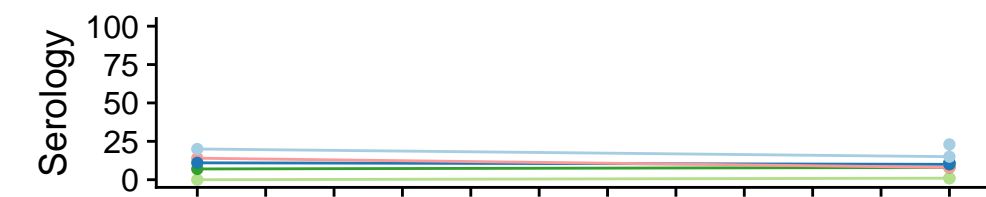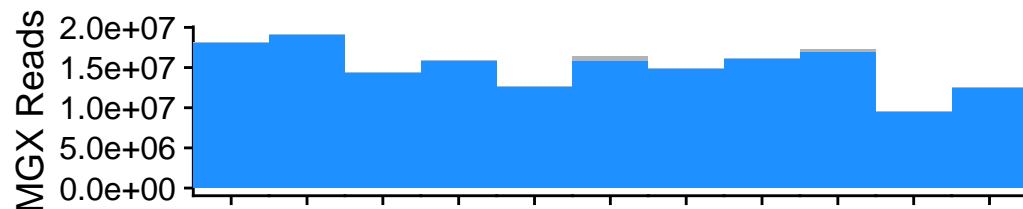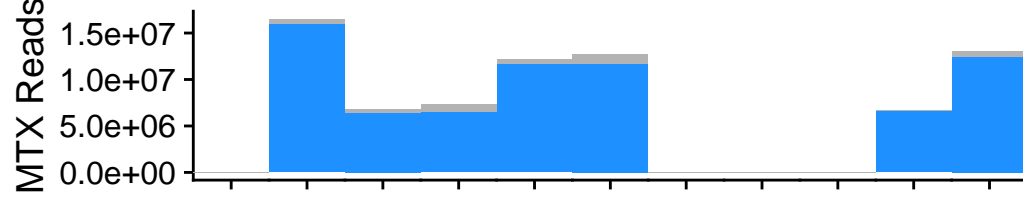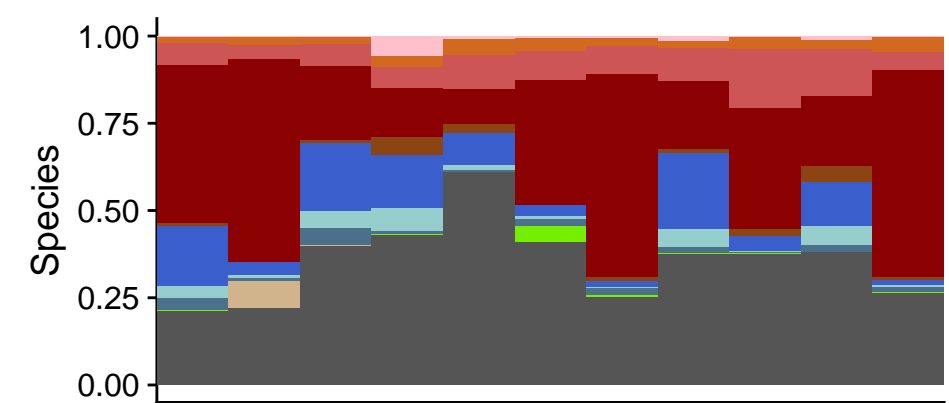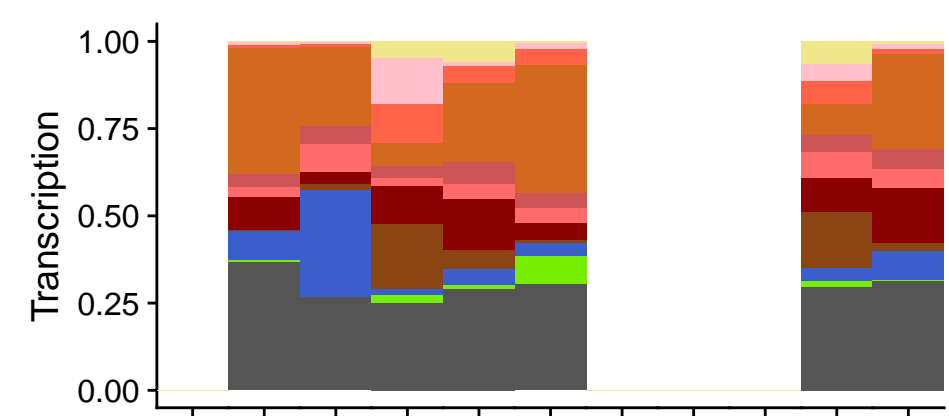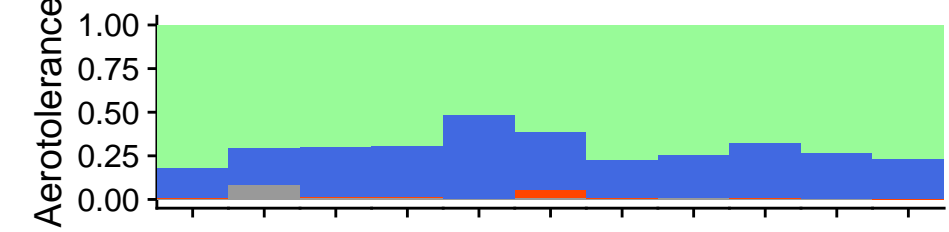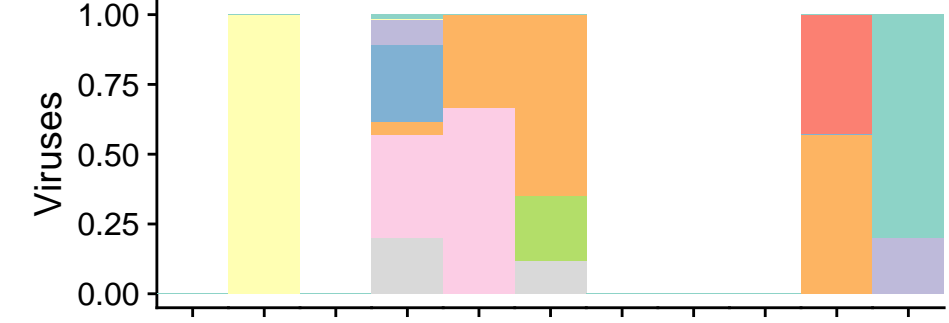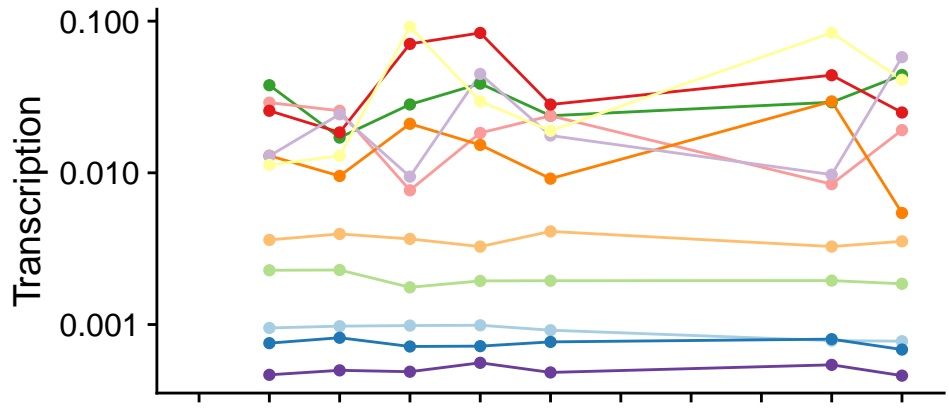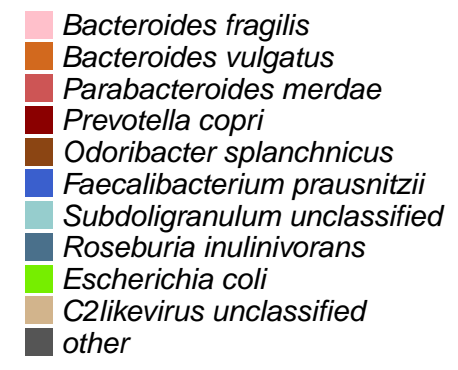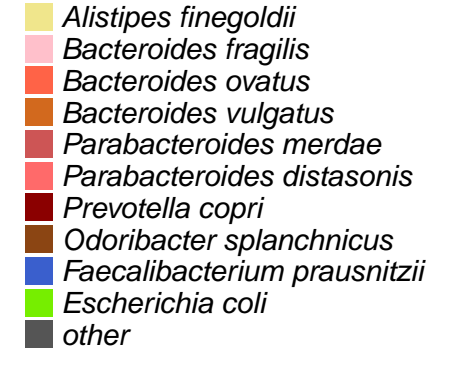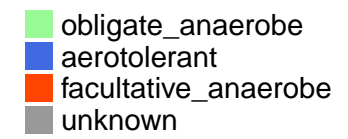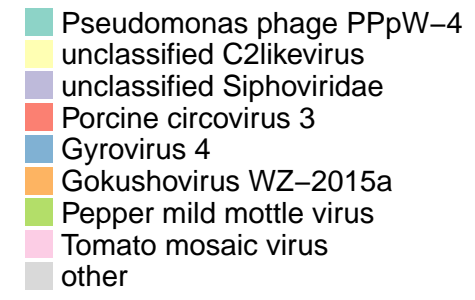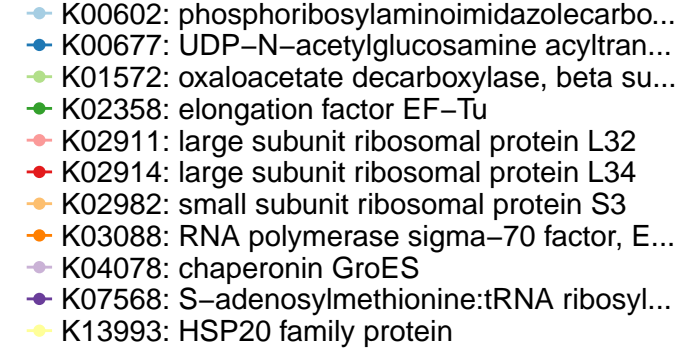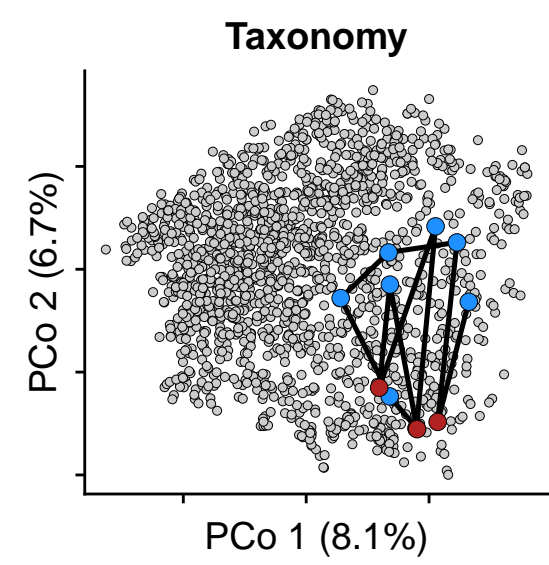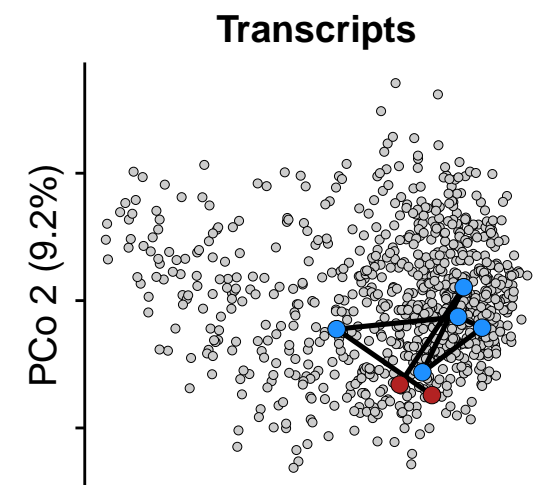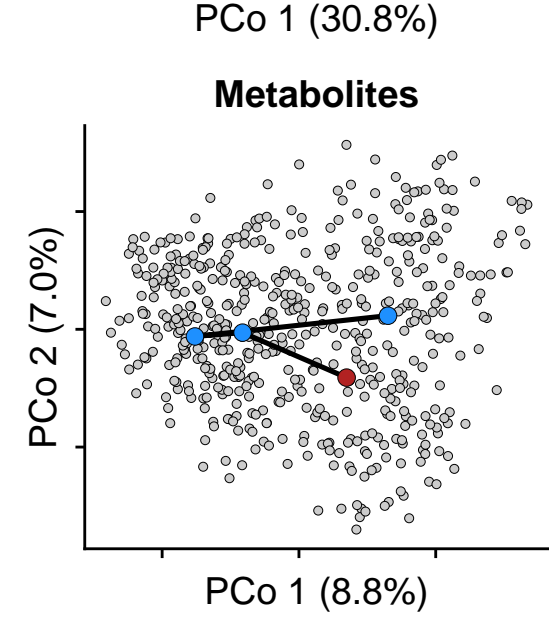

# H4042: 15 Male White Cincinnati | UC

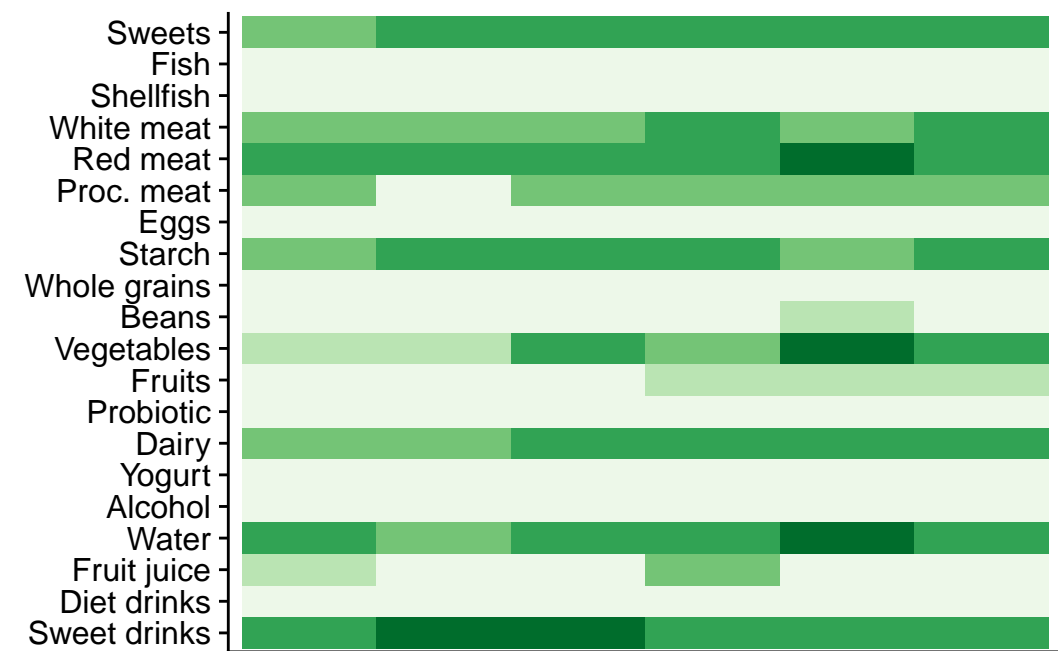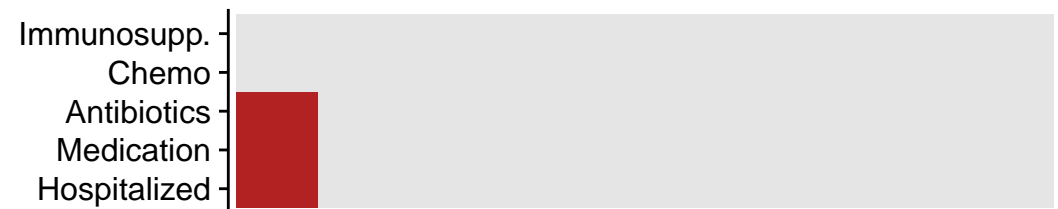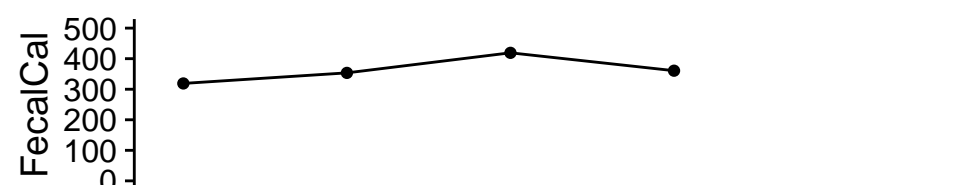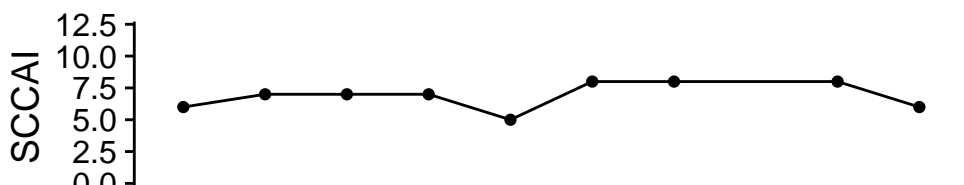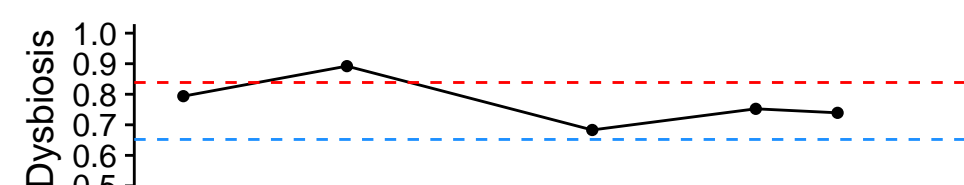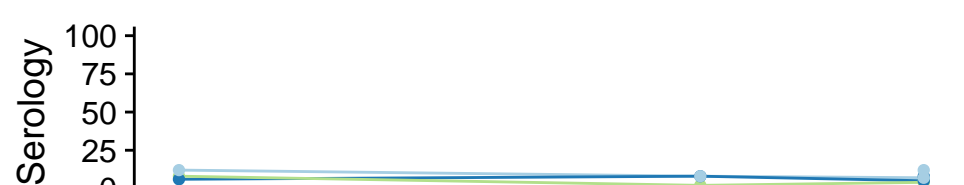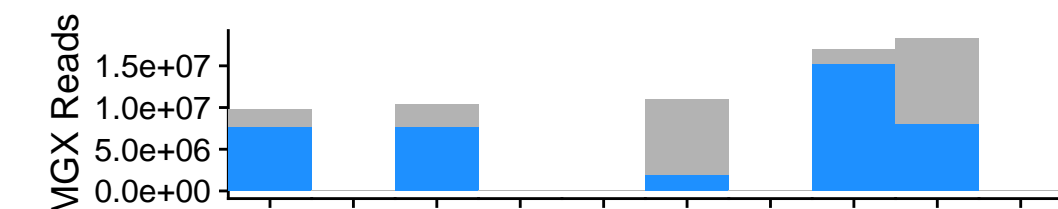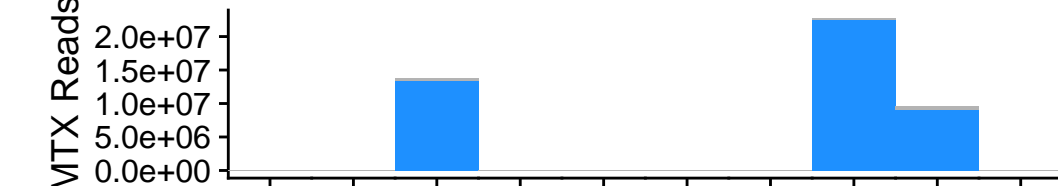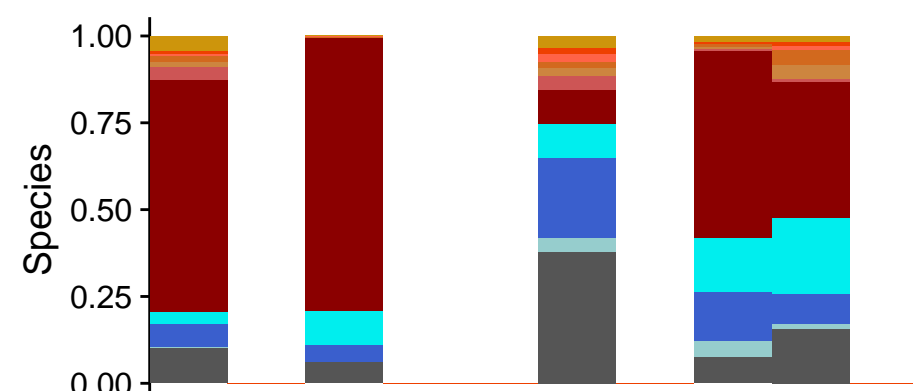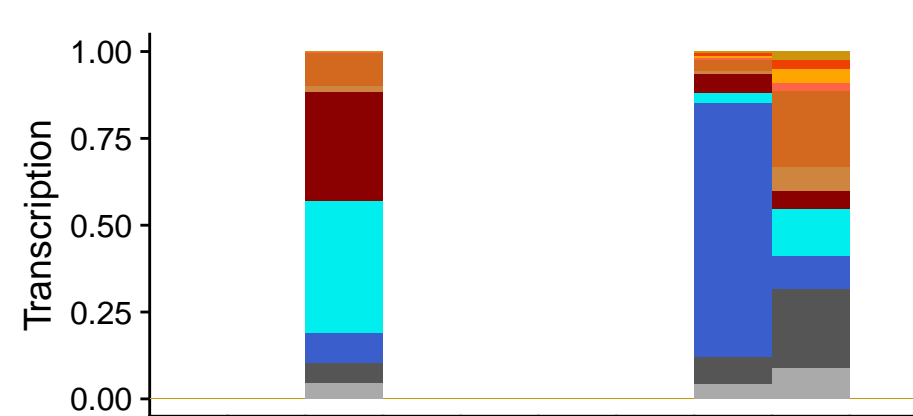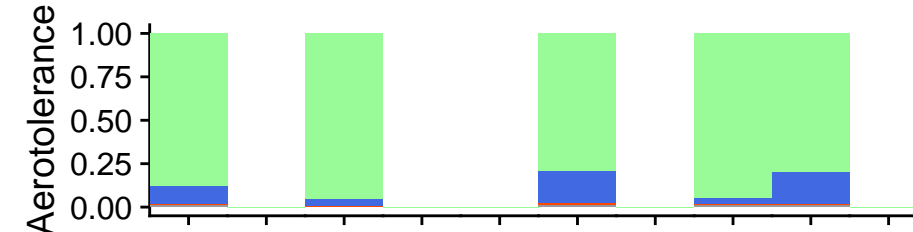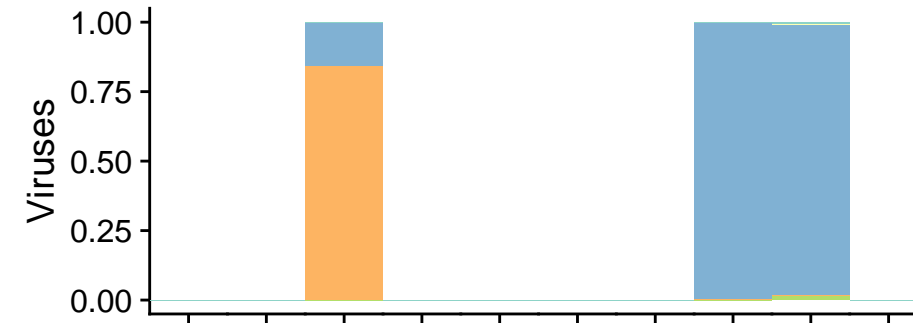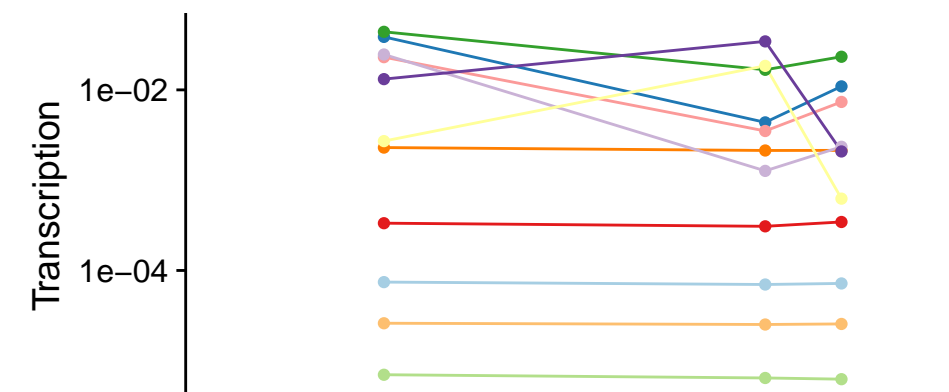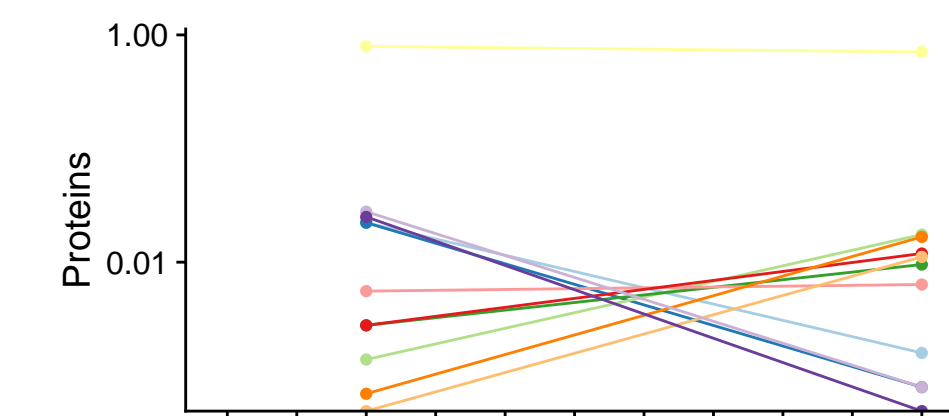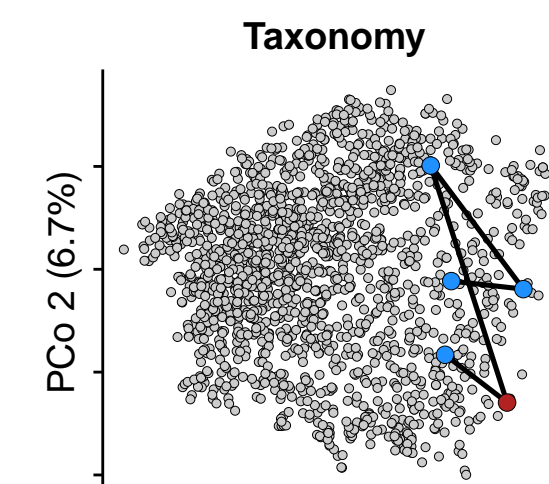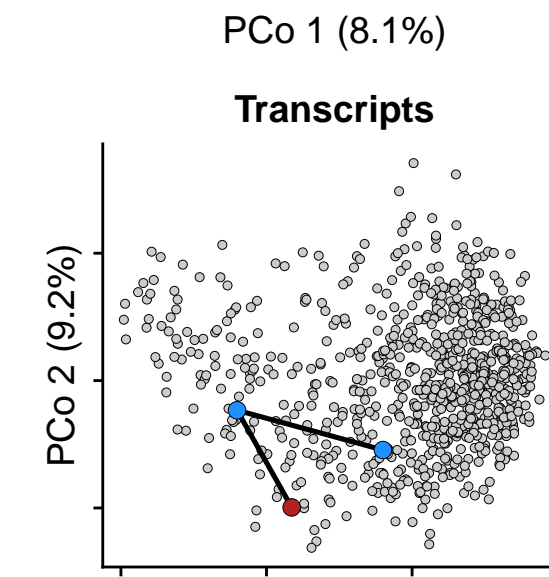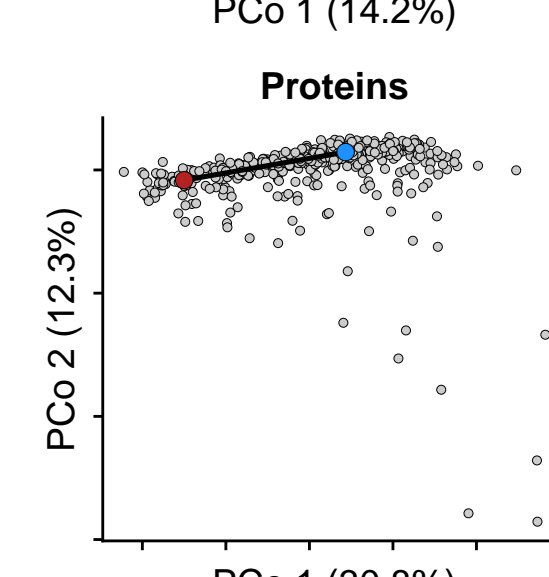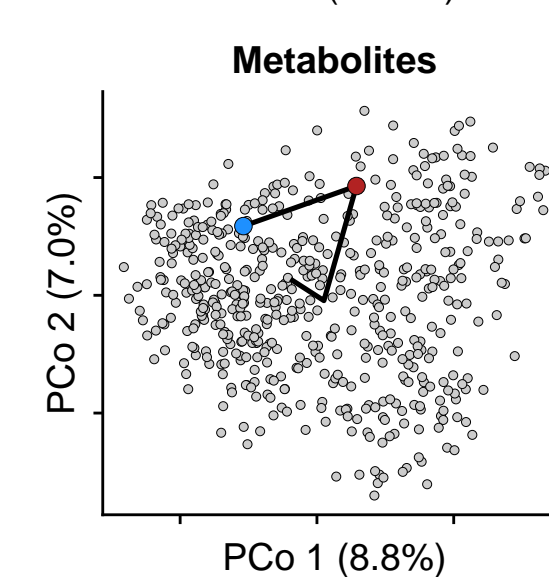



# H4043: 14 Female White Cincinnati | CD L3

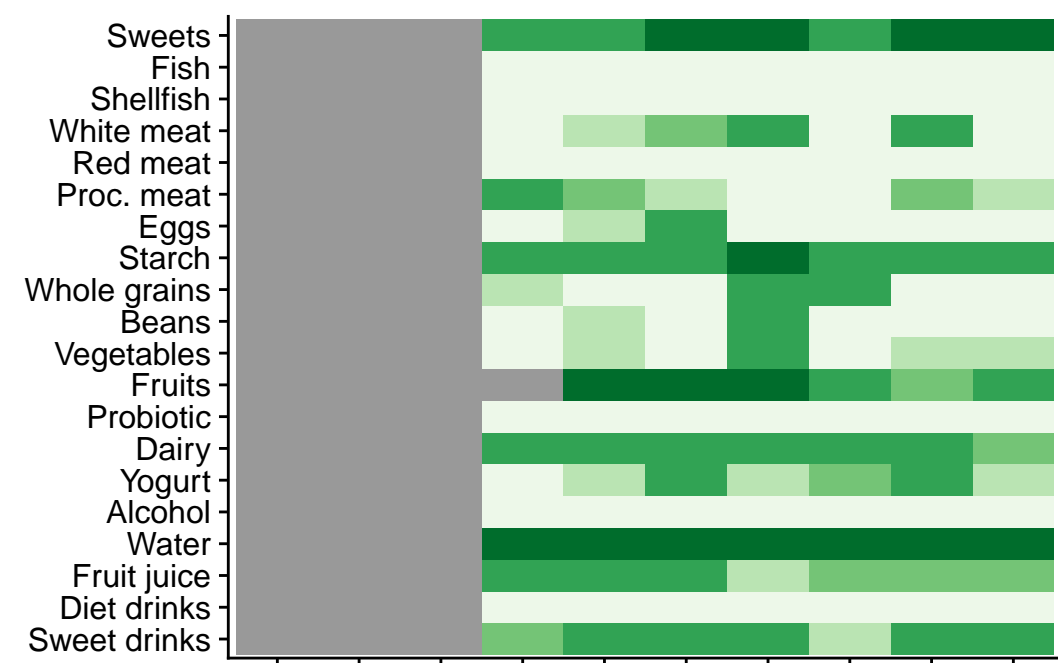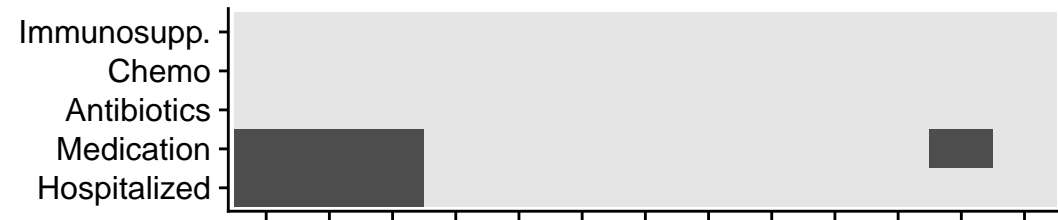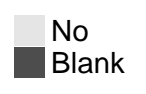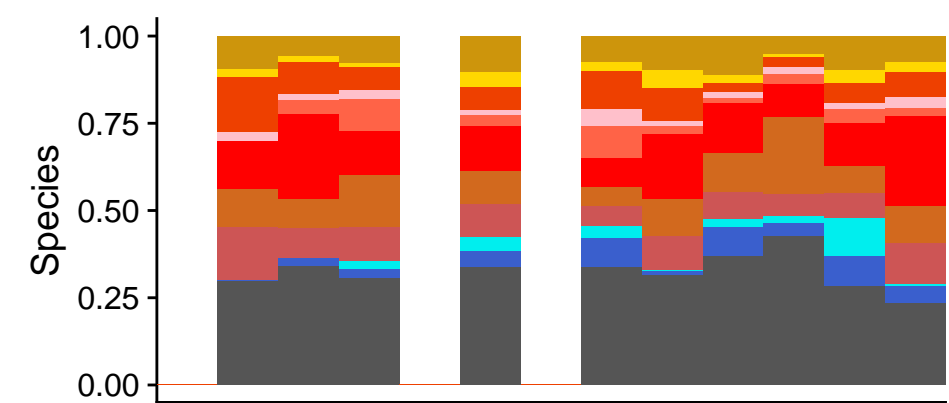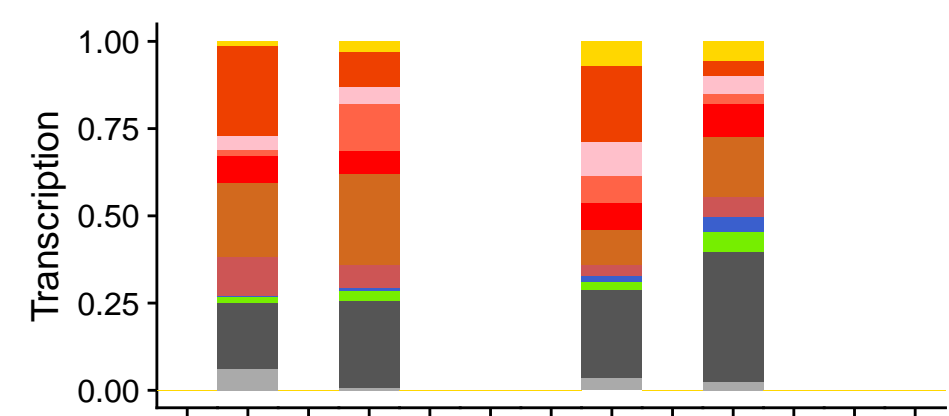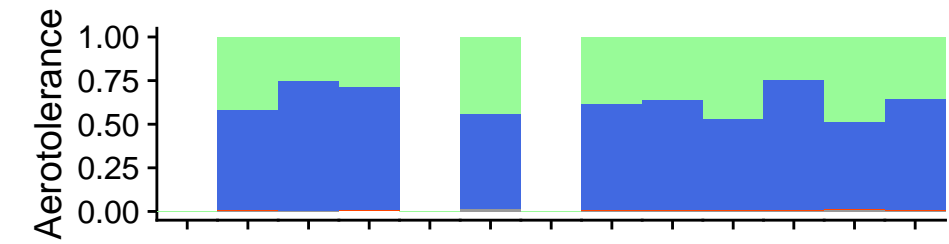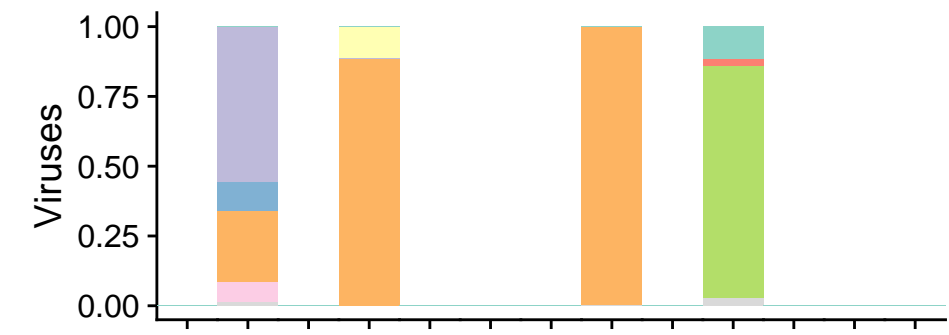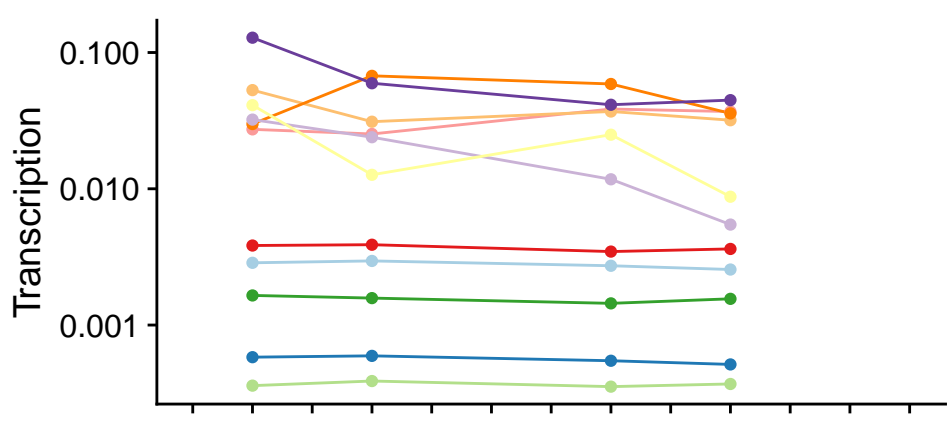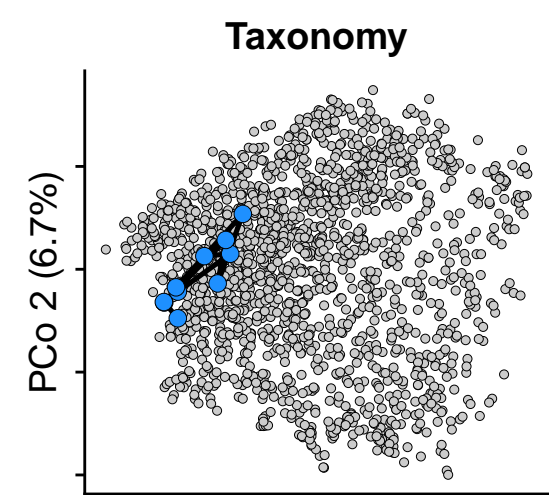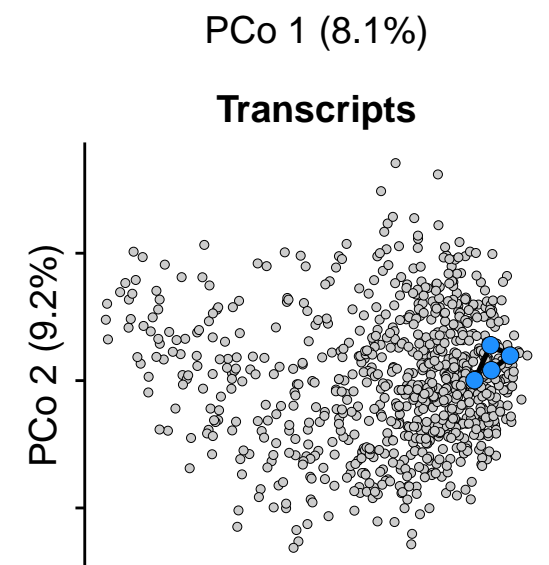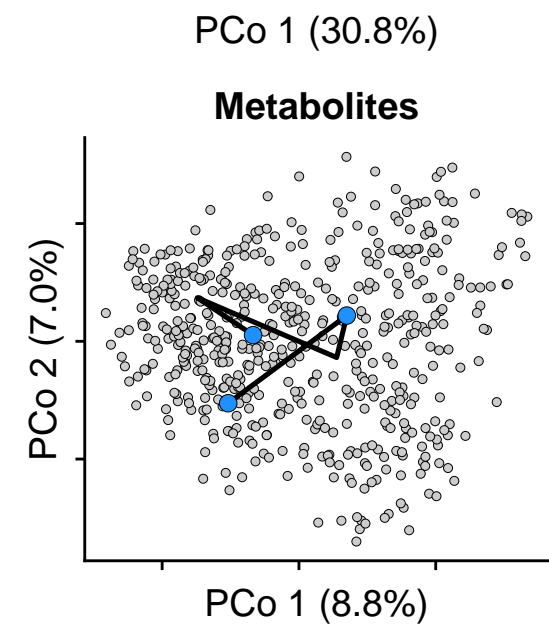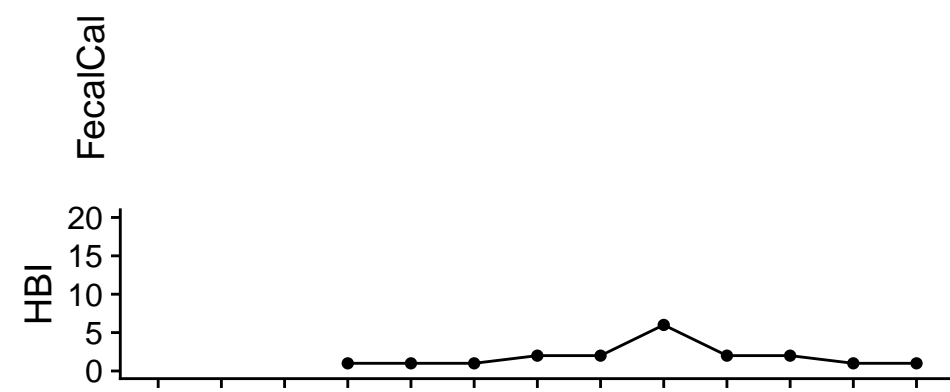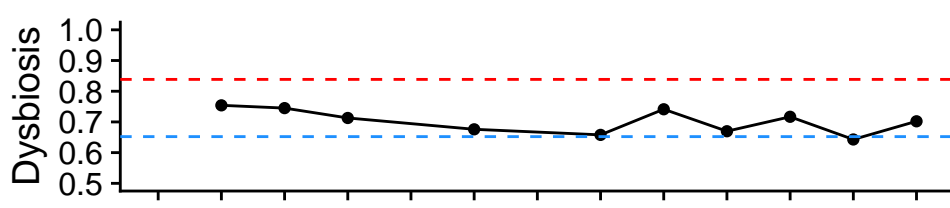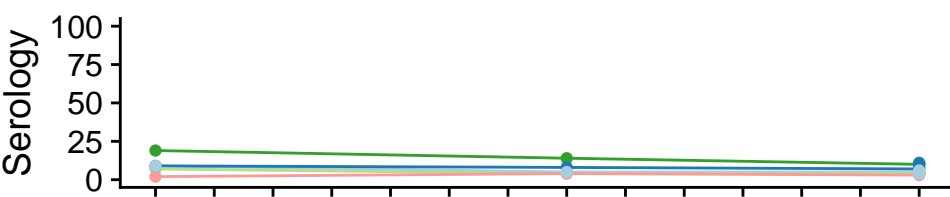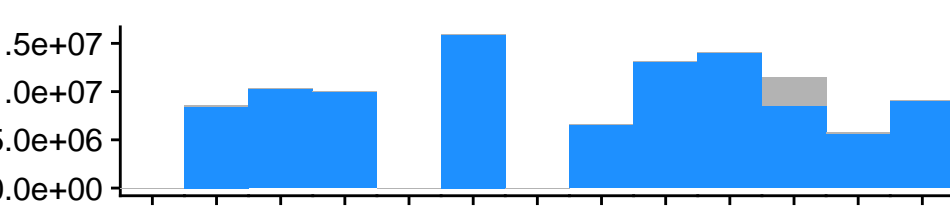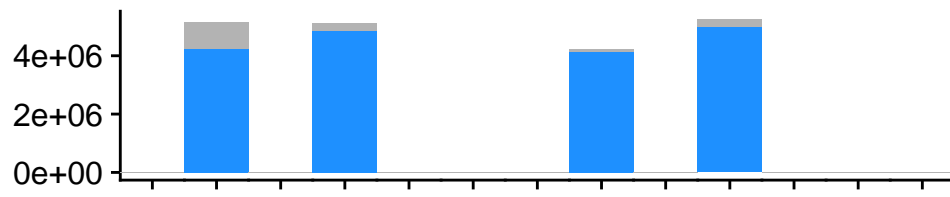

# H4044: 16 Male White Cincinnati | UC

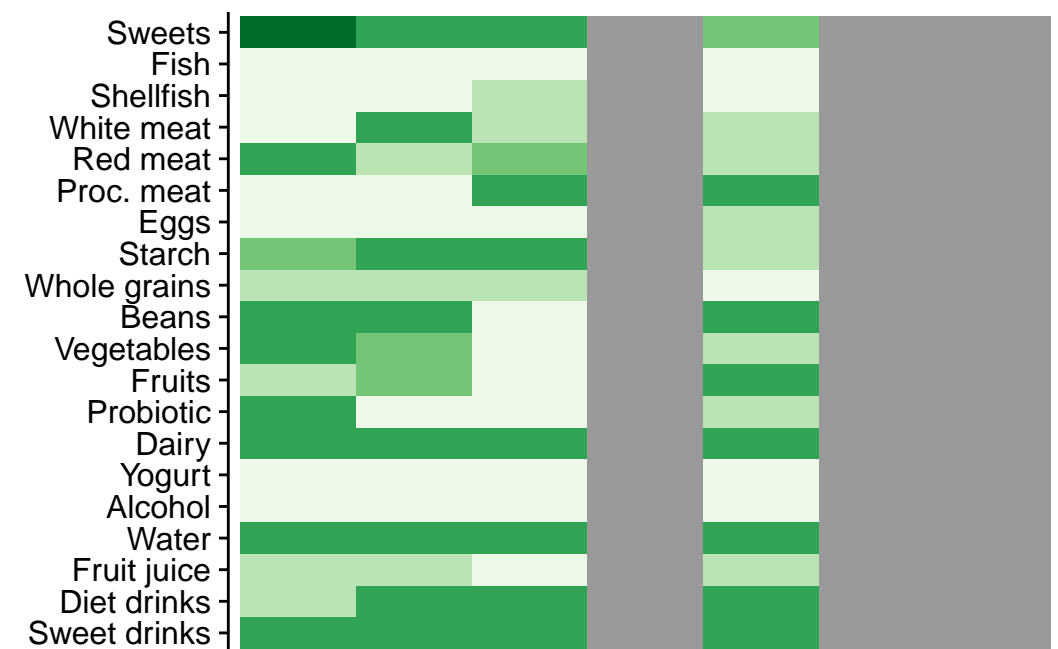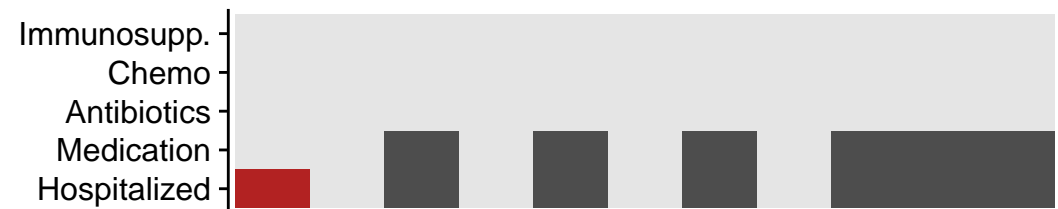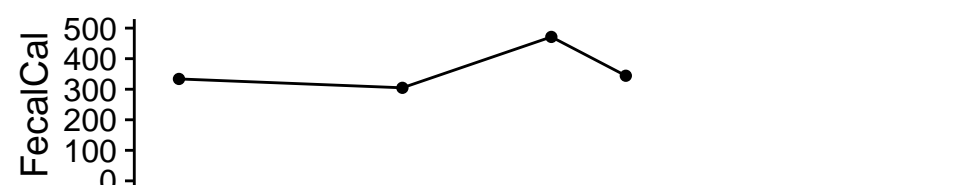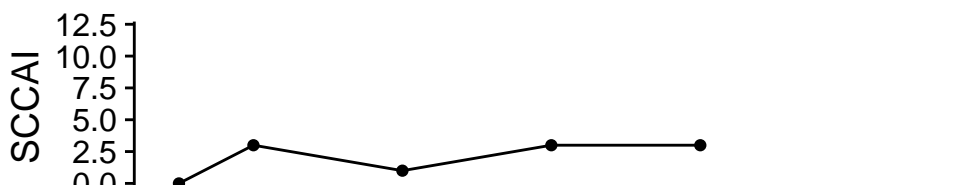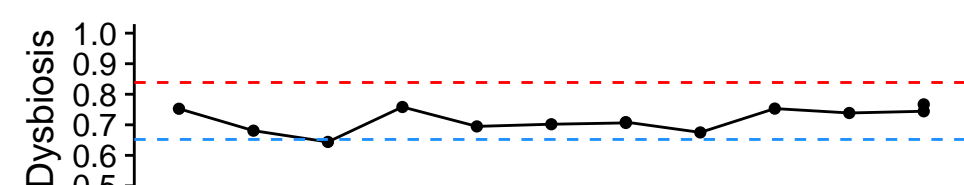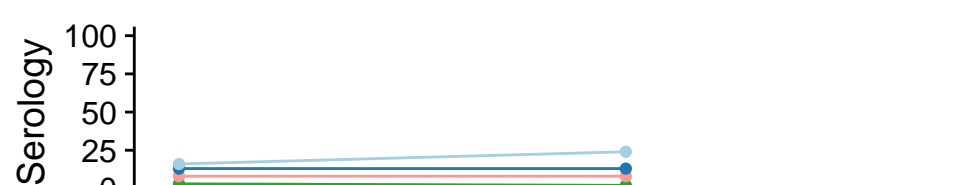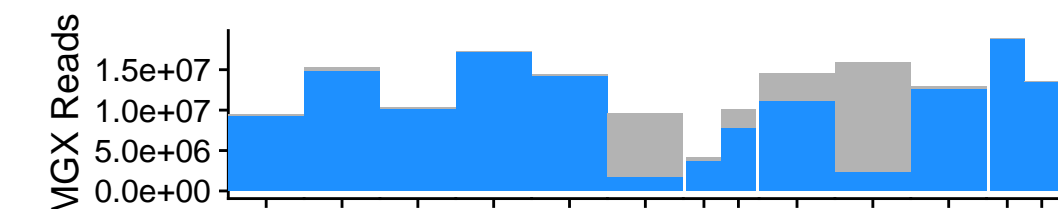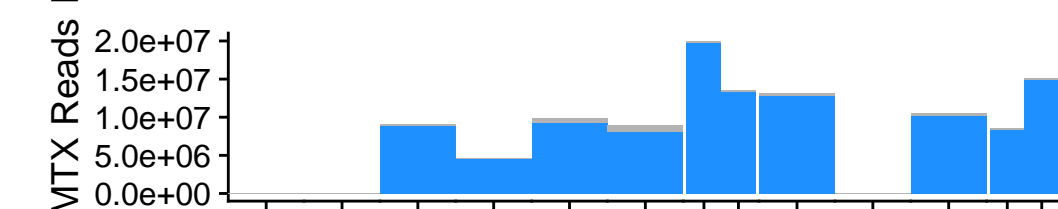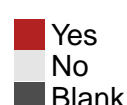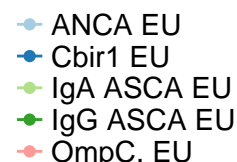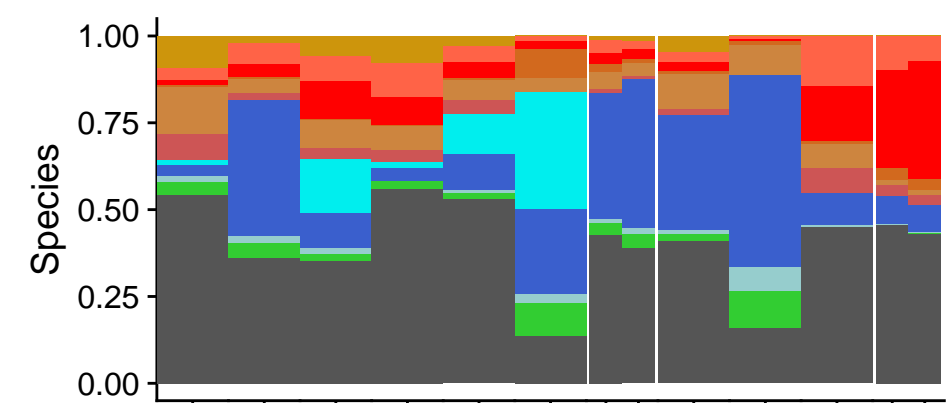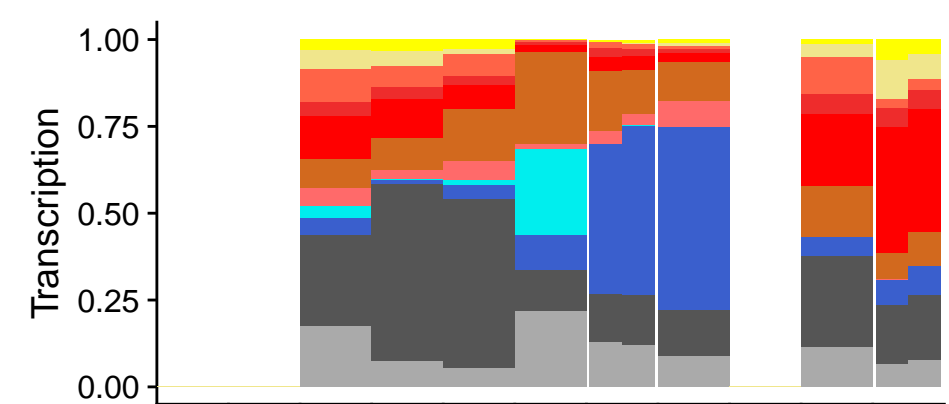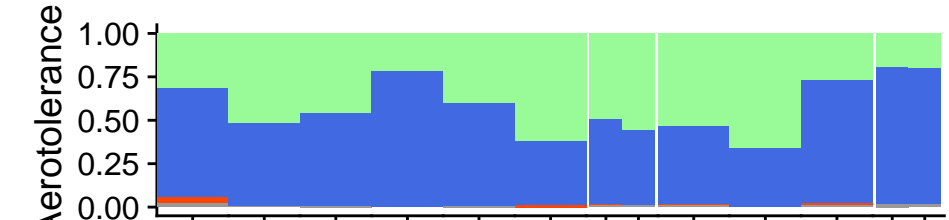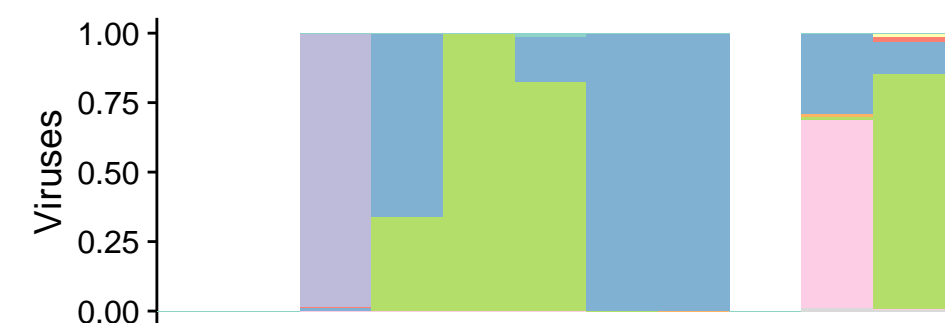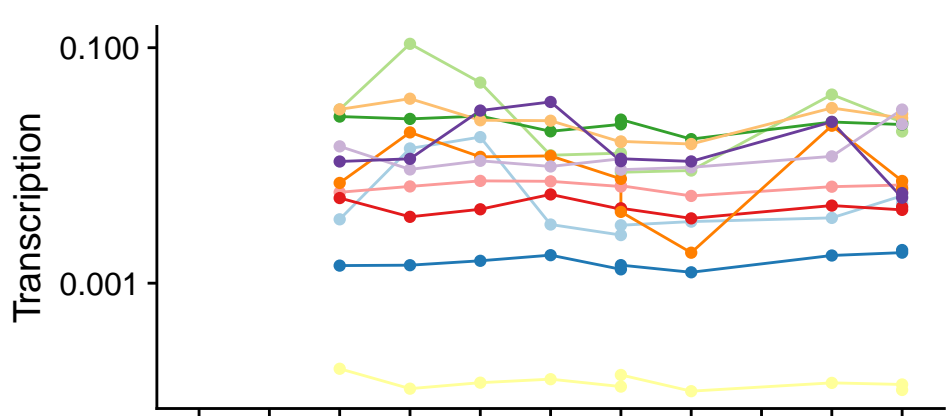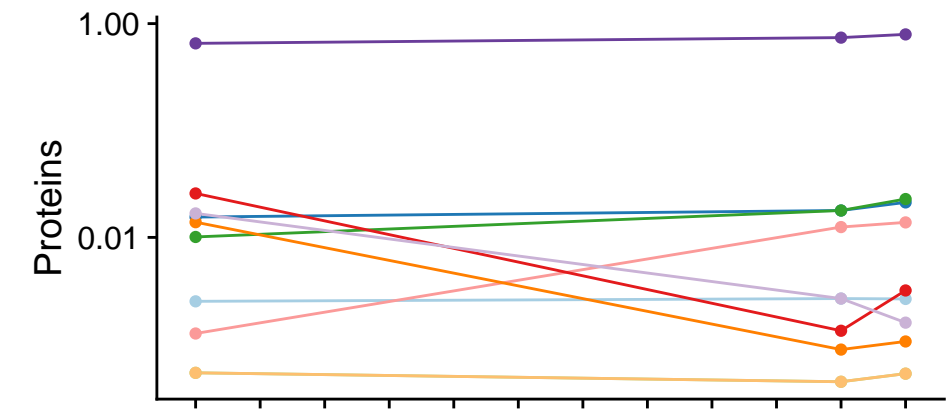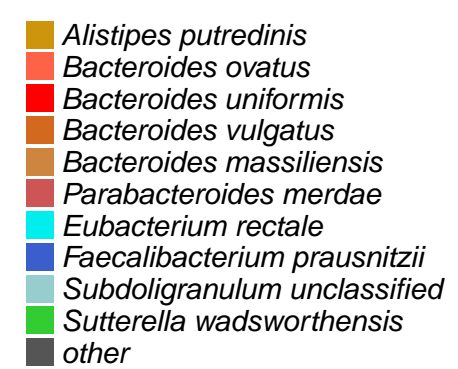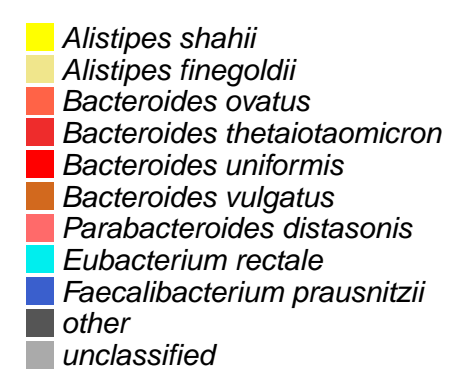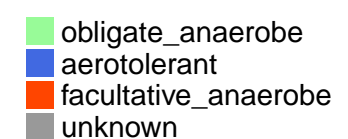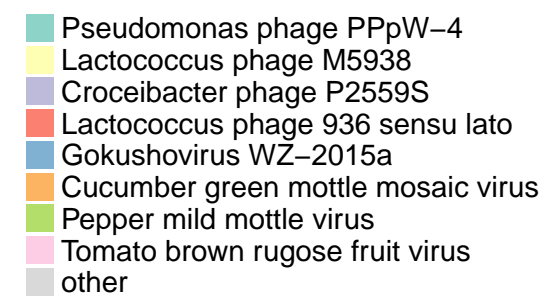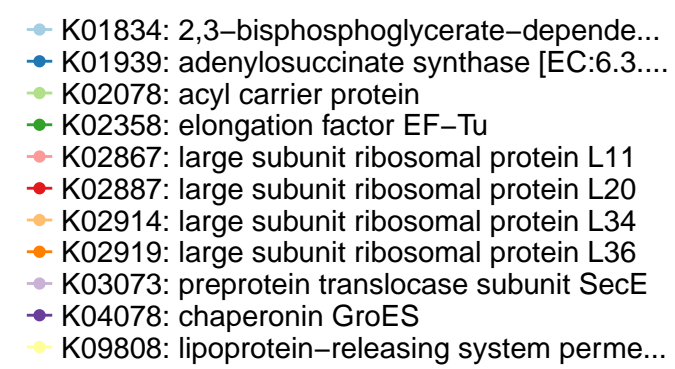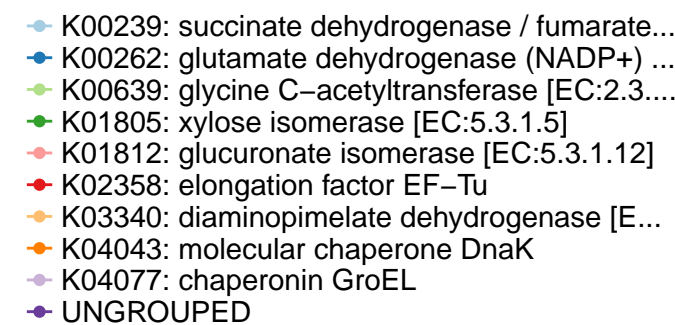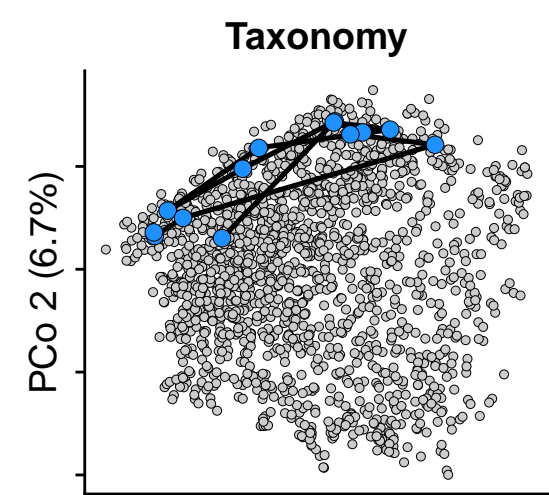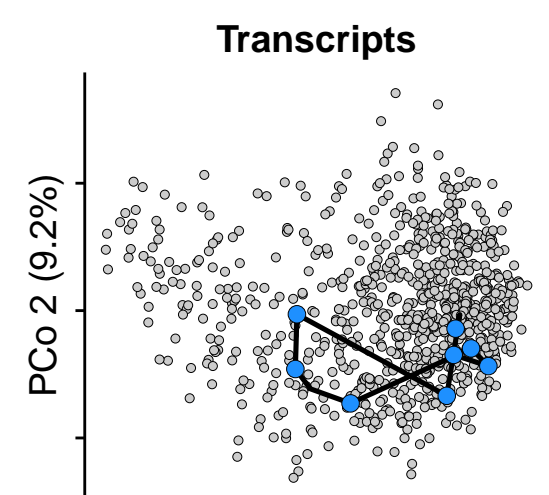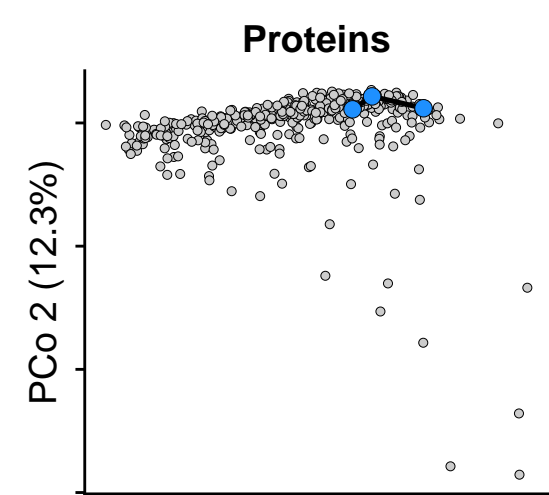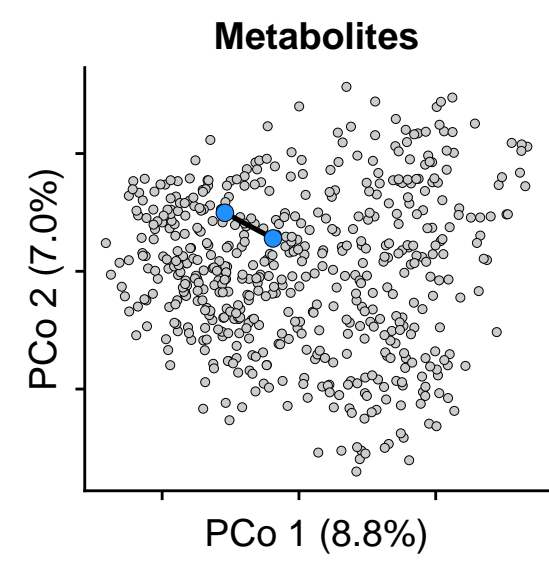

# H4045: 14 Female White Cincinnati | nonIBD

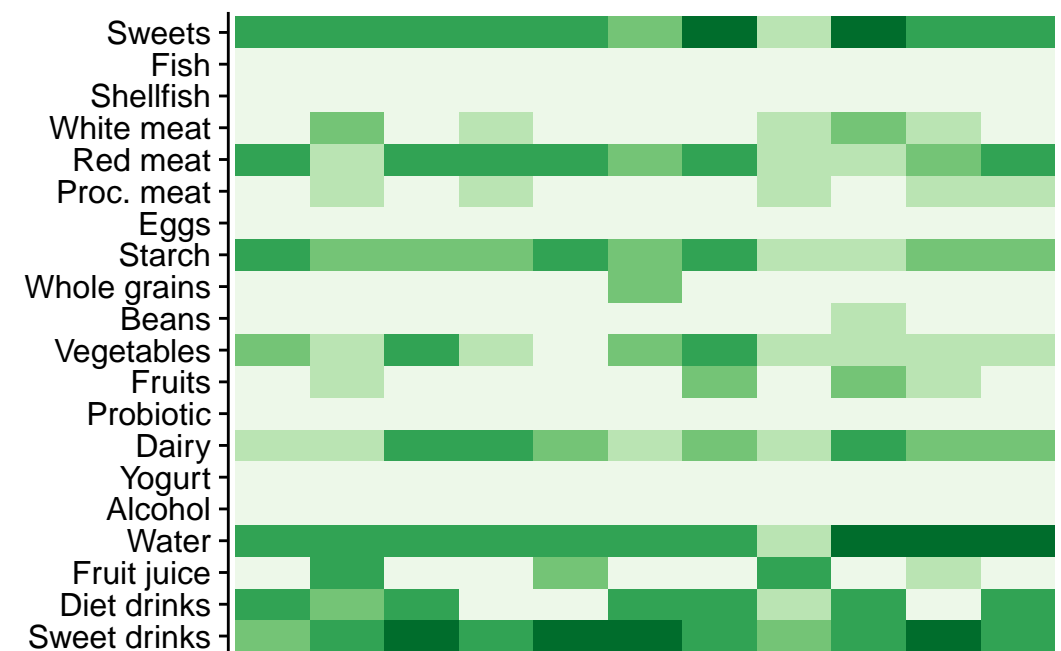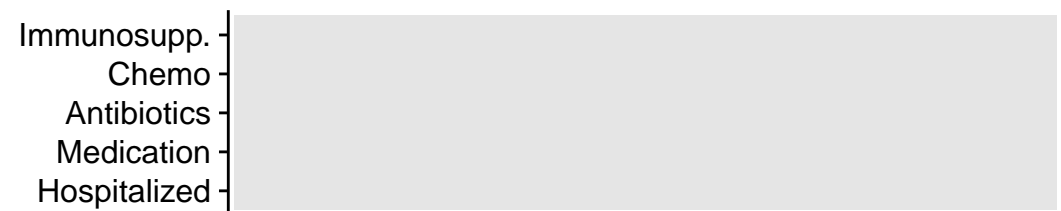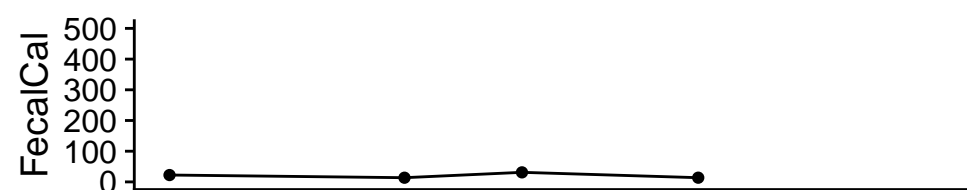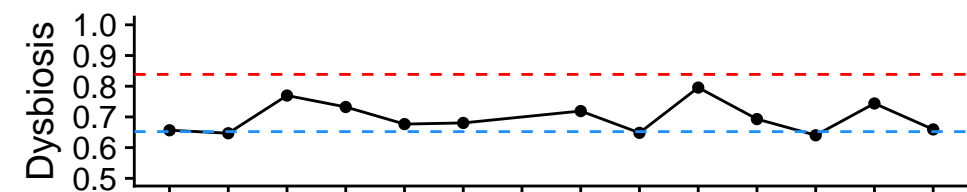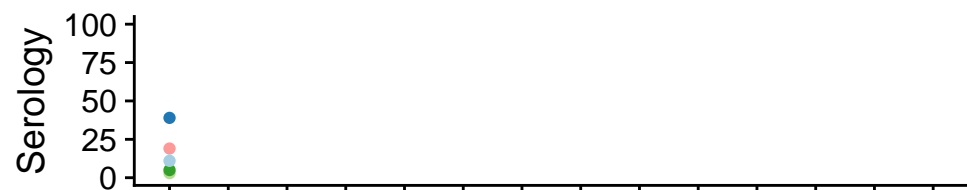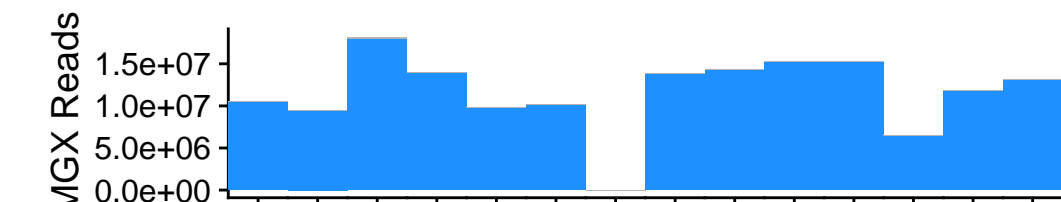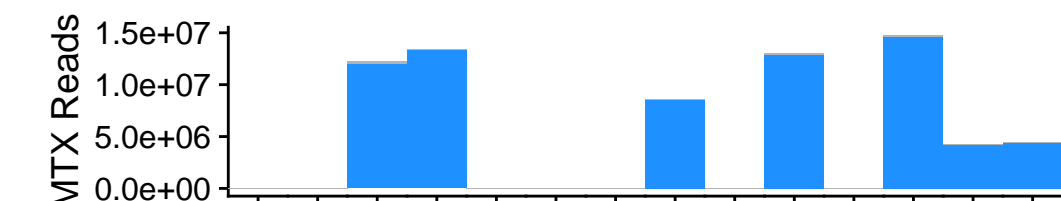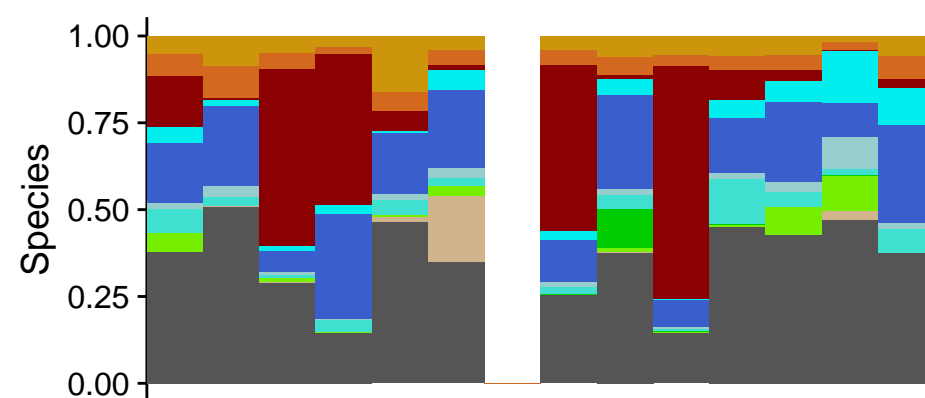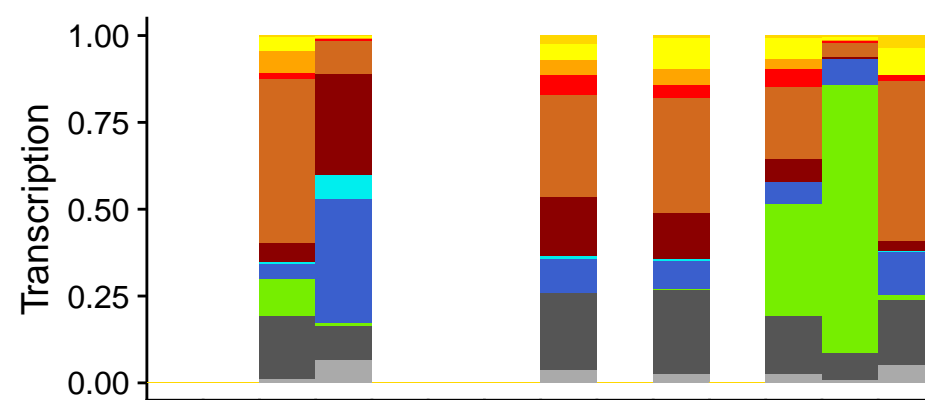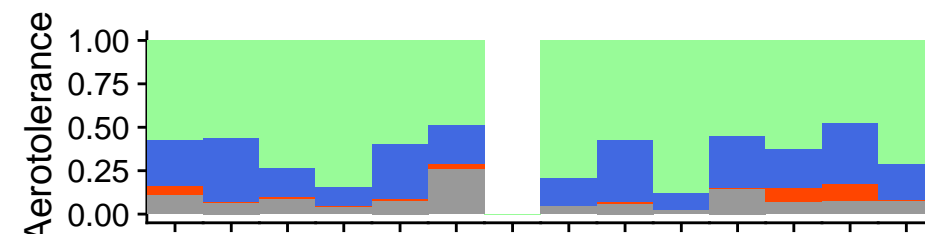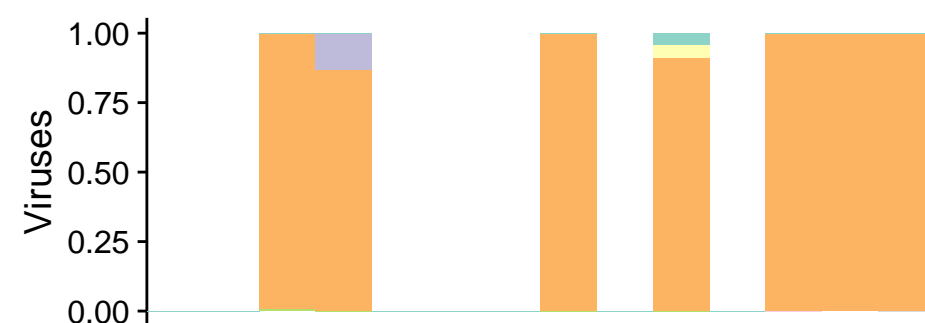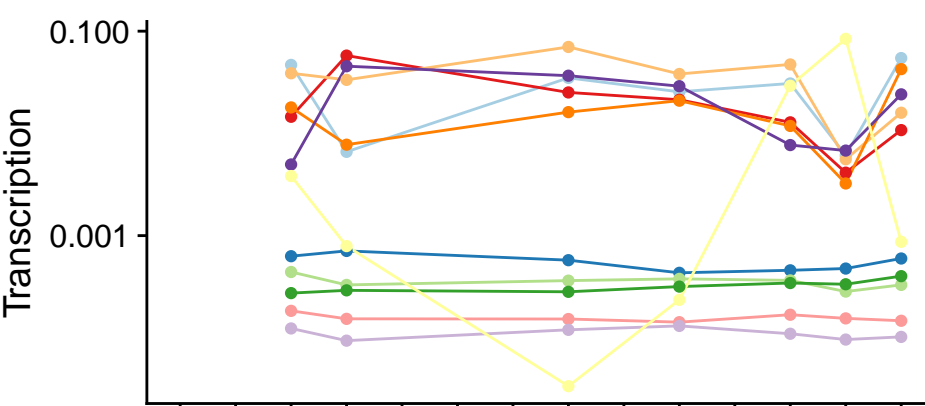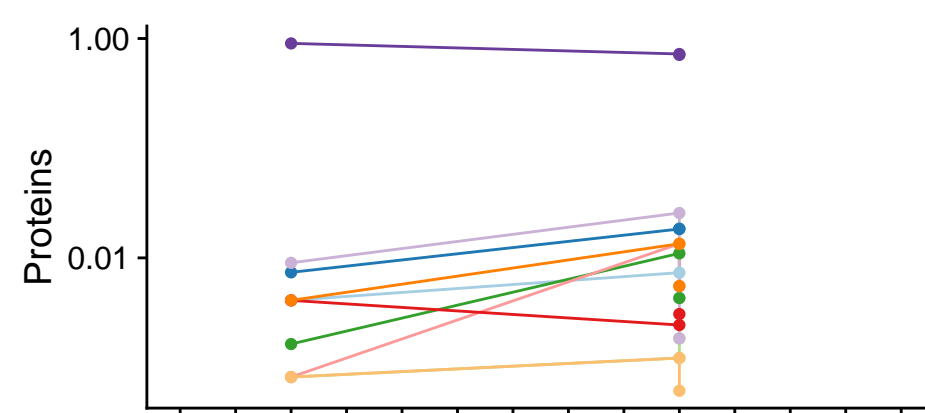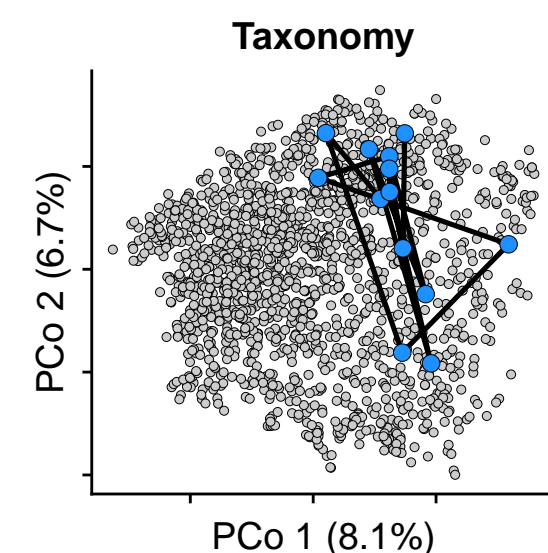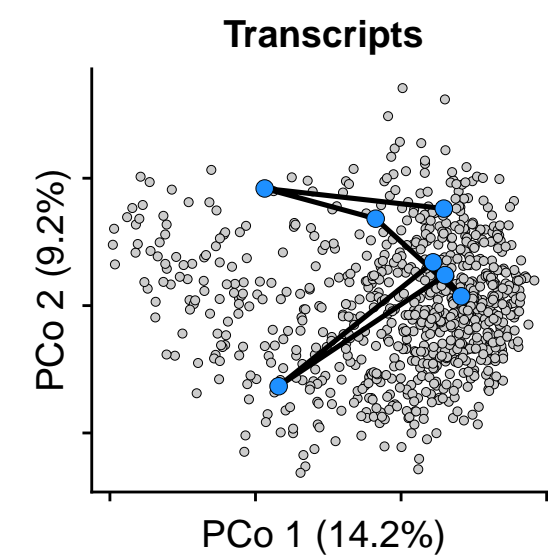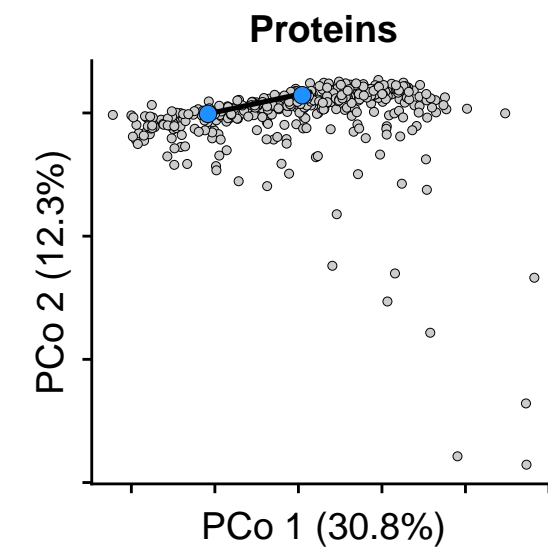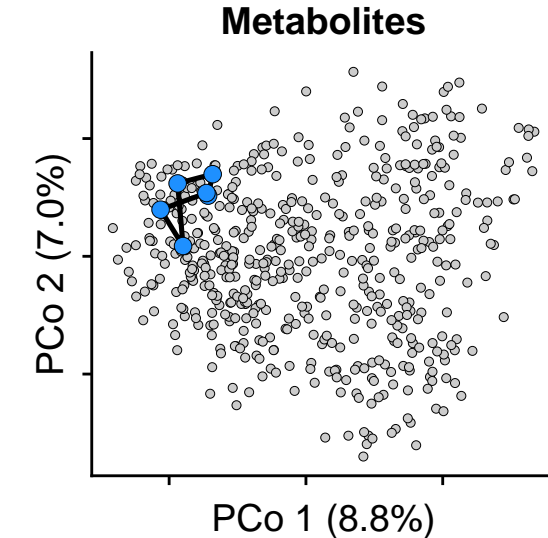

M2008: 30 Female White MGH | CD

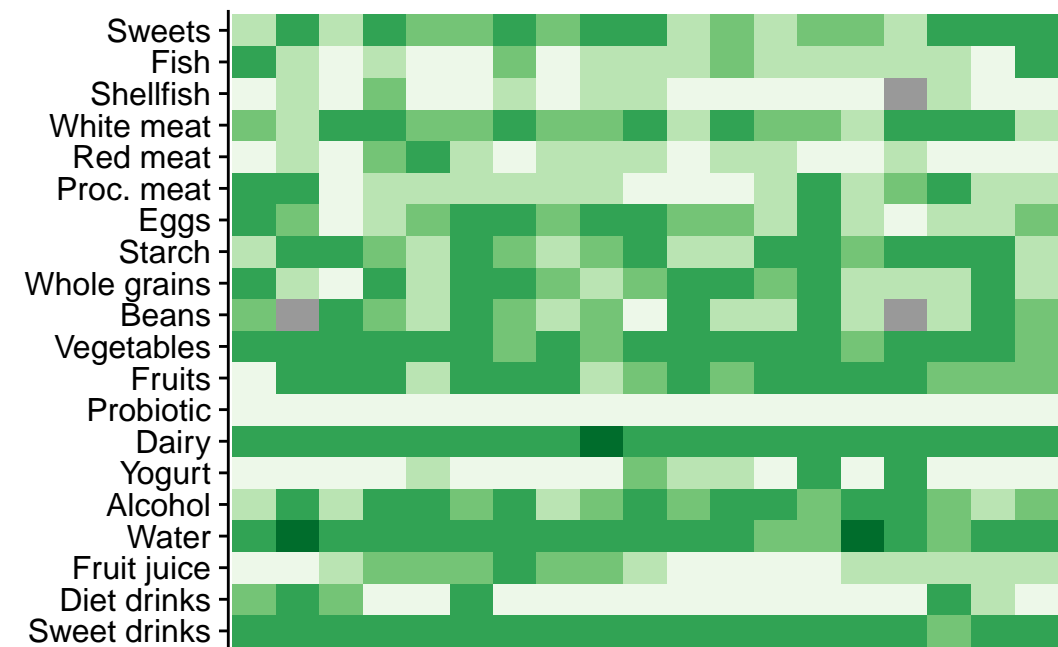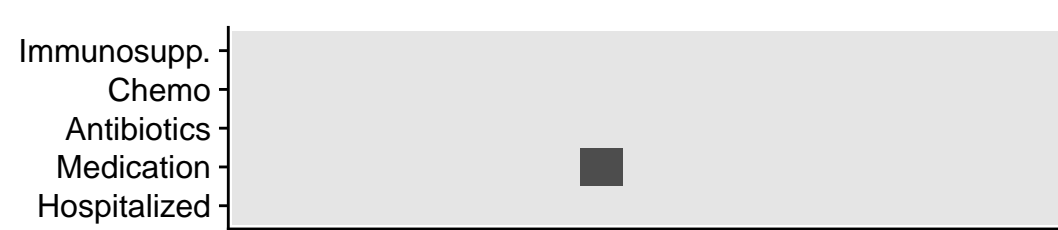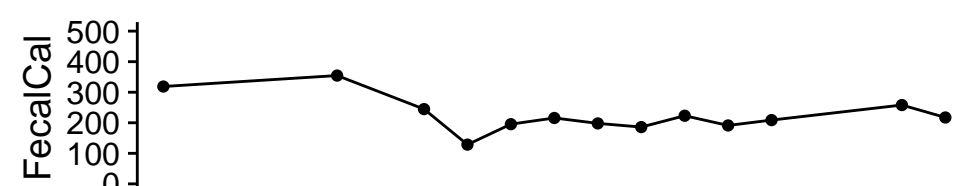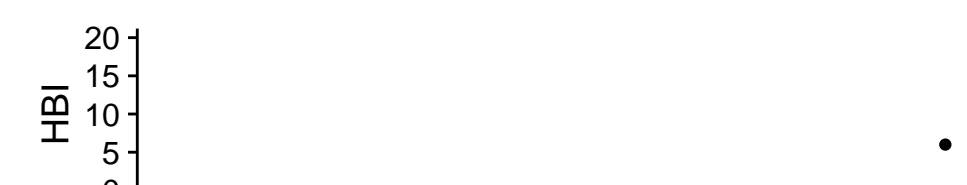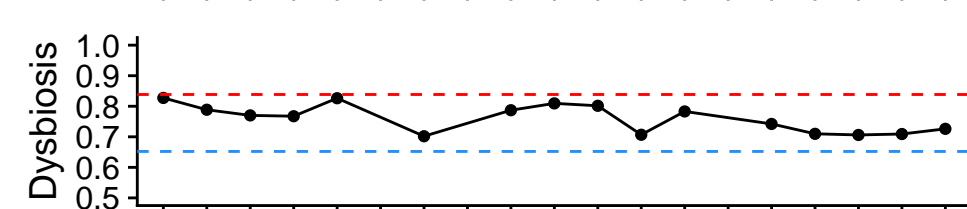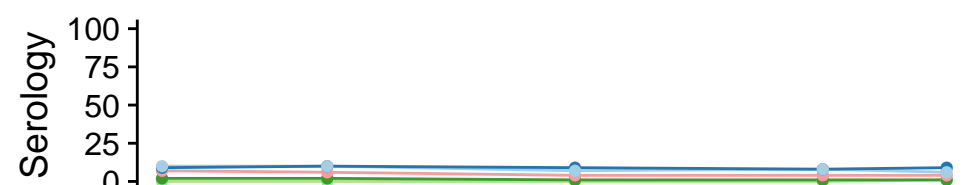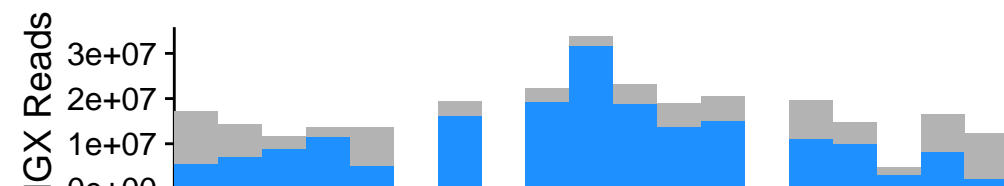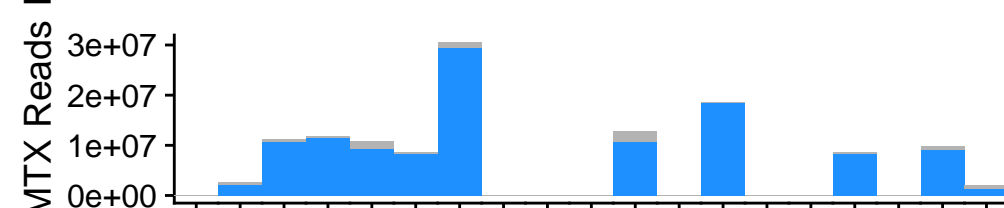

Blank  
None 7+ days  
Within 4-7 days  
Within 2-3 days  
Yesterday 1-2x  
Yesterday 3x+

No  
Blank

Dysbiosis  
Eubiosis

ANCA EU  
Cbir1 EU  
IgA ASCA EU  
IgG ASCA EU  
OmpC. EU

Human  
Filtered

Human  
Filtered

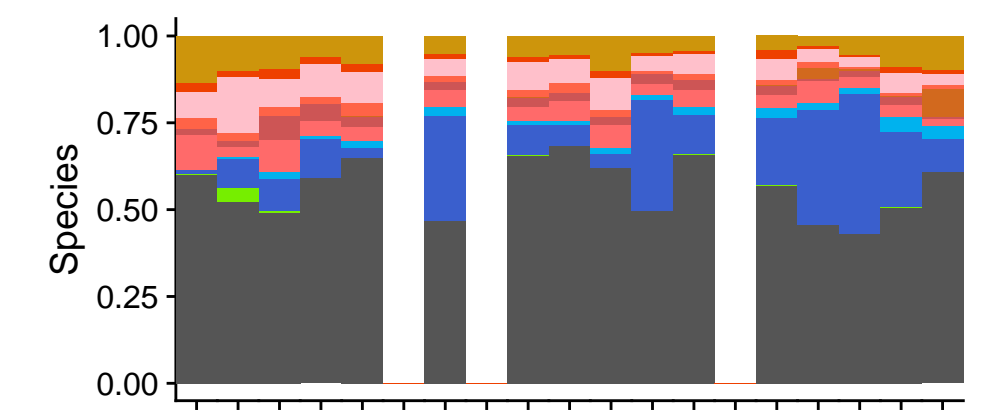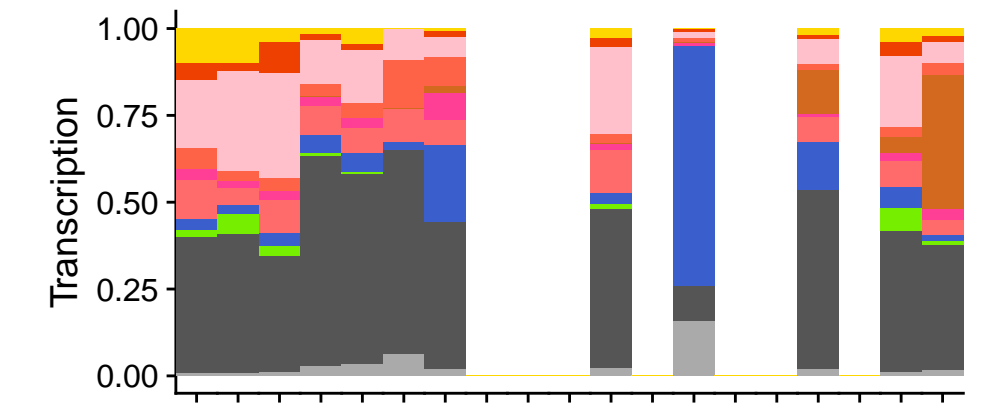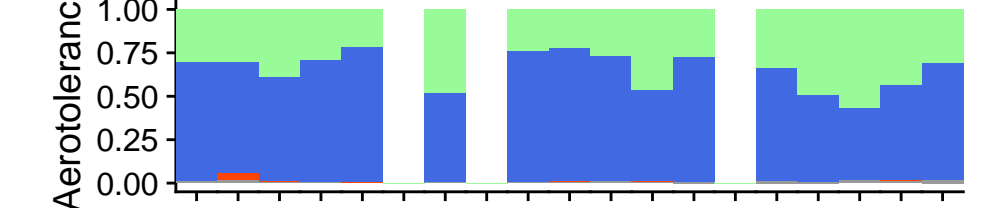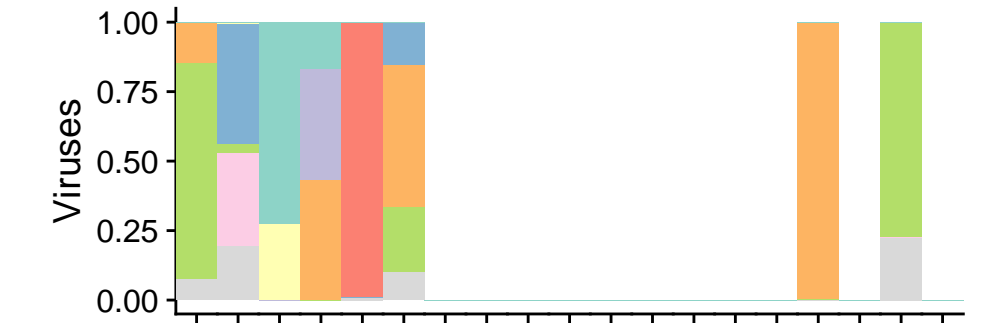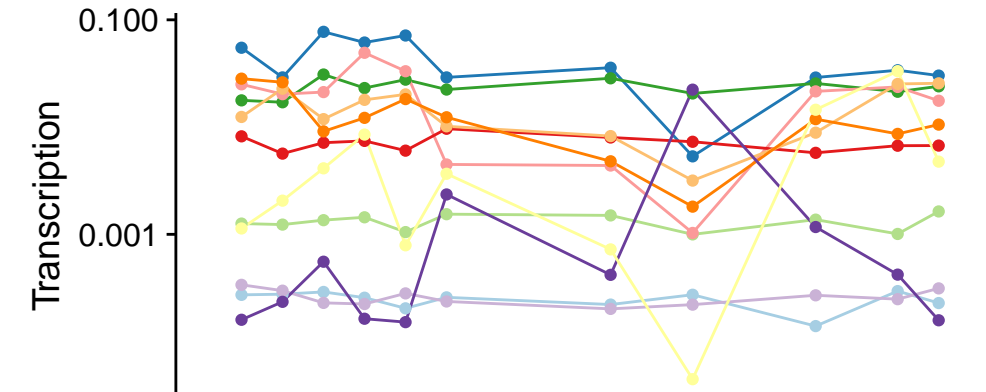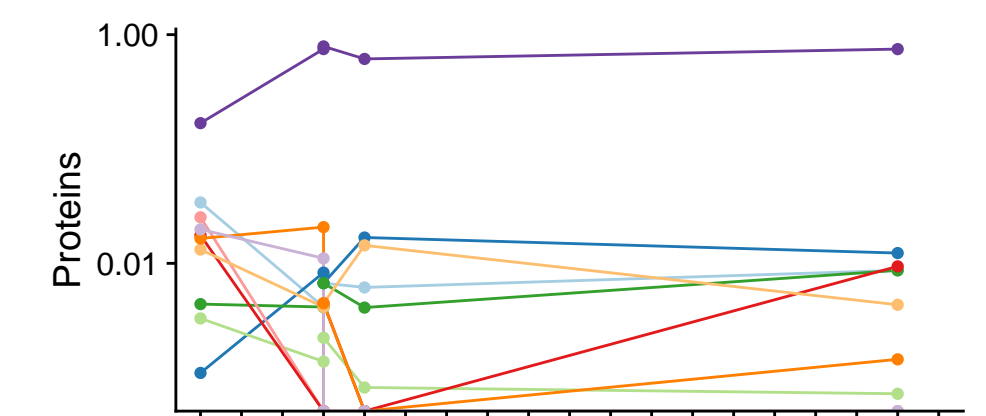

*Alistipes putredinis*  
*Bacteroides caccae*  
*Bacteroides fragilis*  
*Bacteroides ovatus*  
*Bacteroides vulgatus*  
*Parabacteroides merdae*  
*Parabacteroides distasonis*  
*Eubacterium siraeum*  
*Faecalibacterium prausnitzii*  
*Escherichia coli*  
other

*Alistipes onderdonkii*  
*Bacteroides caccae*  
*Bacteroides fragilis*  
*Bacteroides ovatus*  
*Bacteroides vulgatus*  
*Bacteroides xylanisolvens*  
*Parabacteroides distasonis*  
*Faecalibacterium prausnitzii*  
*Escherichia coli*  
other  
unclassified

obligate\_anaerobe  
aerotolerant  
facultative\_anaerobe  
unknown

*Pseudomonas phage PPpW-4*  
unclassified C2likevirus  
Gyrovirus 4  
*Parabacteroides phage YZ-2015b*  
Bell pepper mottle virus  
Pepper mild mottle virus  
Tomato mosaic virus  
Tropical soda apple mosaic virus  
other

K00286: pyrroline-5-carboxylate reductase [...]  
K02078: acyl carrier protein  
K02109: F-type H<sup>+</sup>-transporting ATPase subunit  
K02358: elongation factor EF-Tu  
K02914: large subunit ribosomal protein L34  
K02952: small subunit ribosomal protein S13  
K02968: small subunit ribosomal protein S20  
K03088: RNA polymerase sigma-70 factor, E. coli  
K04485: DNA repair protein RadA/Sms  
K10117: raffinose/stachyose/melibiose transport protein  
K19157: NO\_NAME

K00134: glyceraldehyde 3-phosphate dehydratase  
K00262: glutamate dehydrogenase (NADP<sup>+</sup>) dependent  
K00639: glycine C-acetyltransferase [EC:2.3.1.18]  
K01610: phosphoenolpyruvate carboxykinase (ATP-dependent)  
K01667: tryptophanase [EC:4.1.99.1]  
K01812: glucuronate isomerase [EC:5.3.1.12]  
K02358: elongation factor EF-Tu  
K03286: OmpA-OmpF porin, OOP family  
K10001: glutamate/aspartate transport system  
UNGROUPED

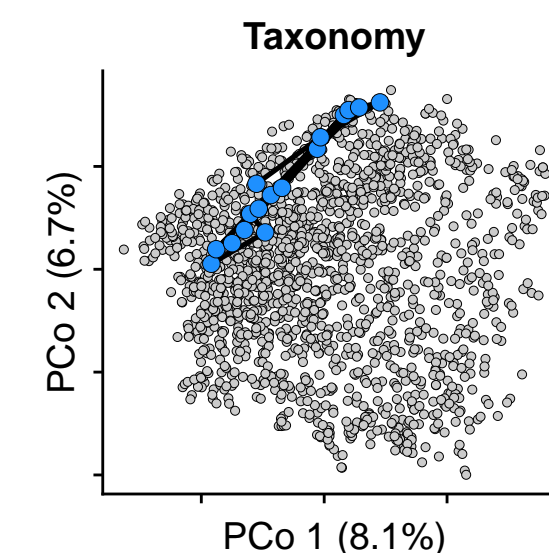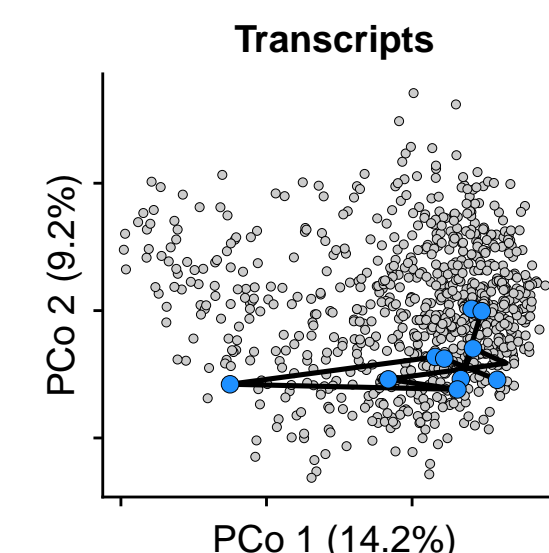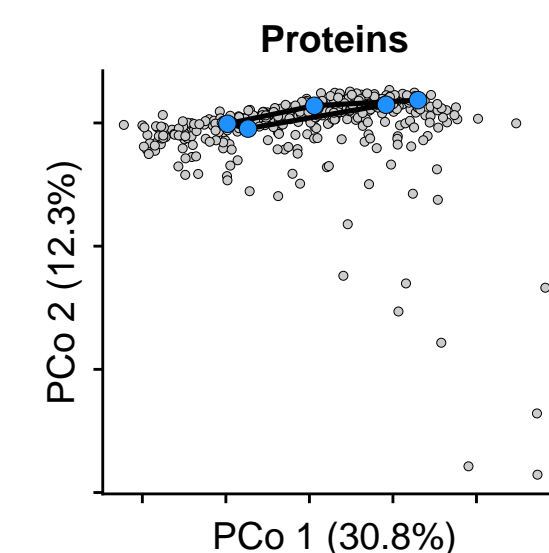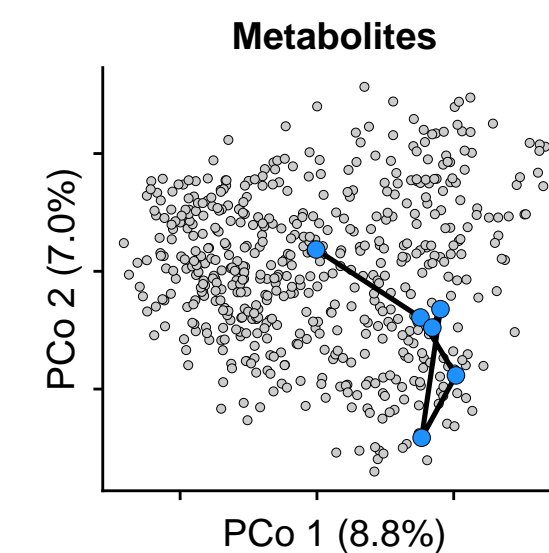

M2010: 18 Male White MGH | CD L1

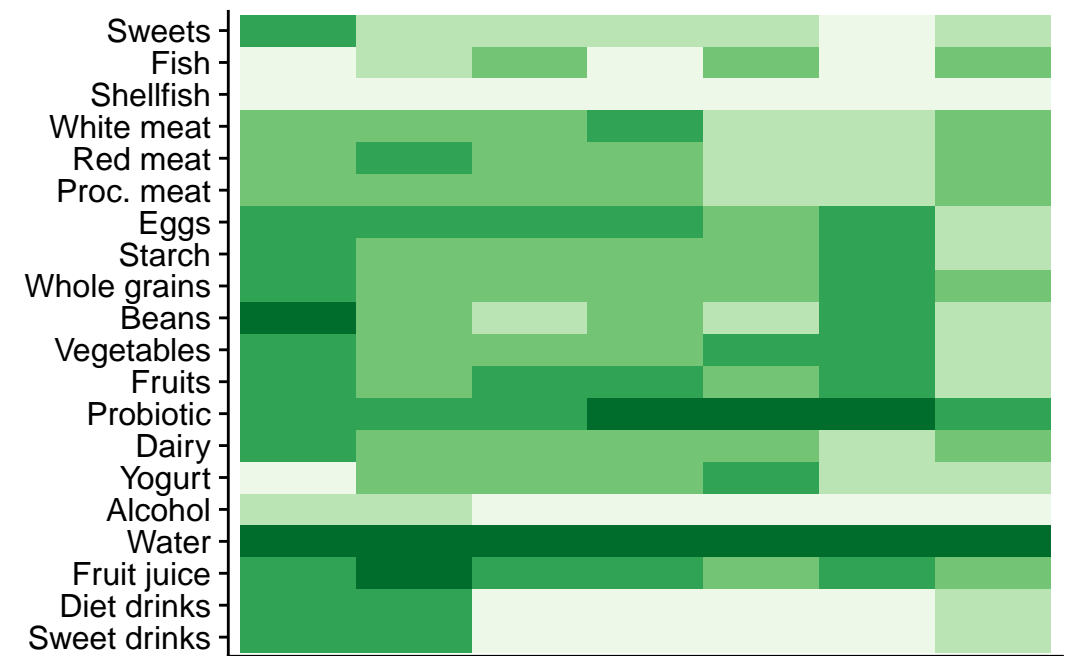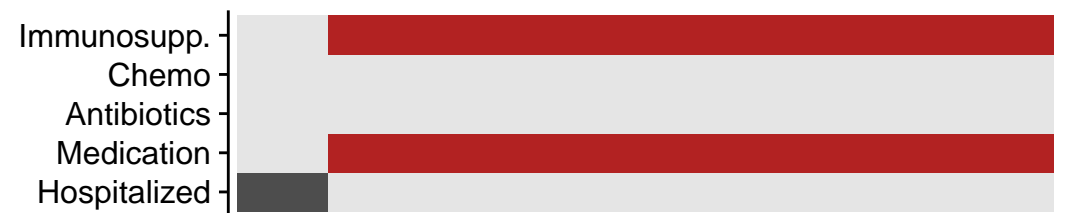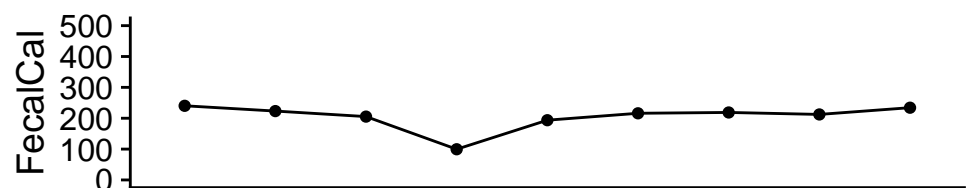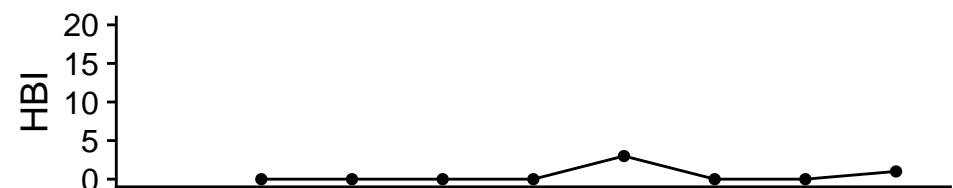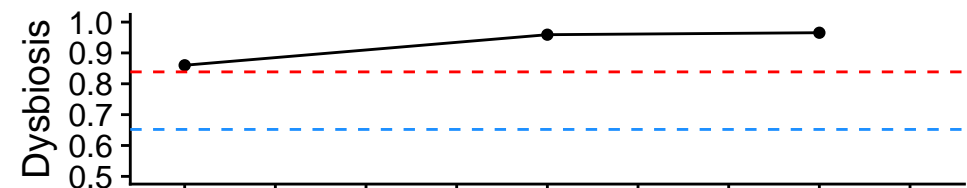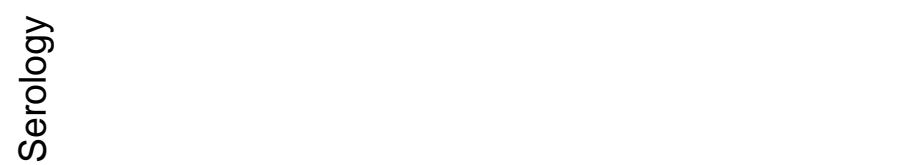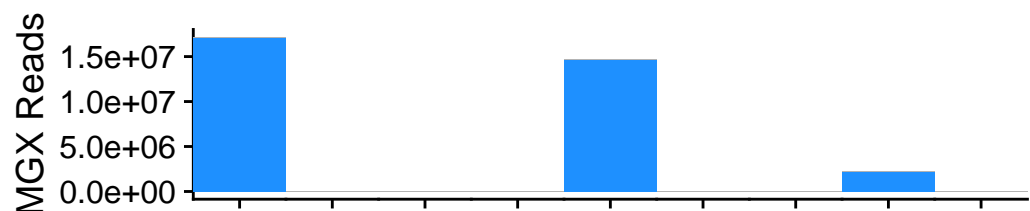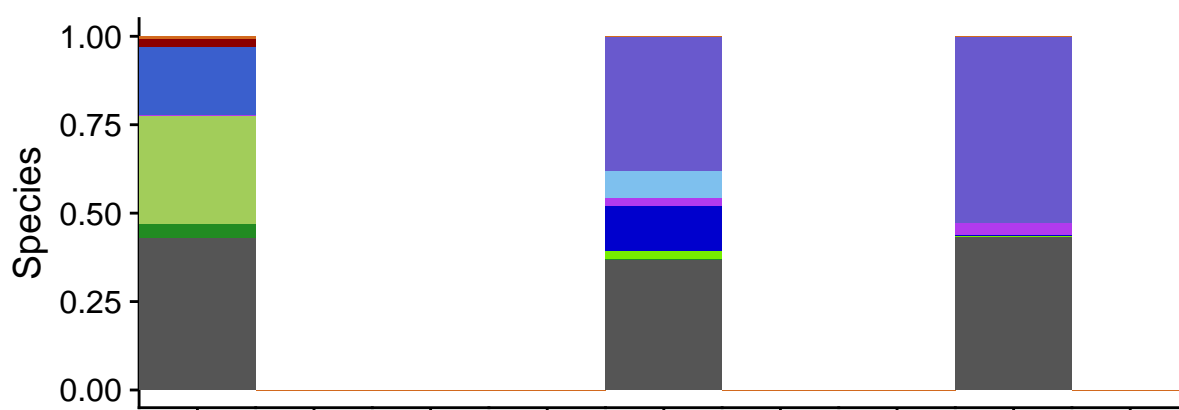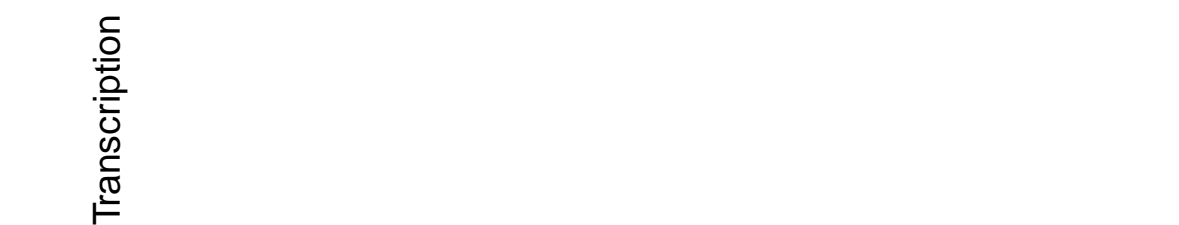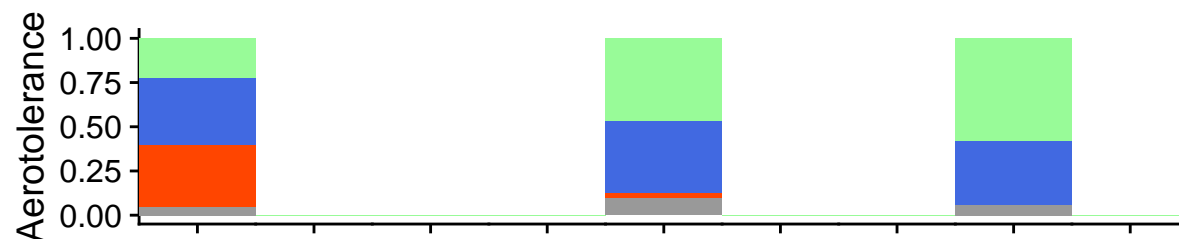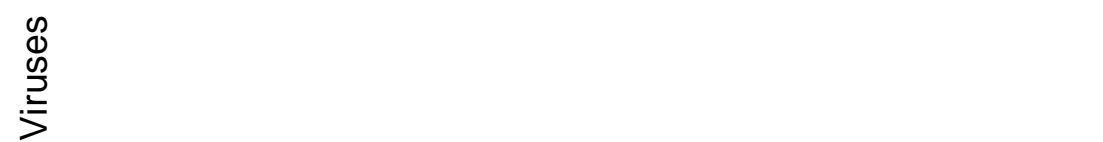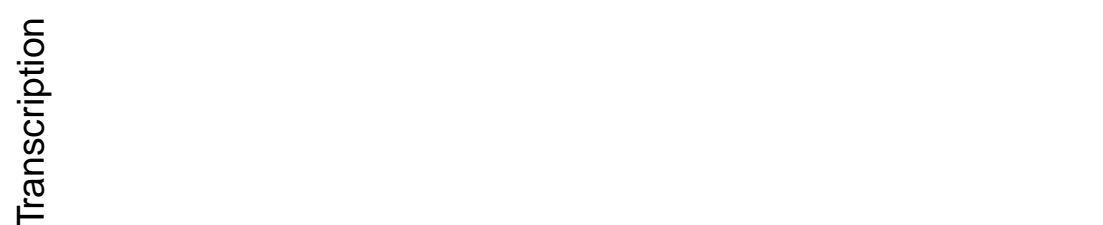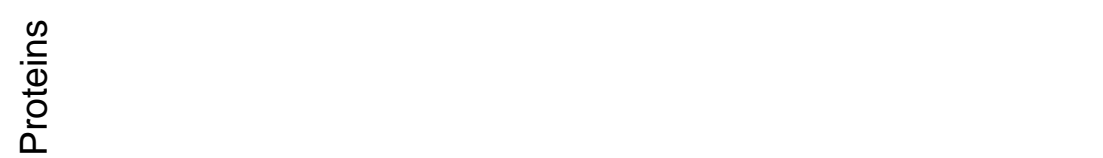

- Bacteroides vulgatus
- Prevotella copri
- Faecalibacterium prausnitzii
- Roseburia intestinalis
- Roseburia hominis
- Ruminococcus torques
- Oscillibacter unclassified
- Escherichia coli
- Klebsiella pneumoniae
- Haemophilus parainfluenzae
- other

- obligate anaerobe
- aerotolerant
- facultative anaerobe
- unknown

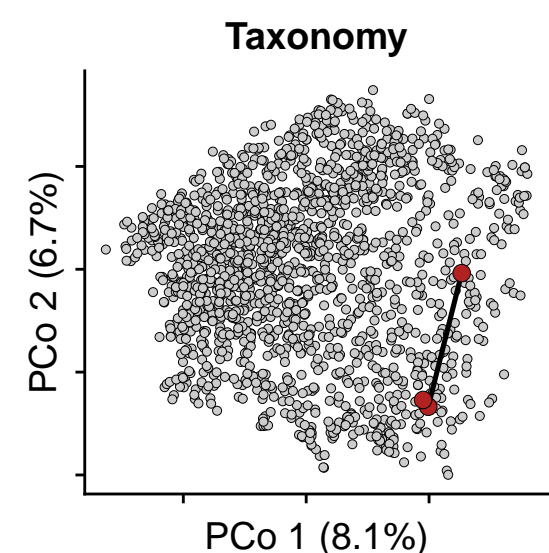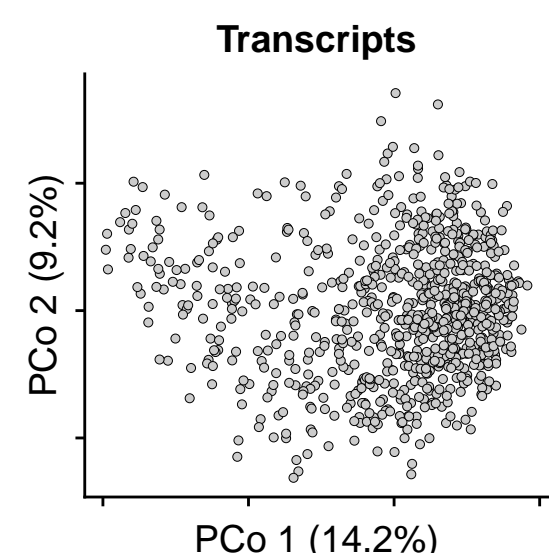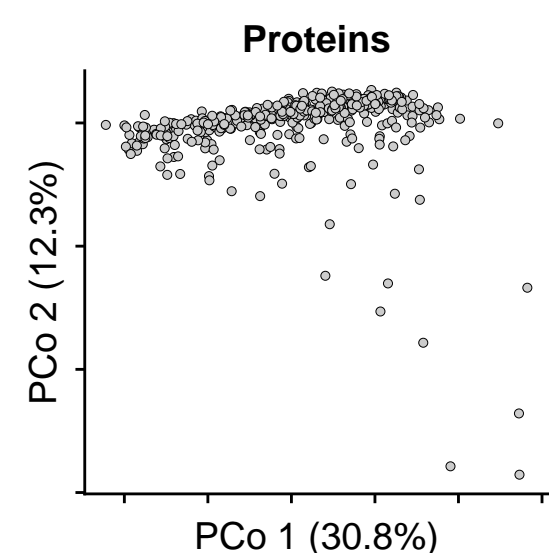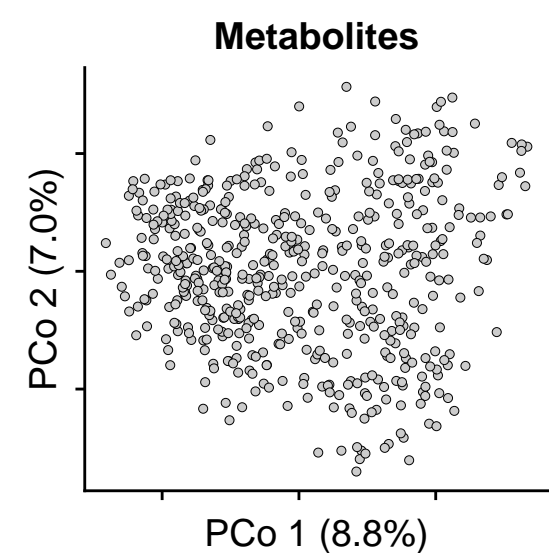

M2014: 30 Male White MGH | CD L1

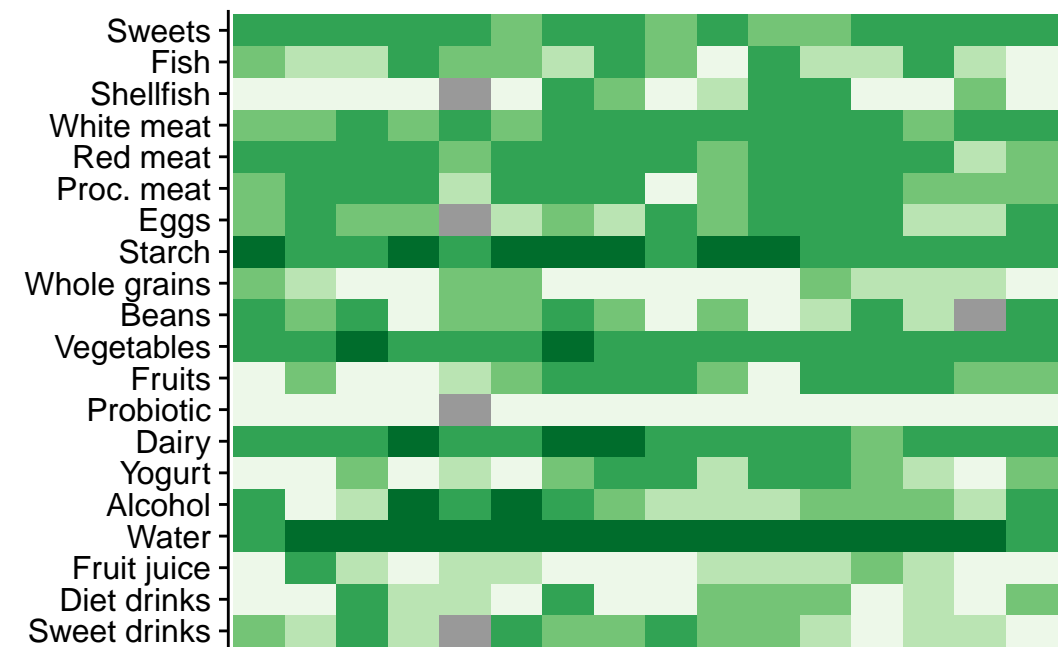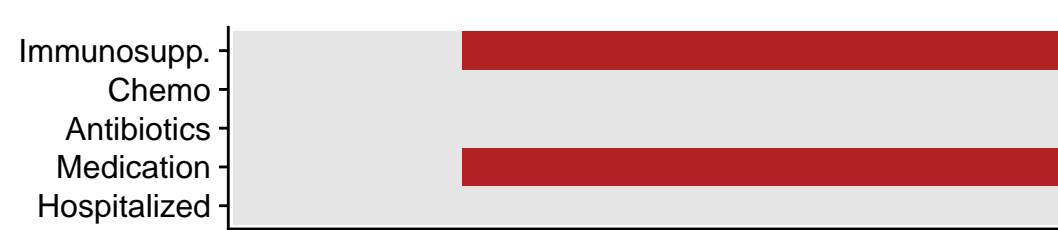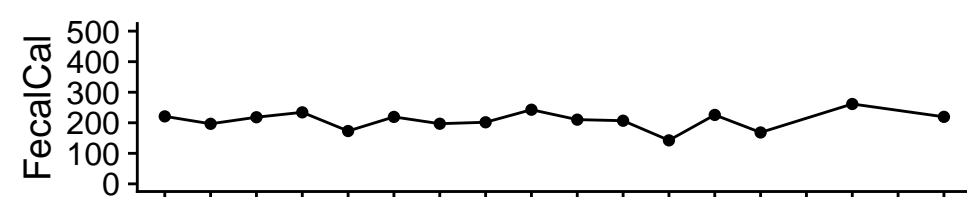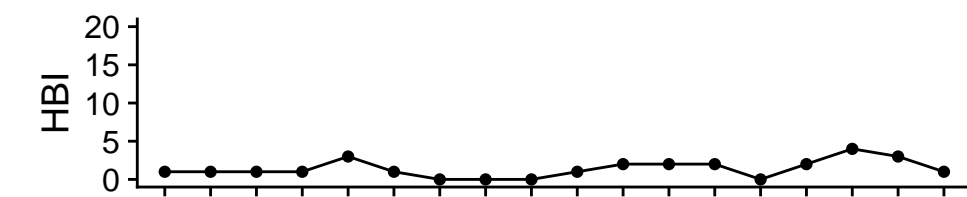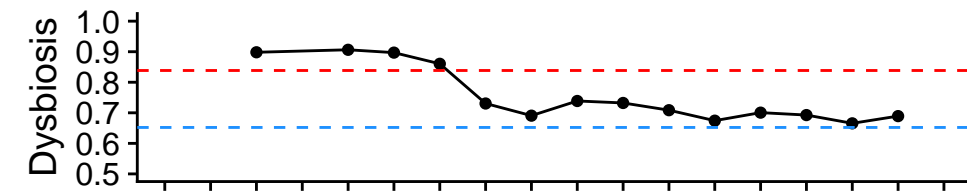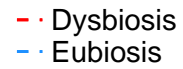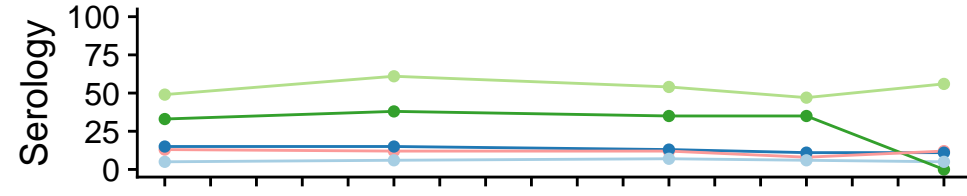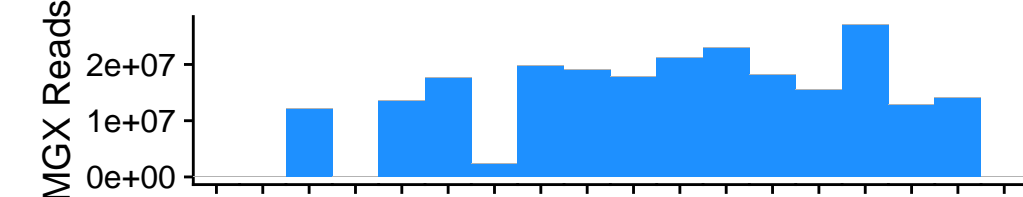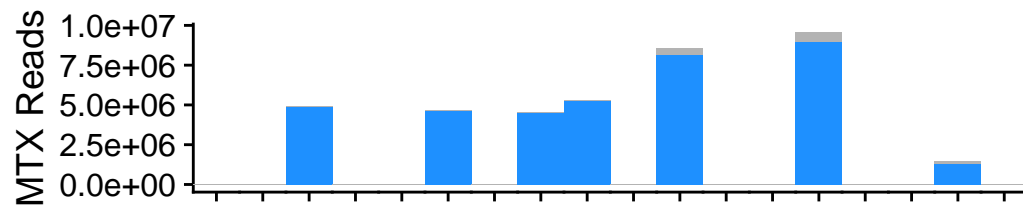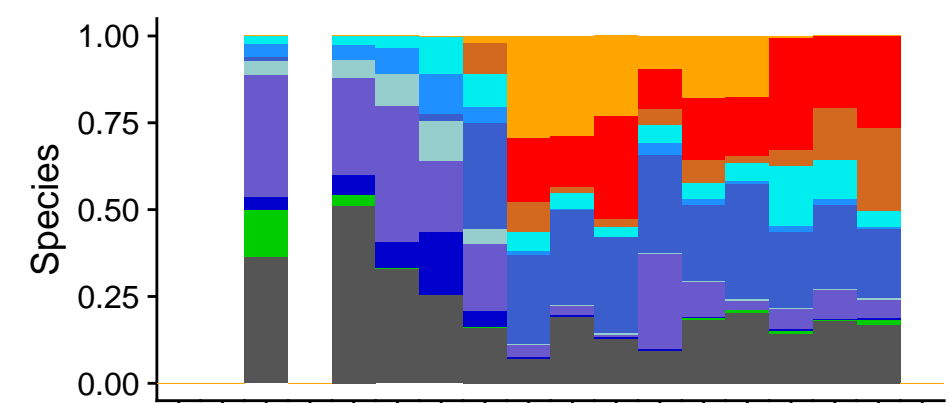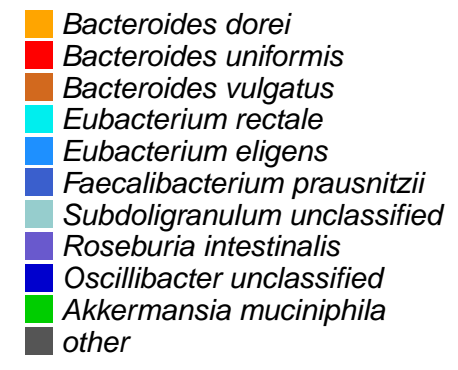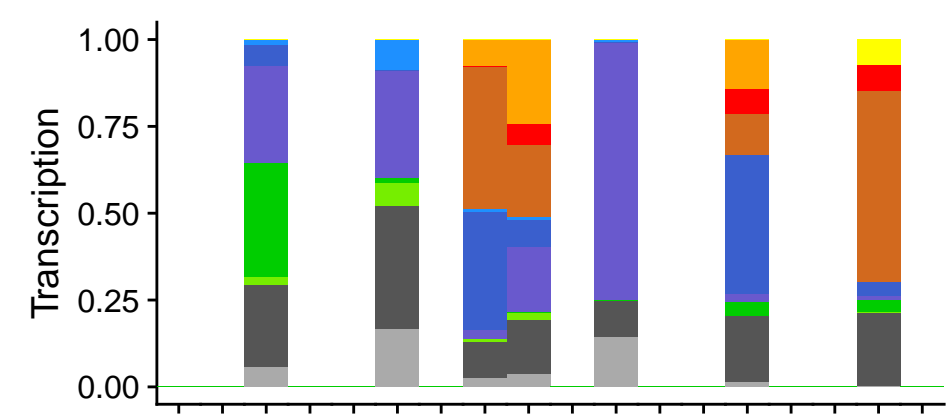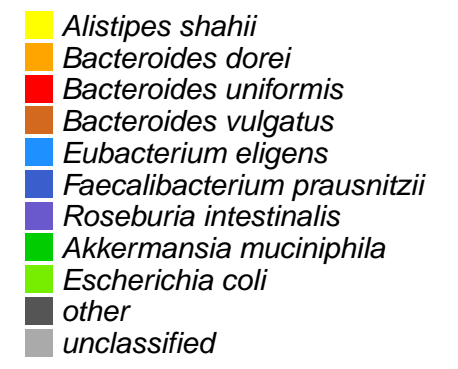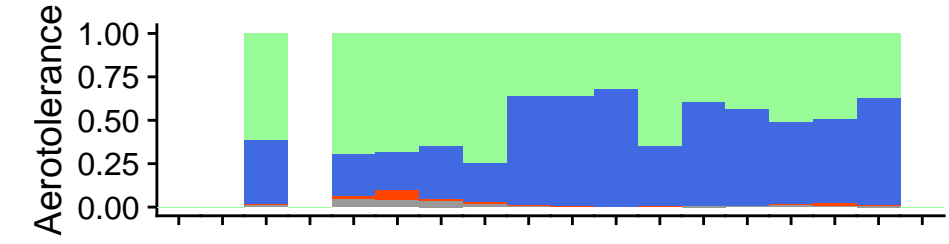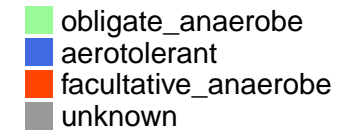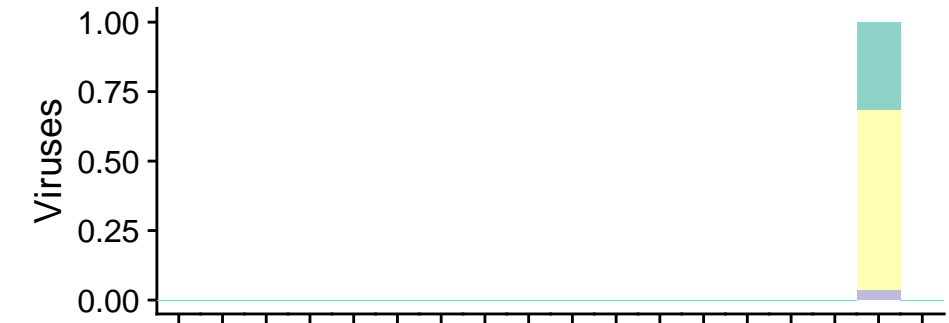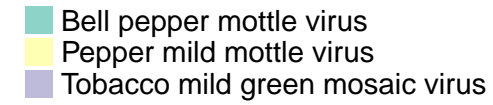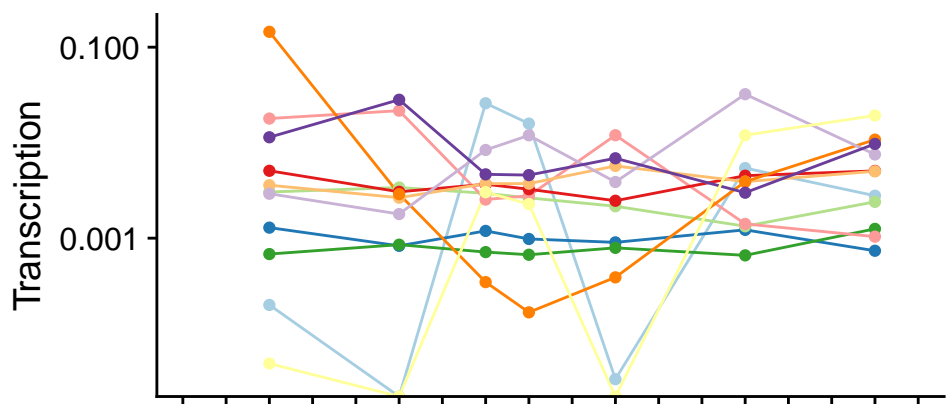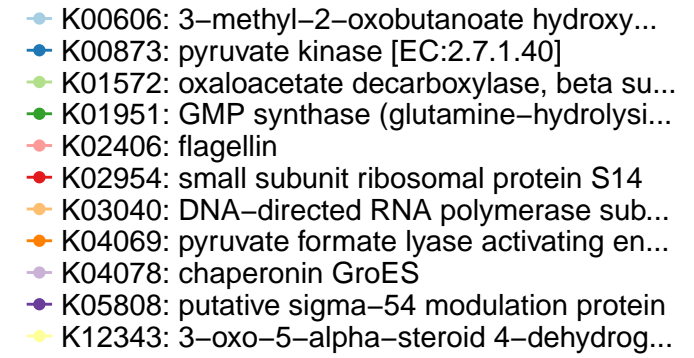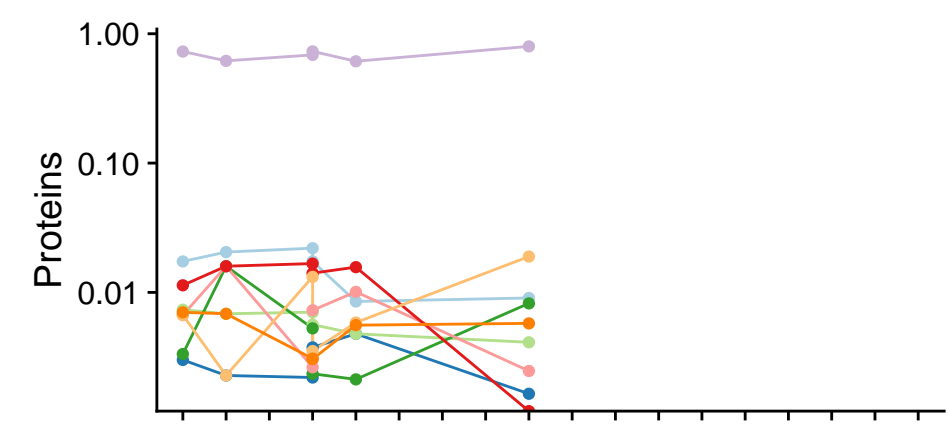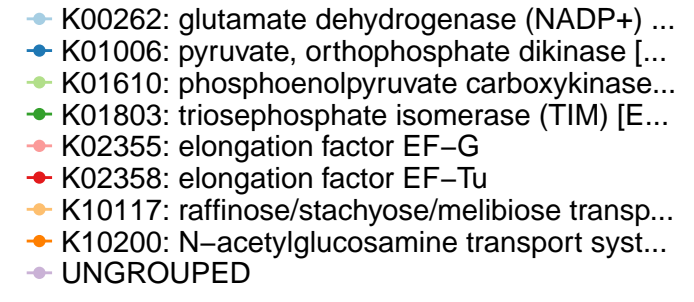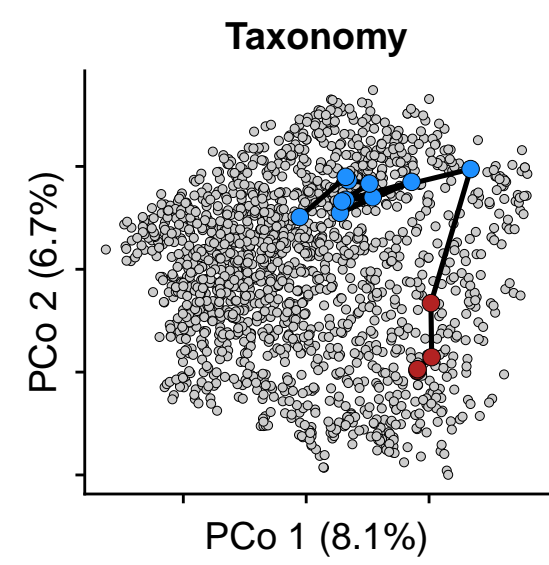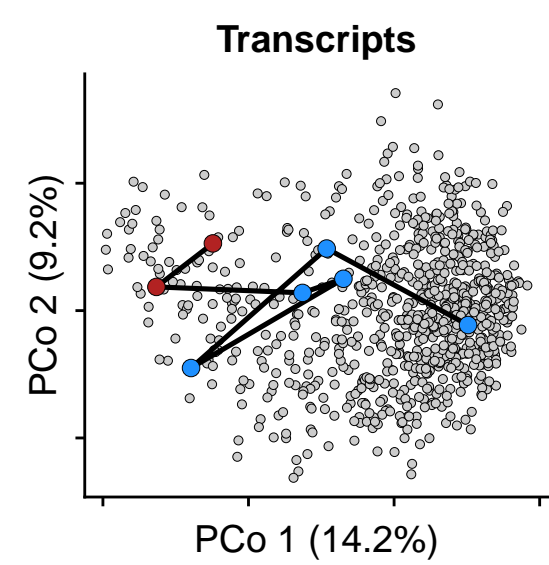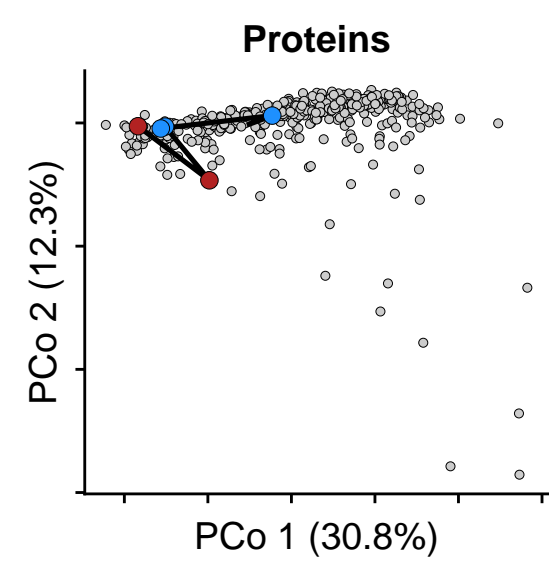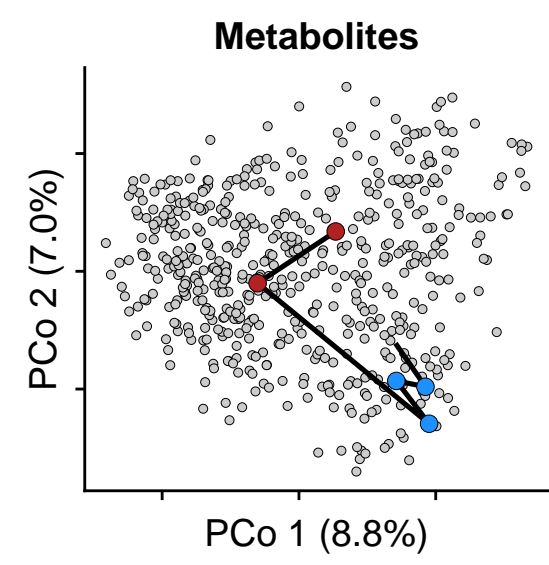

M2021: 26 Male White MGH | CD L2

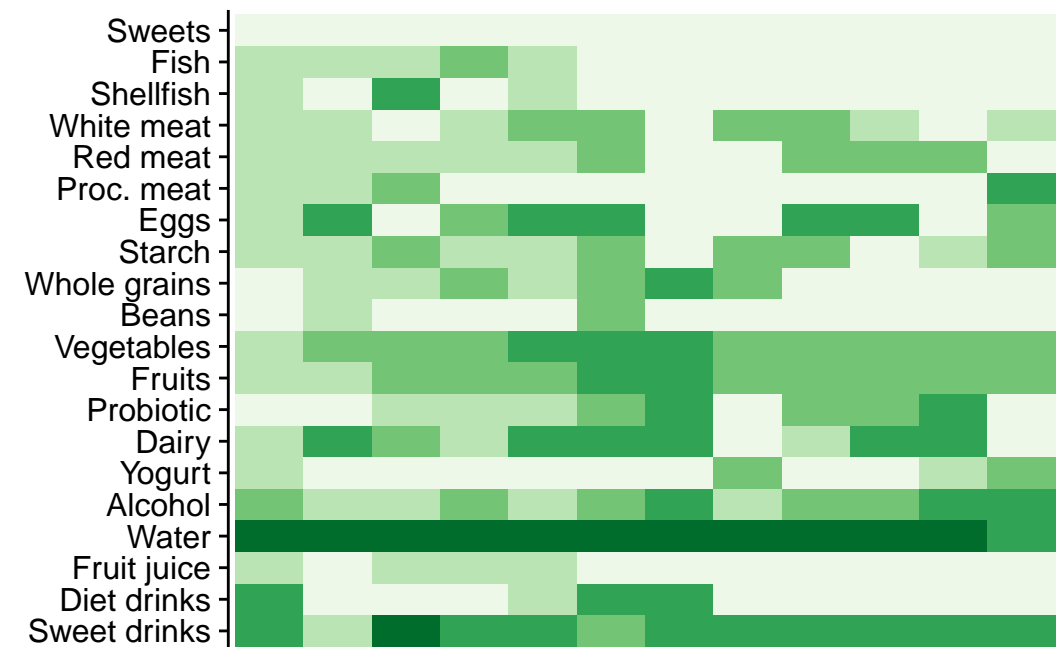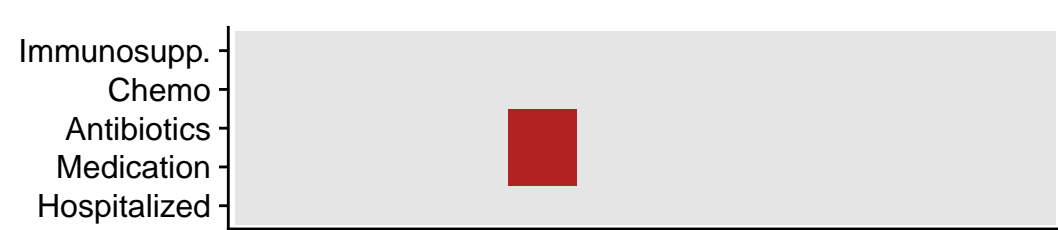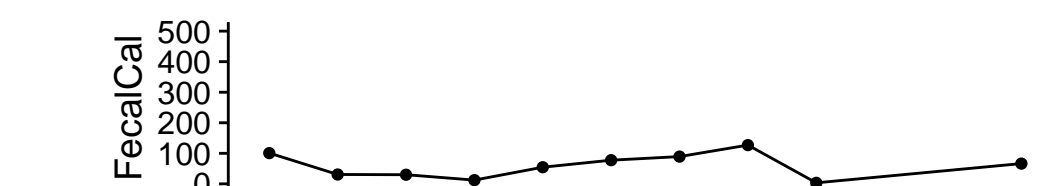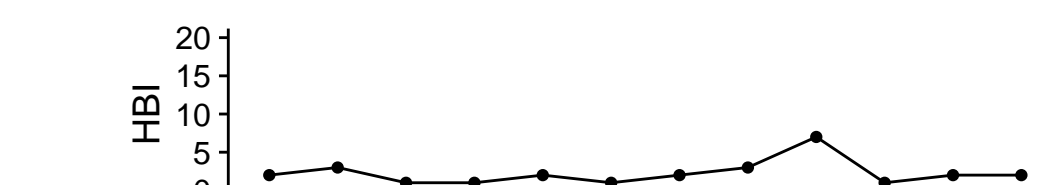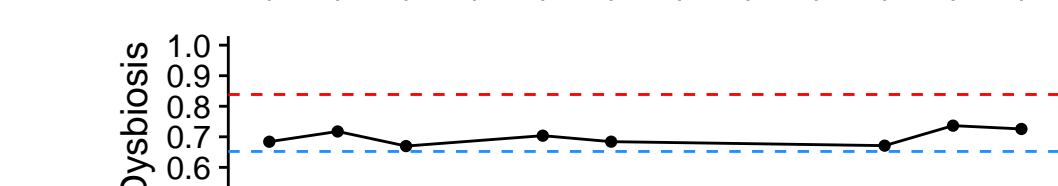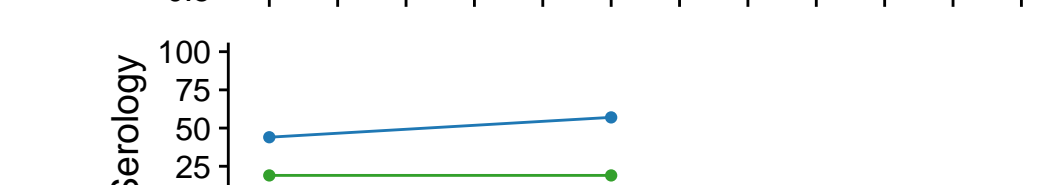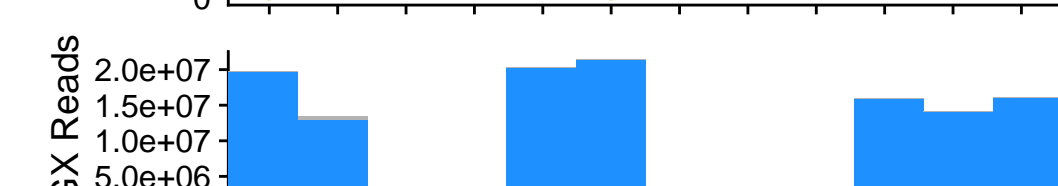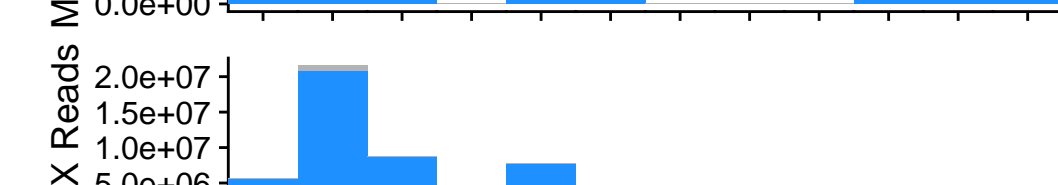

None 7+ days  
Within 4-7 days  
Within 2-3 days  
Yesterday 1-2x  
Yesterday 3x+

Yes  
No

Dysbiosis  
Eubiosis

ANCA EU  
Cbir1 EU  
IgG ASCA EU  
OmpC. EU

Human  
Filtered

Human  
Filtered

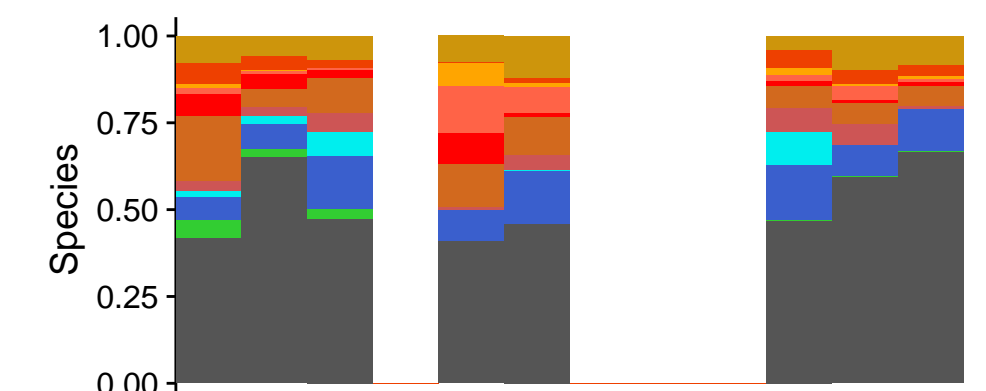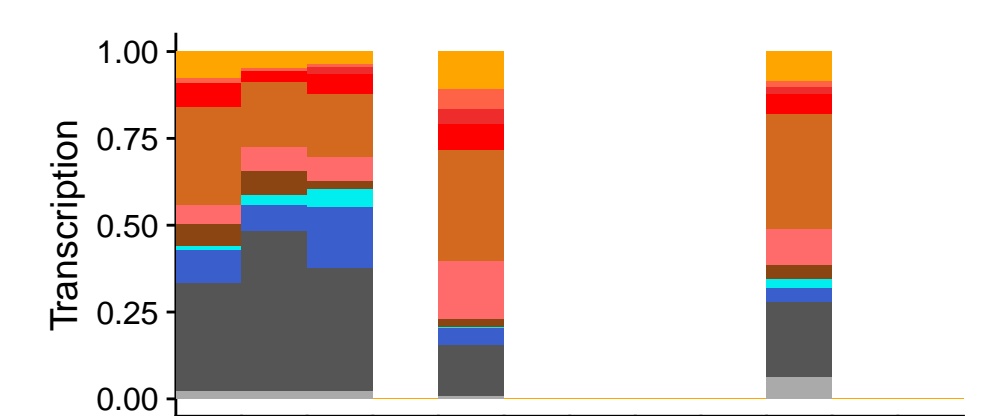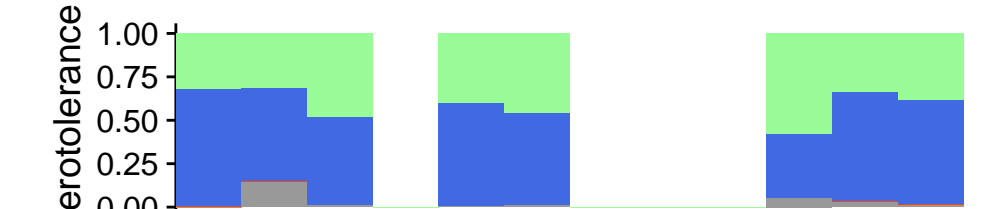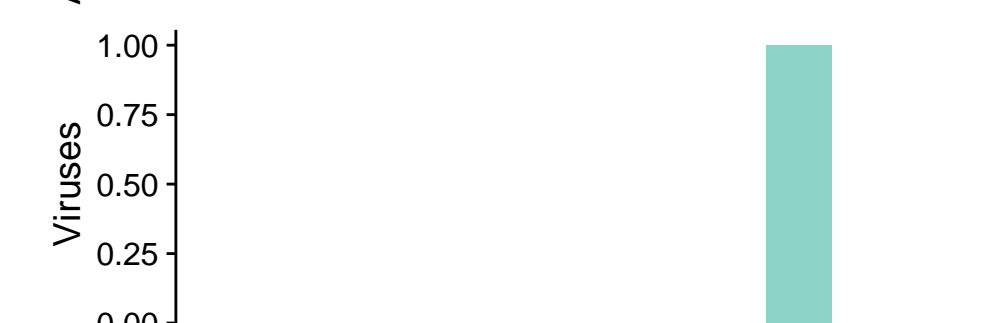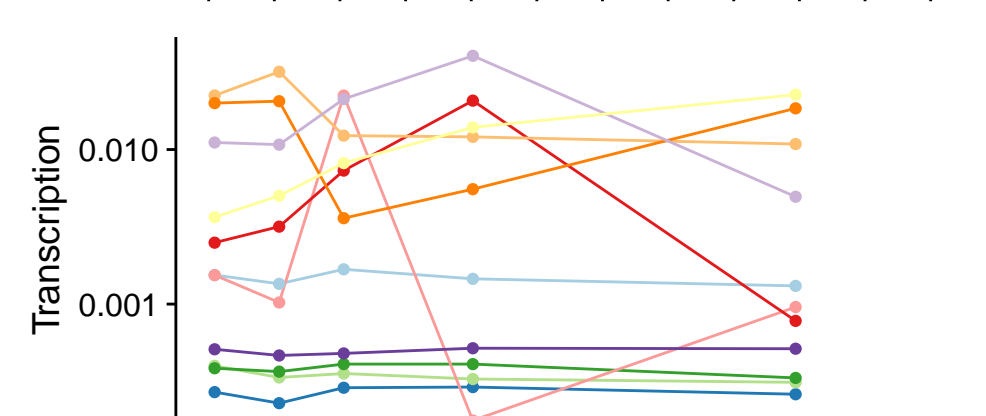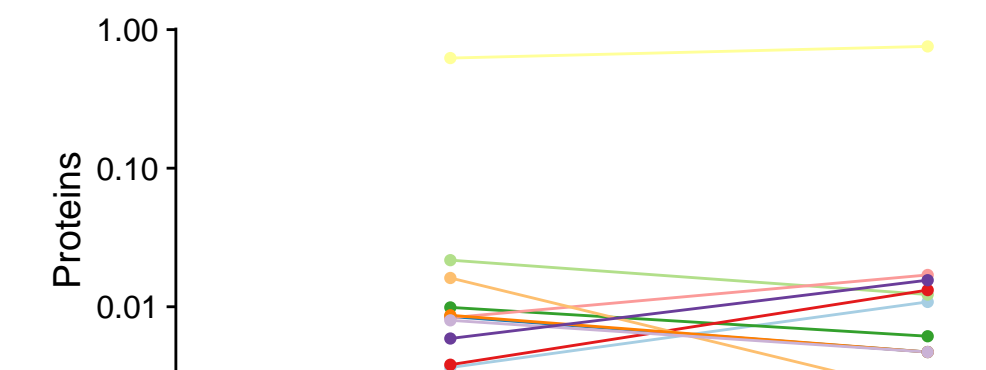

*Alistipes putredinis*  
*Bacteroides caccae*  
*Bacteroides dorei*  
*Bacteroides ovatus*  
*Bacteroides uniformis*  
*Bacteroides vulgatus*  
*Parabacteroides merdae*  
*Eubacterium rectale*  
*Faecalibacterium prausnitzii*  
*Sutterella wadsworthensis*  
other

*Bacteroides dorei*  
*Bacteroides ovatus*  
*Bacteroides thetaiotaomicron*  
*Bacteroides uniformis*  
*Bacteroides vulgatus*  
*Parabacteroides distasonis*  
*Odoribacter splanchnicus*  
*Eubacterium rectale*  
*Faecalibacterium prausnitzii*  
other  
unclassified

obligate\_anaerobe  
aerotolerant  
facultative\_anaerobe  
unknown

TTV-like mini virus

K00174: 2-oxoglutarate/2-oxoacid ferredoxin...  
K00798: cob(I)alamin adenosyltransferase [E...  
K00979: 3-deoxy-manno-octulosonate cytid...  
K02004: NO\_NAME  
K02406: flagellin  
K02519: translation initiation factor IF-2  
K02935: large subunit ribosomal protein L7/L...  
K02956: small subunit ribosomal protein S15  
K02982: small subunit ribosomal protein S3  
K03614: electron transport complex protein R...  
K13993: HSP20 family protein

K00024: malate dehydrogenase [EC:1.1.1.37]  
K00134: glyceraldehyde 3-phosphate dehydr...  
K00262: glutamate dehydrogenase (NADP+) ...  
K01610: phosphoenolpyruvate carboxykinase...  
K01805: xylose isomerase [EC:5.3.1.5]  
K01812: glucuronate isomerase [EC:5.3.1.12]  
K02358: elongation factor EF-Tu  
K04043: molecular chaperone DnaK  
K04077: chaperonin GroEL  
K10117: raffinose/stachyose/melibiose transp...  
UNGROUPED

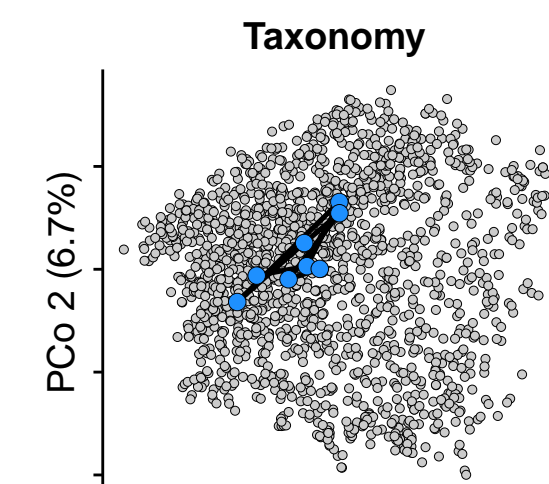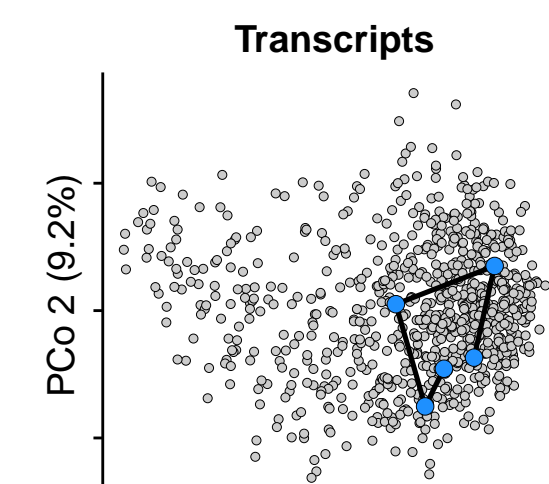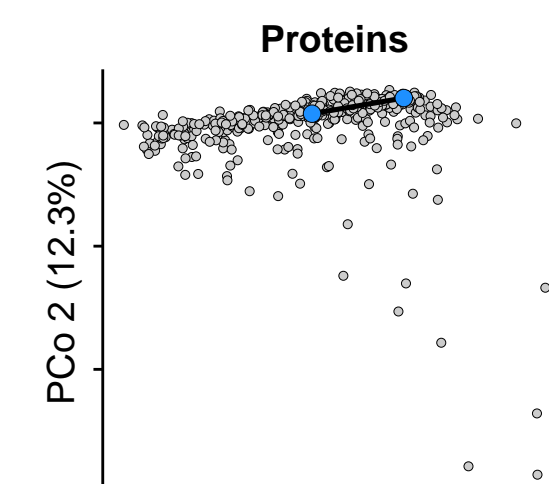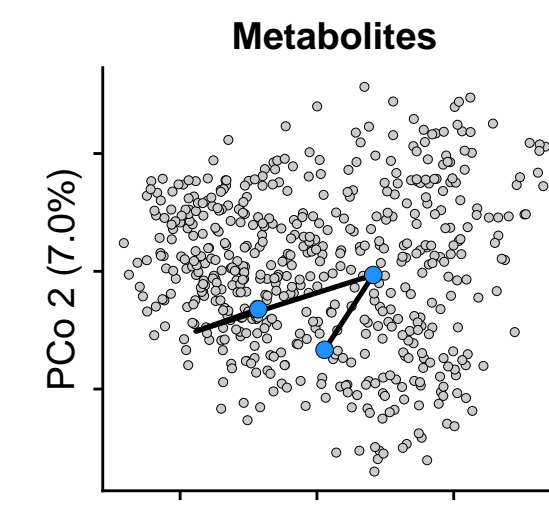

Taxonomy

Transcripts

Proteins

Metabolites

M2025: 43 Female White MGH | CD L2

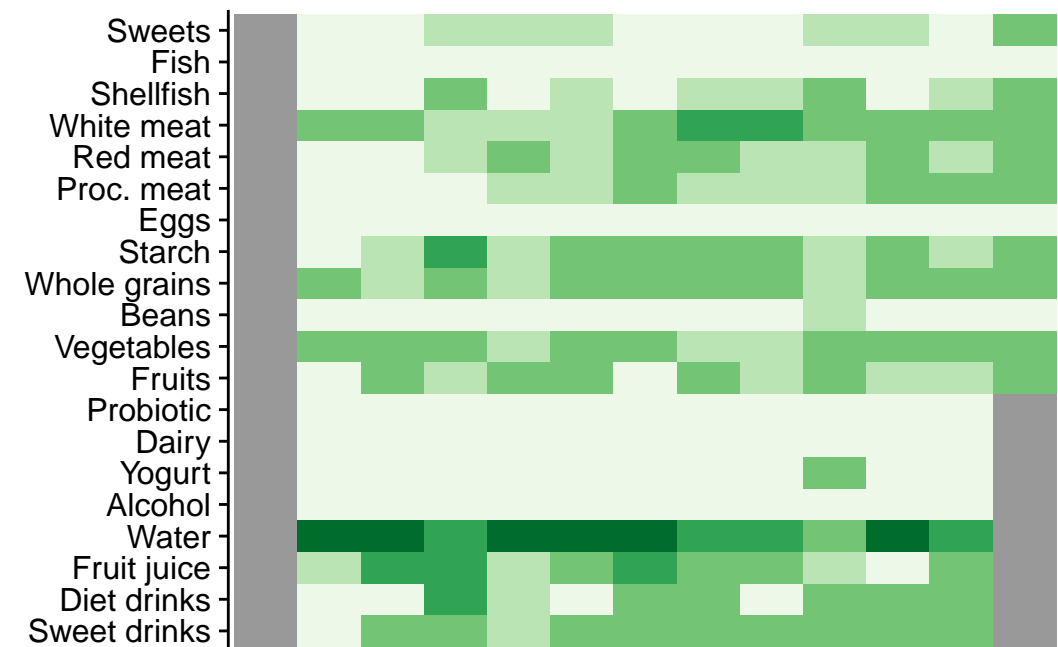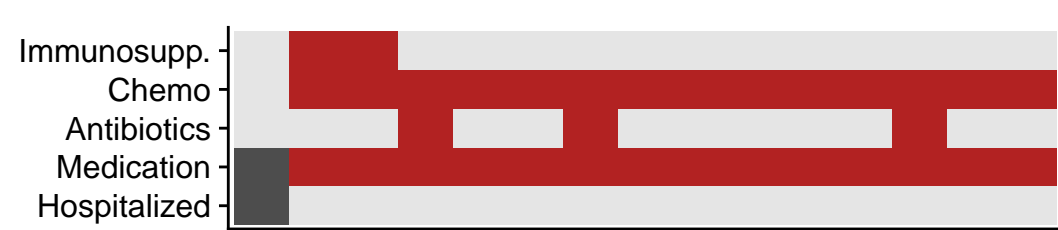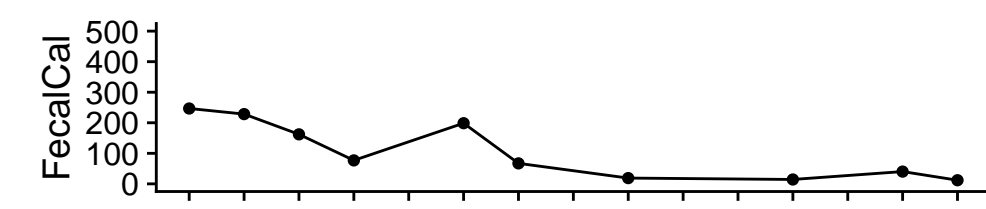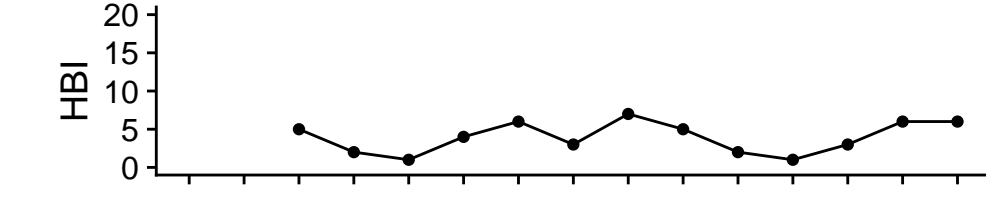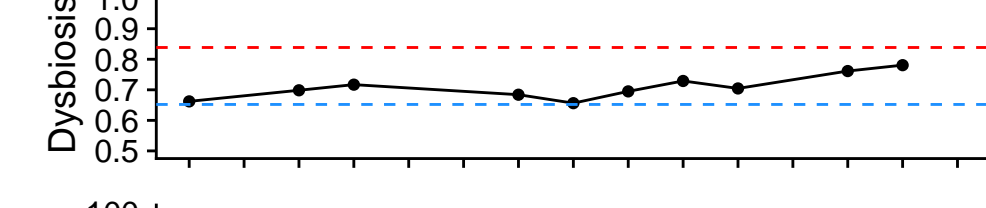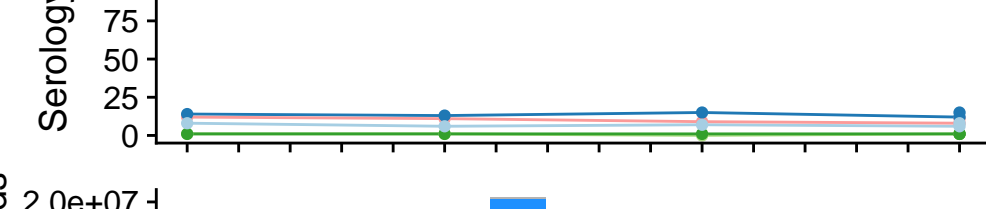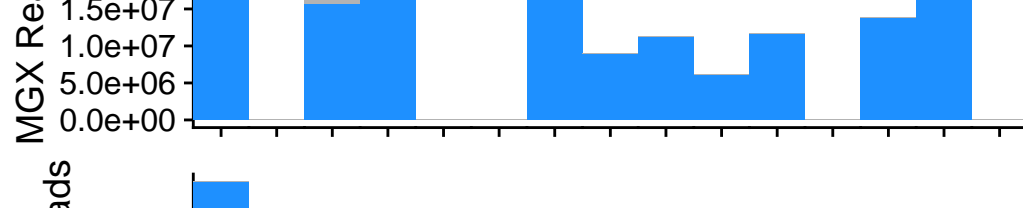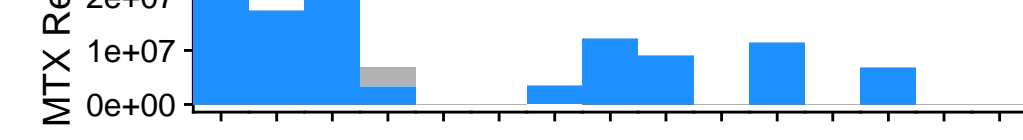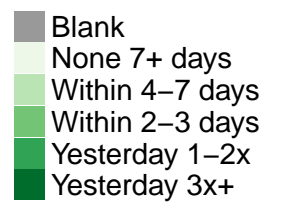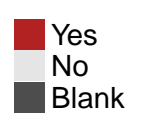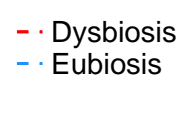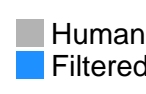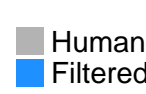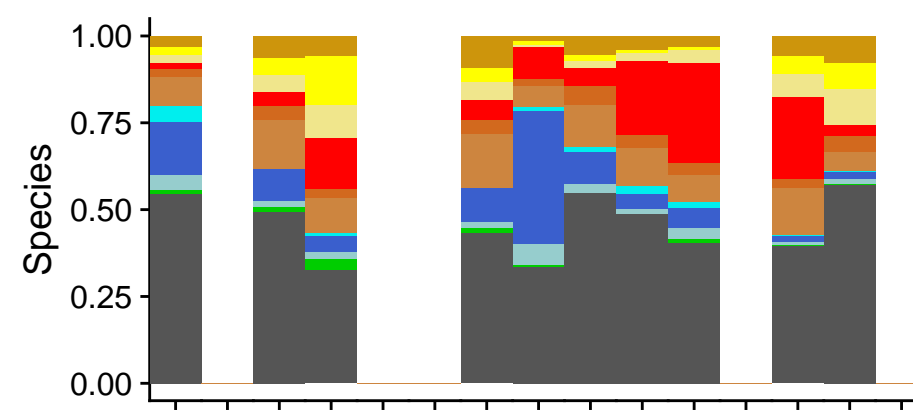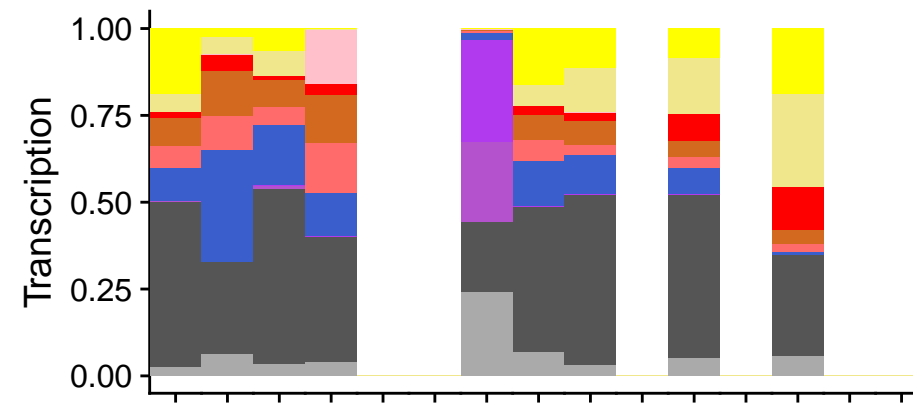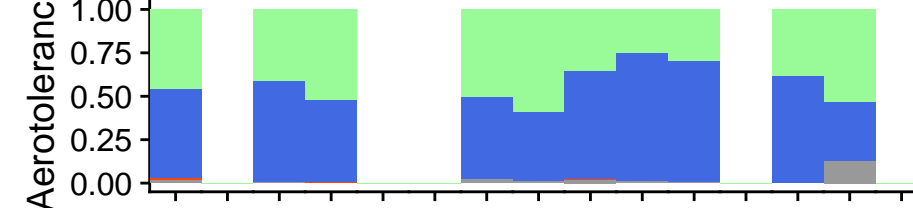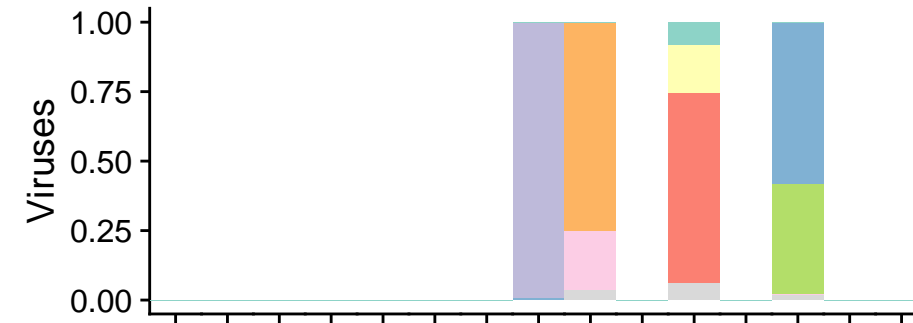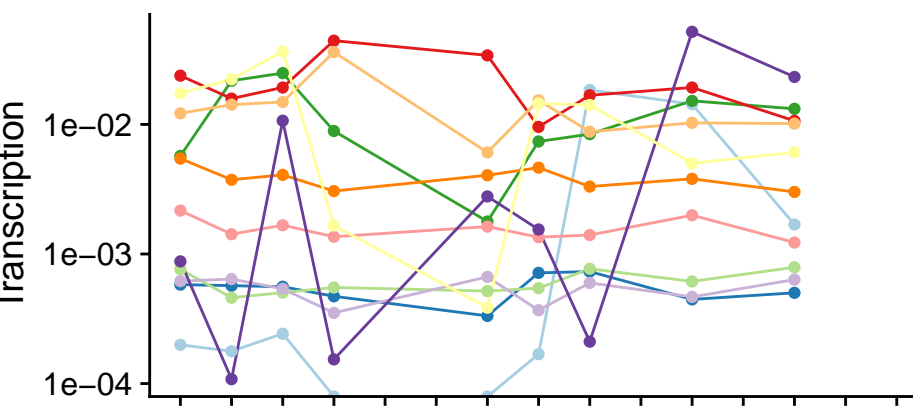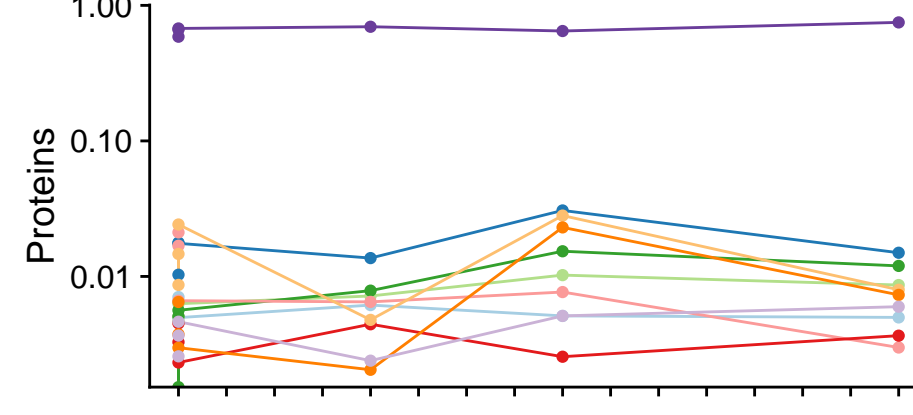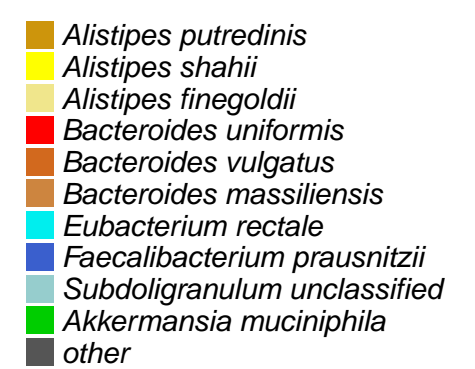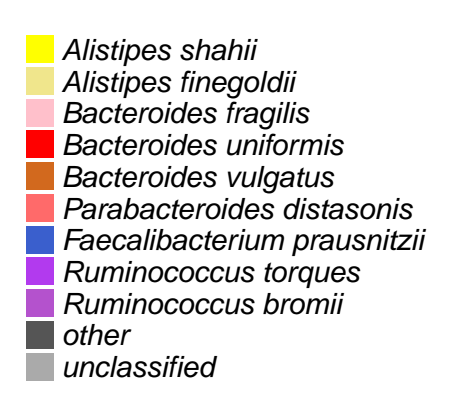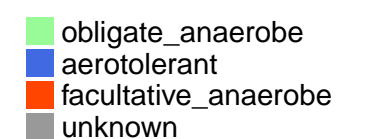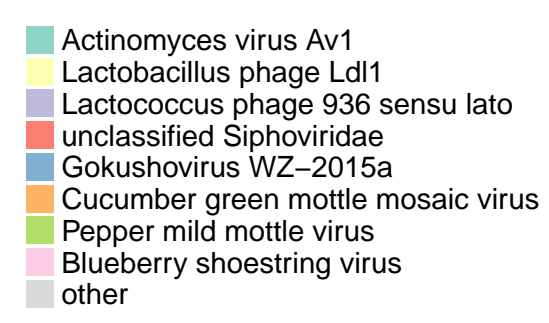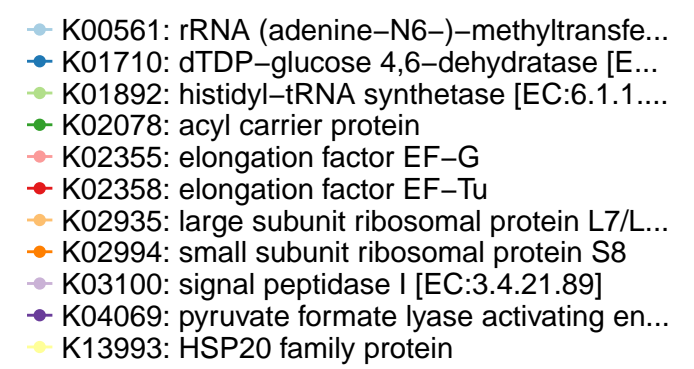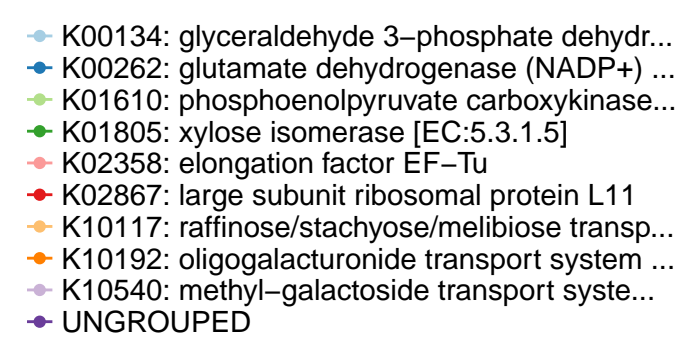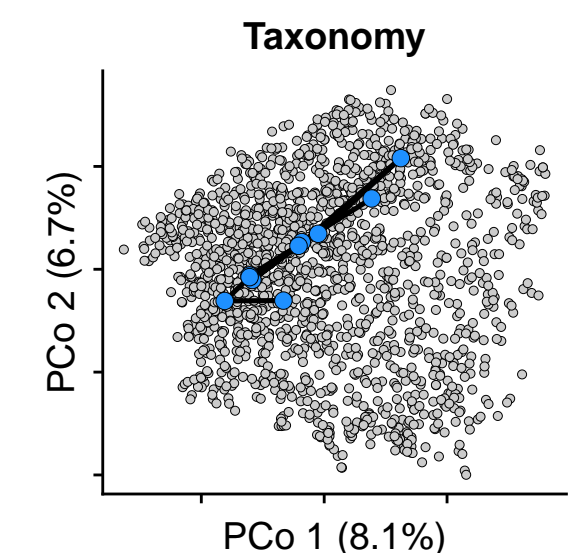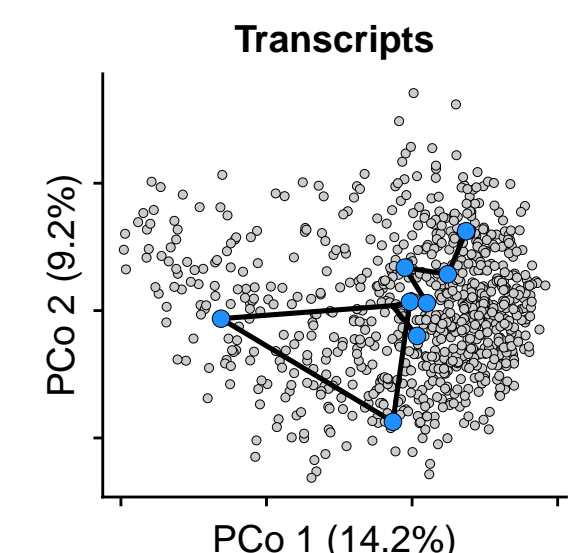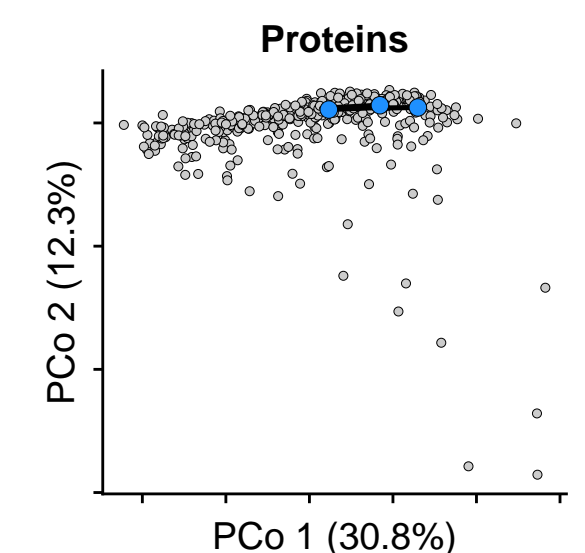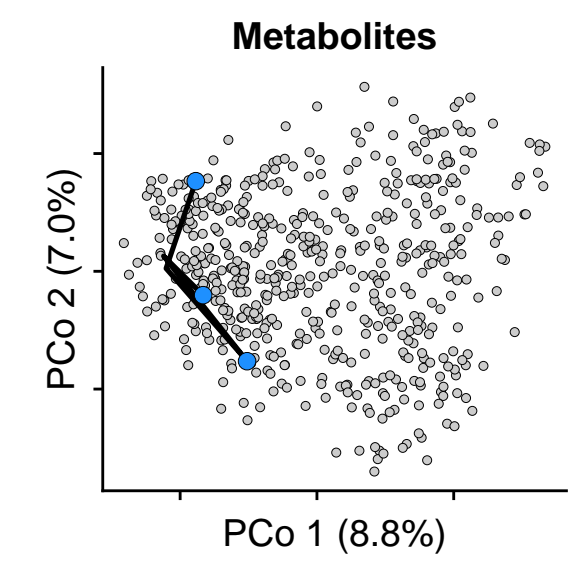



M2026: 21 Female White MGH | UC

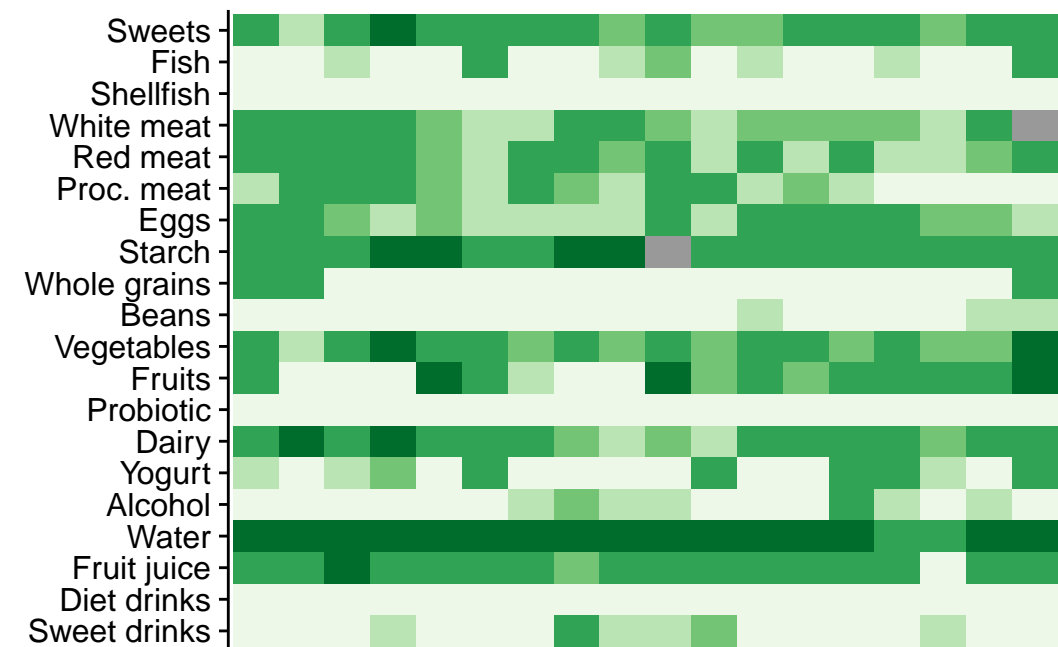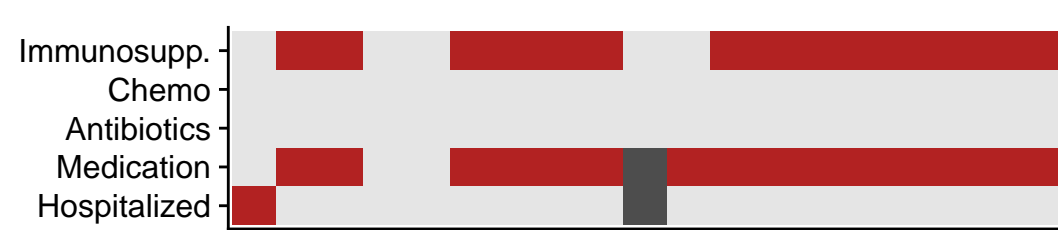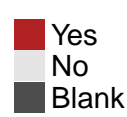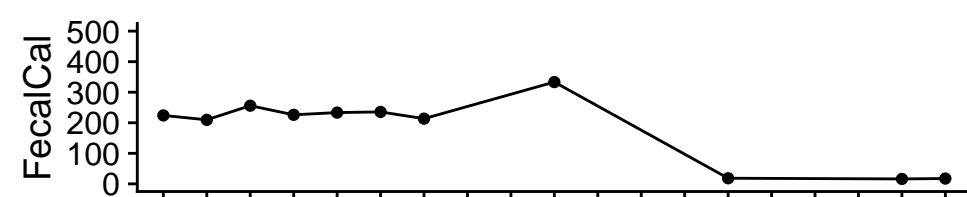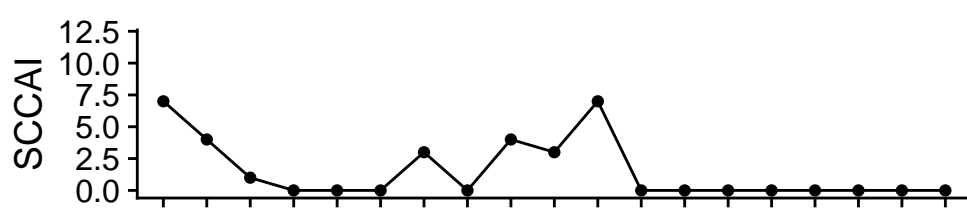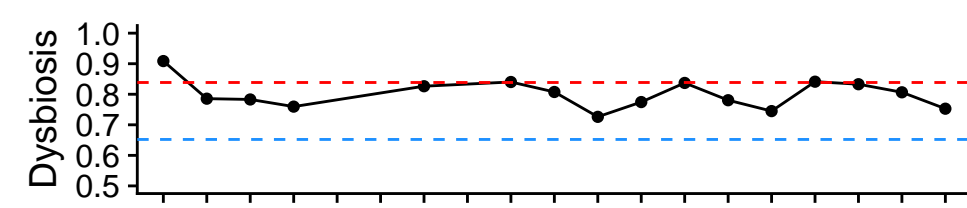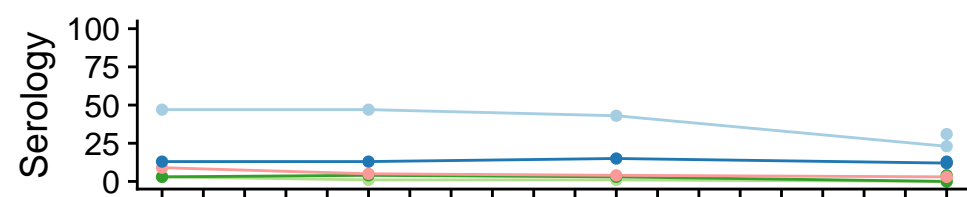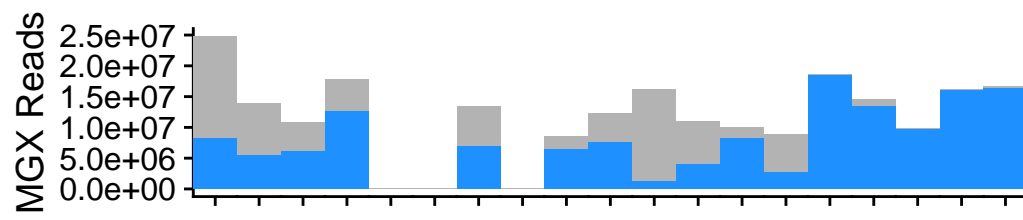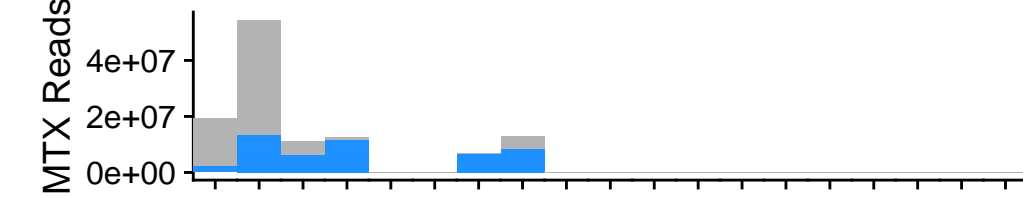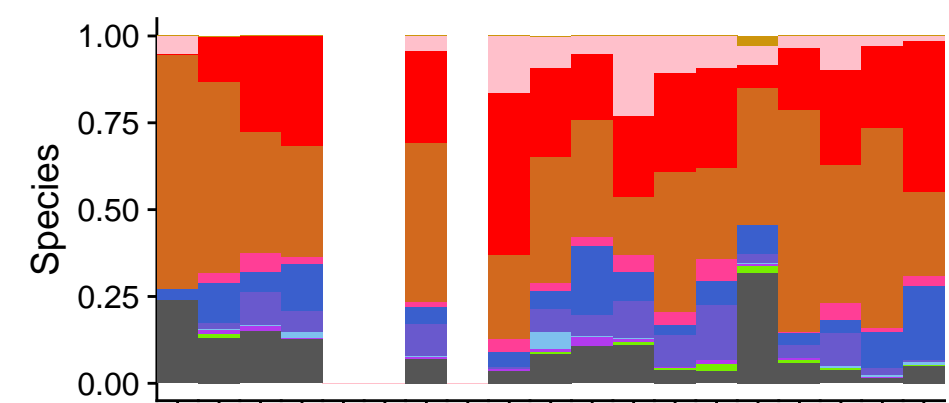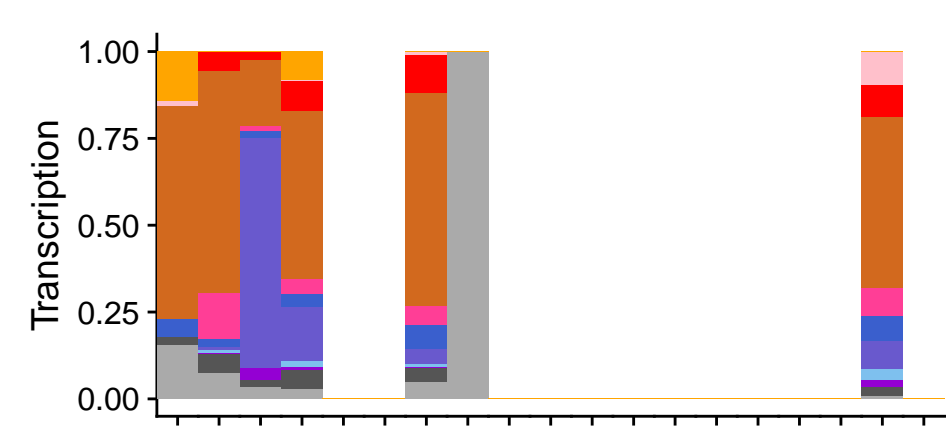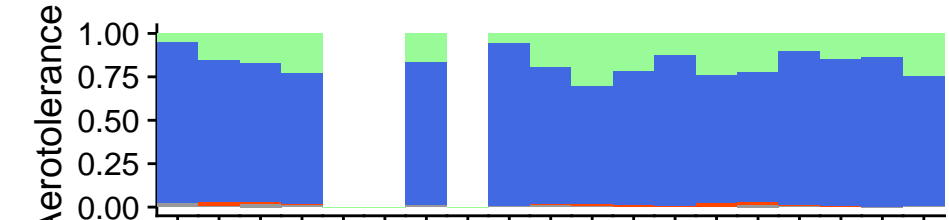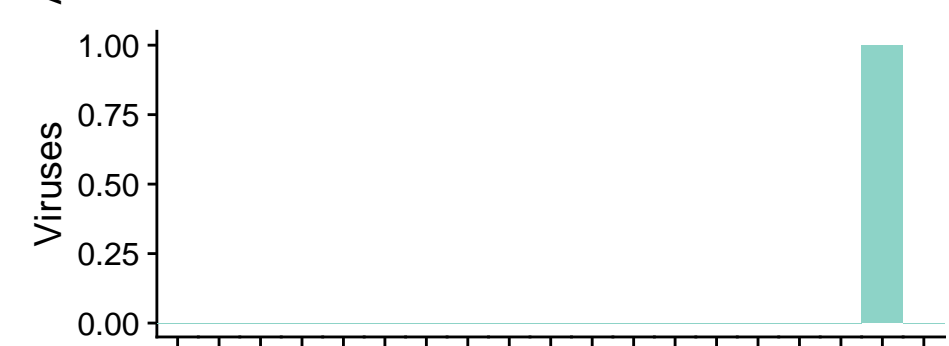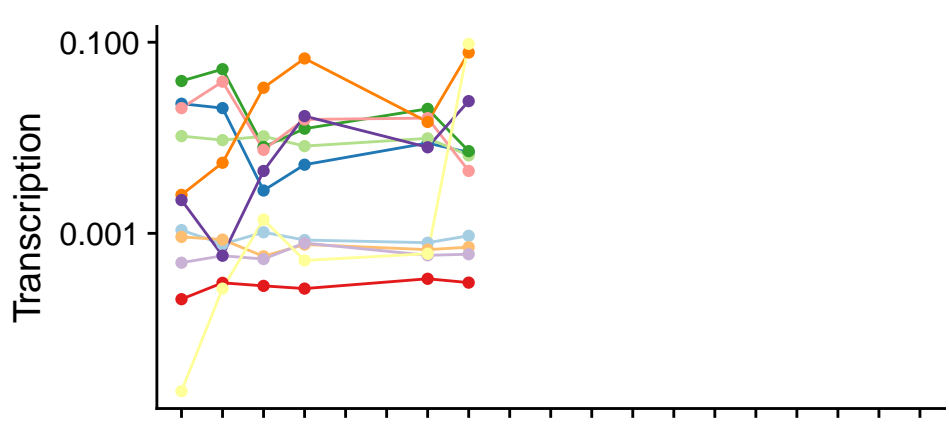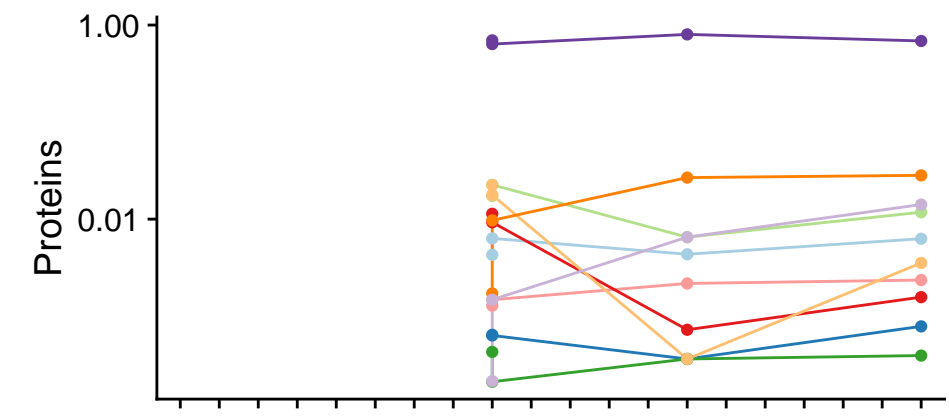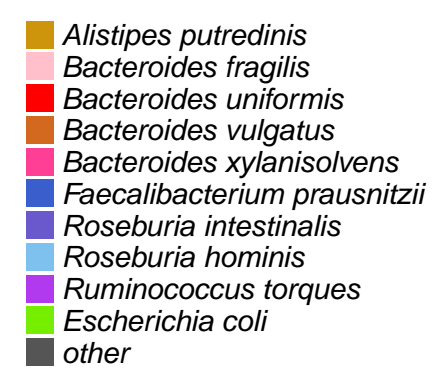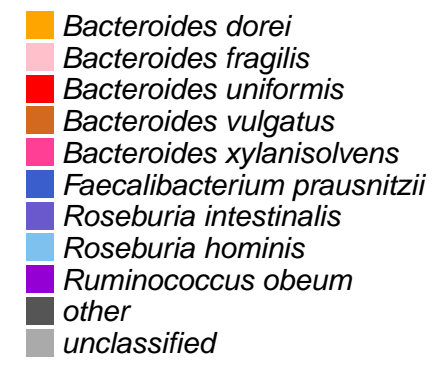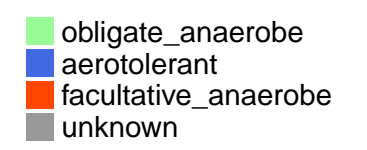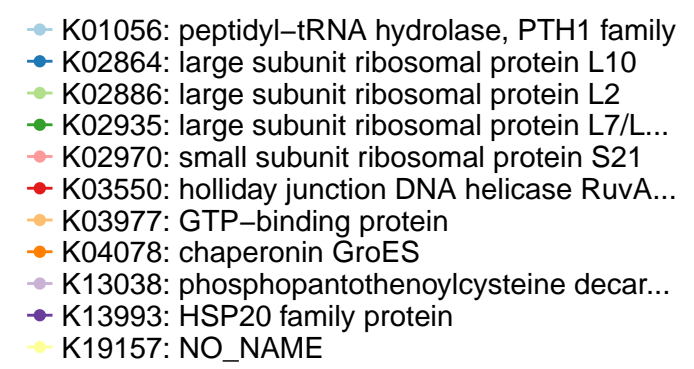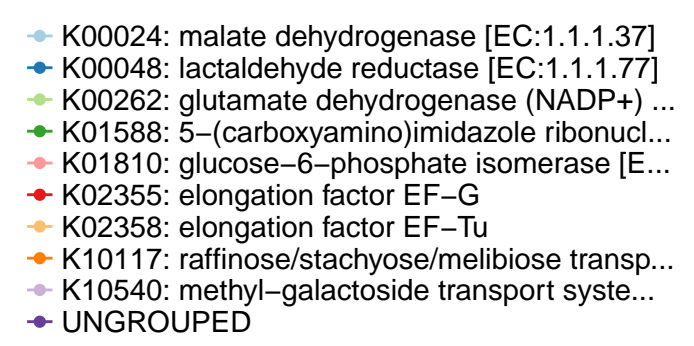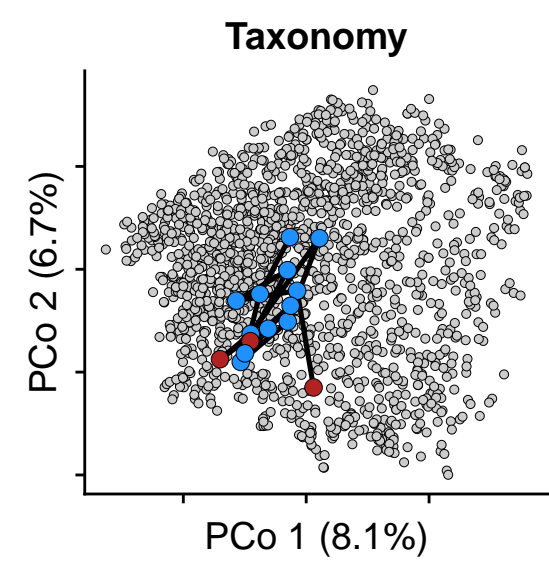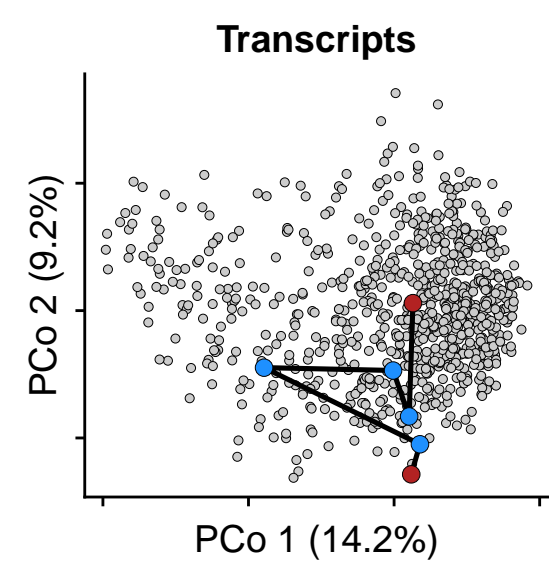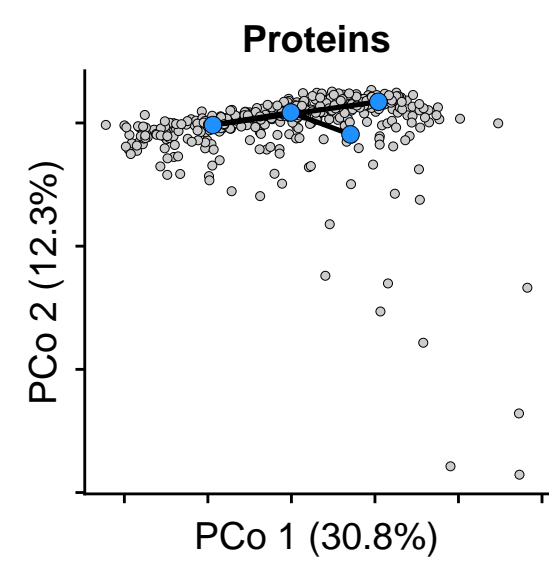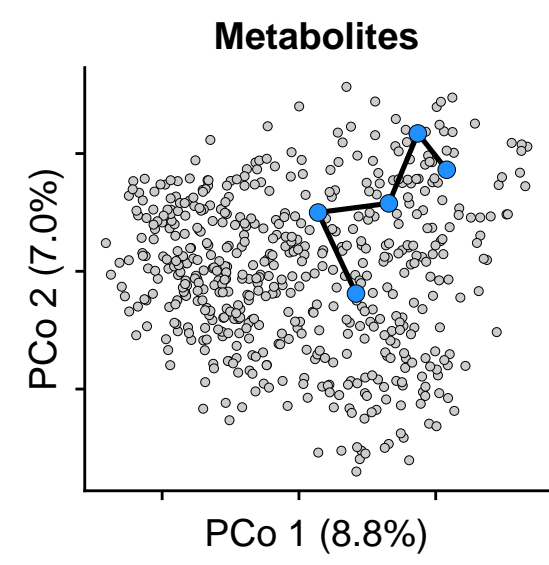

M2027: 41 Male Other MGH | CD L1

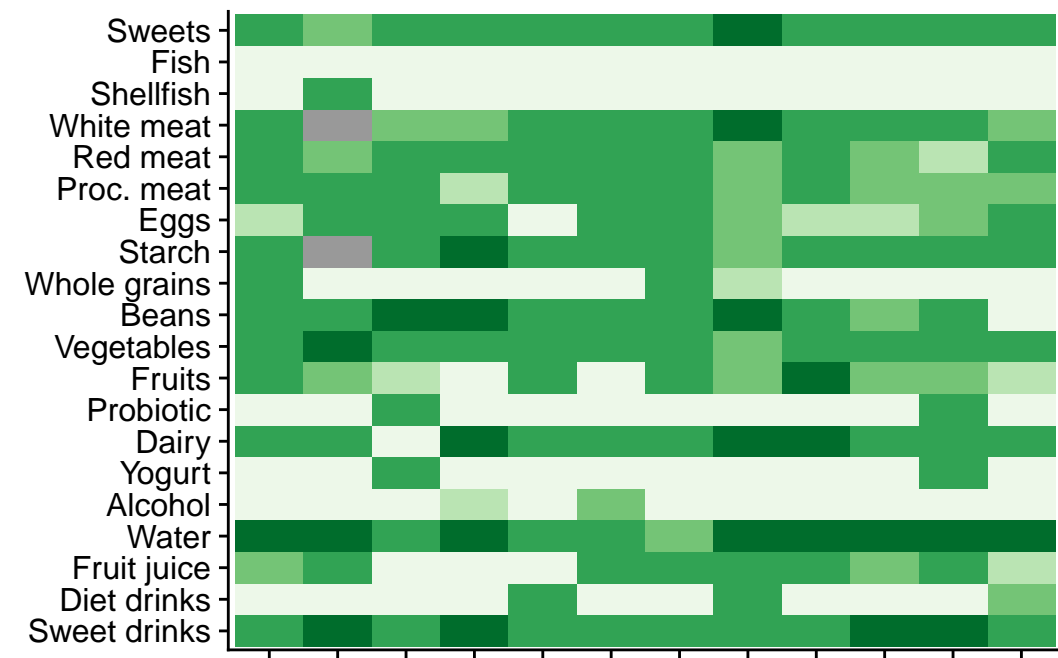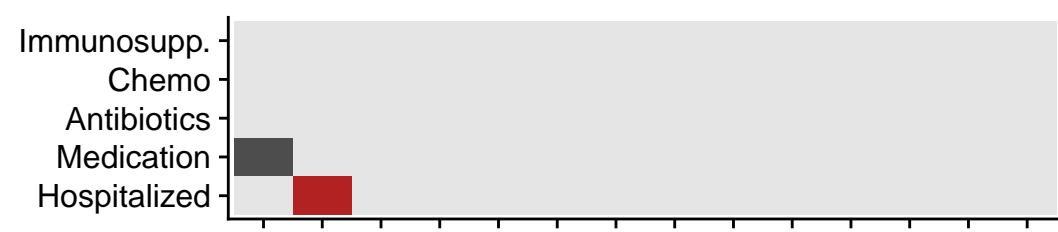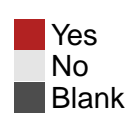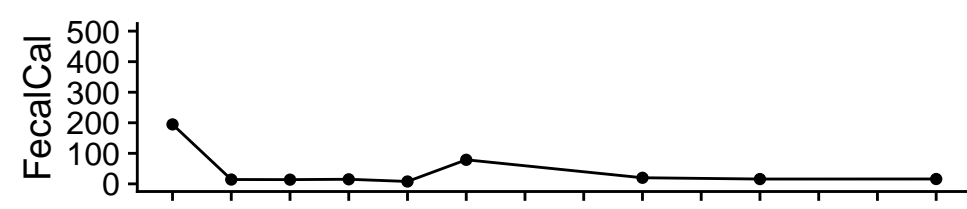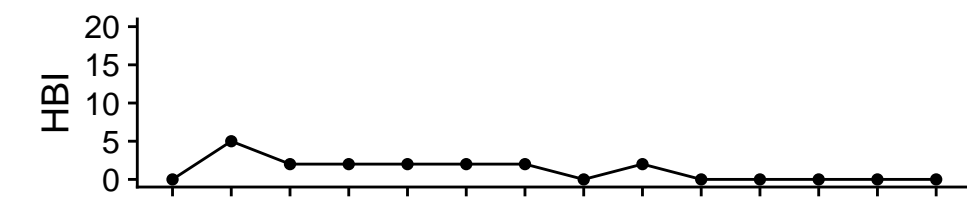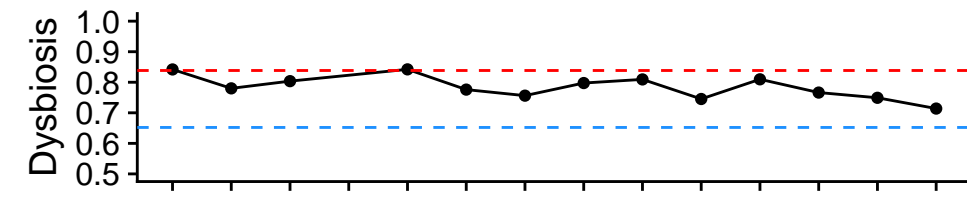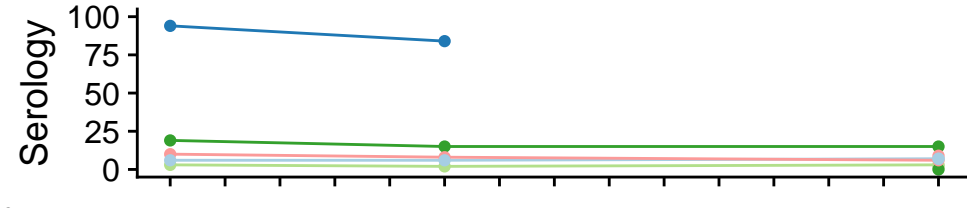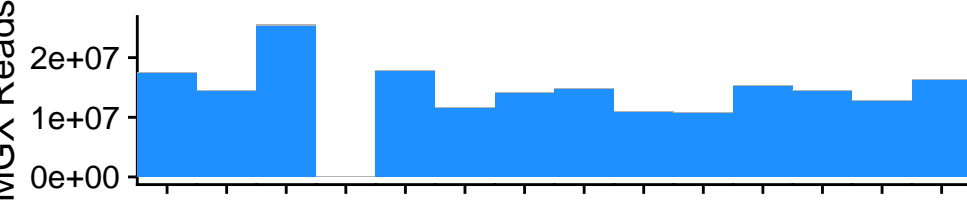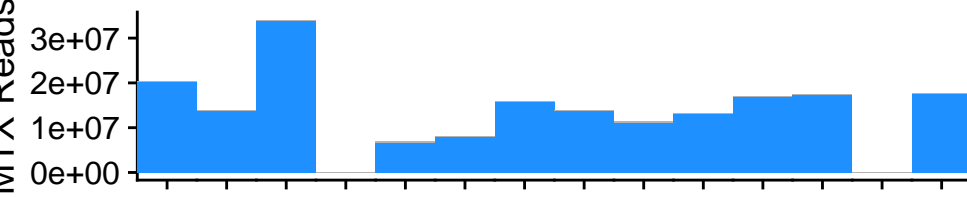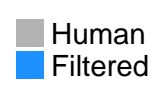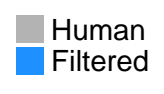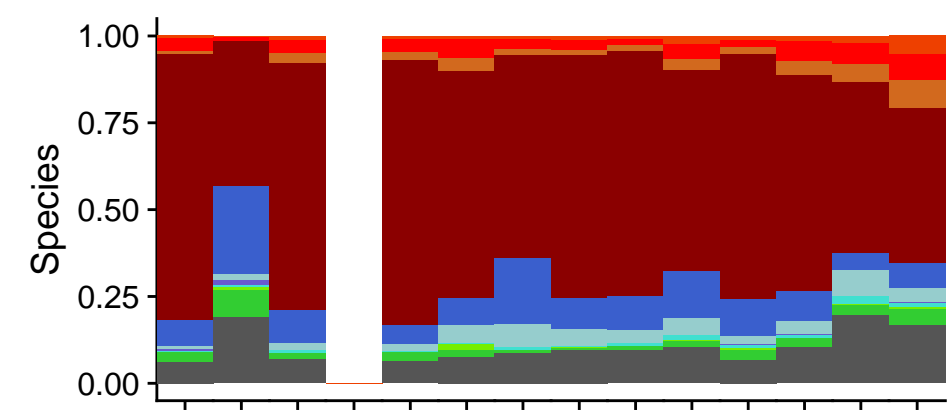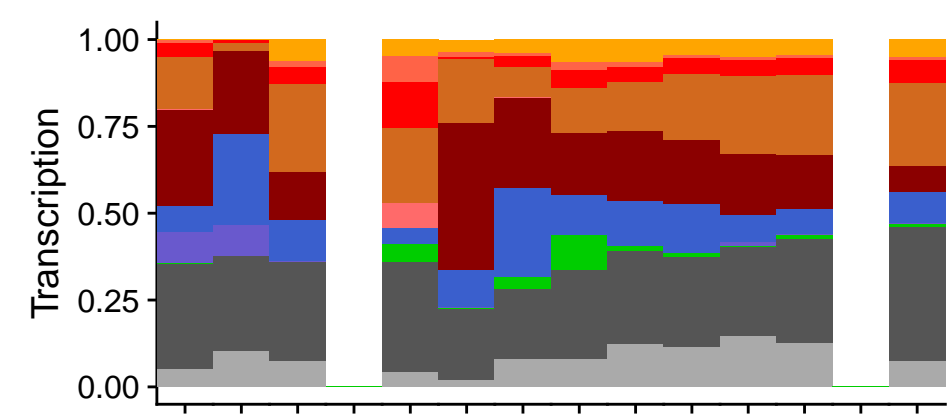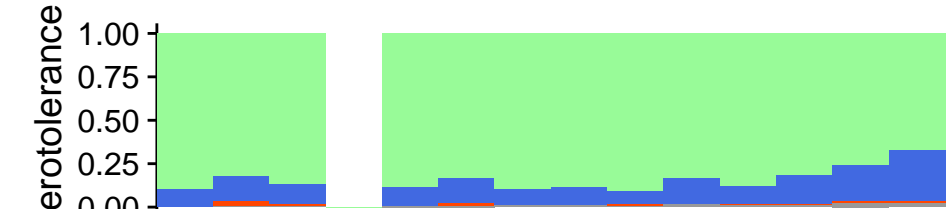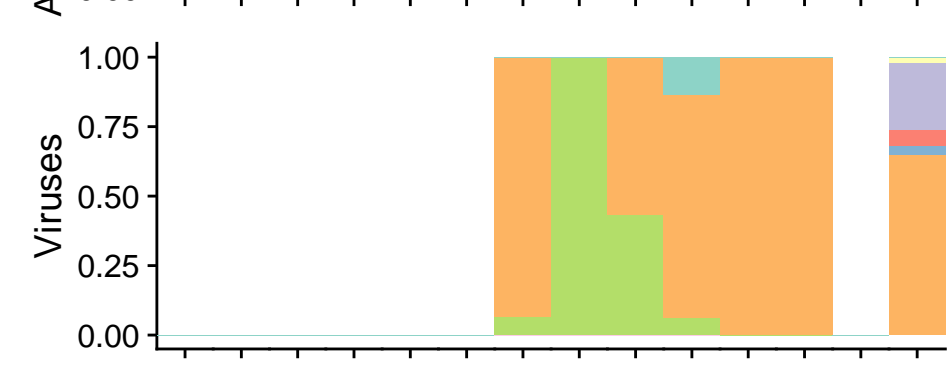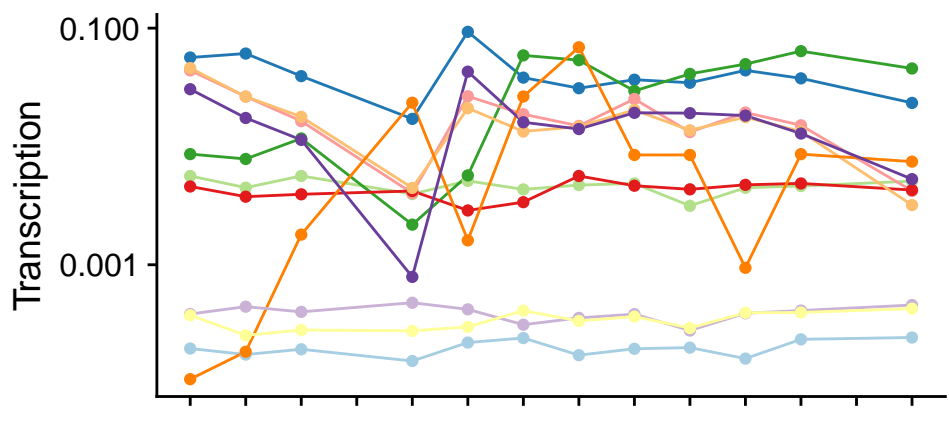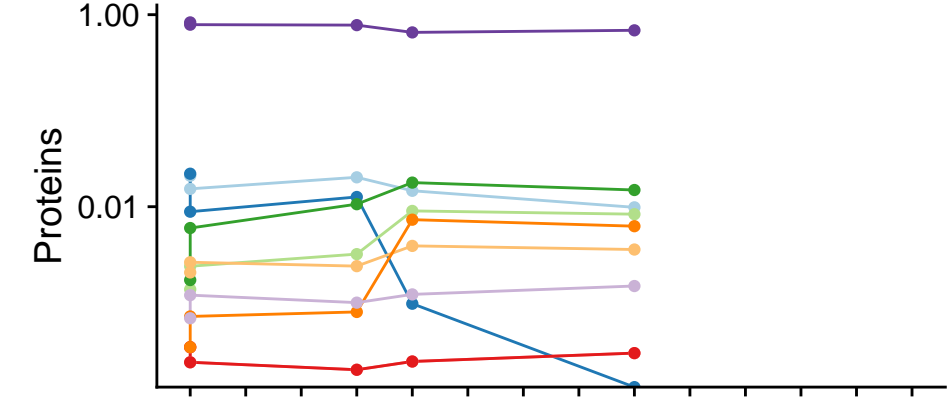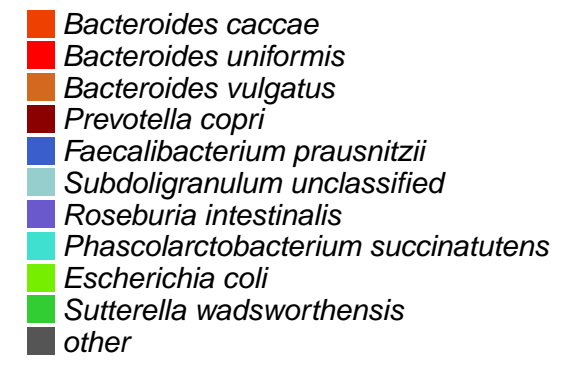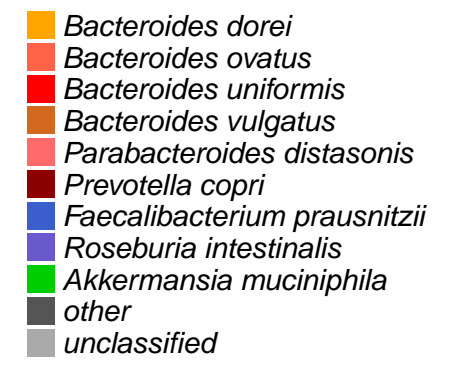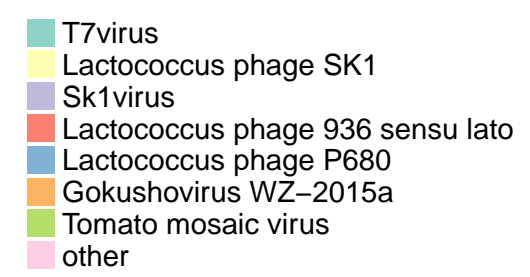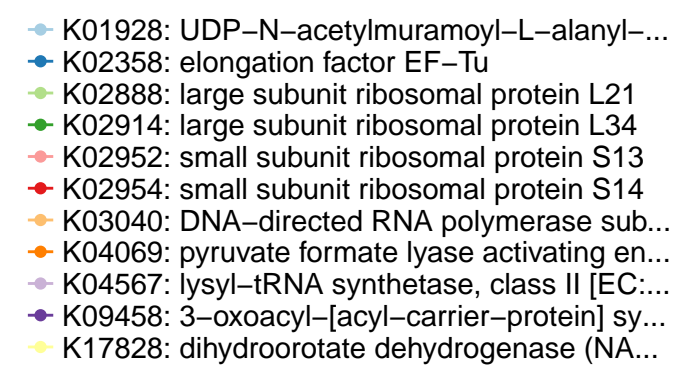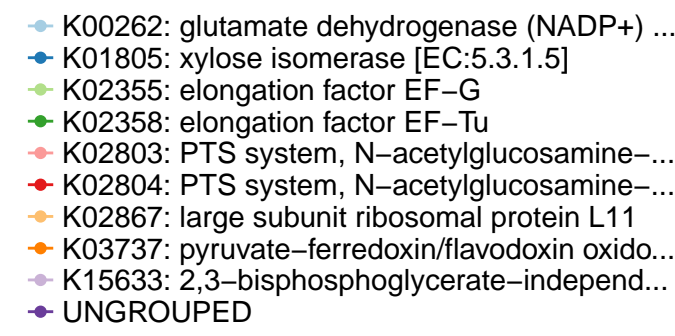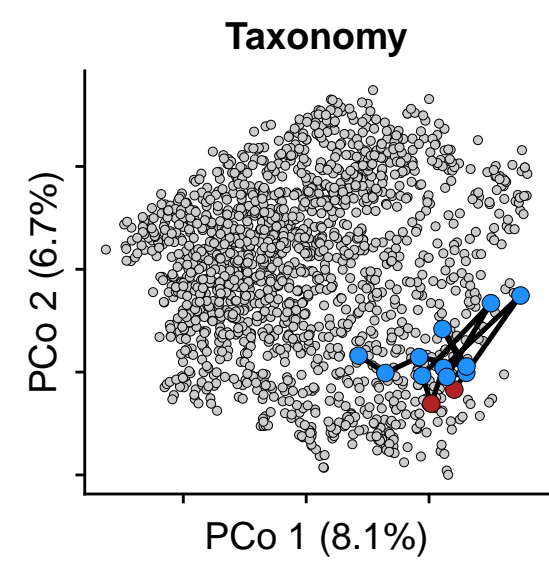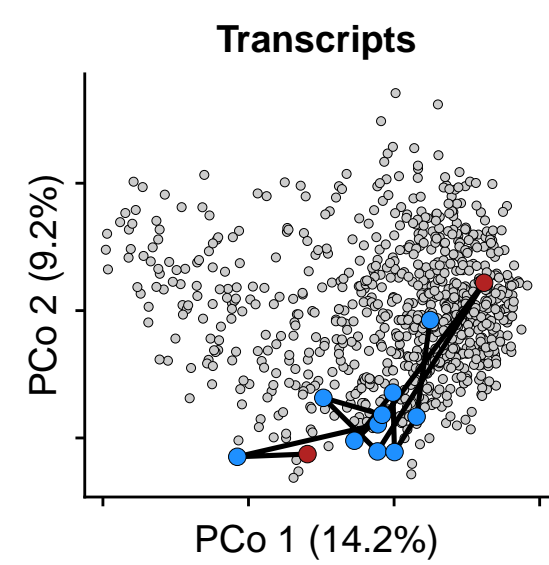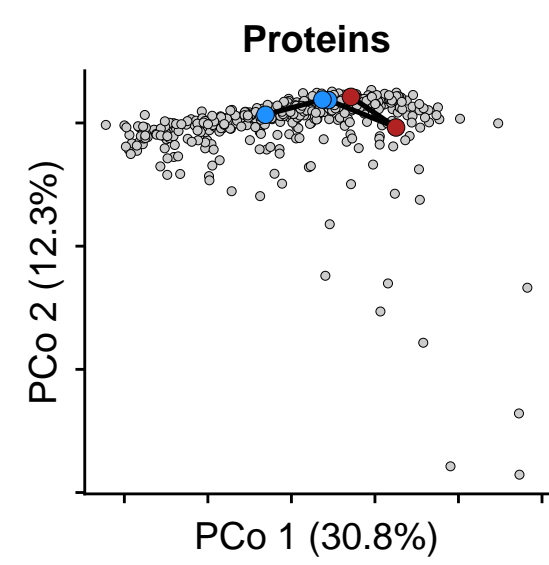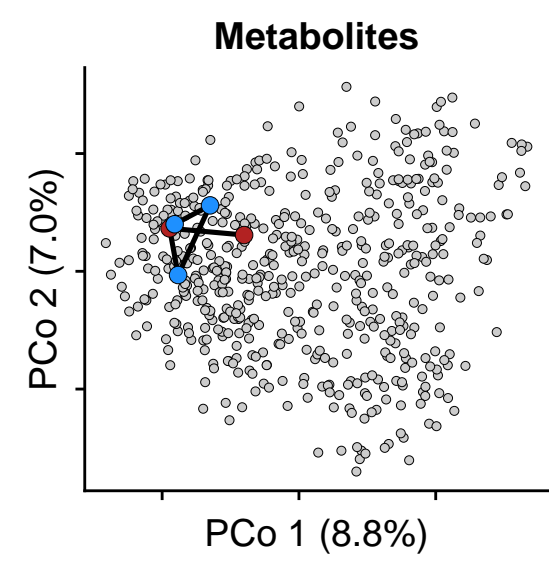

M2028: 24 Female White MGH | CD L1

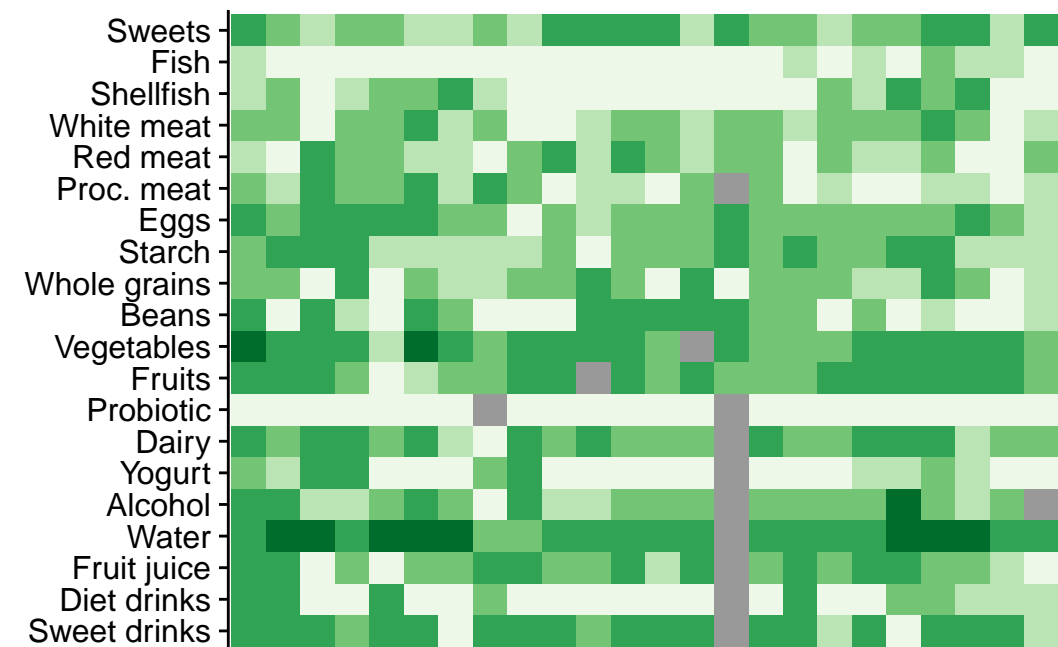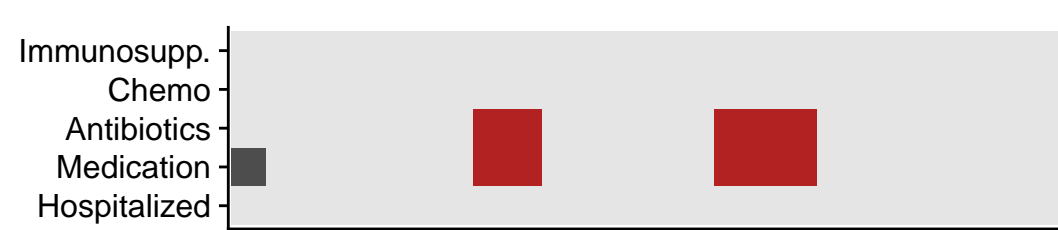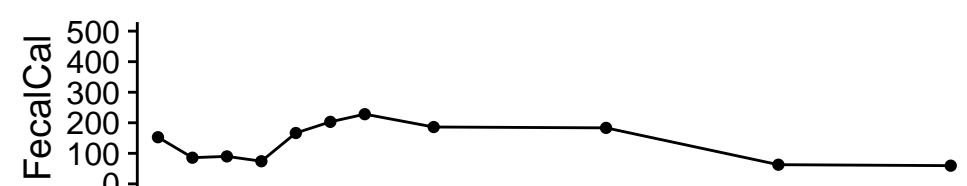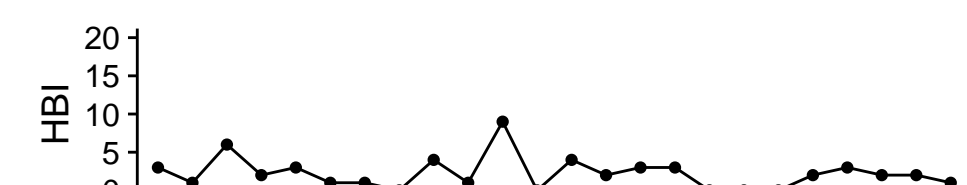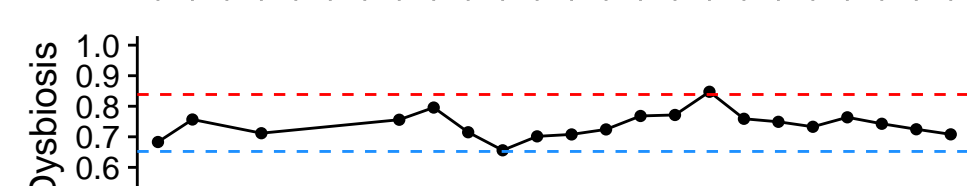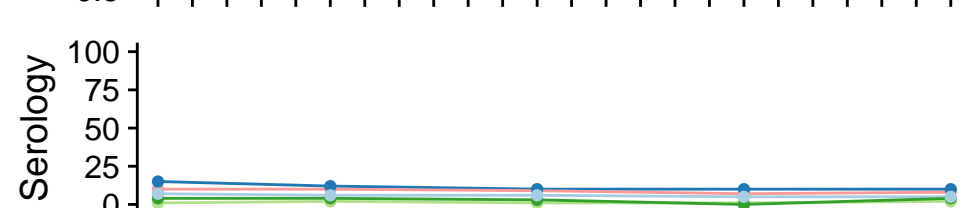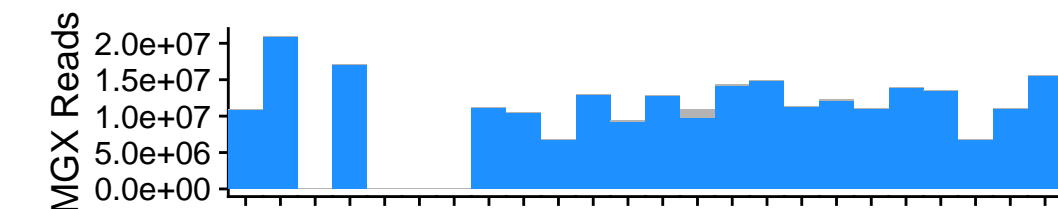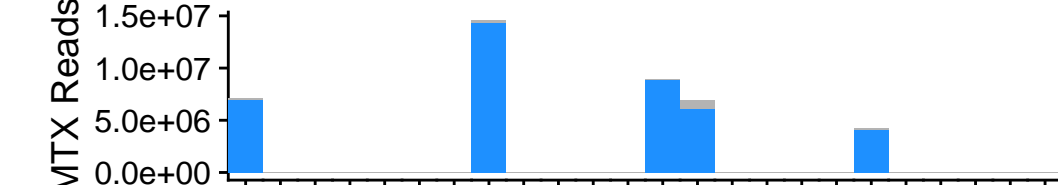

Blank  
None 7+ days  
Within 4-7 days  
Within 2-3 days  
Yesterday 1-2x  
Yesterday 3x+

Yes  
No  
Blank

Dysbiosis  
Eubiosis

ANCA EU  
Cbir1 EU  
IgA ASCA EU  
IgG ASCA EU  
OmpC. EU

Human  
Filtered

Human  
Filtered

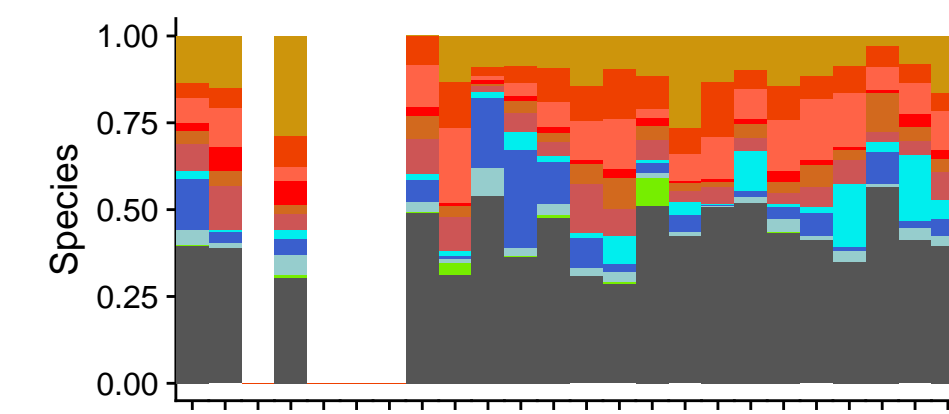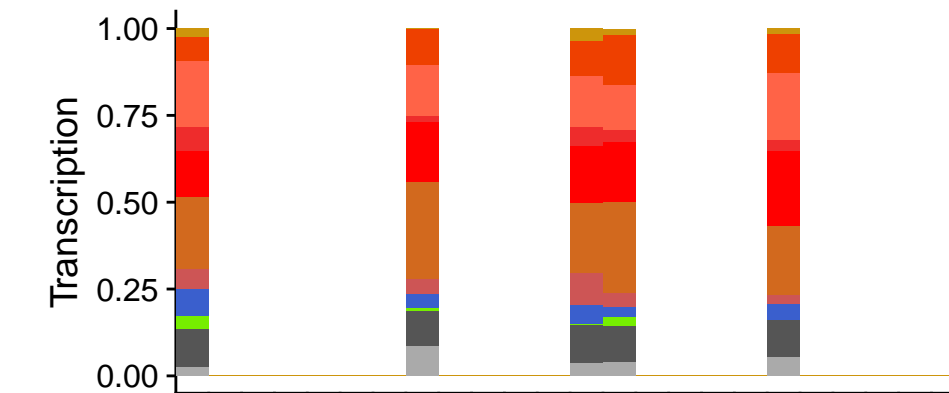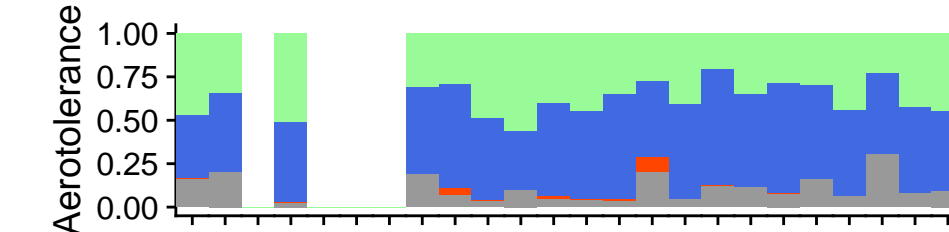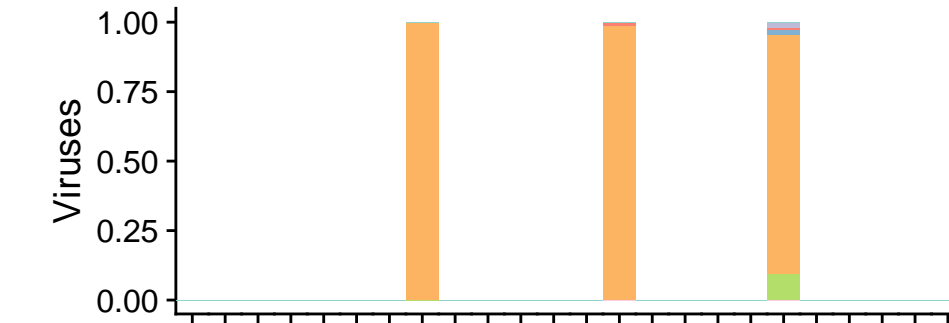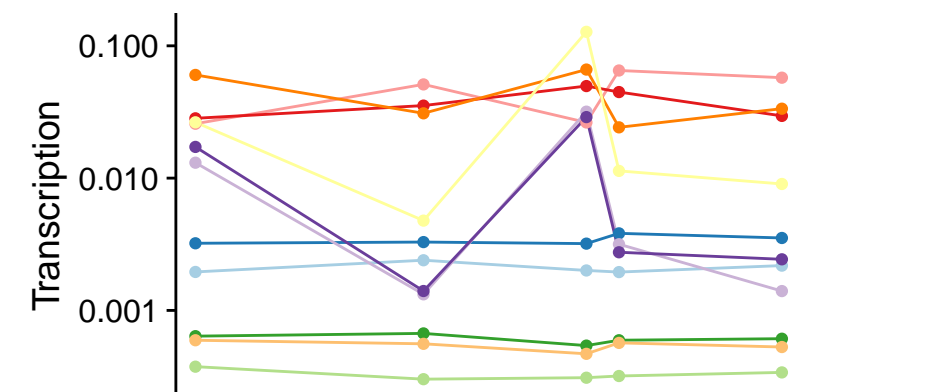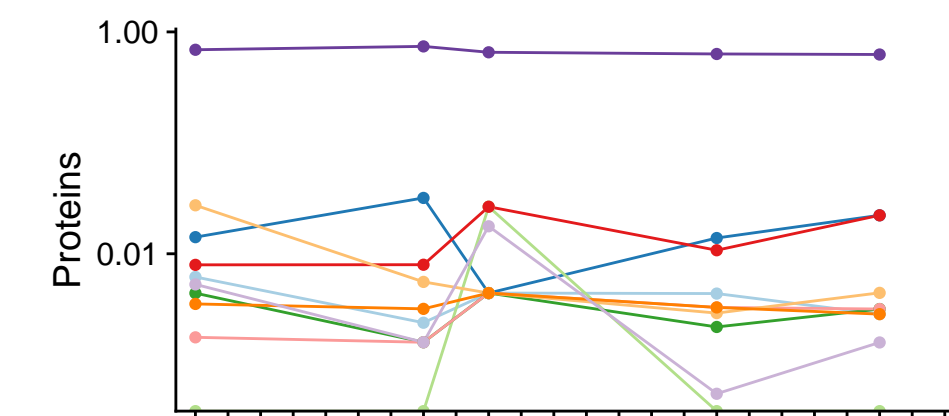

*Alistipes putredinis*  
*Bacteroides caccae*  
*Bacteroides ovatus*  
*Bacteroides uniformis*  
*Bacteroides vulgatus*  
*Parabacteroides merdae*  
*Eubacterium rectale*  
*Faecalibacterium prausnitzii*  
*Subdoligranulum unclassified*  
*Escherichia coli*  
other

*Alistipes putredinis*  
*Bacteroides caccae*  
*Bacteroides ovatus*  
*Bacteroides thetaiotaomicron*  
*Bacteroides uniformis*  
*Bacteroides vulgatus*  
*Parabacteroides merdae*  
*Faecalibacterium prausnitzii*  
*Escherichia coli*  
other  
unclassified

obligate anaerobe  
aerotolerant  
facultative anaerobe  
unknown

T7virus  
Pseudomonas phage PPpW-4  
Sk1virus  
Lactococcus phage 936 sensu lato  
Lactococcus phage P680  
Gokushovirus WZ-2015a  
Pepper mild mottle virus  
other

K00616: transaldolase [EC:2.2.1.2]  
K00850: 6-phosphofructokinase 1 [EC:2.7.1....]  
K01619: deoxyribose-phosphate aldolase [E...]  
K01876: aspartyl-tRNA synthetase [EC:6.1.1...]  
K02078: acyl carrier protein  
K02968: small subunit ribosomal protein S20  
K03075: preprotein translocase subunit SecG  
K03088: RNA polymerase sigma-70 factor, E...  
K03686: molecular chaperone DnaJ  
K04077: chaperonin GroEL  
K04078: chaperonin GroES

K00134: glyceraldehyde 3-phosphate dehydr...  
K00262: glutamate dehydrogenase (NADP+) ...  
K01744: aspartate ammonia-lyase [EC:4.3.1...]  
K02982: small subunit ribosomal protein S3  
K02986: small subunit ribosomal protein S4  
K04077: chaperonin GroEL  
K10117: raffinose/stachyose/melibiose transp...  
K10200: N-acetylglucosamine transport syst...  
K10439: ribose transport system substrate-b...  
UNGROUPED

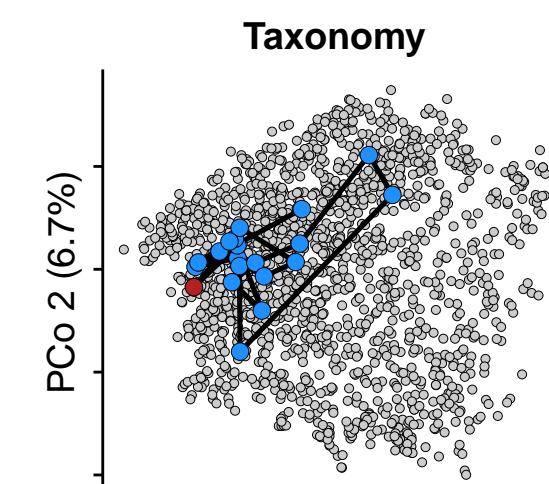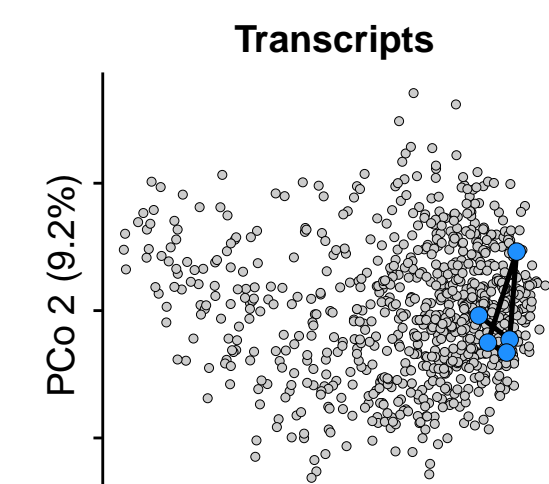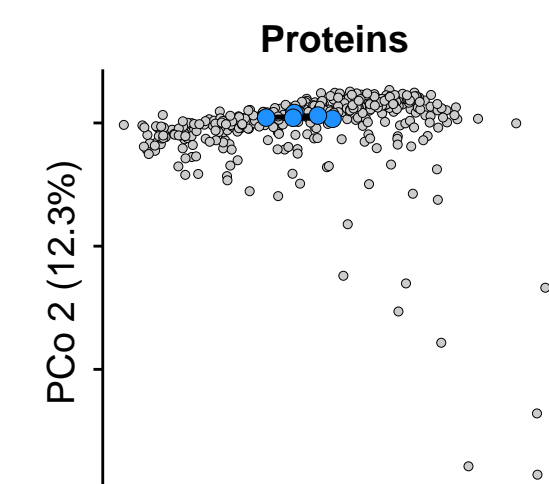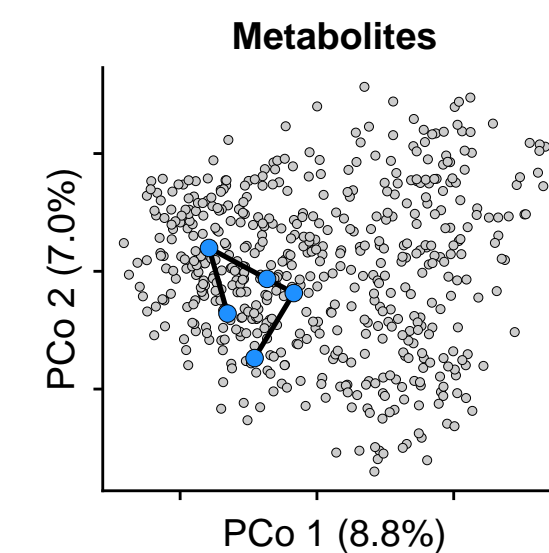

M2034: 22 Female White MGH | CD L3

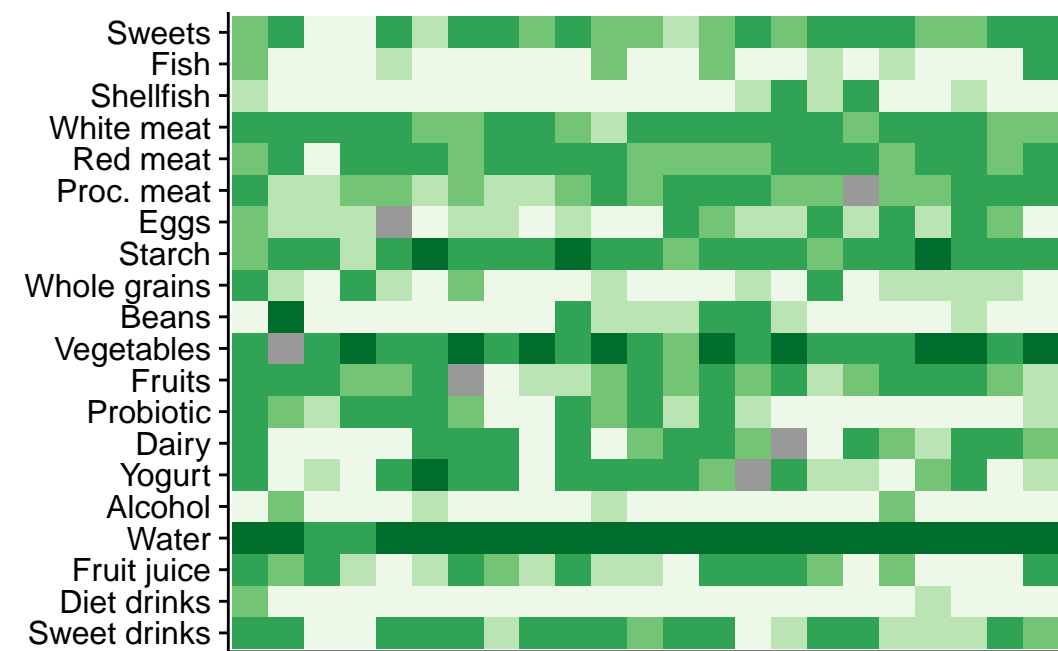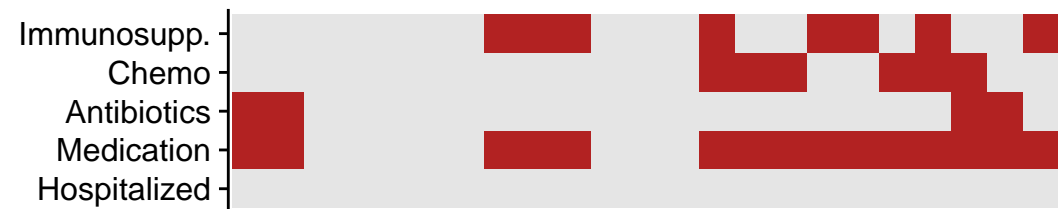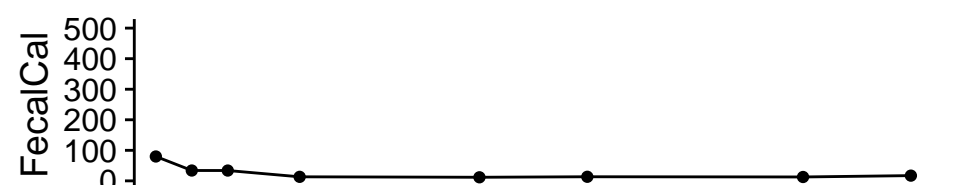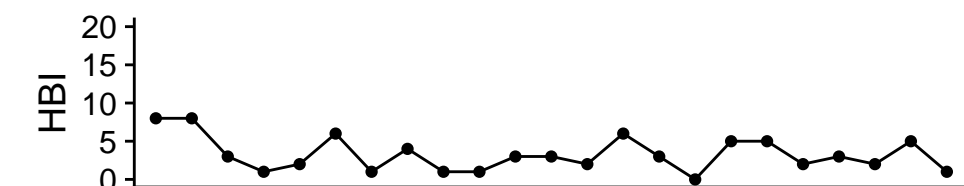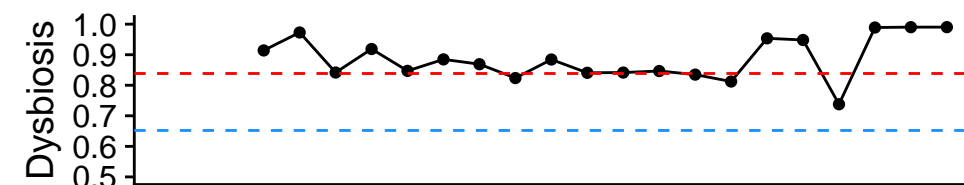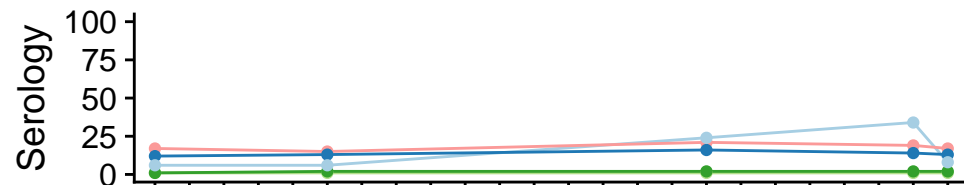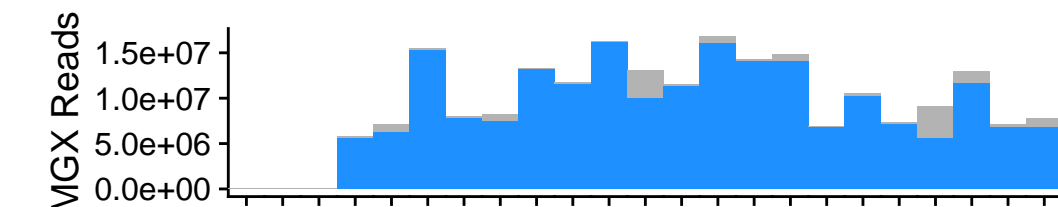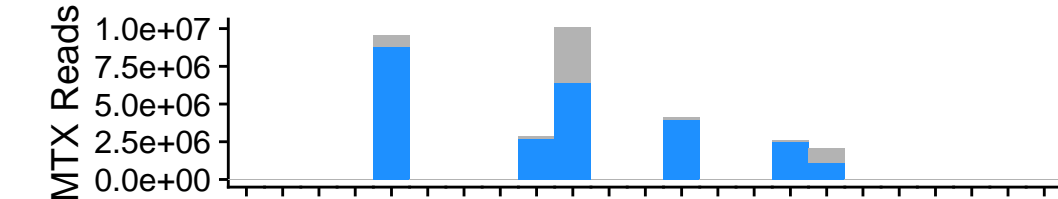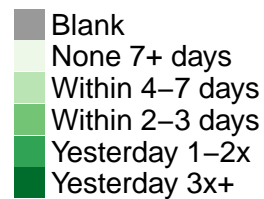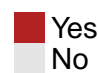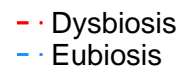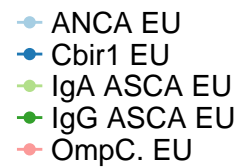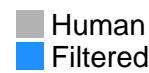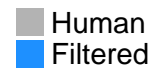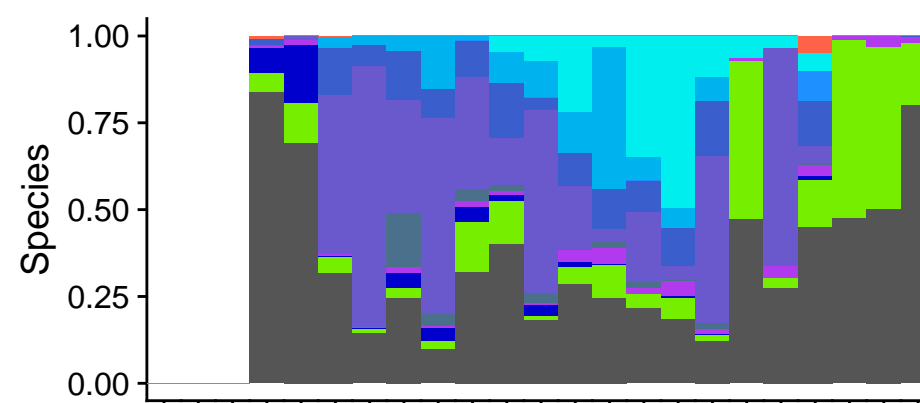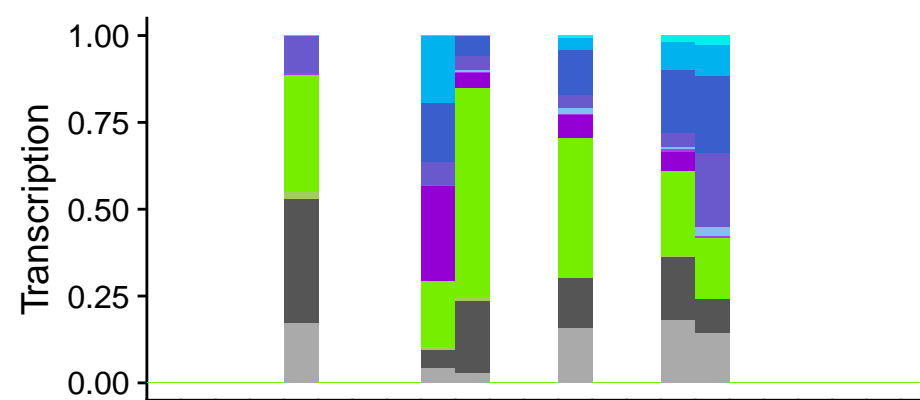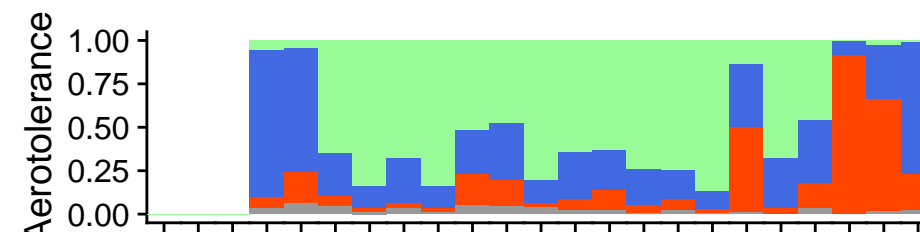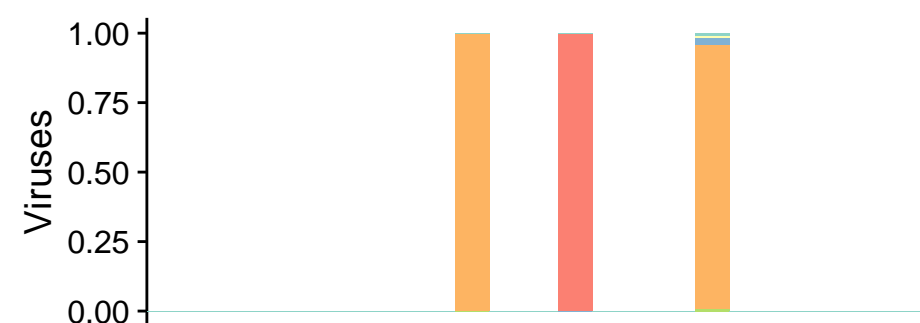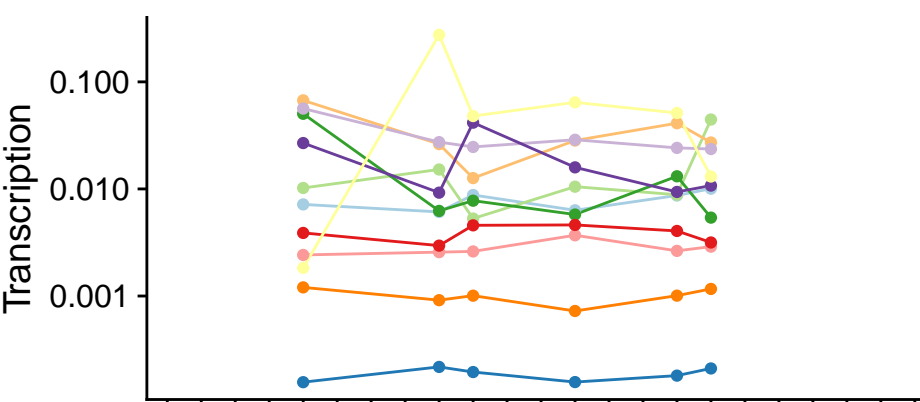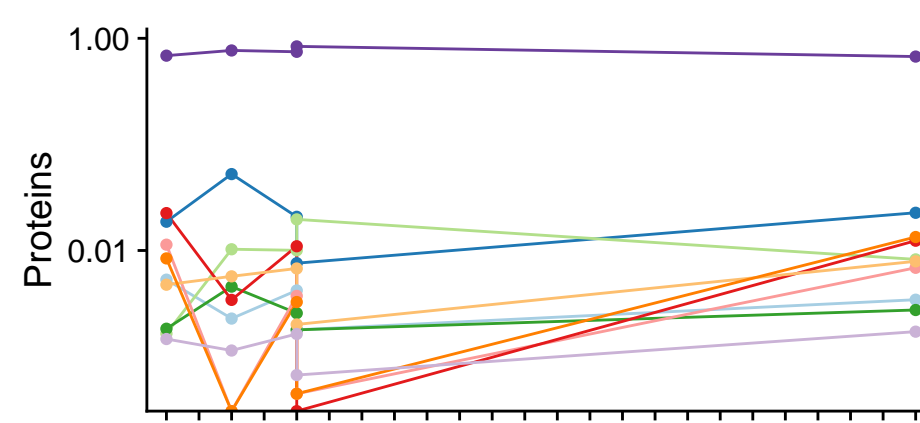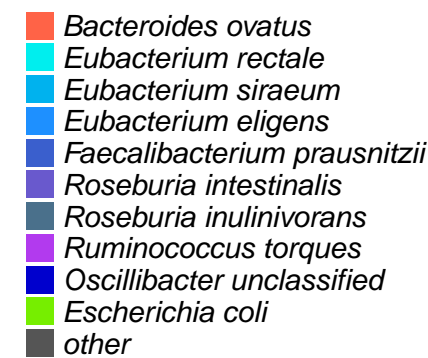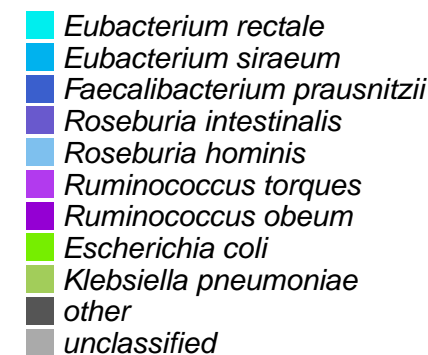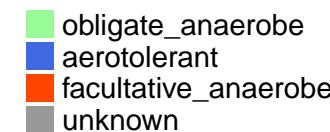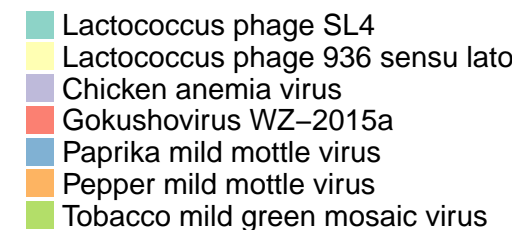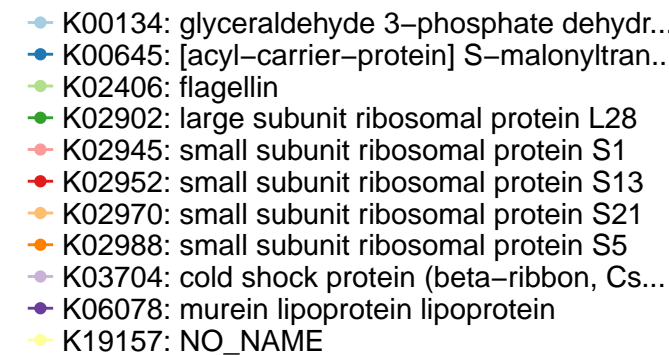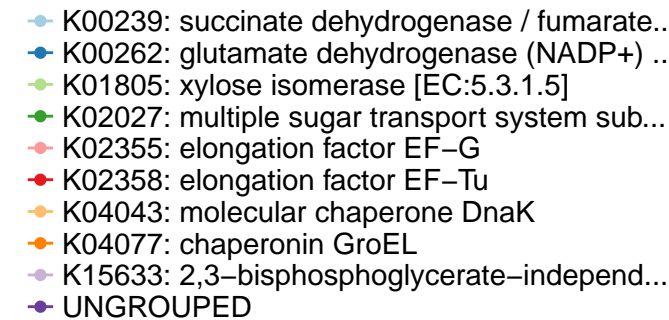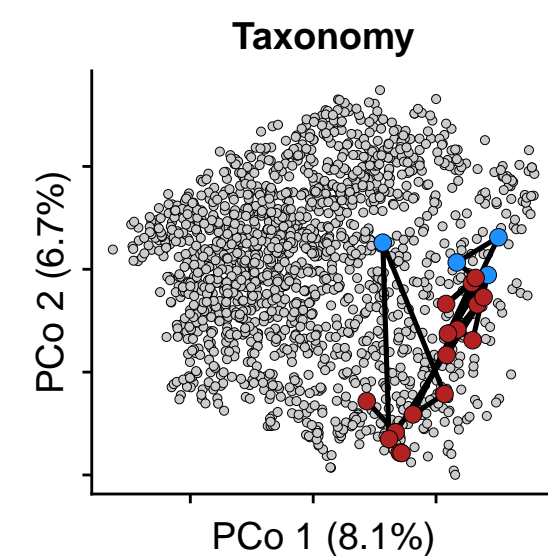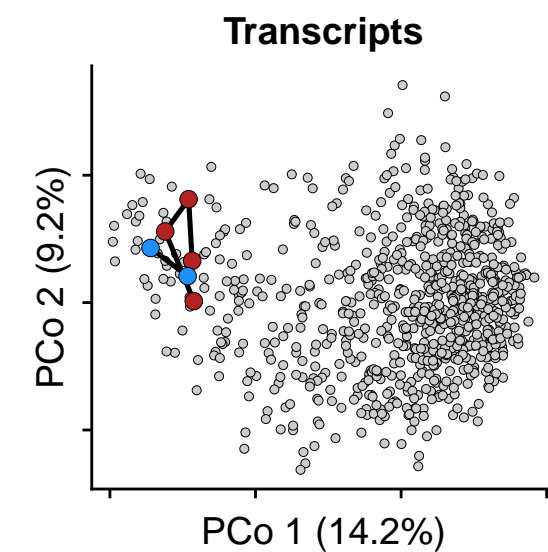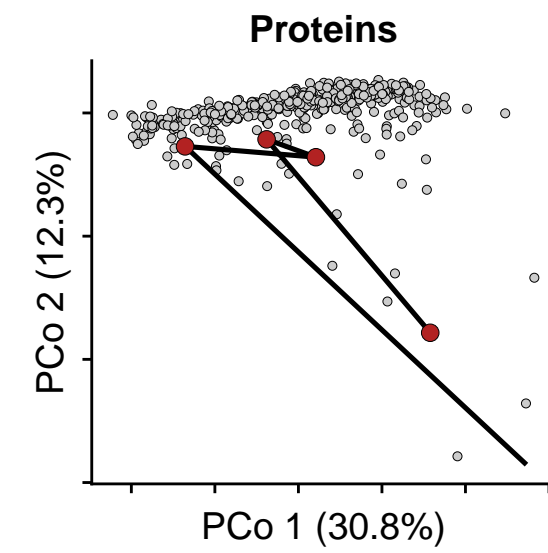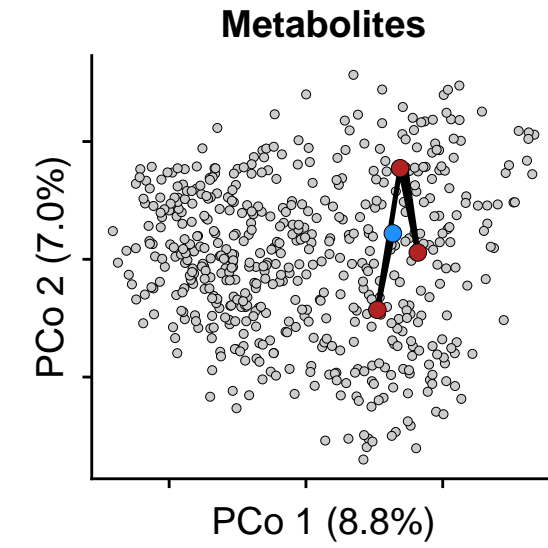

M2039: 40 Female White MGH | nonIBD

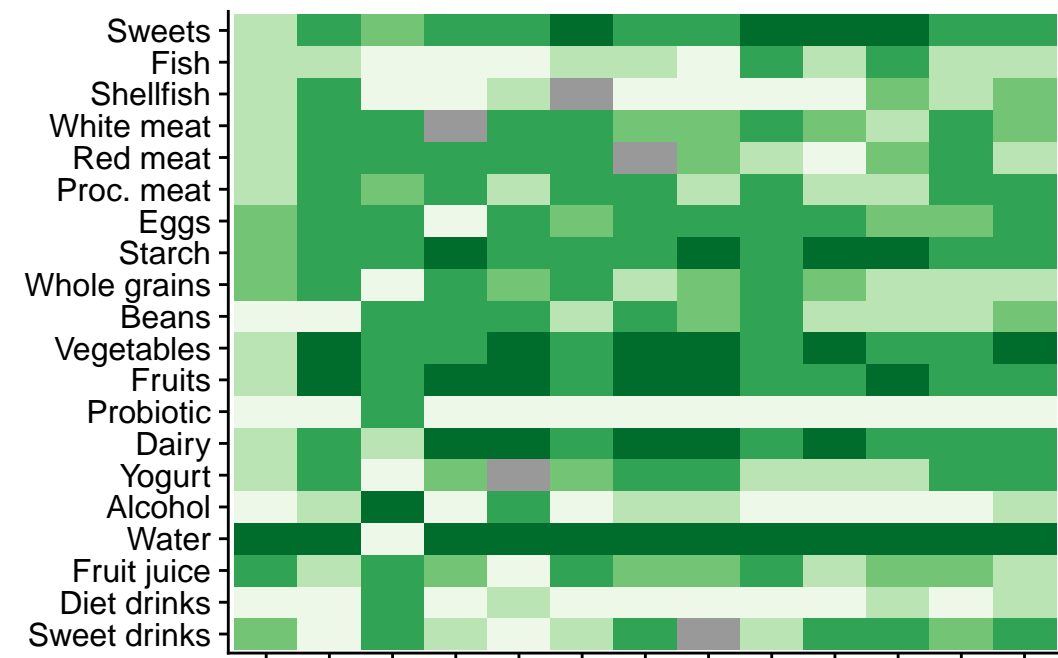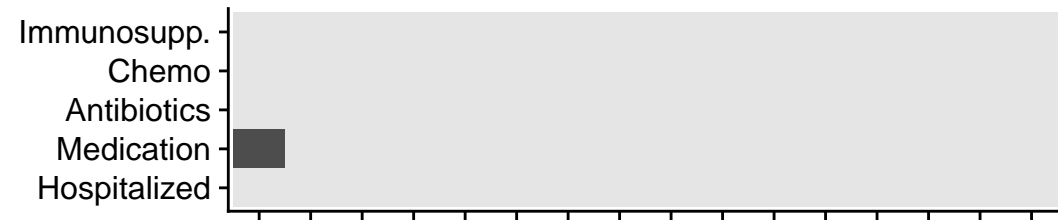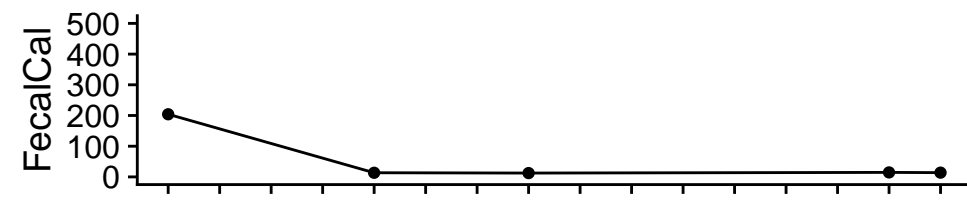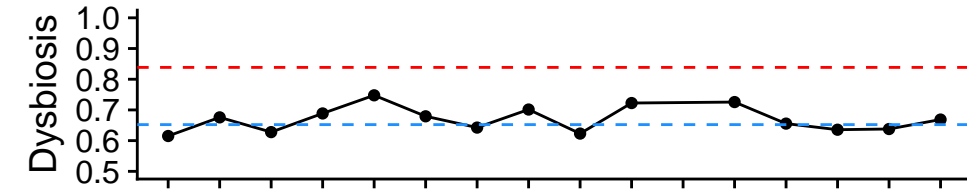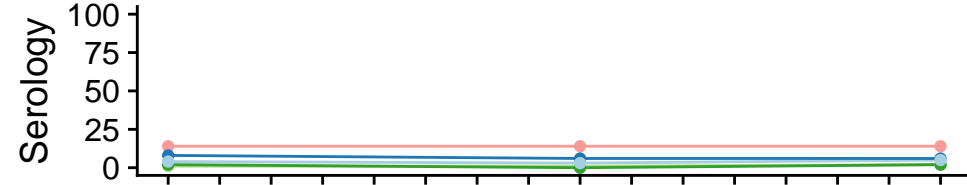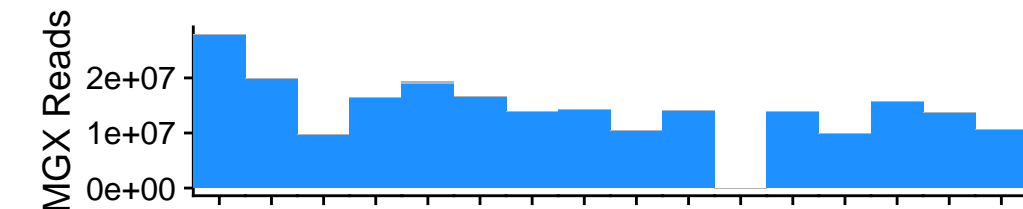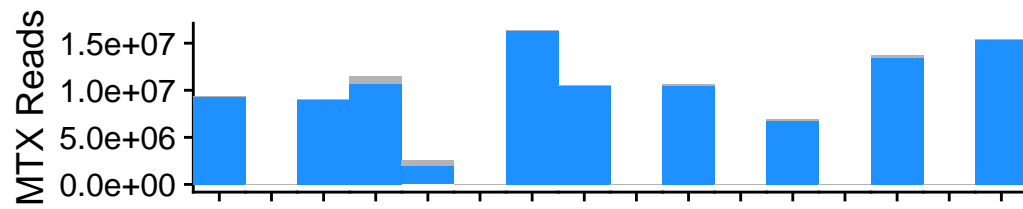

Blank  
None 7+ days  
Within 4-7 days  
Within 2-3 days  
Yesterday 1-2x  
Yesterday 3x+

No  
Blank

Dysbiosis  
Eubiosis

ANCA EU  
Cbir1 EU  
IgA ASCA EU  
IgG ASCA EU  
OmpC. EU

Human  
Filtered

Human  
Filtered

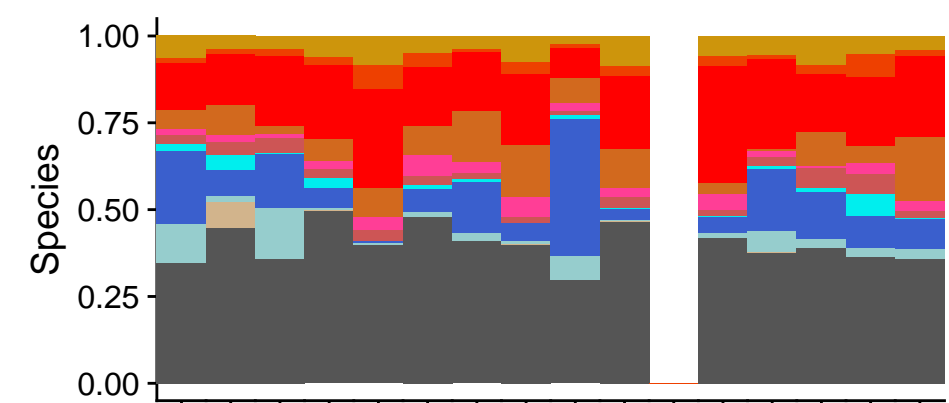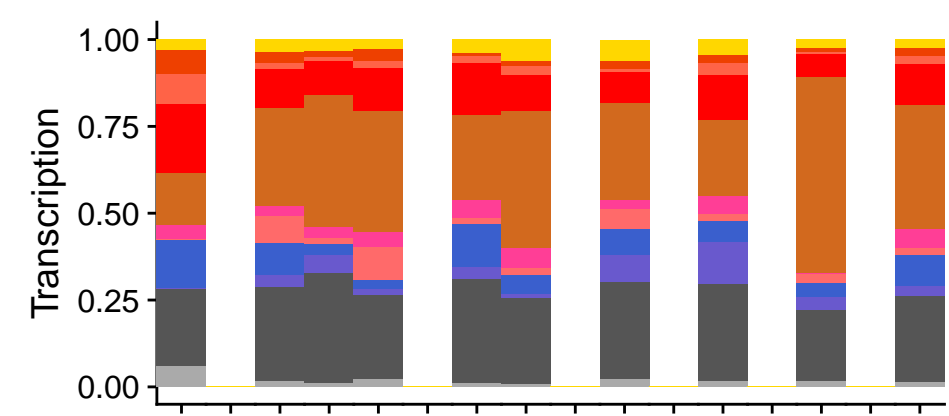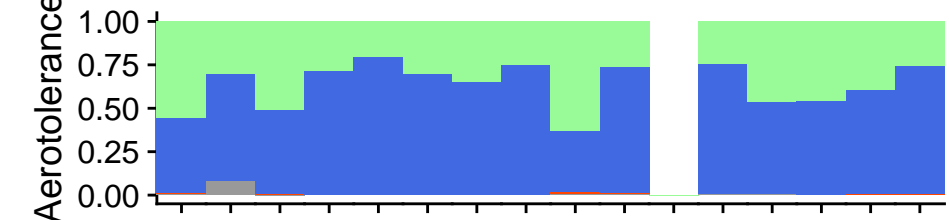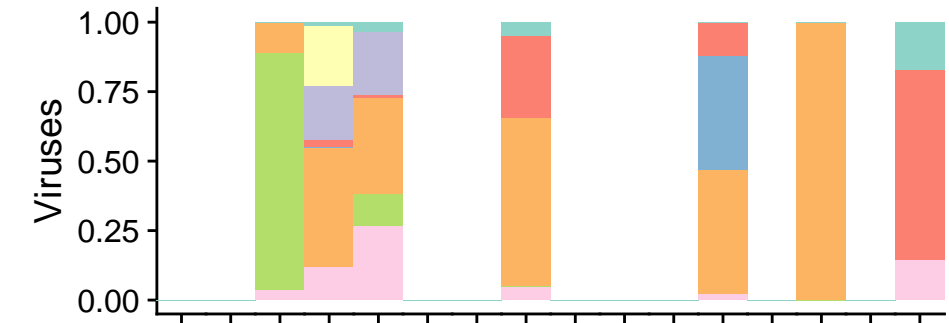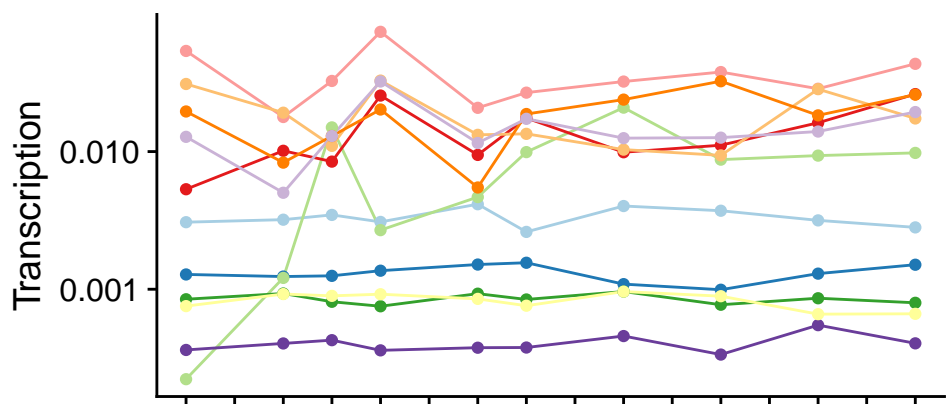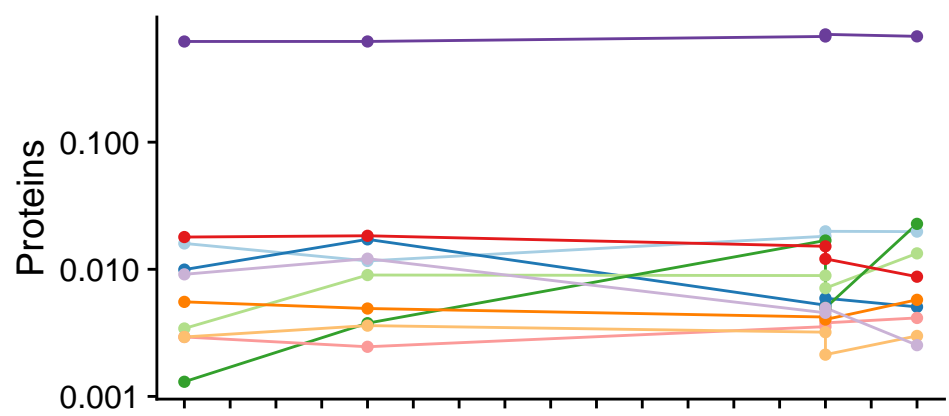

*Alistipes putredinis*  
*Bacteroides caccae*  
*Bacteroides uniformis*  
*Bacteroides vulgatus*  
*Bacteroides xylanisolvens*  
*Parabacteroides merdae*  
*Eubacterium rectale*  
*Faecalibacterium prausnitzii*  
*Subdoligranulum unclassified*  
*C2likevirus unclassified*  
other

*Alistipes onderdonkii*  
*Bacteroides caccae*  
*Bacteroides ovatus*  
*Bacteroides uniformis*  
*Bacteroides vulgatus*  
*Bacteroides xylanisolvens*  
*Parabacteroides distasonis*  
*Faecalibacterium prausnitzii*  
*Roseburia intestinalis*  
other  
unclassified

obligate\_anaerobe  
aerotolerant  
facultative\_anaerobe  
unknown

*Pseudomonas phage PPpW-4*  
*Lactococcus phage P008*  
*Lactococcus phage 936 sensu lato*  
*Gokushovirus WZ-2015a*  
*Cucumber leaf spot virus*  
*Pepper mild mottle virus*  
*Tomato mosaic virus*  
other

K00134: glyceraldehyde 3-phosphate dehydr...  
K01810: glucose-6-phosphate isomerase [E...  
K01834: 2,3-bisphosphoglycerate-depende...  
K01876: aspartyl-tRNA synthetase [EC:6.1.1...  
K02078: acyl carrier protein  
K02956: small subunit ribosomal protein S15  
K02968: small subunit ribosomal protein S20  
K03088: RNA polymerase sigma-70 factor, E...  
K03530: DNA-binding protein HU-beta  
K06168: bifunctional enzyme involved in thiol...  
K07568: S-adenosylmethionine:tRNA ribosyl...

K00262: glutamate dehydrogenase (NADP+) ...  
K01006: pyruvate, orthophosphate dikinase [...  
K01610: phosphoenolpyruvate carboxykinase...  
K01805: xylose isomerase [EC:5.3.1.5]  
K02027: multiple sugar transport system sub...  
K02358: elongation factor EF-Tu  
K02931: large subunit ribosomal protein L5  
K03046: DNA-directed RNA polymerase sub...  
K03737: pyruvate-ferredoxin/flavodoxin oxido...  
UNGROUPED

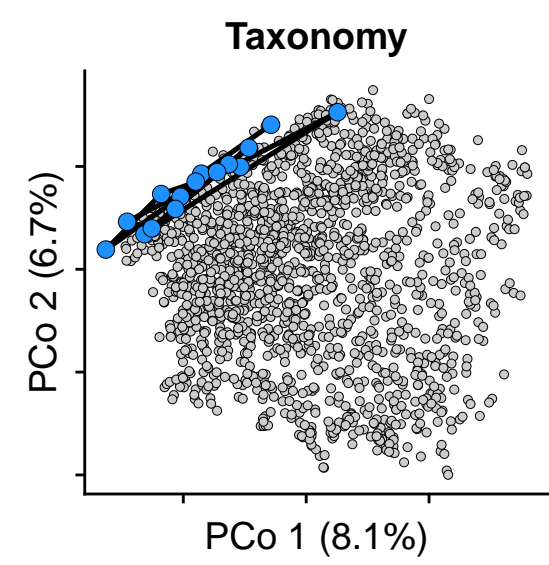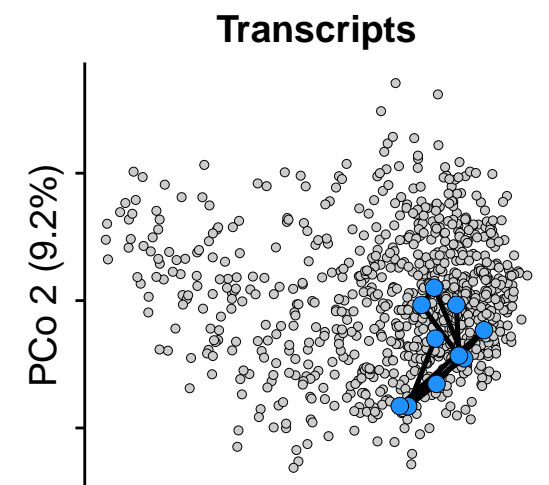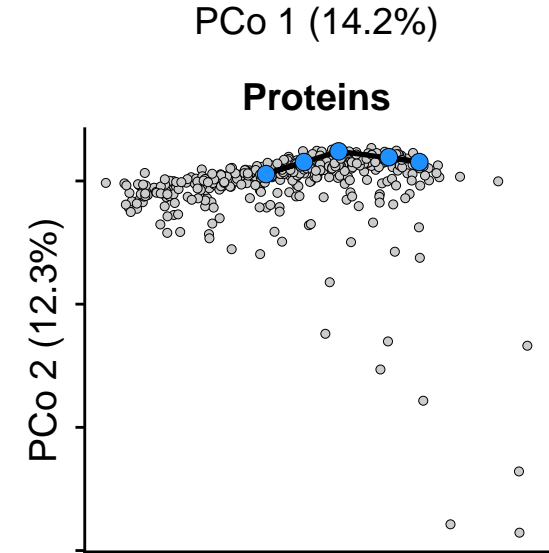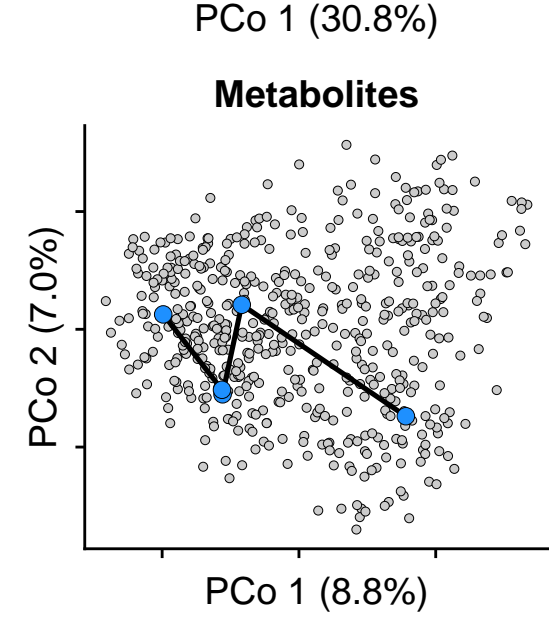

M2041: 55 Male White MGH | nonIBD

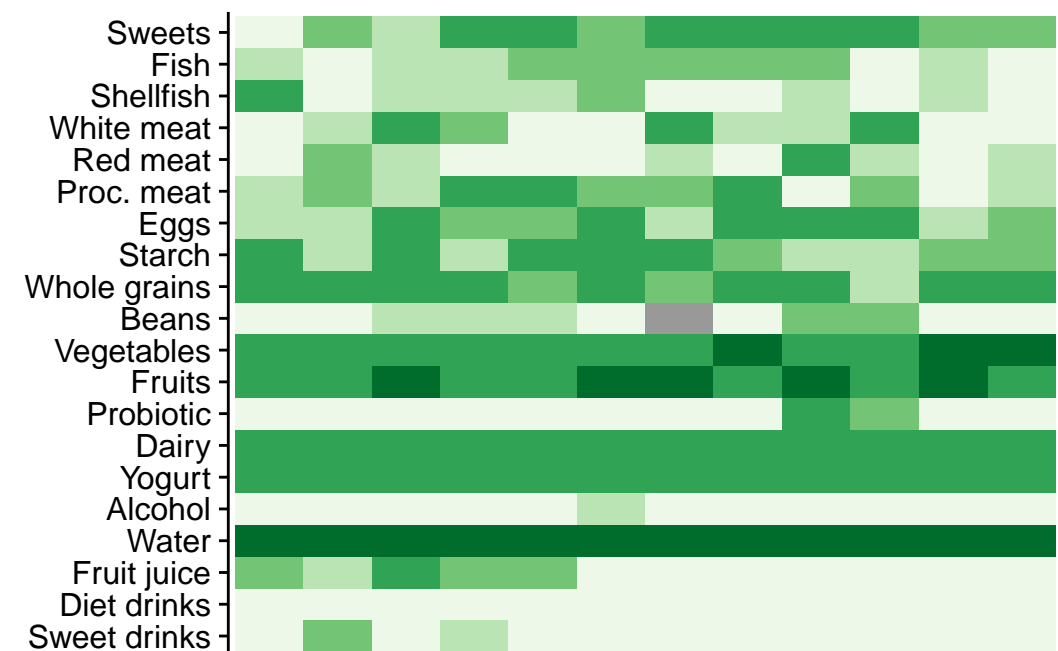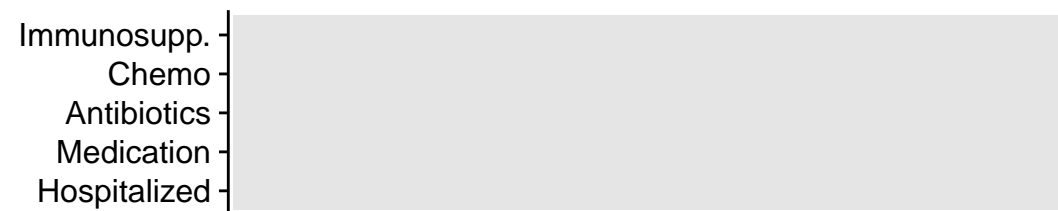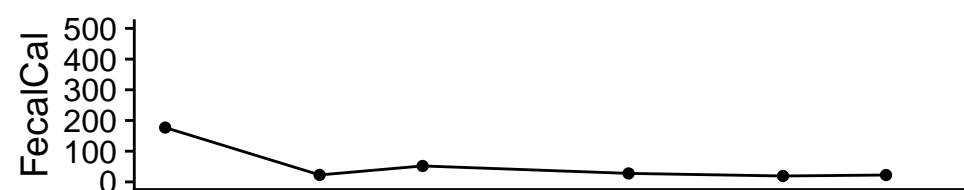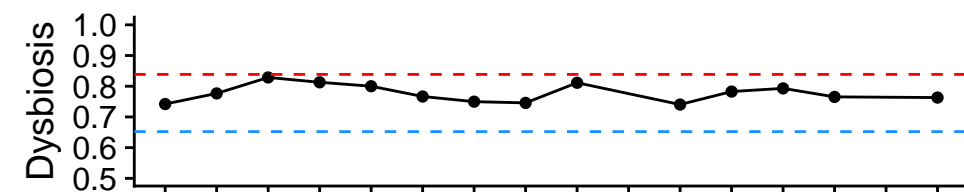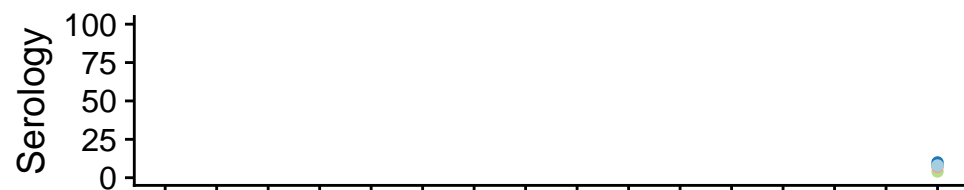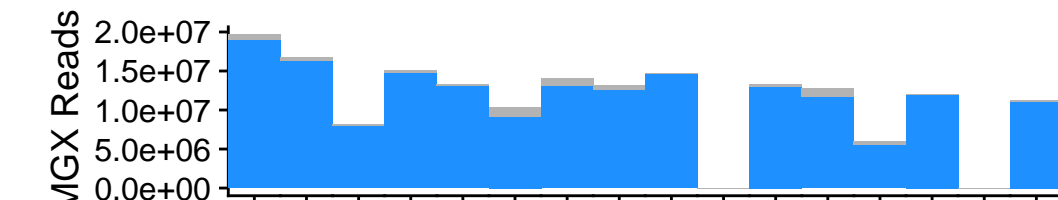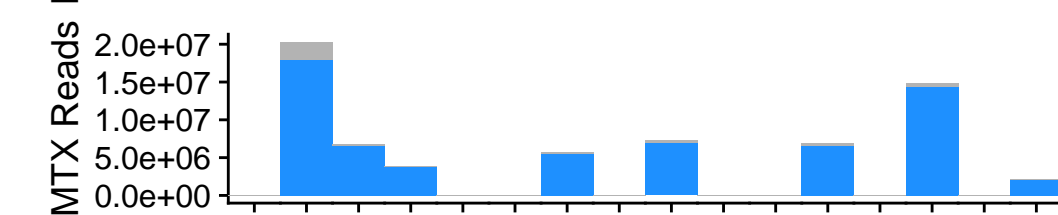

Blank  
None 7+ days  
Within 4-7 days  
Within 2-3 days  
Yesterday 1-2x  
Yesterday 3x+

No

Dysbiosis  
Eubiosis

ANCA EU  
Cbir1 EU  
IgA ASCA EU  
IgG ASCA EU  
OmpC. EU

Human  
Filtered

Human  
Filtered

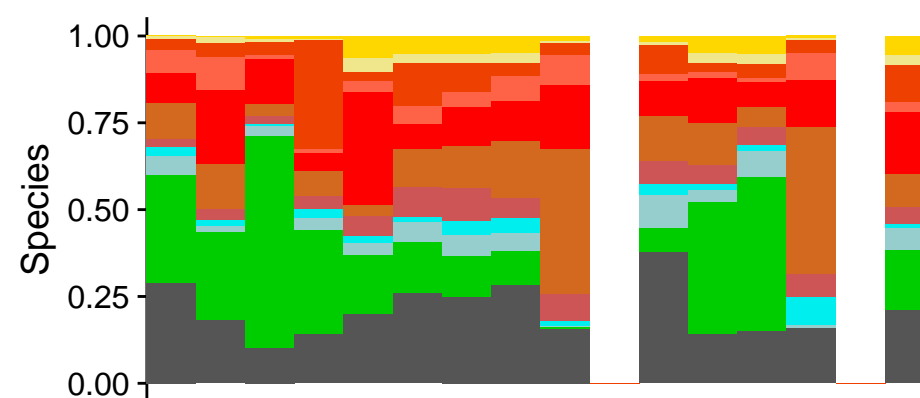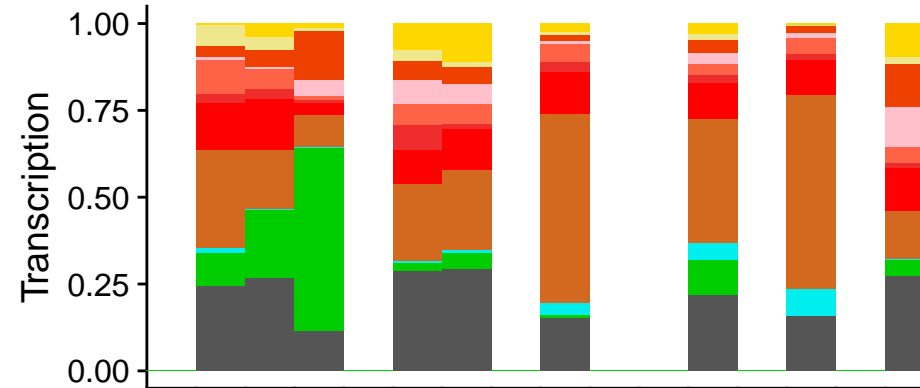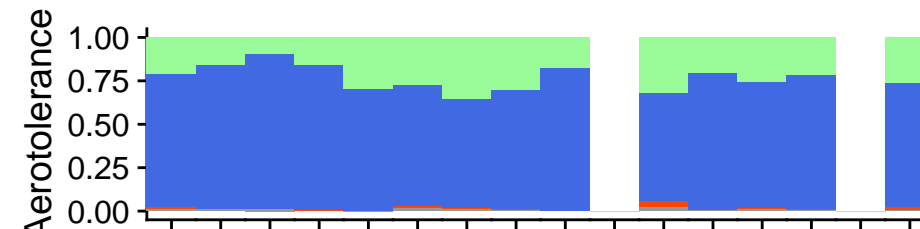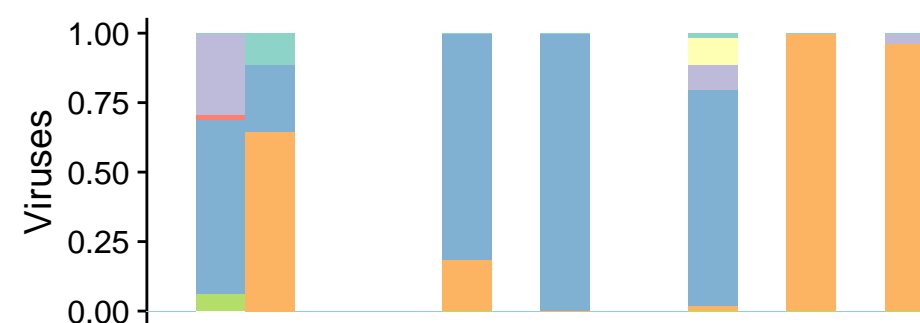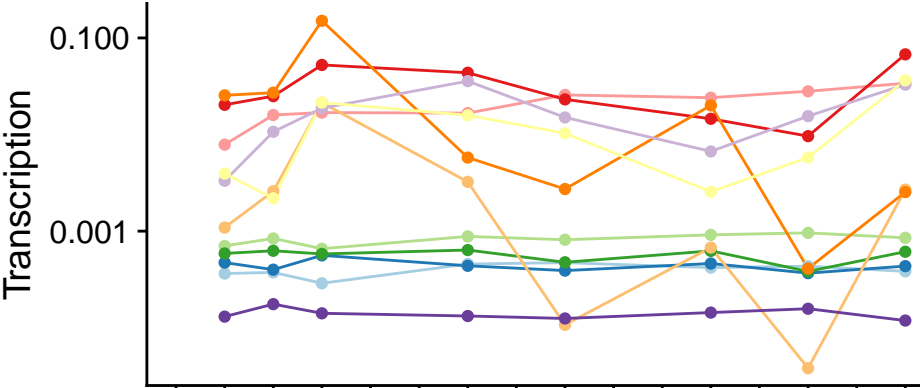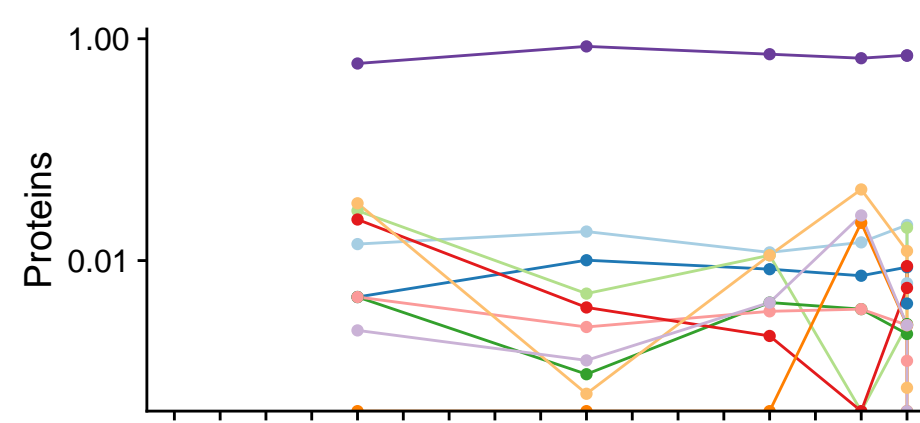

*Alistipes onderdonkii*  
*Alistipes finegoldii*  
*Bacteroides caccae*  
*Bacteroides ovatus*  
*Bacteroides uniformis*  
*Bacteroides vulgatus*  
*Parabacteroides merdae*  
*Eubacterium rectale*  
*Subdoligranulum unclassified*  
*Akkermansia muciniphila*  
other

*Alistipes onderdonkii*  
*Alistipes finegoldii*  
*Bacteroides caccae*  
*Bacteroides fragilis*  
*Bacteroides ovatus*  
*Bacteroides thetaiotaomicron*  
*Bacteroides uniformis*  
*Bacteroides vulgatus*  
*Eubacterium rectale*  
*Akkermansia muciniphila*  
other

obligate\_anaerobe  
aerotolerant  
facultative\_anaerobe  
unknown

T7virus  
Lactococcus phage 936 sensu lato  
unclassified Siphoviridae  
Porcine circovirus 3  
Gokushovirus WZ-2015a  
Pepper mild mottle virus  
Tobamovirus

K00057: glycerol-3-phosphate dehydrogena...  
K00566: tRNA-specific 2-thiouridylase [EC:2...  
K00789: S-adenosylmethionine synthetase [...  
K01875: seryl-tRNA synthetase [EC:6.1.1.11]  
K02968: small subunit ribosomal protein S20  
K03088: RNA polymerase sigma-70 factor, E...  
K03695: ATP-dependent Clp protease ATP-...  
K04069: pyruvate formate lyase activating en...  
K04078: chaperonin GroES  
K09812: cell division transport system ATP-b...  
K13993: HSP20 family protein

K00262: glutamate dehydrogenase (NADP+) ...  
K01610: phosphoenolpyruvate carboxykinase...  
K02358: elongation factor EF-Tu  
K02867: large subunit ribosomal protein L11  
K02996: small subunit ribosomal protein S9  
K04043: molecular chaperone DnaK  
K10117: raffinose/stachyose/melibiose transp...  
K10439: ribose transport system substrate-b...  
K10540: methyl-galactoside transport syste...  
UNGROUPED

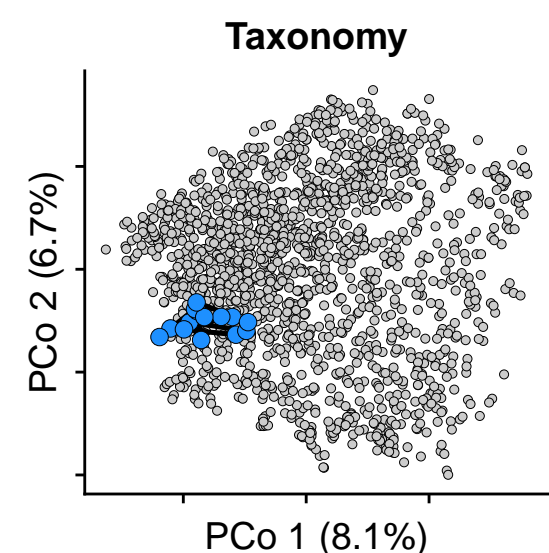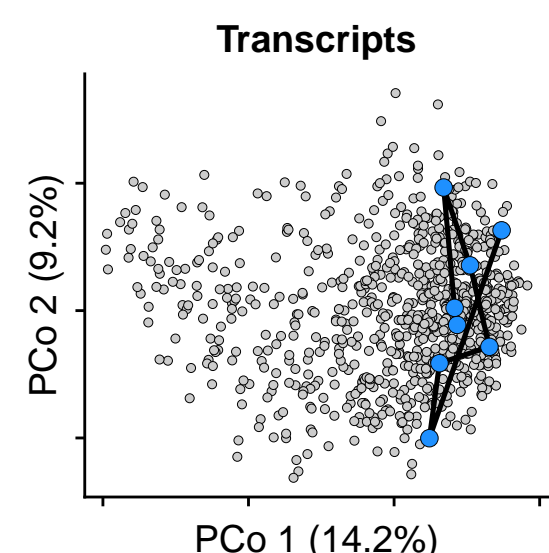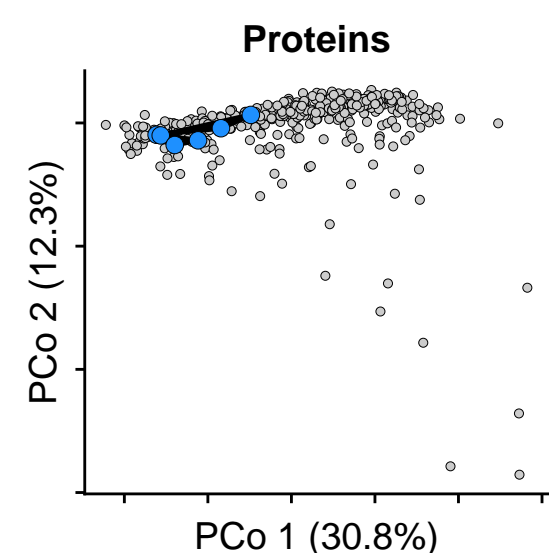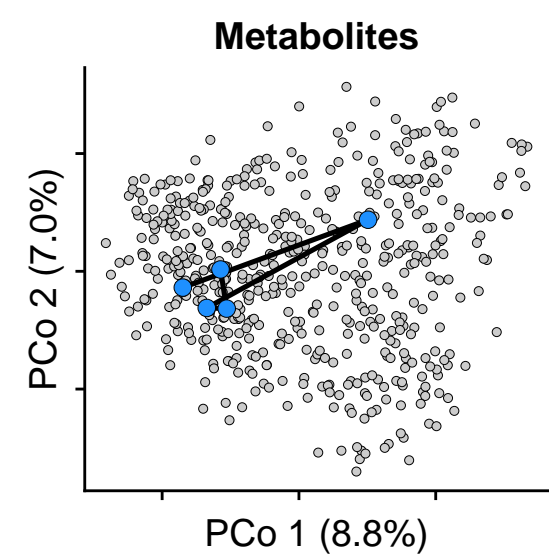

M2042: 44 Male White MGH | nonIBD

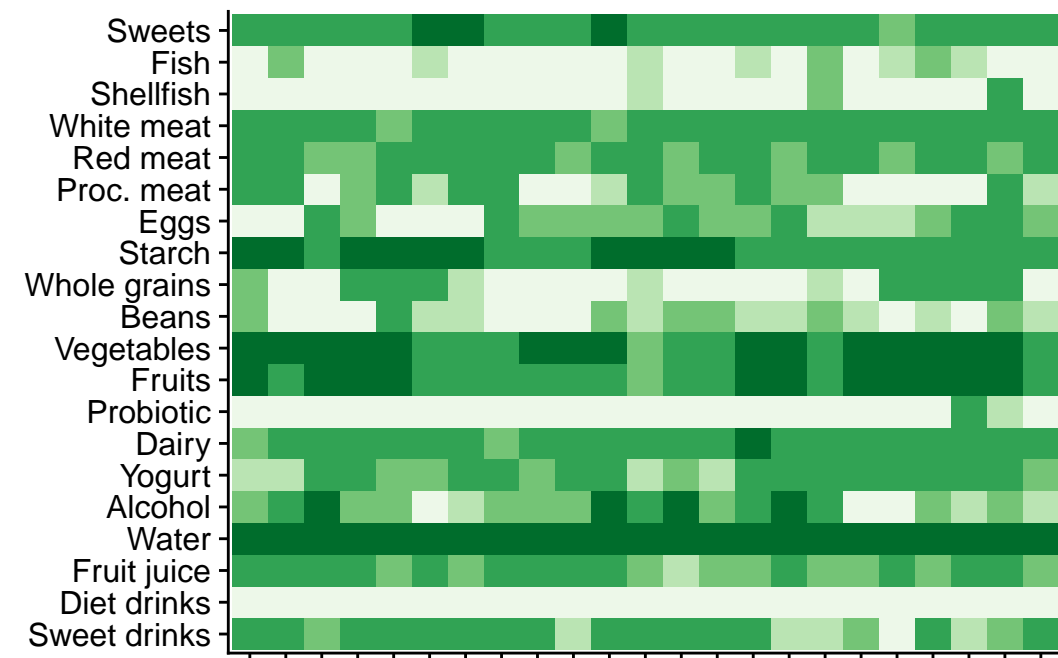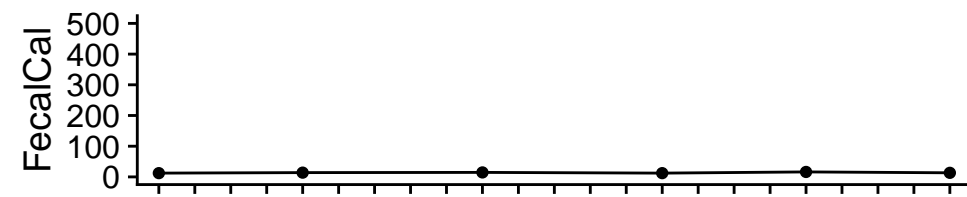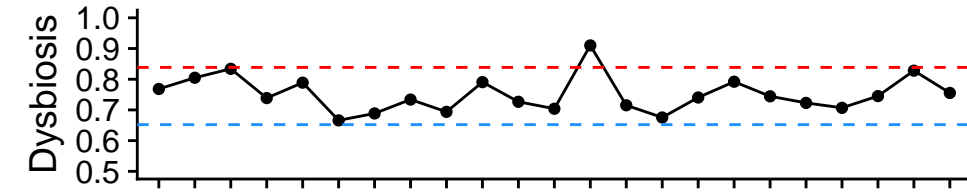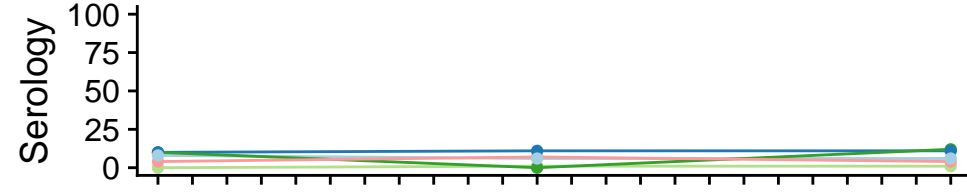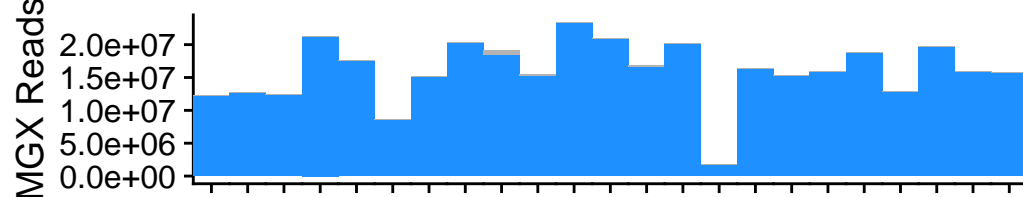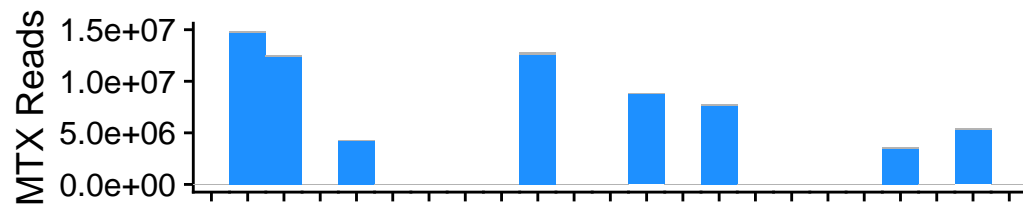

None 7+ days  
Within 4-7 days  
Within 2-3 days  
Yesterday 1-2x  
Yesterday 3x+

No

Dysbiosis  
Eubiosis

ANCA EU  
Cbir1 EU  
IgA ASCA EU  
IgG ASCA EU  
OmpC. EU

Human  
Filtered

Human  
Filtered

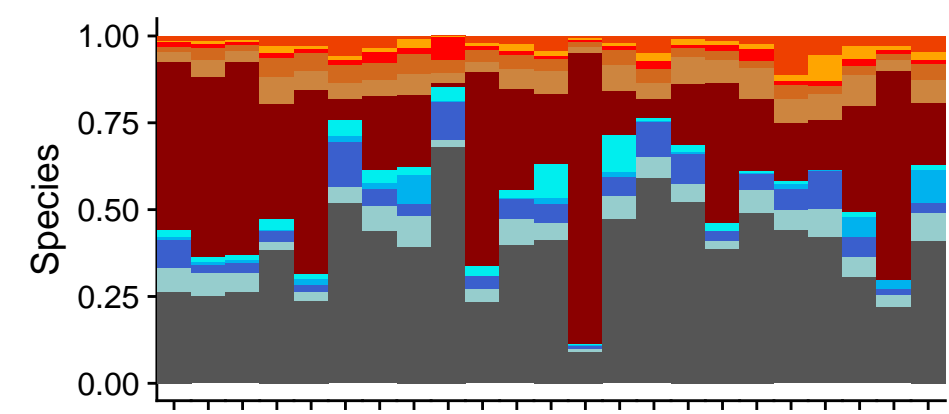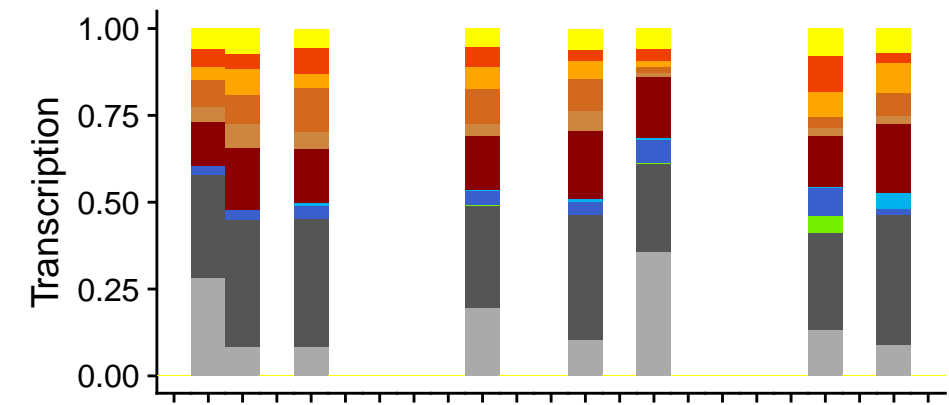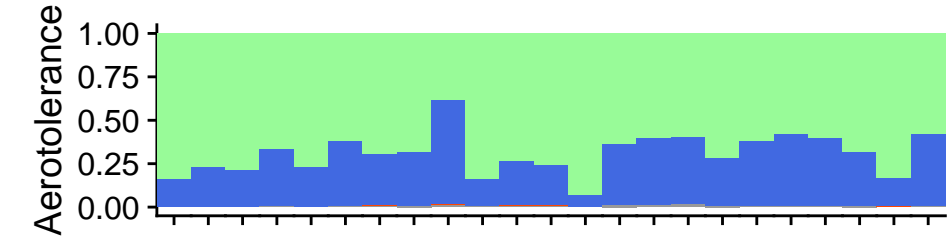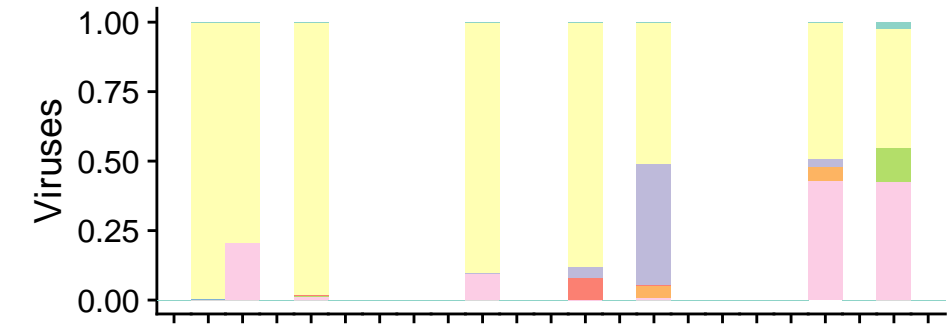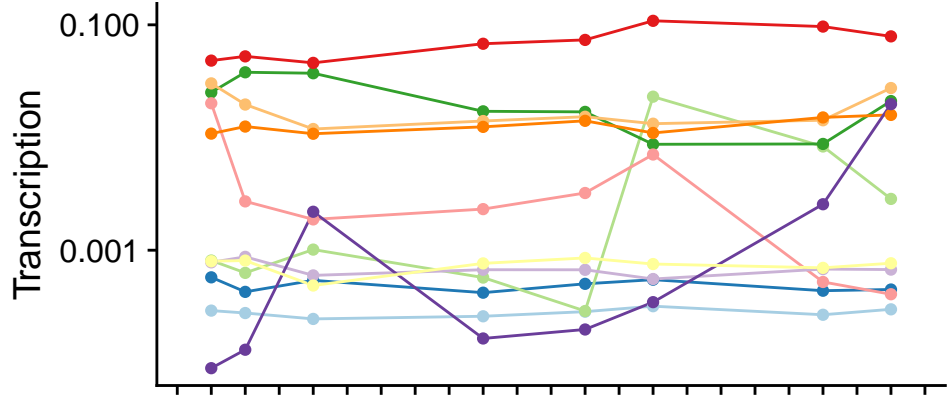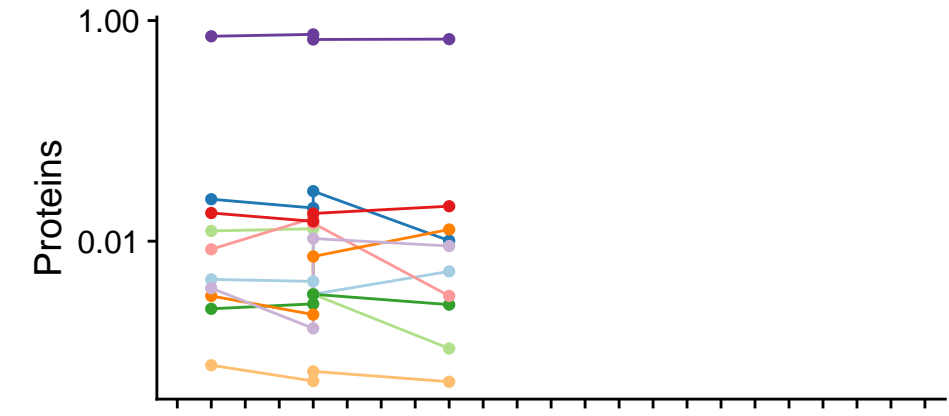

*Bacteroides caccae*  
*Bacteroides dorei*  
*Bacteroides uniformis*  
*Bacteroides vulgatus*  
*Bacteroides massiliensis*  
*Prevotella copri*  
*Eubacterium rectale*  
*Eubacterium siraeum*  
*Faecalibacterium prausnitzii*  
*Subdoligranulum unclassified*  
other

*Alistipes shahii*  
*Bacteroides caccae*  
*Bacteroides dorei*  
*Bacteroides vulgatus*  
*Bacteroides massiliensis*  
*Prevotella copri*  
*Eubacterium siraeum*  
*Faecalibacterium prausnitzii*  
*Escherichia coli*  
other  
unclassified

obligate\_anaerobe  
aerotolerant  
facultative\_anaerobe  
unknown

unclassified Siphoviridae  
Gokushovirus WZ-2015a  
Pepper mild mottle virus  
Tomato mosaic virus  
Grapevine fleck virus  
Human smacovirus 1  
Smacovirusgroup  
Human feces pecovirus  
other

K00705: 4-alpha-glucanotransferase [EC:2....  
K00928: aspartate kinase [EC:2.7.2.4]  
K01990: ABC-2 type transport system ATP-...  
K02078: acyl carrier protein  
K02128: F-type H+-transporting ATPase sub...  
K02914: large subunit ribosomal protein L34  
K02950: small subunit ribosomal protein S12  
K03088: RNA polymerase sigma-70 factor, E...  
K03569: rod shape-determining protein Mre...  
K04069: pyruvate formate lyase activating en...  
K08303: putative protease [EC:3.4.-.-]

K00134: glyceraldehyde 3-phosphate dehydr...  
K00262: glutamate dehydrogenase (NADP+) ...  
K00626: acetyl-CoA C-acetyltransferase [E...  
K00927: phosphoglycerate kinase [EC:2.7.2.3]  
K01006: pyruvate, orthophosphate dikinase [...  
K02358: elongation factor EF-Tu  
K02948: small subunit ribosomal protein S11  
K04043: molecular chaperone DnaK  
K04077: chaperonin GroEL  
UNGROUPED

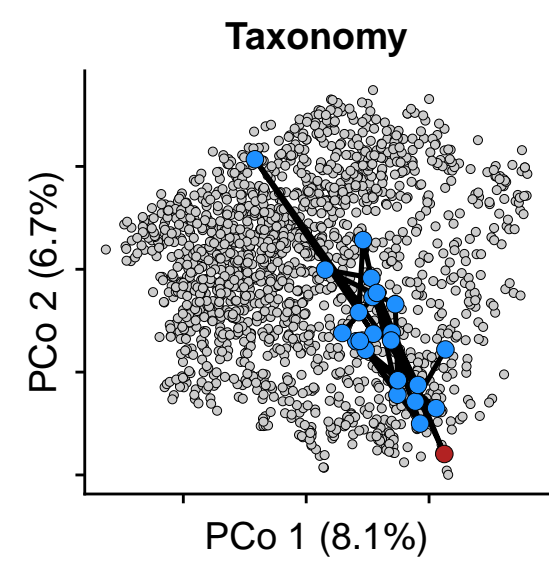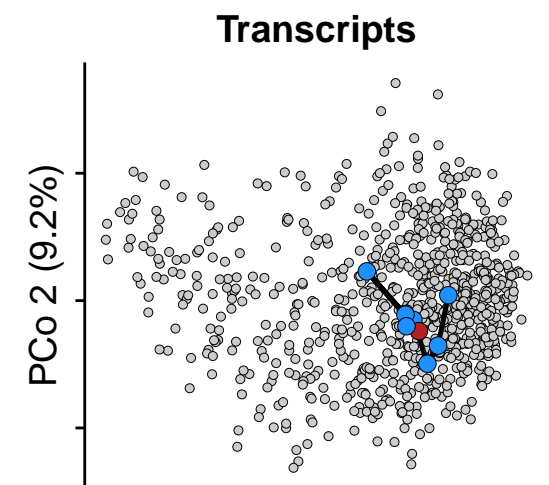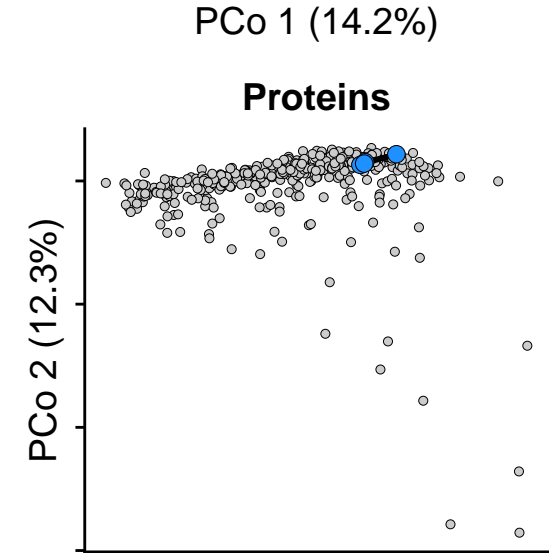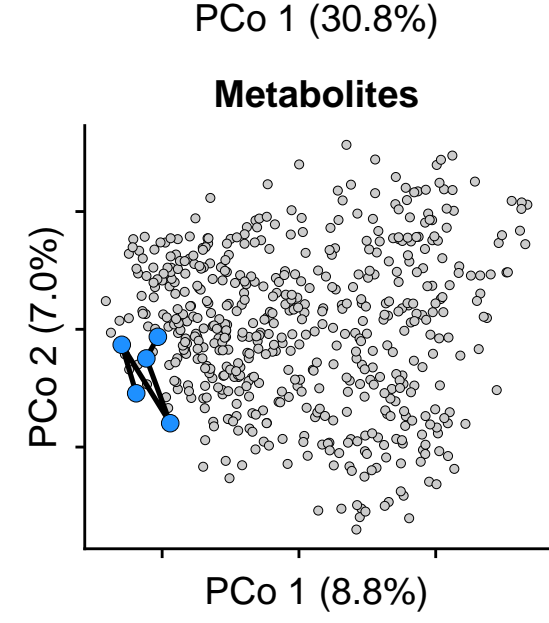

Taxonomy

Transcripts

Proteins

Metabolites

M2047: 57 Male White MGH | nonIBD

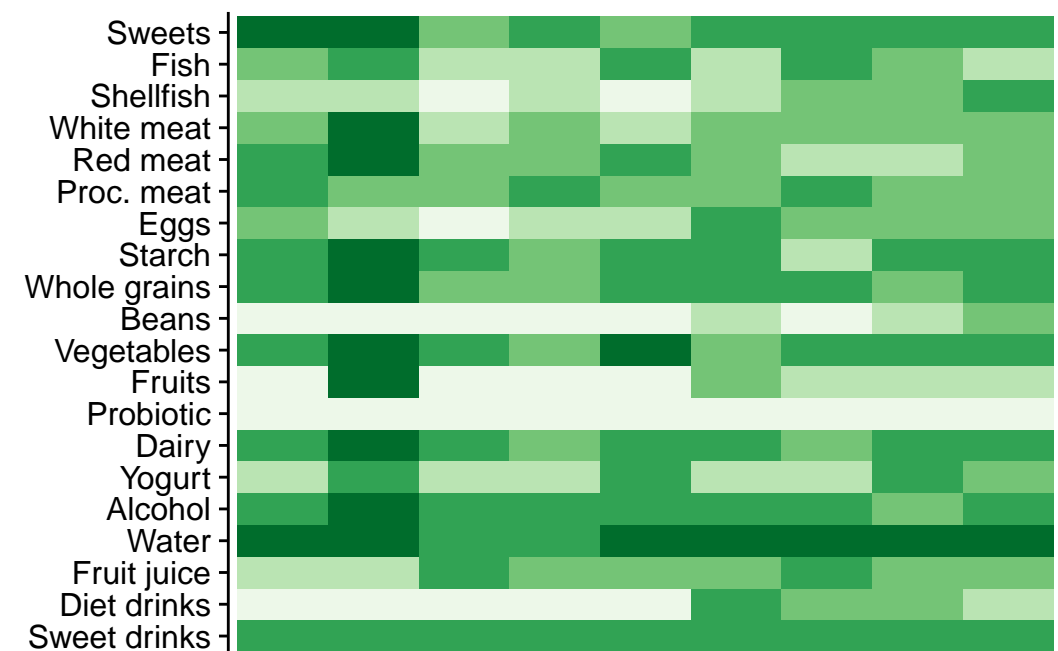

None 7+ days  
Within 4-7 days  
Within 2-3 days  
Yesterday 1-2x  
Yesterday 3x+

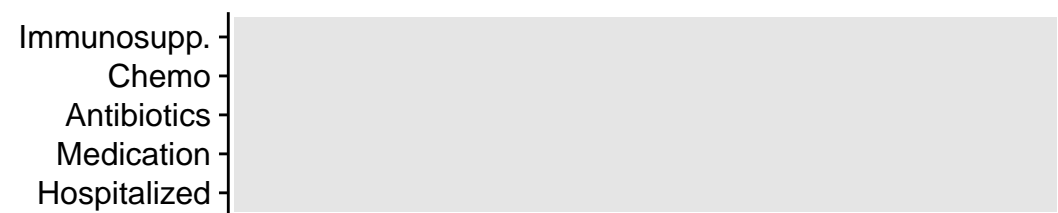

No

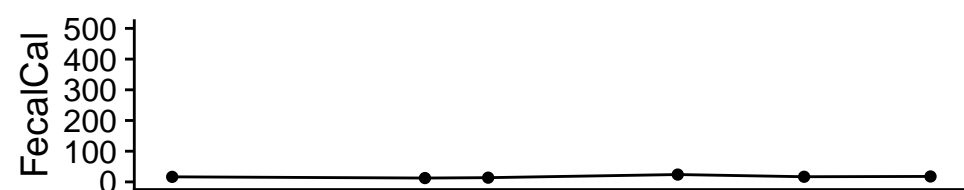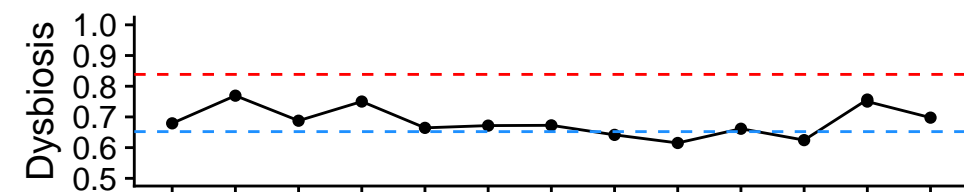

Dysbiosis  
Eubiosis

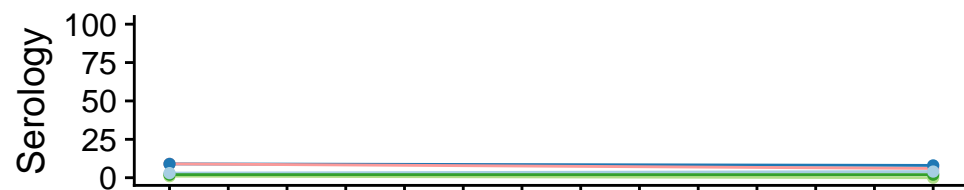

ANCA EU  
Cbir1 EU  
IgA ASCA EU  
IgG ASCA EU  
OmpC. EU

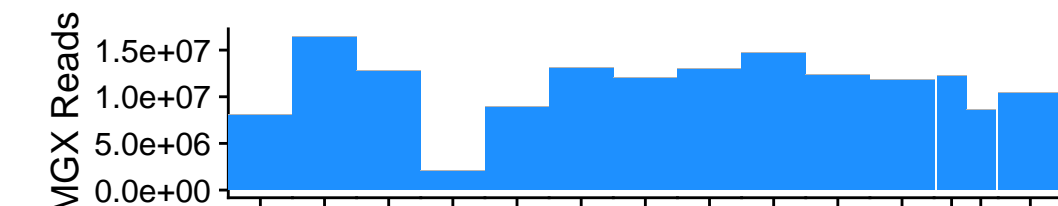

Human  
Filtered

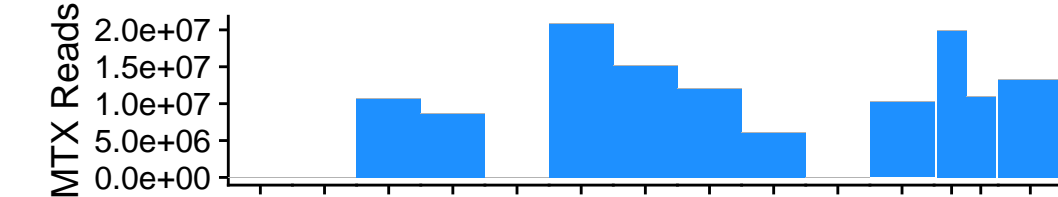

Human  
Filtered

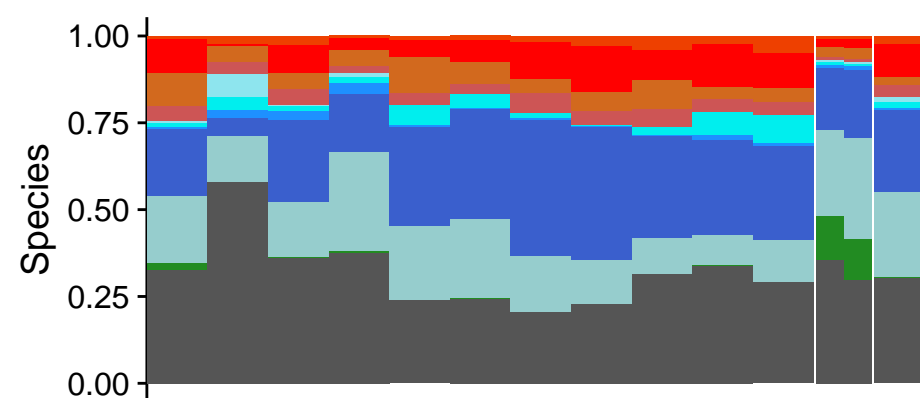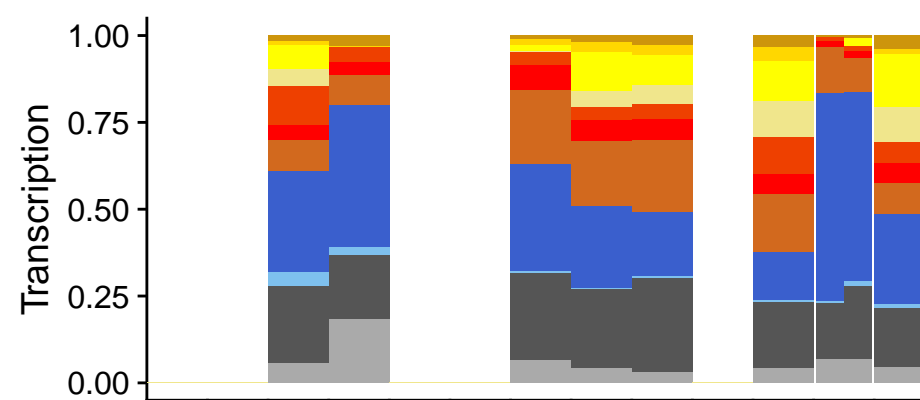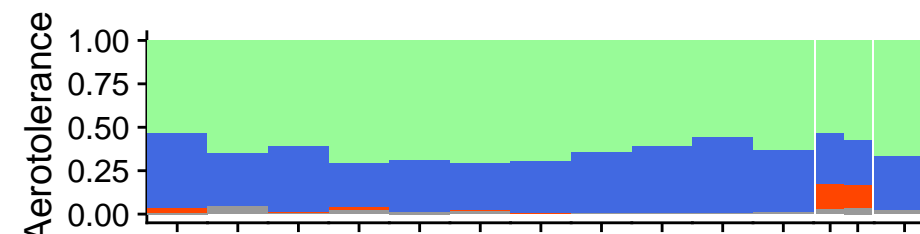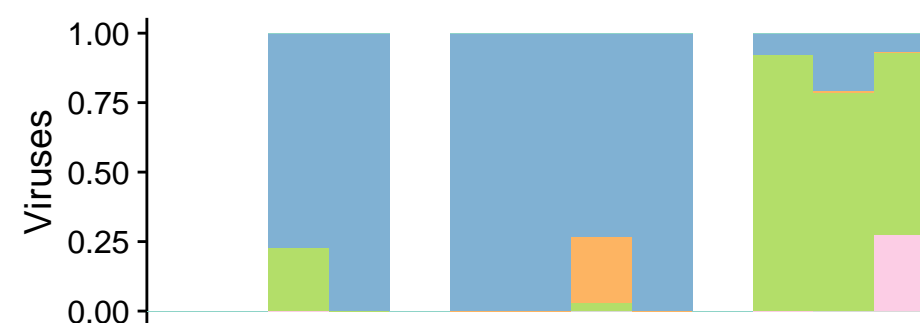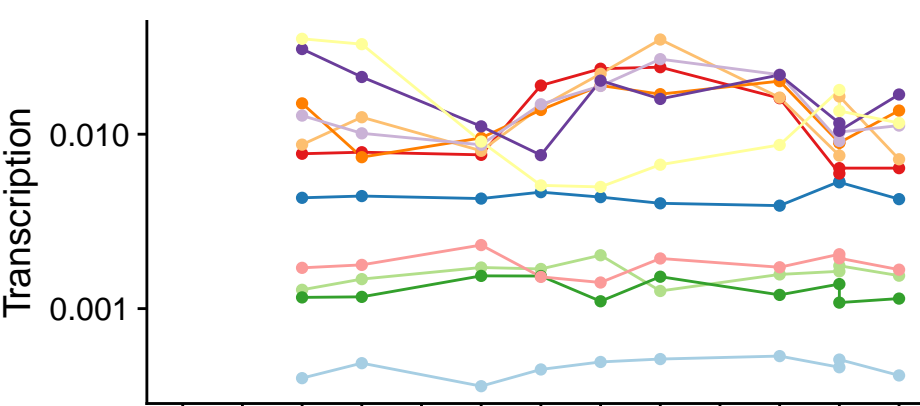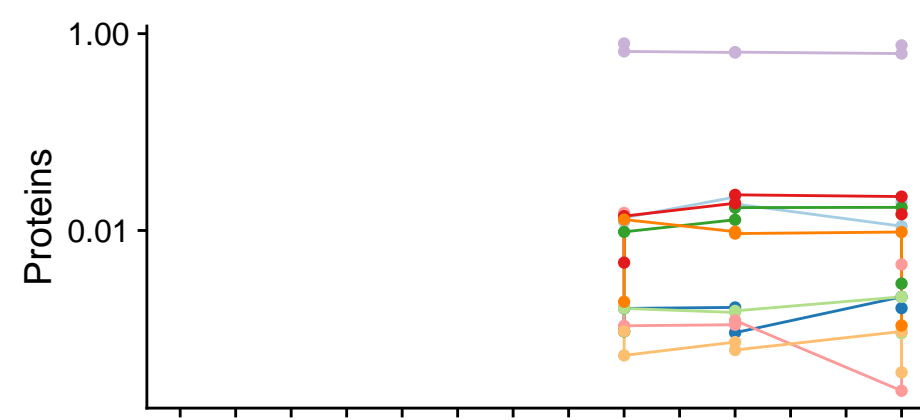

Taxonomy

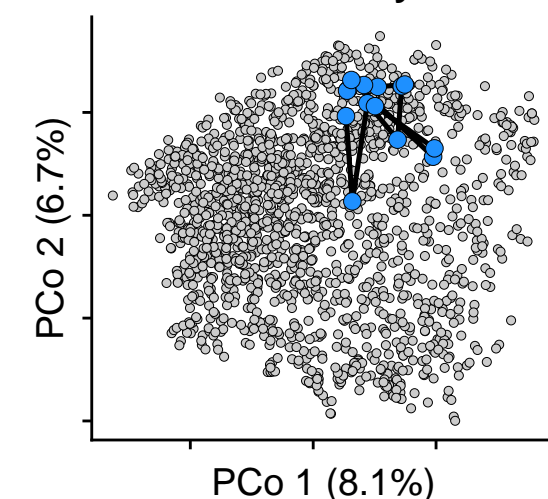

Transcripts

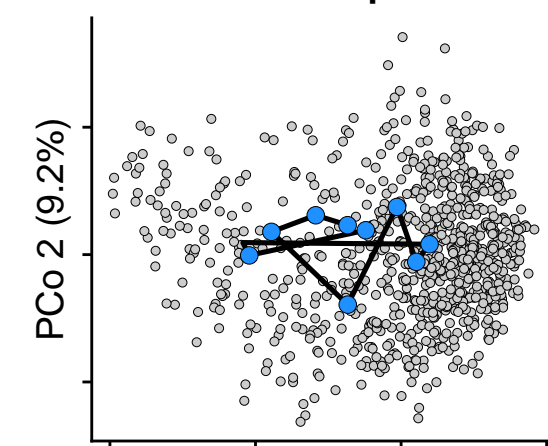

Proteins

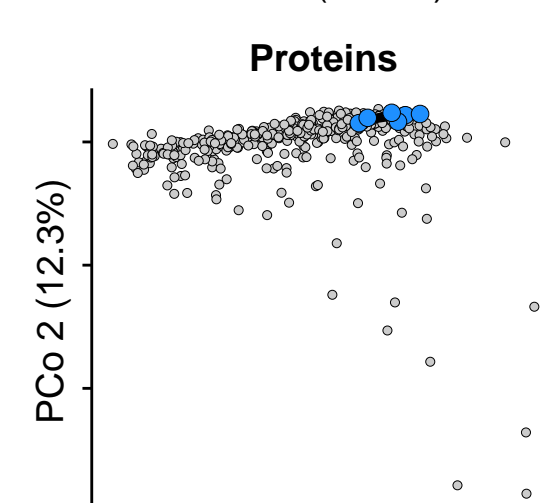

Metabolites

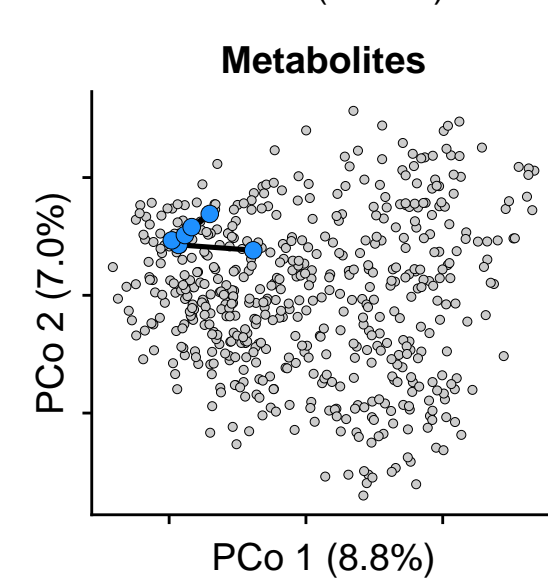



M2048: 28 Male White MGH | nonIBD

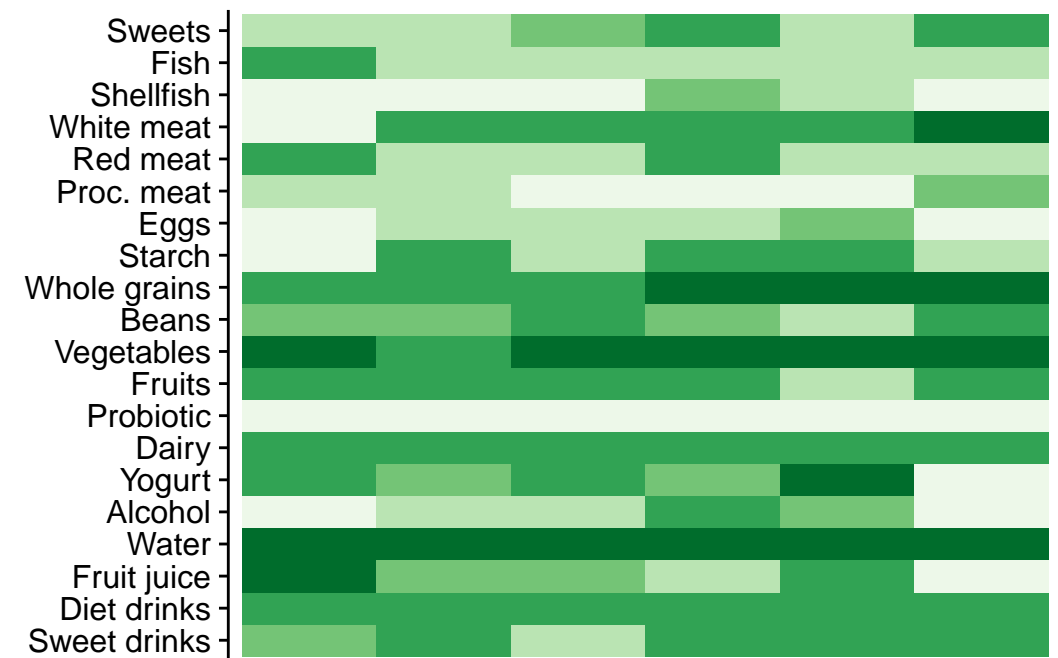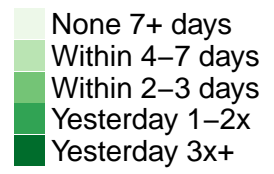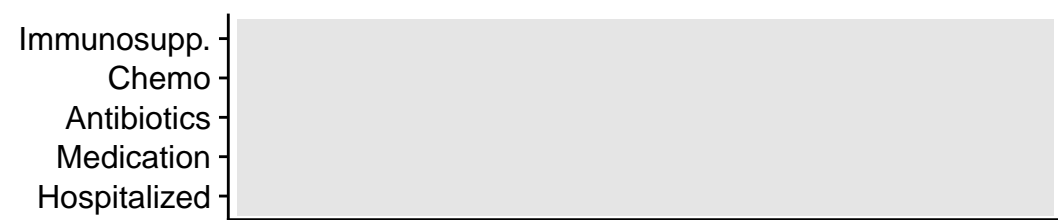

FecalCal

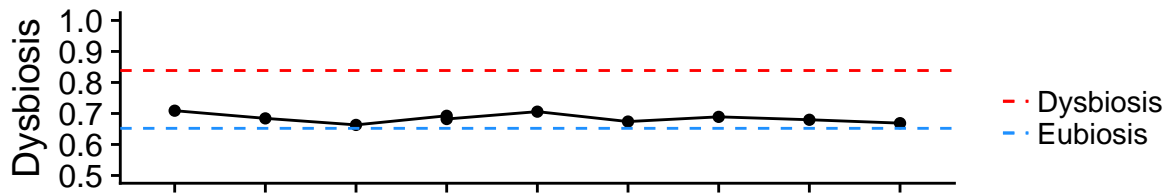

Serology

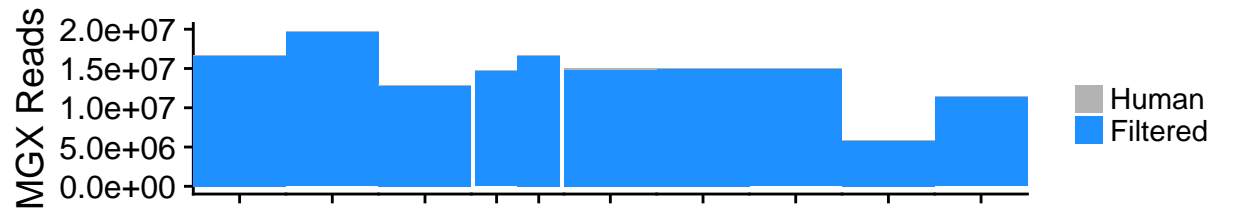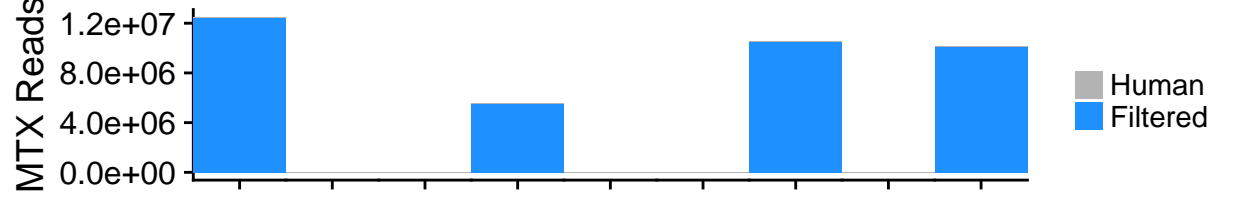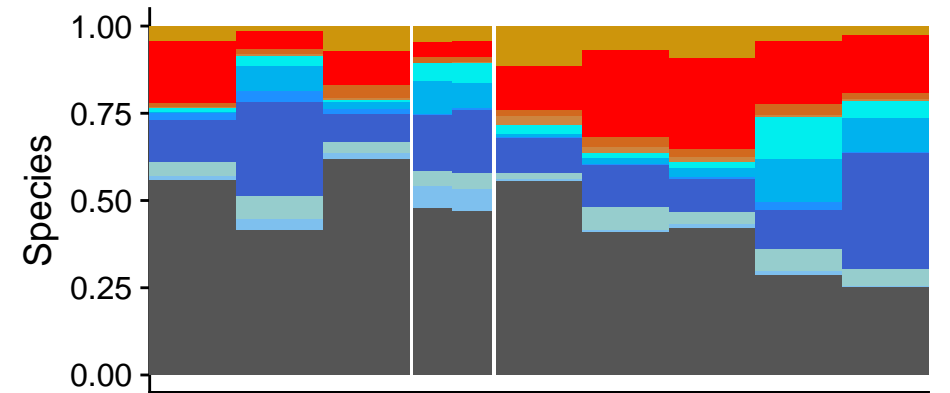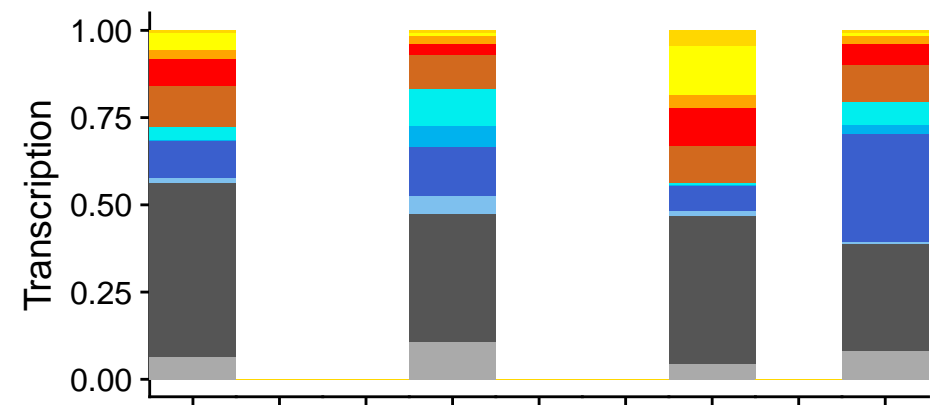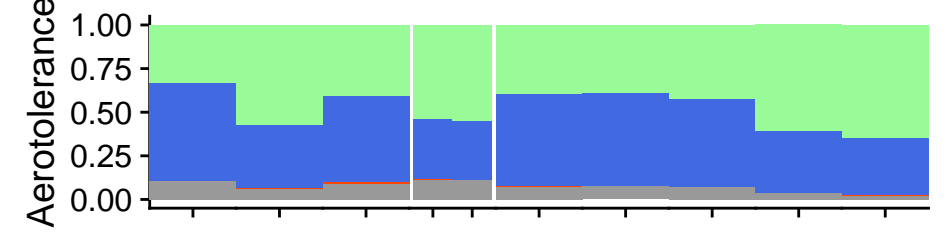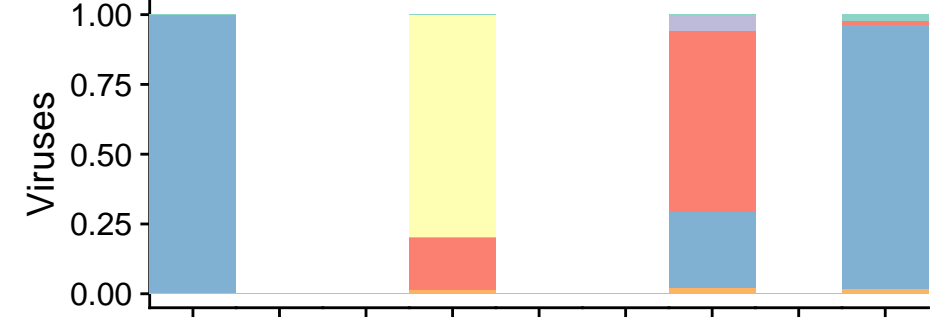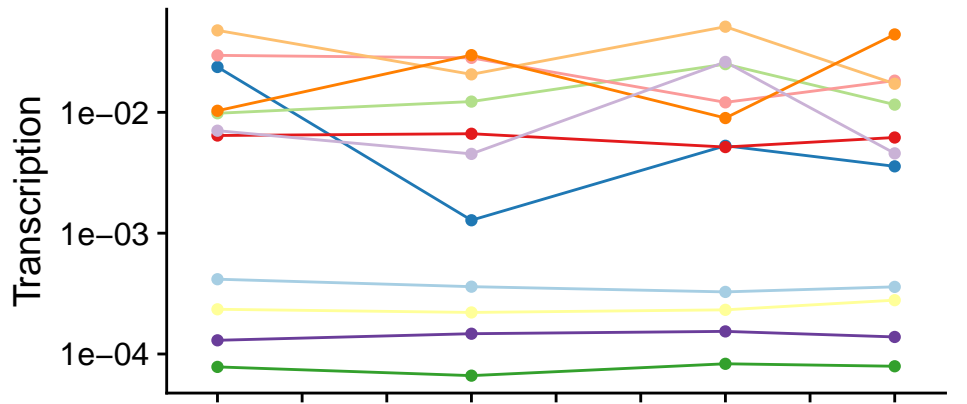

Proteins

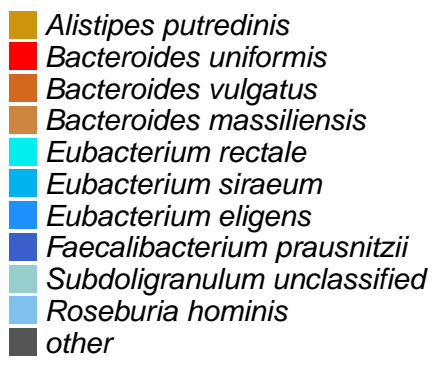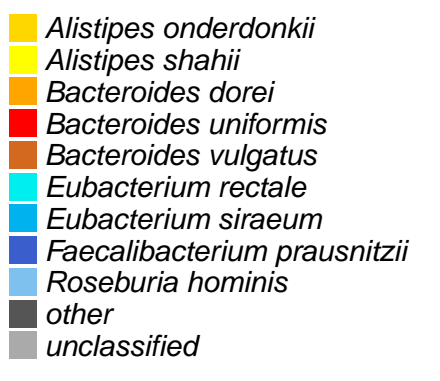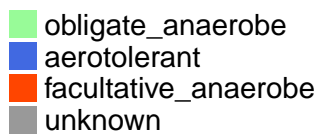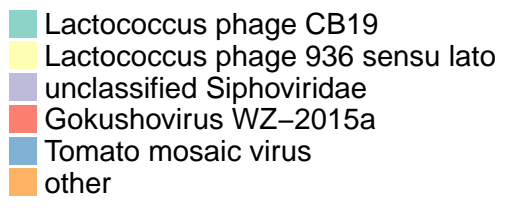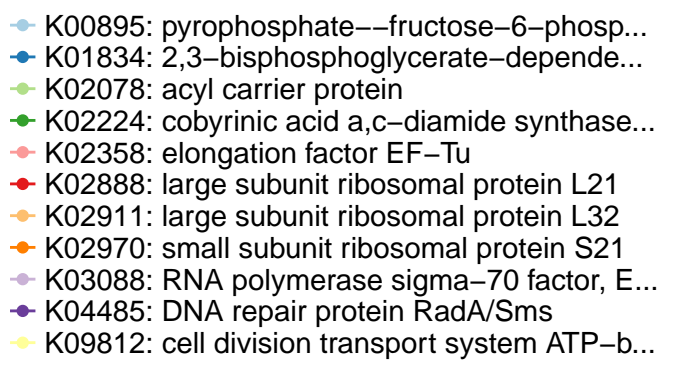

No

Dysbiosis  
Eubiosis

Human  
Filtered

Human  
Filtered

Taxonomy

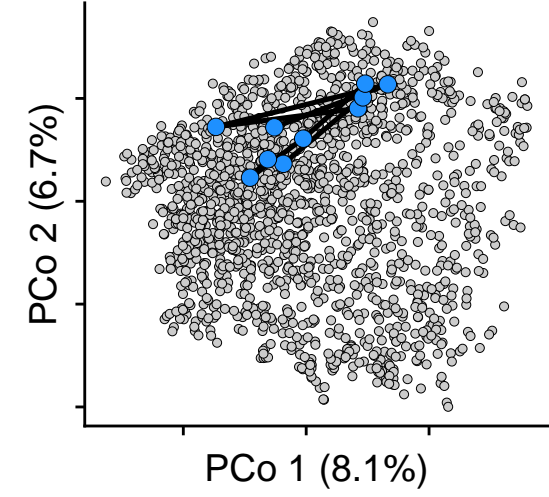

Transcripts

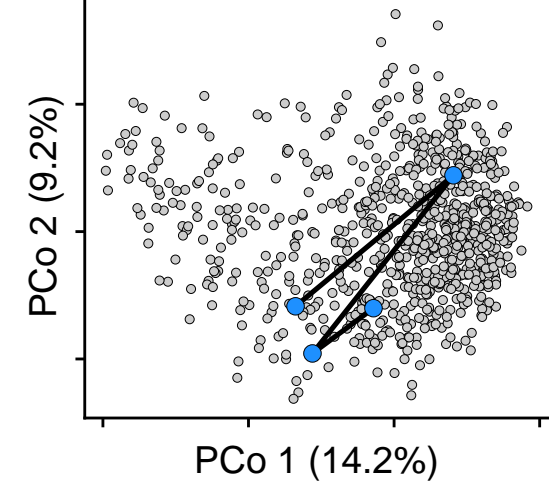

Proteins

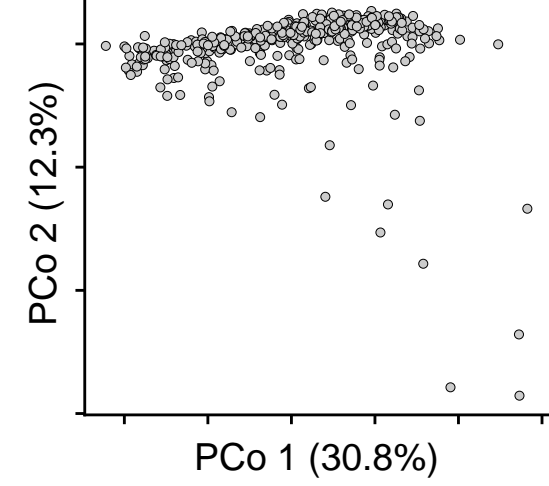

Metabolites

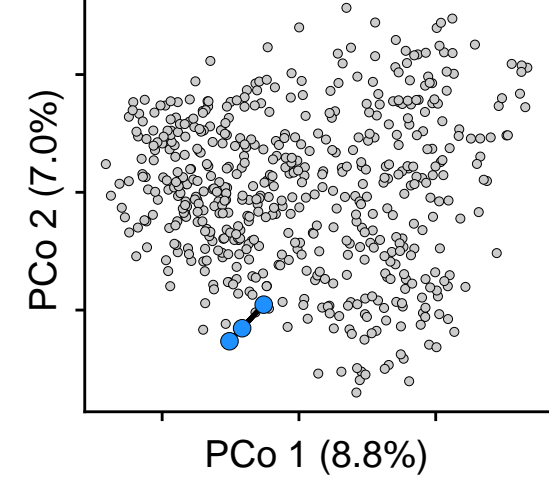

M2060: 62 Female White MGH | nonIBD

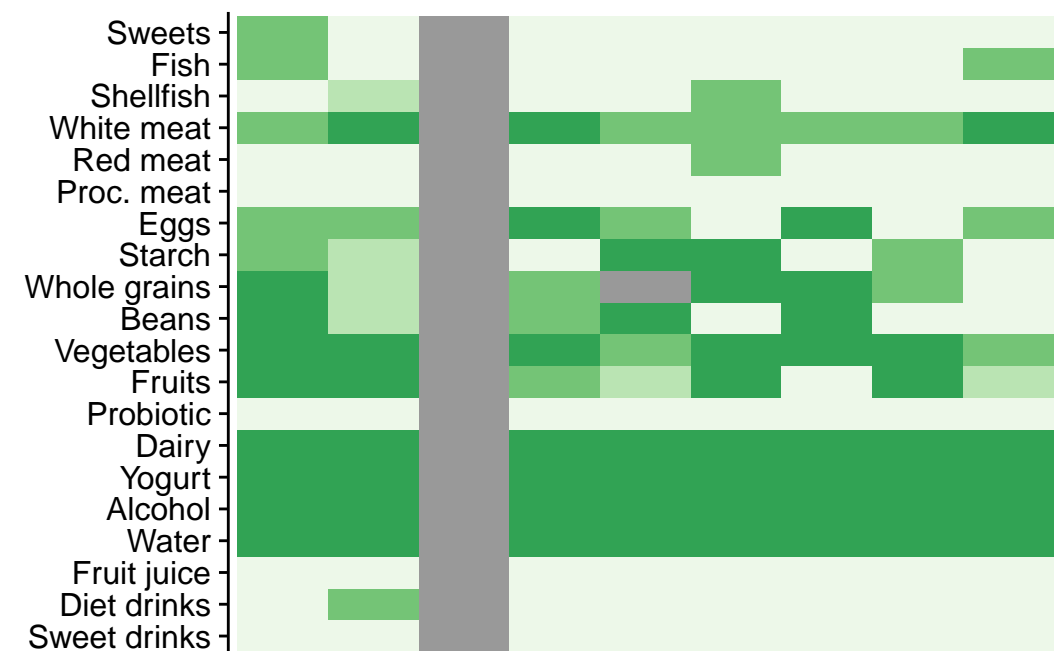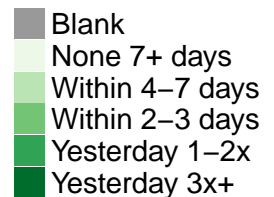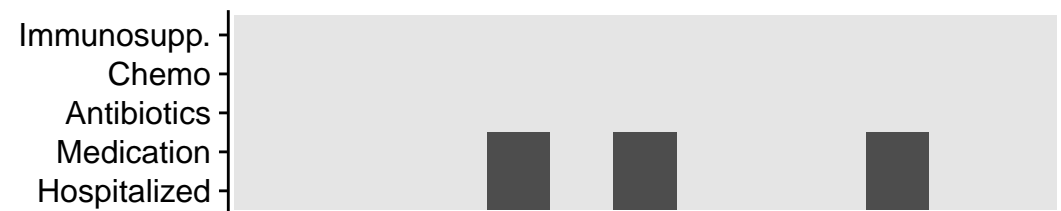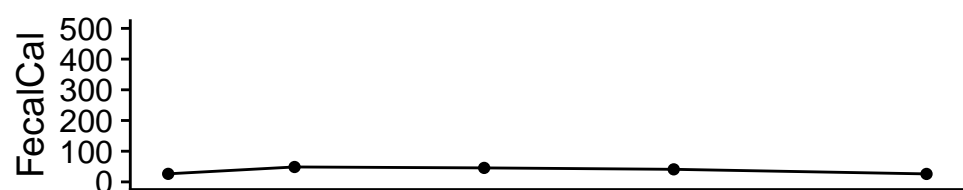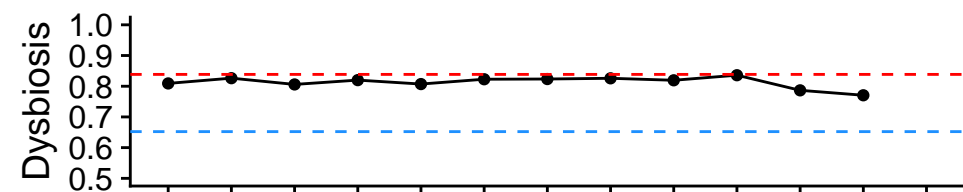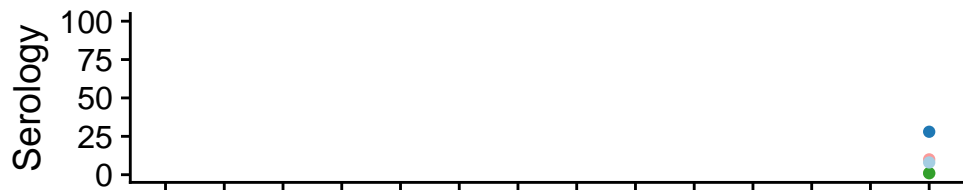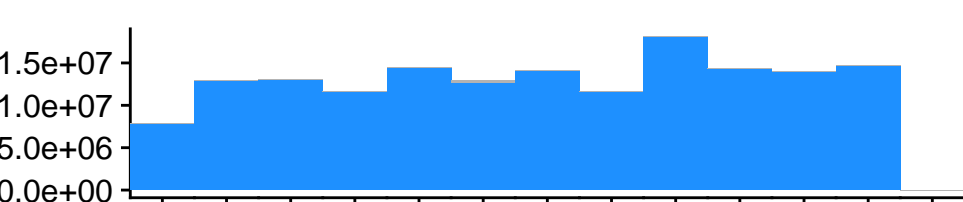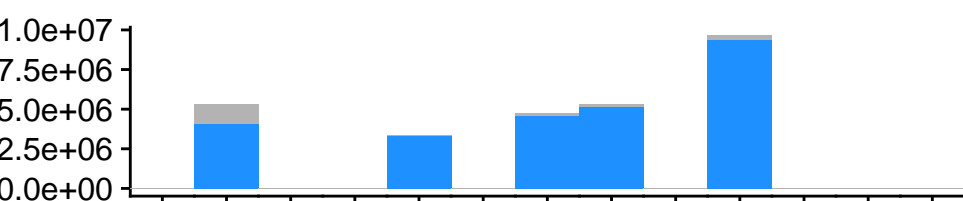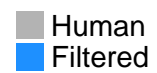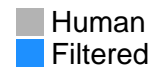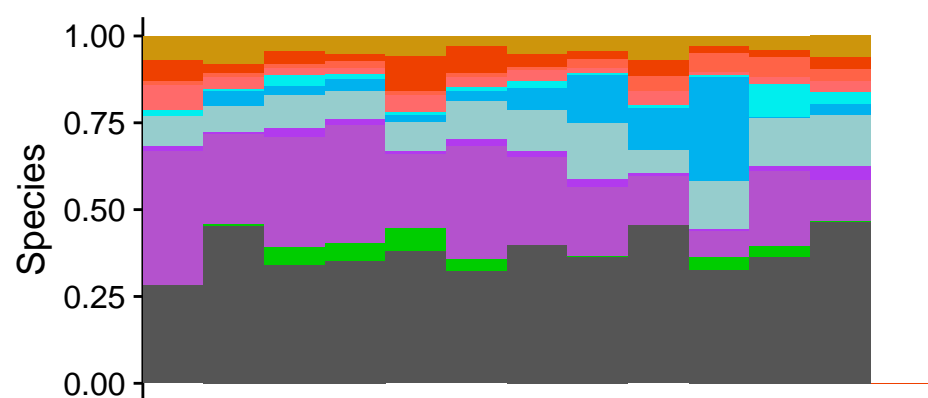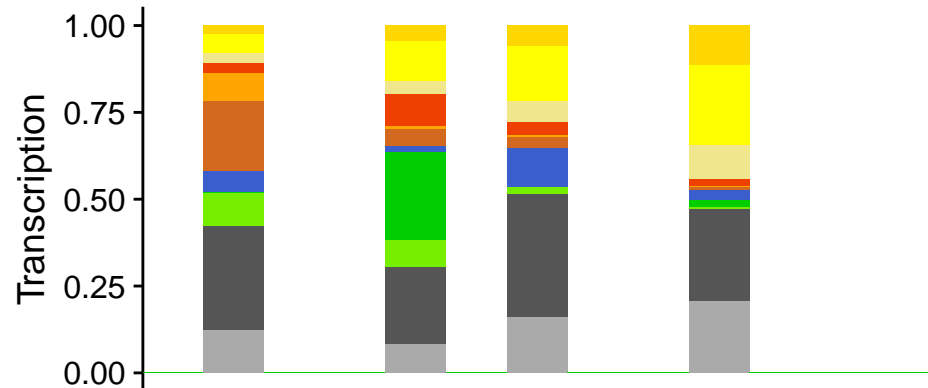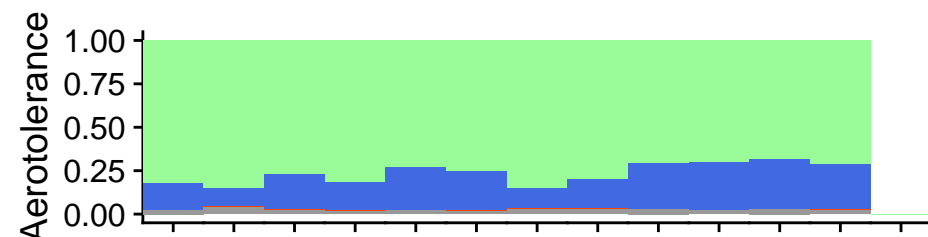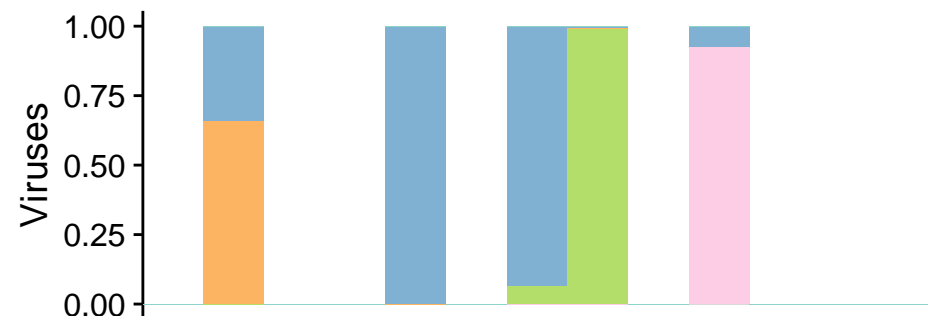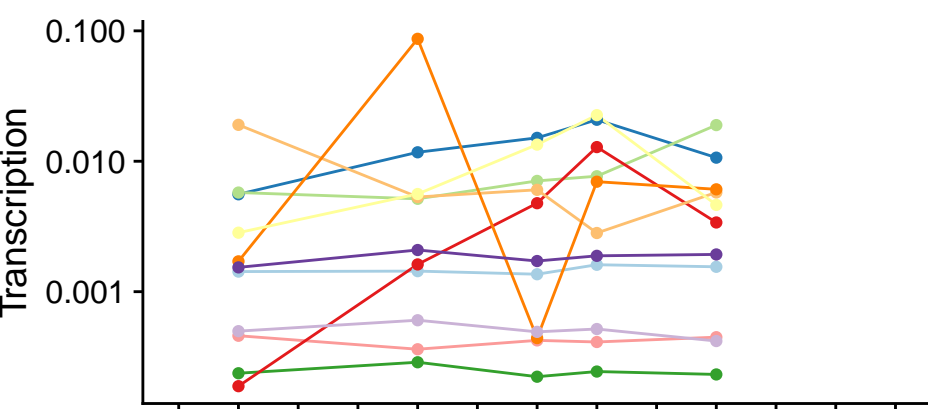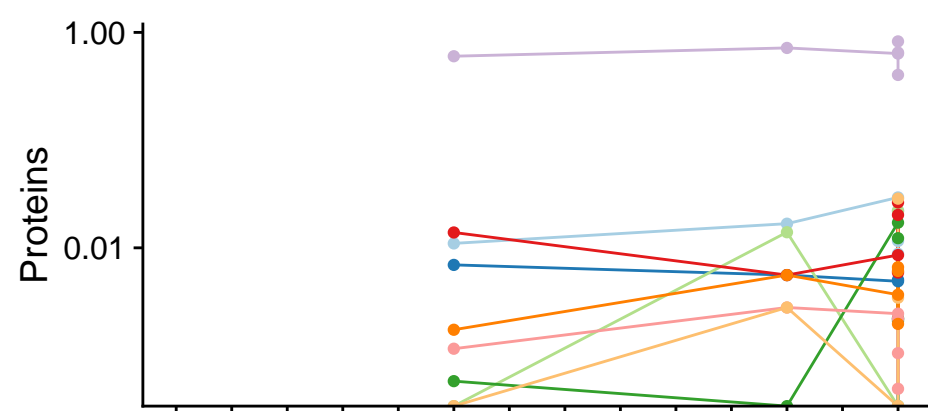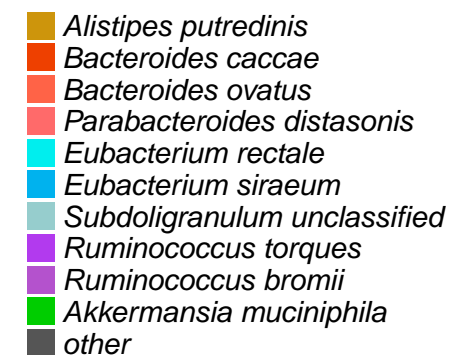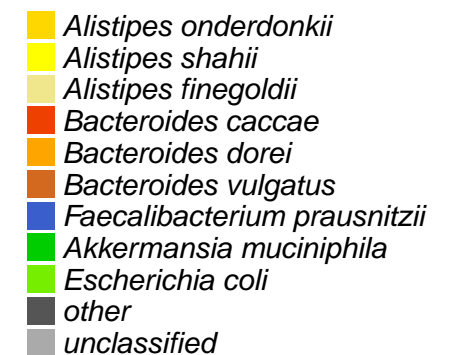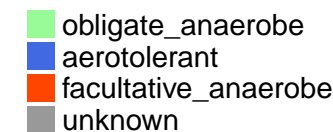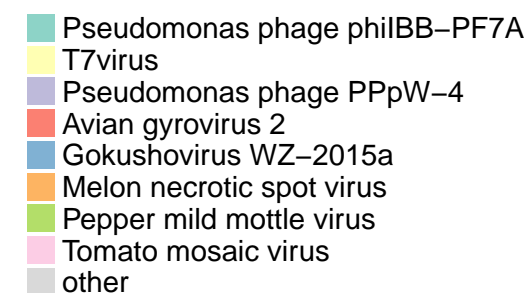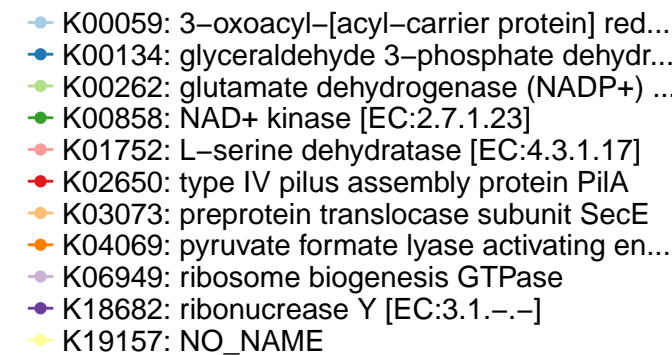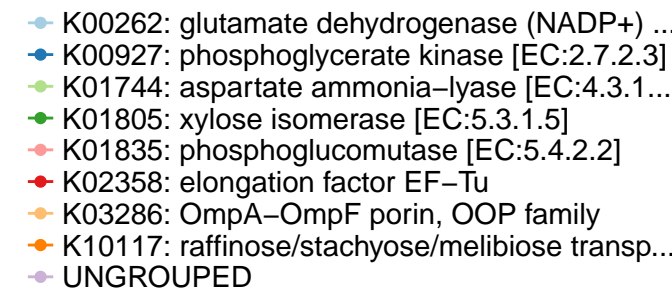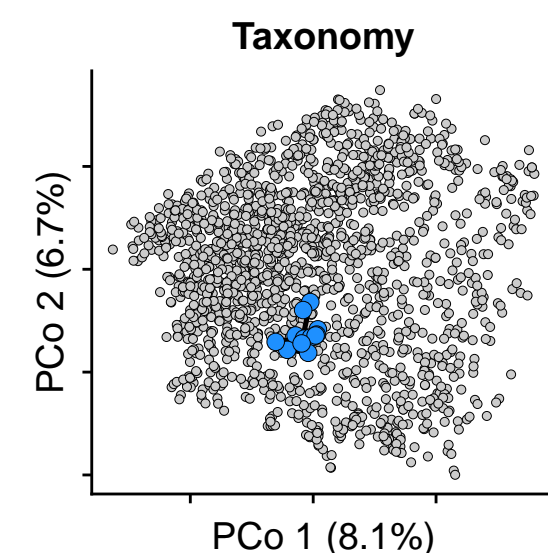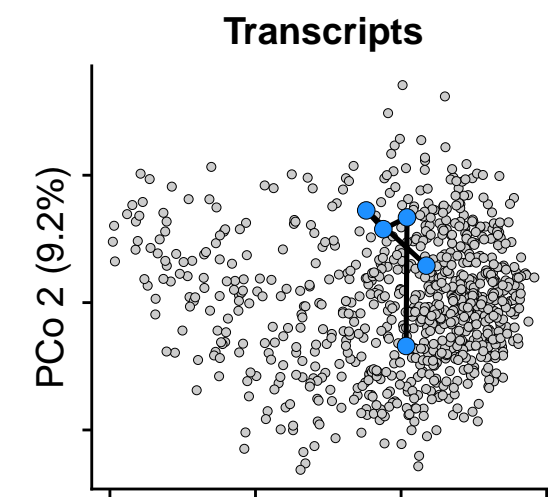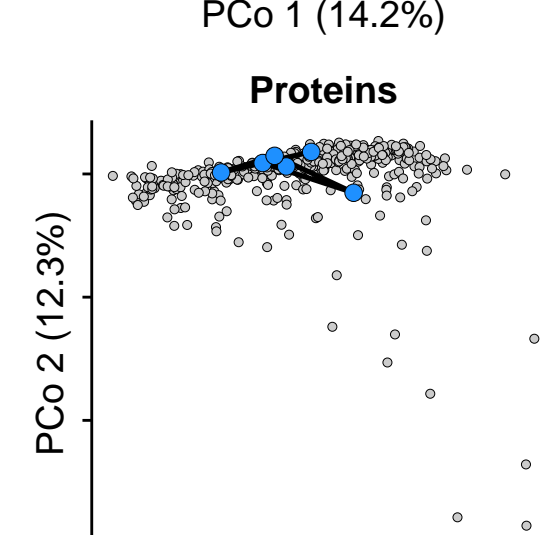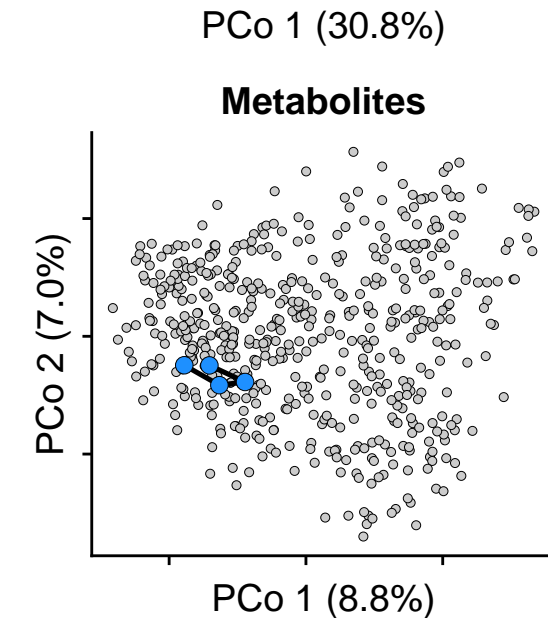

M2061: 56 Male White MGH | nonIBD

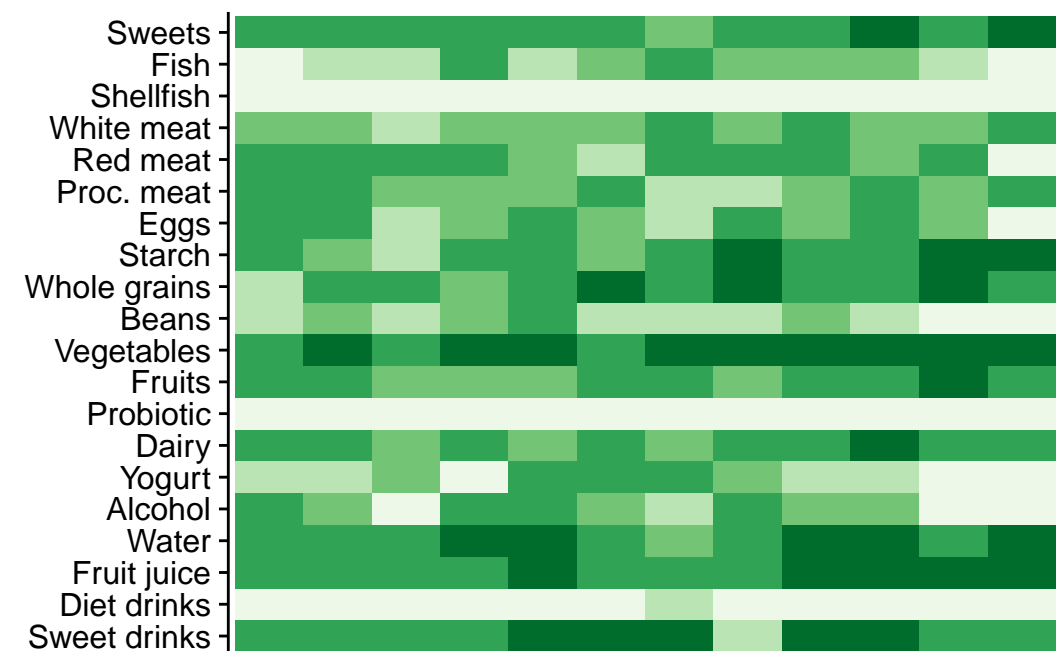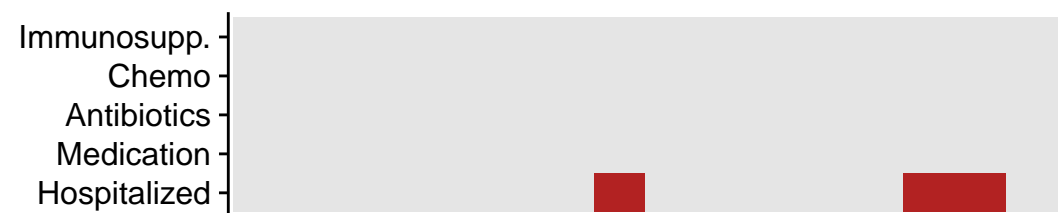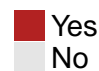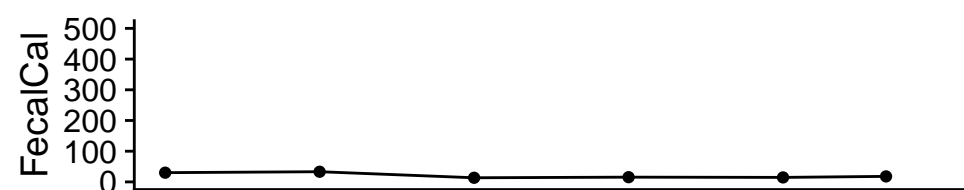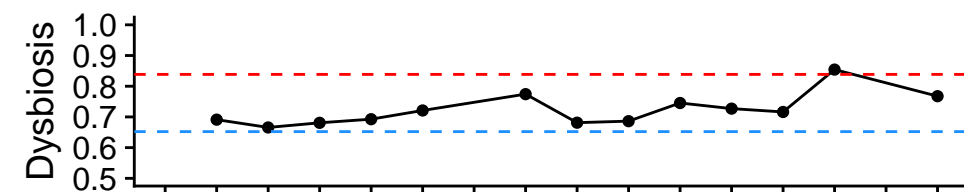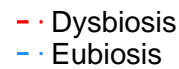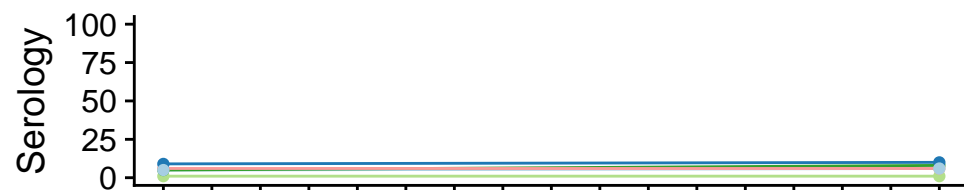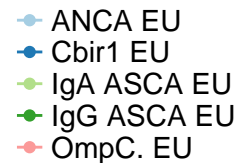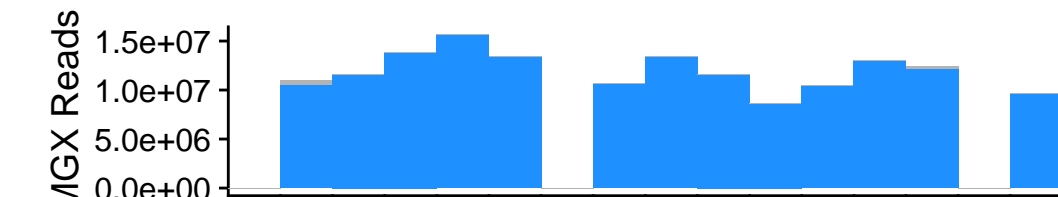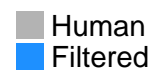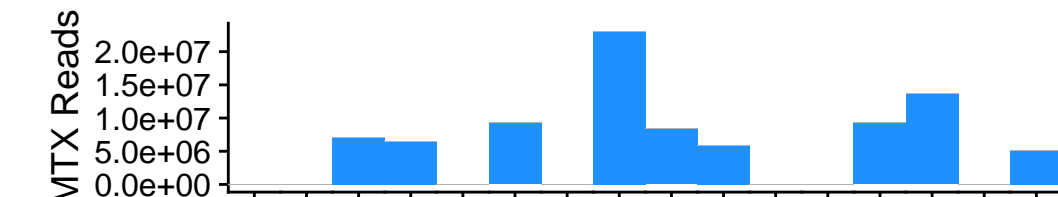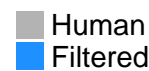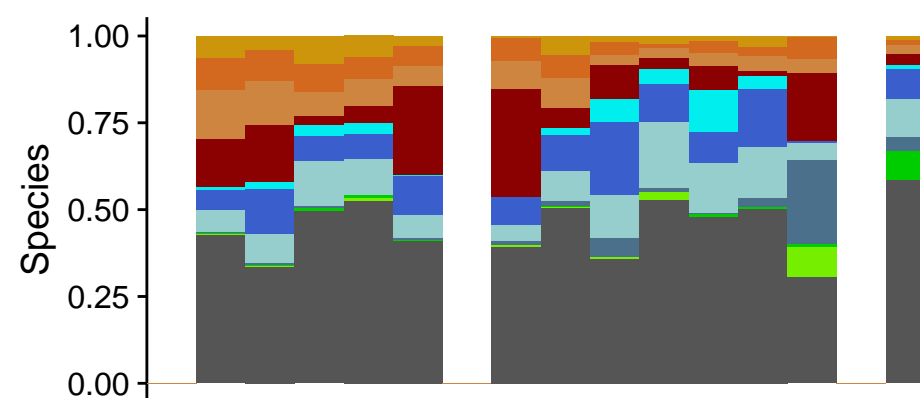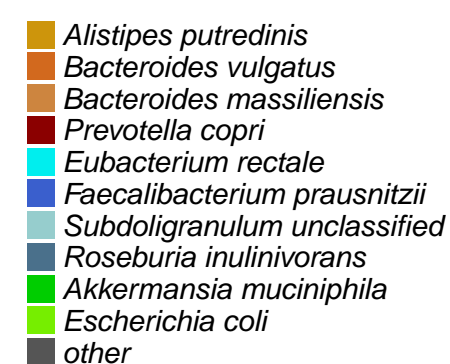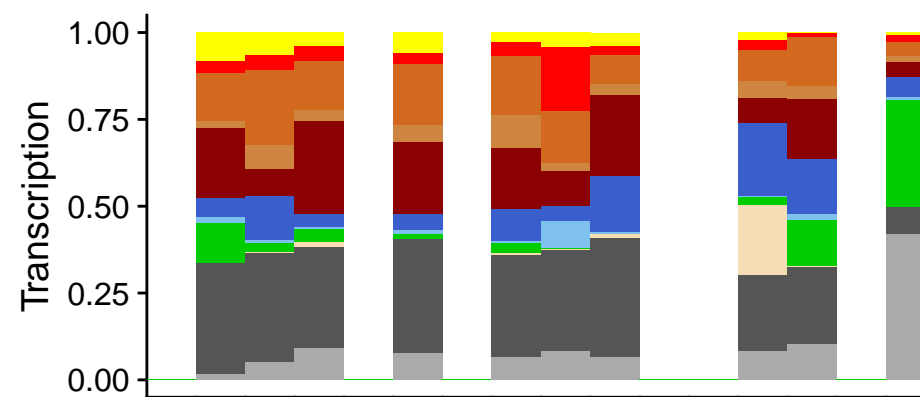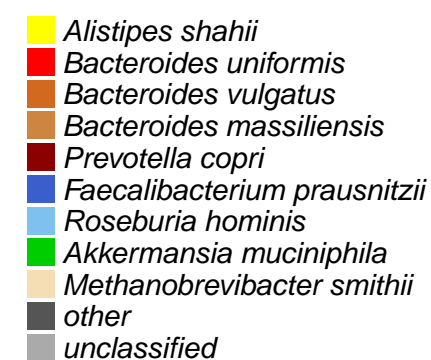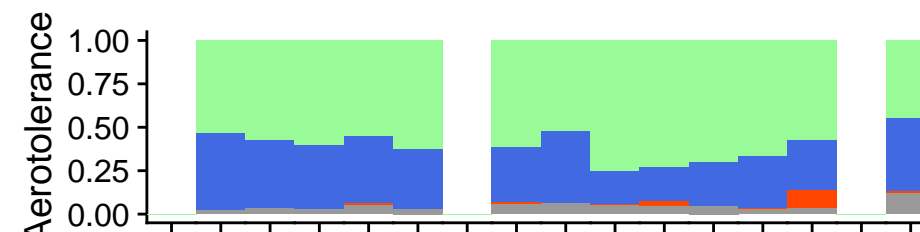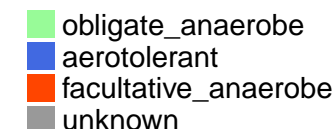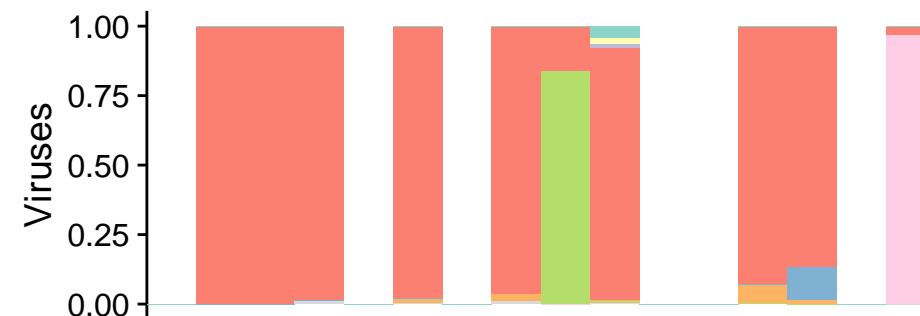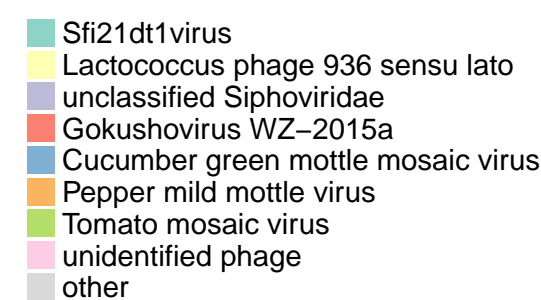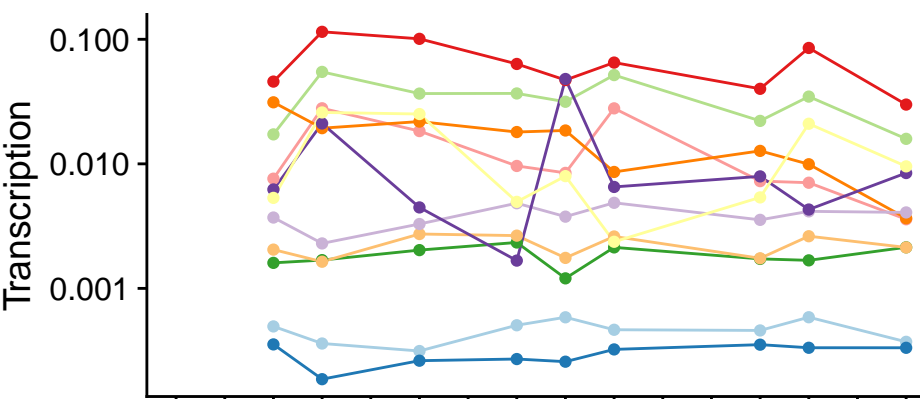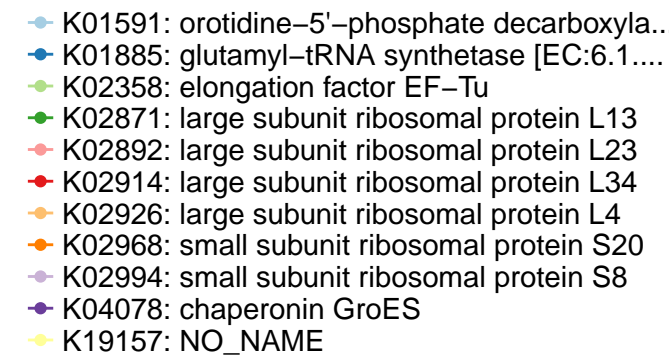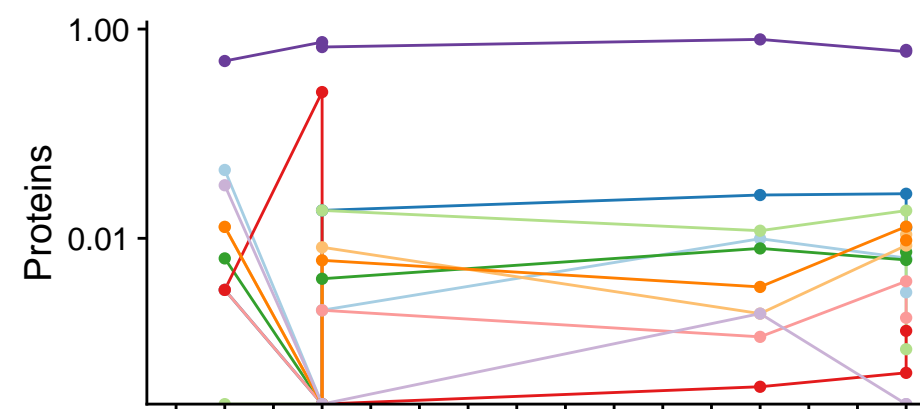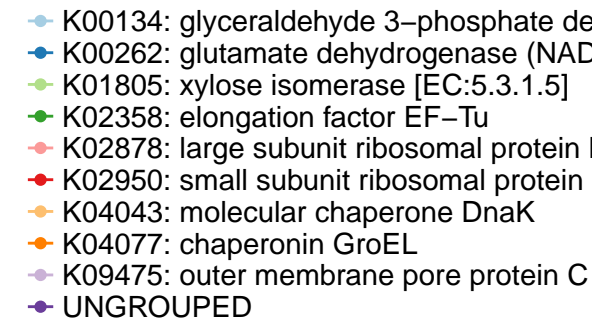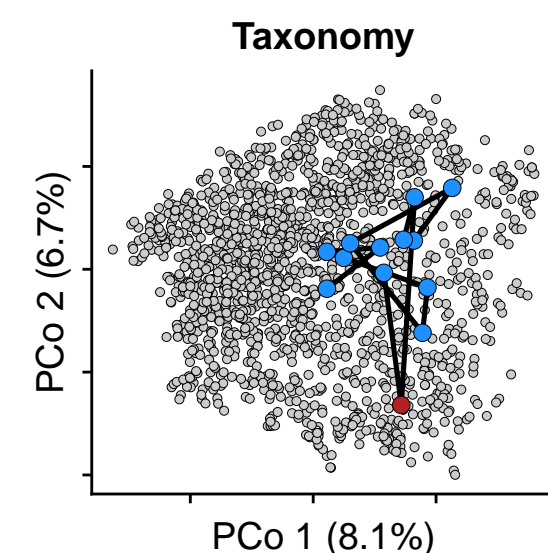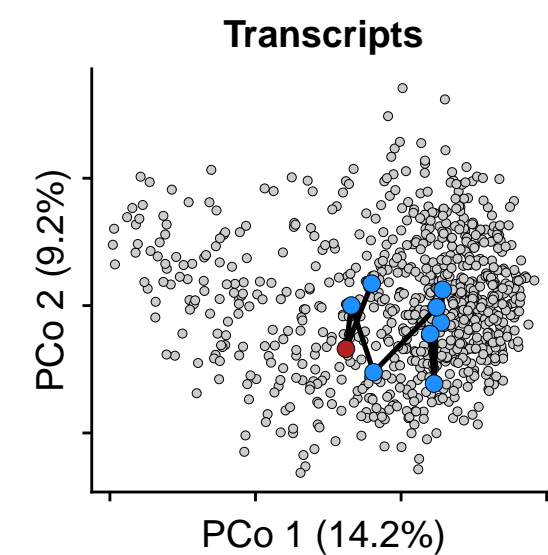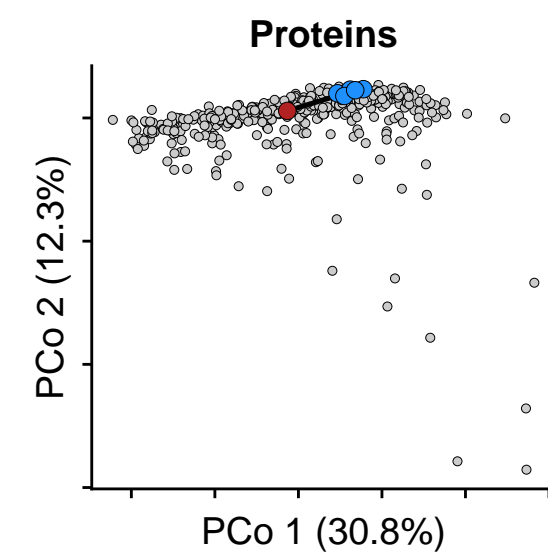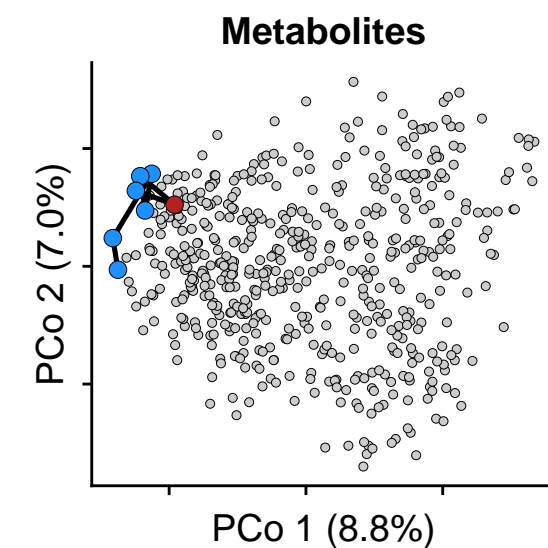

M2064: 74 Male More than one race MGH | UC

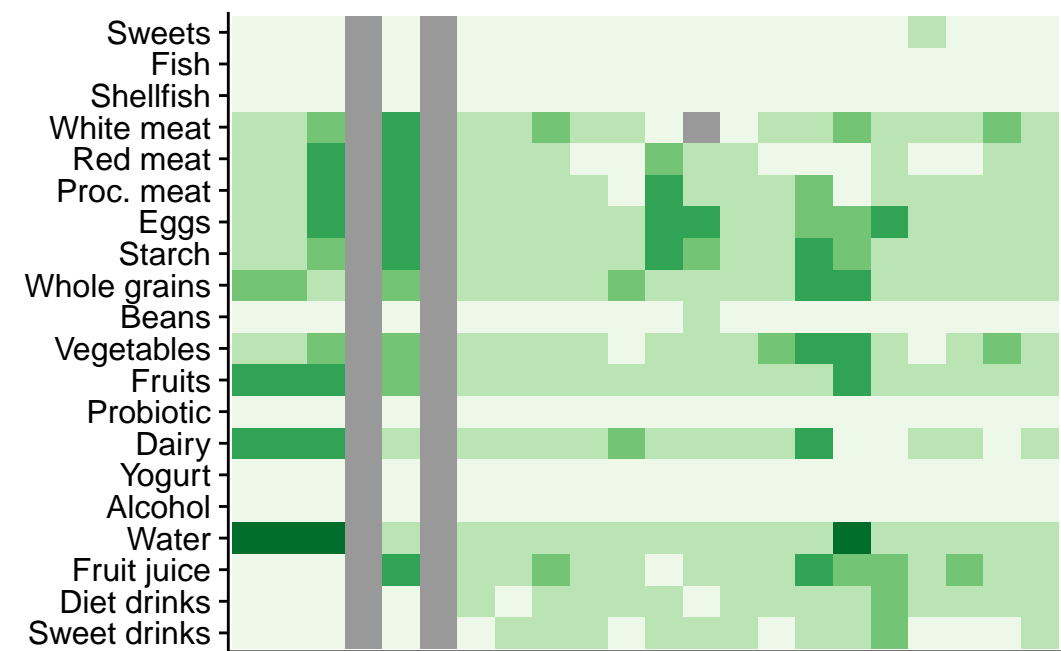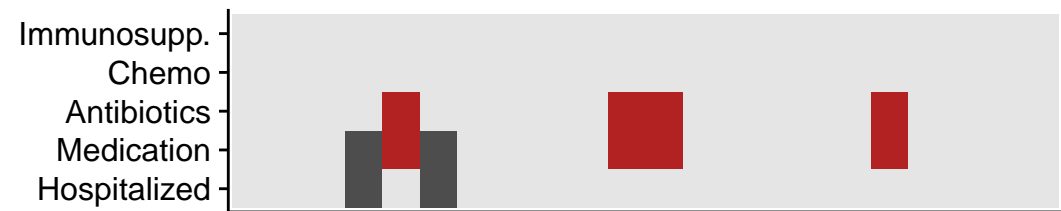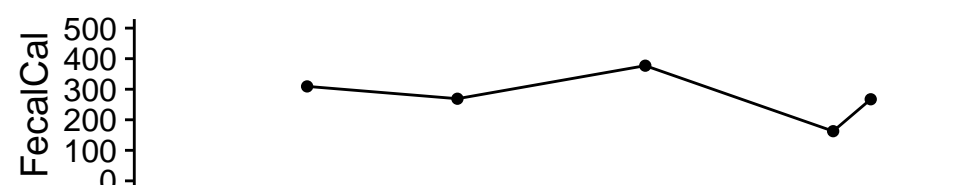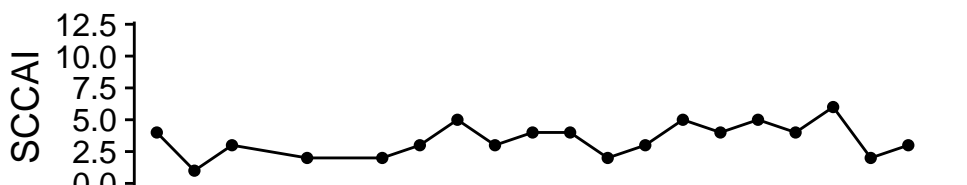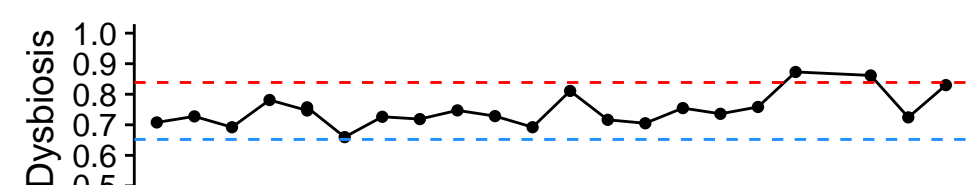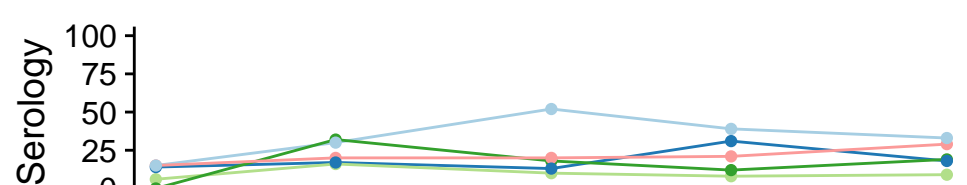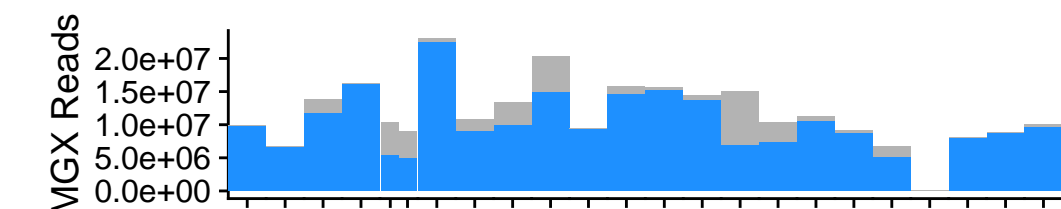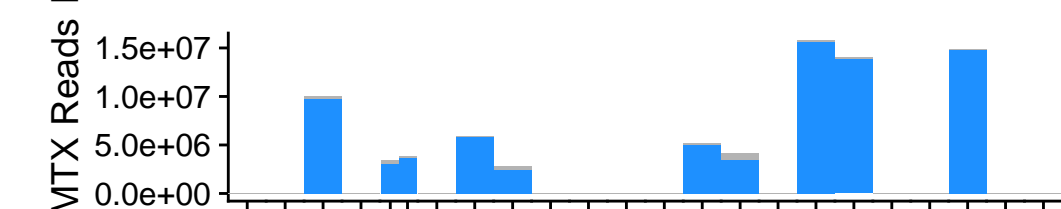

Blank  
None 7+ days  
Within 4-7 days  
Within 2-3 days  
Yesterday 1-2x  
Yesterday 3x+

Yes  
No  
Blank

Dysbiosis  
Eubiosis

ANCA EU  
Cbir1 EU  
IgA ASCA EU  
IgG ASCA EU  
OmpC. EU

Human  
Filtered

Human  
Filtered

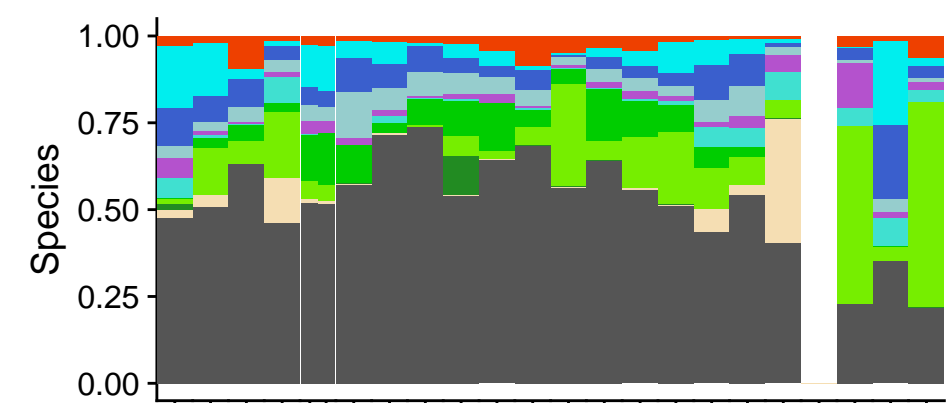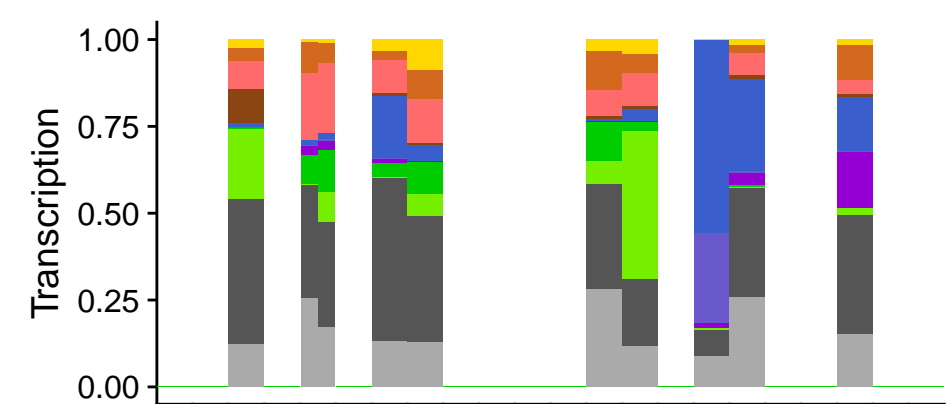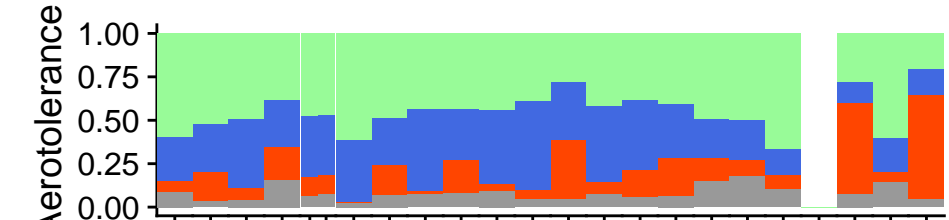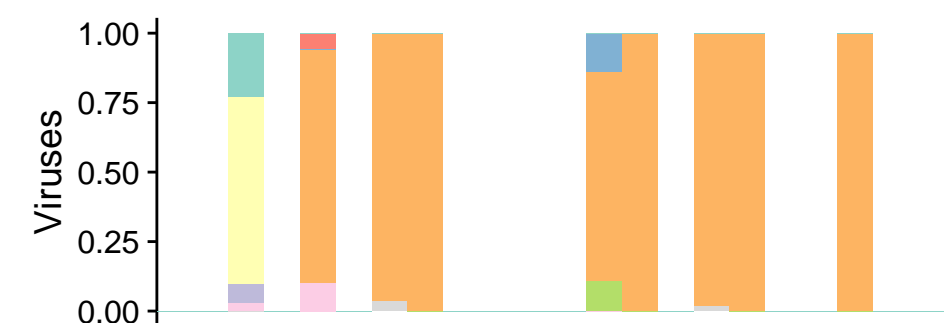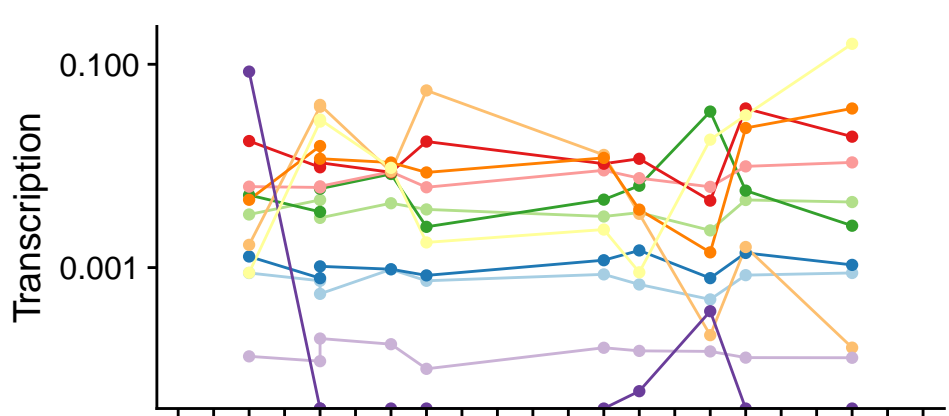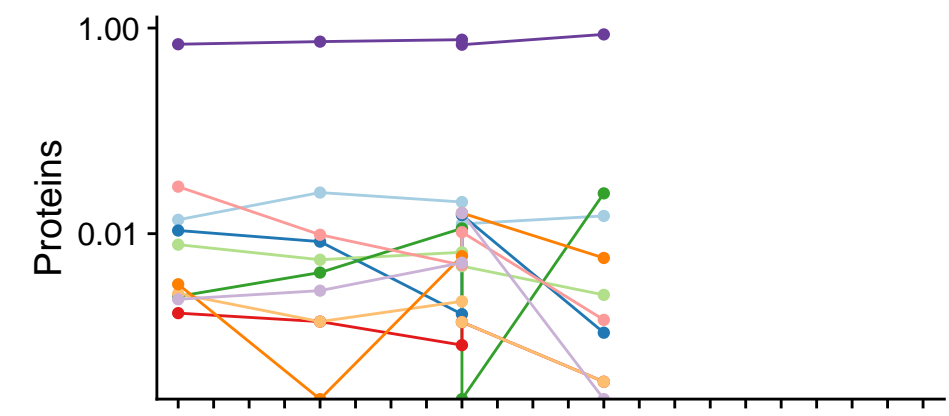

*Bacteroides caccae*  
*Eubacterium rectale*  
*Faecalibacterium prausnitzii*  
*Subdoligranulum unclassified*  
*Ruminococcus bromii*  
*Phascolarctobacterium succinatutens*  
*Akkermansia muciniphila*  
*Escherichia coli*  
*Haemophilus parainfluenzae*  
*Methanobrevibacter smithii*  
other

*Alistipes onderdonkii*  
*Bacteroides vulgatus*  
*Parabacteroides distasonis*  
*Odoribacter splanchnicus*  
*Faecalibacterium prausnitzii*  
*Roseburia intestinalis*  
*Ruminococcus obeum*  
*Akkermansia muciniphila*  
*Escherichia coli*  
other  
unclassified

obligate\_anaerobe  
aerotolerant  
facultative\_anaerobe  
unknown

Escherichia phage vB EcoM AY0145A  
Escherichia phage vB EcoM-VpaE1  
unclassified Myoviridae  
Lactococcus phage M5938  
Human picobirnavirus  
Gokushovirus WZ-2015a  
Cucumber green mottle mosaic virus  
Tomato mosaic virus  
other

K01881: prolyl-tRNA synthetase [EC:6.1.1.15]  
K01939: adenylosuccinate synthase [EC:6.3....]  
K02906: large subunit ribosomal protein L3  
K02909: large subunit ribosomal protein L31  
K02911: large subunit ribosomal protein L32  
K02914: large subunit ribosomal protein L34  
K04069: pyruvate formate lyase activating en...  
K04078: chaperonin GroES  
K06001: tryptophan synthase beta chain [EC:...,  
K18920: NO\_NAME  
K19157: NO\_NAME

K00262: glutamate dehydrogenase (NADP+) ...  
K01006: pyruvate, orthophosphate dikinase [...]  
K01610: phosphoenolpyruvate carboxykinase...  
K01805: xylose isomerase [EC:5.3.1.5]  
K02358: elongation factor EF-Tu  
K02996: small subunit ribosomal protein S9  
K03046: DNA-directed RNA polymerase sub...  
K10117: raffinose/stachyose/melibiose transp...  
K10200: N-acetylglucosamine transport syst...  
UNGROUPED

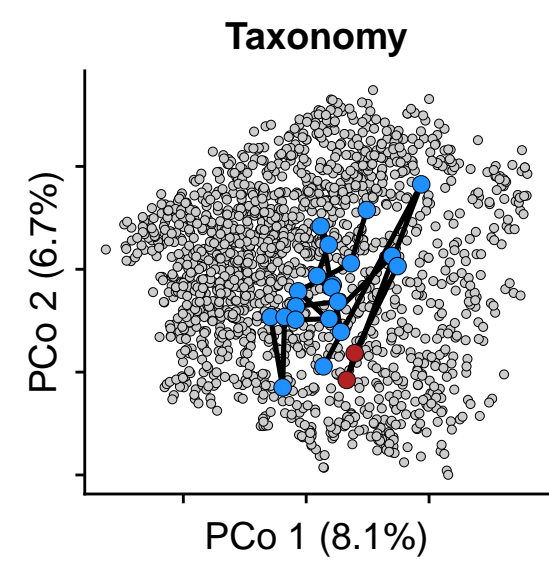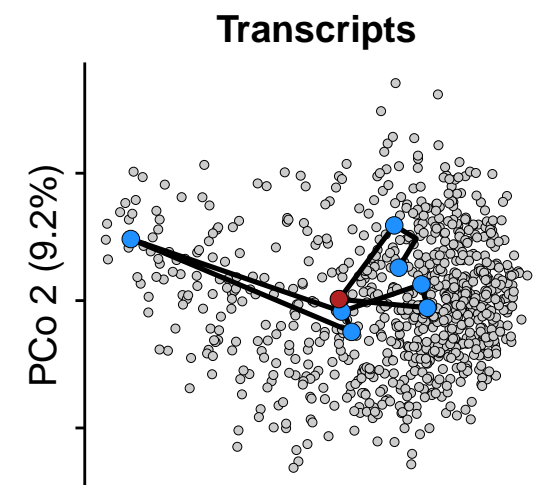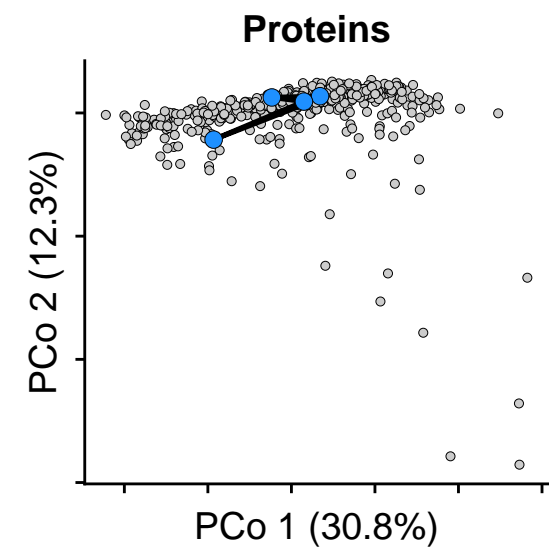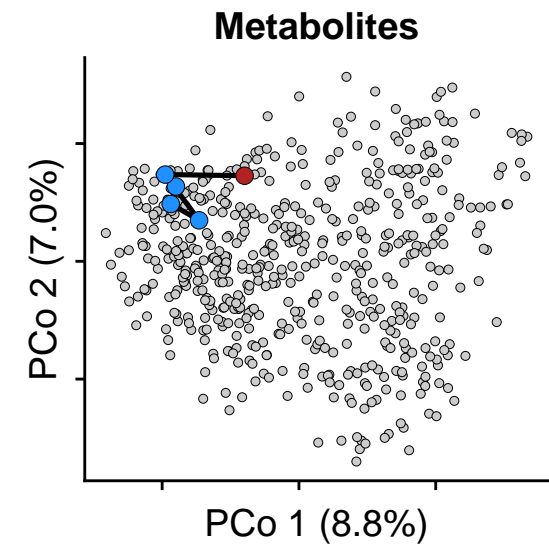

M2068: 19 Female White MGH | CD L1

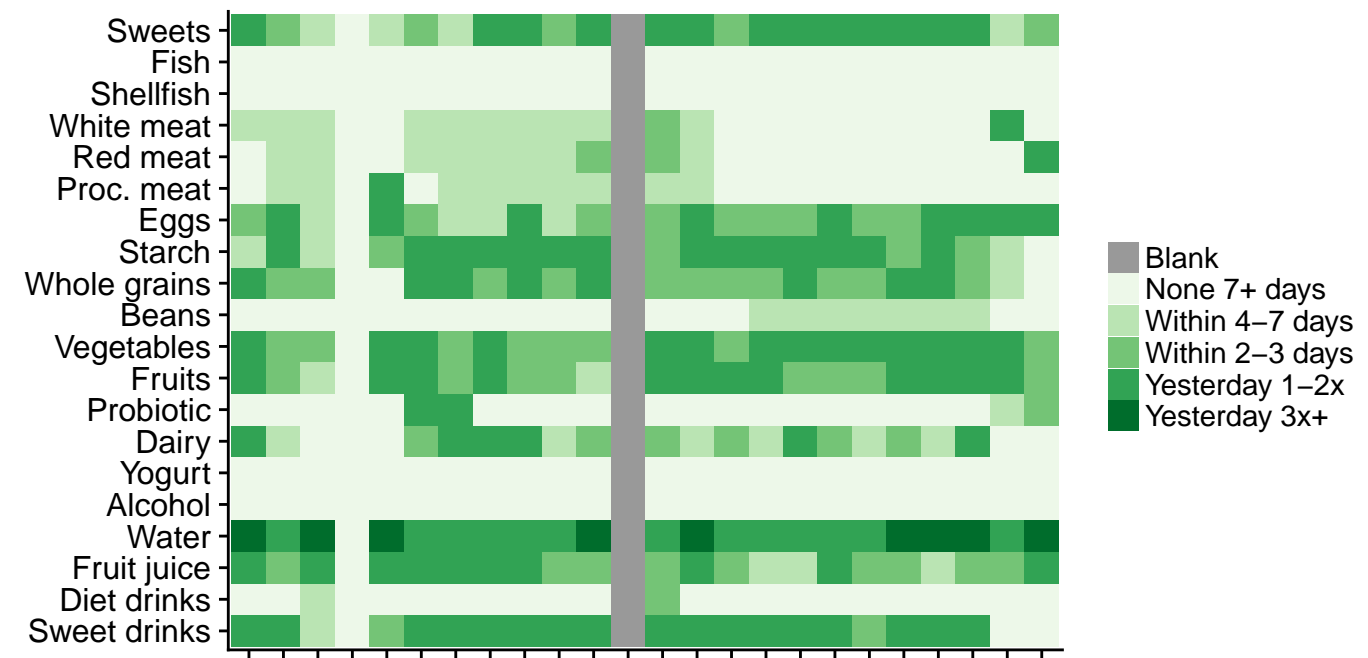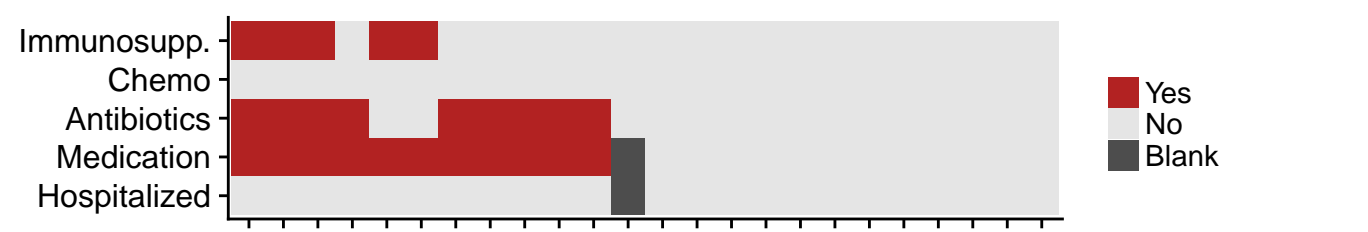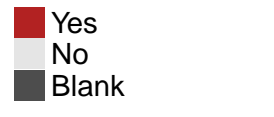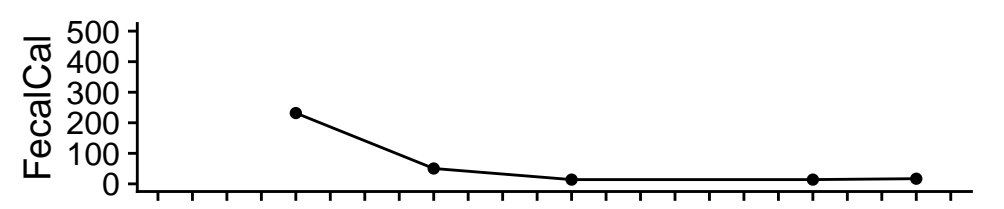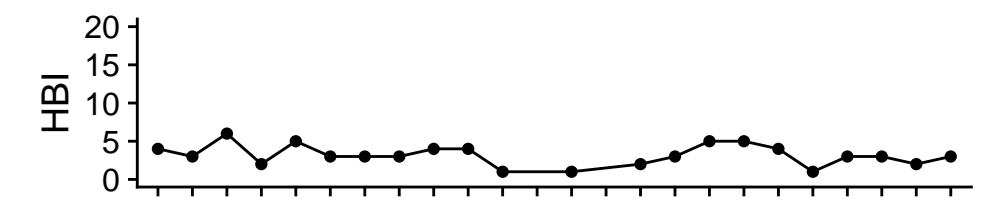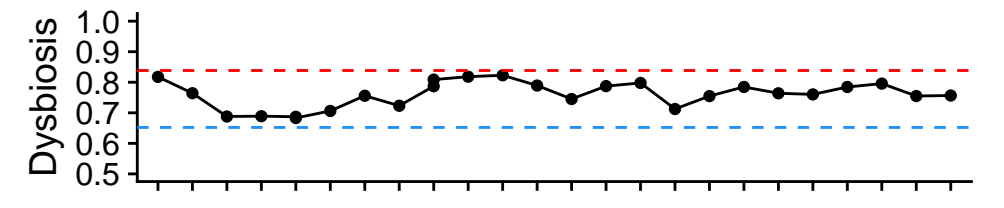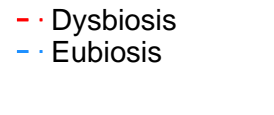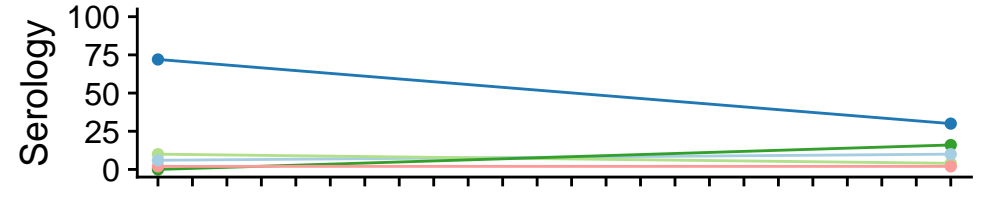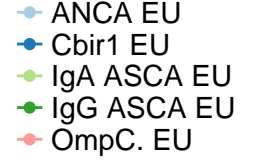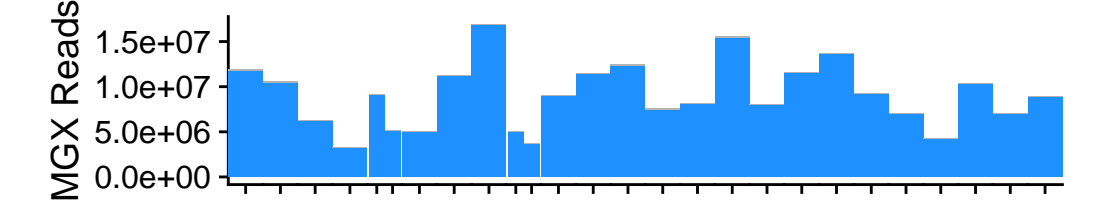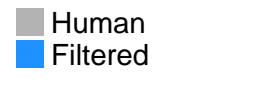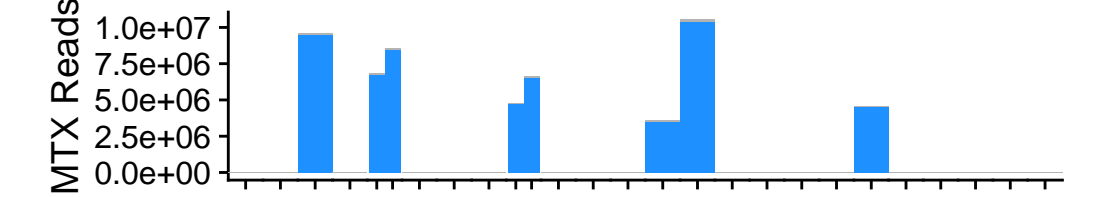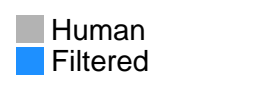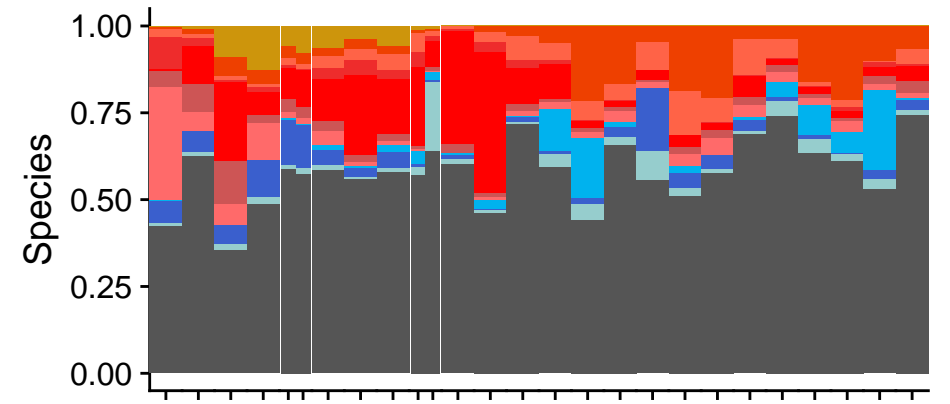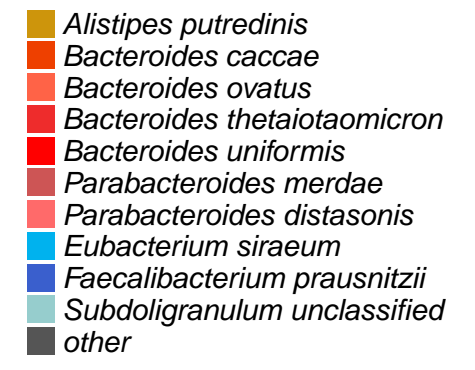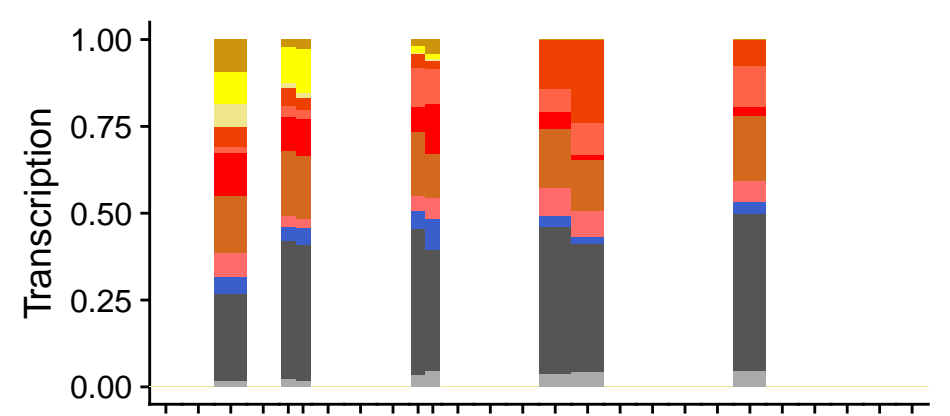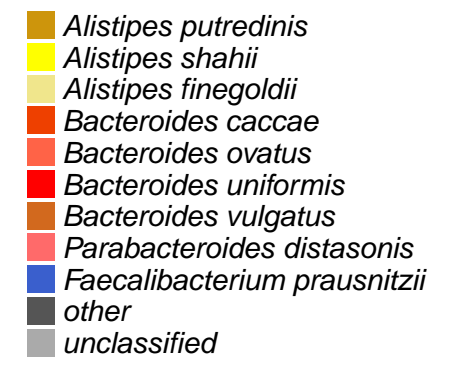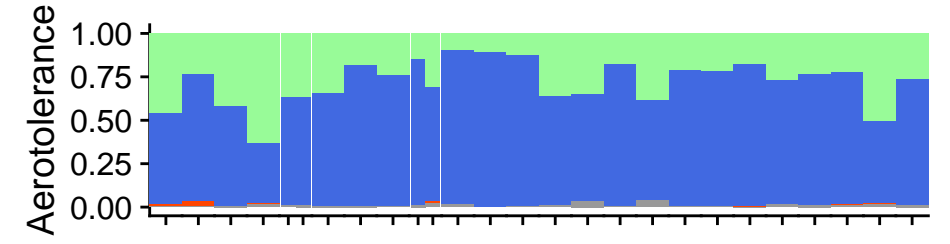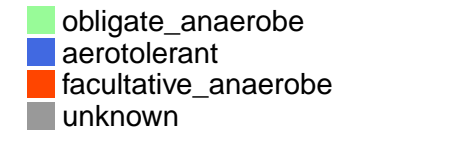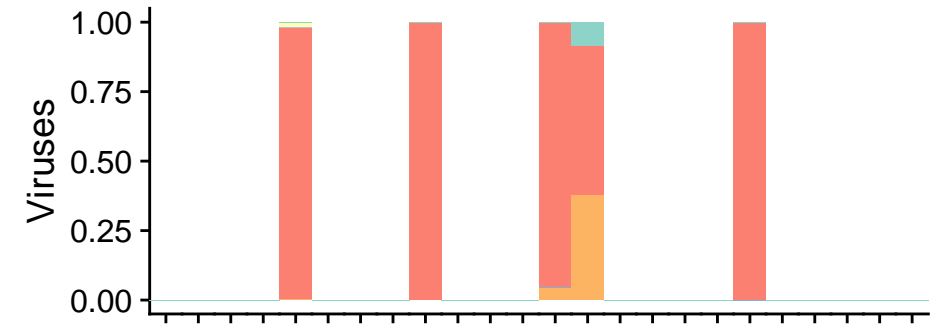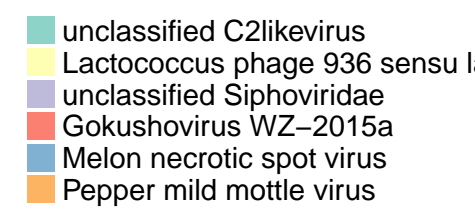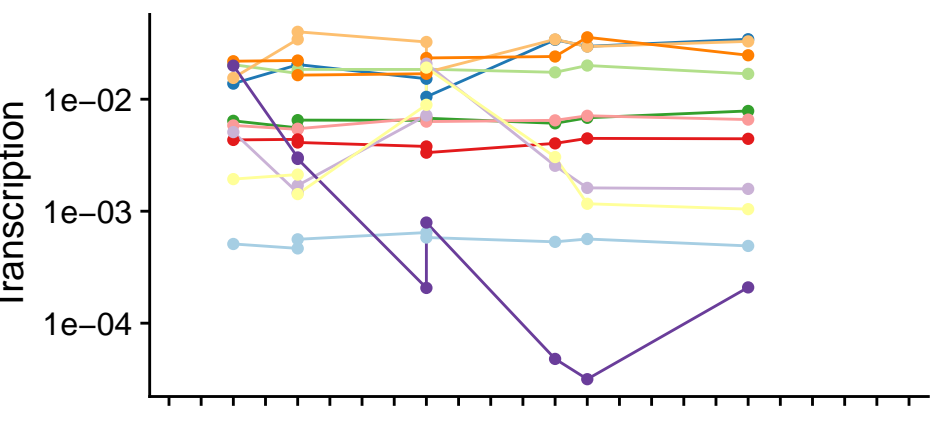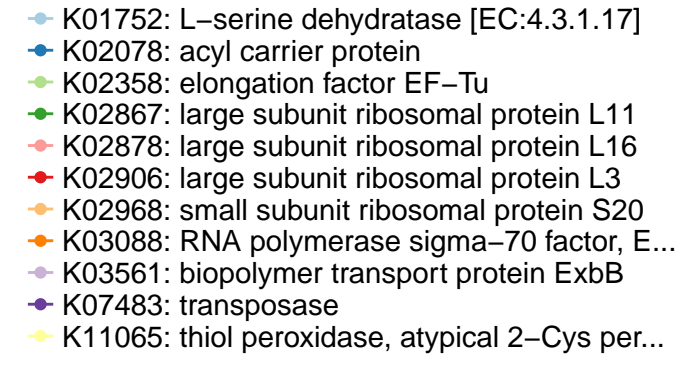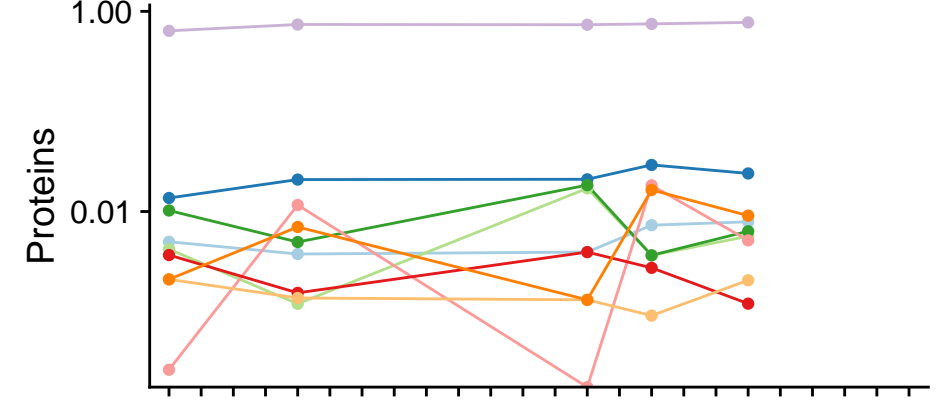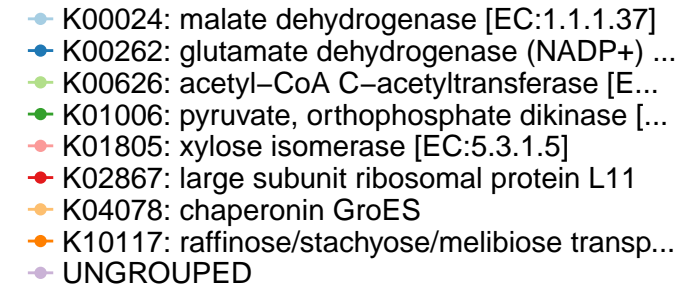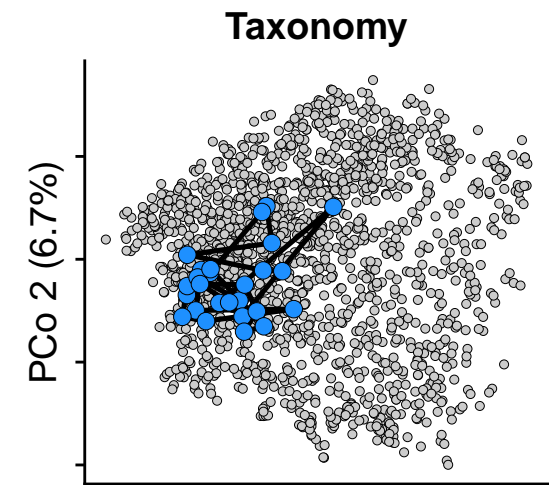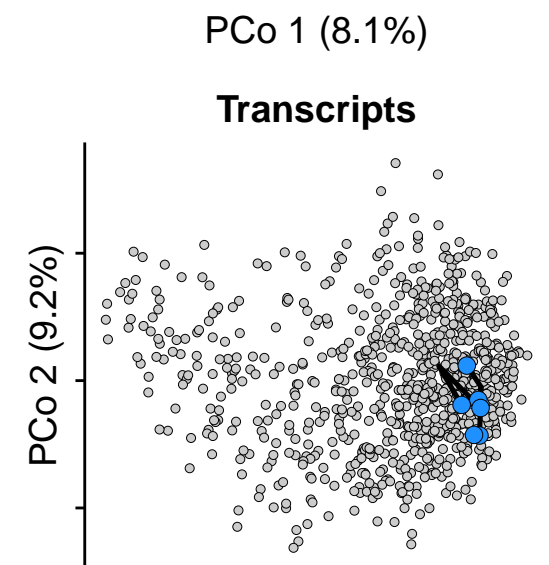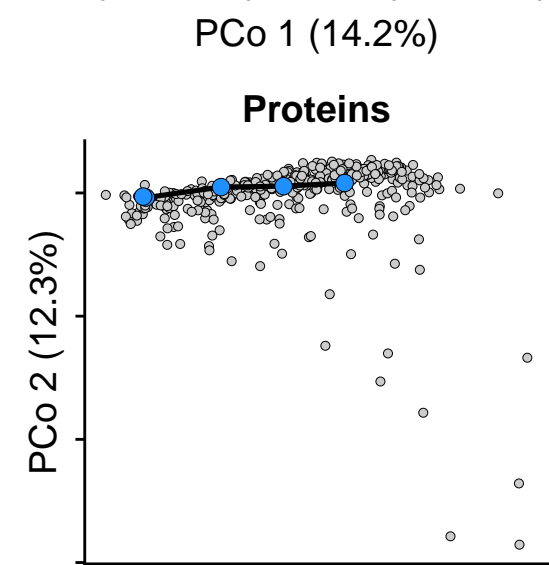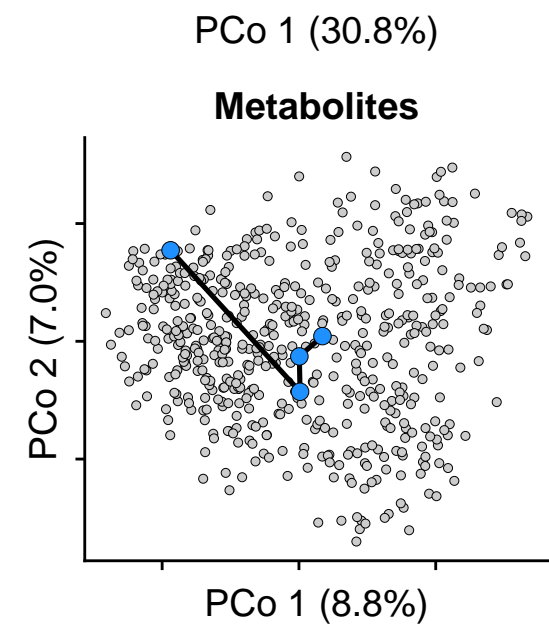

M2069: 29 Female White MGH | UC

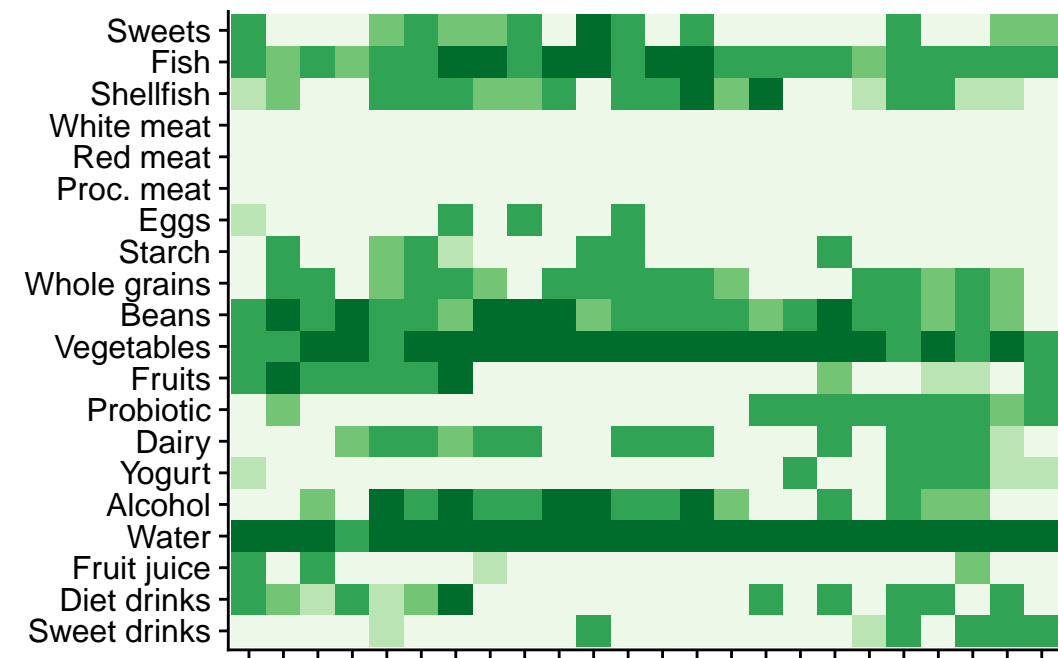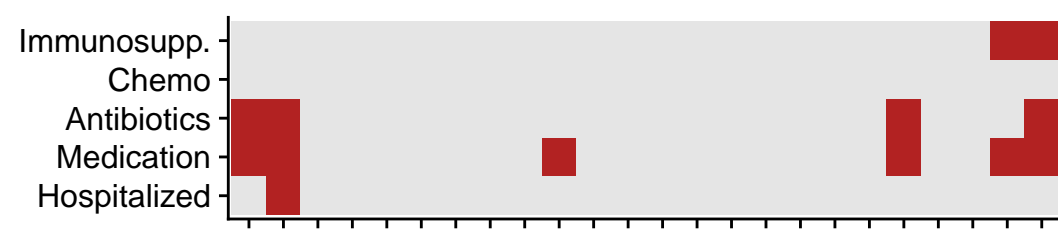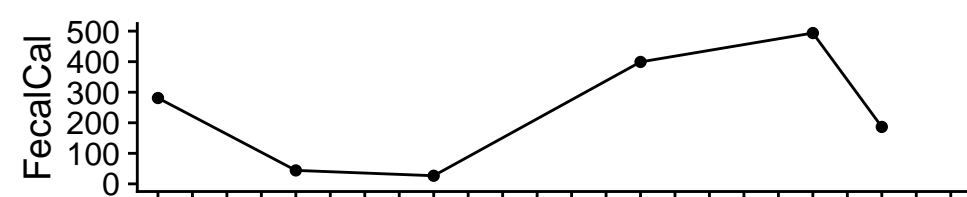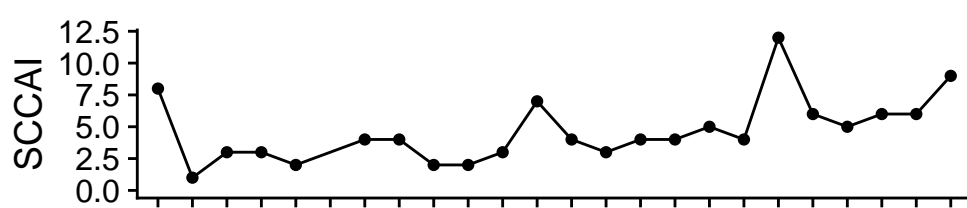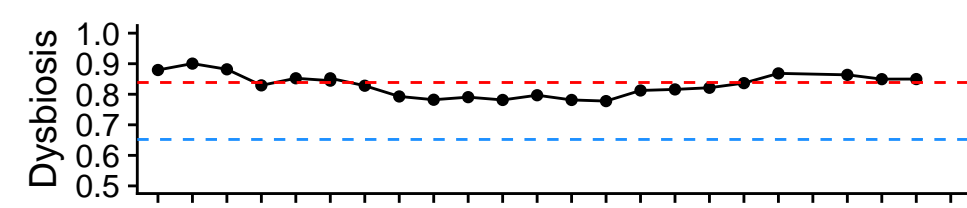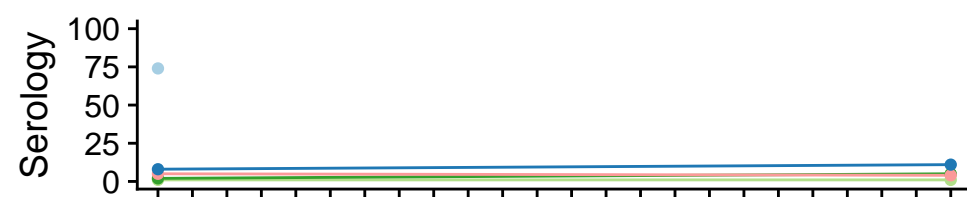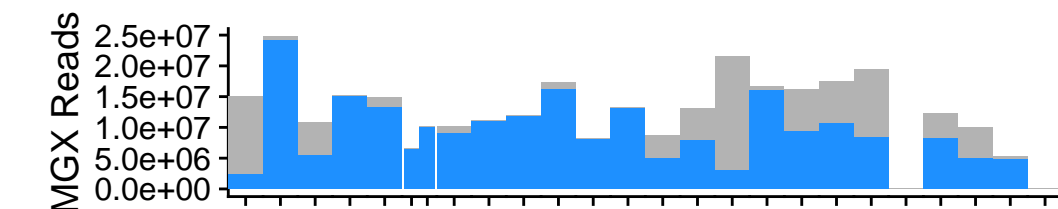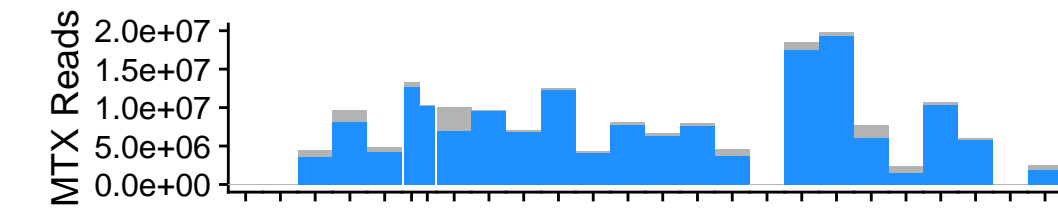

None 7+ days  
Within 4-7 days  
Within 2-3 days  
Yesterday 1-2x  
Yesterday 3x+

Yes  
No

Dysbiosis  
Eubiosis

ANCA EU  
Cbir1 EU  
IgA ASCA EU  
IgG ASCA EU  
OmpC. EU

Human  
Filtered

Human  
Filtered

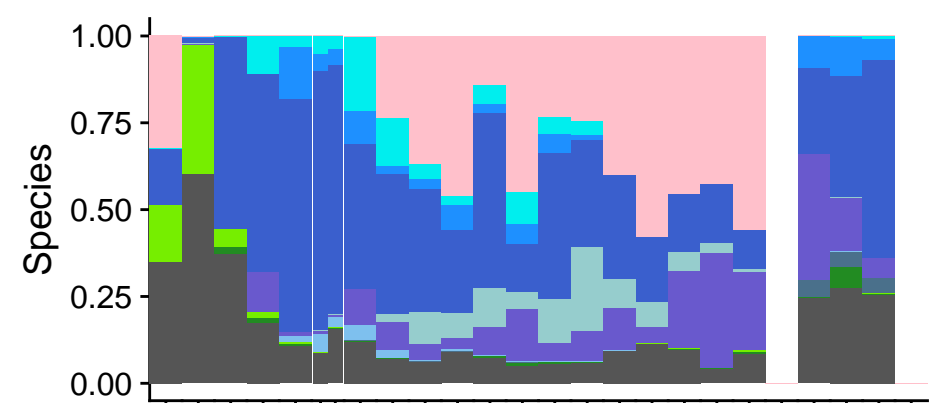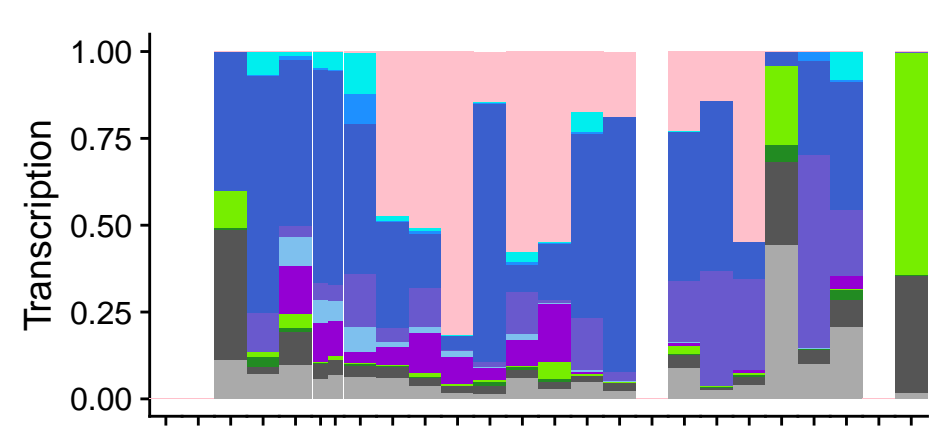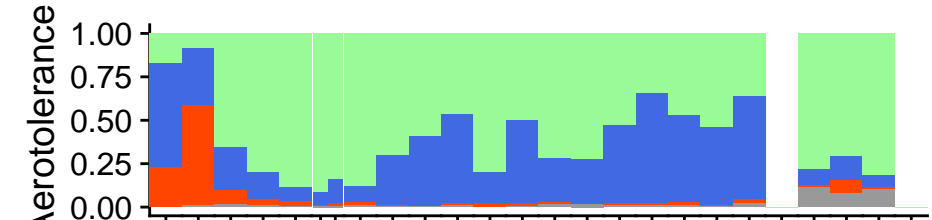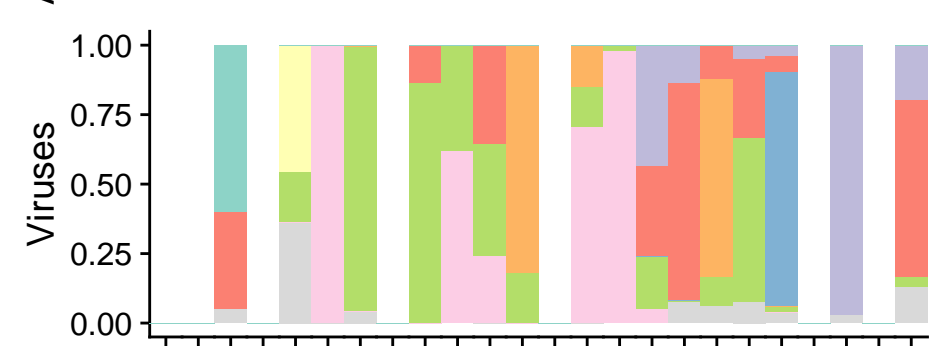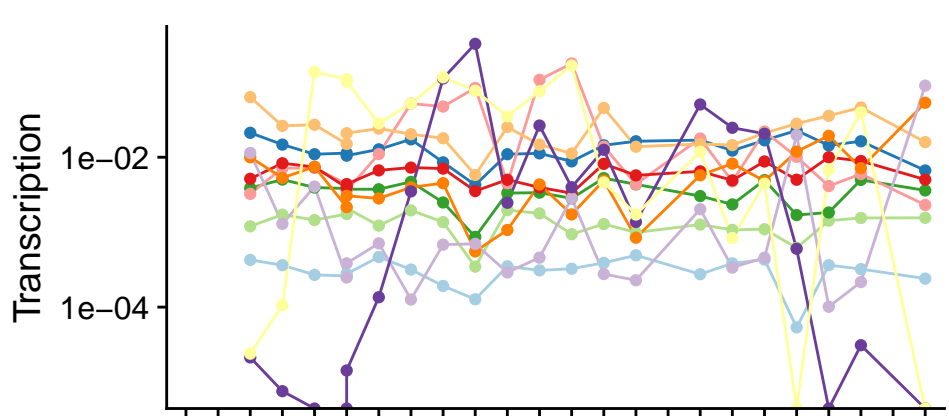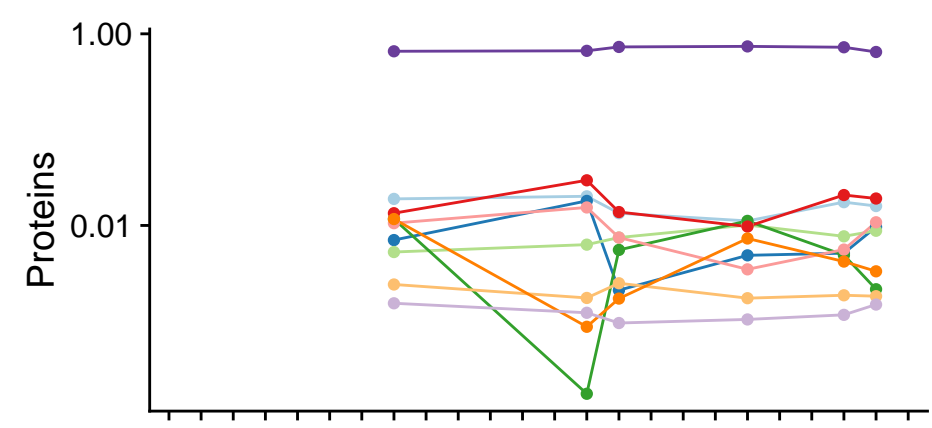

*Bacteroides fragilis*  
*Eubacterium rectale*  
*Eubacterium eligens*  
*Faecalibacterium prausnitzii*  
*Subdoligranulum unclassified*  
*Roseburia intestinalis*  
*Roseburia hominis*  
*Roseburia inulinivorans*  
*Escherichia coli*  
*Haemophilus parainfluenzae*  
other

*Bacteroides fragilis*  
*Eubacterium rectale*  
*Eubacterium eligens*  
*Faecalibacterium prausnitzii*  
*Roseburia intestinalis*  
*Roseburia hominis*  
*Ruminococcus obeum*  
*Escherichia coli*  
*Haemophilus parainfluenzae*  
other  
unclassified

obligate\_anaerobe  
aerotolerant  
facultative\_anaerobe  
unknown

Enterococcus phage EFDG1  
T7virus  
Streptococcus phage Sfi21  
Streptococcus phage YMC-2011  
Bell pepper mottle virus  
Cucumber green mottle mosaic virus  
Pepper mild mottle virus  
Tomato mosaic virus  
other

K00789: S-adenosylmethionine synthetase [...]  
K02358: elongation factor EF-Tu  
K02838: ribosome recycling factor  
K02863: large subunit ribosomal protein L1  
K02909: large subunit ribosomal protein L31  
K02956: small subunit ribosomal protein S15  
K02970: small subunit ribosomal protein S21  
K03704: cold shock protein (beta-ribbon, Cs...  
K06078: murein lipoprotein lipoprotein  
K13993: HSP20 family protein  
K19157: NO\_NAME

K00262: glutamate dehydrogenase (NADP+) ...  
K01006: pyruvate, orthophosphate dikinase [...]  
K01610: phosphoenolpyruvate carboxykinase...  
K01805: xylose isomerase [EC:5.3.1.5]  
K02355: elongation factor EF-G  
K02358: elongation factor EF-Tu  
K02994: small subunit ribosomal protein S8  
K10117: raffinose/stachyose/melibiose transp...  
K15633: 2,3-bisphosphoglycerate-independ...  
UNGROUPED

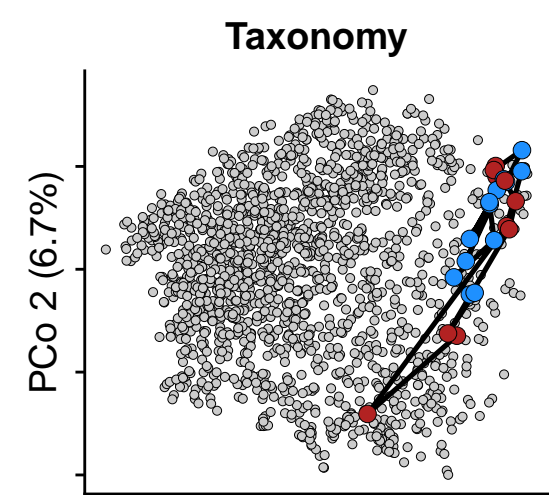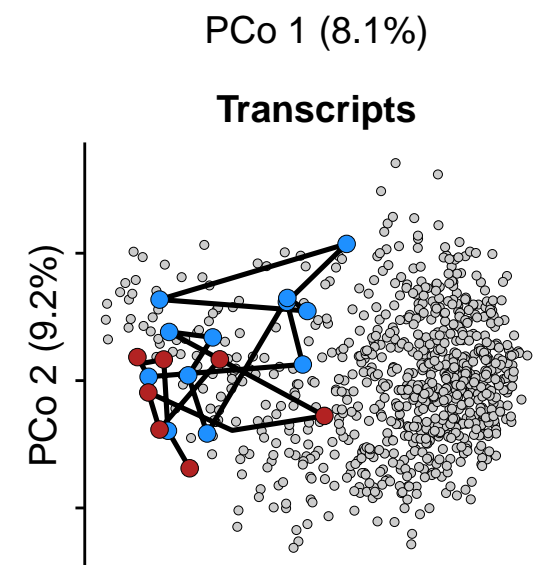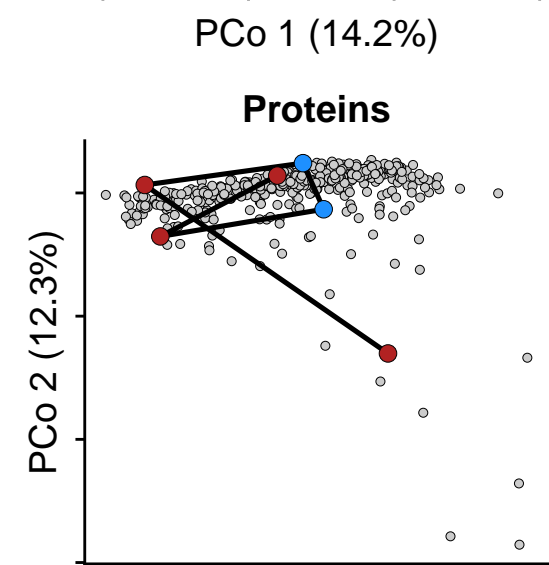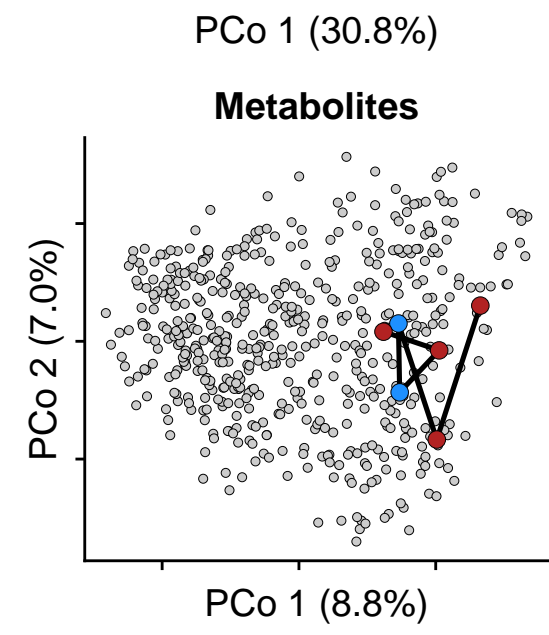

# M2071: 26 Female White MGH | UC

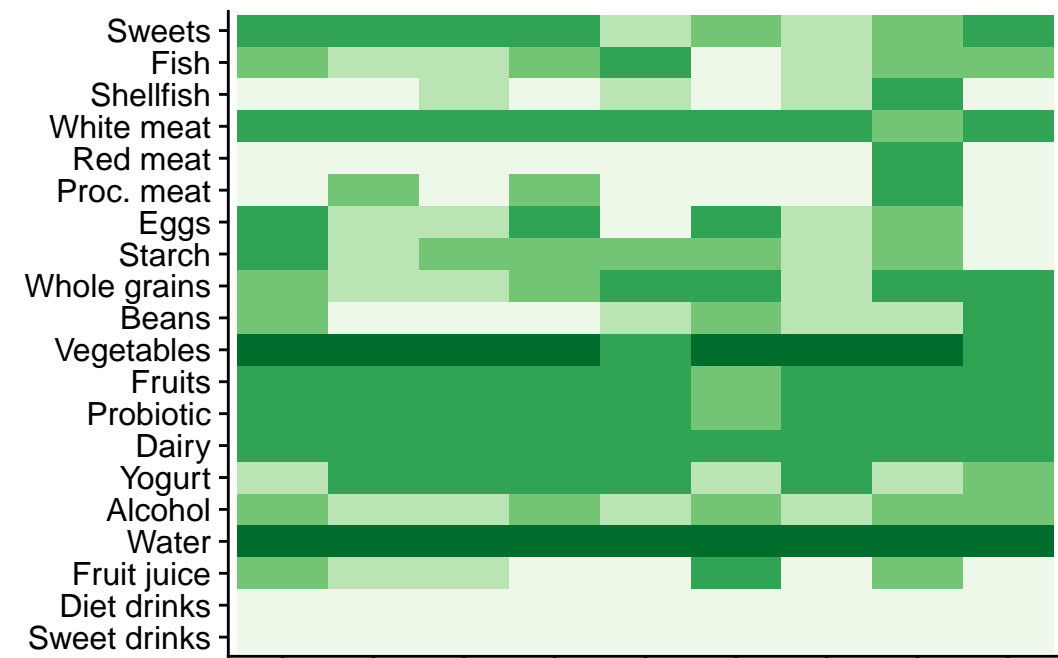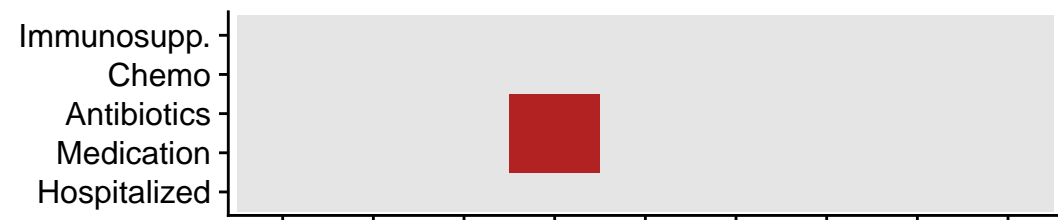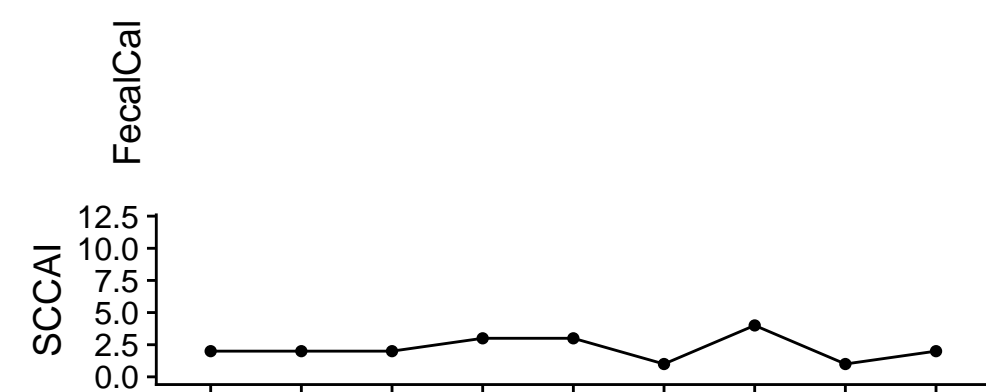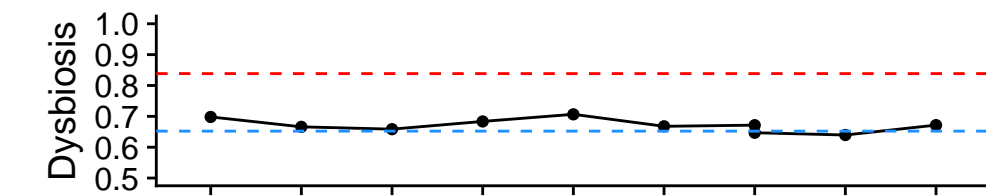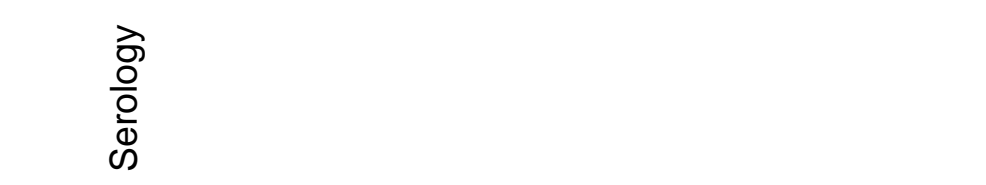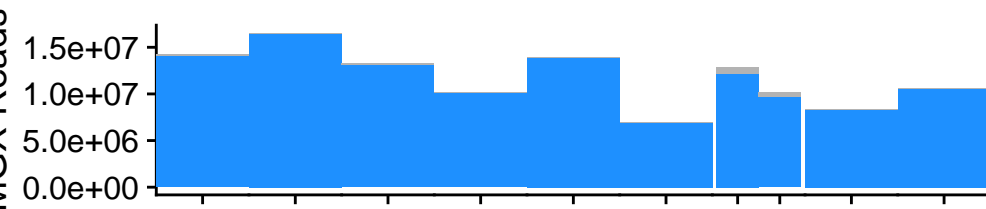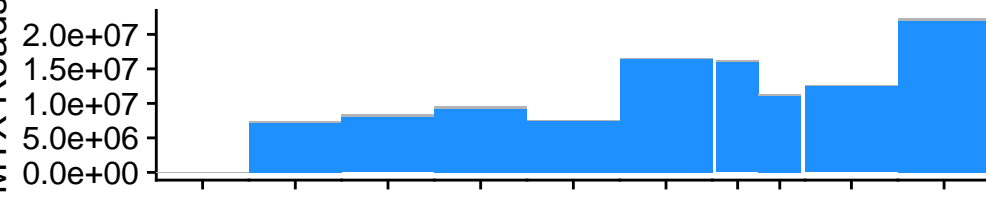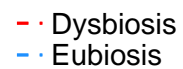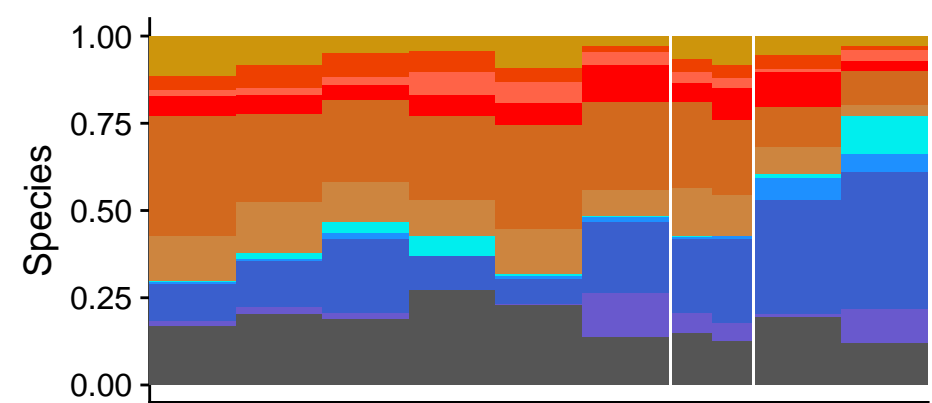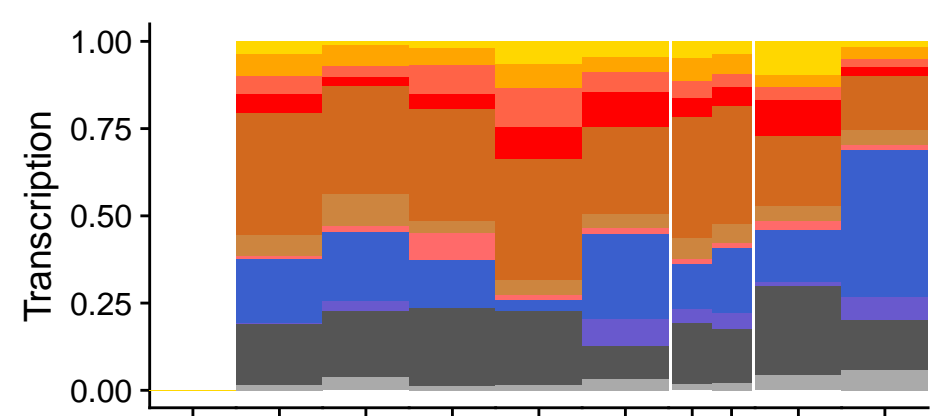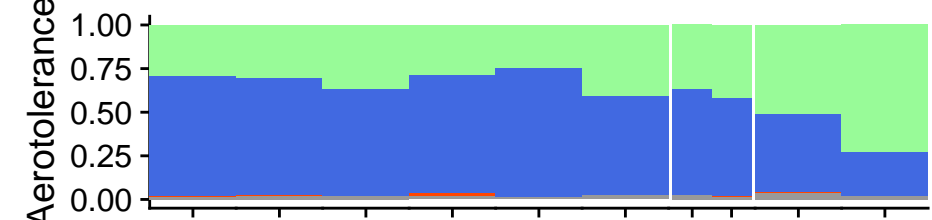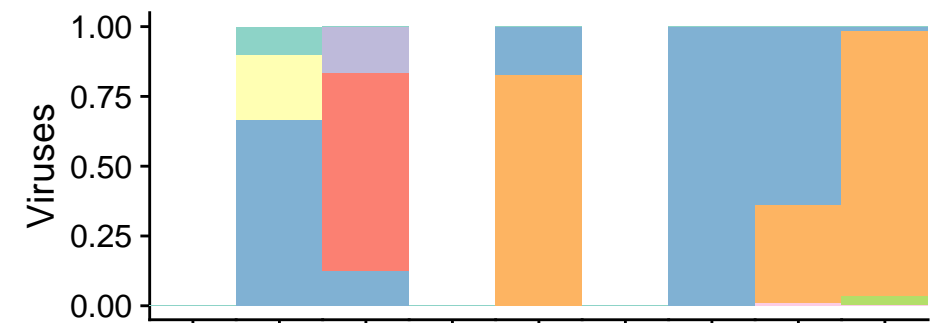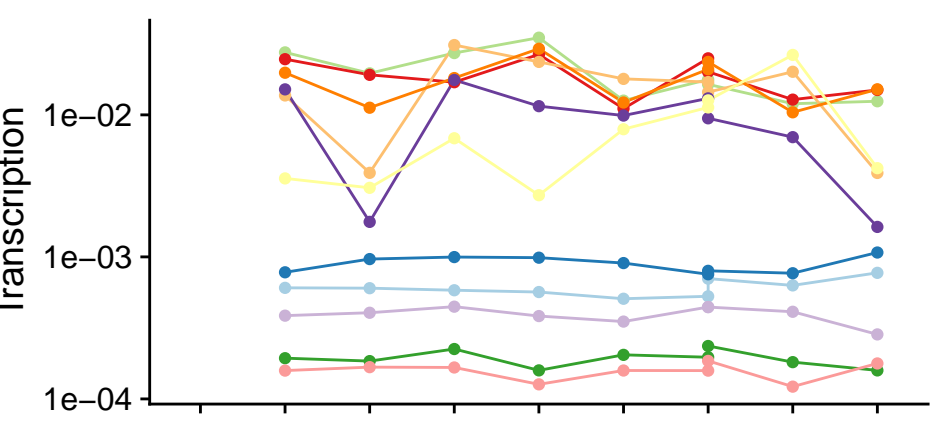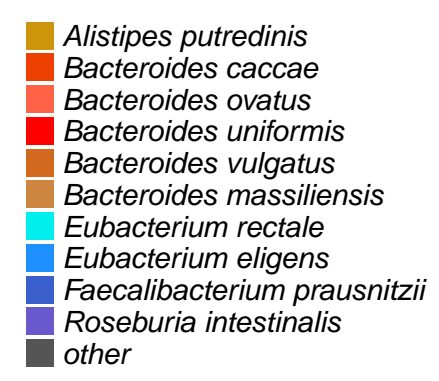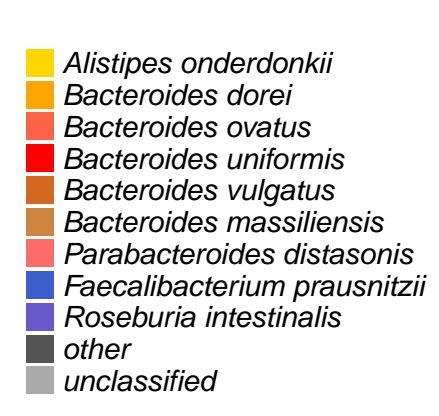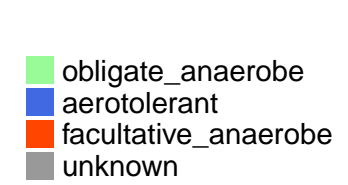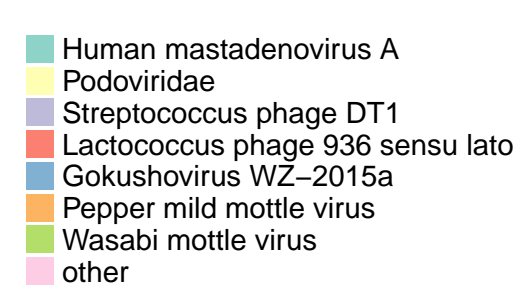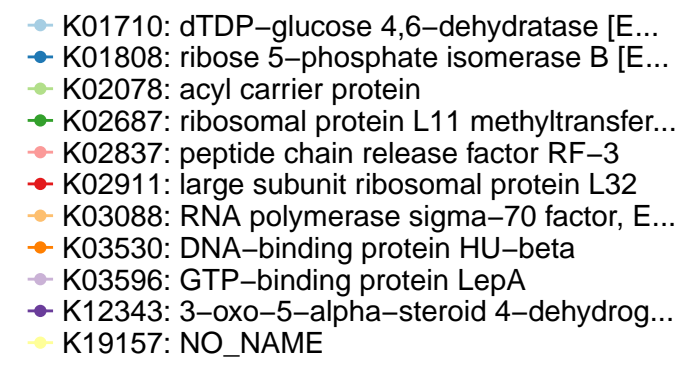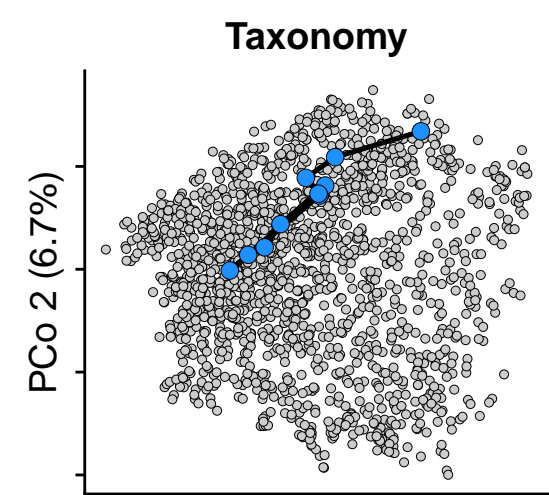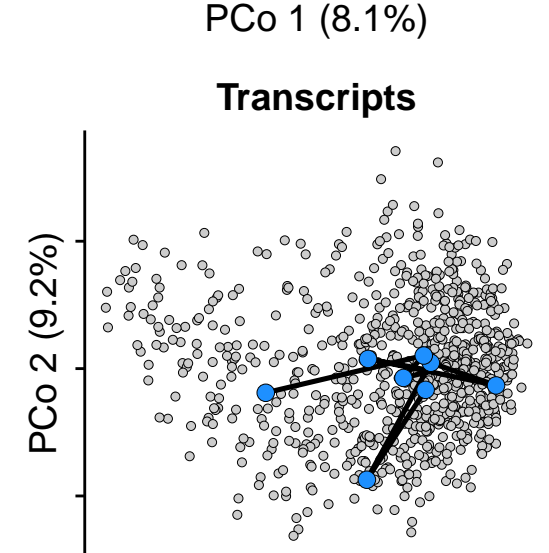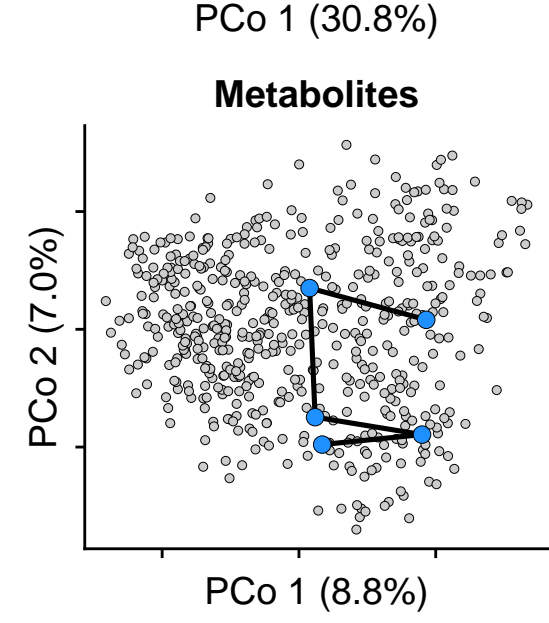

M2072: 51 Male White MGH | nonIBD

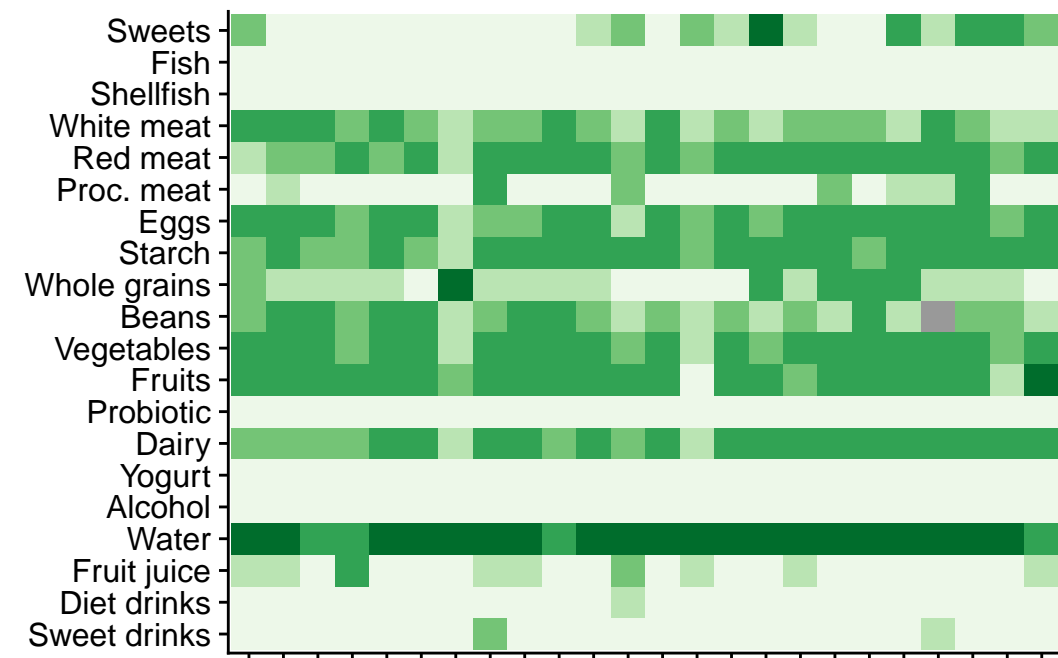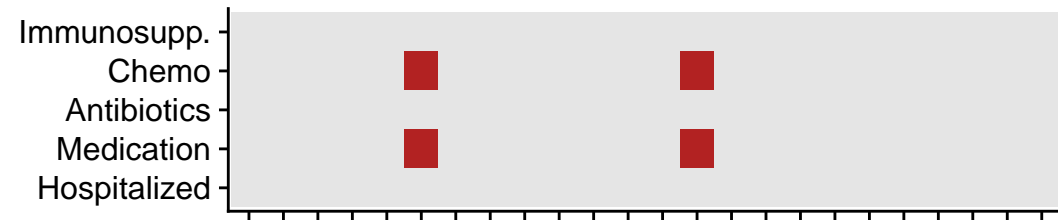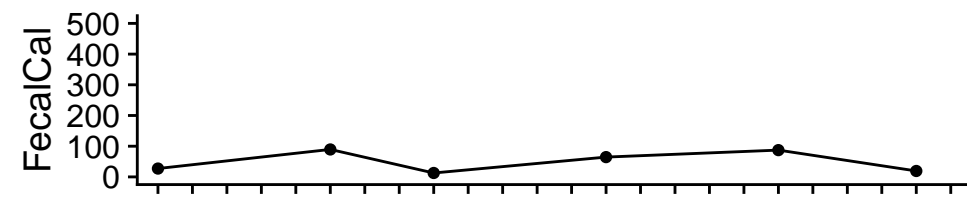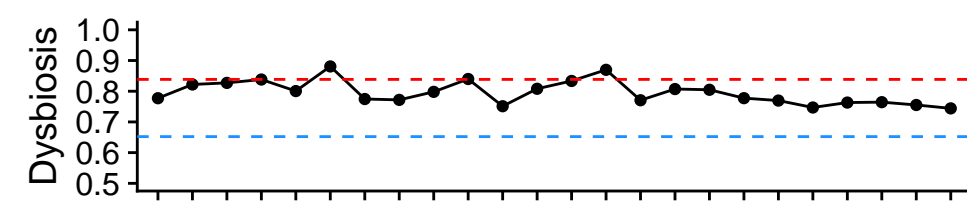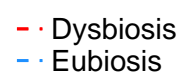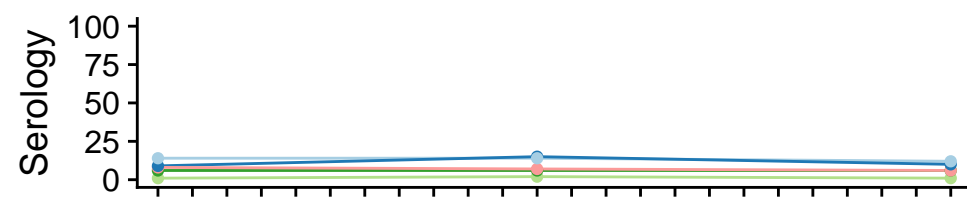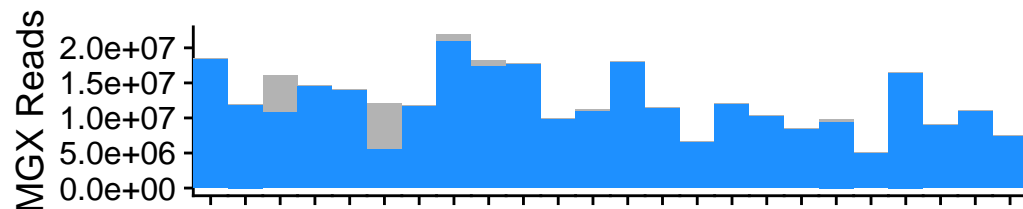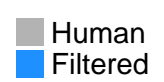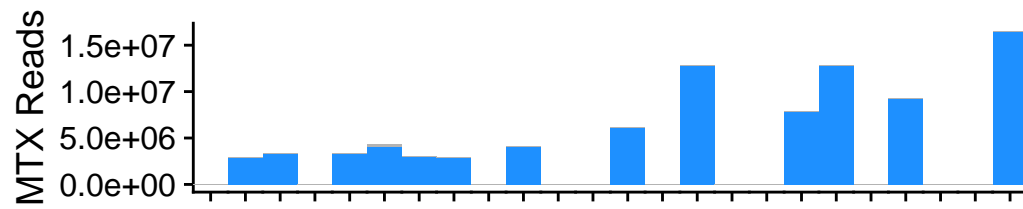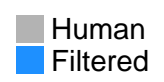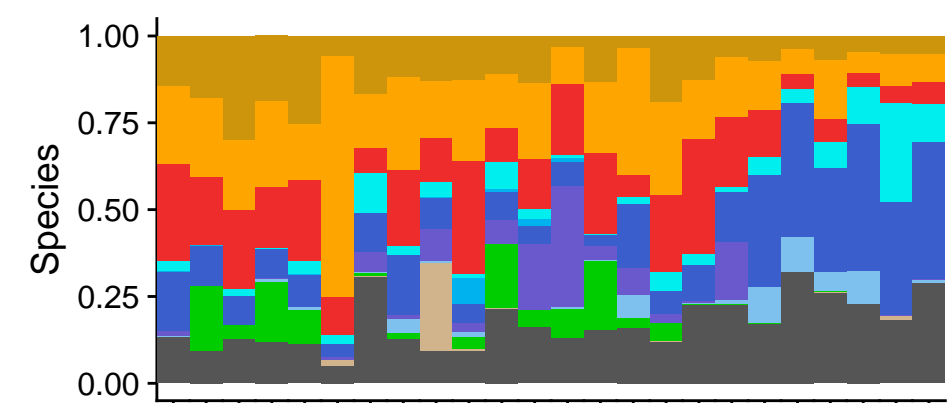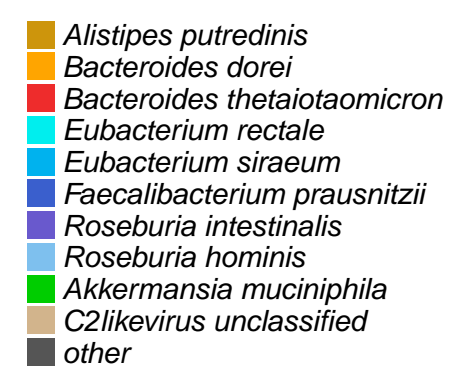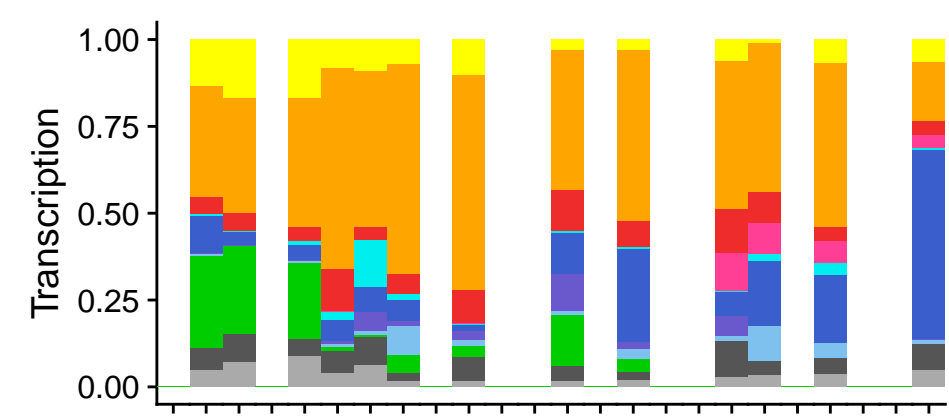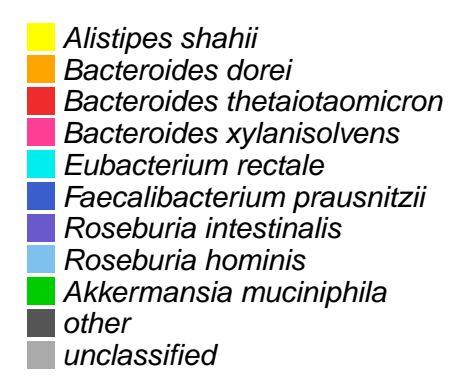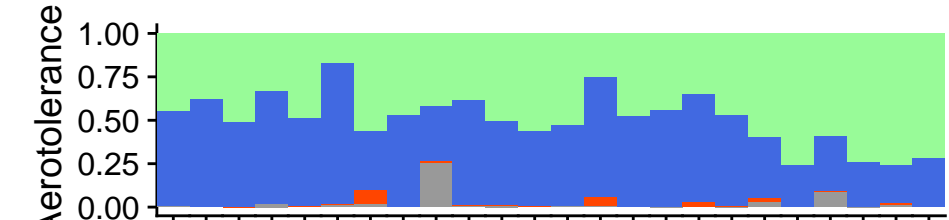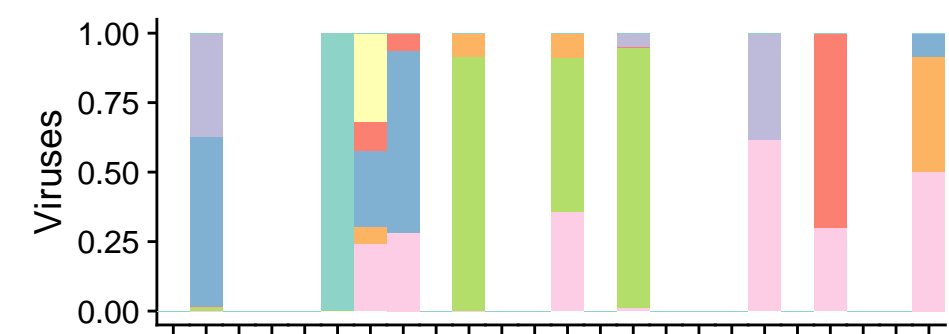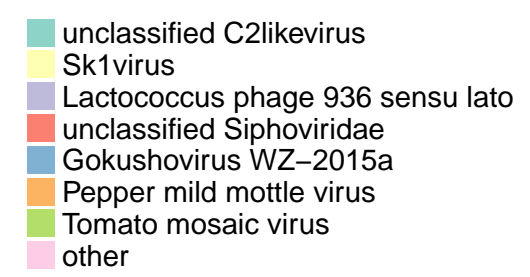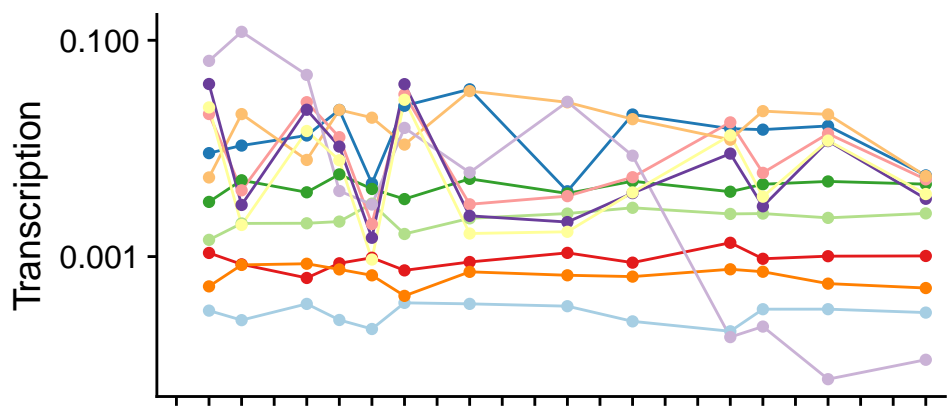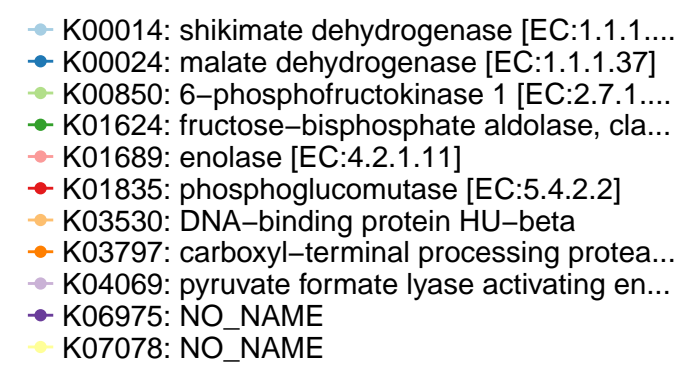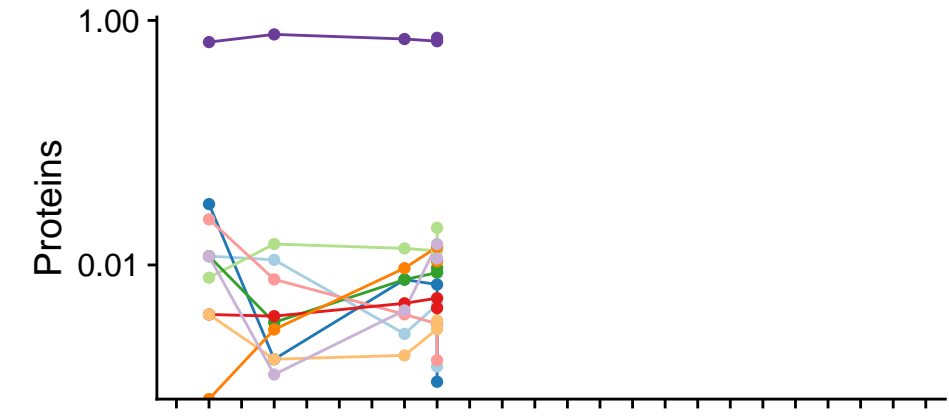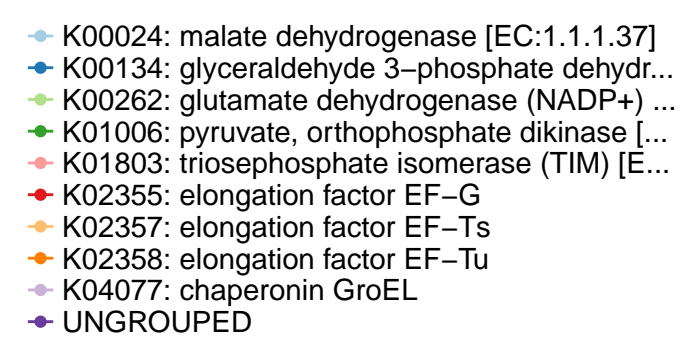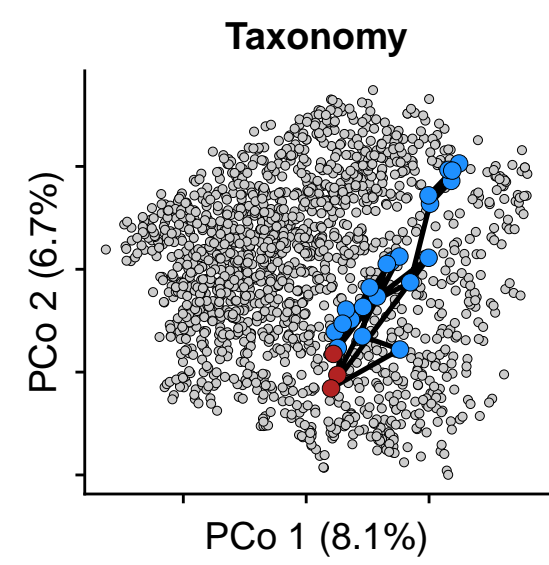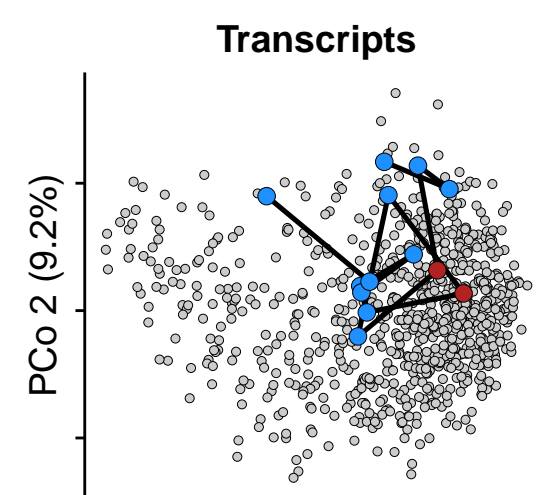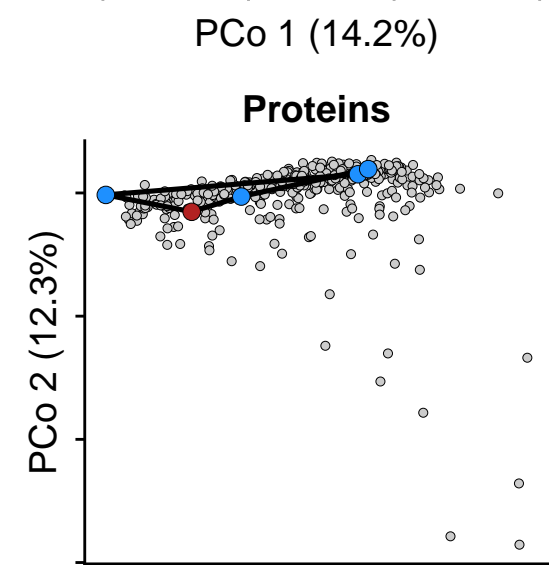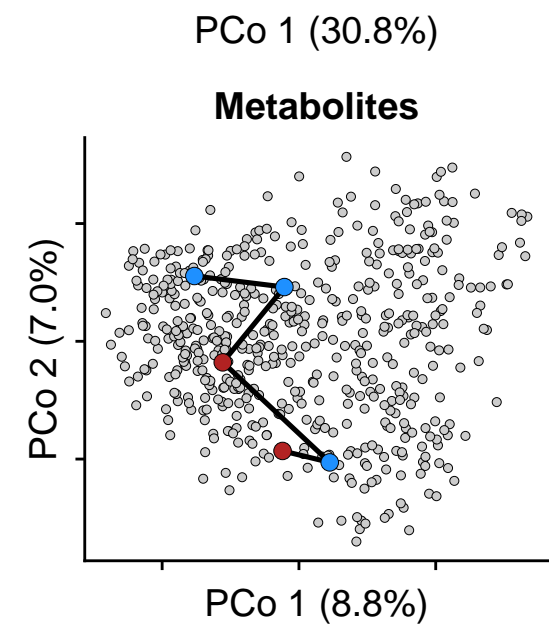



M2075: 61 Male White MGH | nonIBD

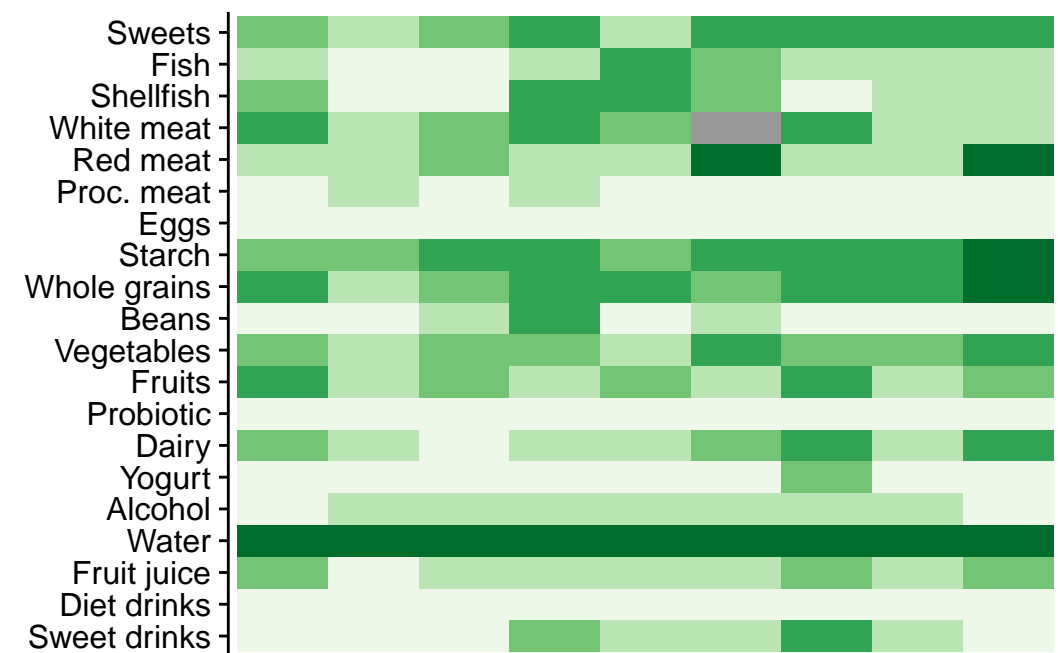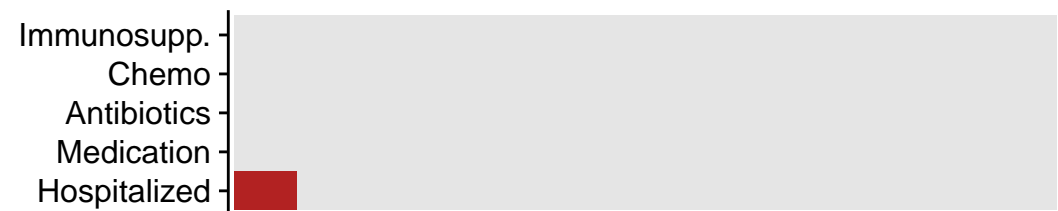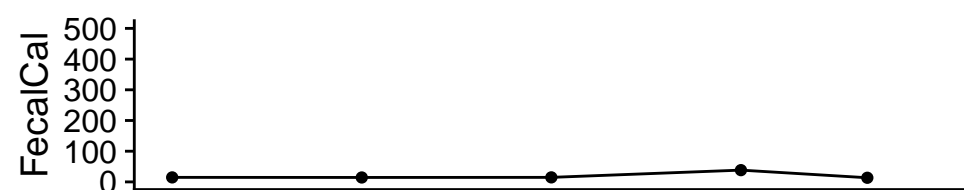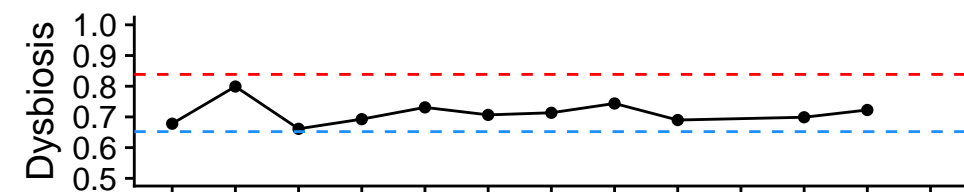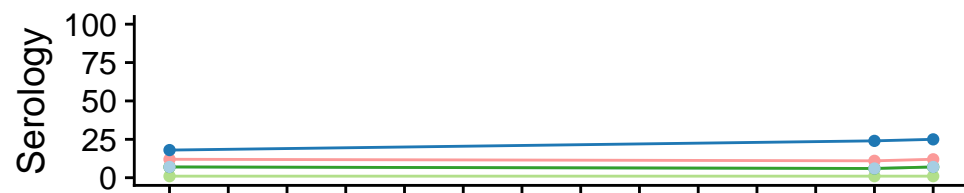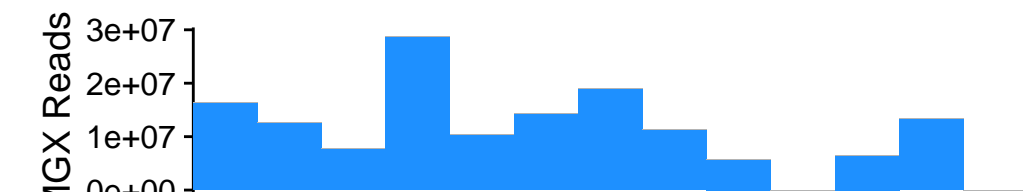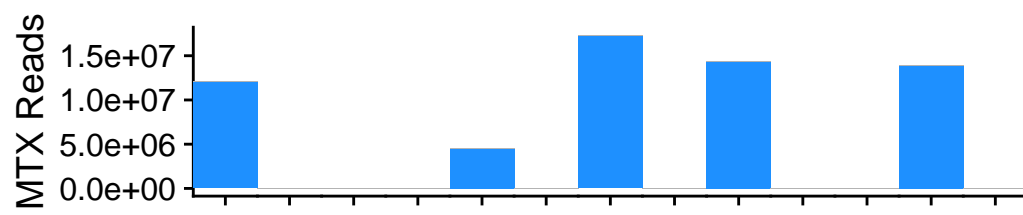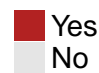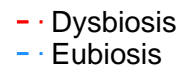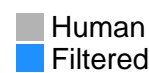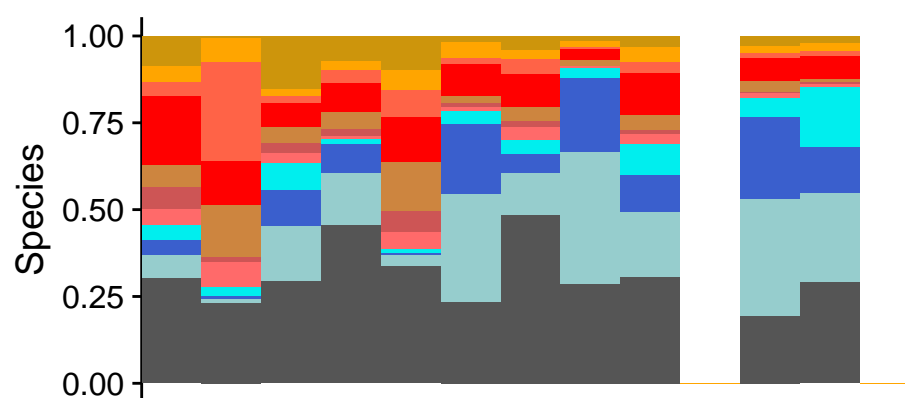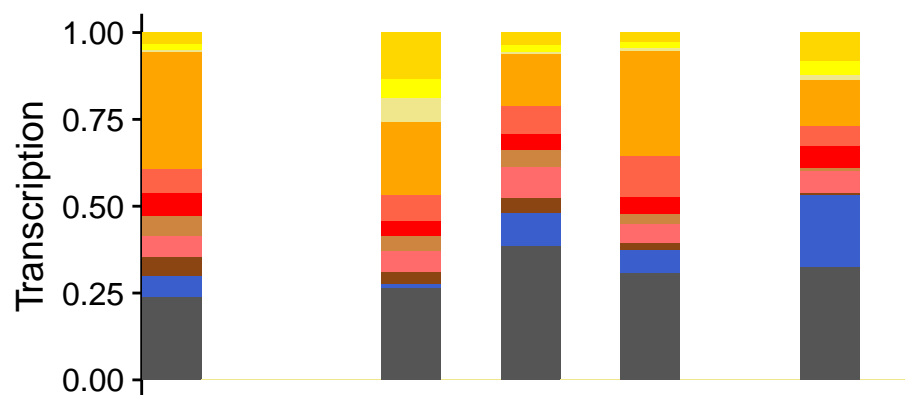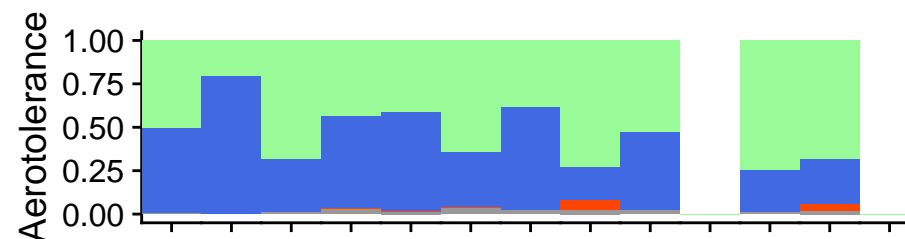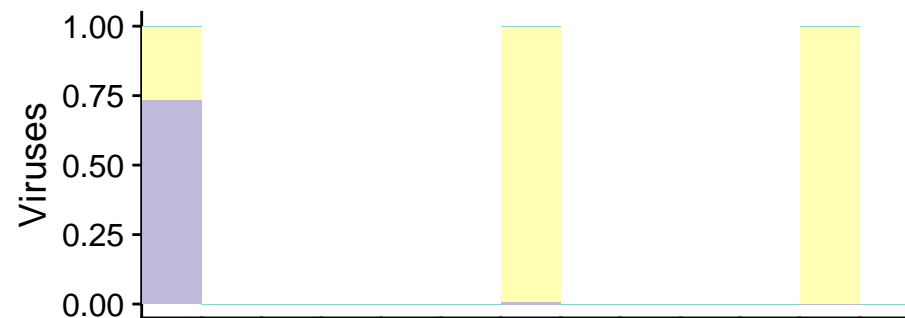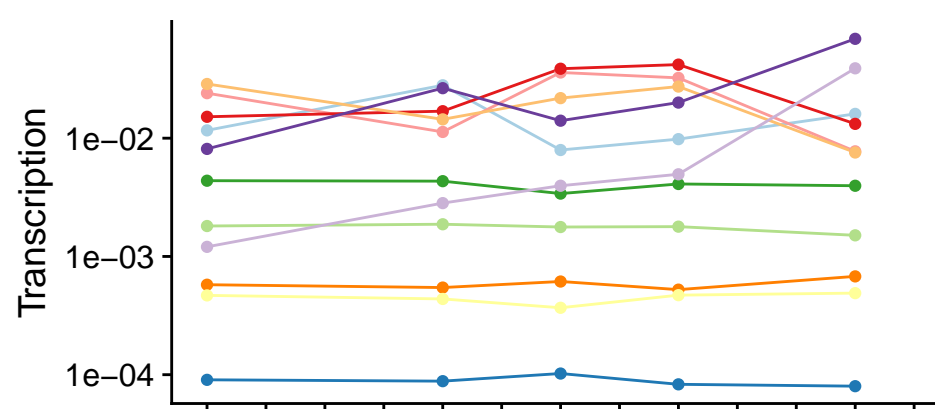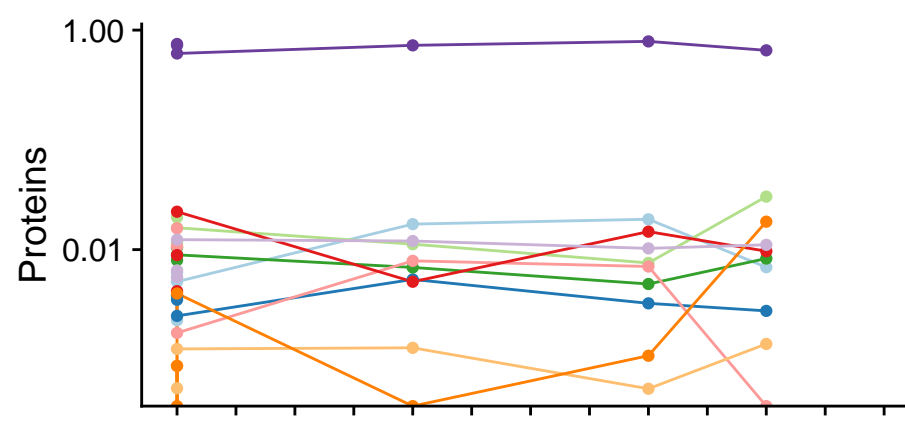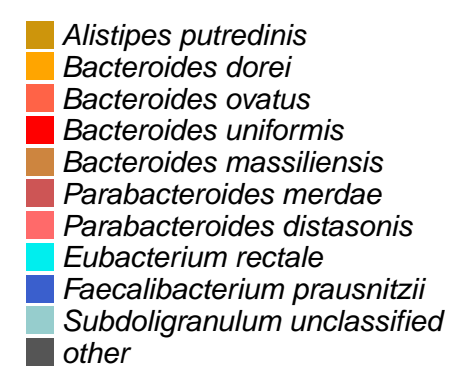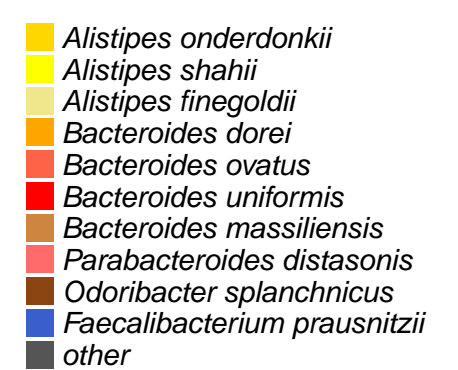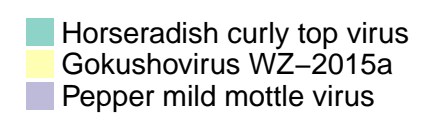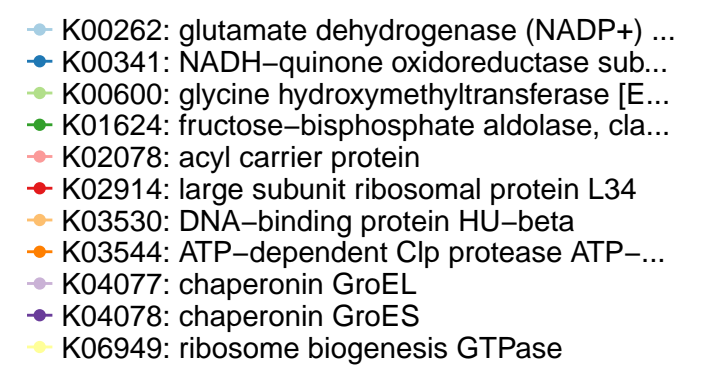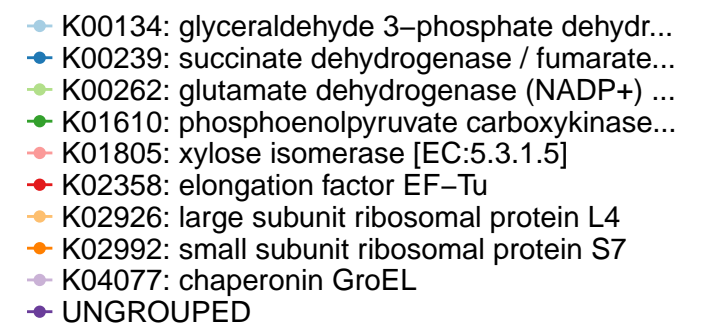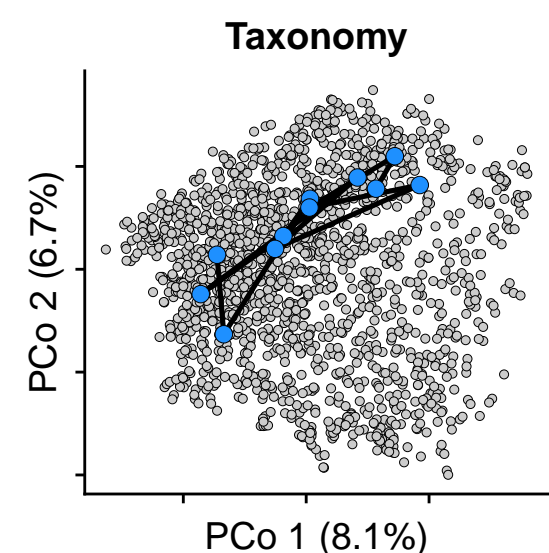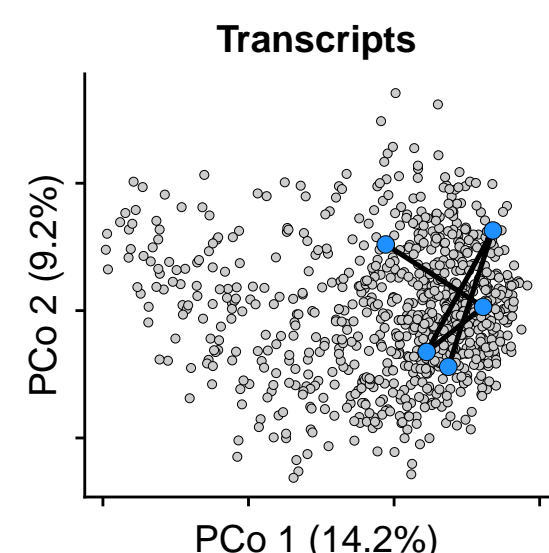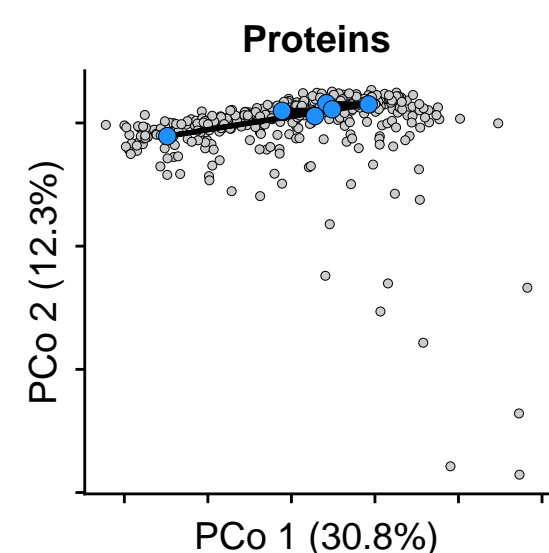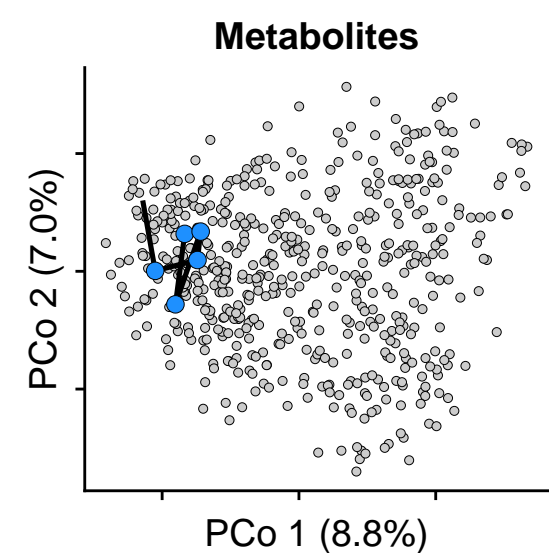

M2077: 32 Female White MGH | nonIBD

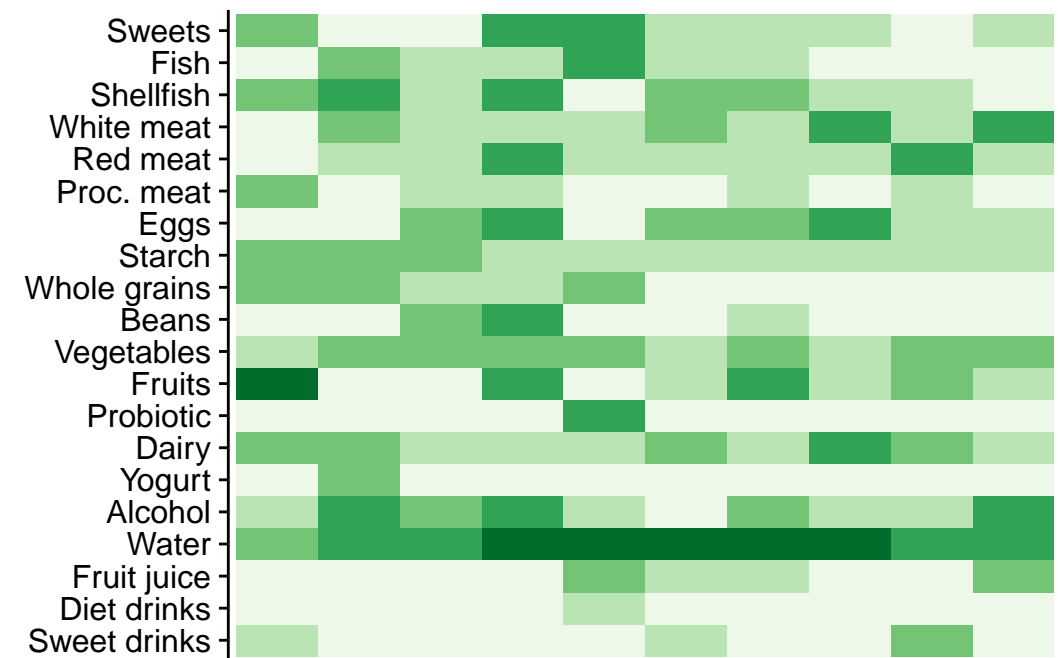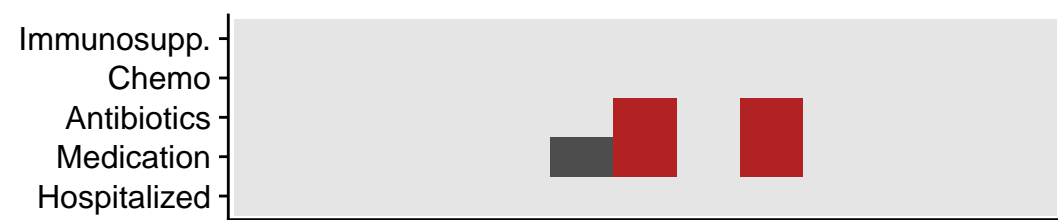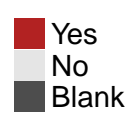

FecalCal

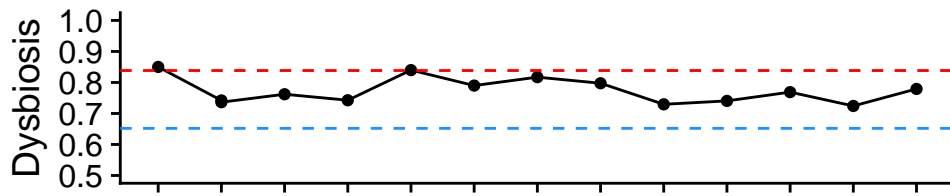

Serology

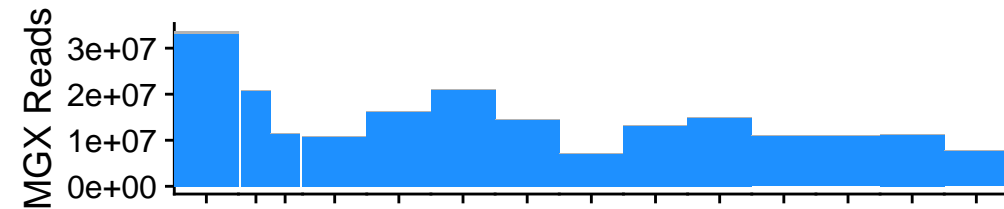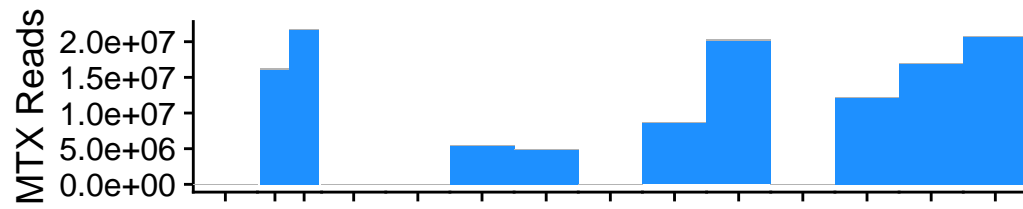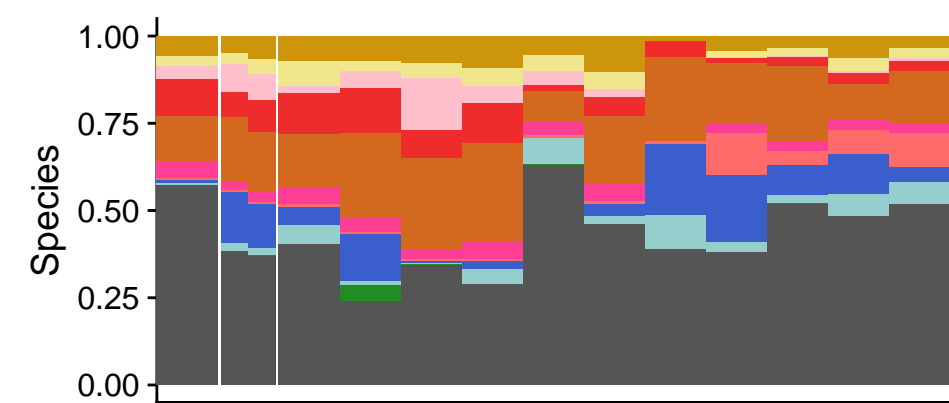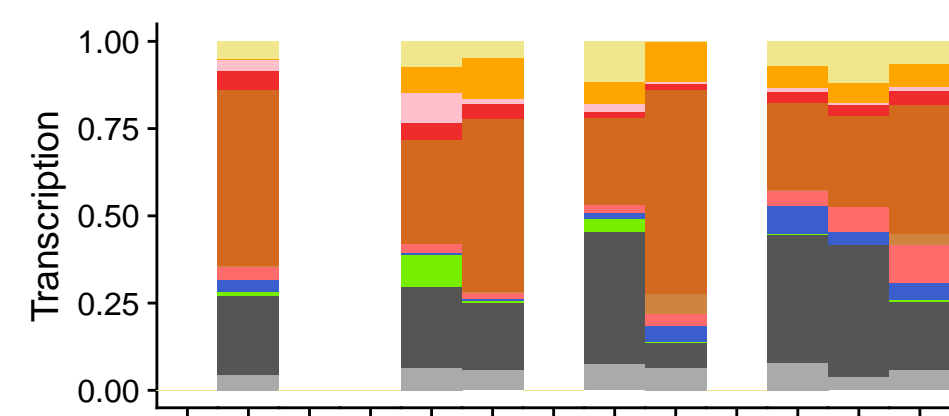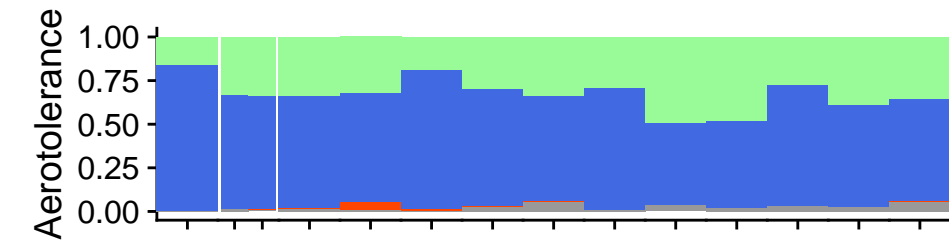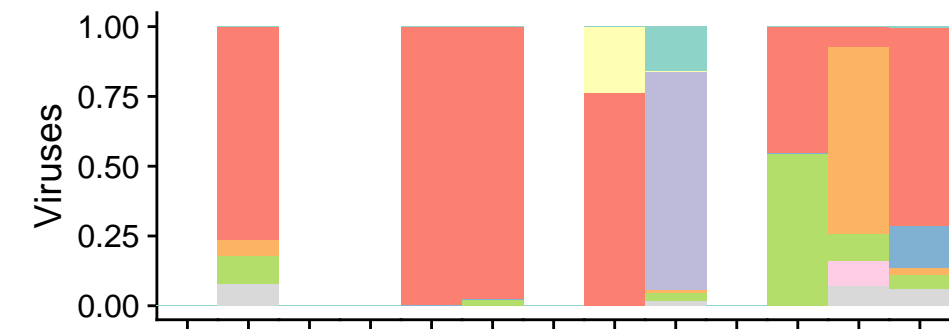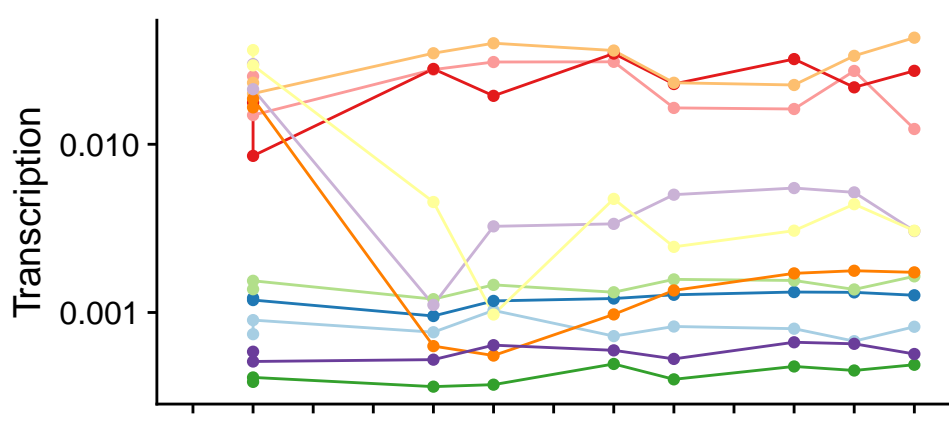

Taxonomy

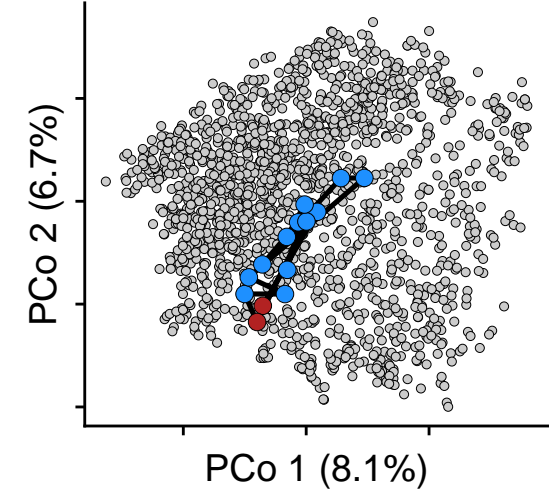

Transcripts

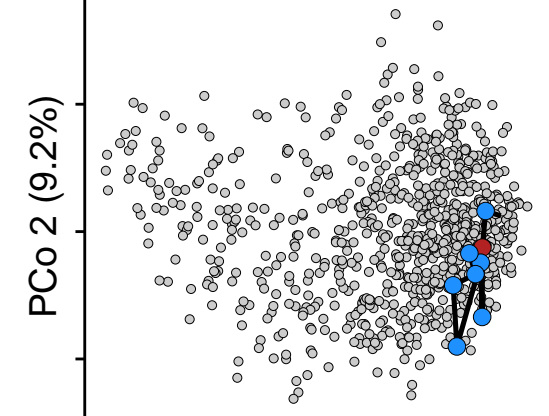

Proteins

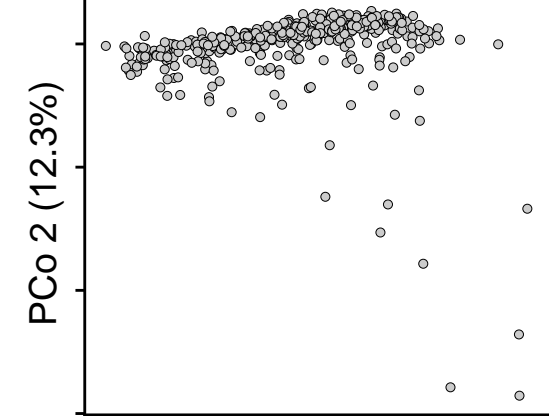

Metabolites

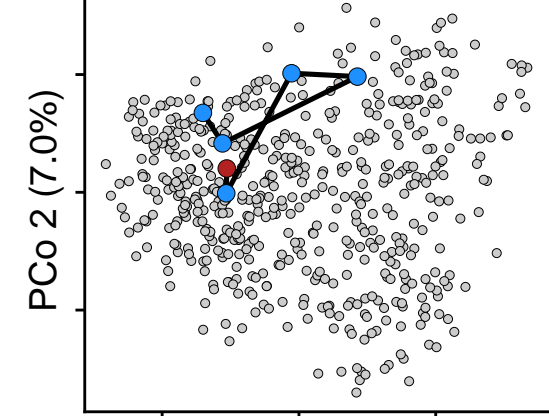

M2079: 29 Male White MGH | nonIBD

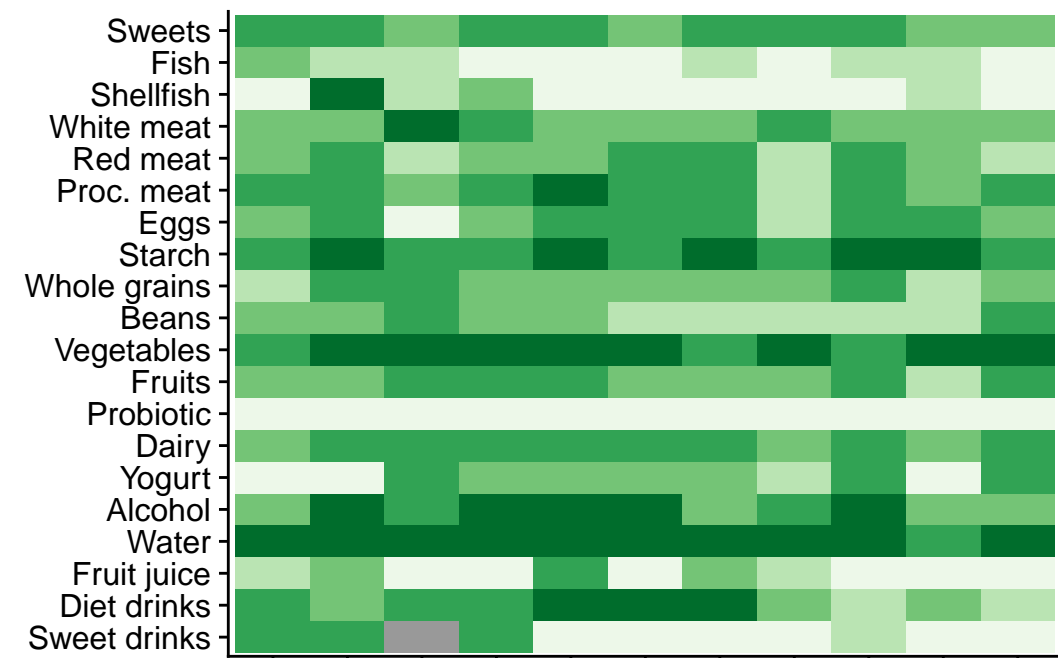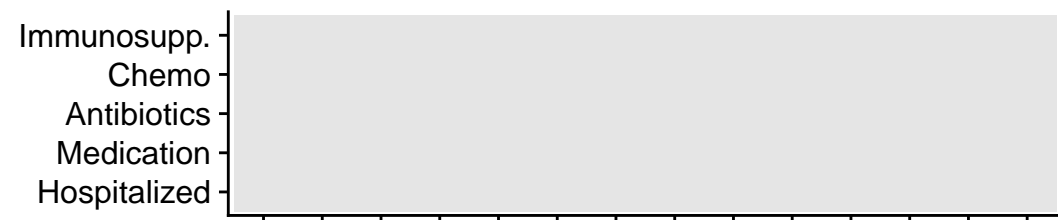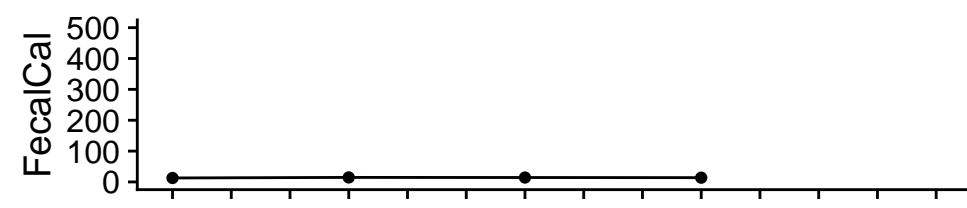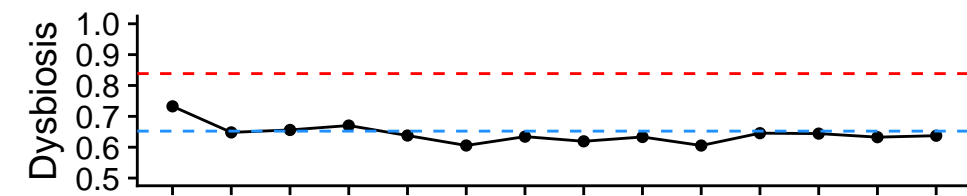

Serology

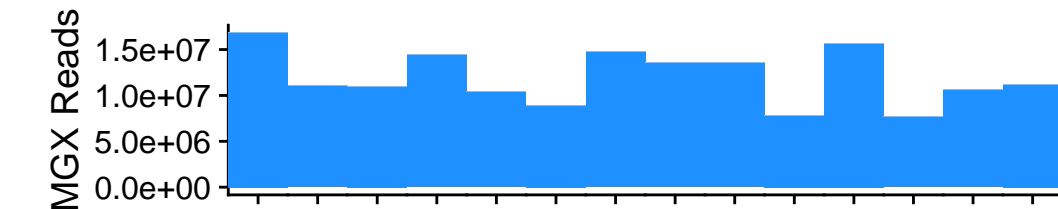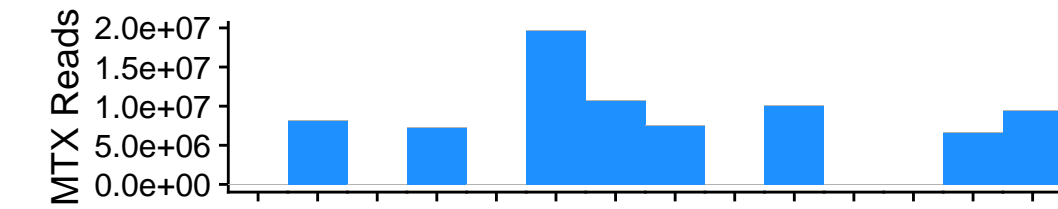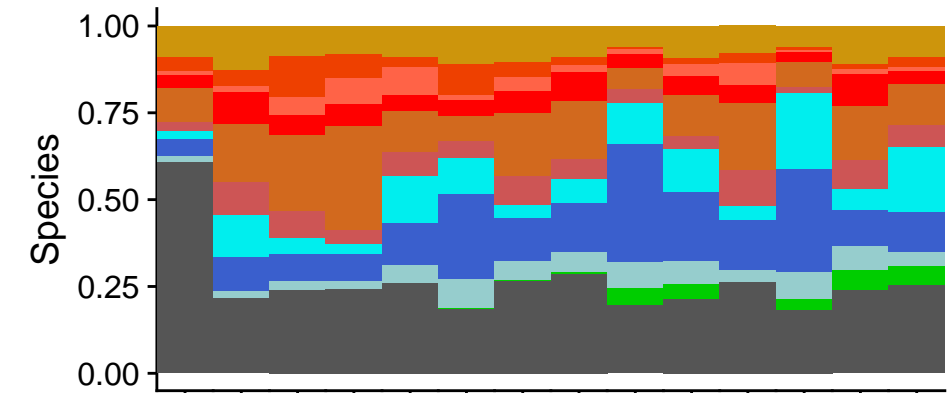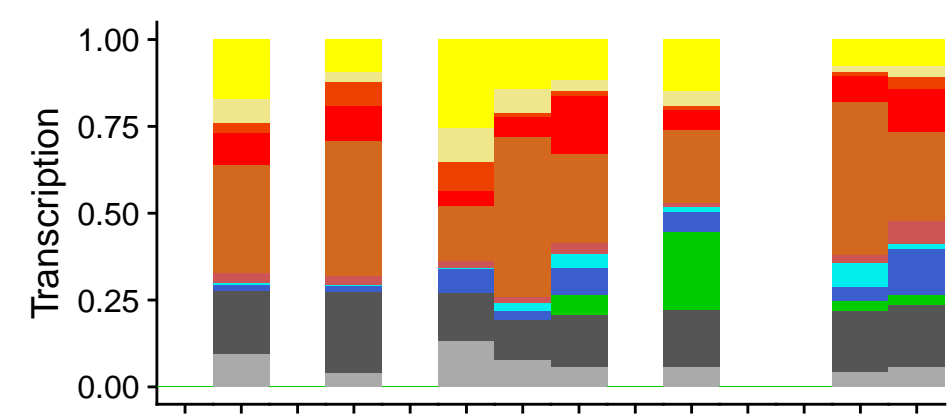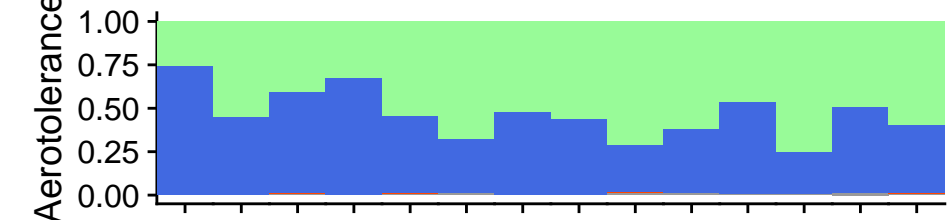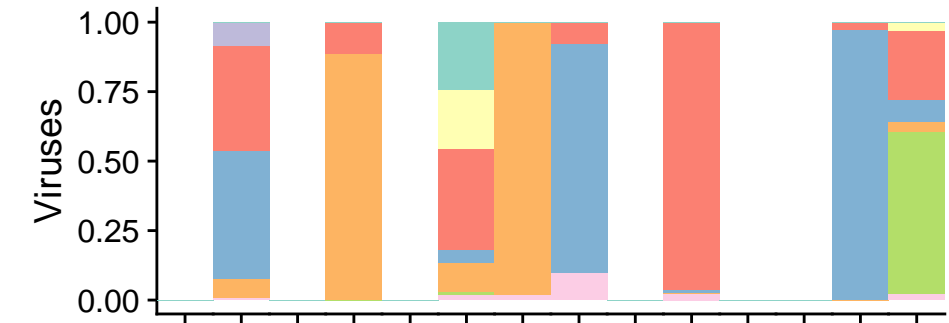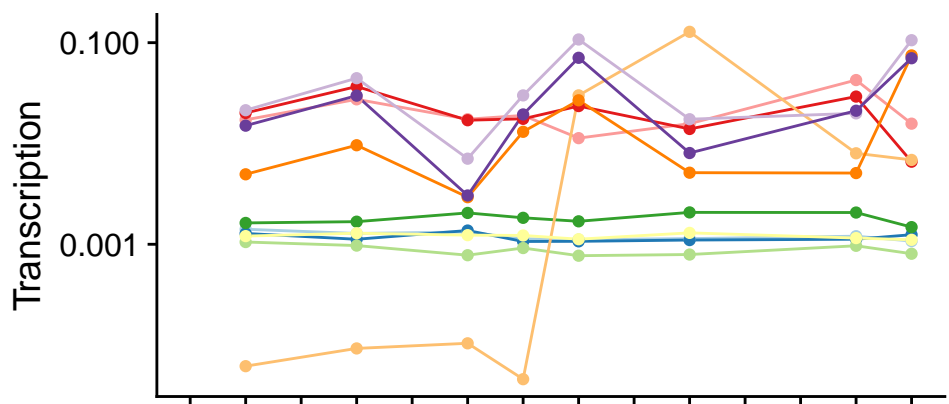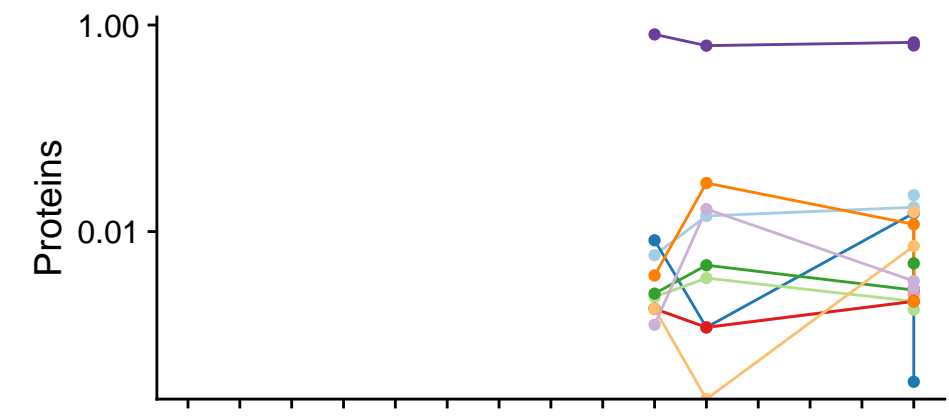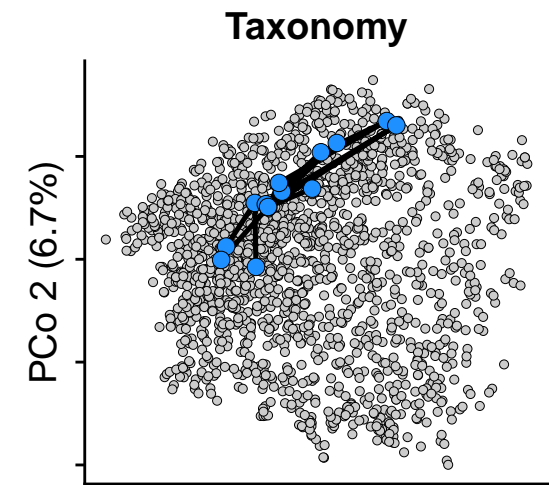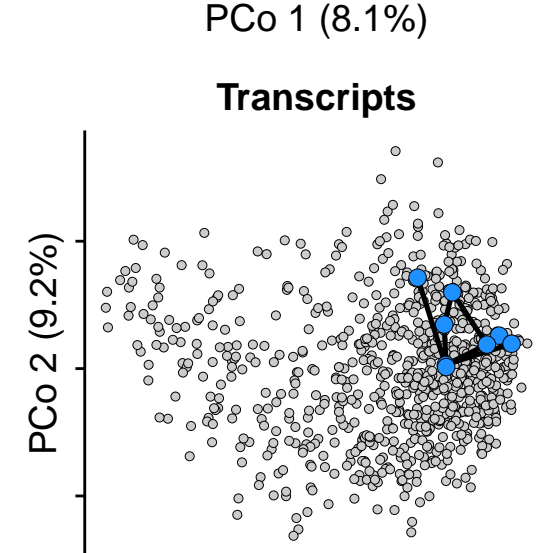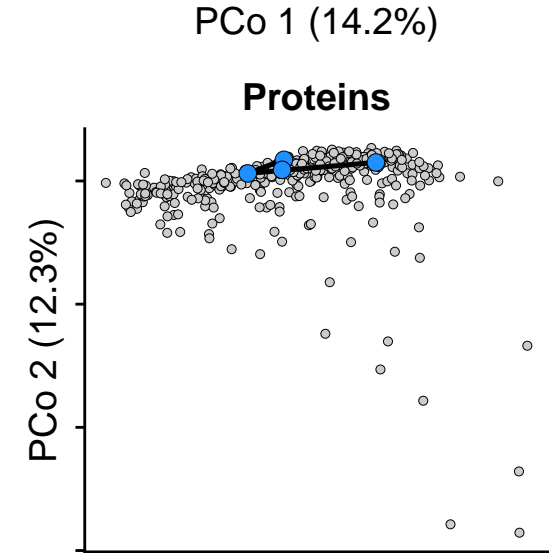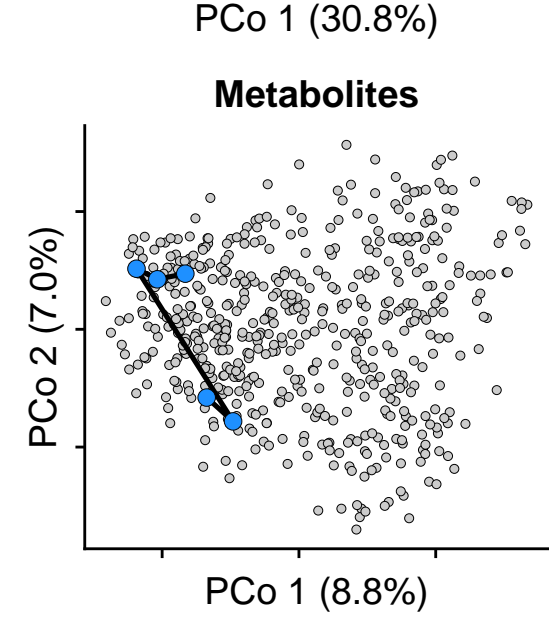

M2083: 25 Male White MGH | UC

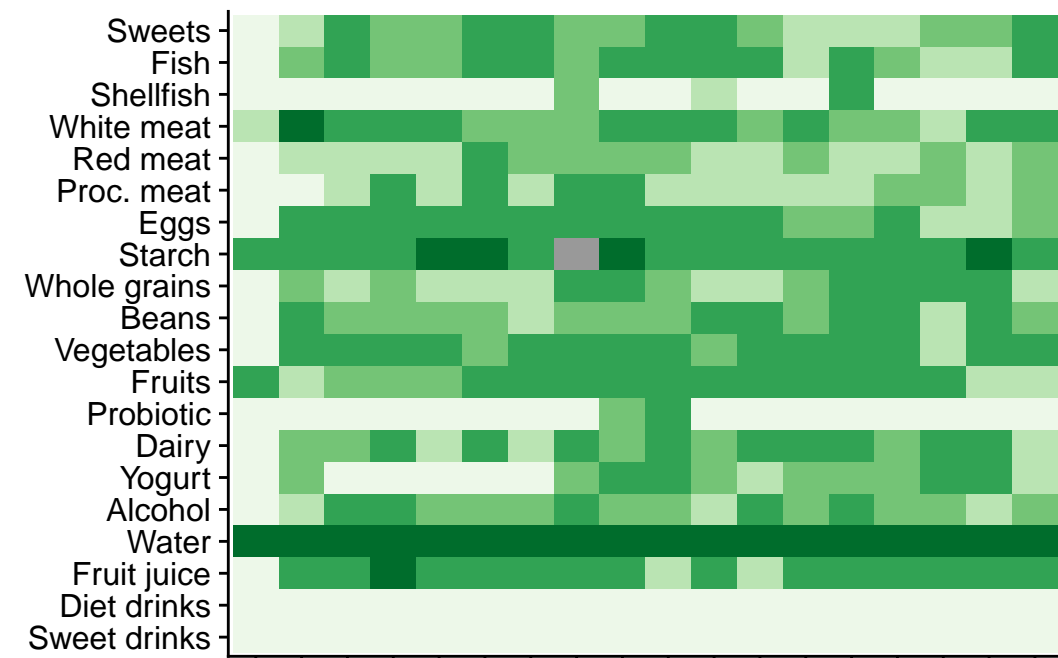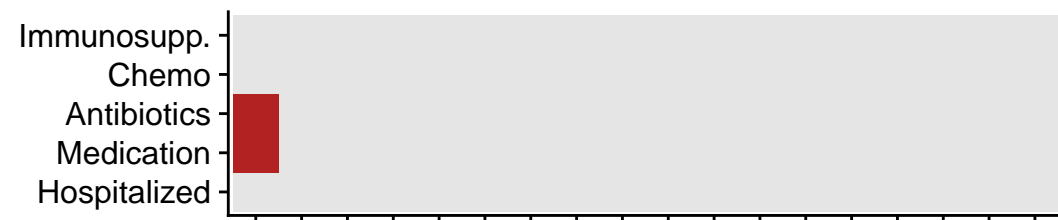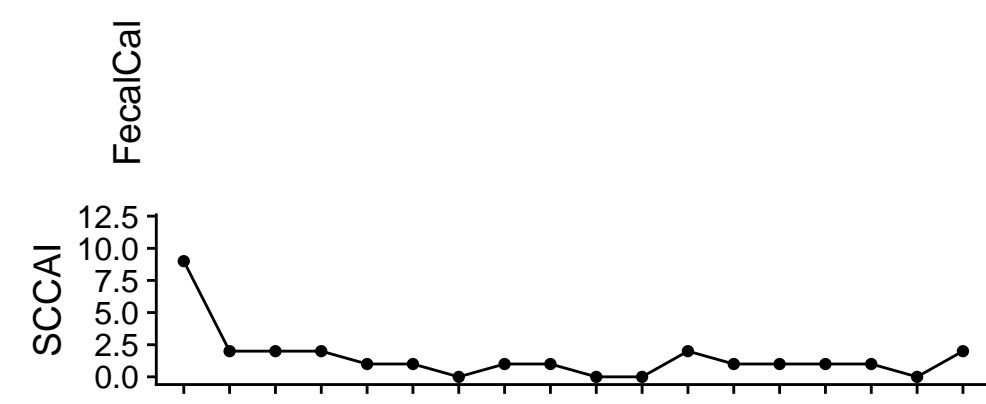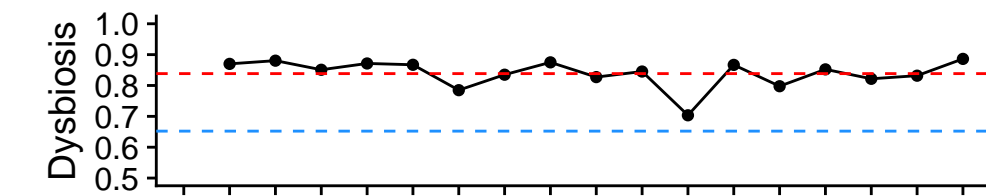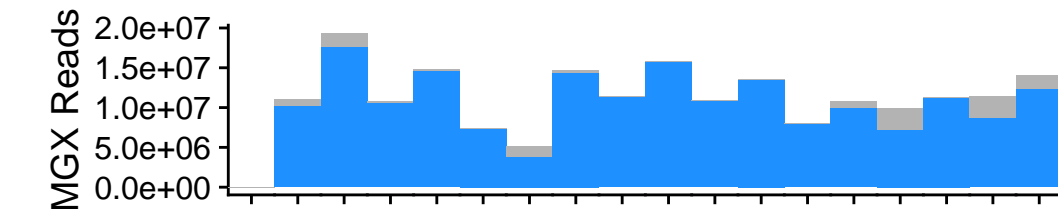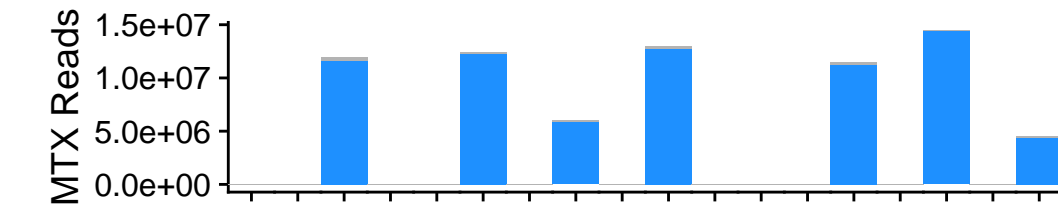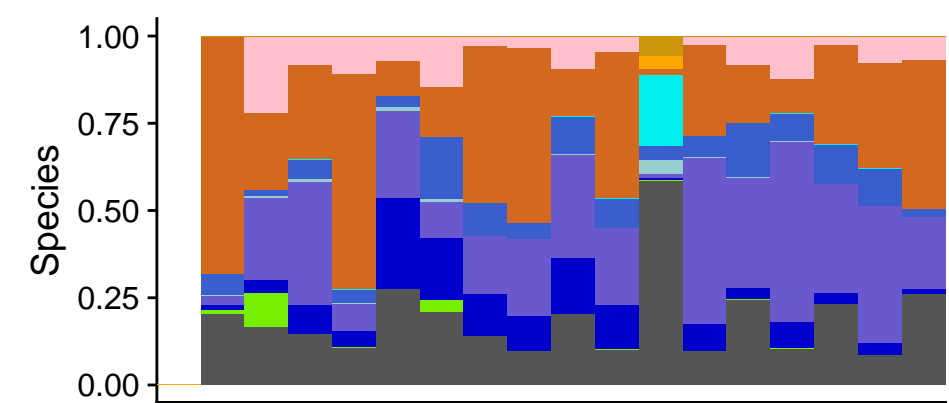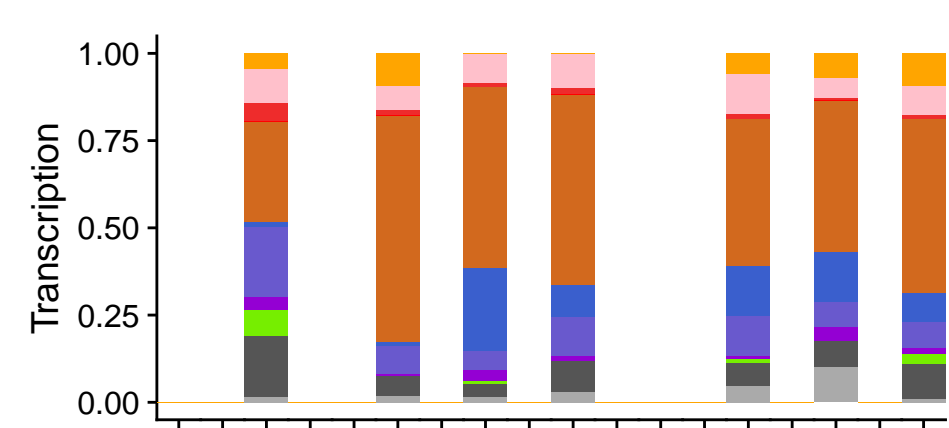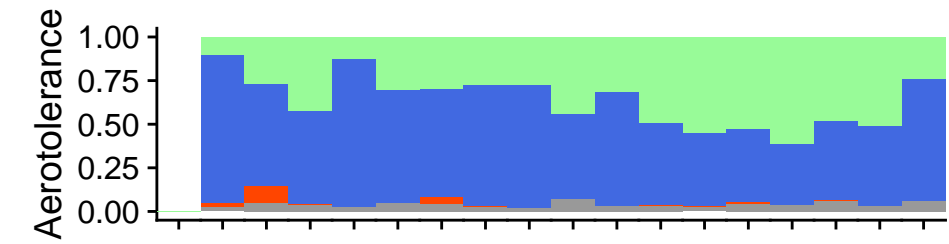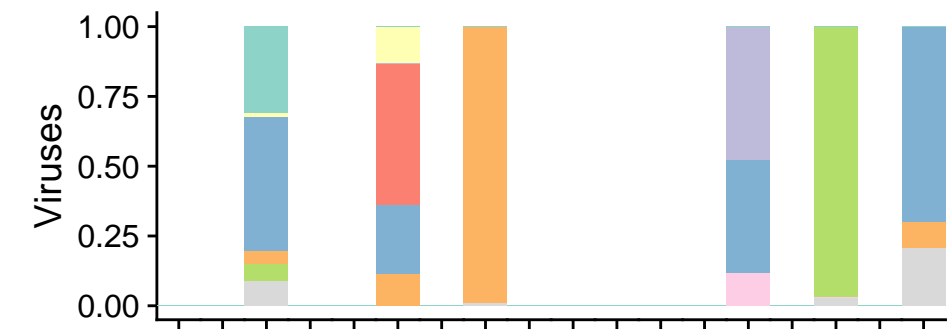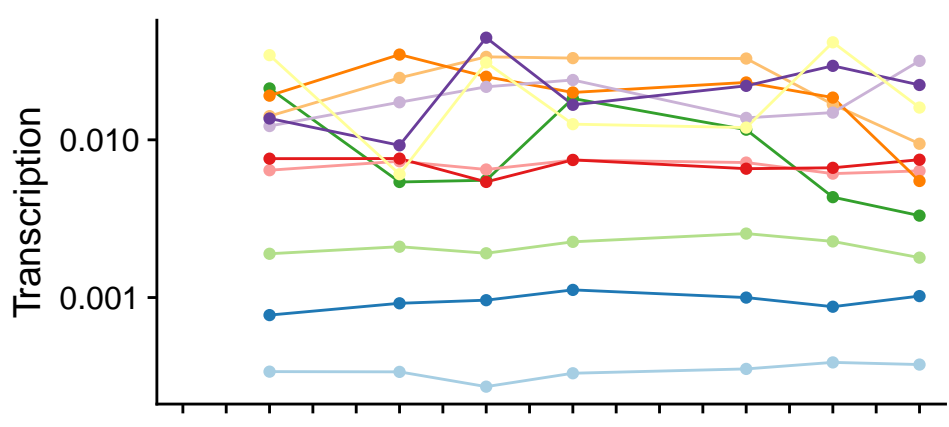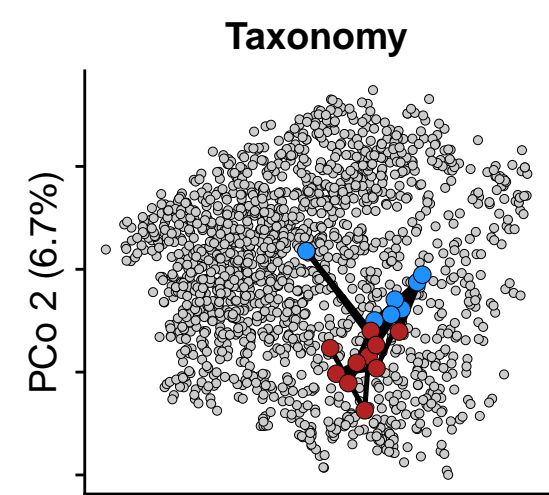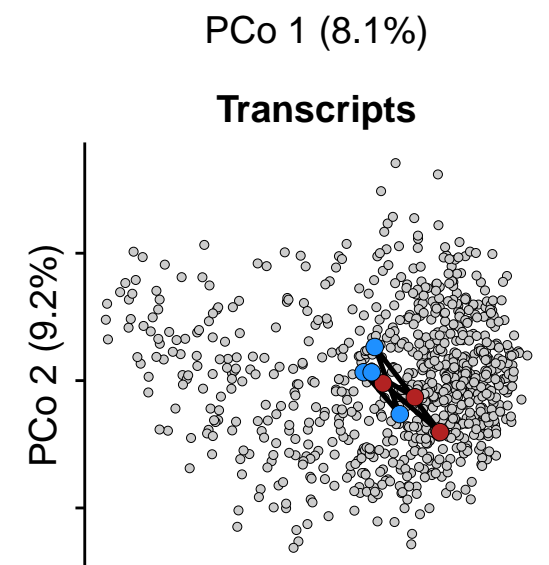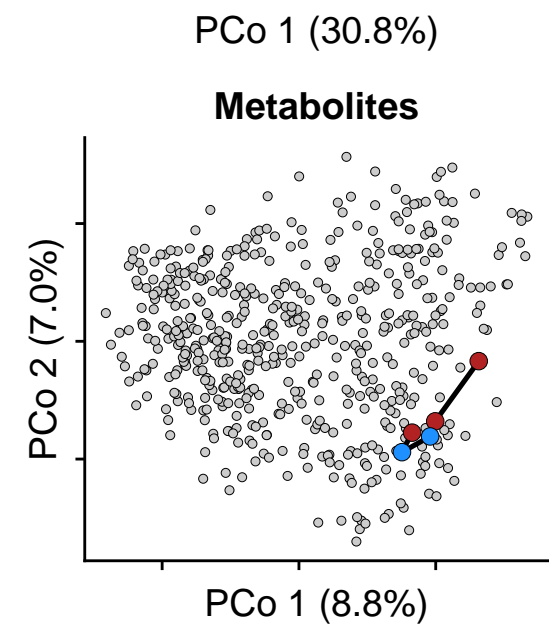

M2084: 23 Female White MGH | nonIBD

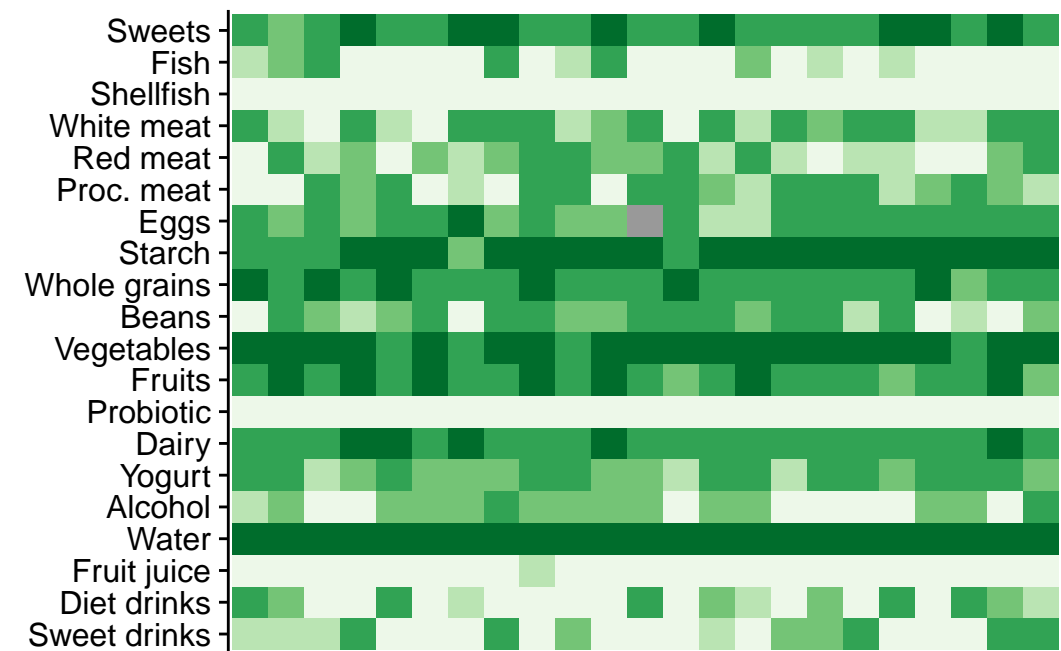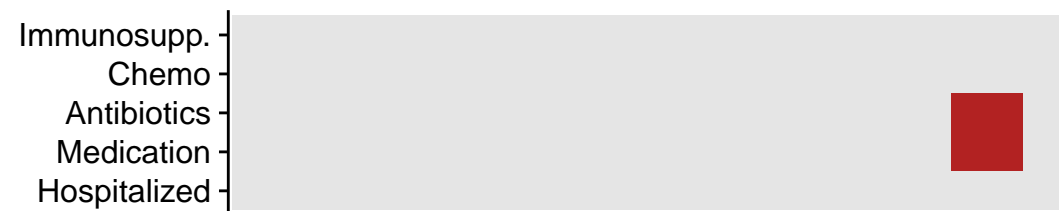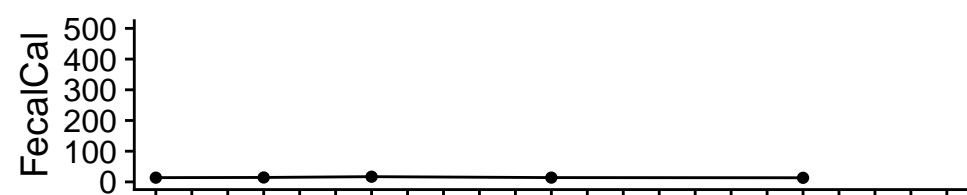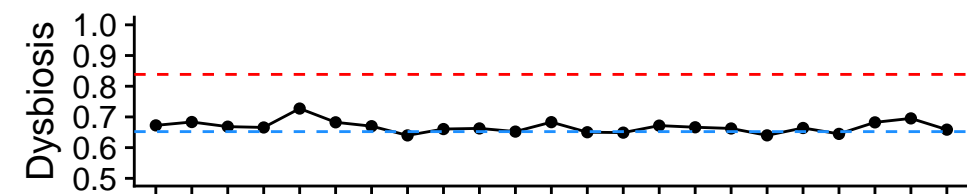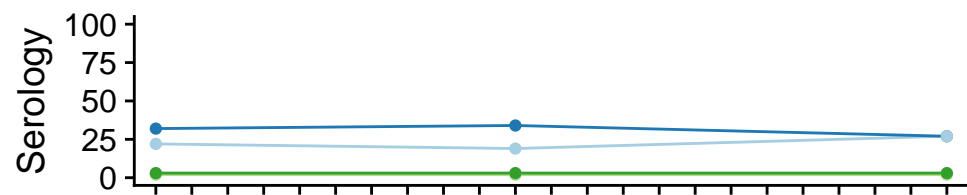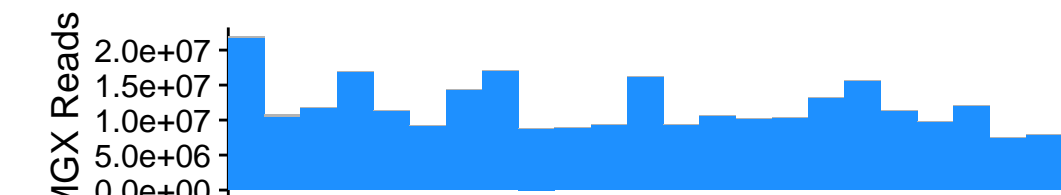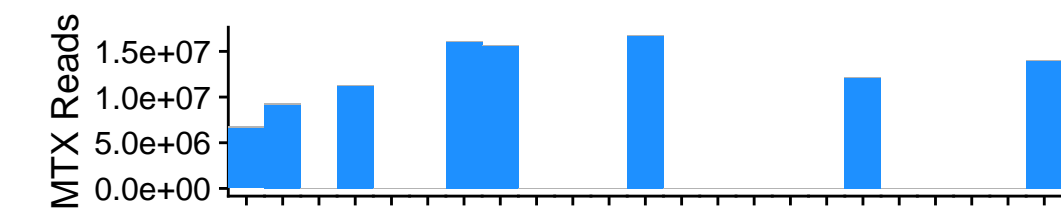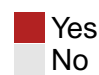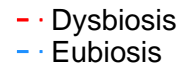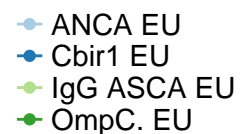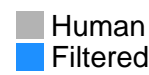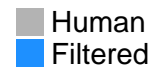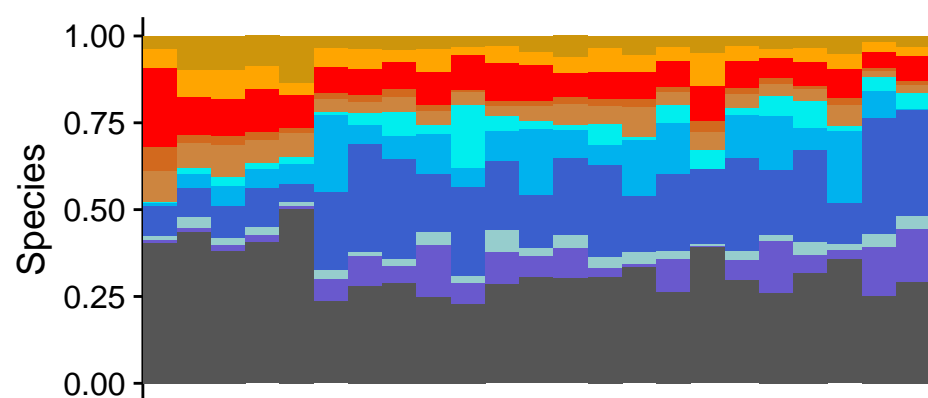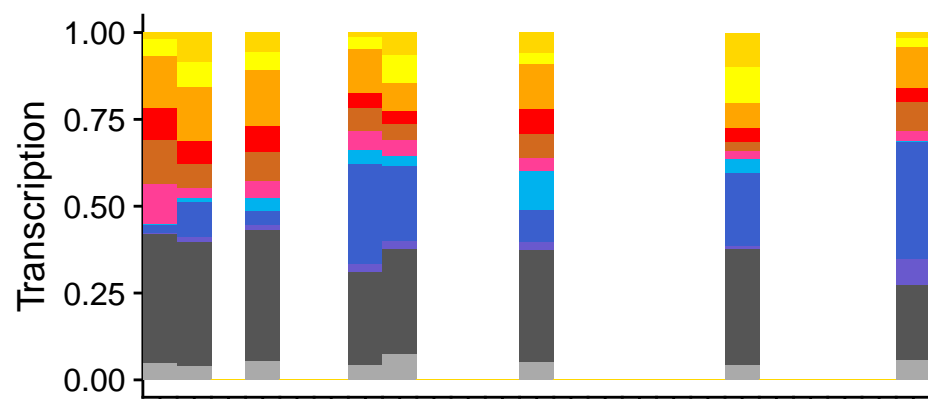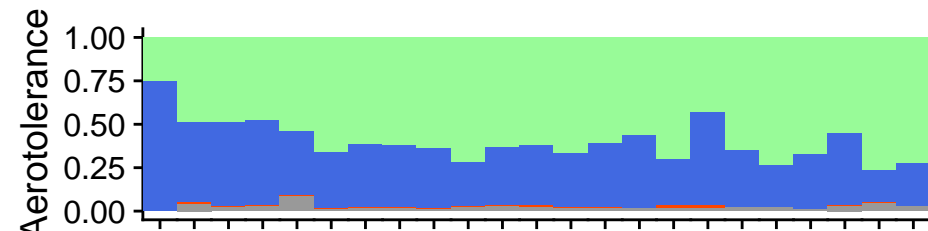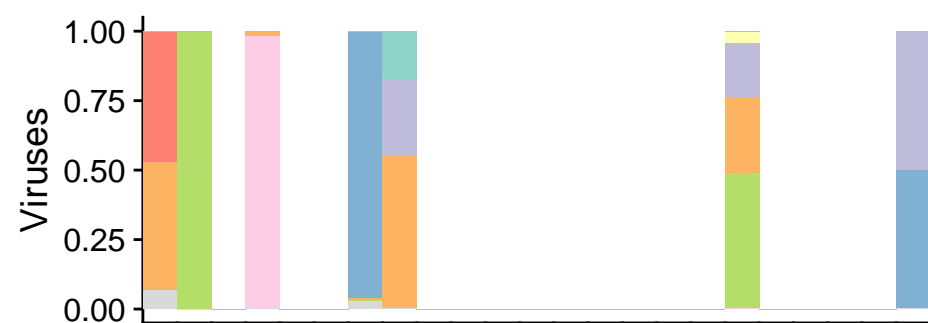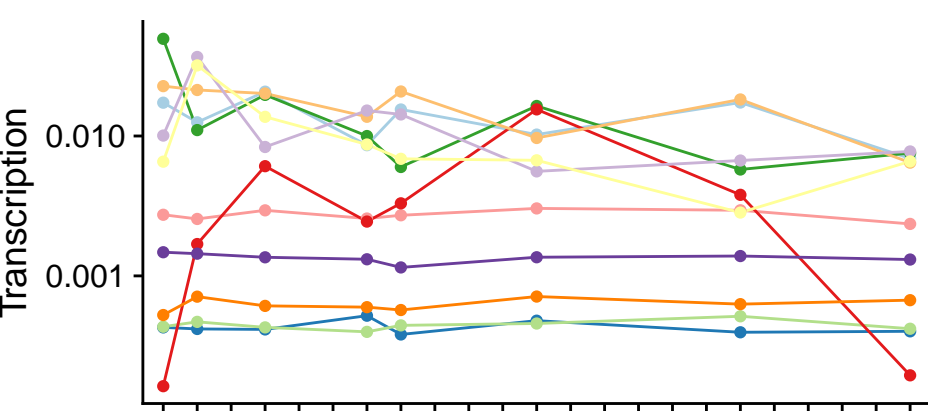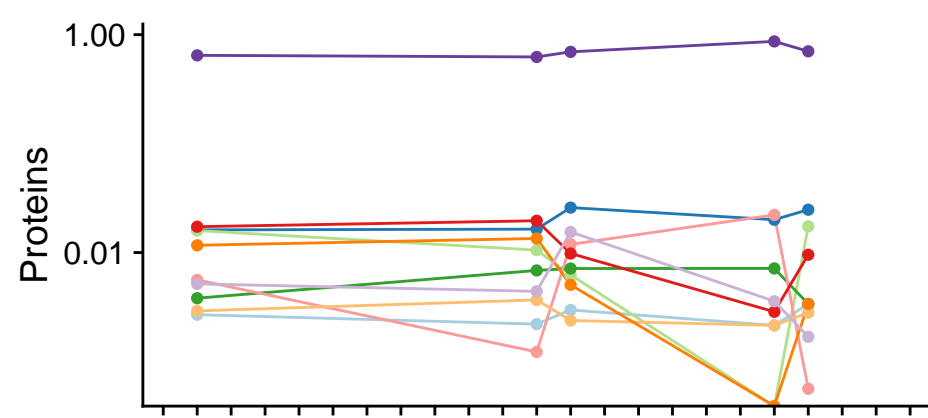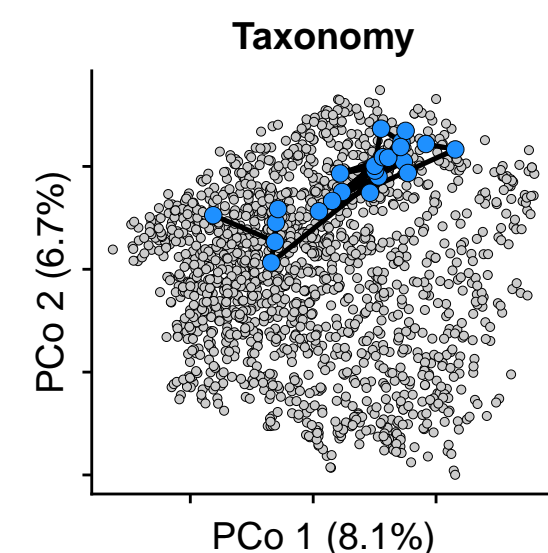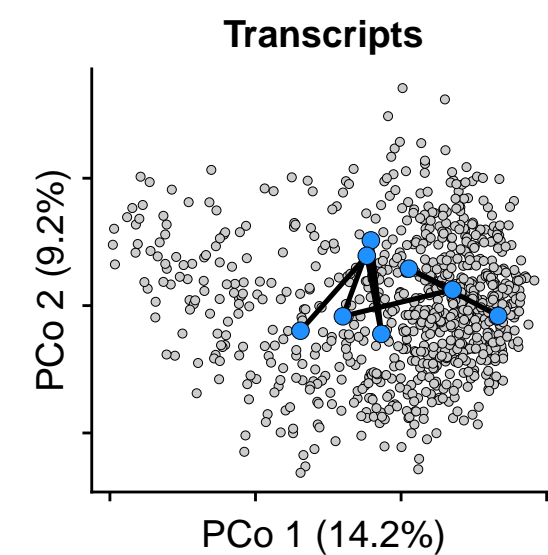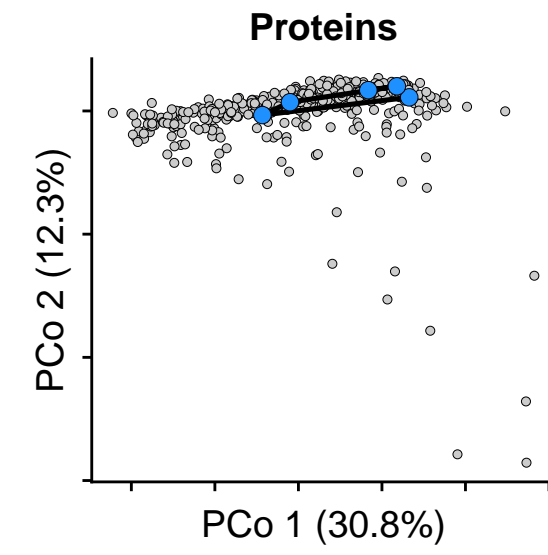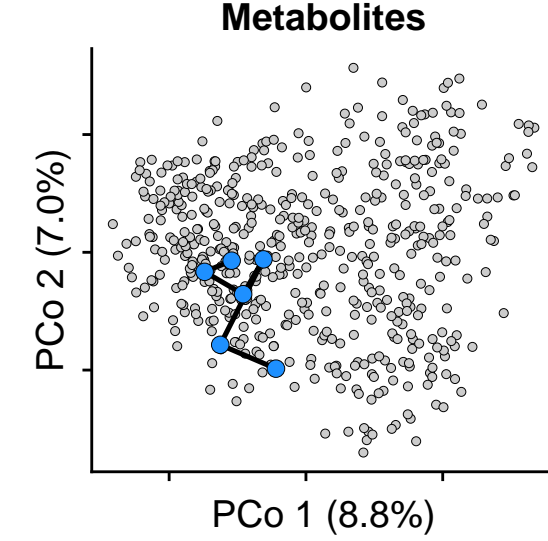

M2085: 23 Male White MGH | CD L1

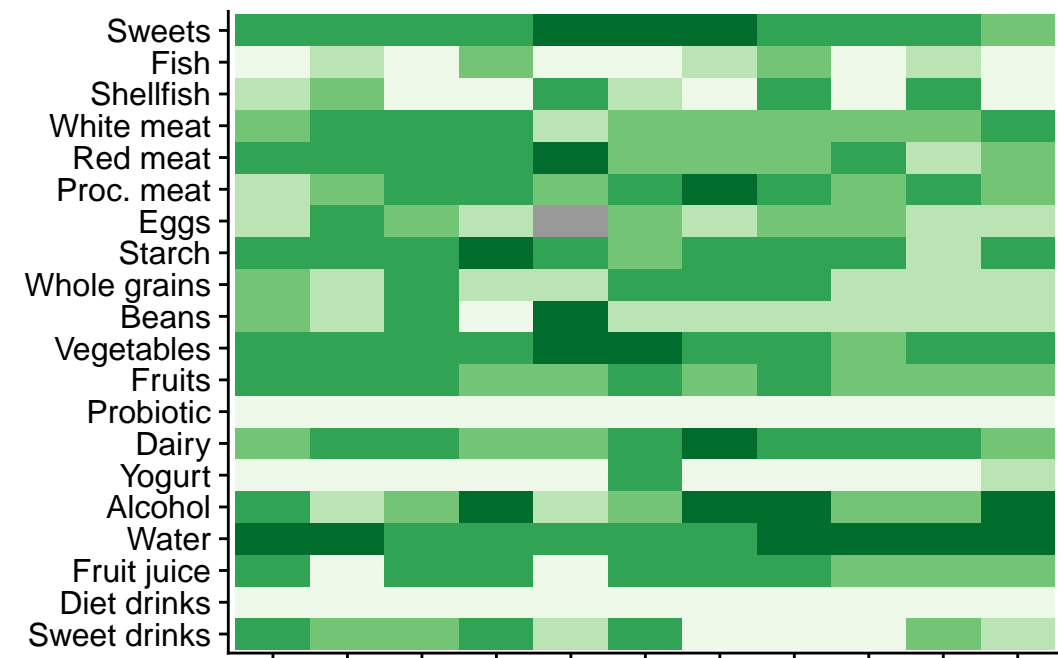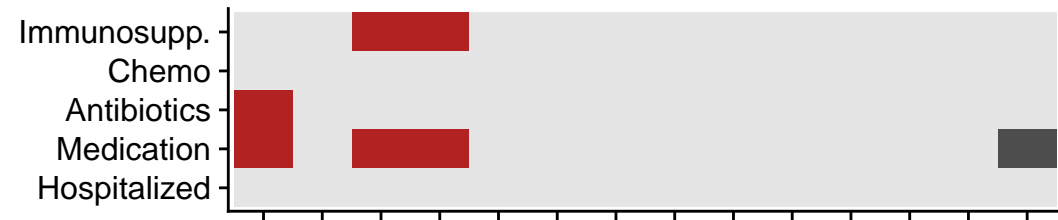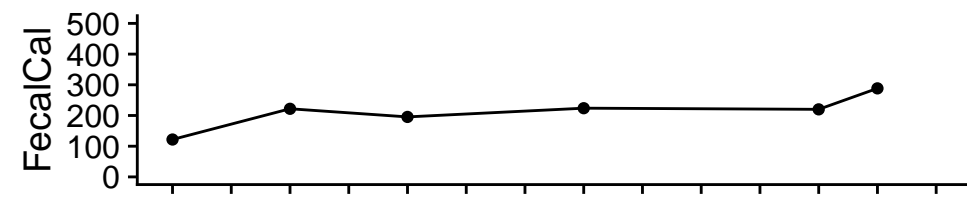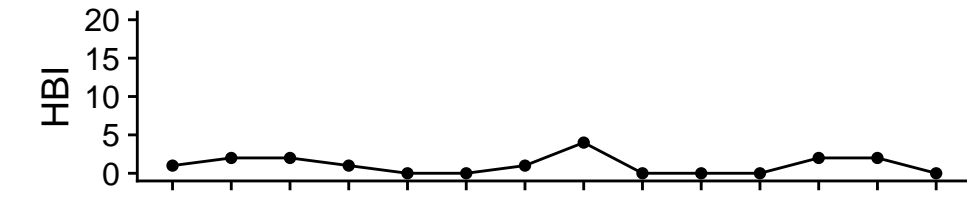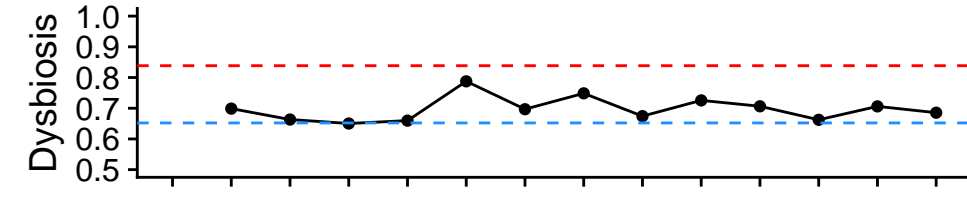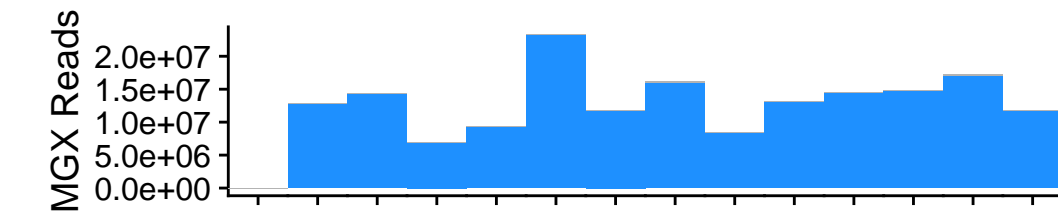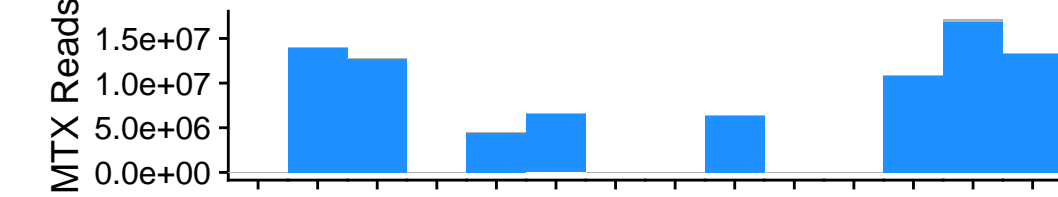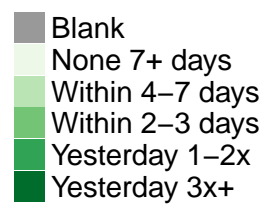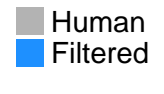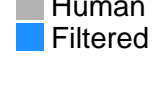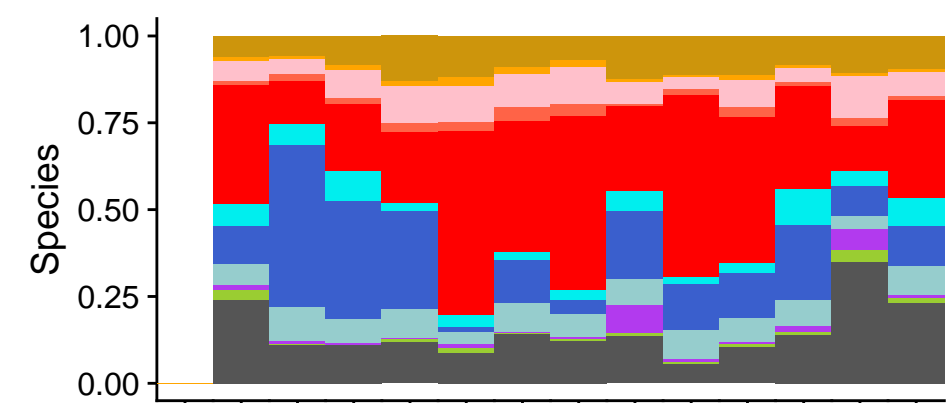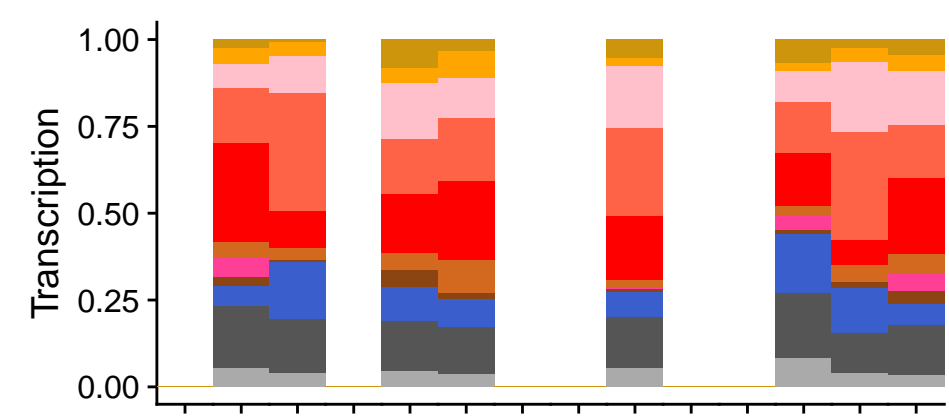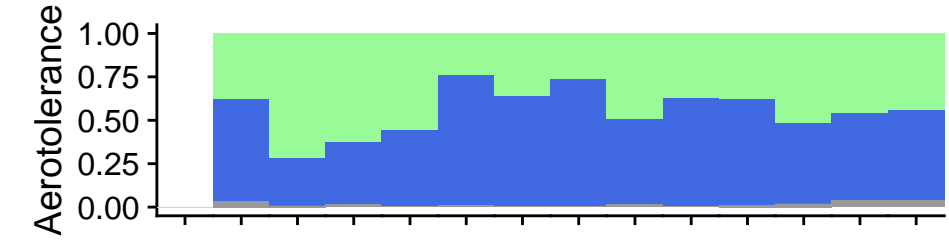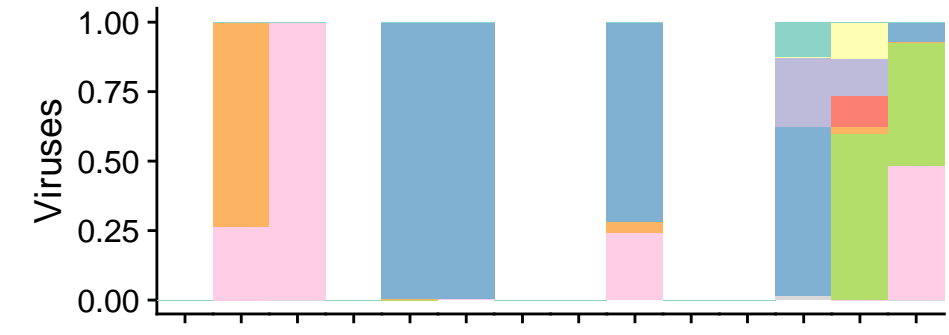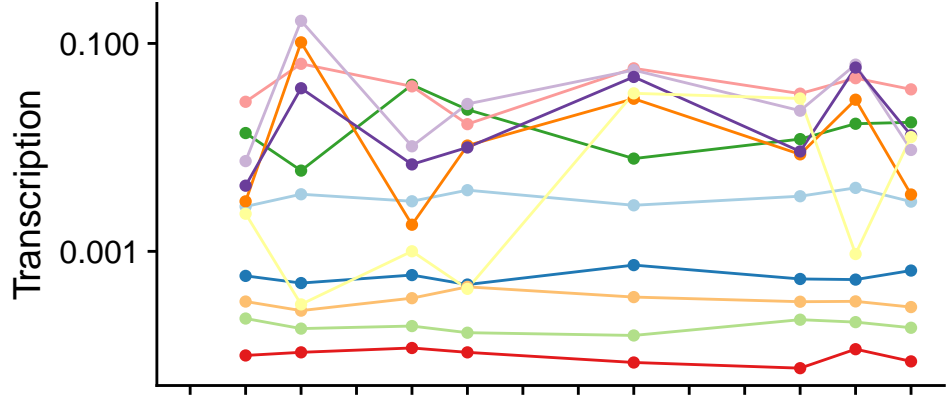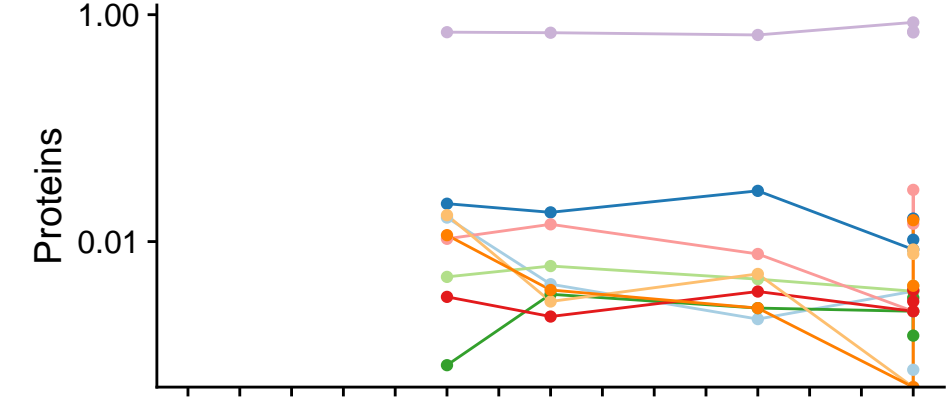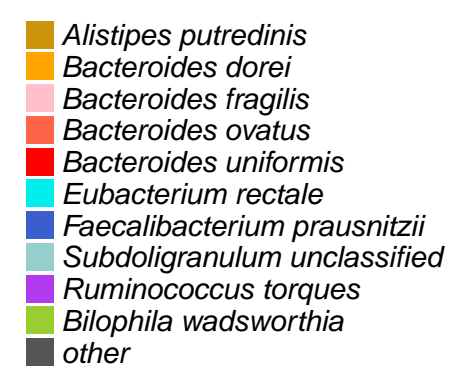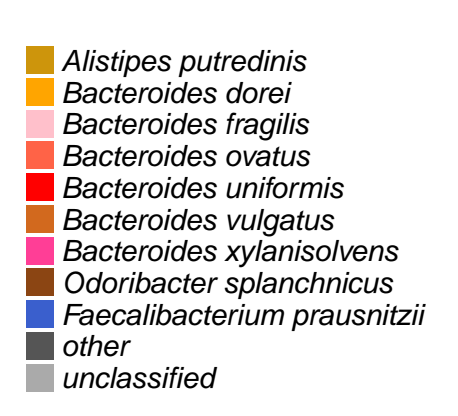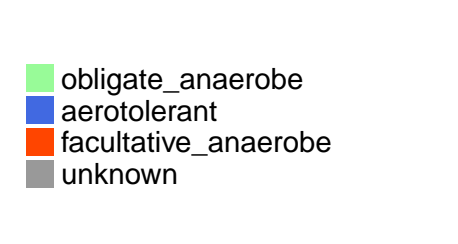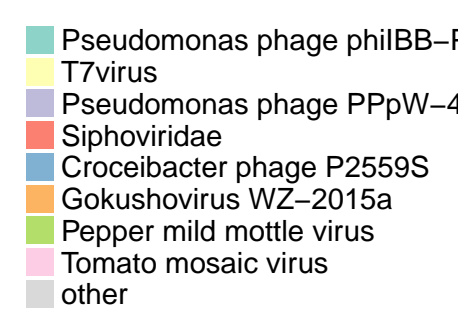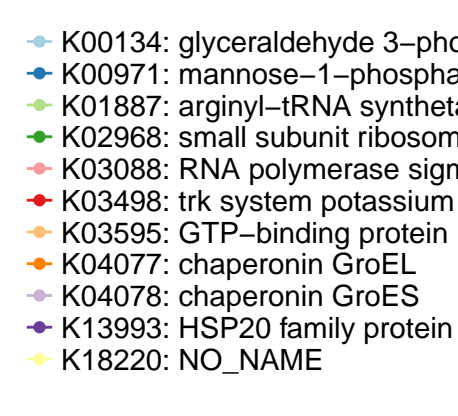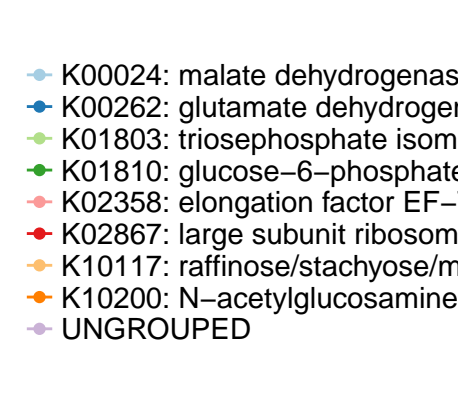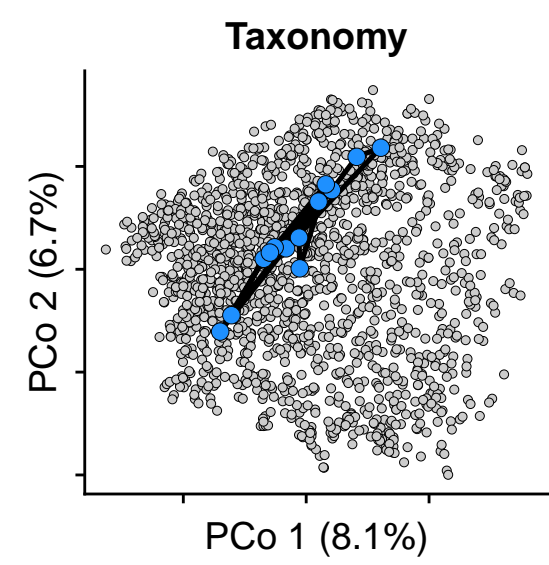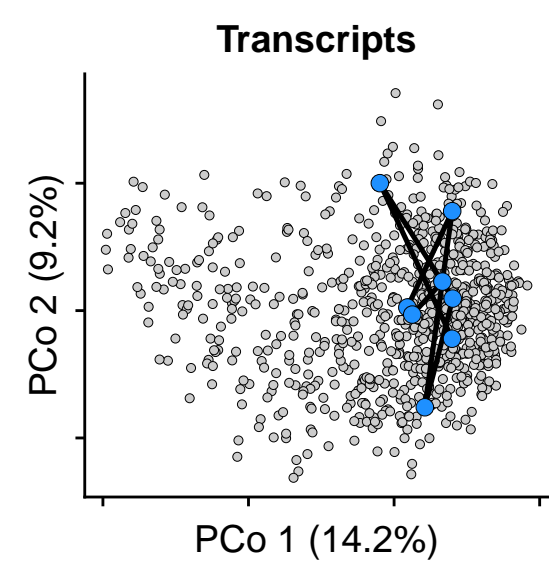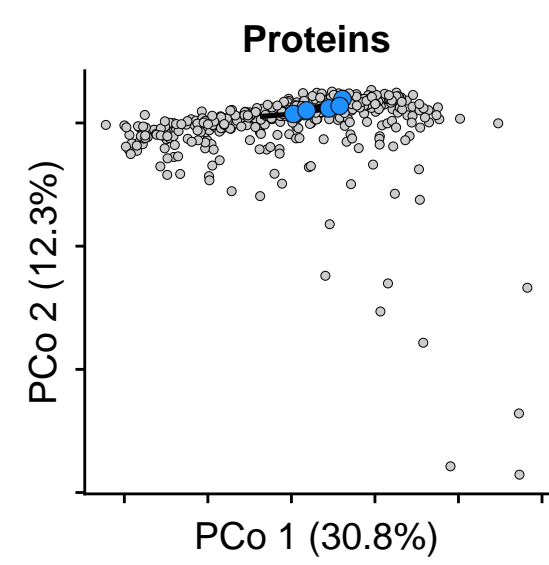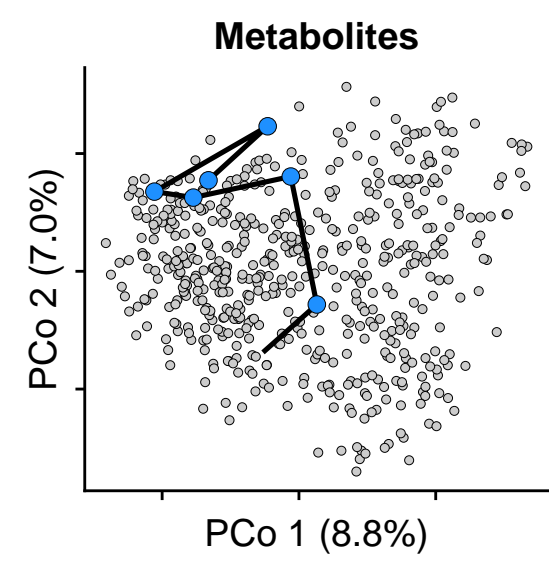

M2097: 21 Male White MGH | nonIBD

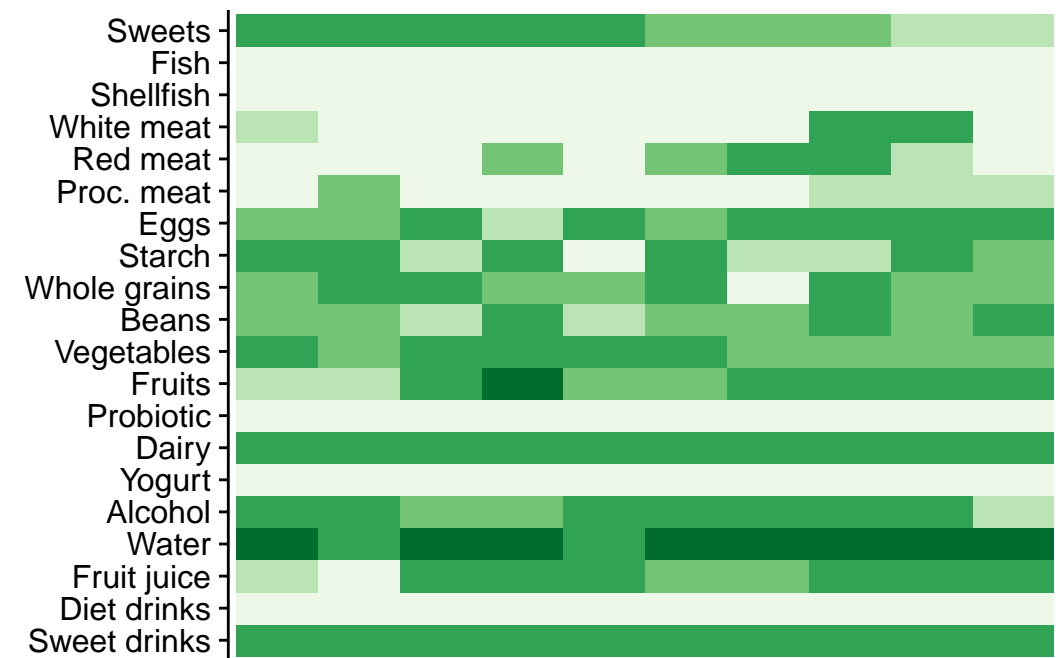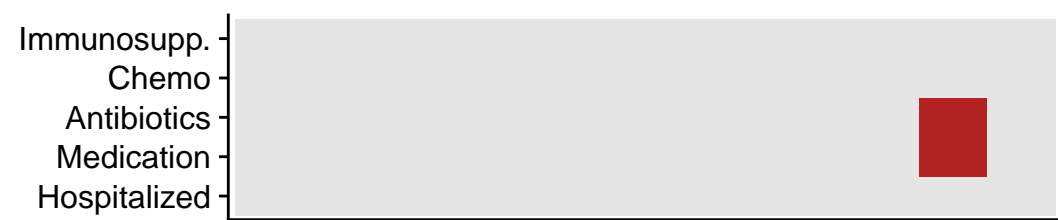

FecalCal

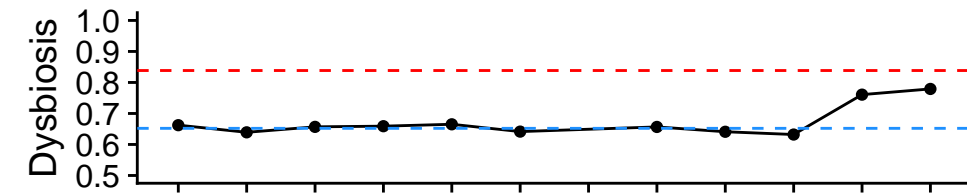

Serology

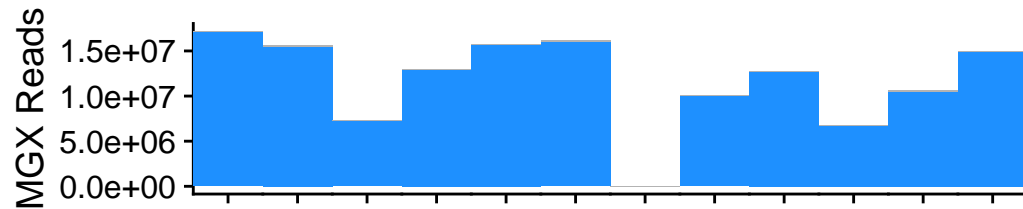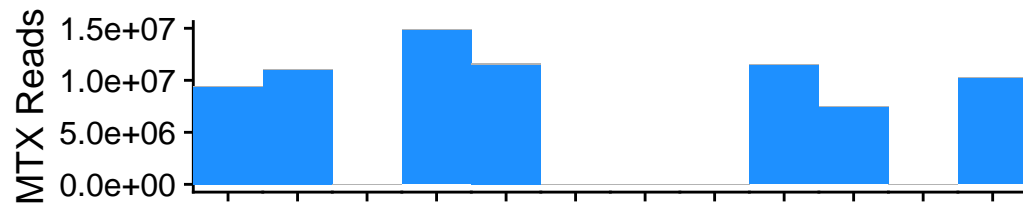

None 7+ days  
Within 4-7 days  
Within 2-3 days  
Yesterday 1-2x  
Yesterday 3x+

Yes  
No

Dysbiosis  
Eubiosis

Human  
Filtered

Human  
Filtered

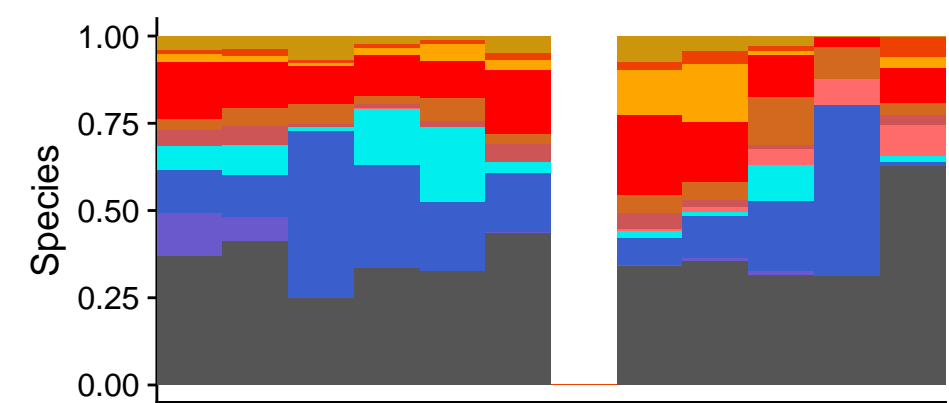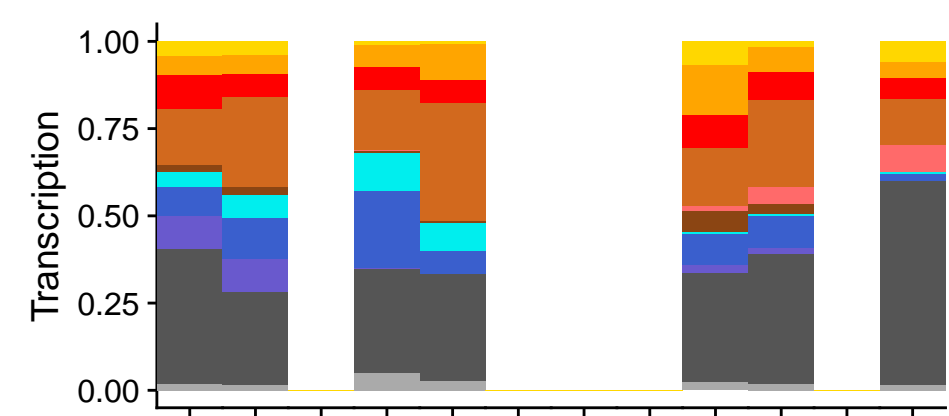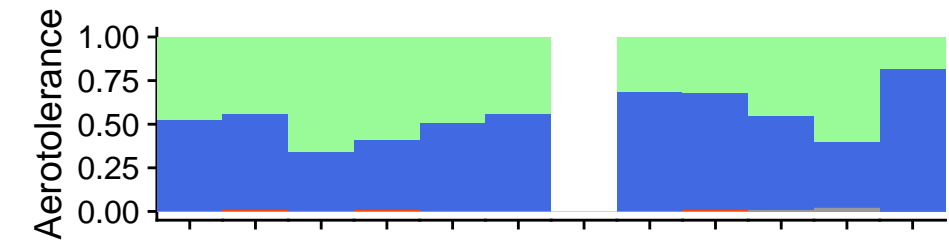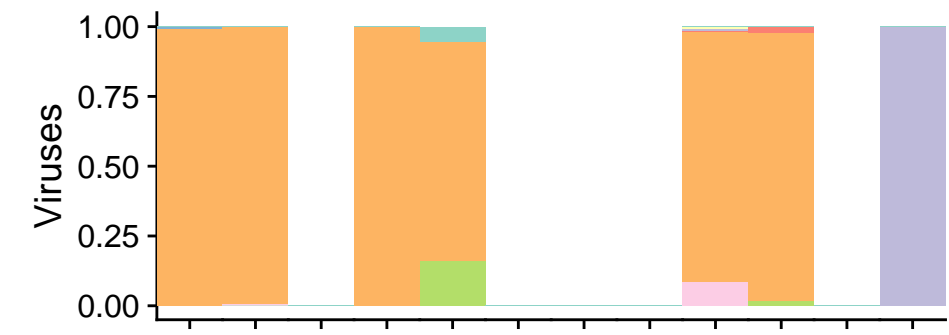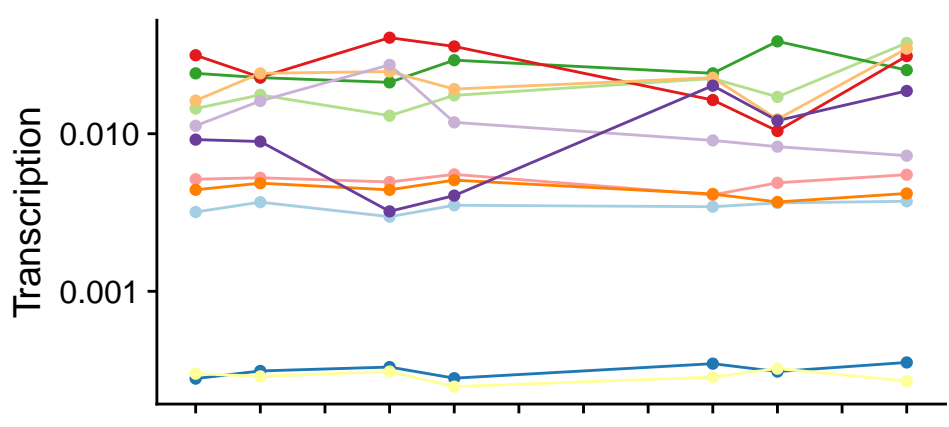

*Alistipes putredinis*  
*Bacteroides caccae*  
*Bacteroides dorei*  
*Bacteroides uniformis*  
*Bacteroides vulgatus*  
*Parabacteroides merdae*  
*Parabacteroides distasonis*  
*Eubacterium rectale*  
*Faecalibacterium prausnitzii*  
*Roseburia intestinalis*  
other

*Alistipes onderdonkii*  
*Bacteroides dorei*  
*Bacteroides uniformis*  
*Bacteroides vulgatus*  
*Parabacteroides distasonis*  
*Odoribacter splanchnicus*  
*Eubacterium rectale*  
*Faecalibacterium prausnitzii*  
*Roseburia intestinalis*  
other  
unclassified

obligate anaerobe  
aerotolerant  
facultative anaerobe  
unknown

Pseudomonas phage phi15  
Pseudomonas phage phi1BB-PF7A  
T7virus  
Lactococcus phage 936 sensu lato  
unclassified Siphoviridae  
Gokushovirus WZ-2015a  
Pepper mild mottle virus  
Apple stem pitting virus  
other

K00850: 6-phosphofructokinase 1 [EC:2.7.1....  
K01755: argininosuccinate lyase [EC:4.3.2.1]  
K02078: acyl carrier protein  
K02358: elongation factor EF-Tu  
K02906: large subunit ribosomal protein L3  
K02911: large subunit ribosomal protein L32  
K02914: large subunit ribosomal protein L34  
K02926: large subunit ribosomal protein L4  
K02970: small subunit ribosomal protein S21  
K03088: RNA polymerase sigma-70 factor, E...  
K11755: phosphoribosyl-ATP pyrophosphoh...

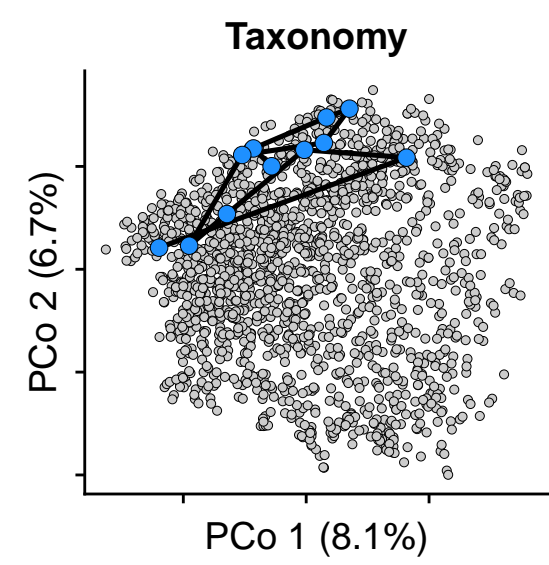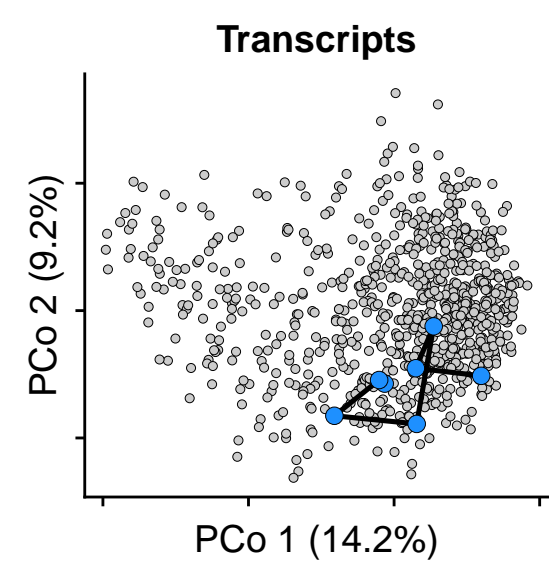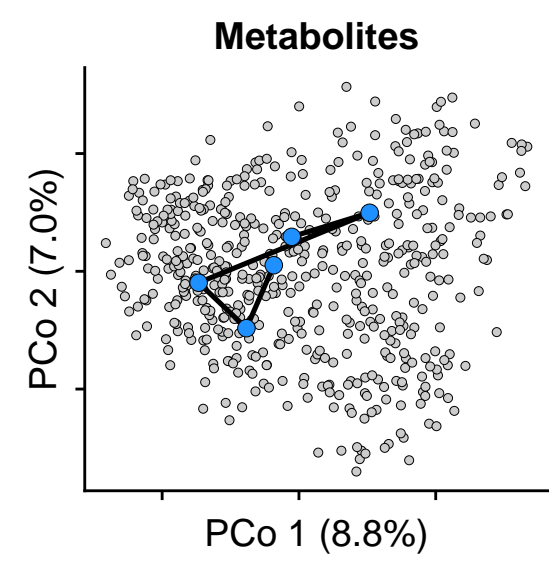

M2103: 35 Female White MGH | UC

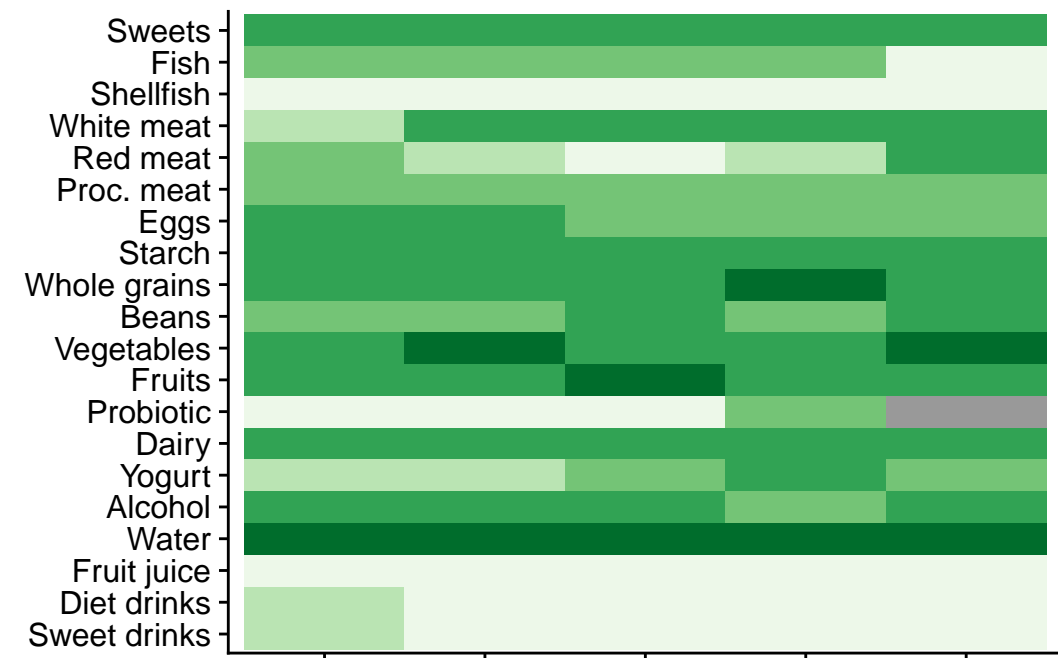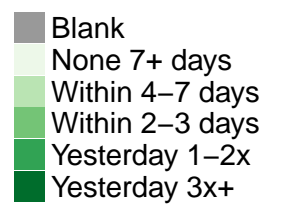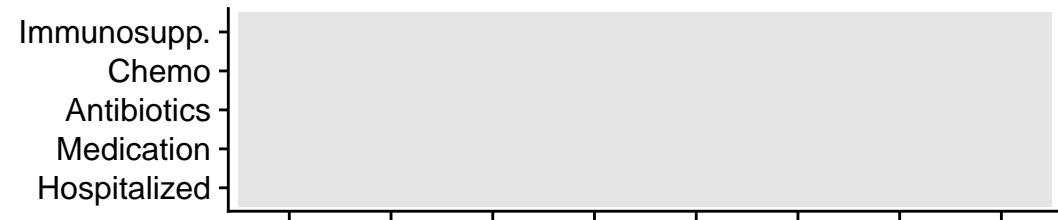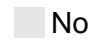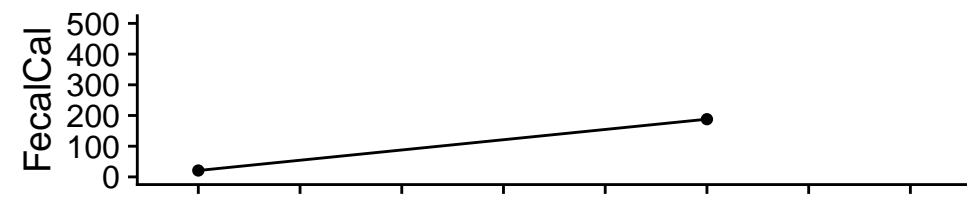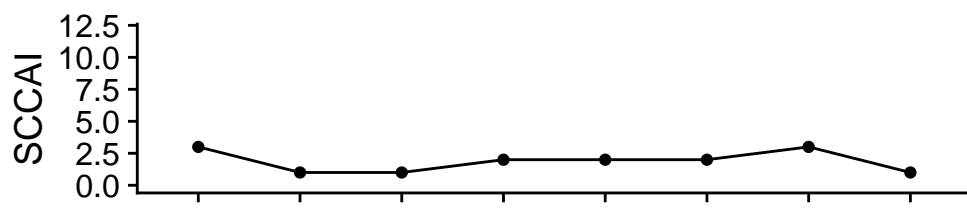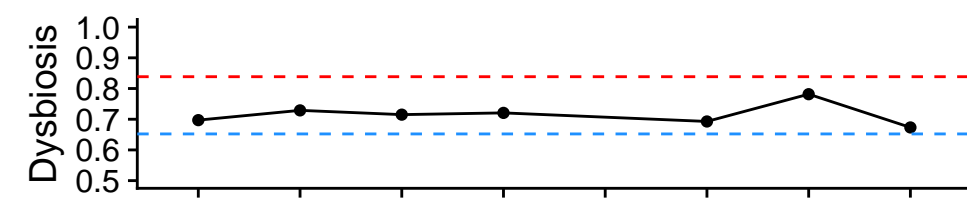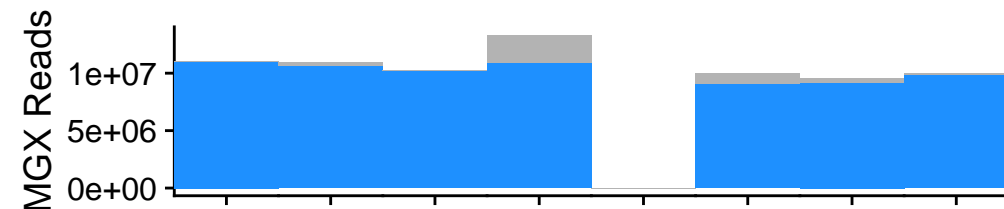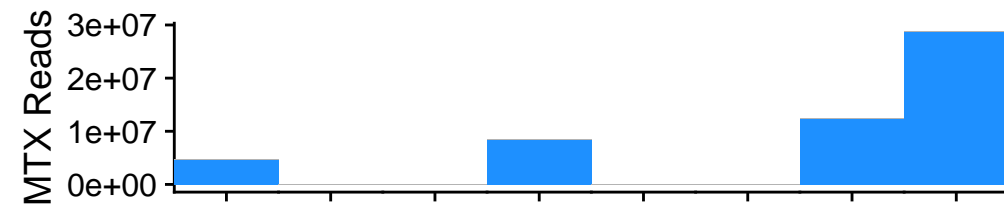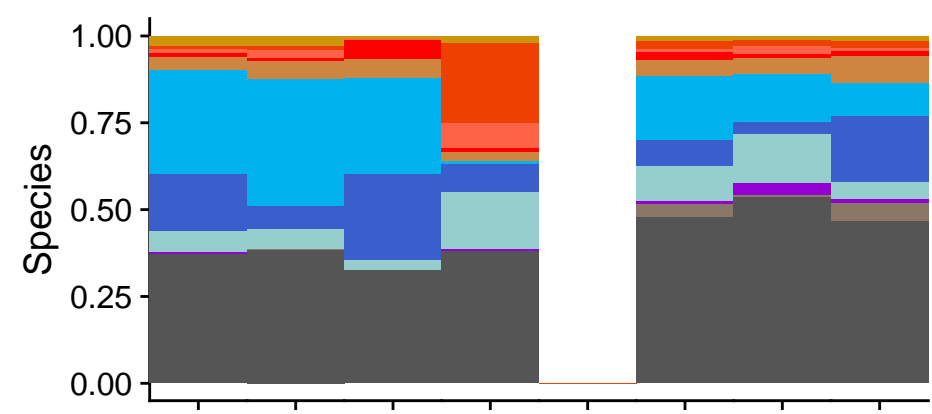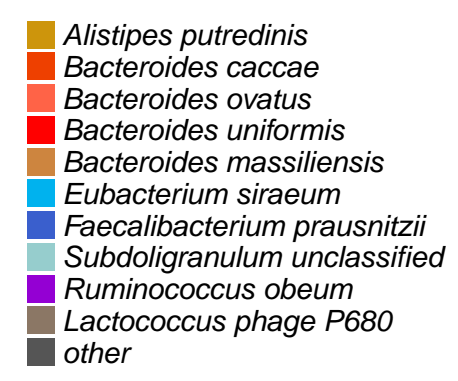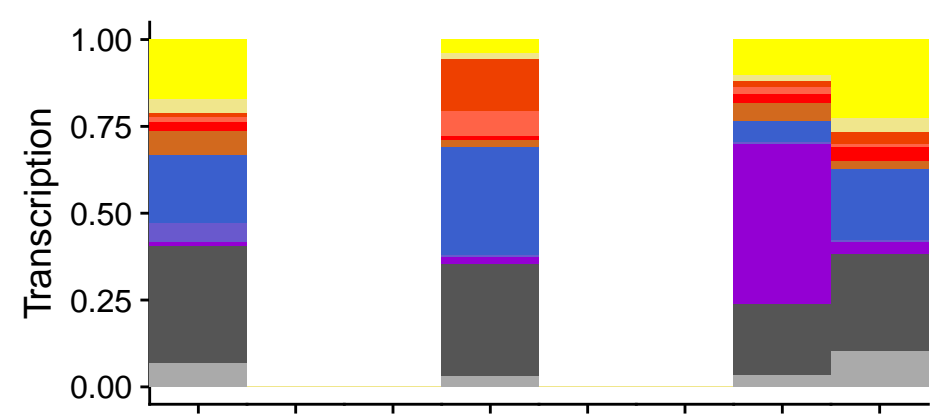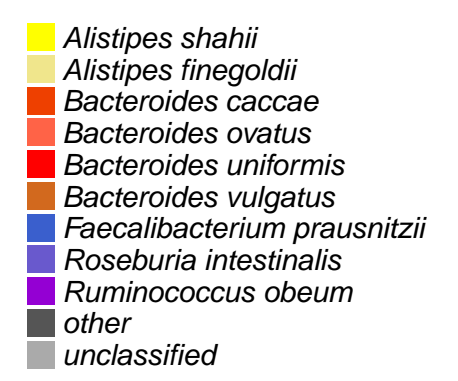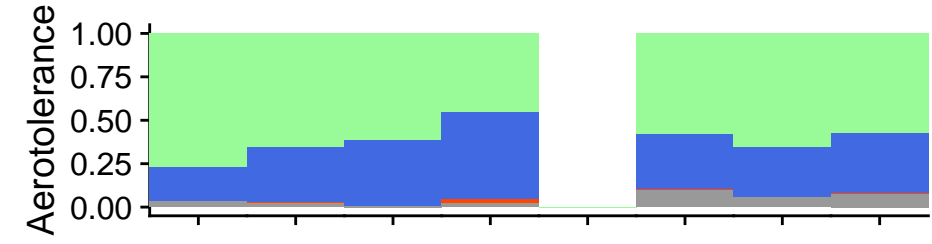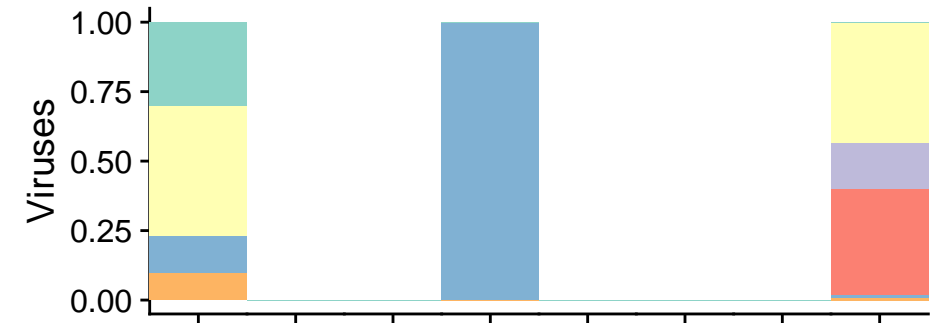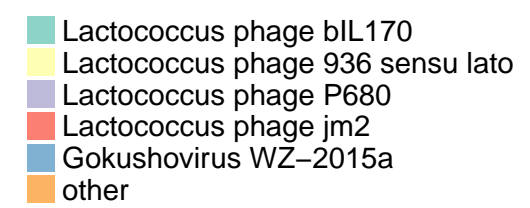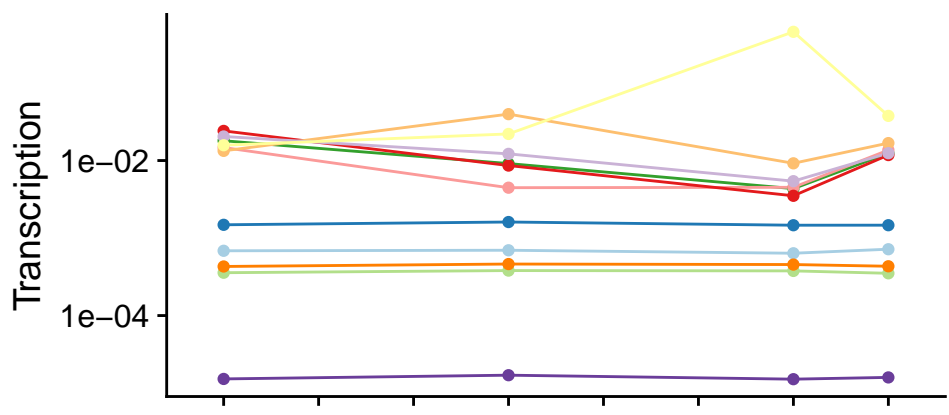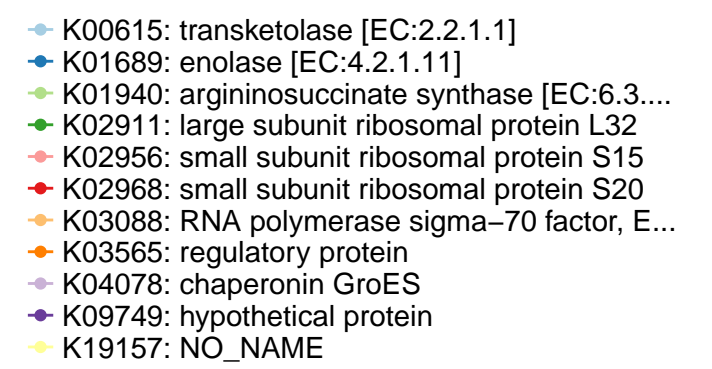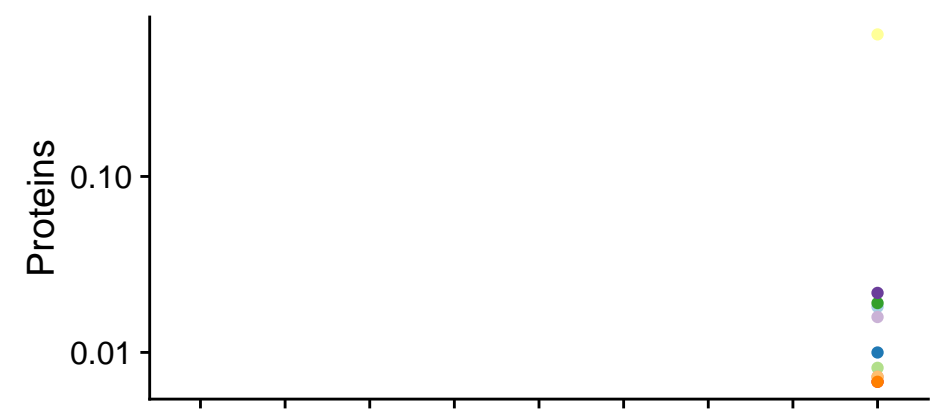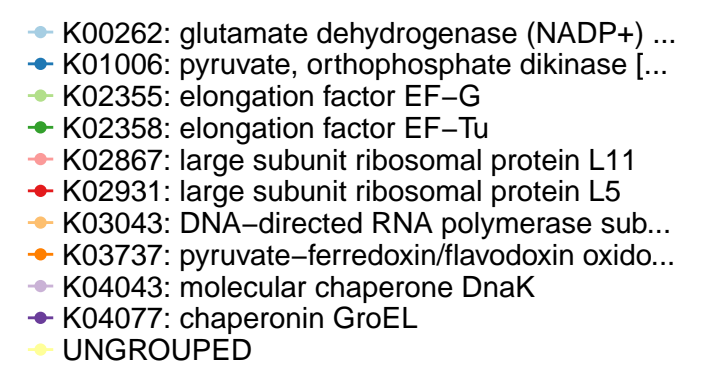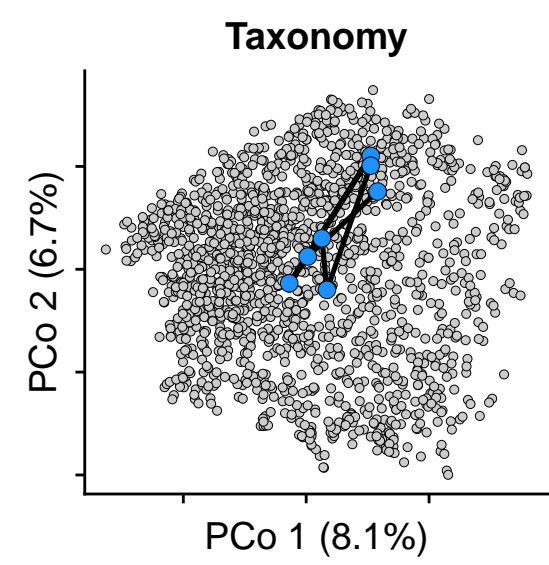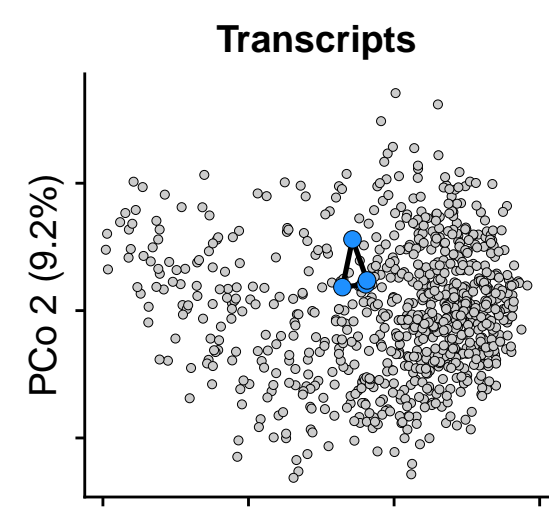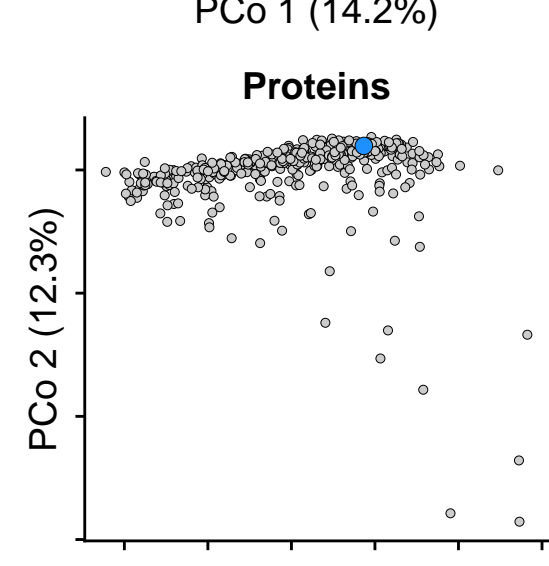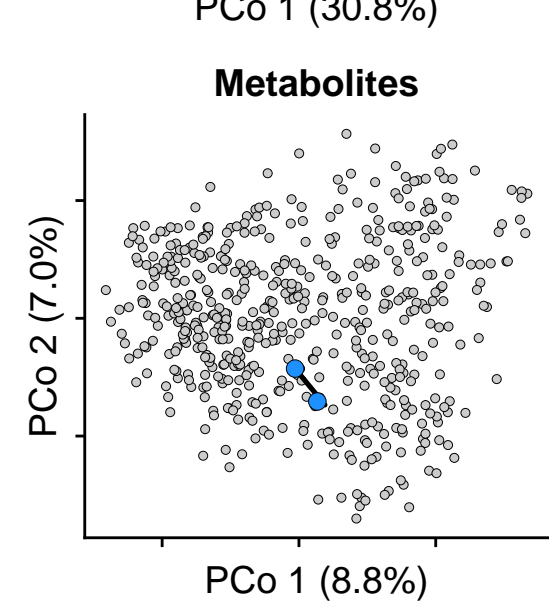



P6005: 11 Male White MGH Pediatrics | CD L3+L4

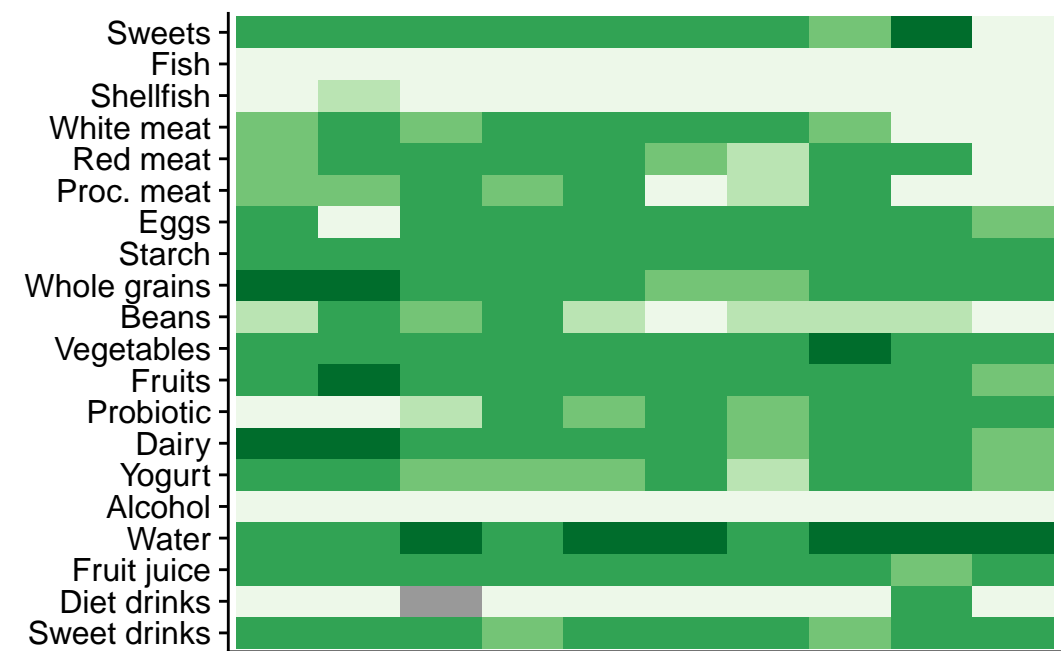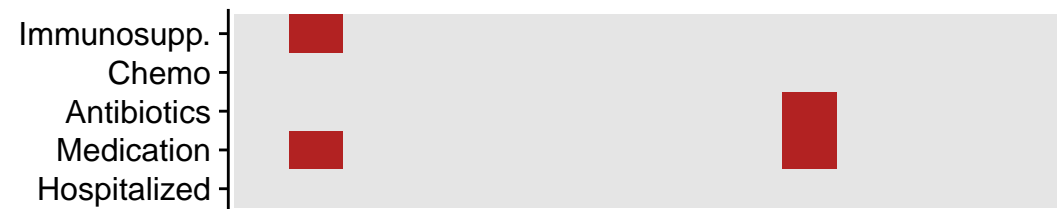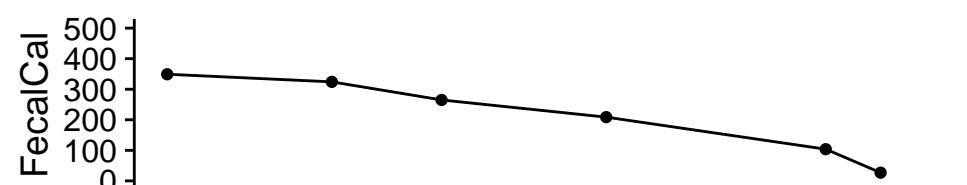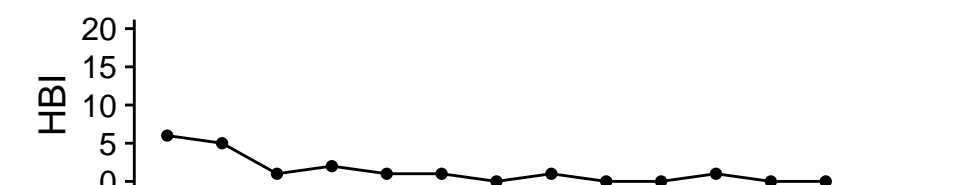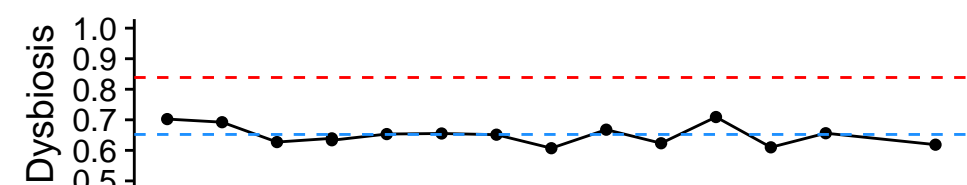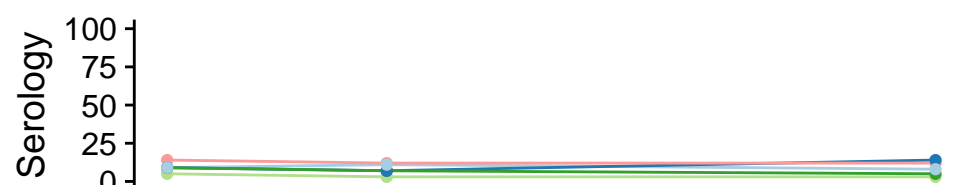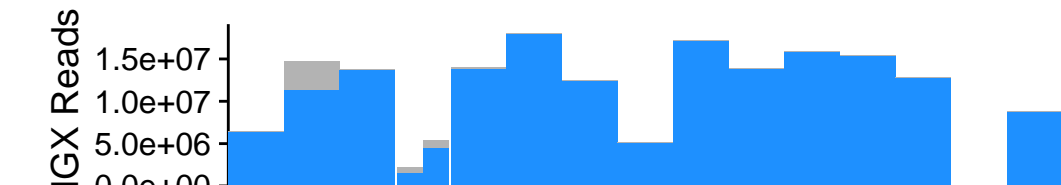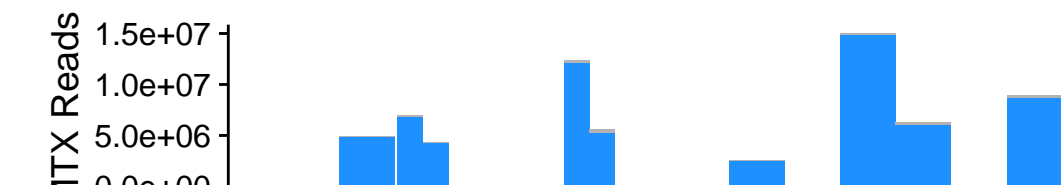

Blank  
None 7+ days  
Within 4-7 days  
Within 2-3 days  
Yesterday 1-2x  
Yesterday 3x+

Yes  
No

Dysbiosis  
Eubiosis

ANCA EU  
Cbir1 EU  
IgA ASCA EU  
IgG ASCA EU  
OmpC. EU

Human  
Filtered

Human  
Filtered

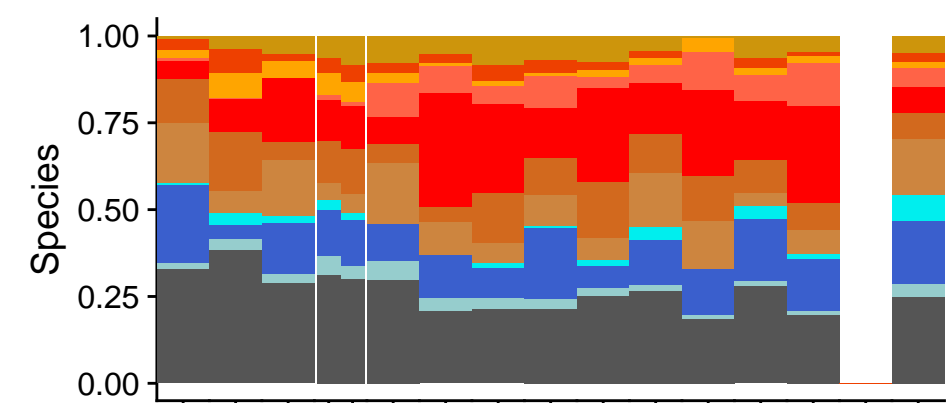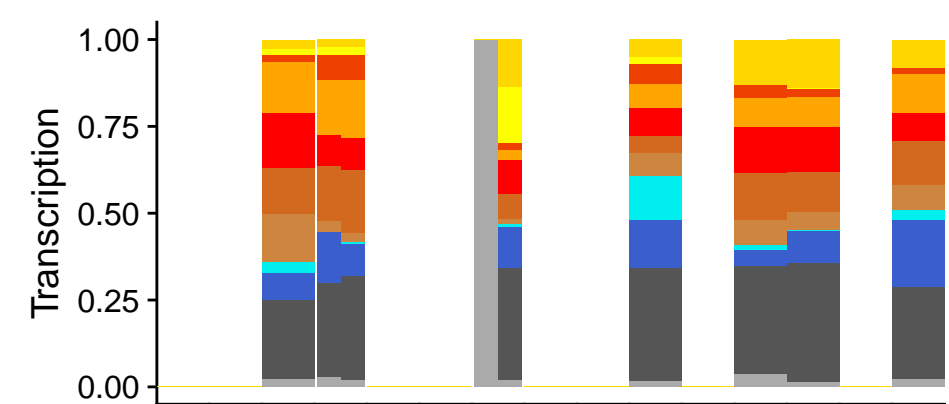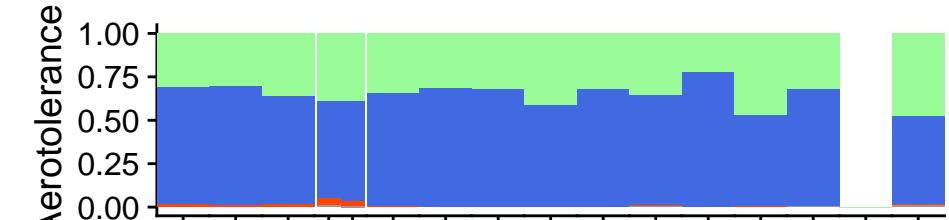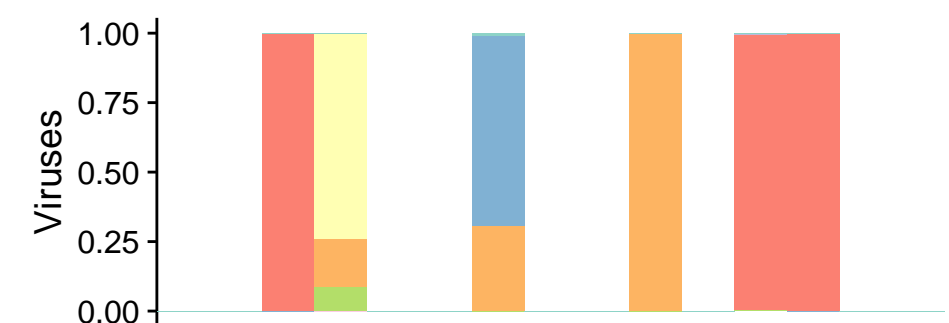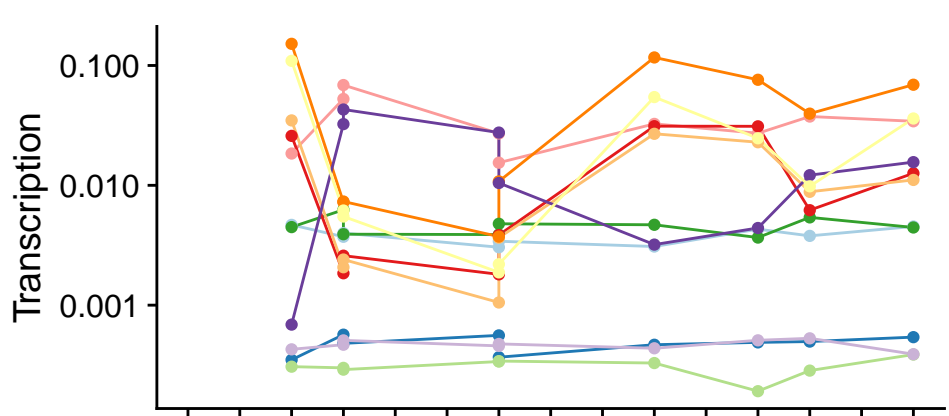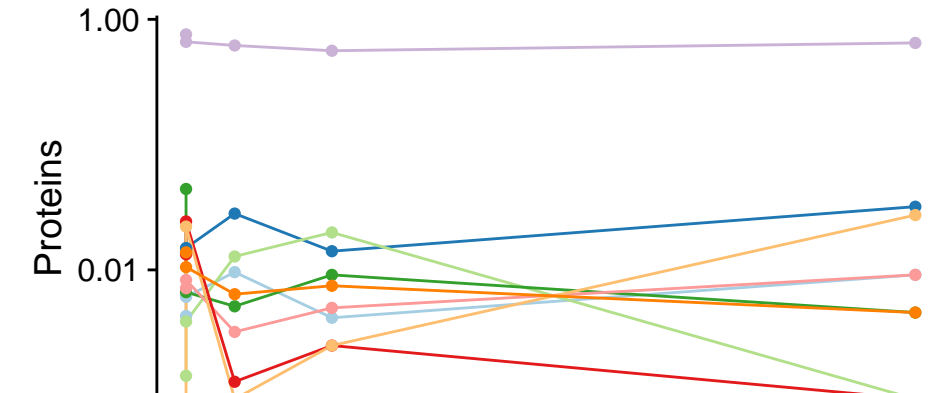

*Alistipes putredinis*  
*Bacteroides caccae*  
*Bacteroides dorei*  
*Bacteroides ovatus*  
*Bacteroides uniformis*  
*Bacteroides vulgatus*  
*Bacteroides massiliensis*  
*Eubacterium rectale*  
*Faecalibacterium prausnitzii*  
*Subdoligranulum unclassified*  
other

*Alistipes onderdonkii*  
*Alistipes shahii*  
*Bacteroides caccae*  
*Bacteroides dorei*  
*Bacteroides uniformis*  
*Bacteroides vulgatus*  
*Bacteroides massiliensis*  
*Eubacterium rectale*  
*Faecalibacterium prausnitzii*  
other  
unclassified

obligate anaerobe  
aerotolerant  
facultative anaerobe  
unknown

T7virus  
Pseudomonas phage PPpW-4  
unclassified Siphoviridae  
Gokushovirus WZ-2015a  
Bell pepper mottle virus  
Pepper mild mottle virus  
Tobacco mild green mosaic virus  
Tomato mosaic virus  
other

K00850: 6-phosphofructokinase 1 [EC:2.7.1....  
K01647: citrate synthase [EC:2.3.3.1]  
K01928: UDP-N-acetylmuramoyl-L-alanyl-...  
K02888: large subunit ribosomal protein L21  
K03088: RNA polymerase sigma-70 factor, E...  
K03686: molecular chaperone DnaJ  
K04077: chaperonin GroEL  
K04078: chaperonin GroES  
K06178: ribosomal large subunit pseudouridi...  
K12343: 3-oxo-5-alpha-steroid 4-dehydrog...  
K13993: HSP20 family protein

K00134: glyceraldehyde 3-phosphate dehydr...  
K00262: glutamate dehydrogenase (NADP+) ...  
K01006: pyruvate, orthophosphate dikinase [...  
K01610: phosphoenolpyruvate carboxykinase...  
K01803: triosephosphate isomerase (TIM) [E...  
K10117: raffinose/stachyose/melibiose transp...  
K10192: oligogalacturonide transport syst...  
K10200: N-acetylglucosamine transport syst...  
UNGROUPED

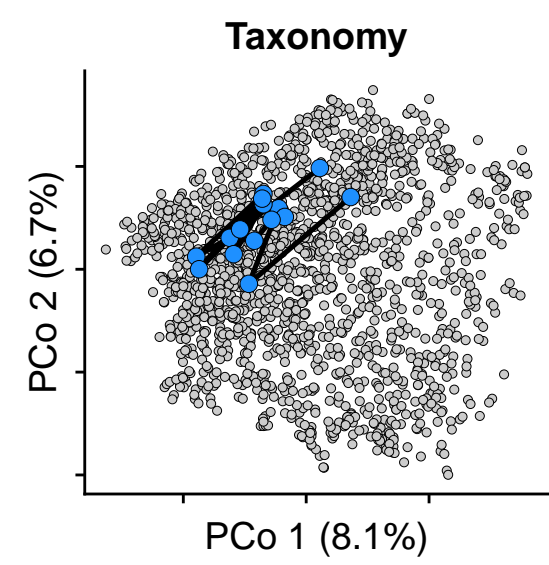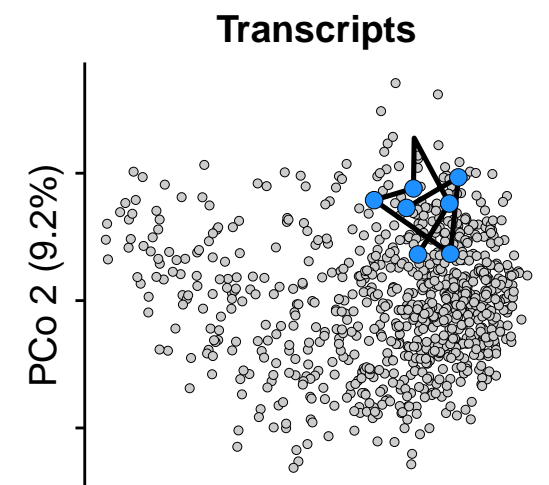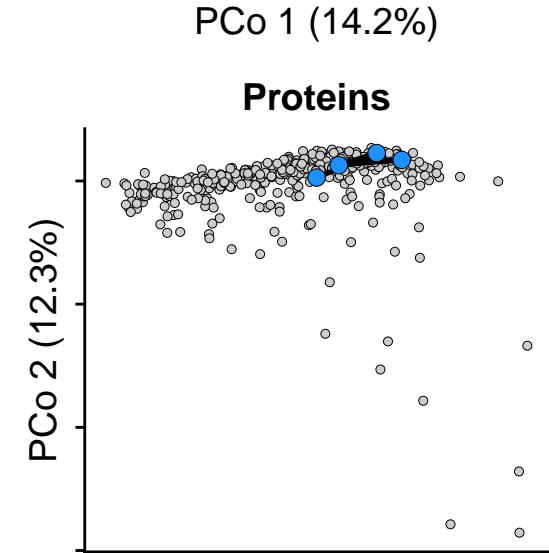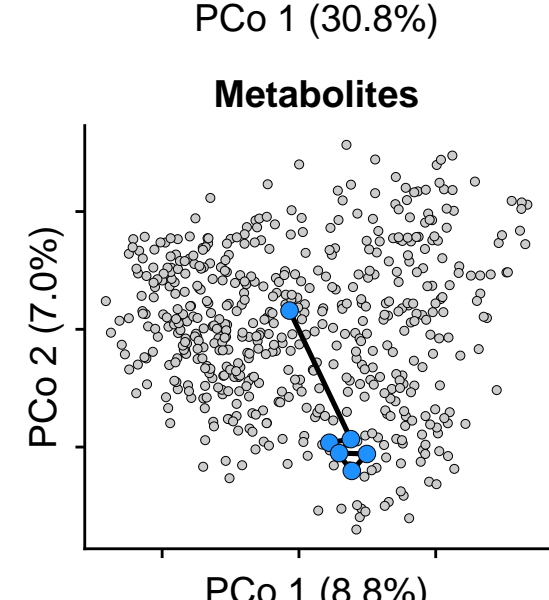

P6009: 16 Male White MGH Pediatrics | CD L2

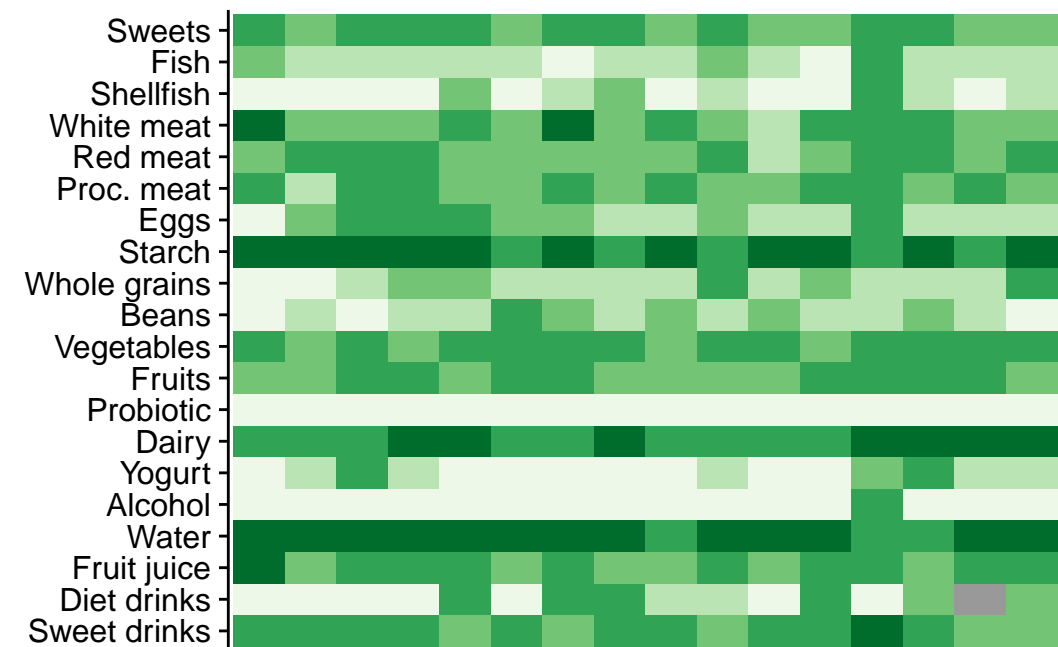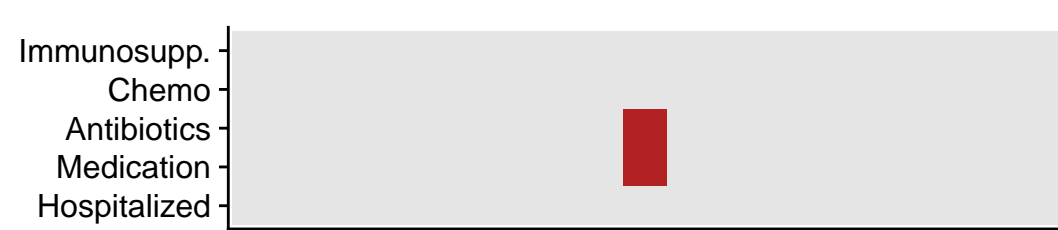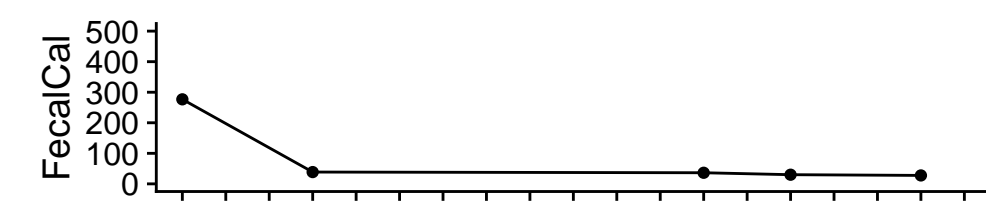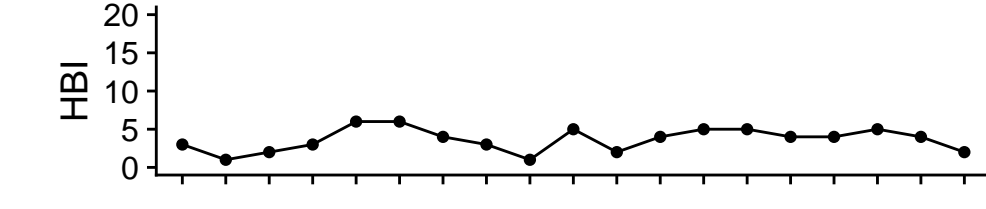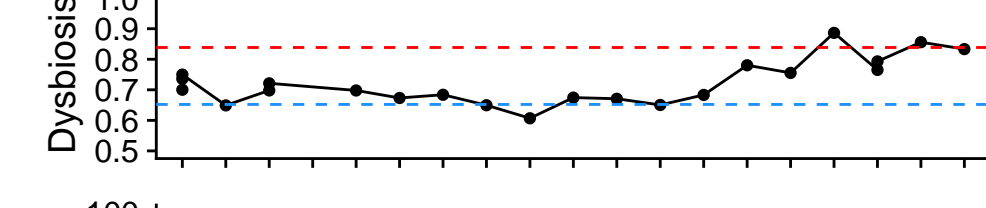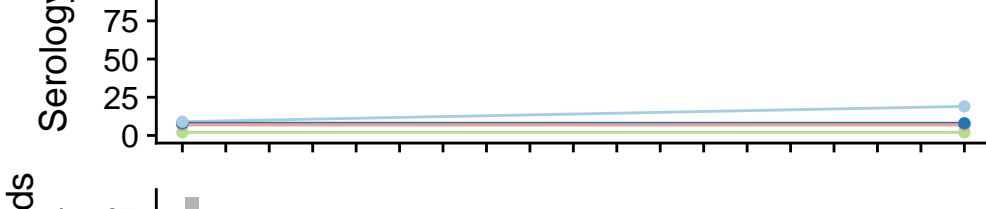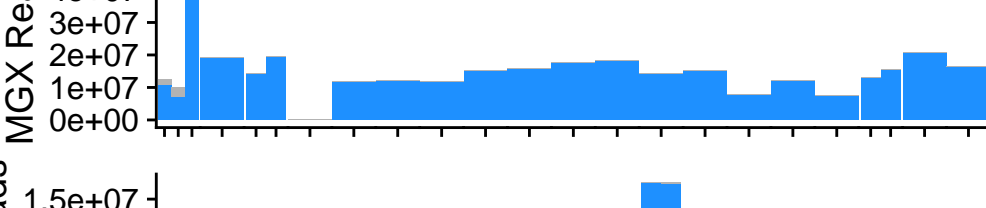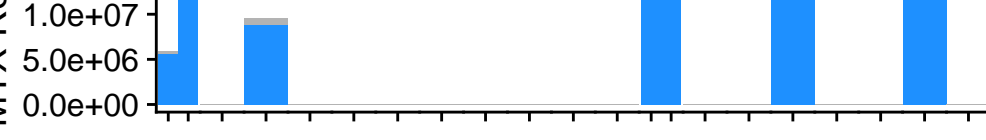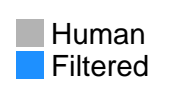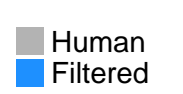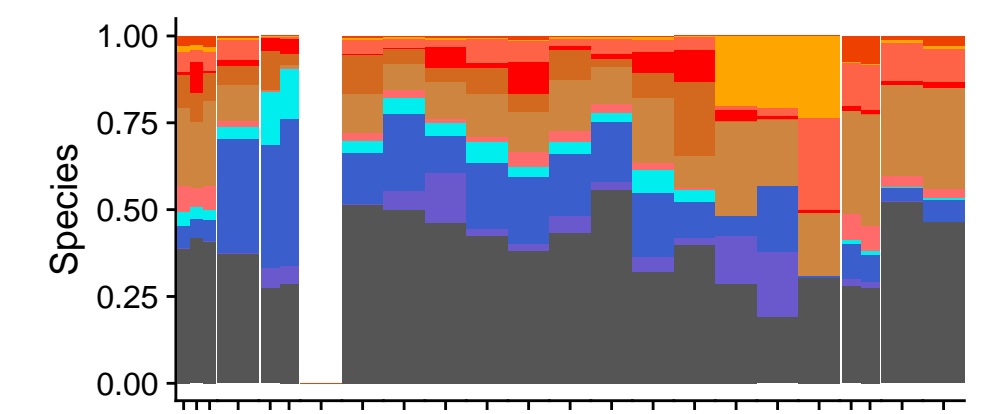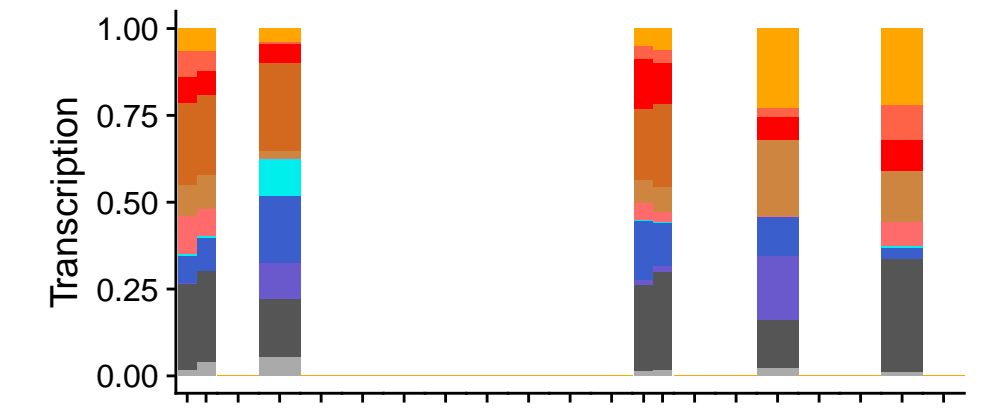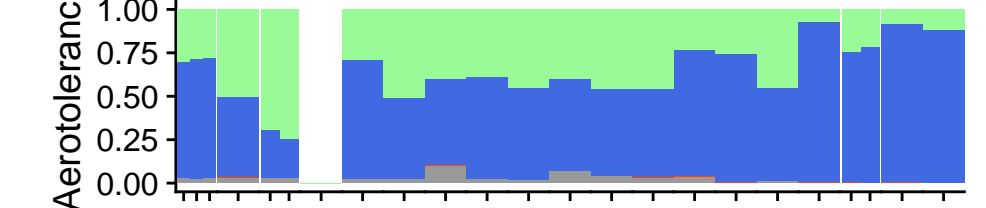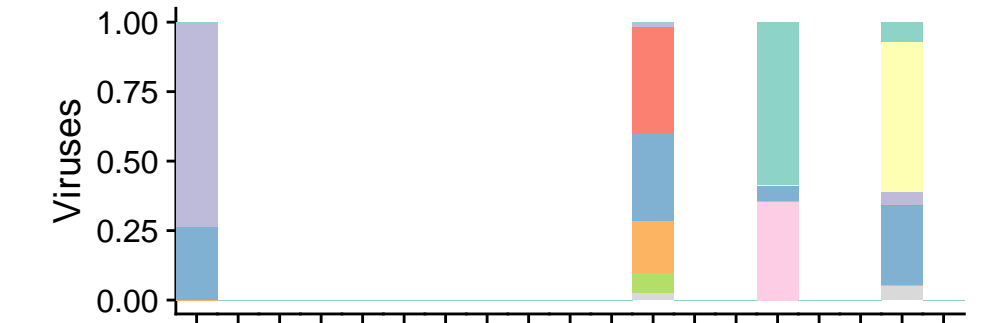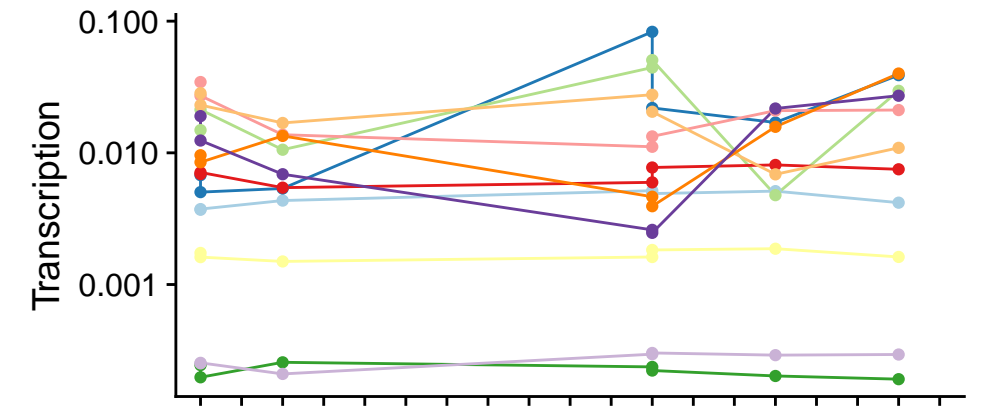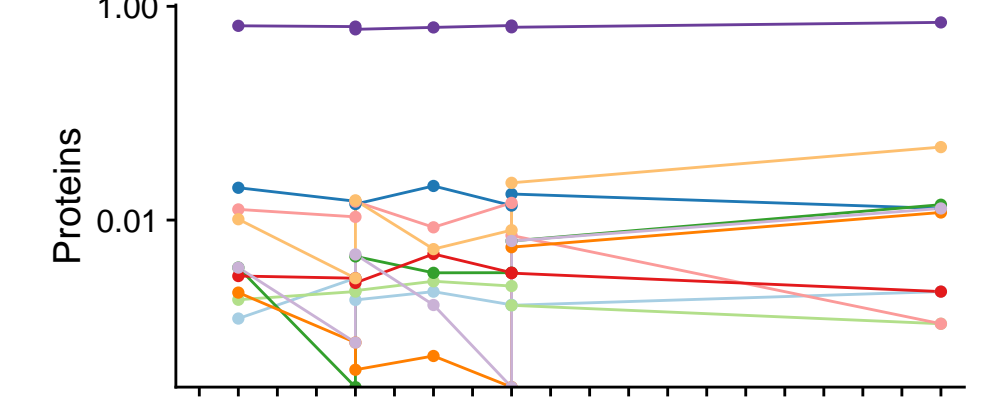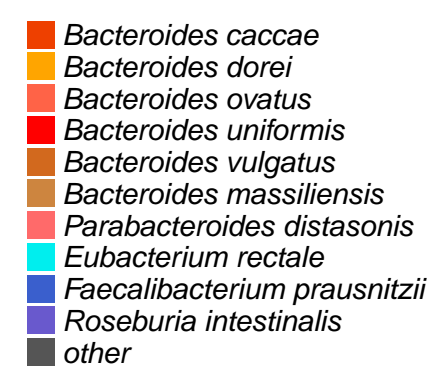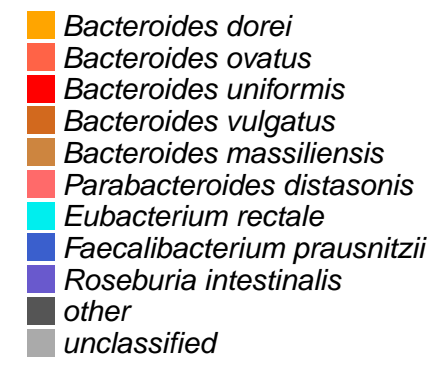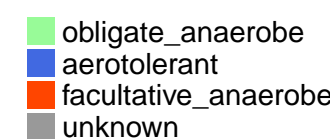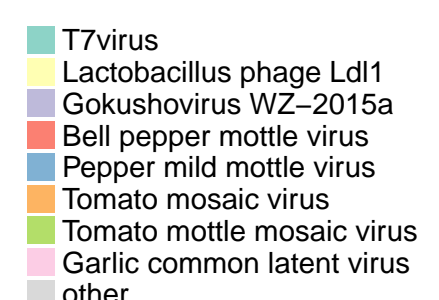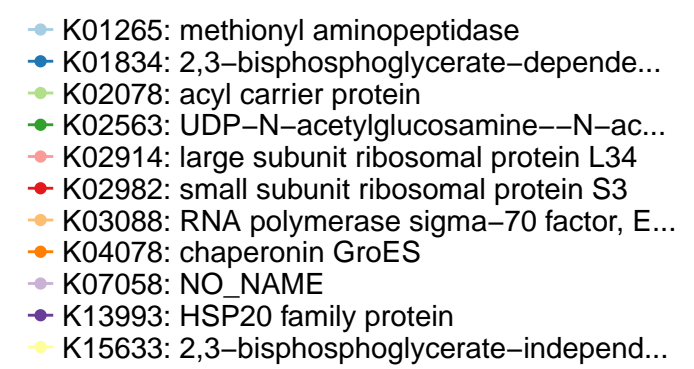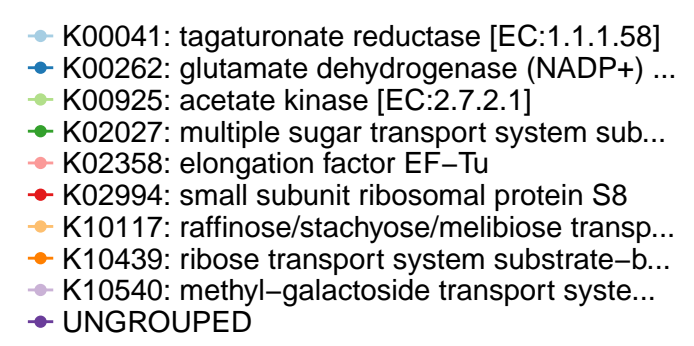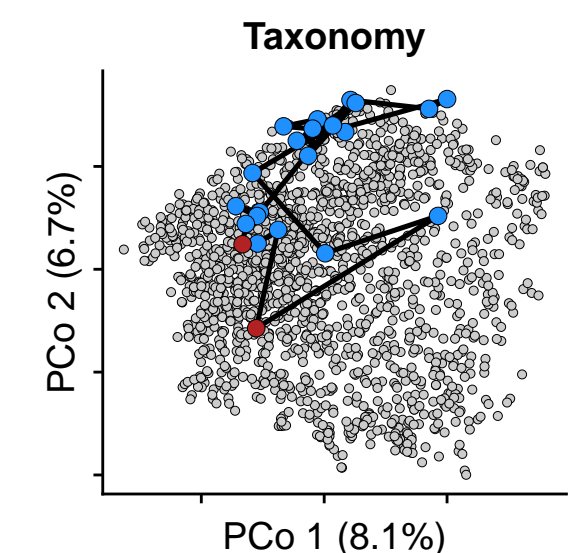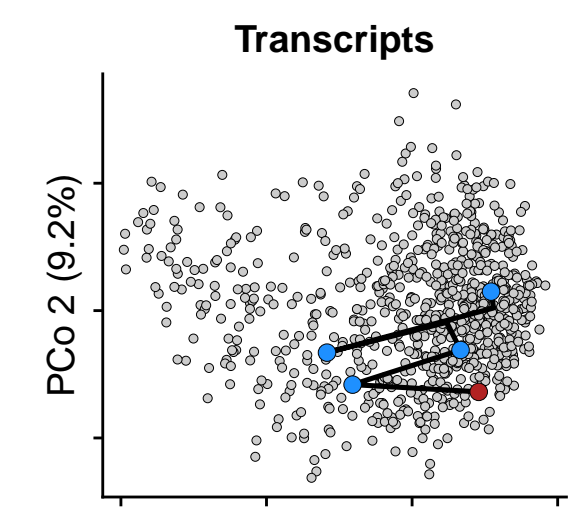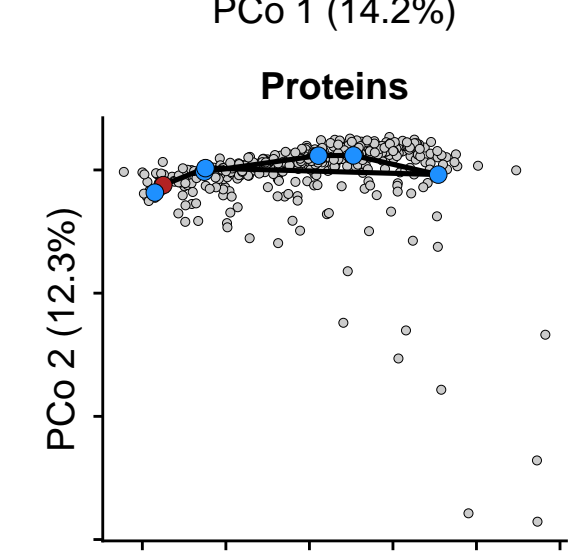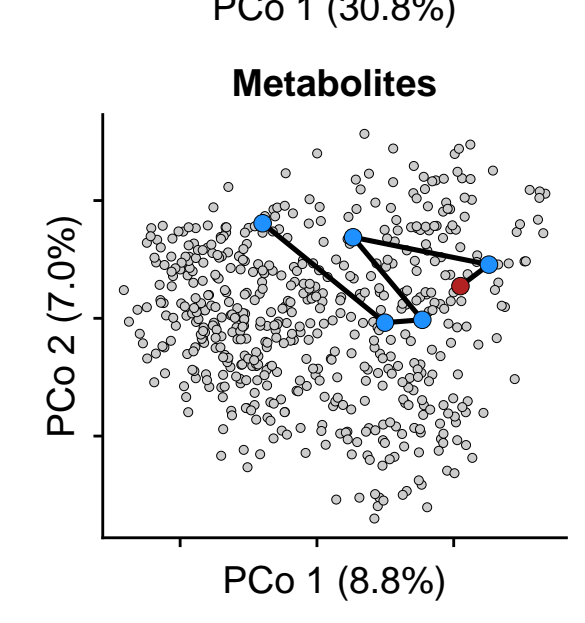

P6010: 10 Male White MGH Pediatrics | CD L3+L4

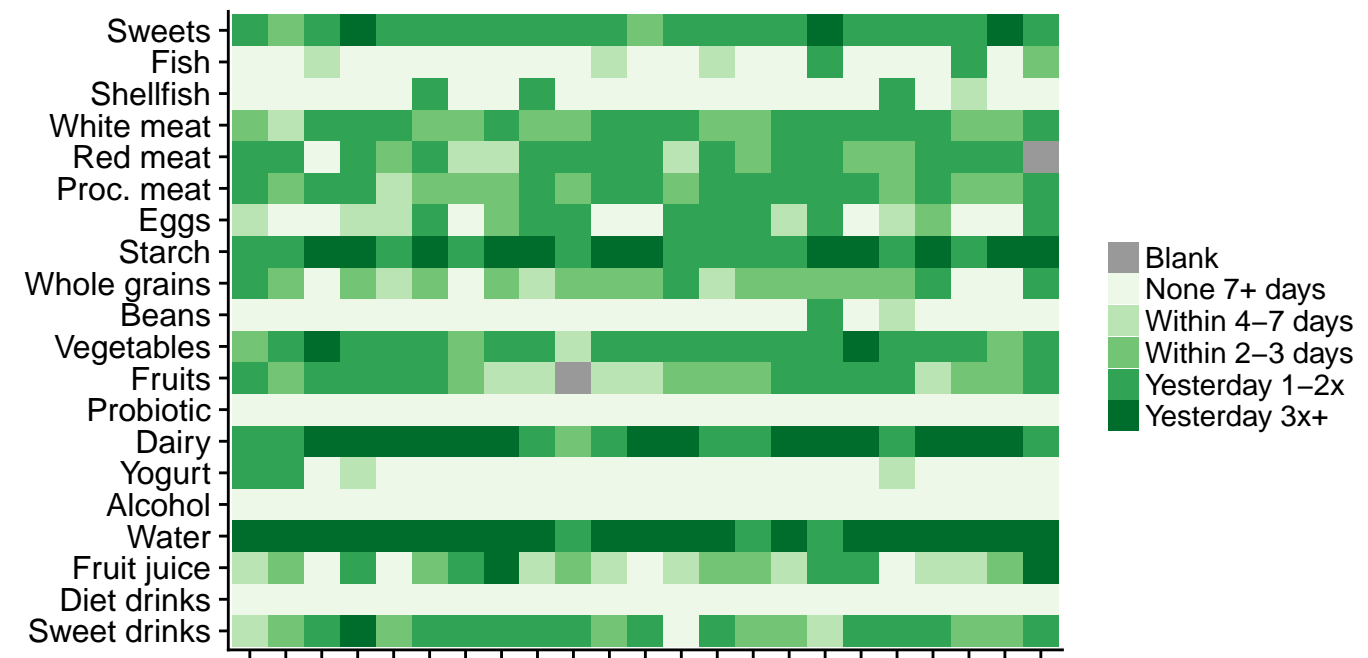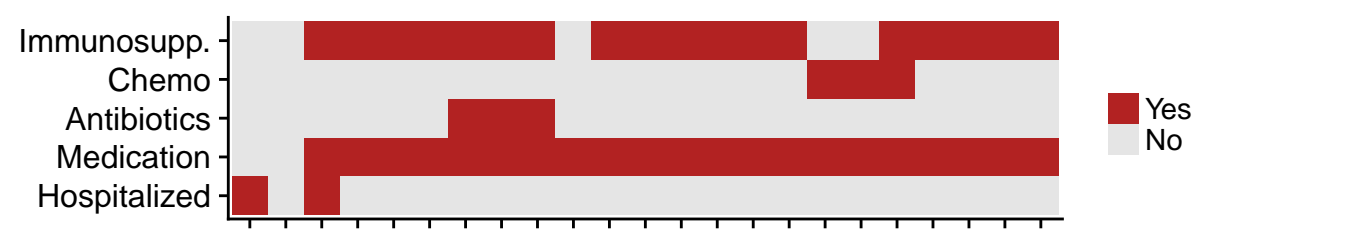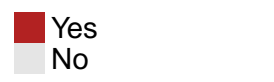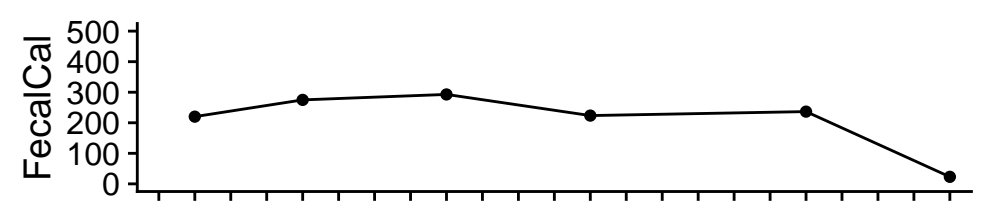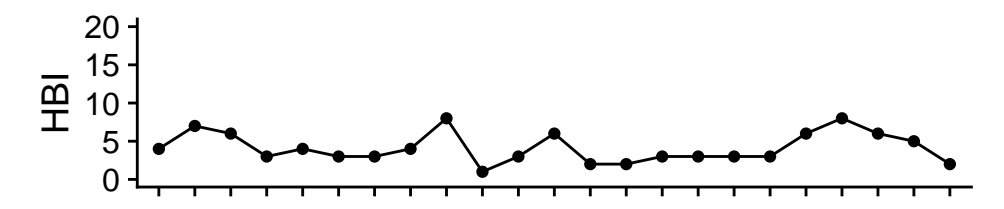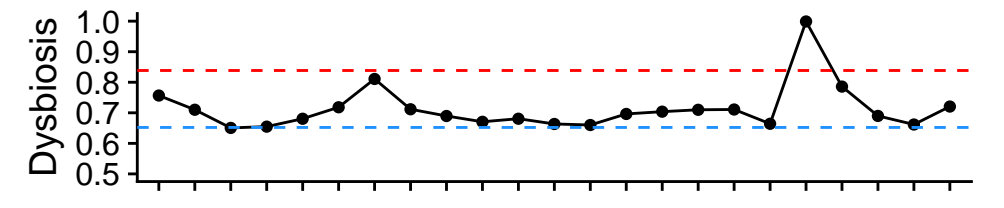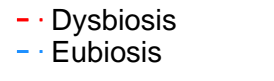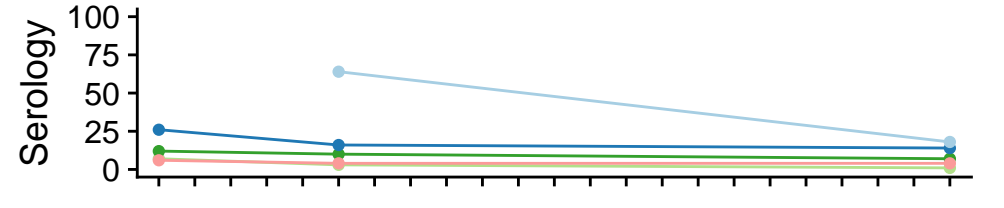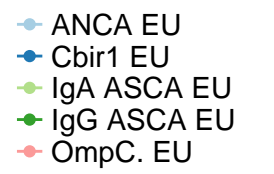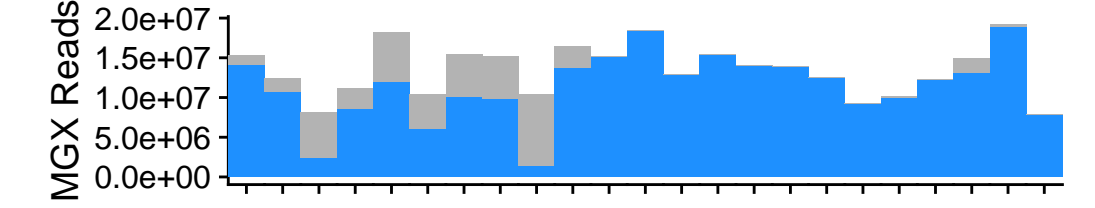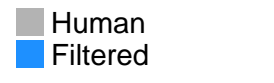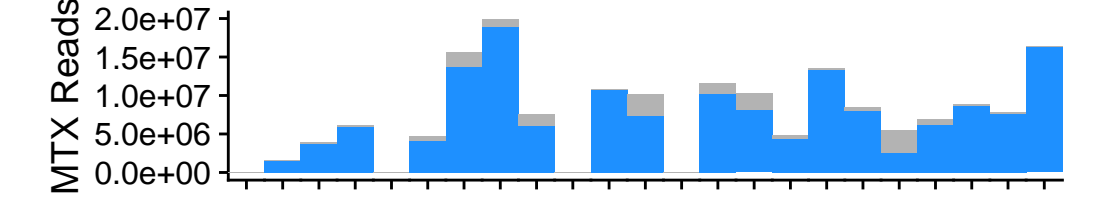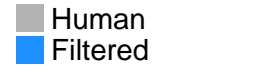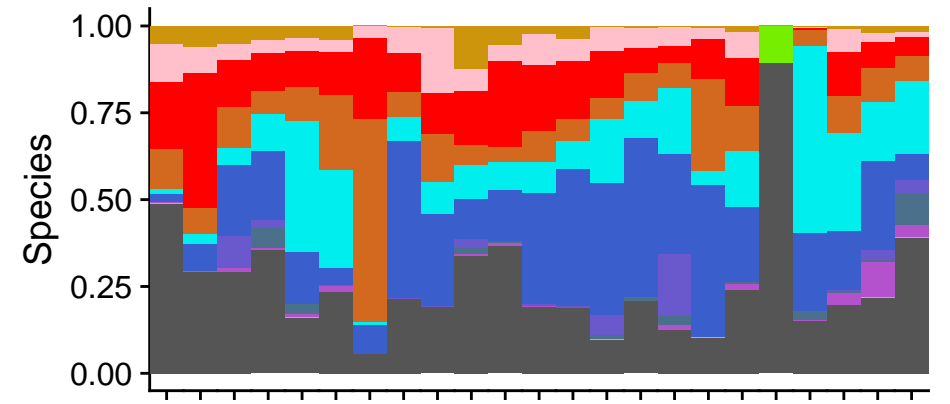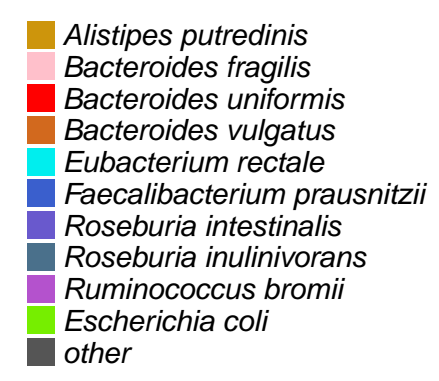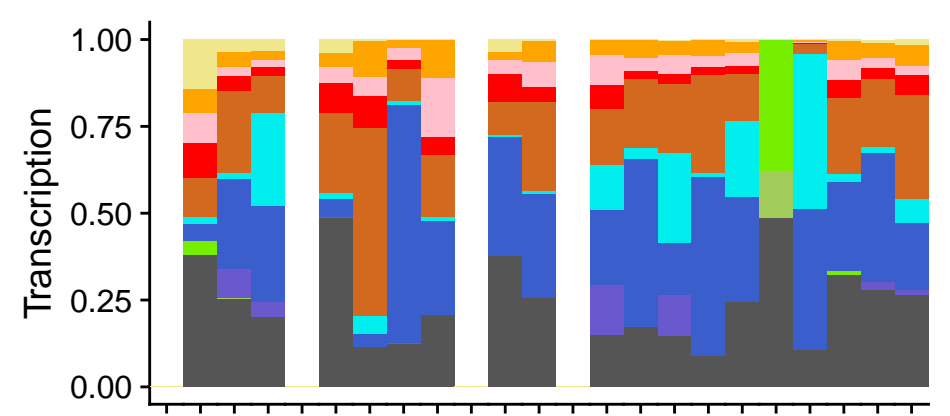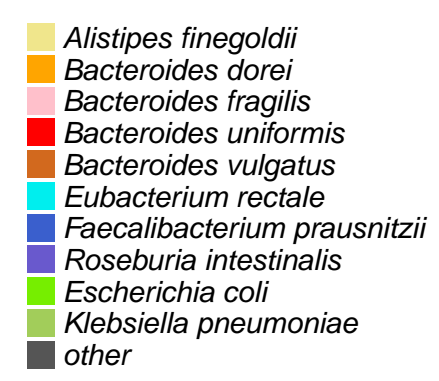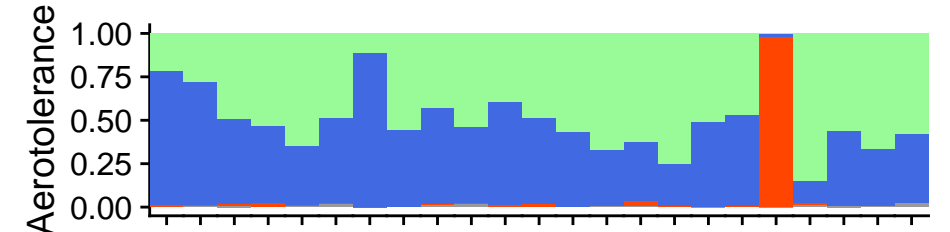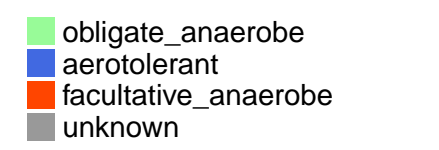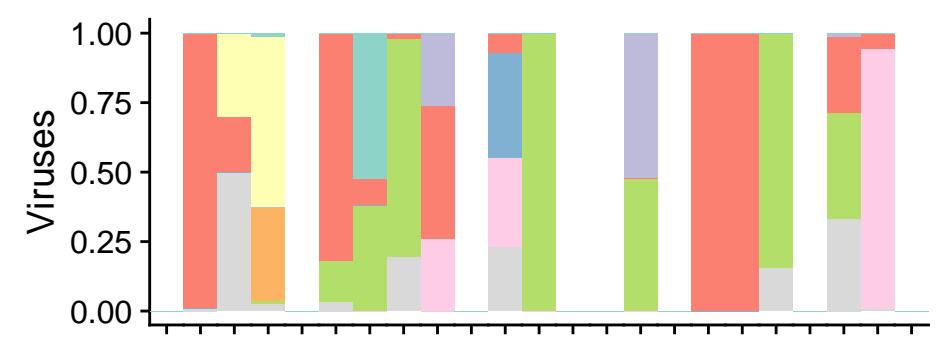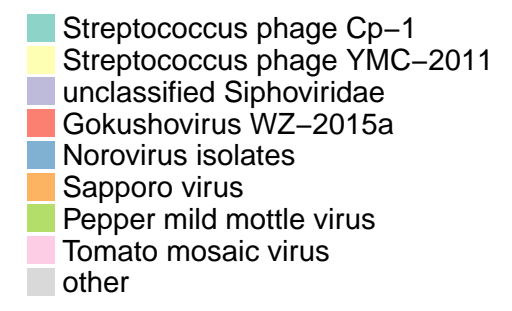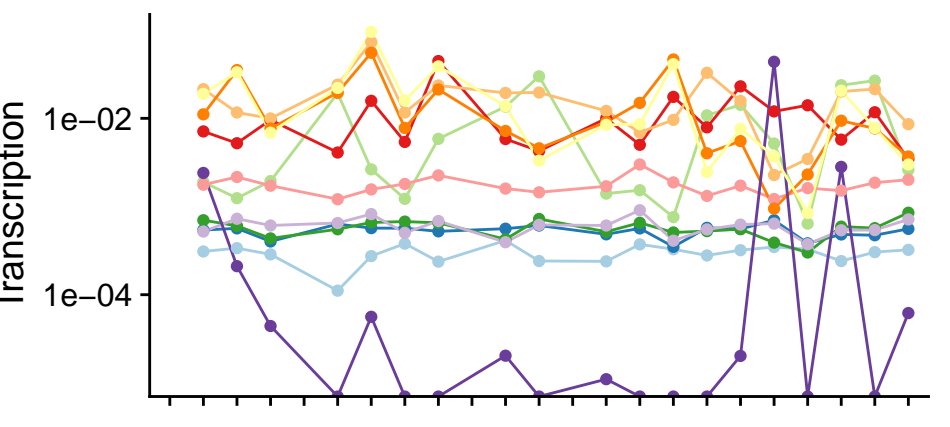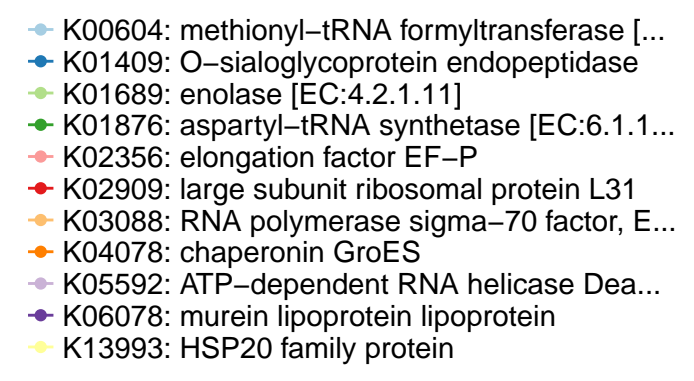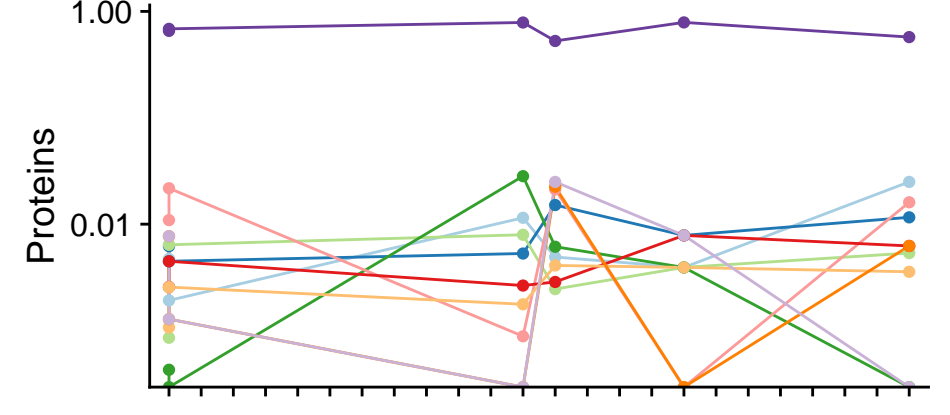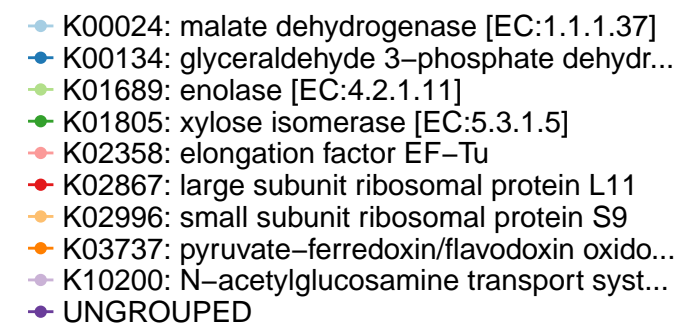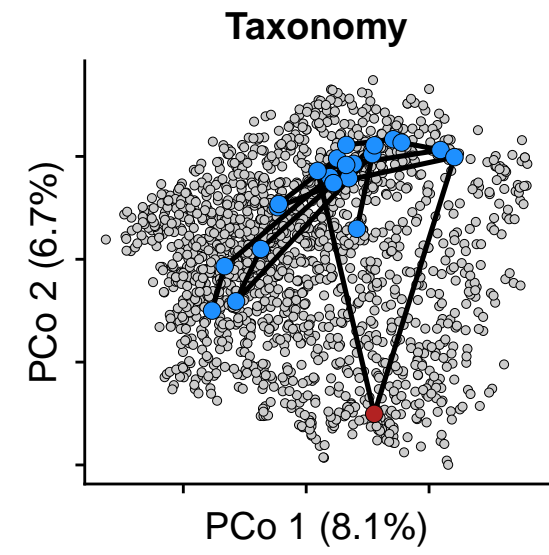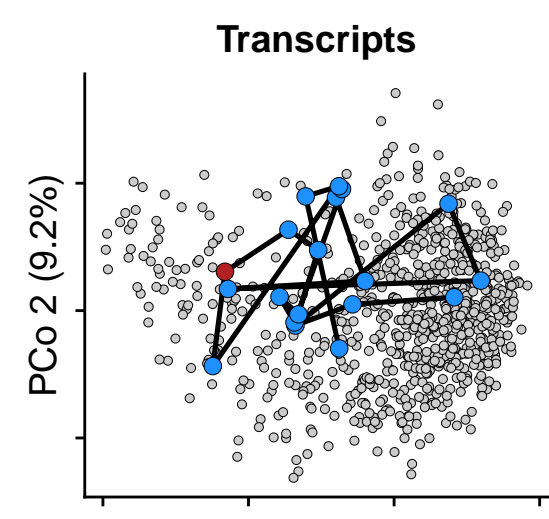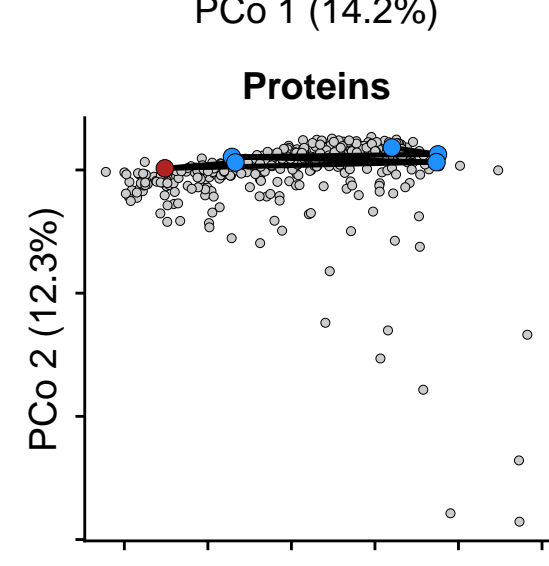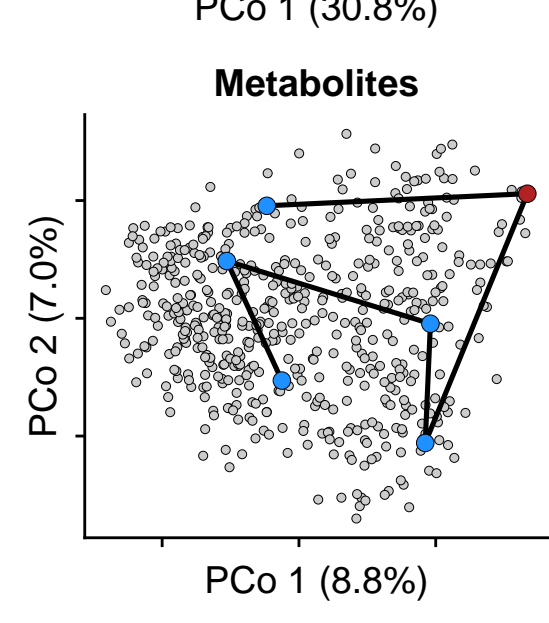

P6012: 16 Female White MGH Pediatrics | UC

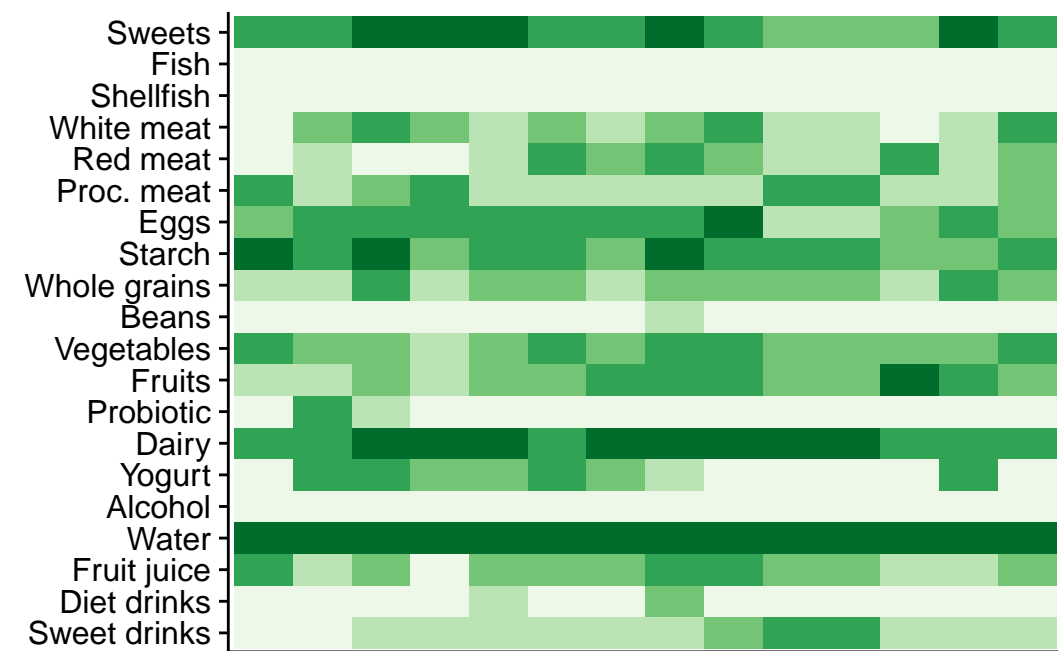

None 7+ days  
Within 4-7 days  
Within 2-3 days  
Yesterday 1-2x  
Yesterday 3x+

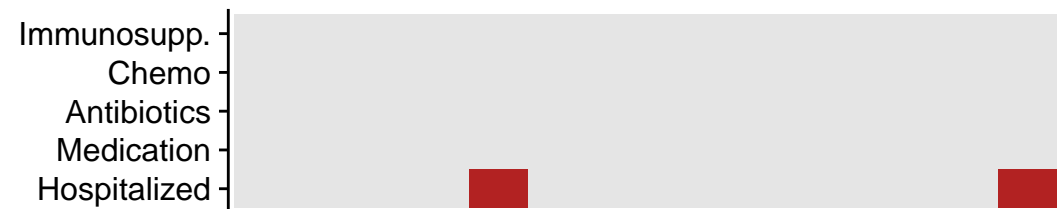

Yes  
No

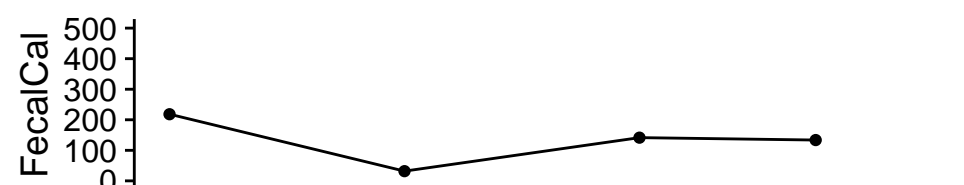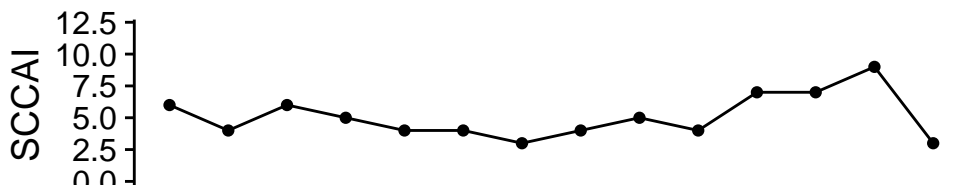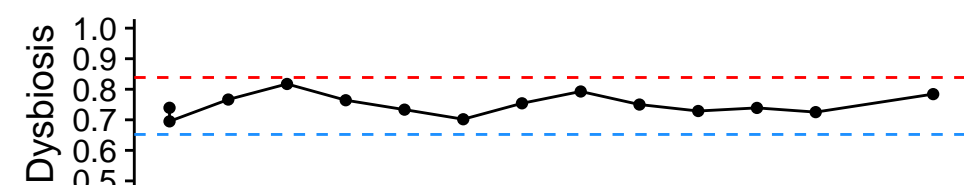

Dysbiosis  
Eubiosis

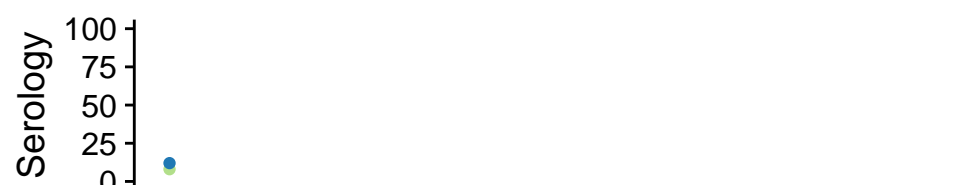

ANCA EU  
Cbir1 EU  
OmpC. EU

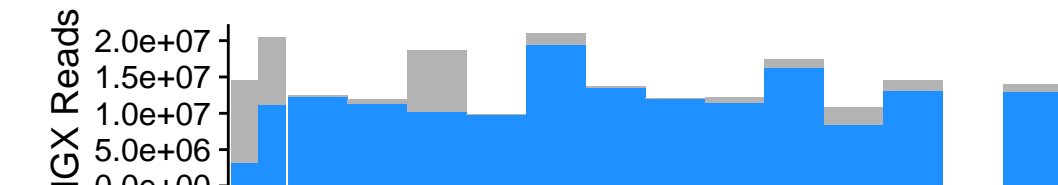

Human  
Filtered

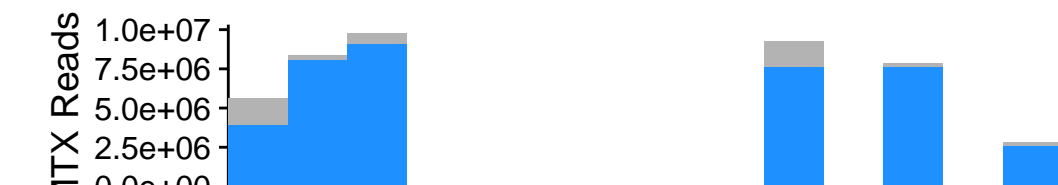

Human  
Filtered

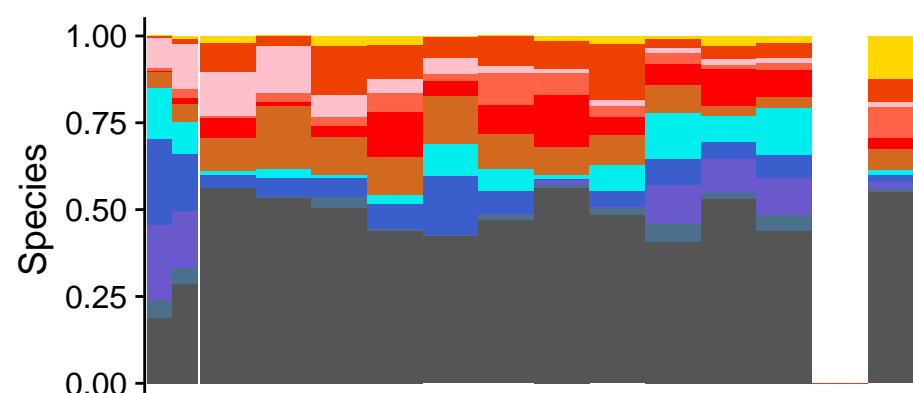

*Alistipes onderdonkii*  
*Bacteroides caccae*  
*Bacteroides fragilis*  
*Bacteroides ovatus*  
*Bacteroides uniformis*  
*Bacteroides vulgatus*  
*Eubacterium rectale*  
*Faecalibacterium prausnitzii*  
*Roseburia intestinalis*  
*Roseburia inulinivorans*  
other

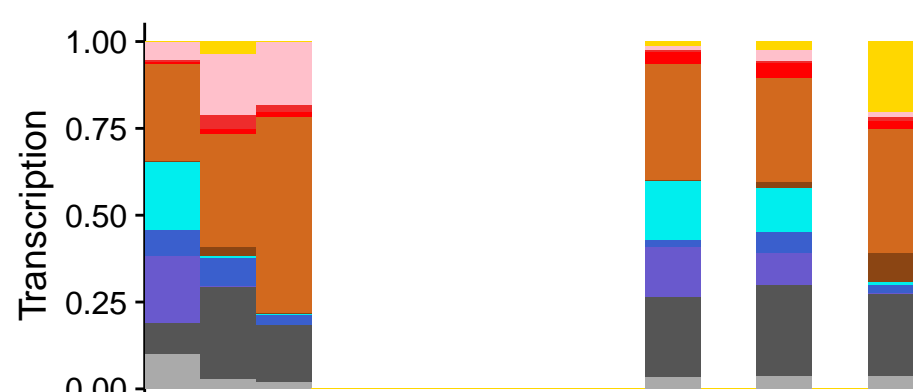

*Alistipes onderdonkii*  
*Bacteroides fragilis*  
*Bacteroides thetaiotaomicron*  
*Bacteroides uniformis*  
*Bacteroides vulgatus*  
*Odoribacter splanchnicus*  
*Eubacterium rectale*  
*Faecalibacterium prausnitzii*  
*Roseburia intestinalis*  
other  
unclassified

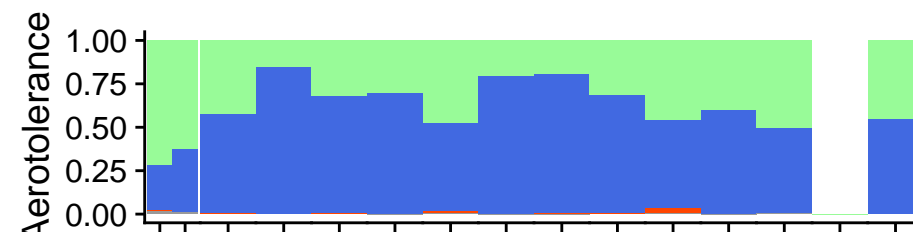

obligate anaerobe  
aerotolerant  
facultative anaerobe  
unknown

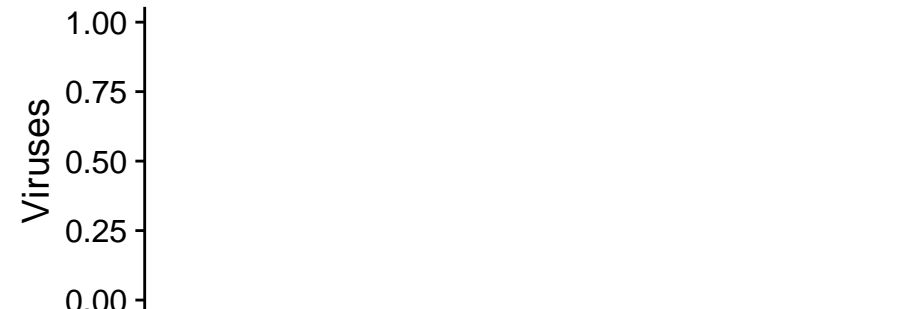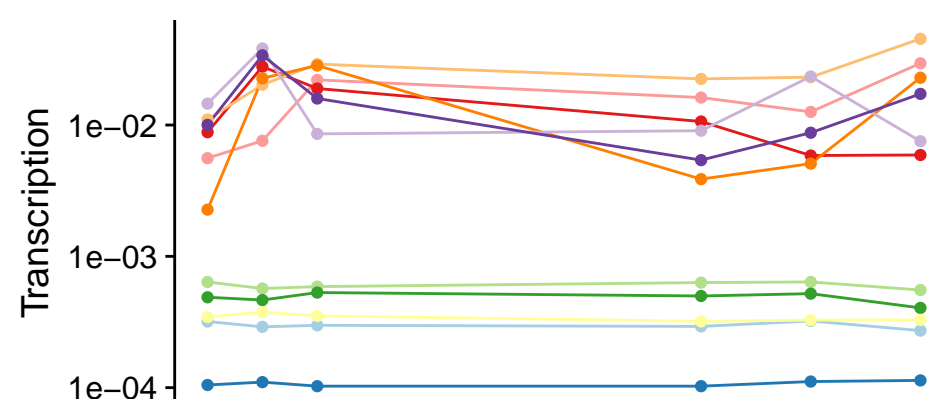

K00651: homoserine O-succinyltransferase [...]  
K00688: starch phosphorylase [EC:2.4.1.1]  
K00873: pyruvate kinase [EC:2.7.1.40]  
K00973: glucose-1-phosphate thymidyltra...  
K02078: acyl carrier protein  
K02909: large subunit ribosomal protein L31  
K02914: large subunit ribosomal protein L34  
K03088: RNA polymerase sigma-70 factor, E...  
K04078: chaperonin GroES  
K13993: HSP20 family protein  
K17828: dihydroorotate dehydrogenase (NA...)

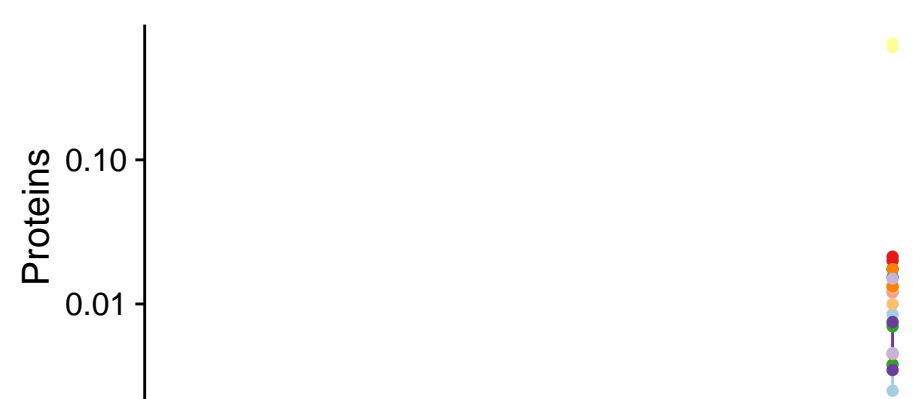

K00041: tagaturonate reductase [EC:1.1.1.58]  
K00262: glutamate dehydrogenase (NADP+) ...  
K01006: pyruvate, orthophosphate dikinase [...]  
K01805: xylose isomerase [EC:5.3.1.5]  
K02355: elongation factor EF-G  
K02358: elongation factor EF-Tu  
K04043: molecular chaperone DnaK  
K04077: chaperonin GroEL  
K10117: raffinose/stachyose/melibiose transp...  
K10200: N-acetylglucosamine transport syst...  
UNGROUPED

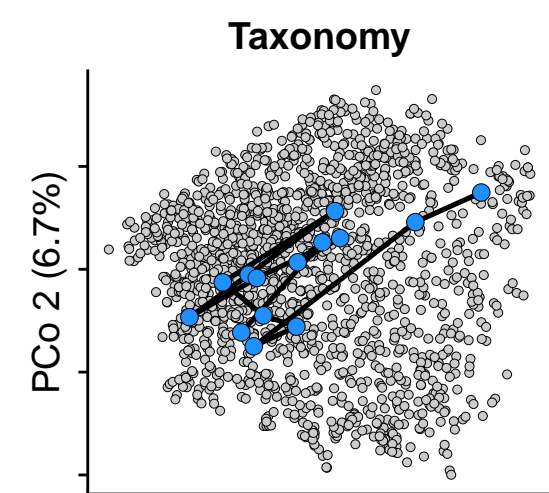

Taxonomy

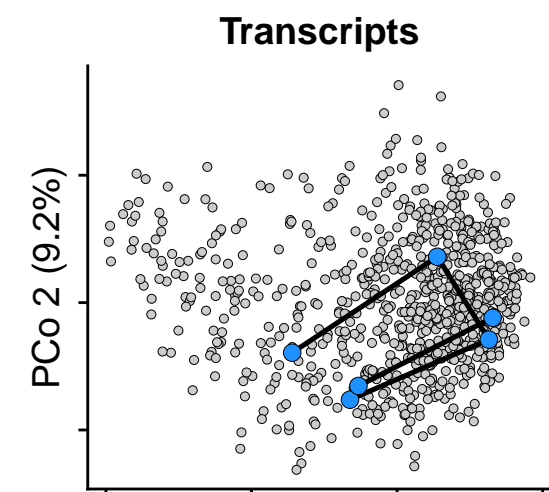

Transcripts

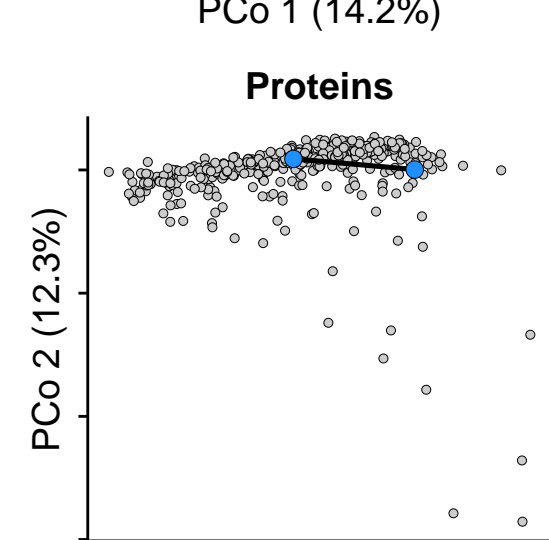

Proteins

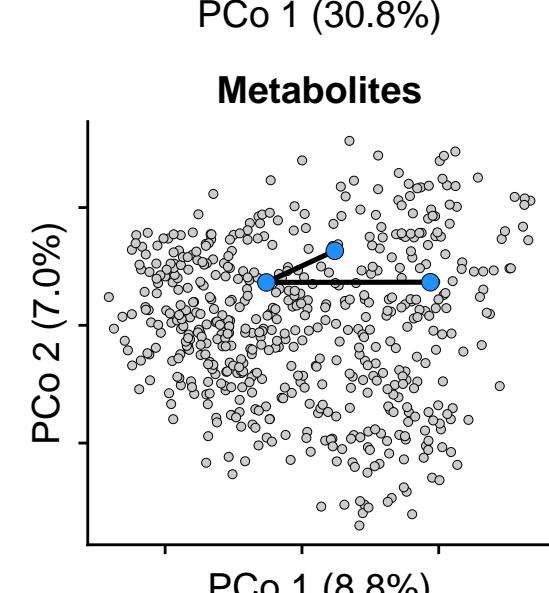

Metabolites

P6013: 6 Male White MGH Pediatrics | UC

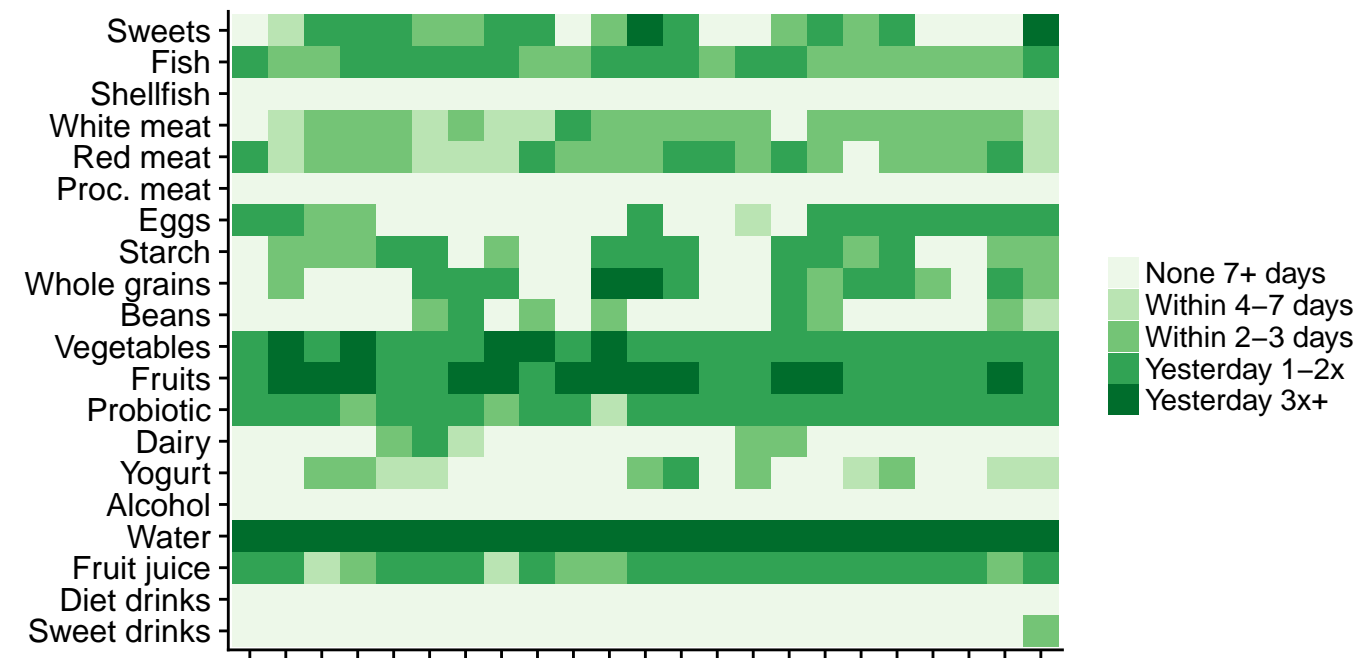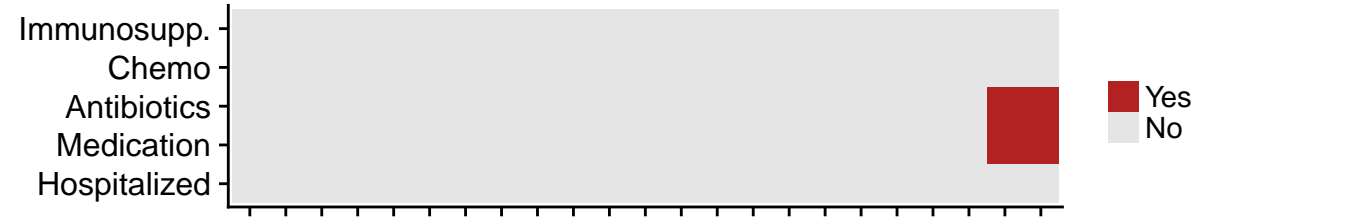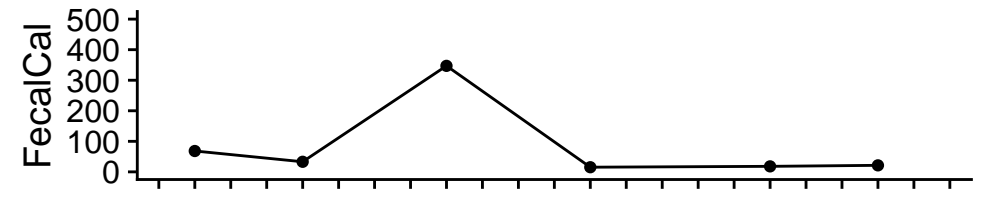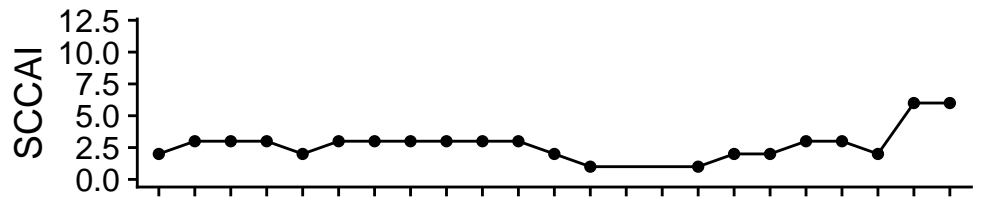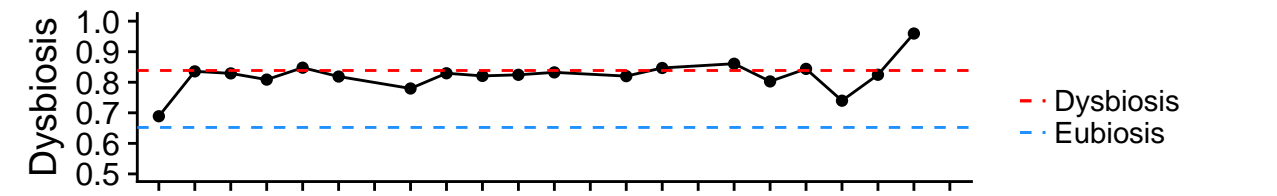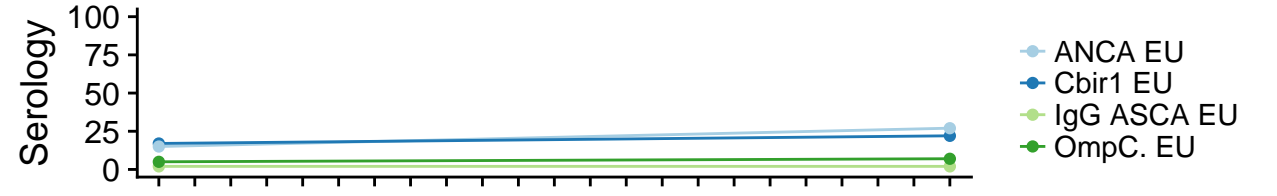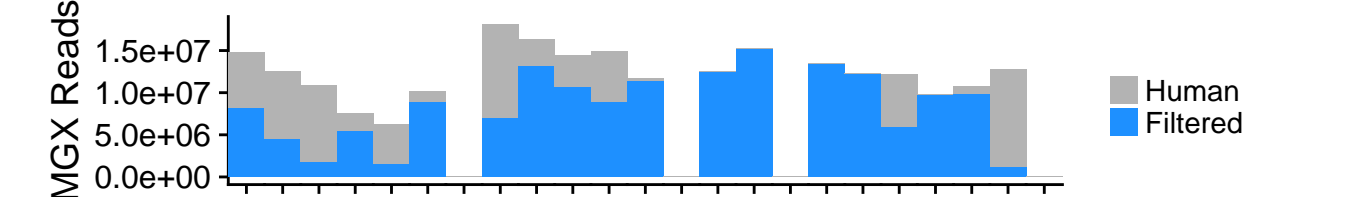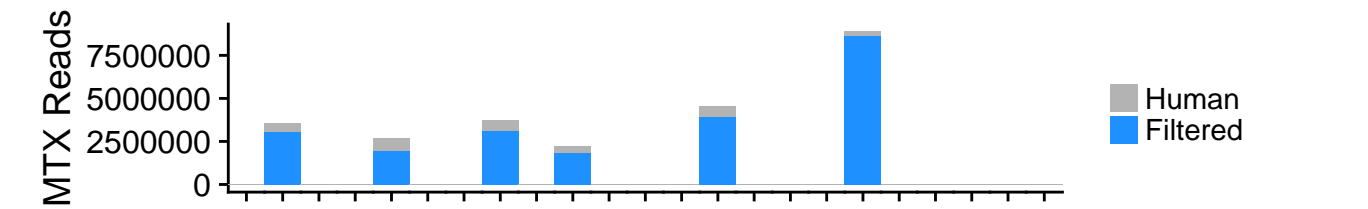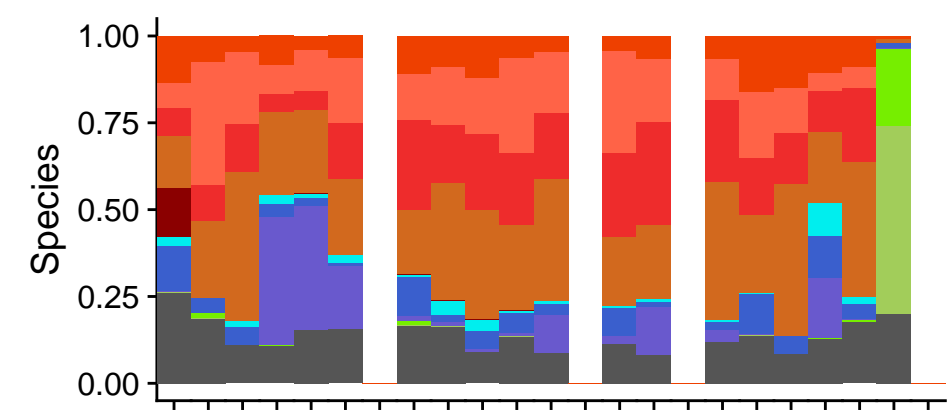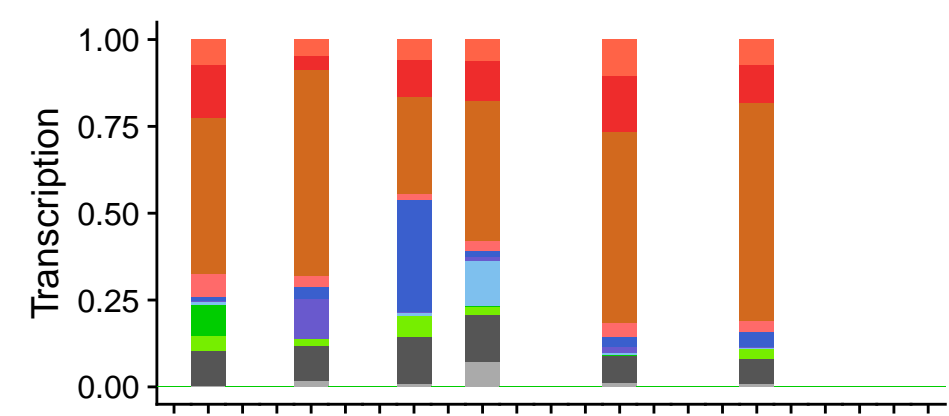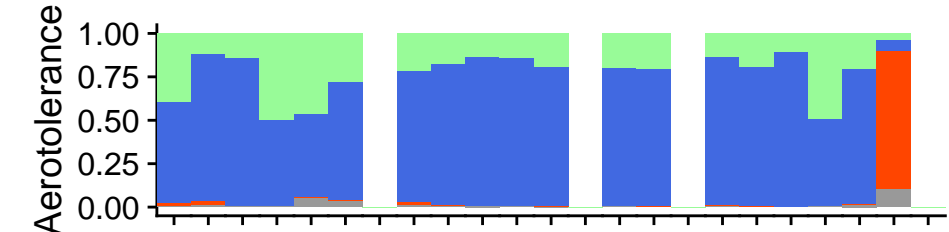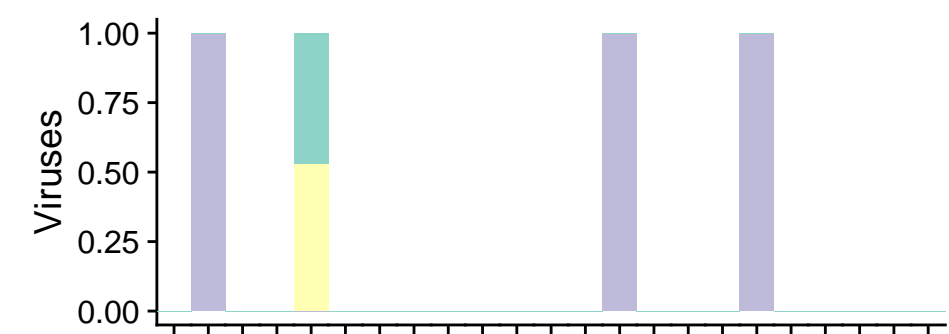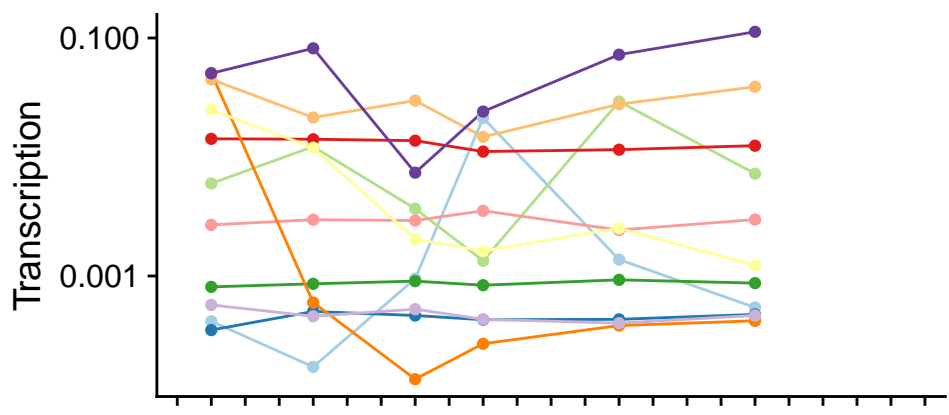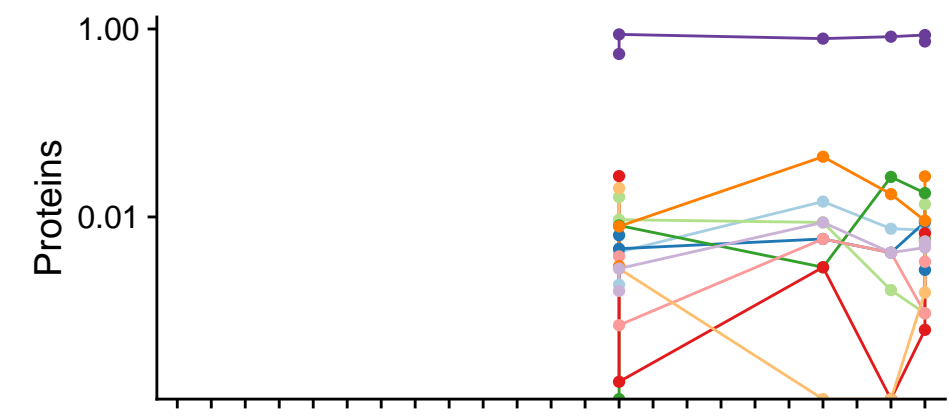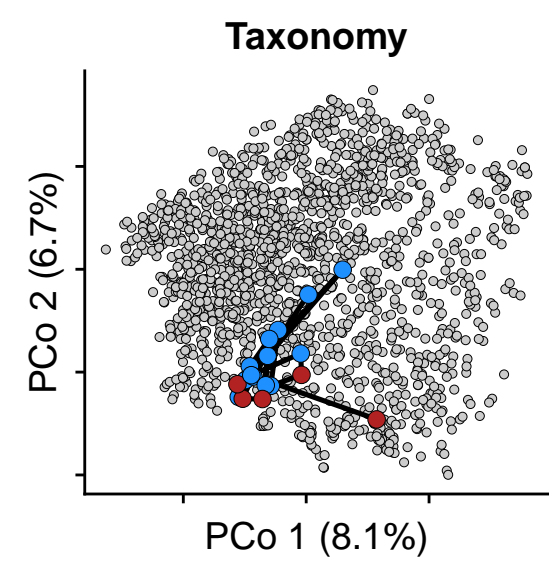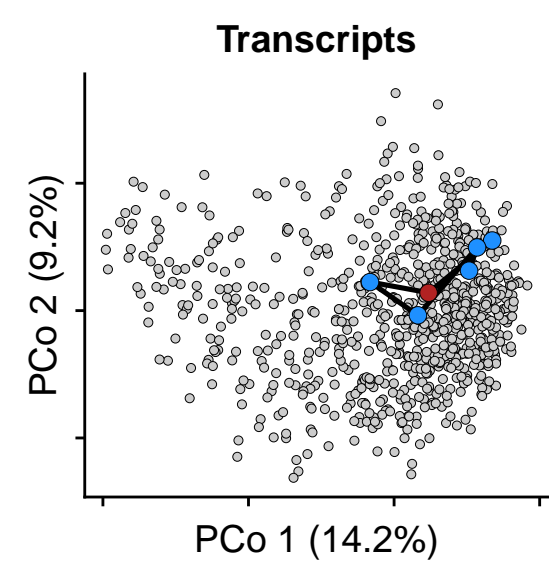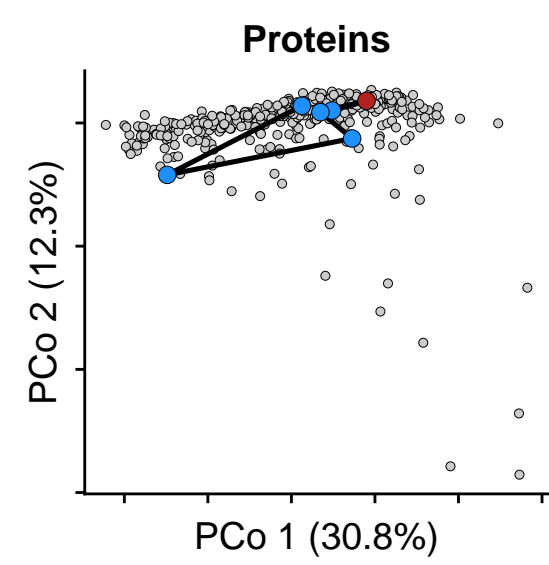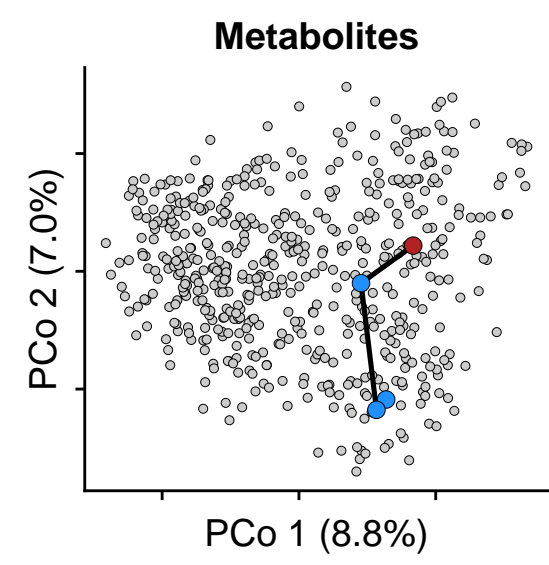

P6014: 15 Male White MGH Pediatrics | nonIBD

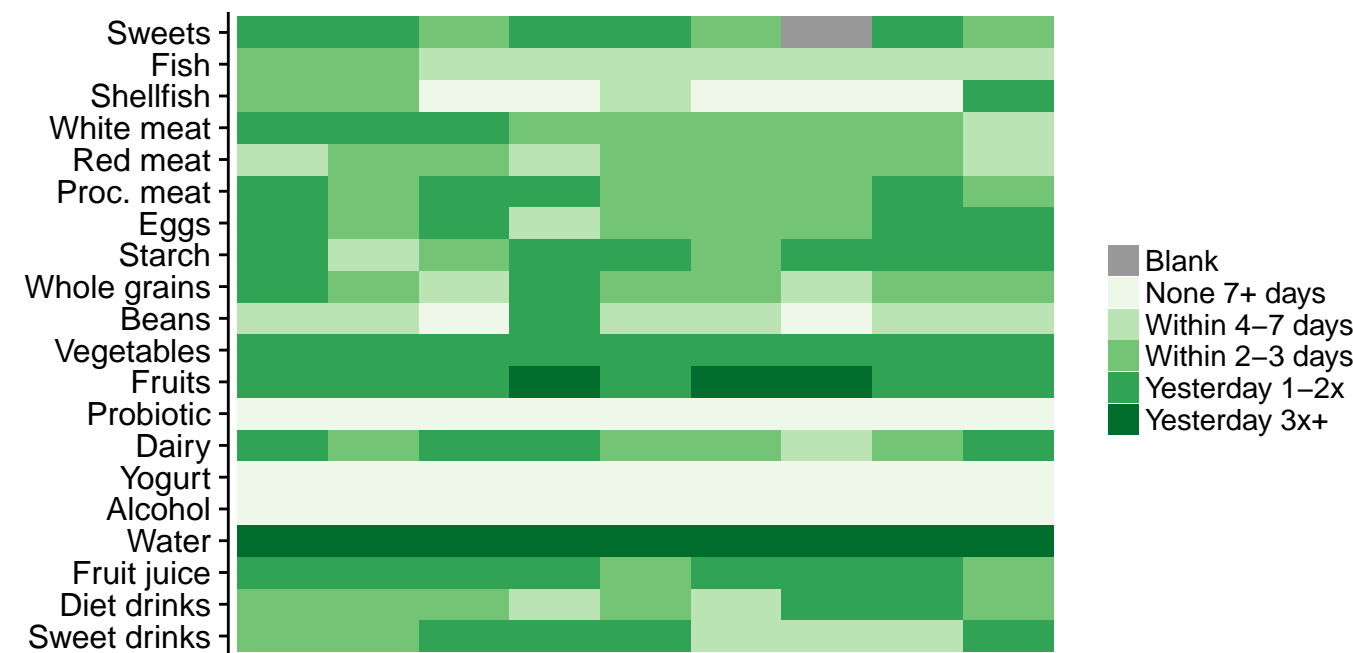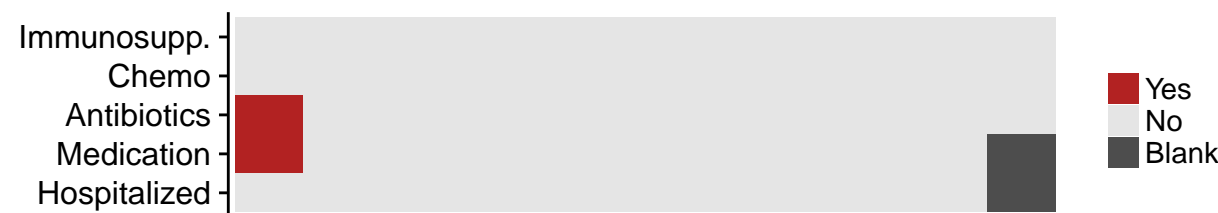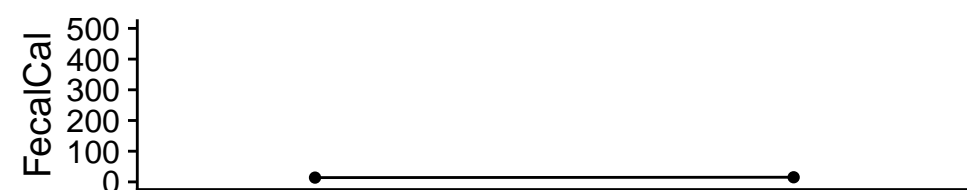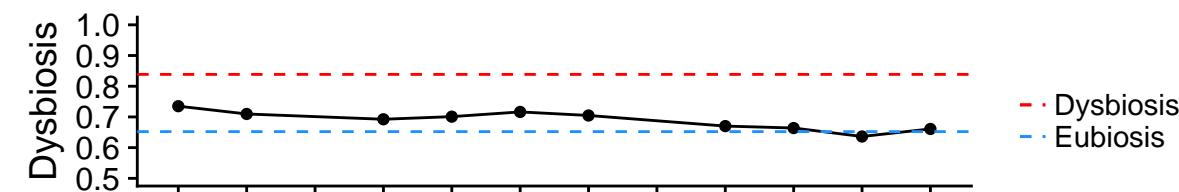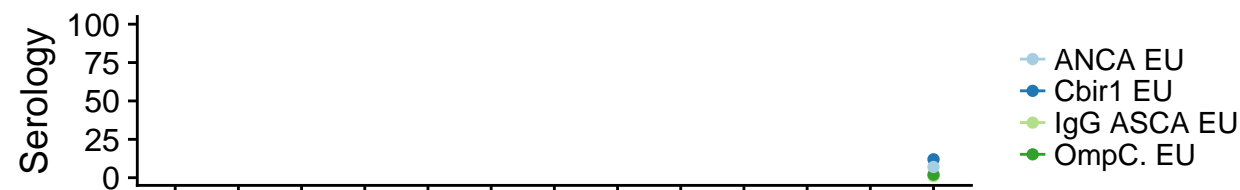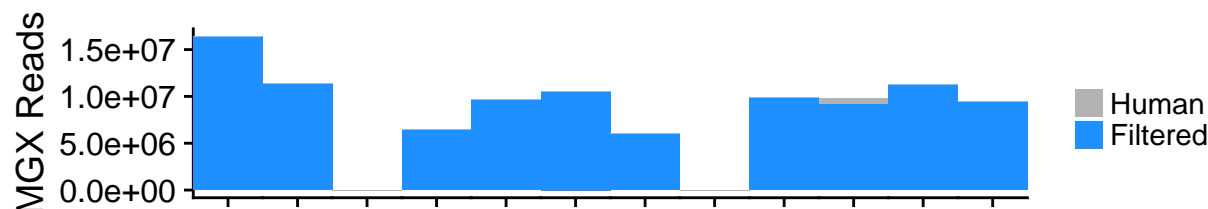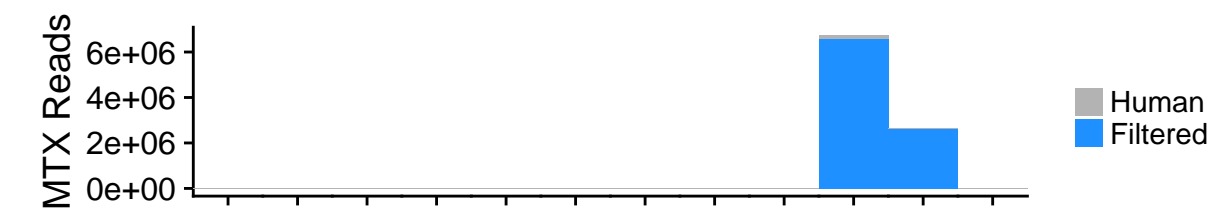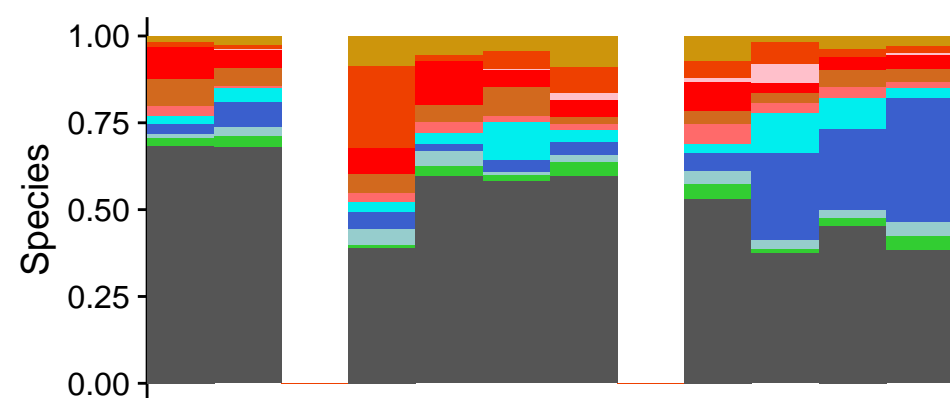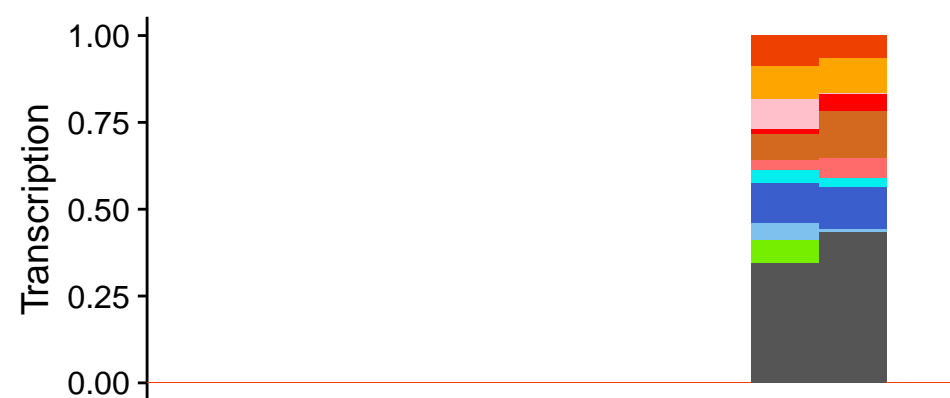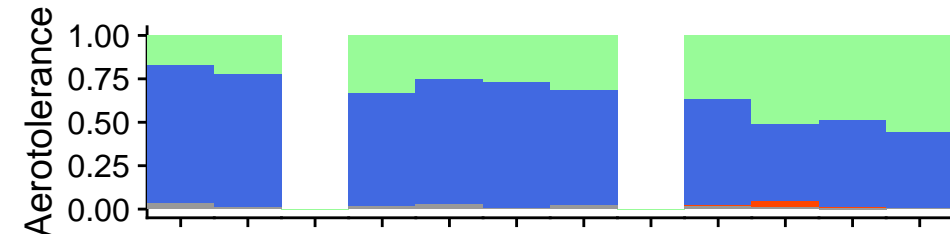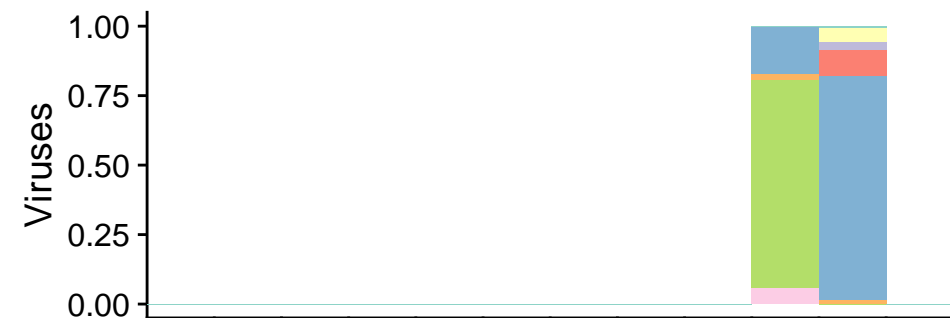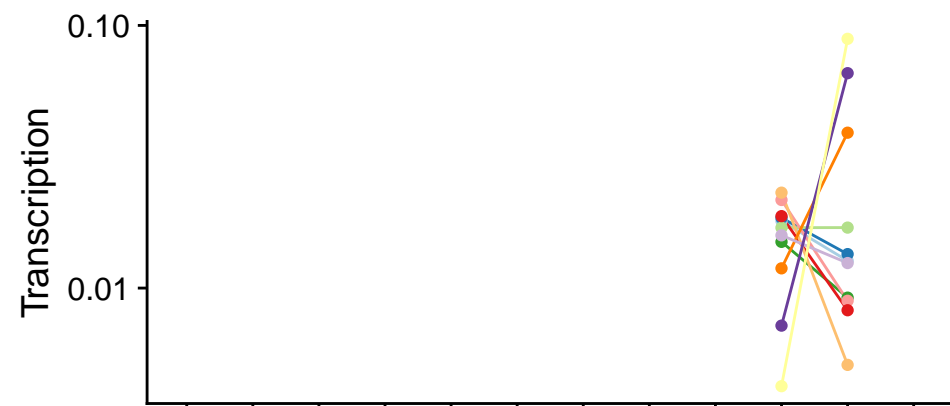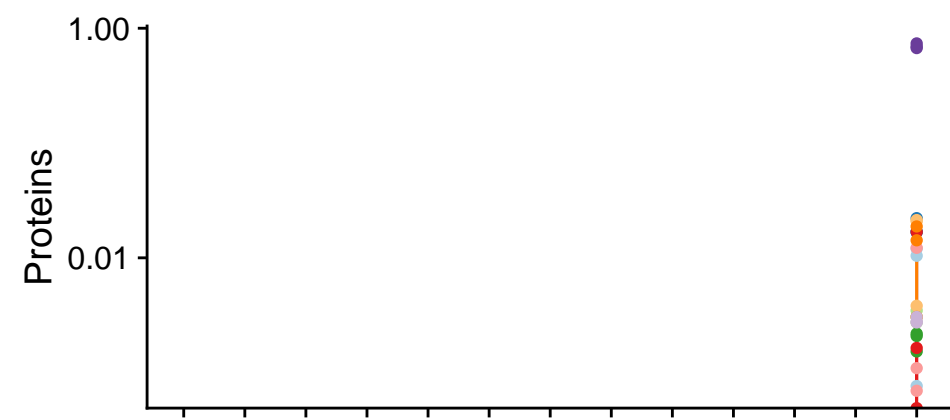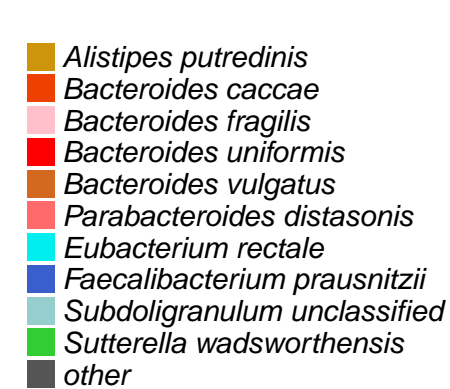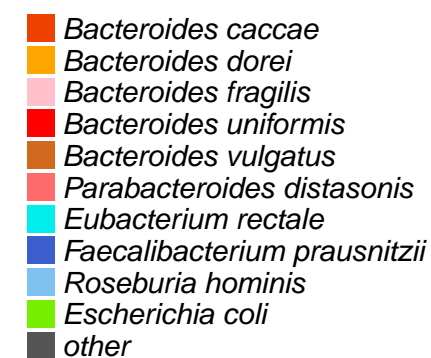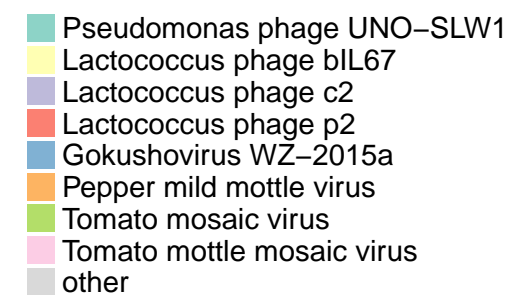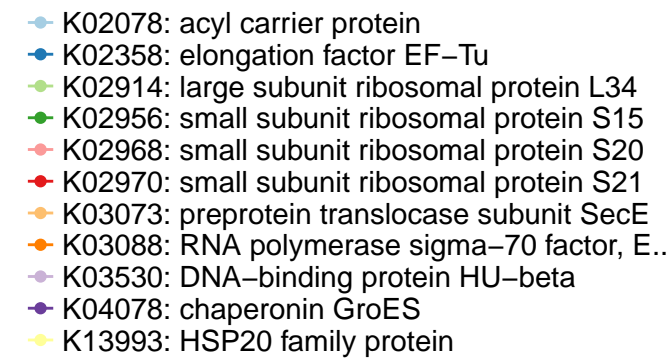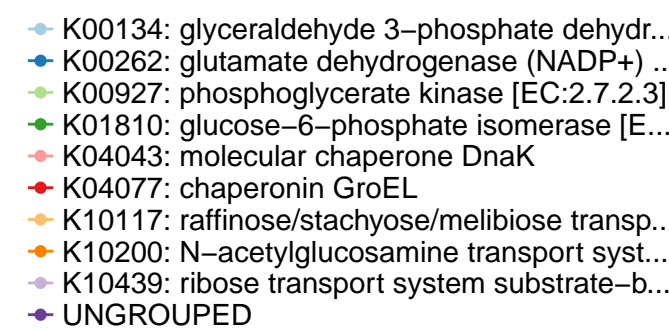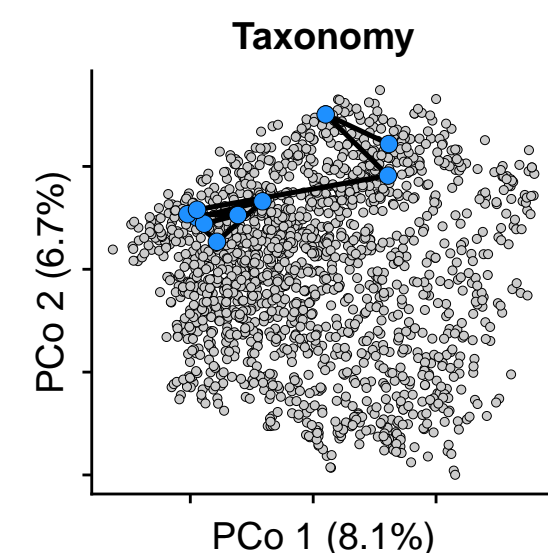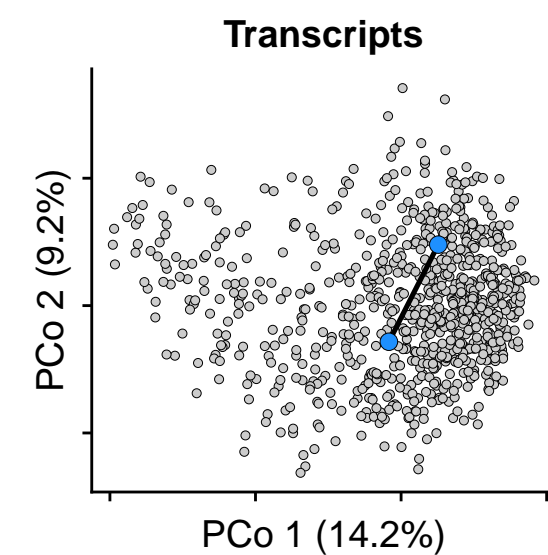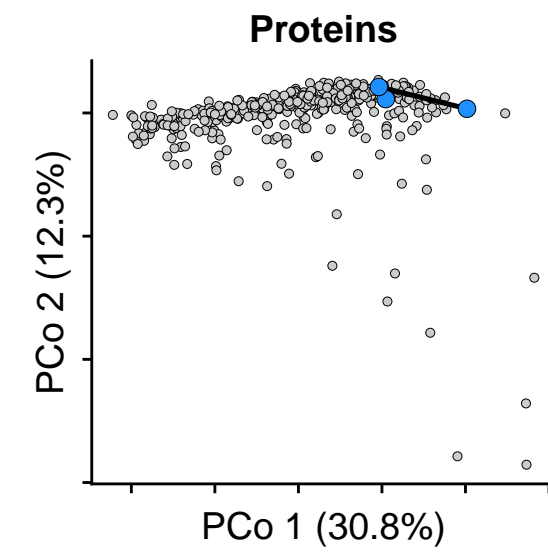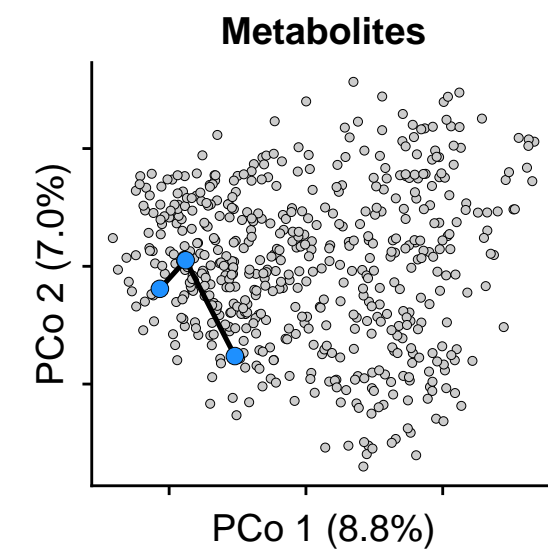

P6016: 16 Male White MGH Pediatrics | CD L3+L4

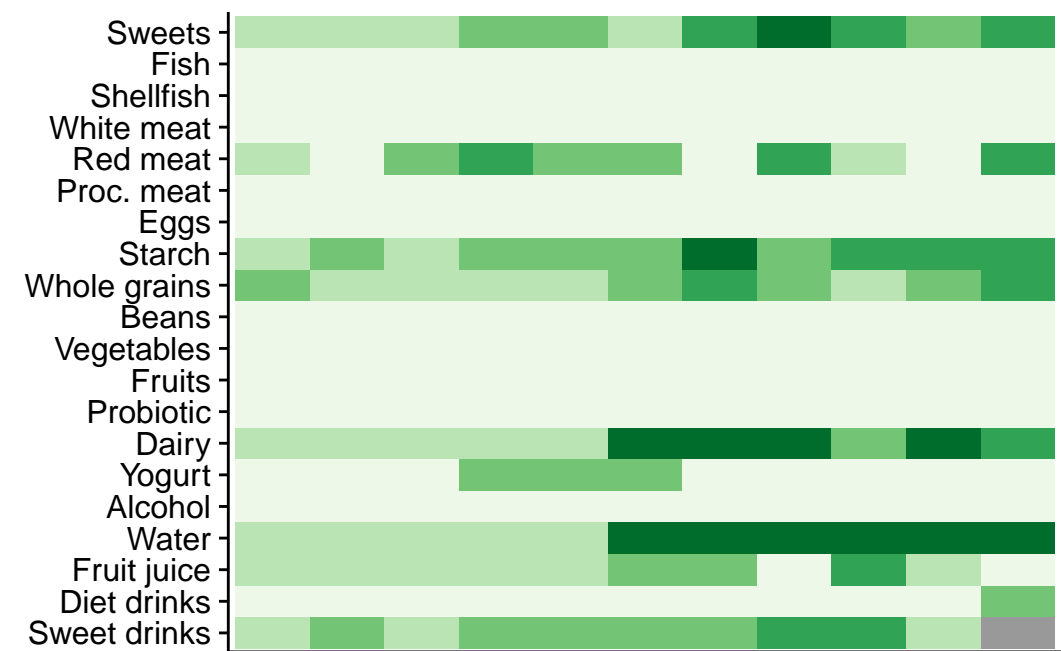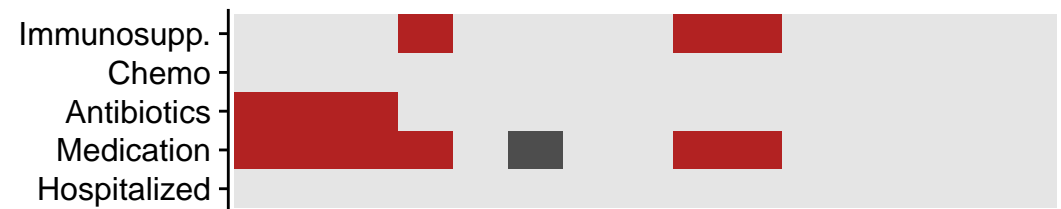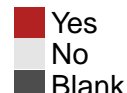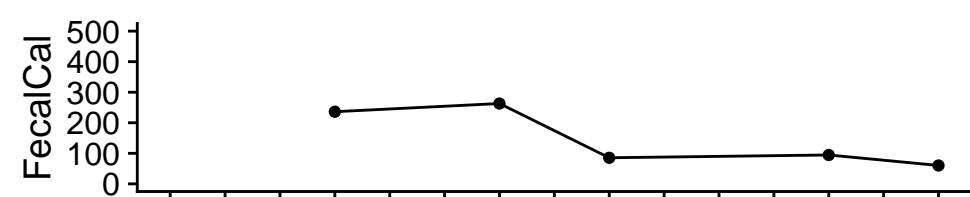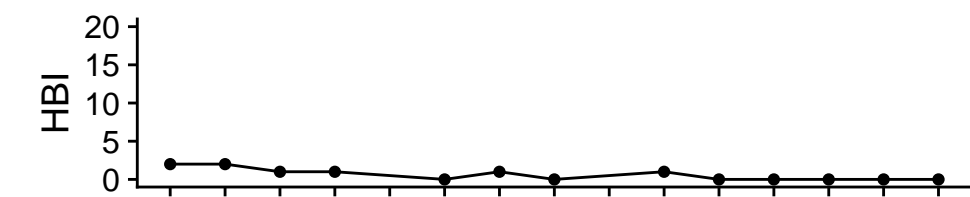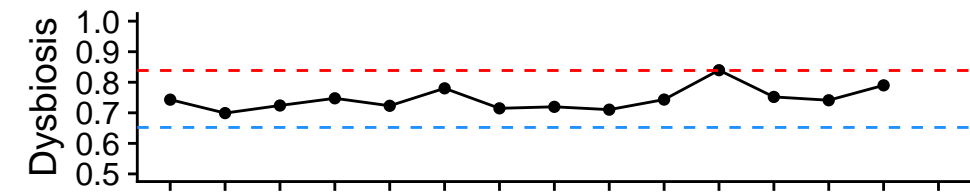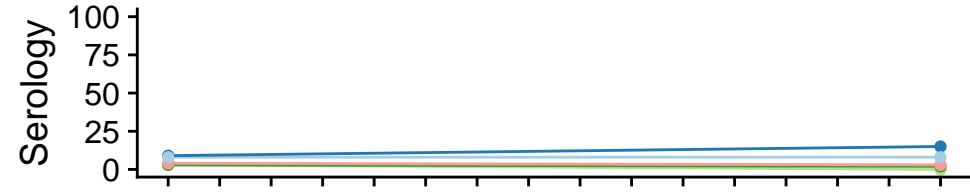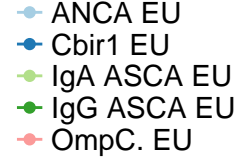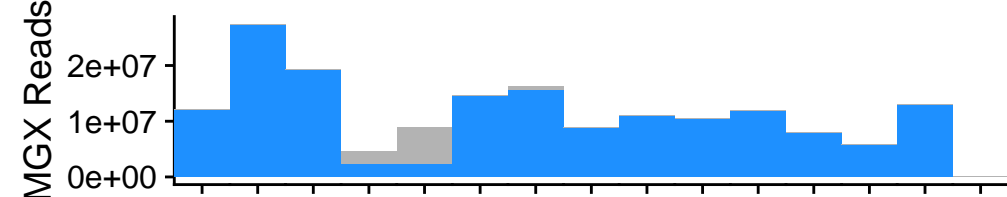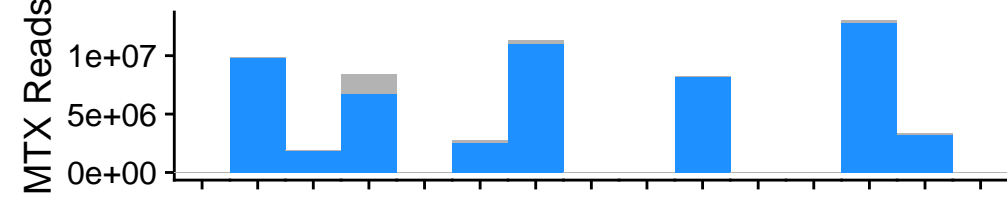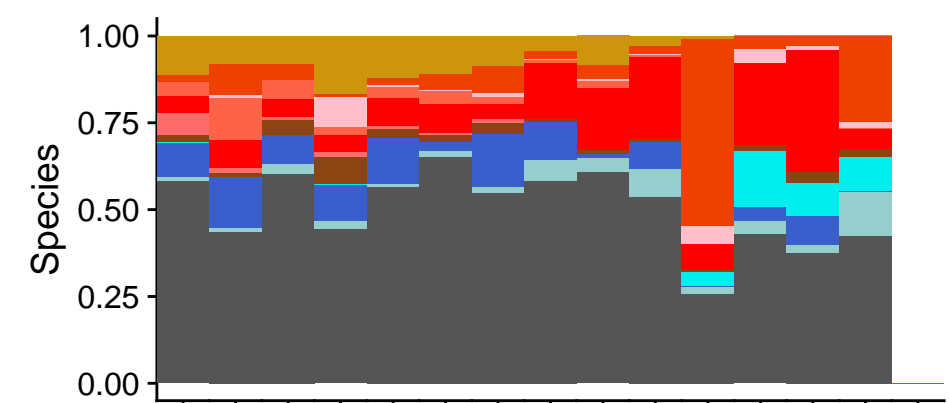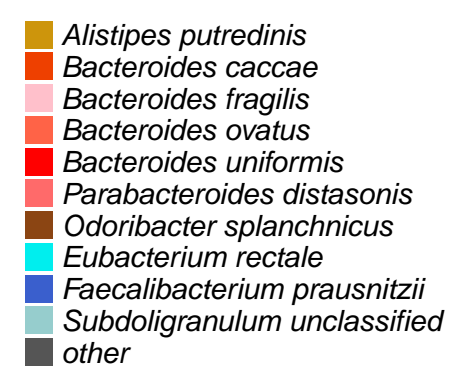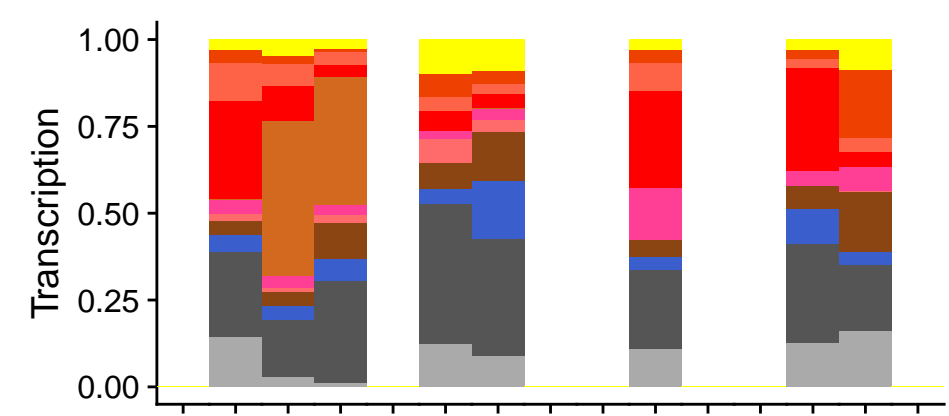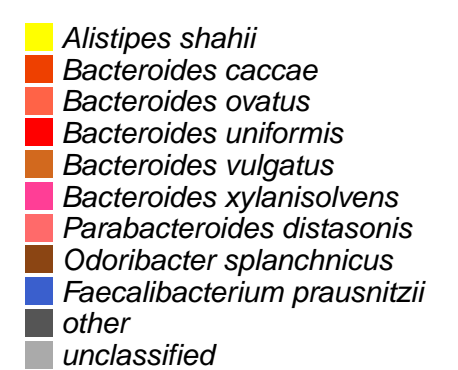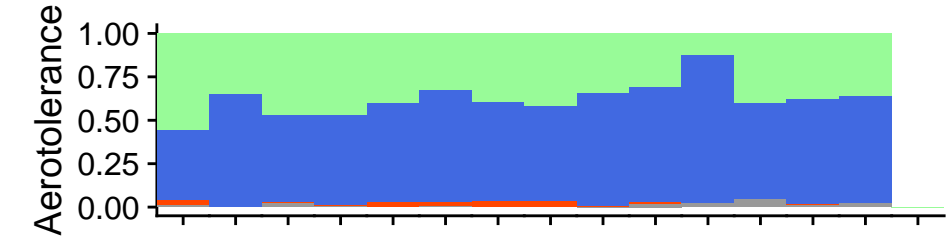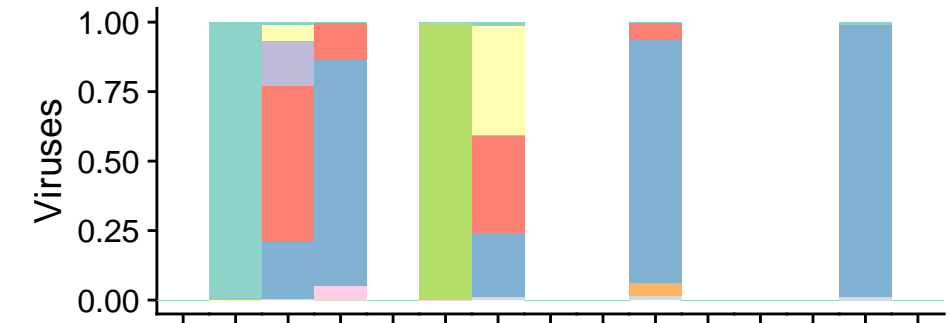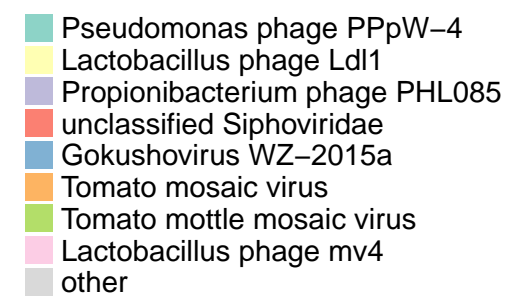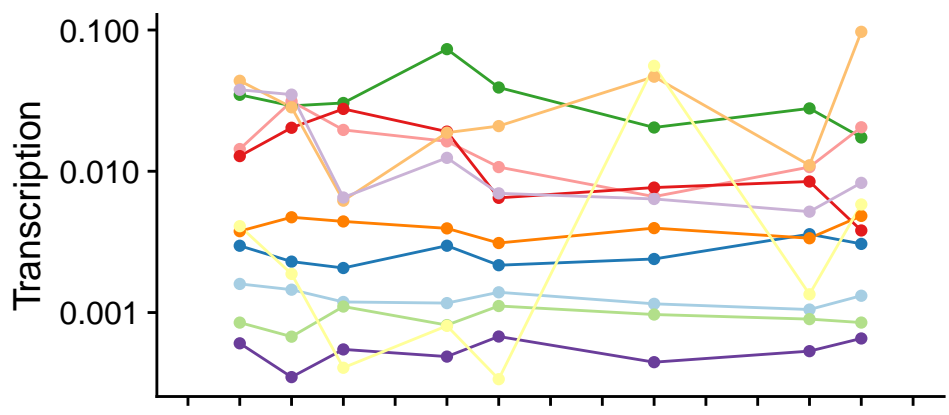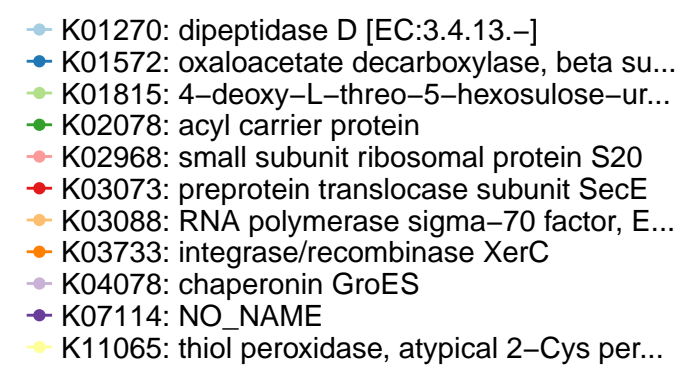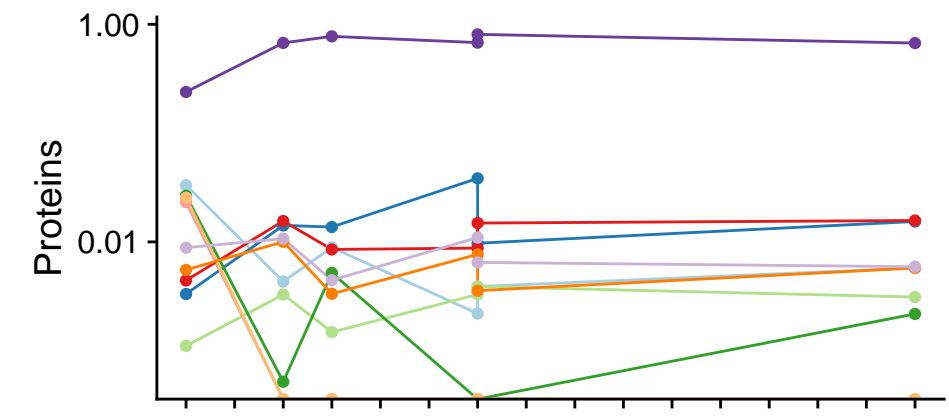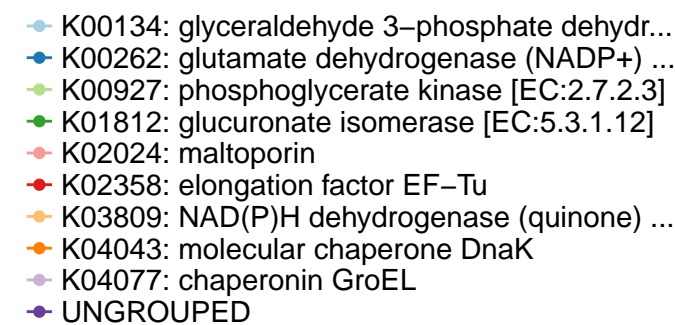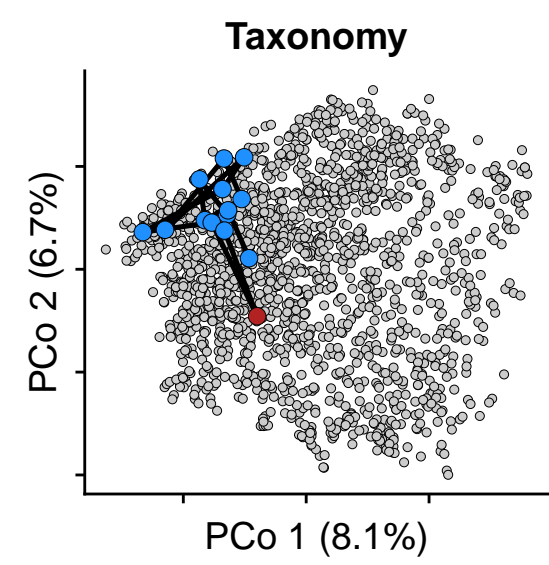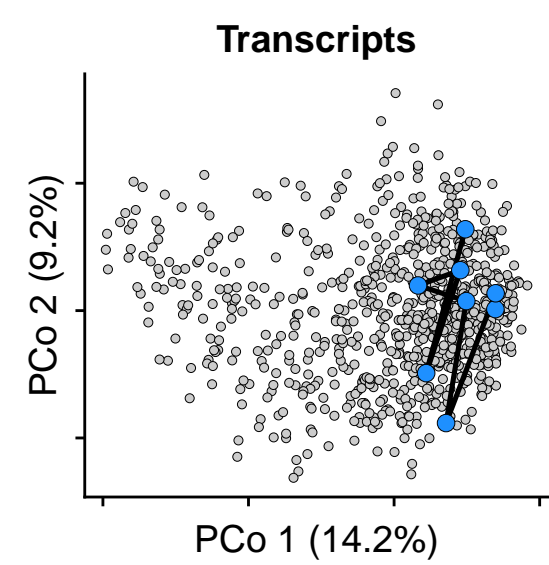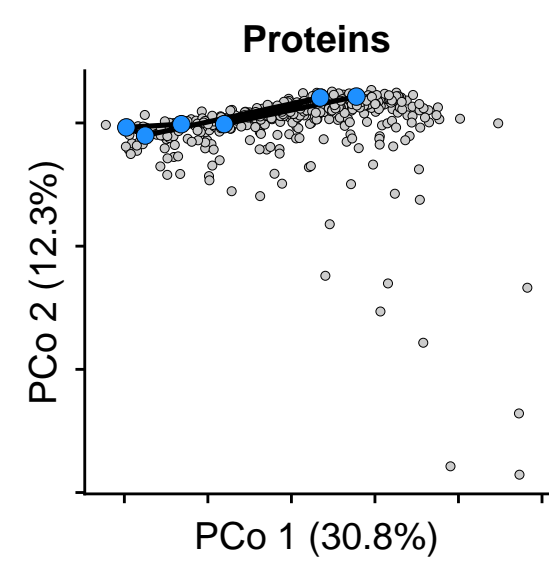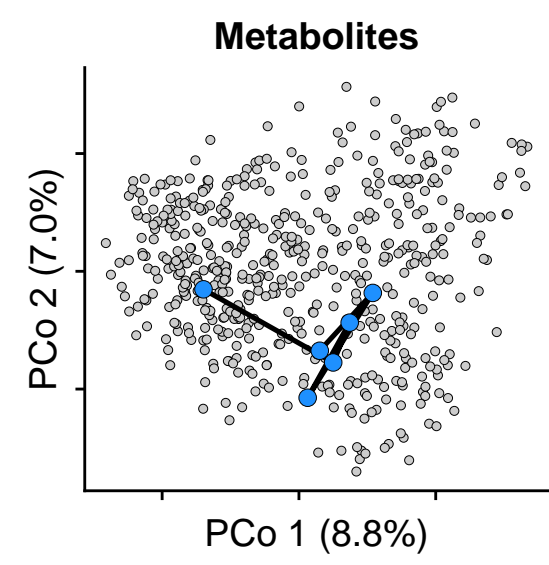

P6017: 11 Male White MGH Pediatrics | nonIBD

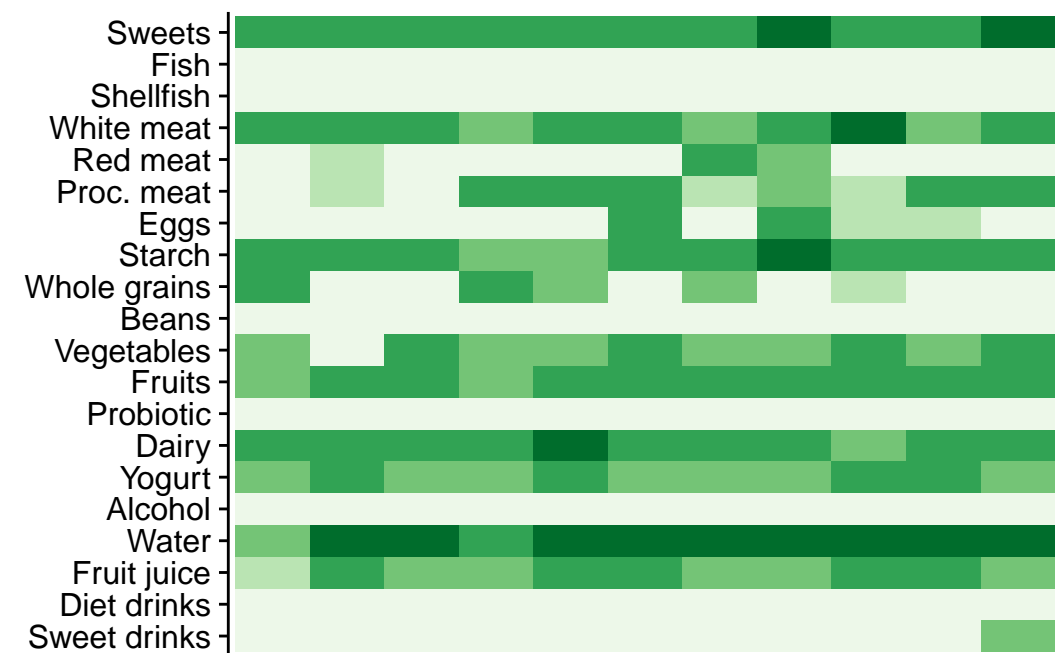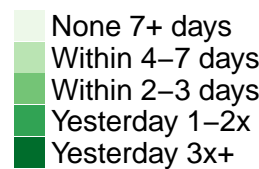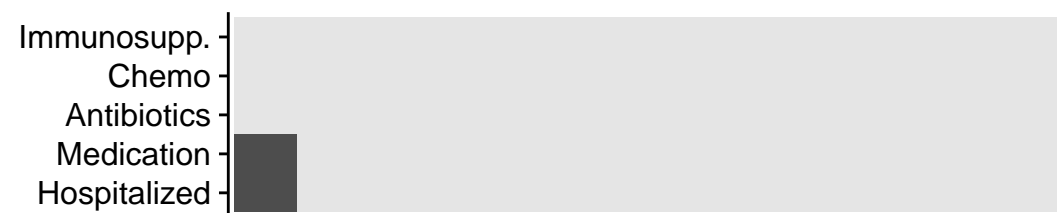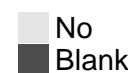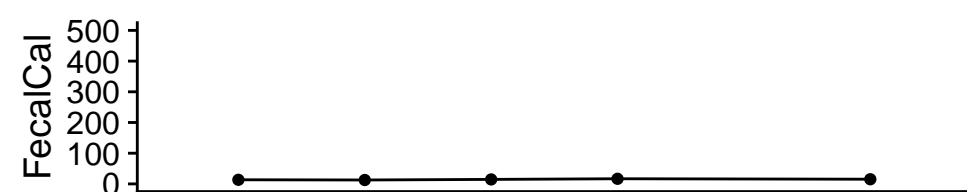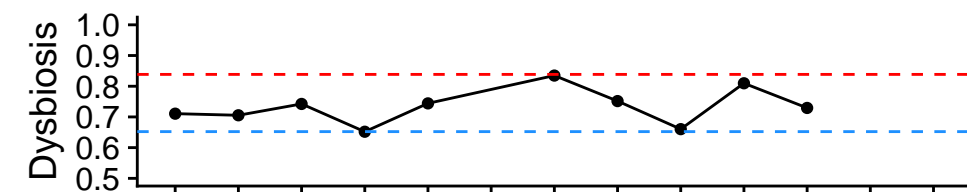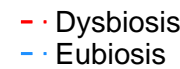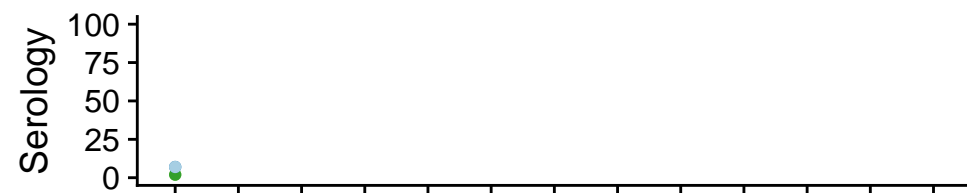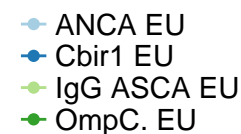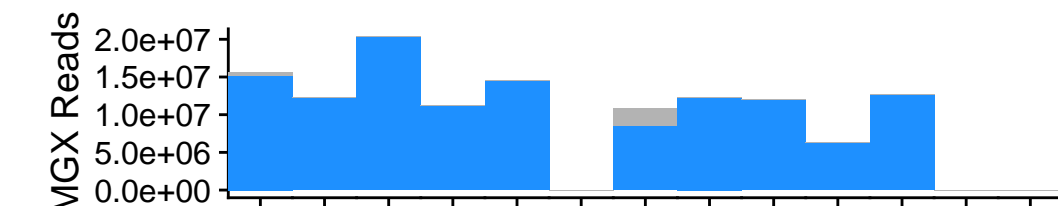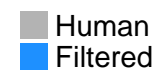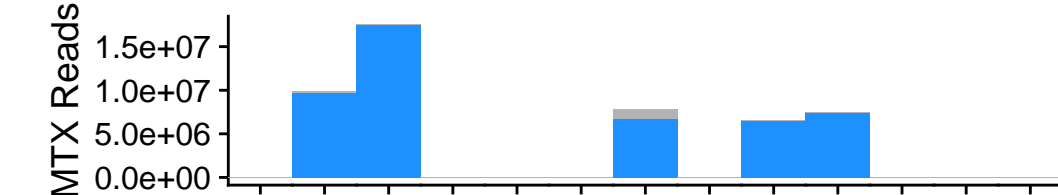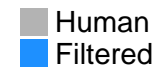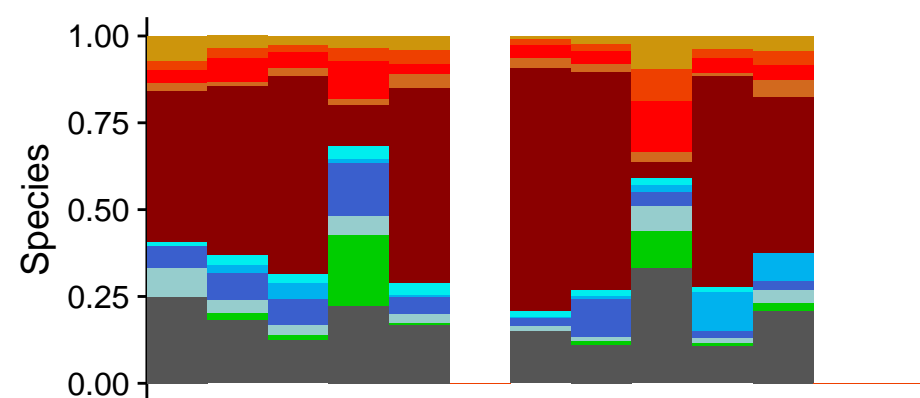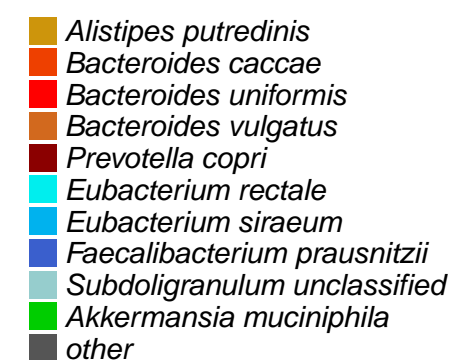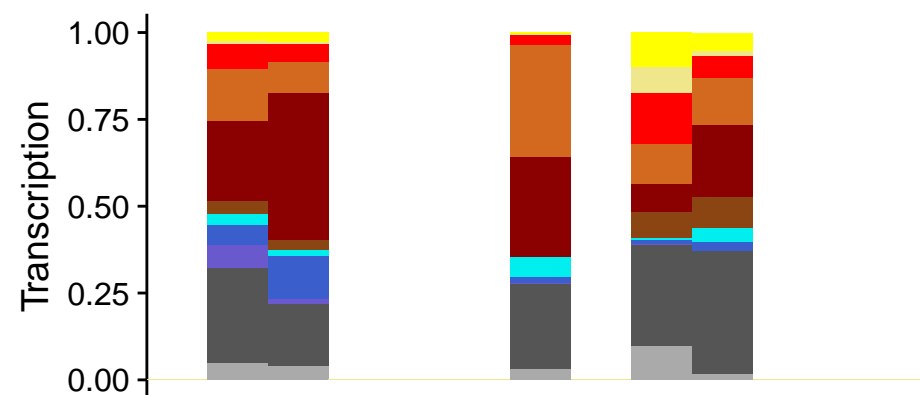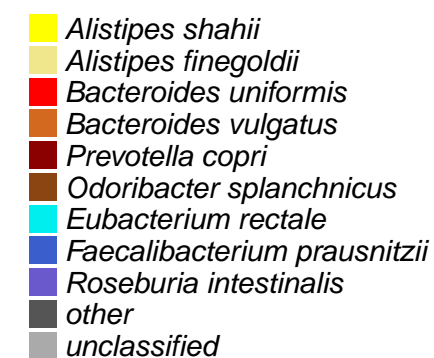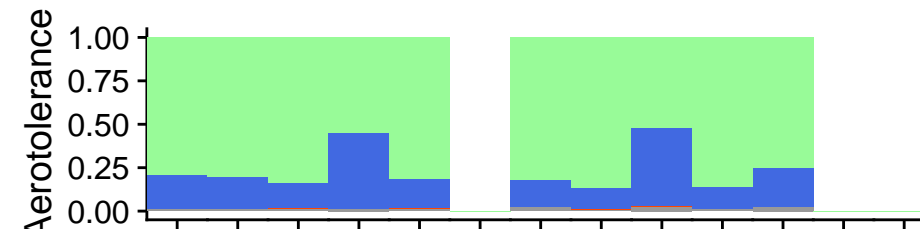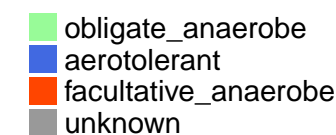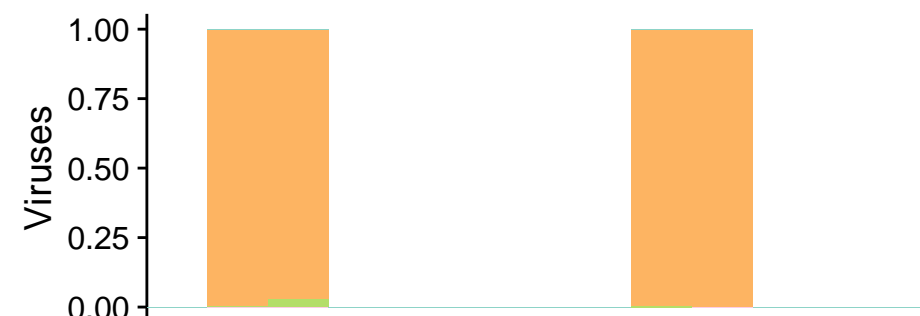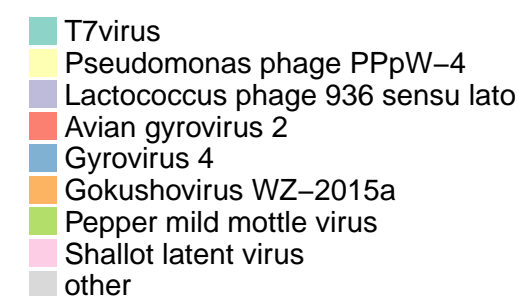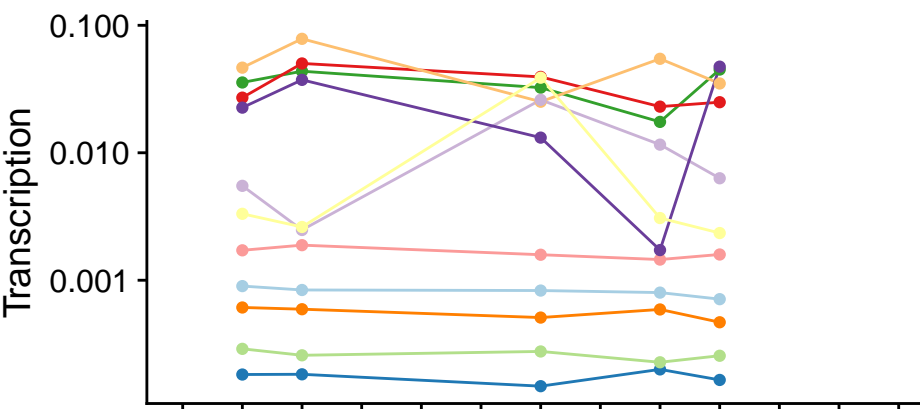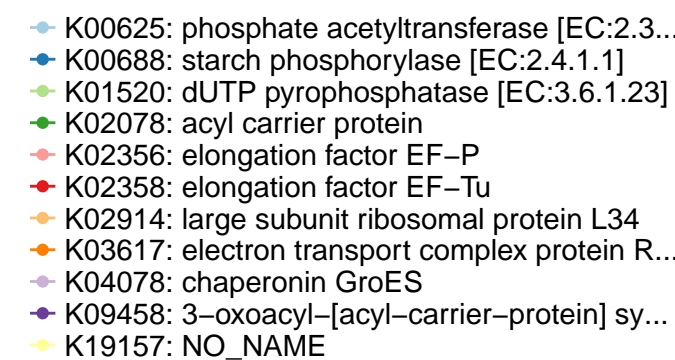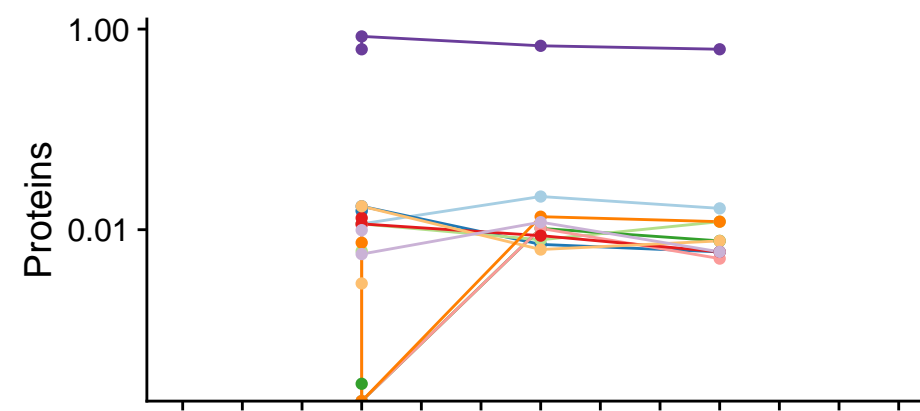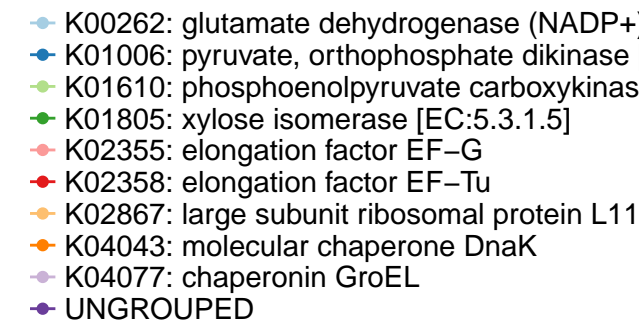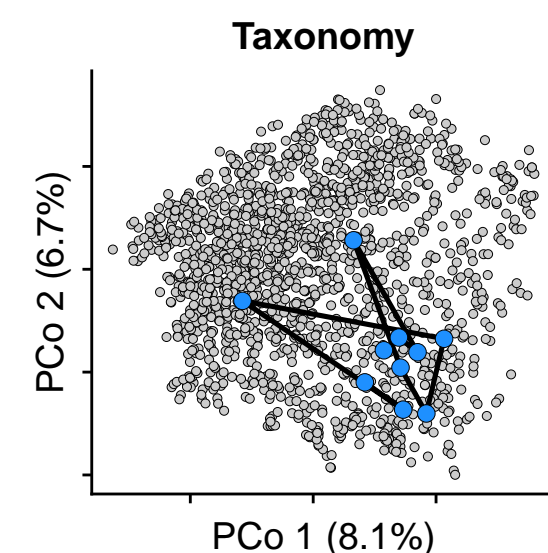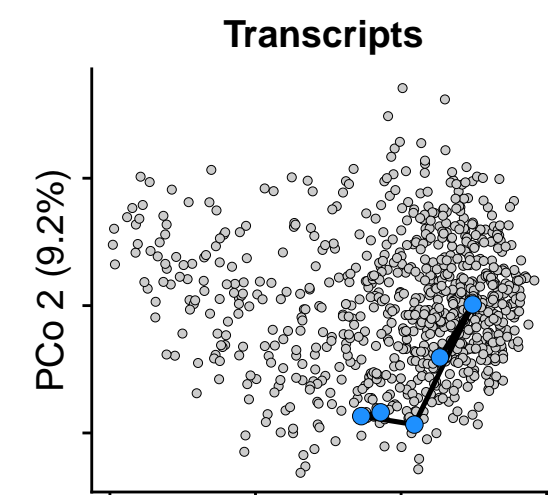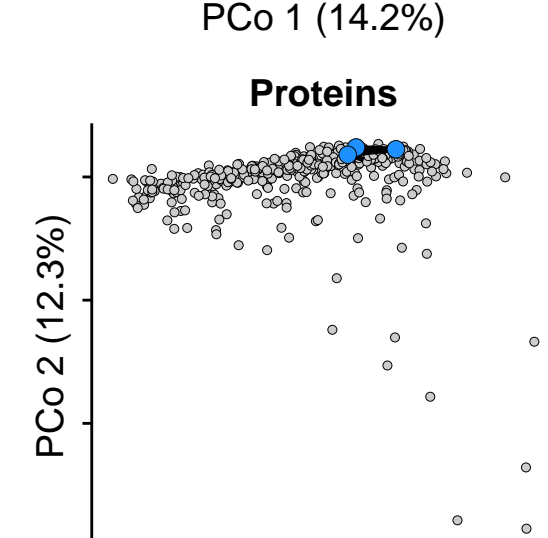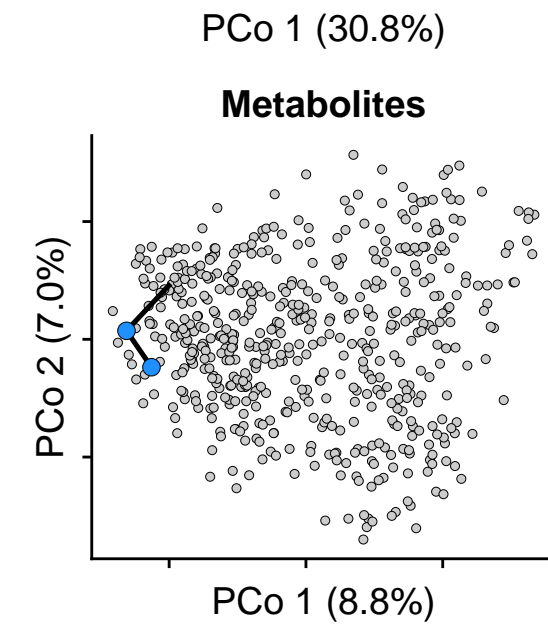



P6018: 17 Female White MGH Pediatrics | nonIBD

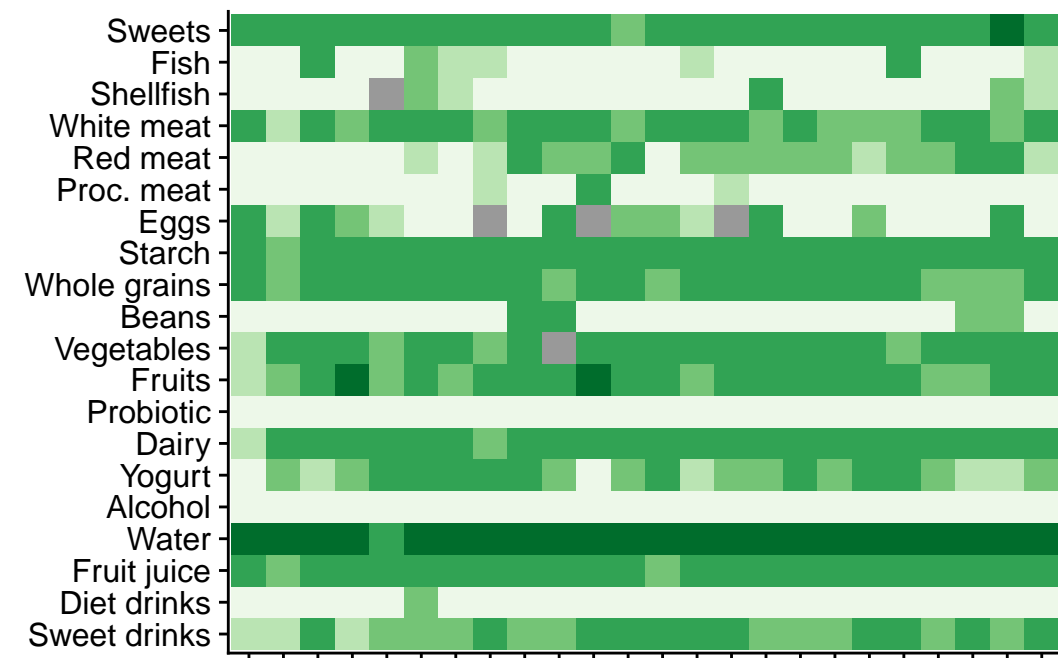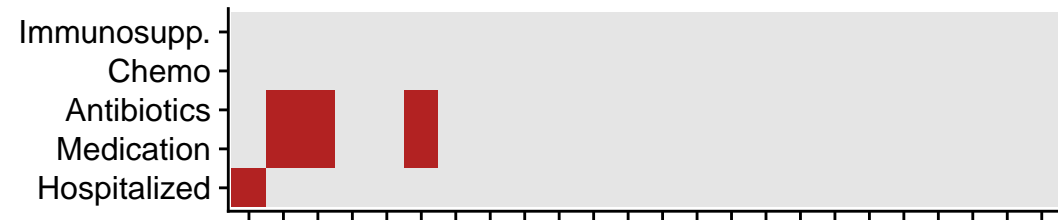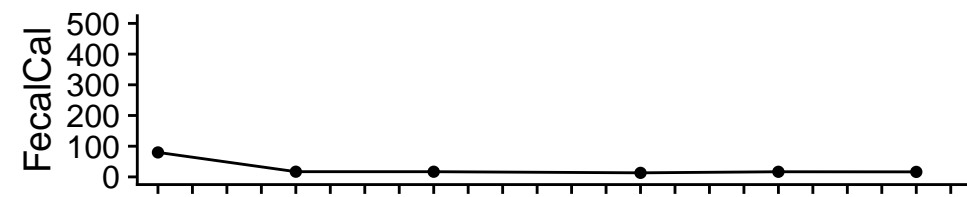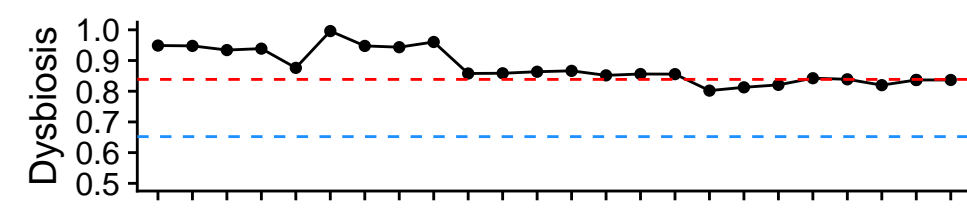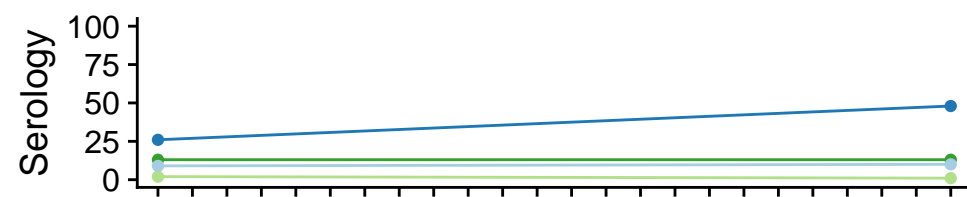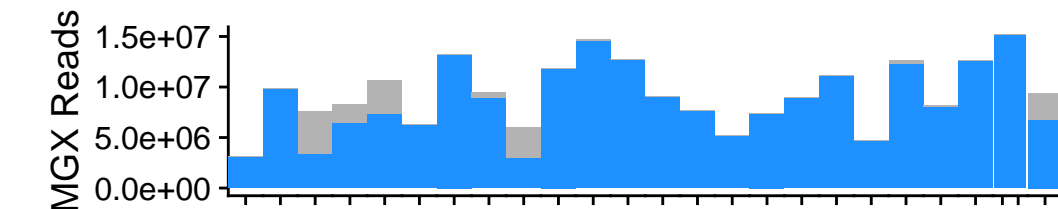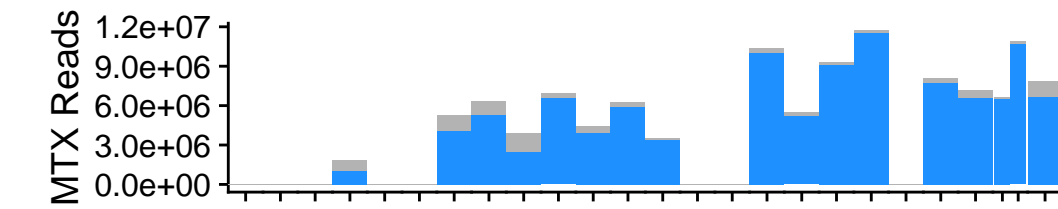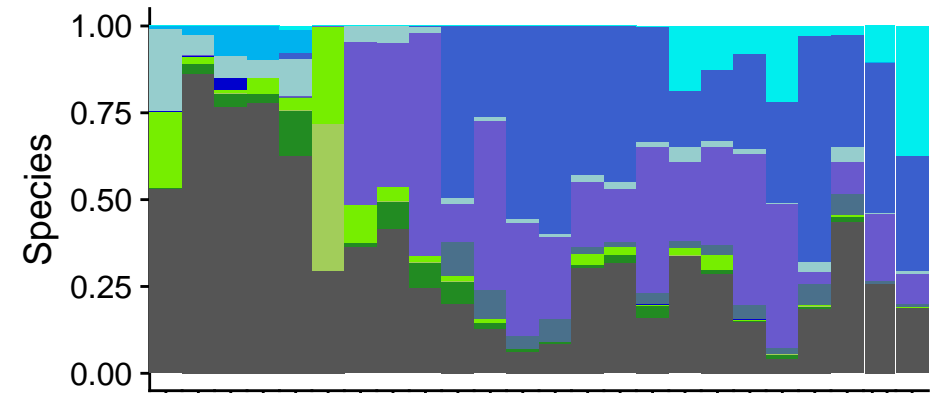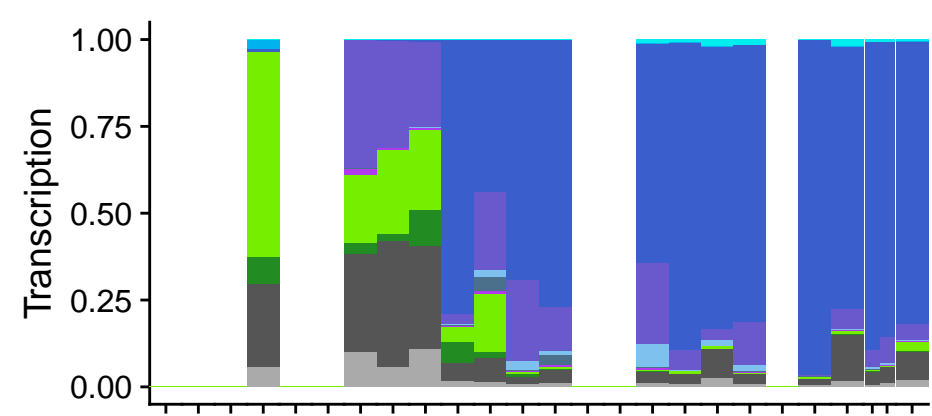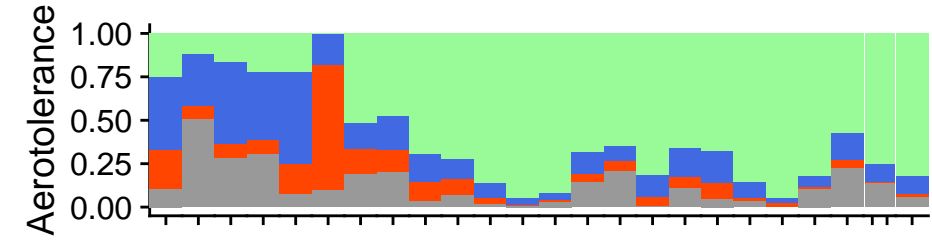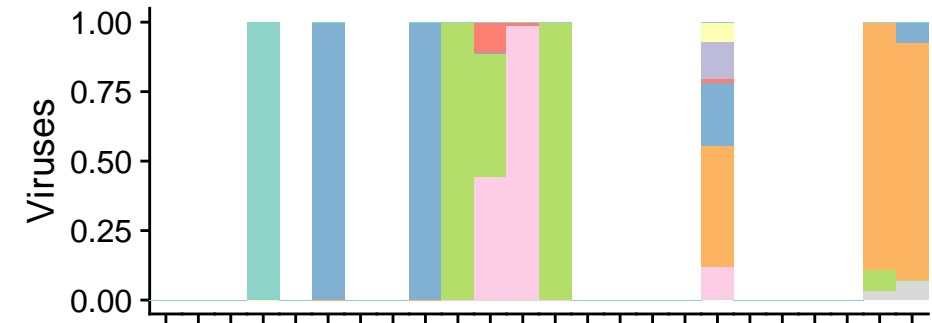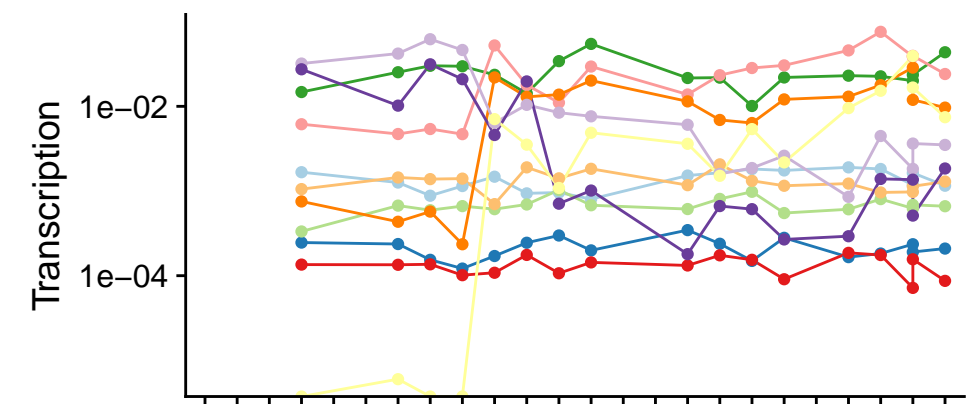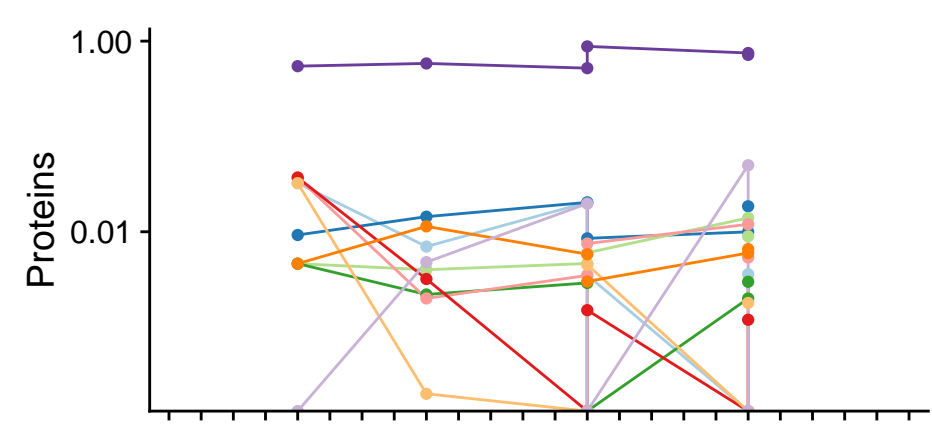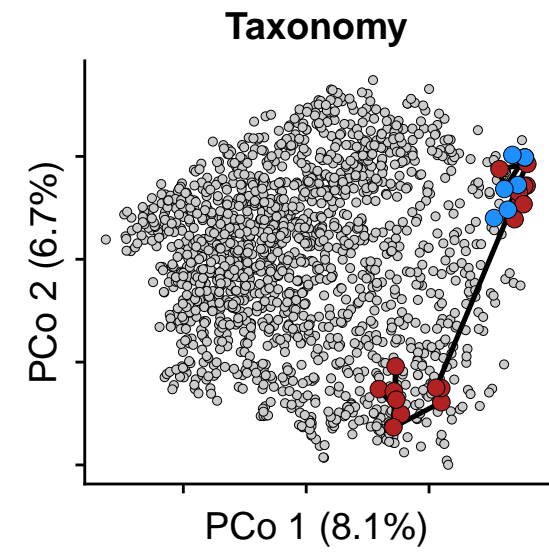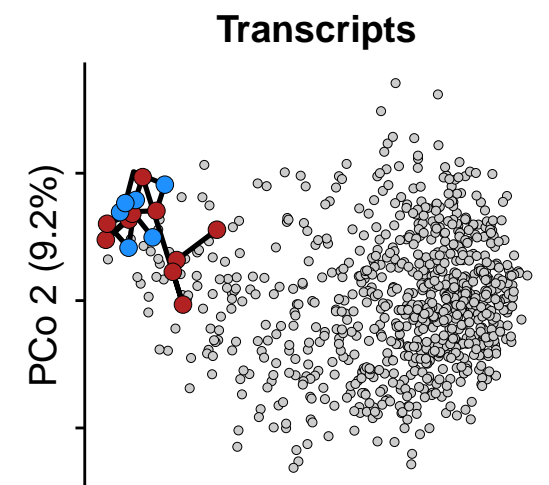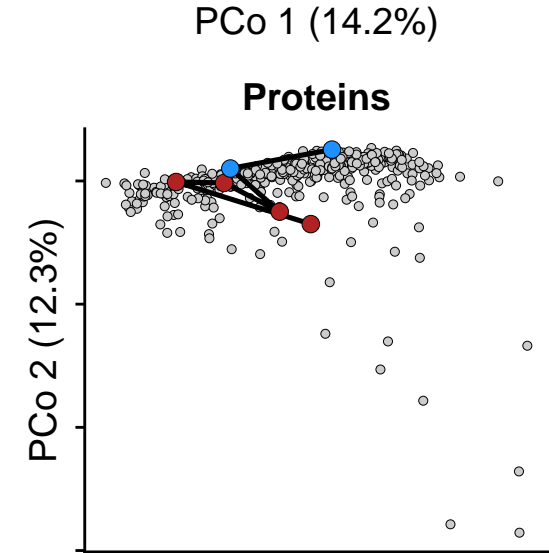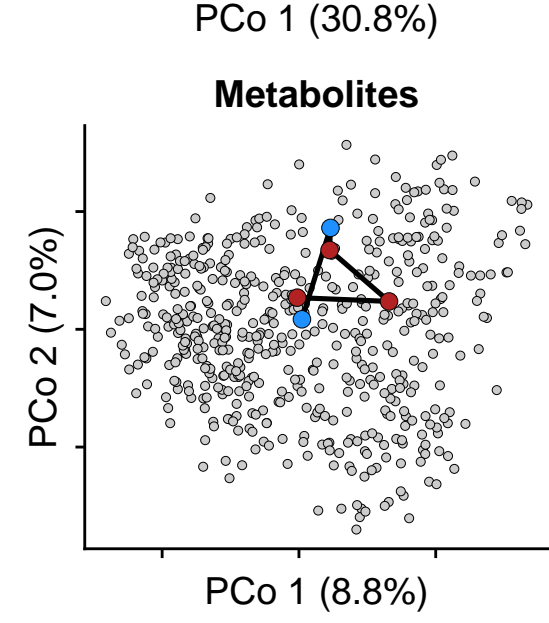

P6024: 16 Male American Indian or Alaska Native MGH Pediatrics | CD L3+L4

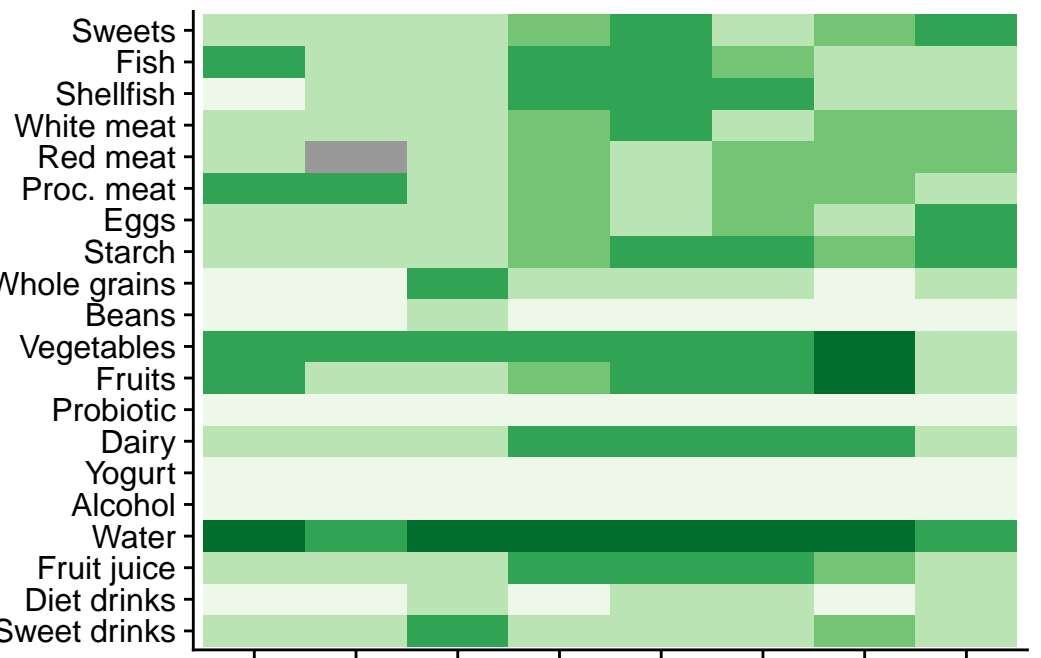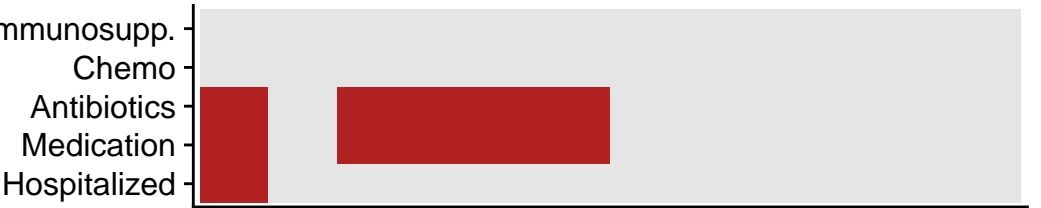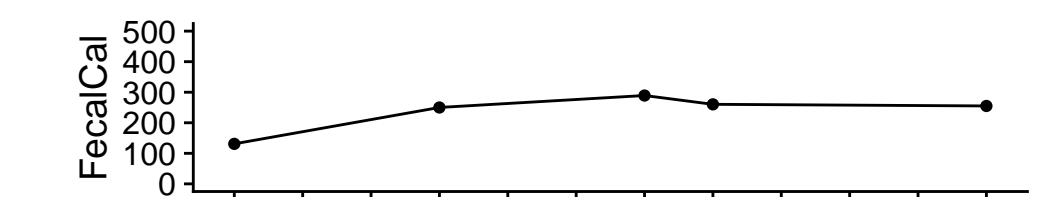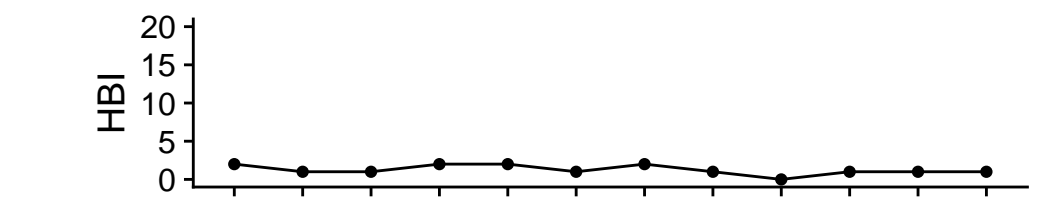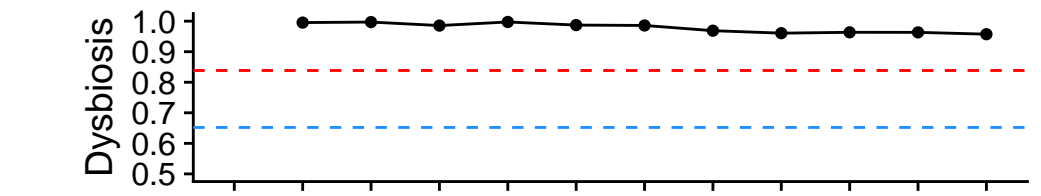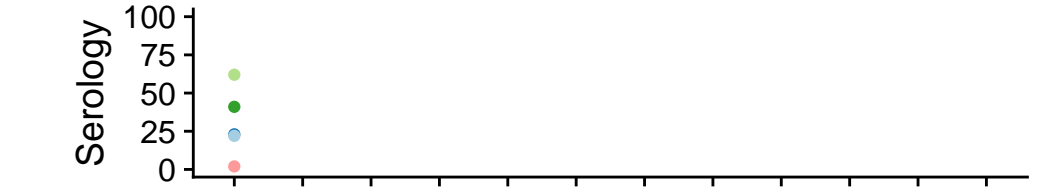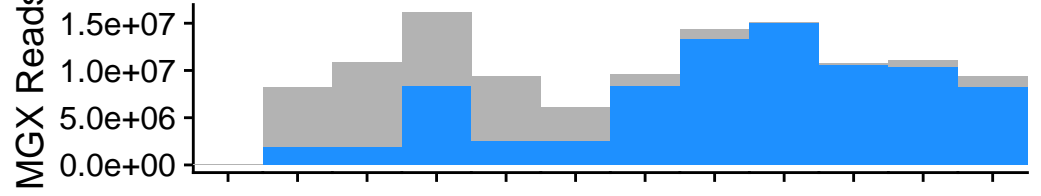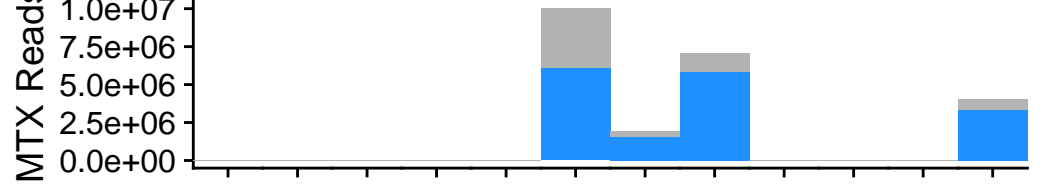

Blank  
None 7+ days  
Within 4-7 days  
Within 2-3 days  
Yesterday 1-2x  
Yesterday 3x+

Yes  
No

Dysbiosis  
Eubiosis

ANCA EU  
Cbir1 EU  
IgA ASCA EU  
IgG ASCA EU  
OmpC. EU

Human  
Filtered

Human  
Filtered

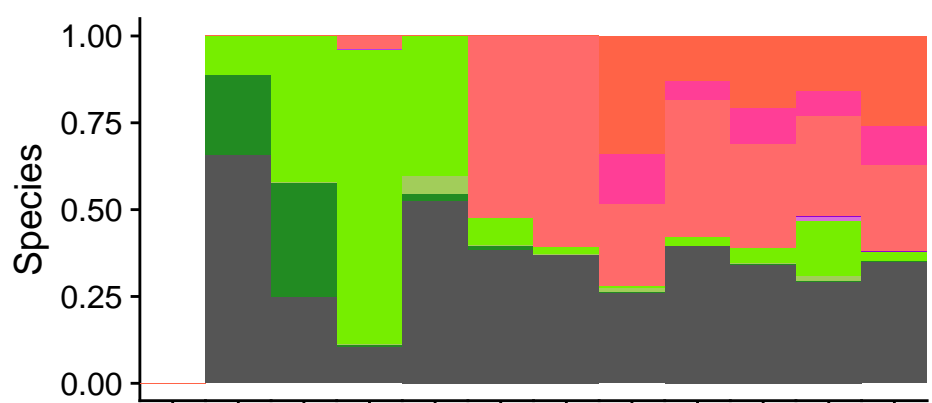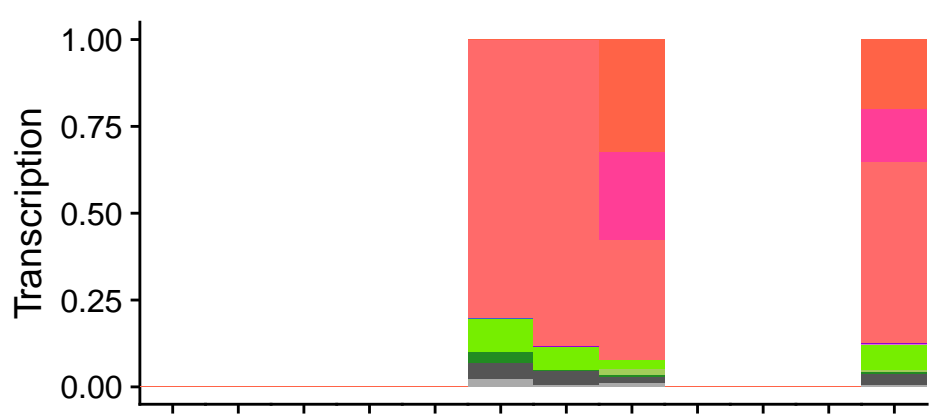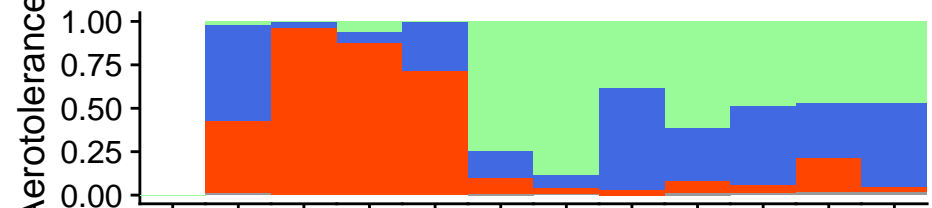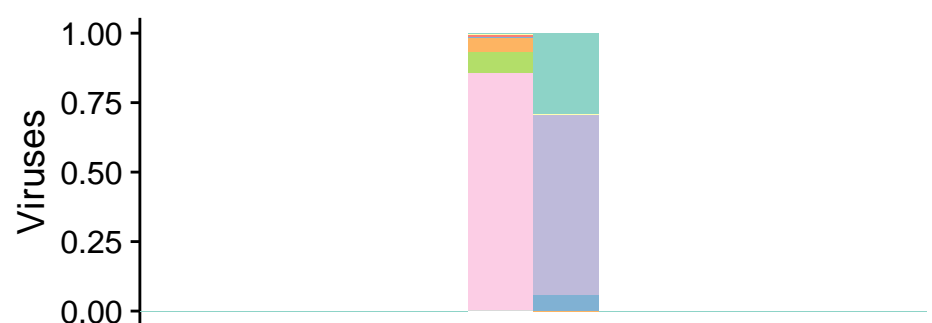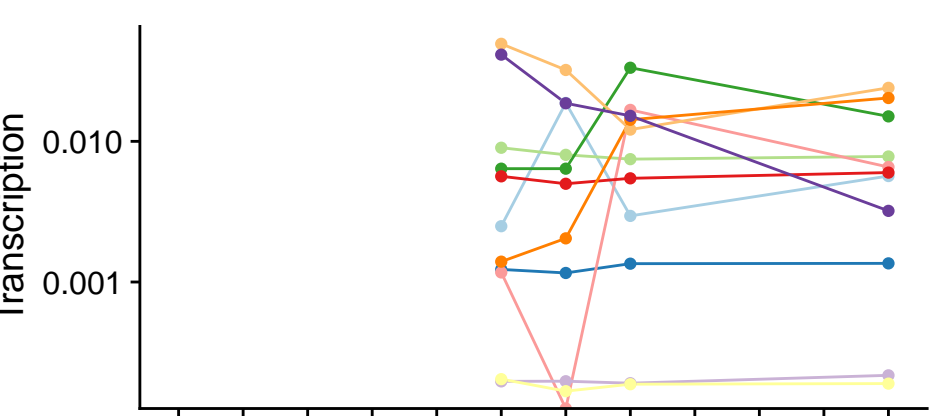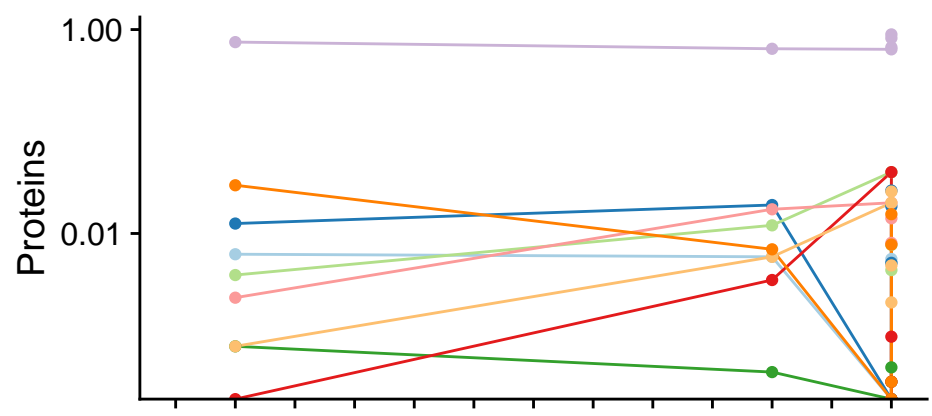

*Bacteroides ovatus*  
*Bacteroides xylanisolvens*  
*Parabacteroides distasonis*  
*Subdoligranulum unclassified*  
*Ruminococcus torques*  
*Ruminococcus obeum*  
*Lachnospiraceae bacterium 5 1 63FAA*  
*Escherichia coli*  
*Klebsiella pneumoniae*  
*Haemophilus parainfluenzae*  
other

*Bacteroides ovatus*  
*Bacteroides xylanisolvens*  
*Parabacteroides distasonis*  
*Faecalibacterium prausnitzii*  
*Ruminococcus obeum*  
*Lachnospiraceae bacterium 5 1 63FAA*  
*Escherichia coli*  
*Klebsiella pneumoniae*  
*Haemophilus parainfluenzae*  
other  
unclassified

obligate\_anaerobe  
aerotolerant  
facultative\_anaerobe  
unknown

*Pseudomonas phage phiIBB-PF7A*  
*T7virus*  
*Pseudomonas phage PPpW-4*  
*Clostridium phage phi3626*  
*Streptococcus phage YMC-2011*  
unclassified Siphoviridae  
*Bell pepper mottle virus*  
*Pepper mild mottle virus*  
other

K00058: D-3-phosphoglycerate dehydrogen...  
K01572: oxaloacetate decarboxylase, beta su...  
K01610: phosphoenolpyruvate carboxykinase...  
K02078: acyl carrier protein  
K02919: large subunit ribosomal protein L36  
K02931: large subunit ribosomal protein L5  
K03073: preprotein translocase subunit SecE  
K03088: RNA polymerase sigma-70 factor, E...  
K04764: integration host factor subunit alpha  
K06199: CrcB protein  
K09802: hypothetical protein

K00239: succinate dehydrogenase / fumarate...  
K00262: glutamate dehydrogenase (NADP+) ...  
K01610: phosphoenolpyruvate carboxykinase...  
K01790: dTDP-4-dehydrorhamnose 3,5-epi...  
K02358: elongation factor EF-Tu  
K02935: large subunit ribosomal protein L7/L...  
K04077: chaperonin GroEL  
K10117: raffinose/stachyose/melibiose transp...  
UNGROUPED

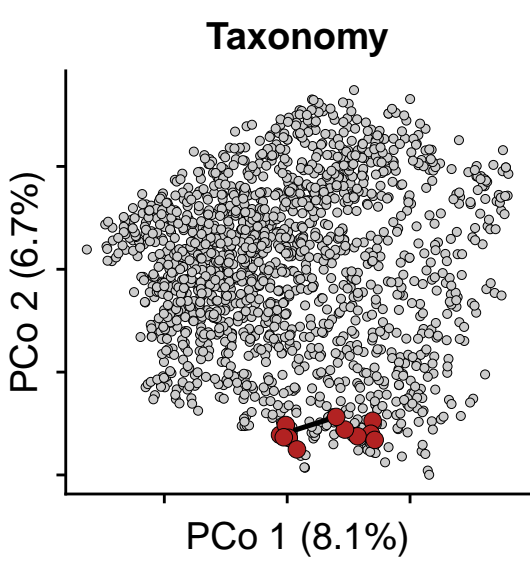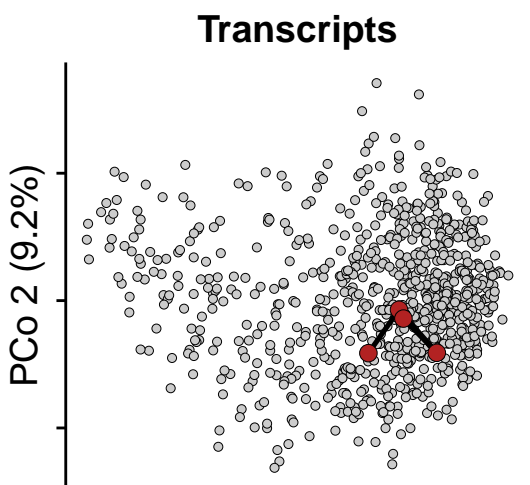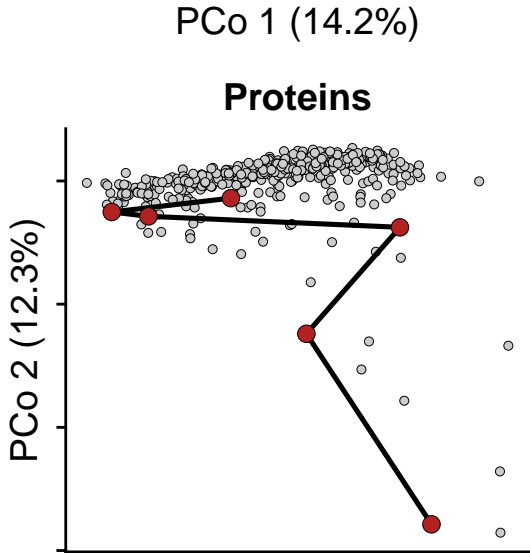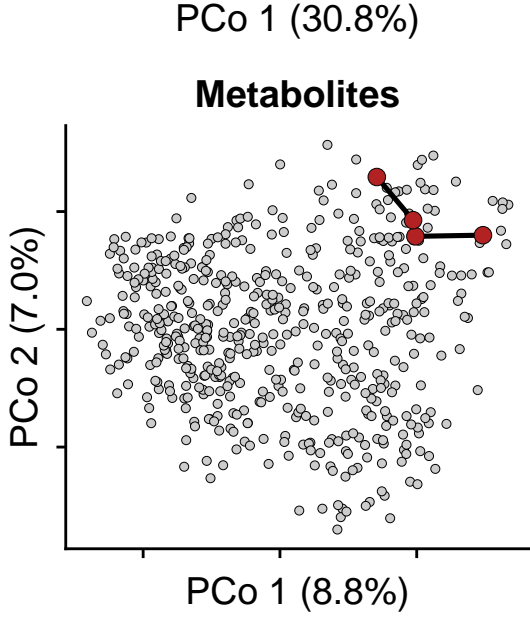

P6025: 17 Male White MGH Pediatrics | UC

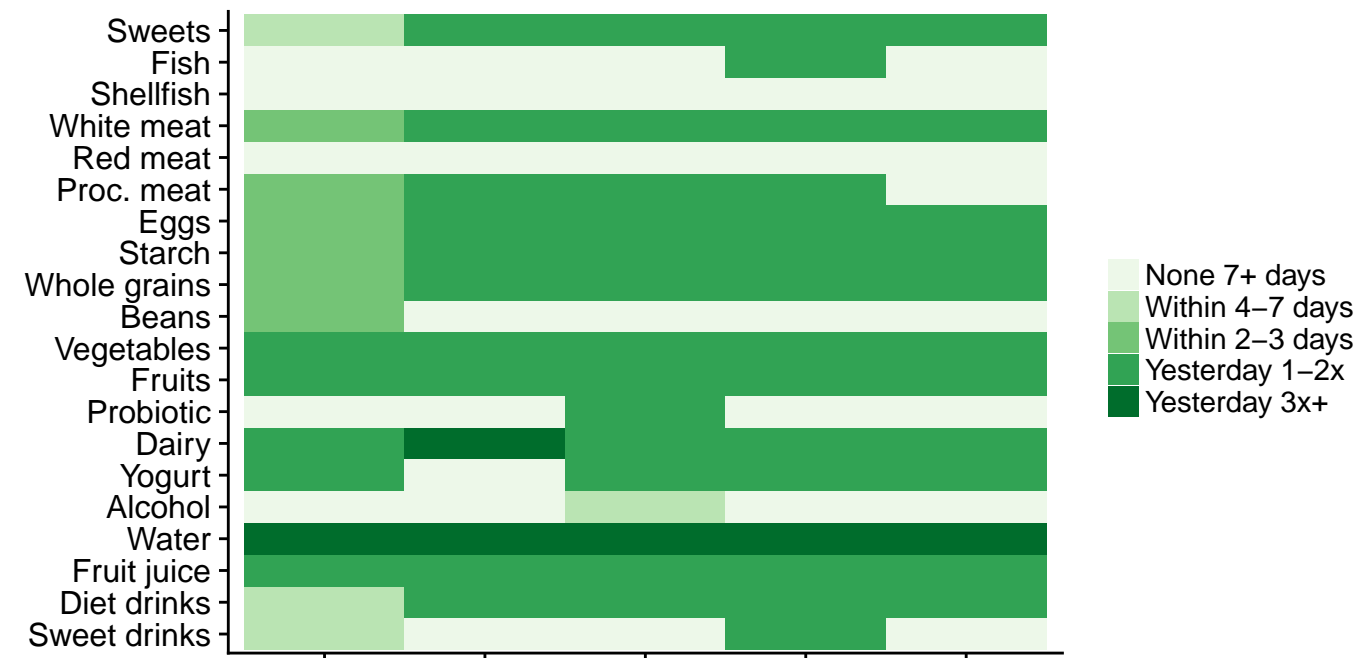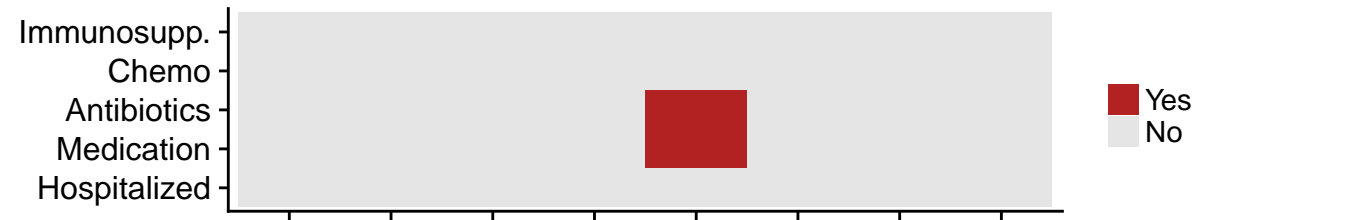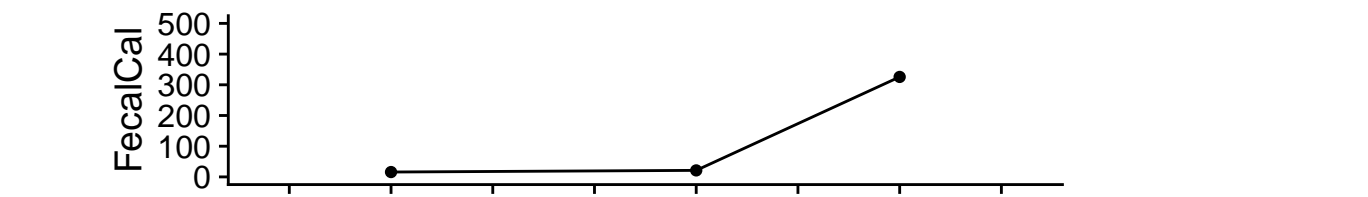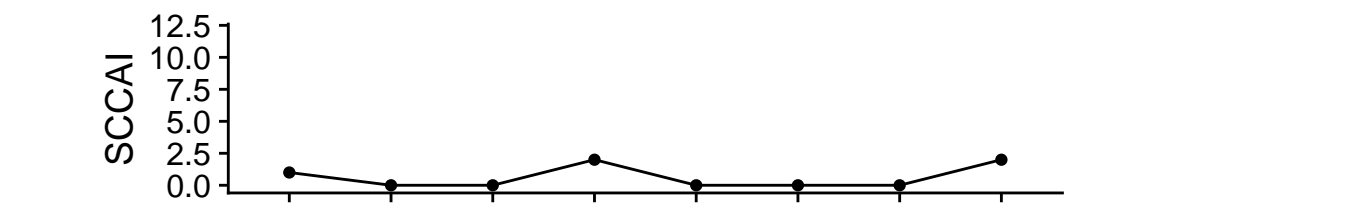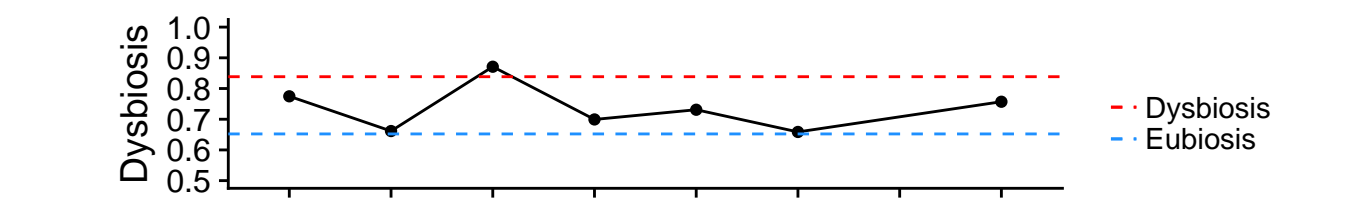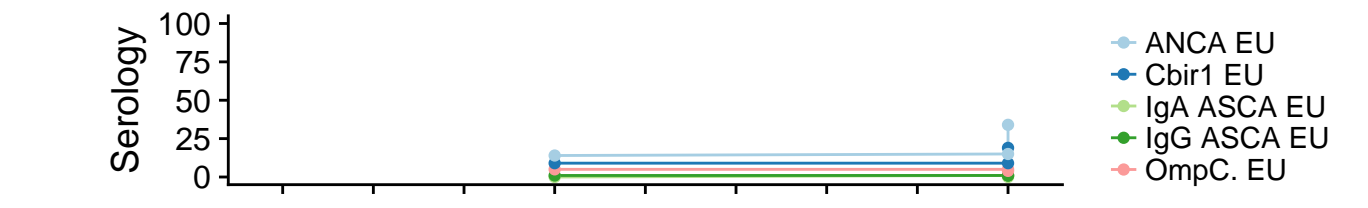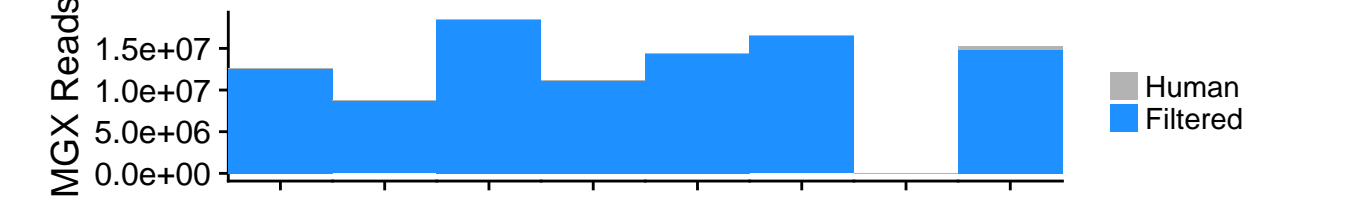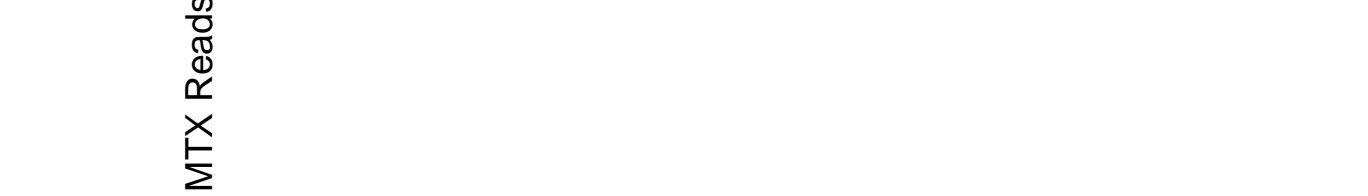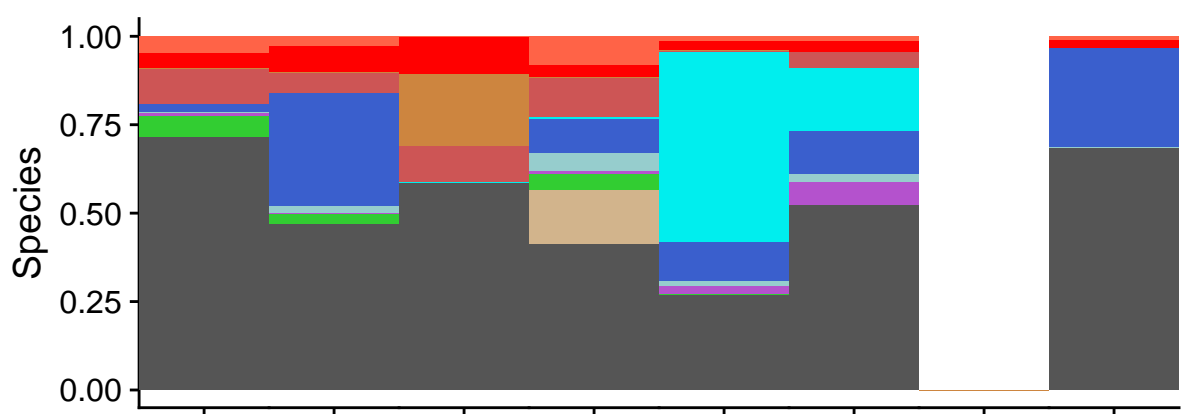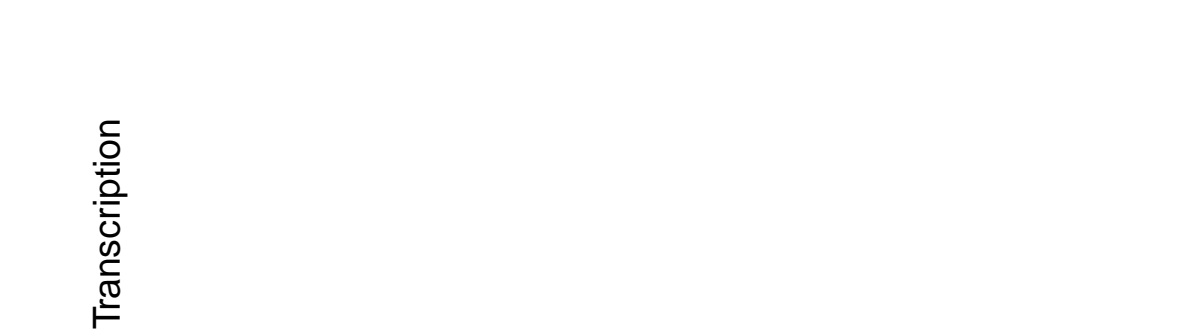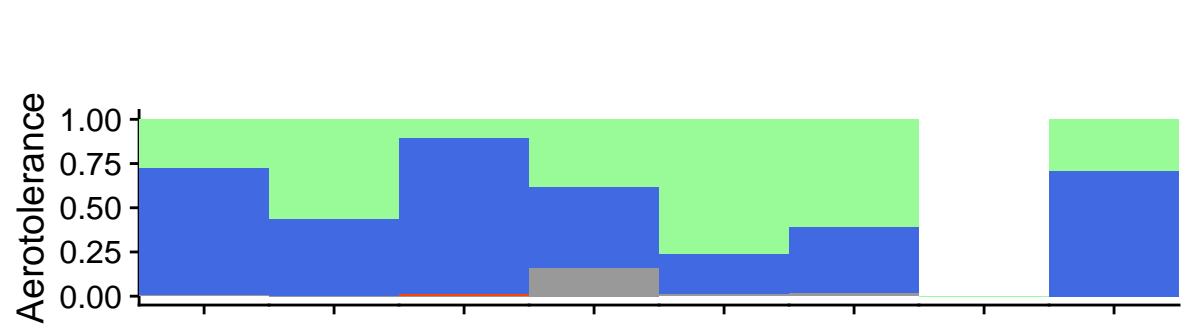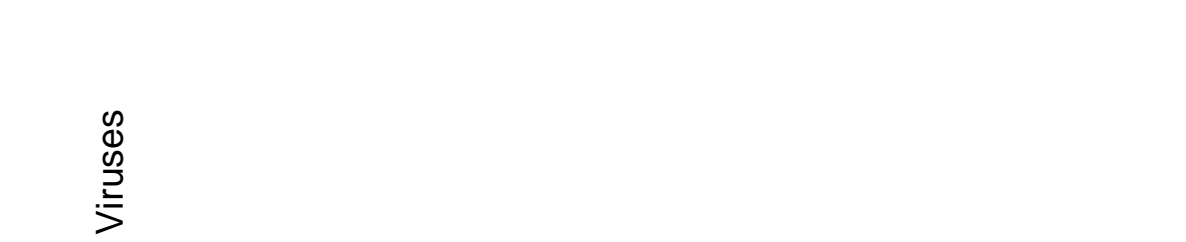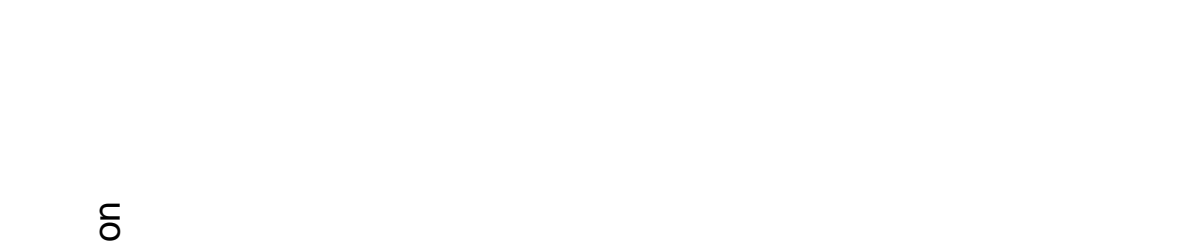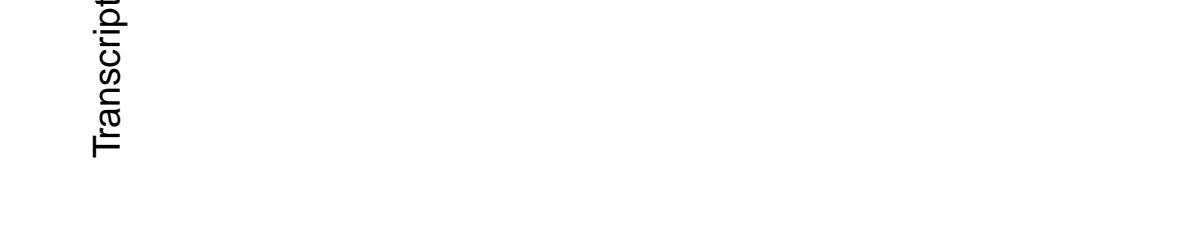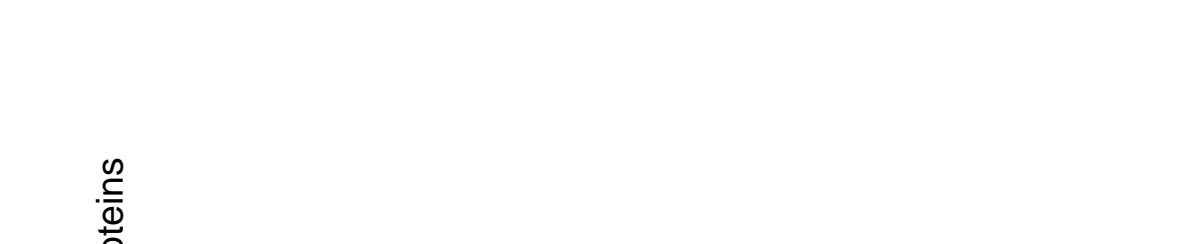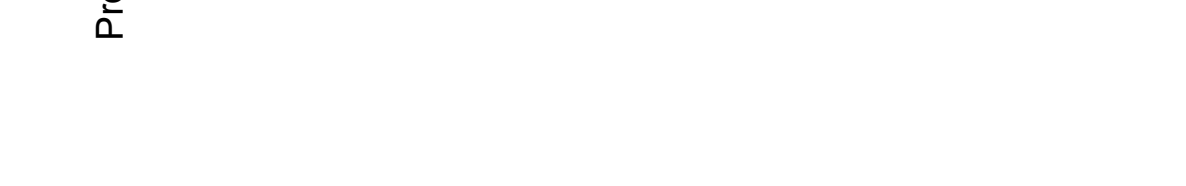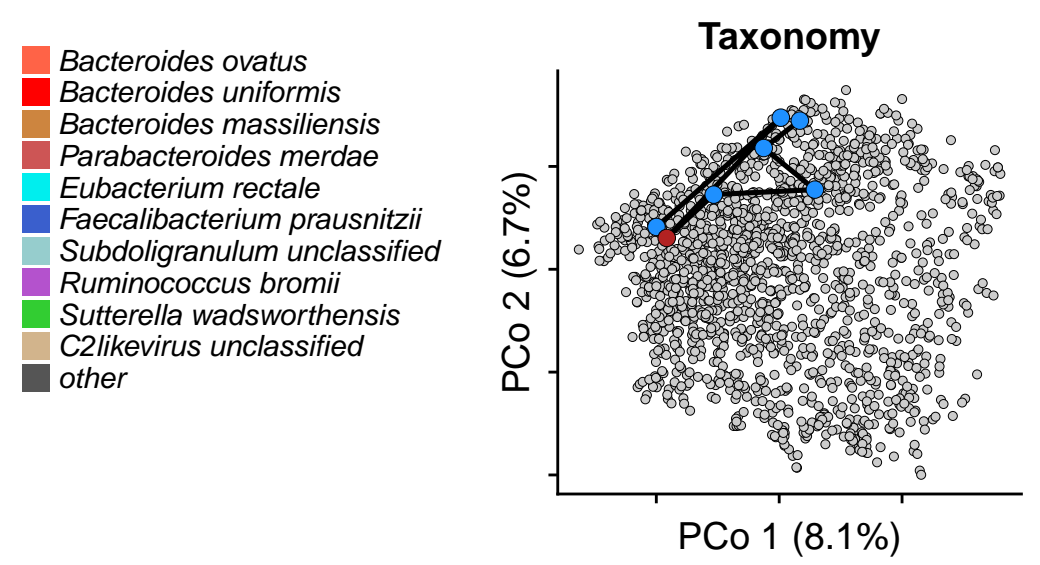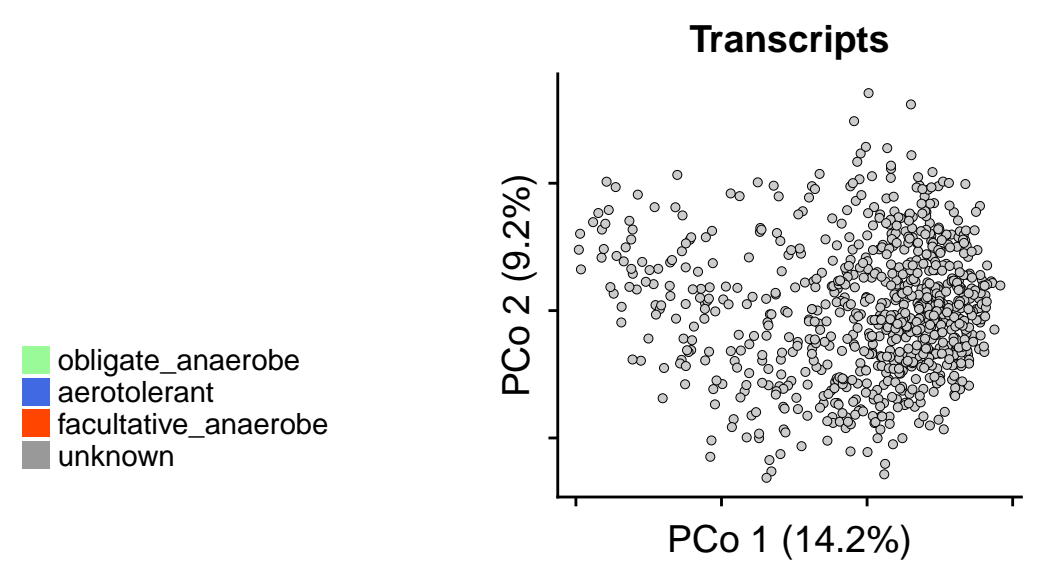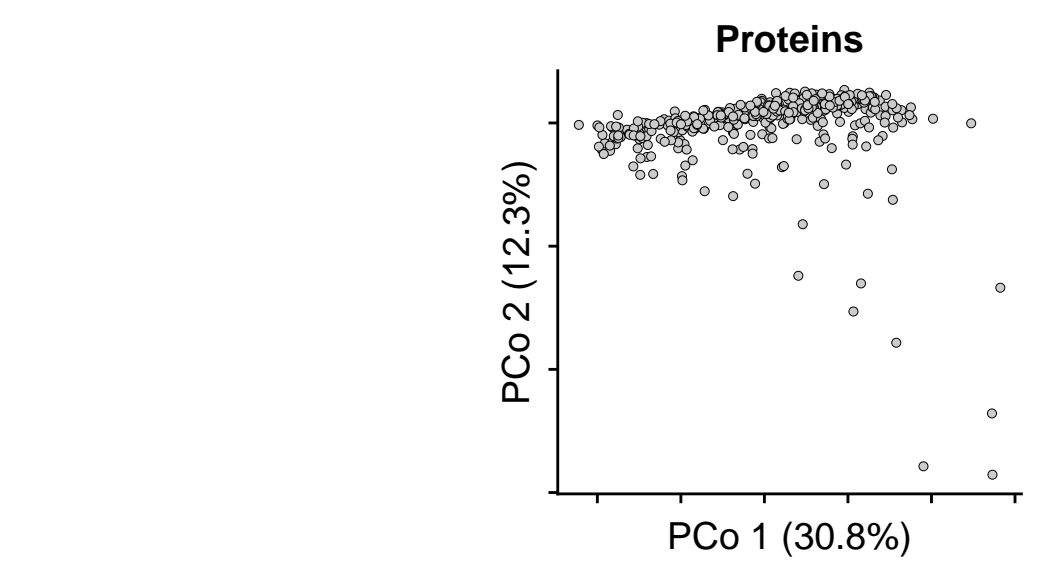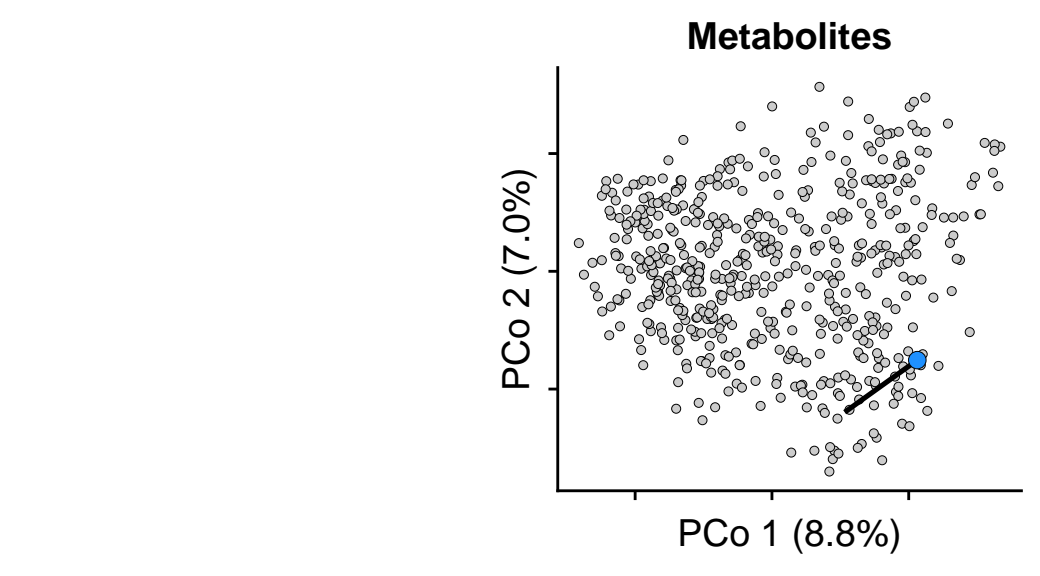

P6028: 9 Male White MGH Pediatrics | CD L1+L4

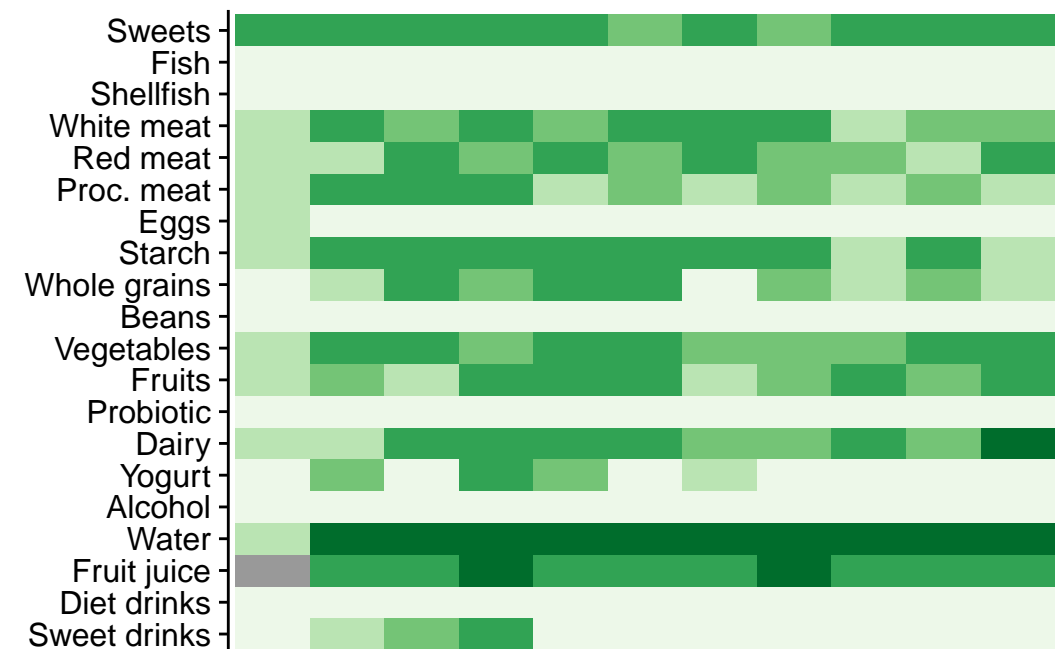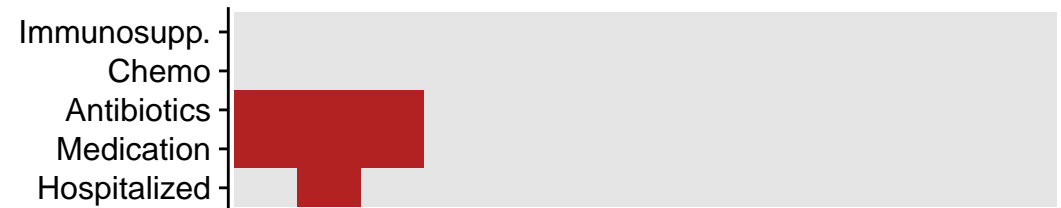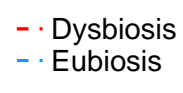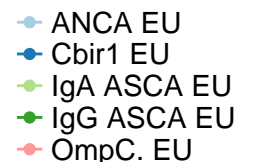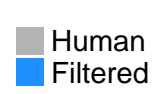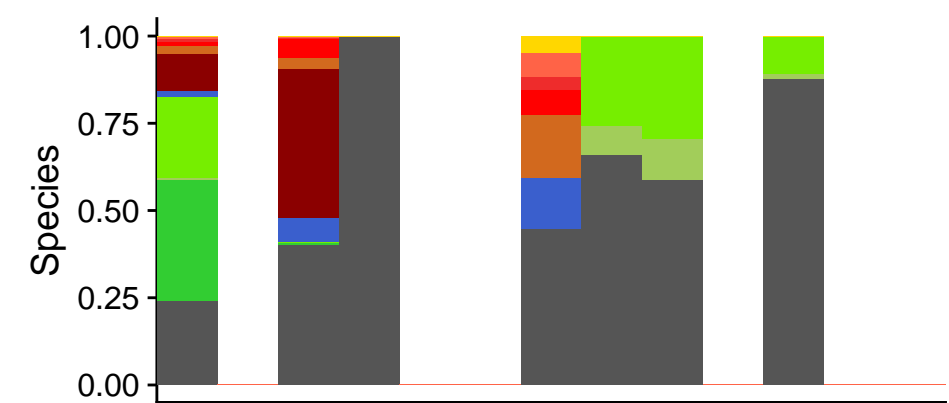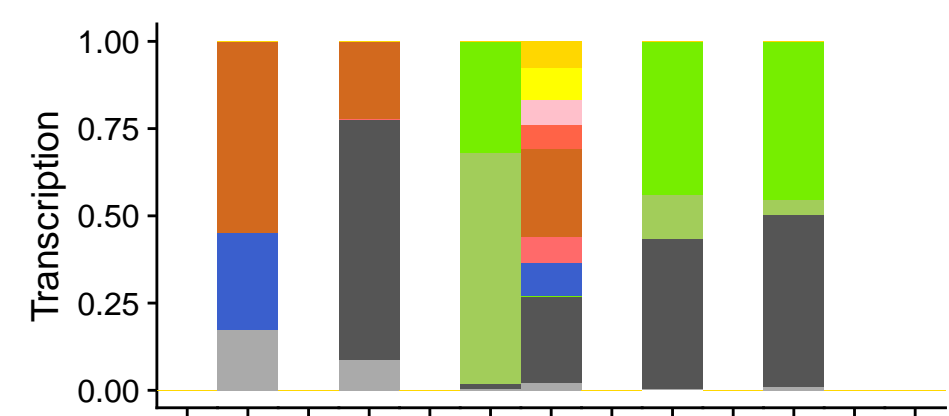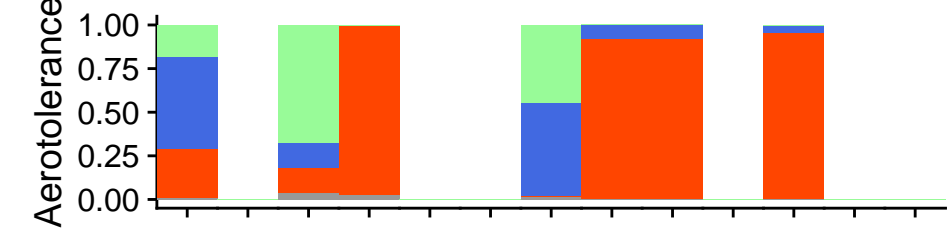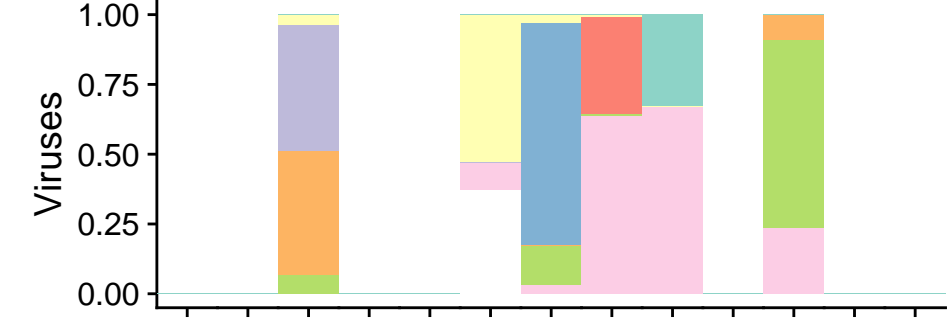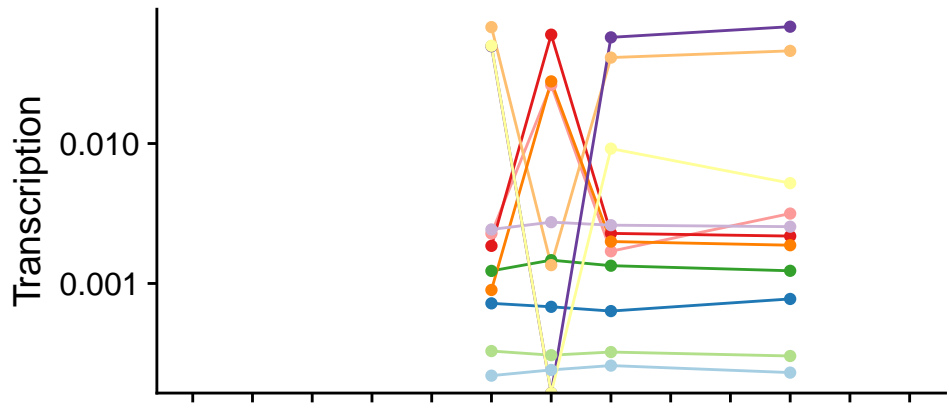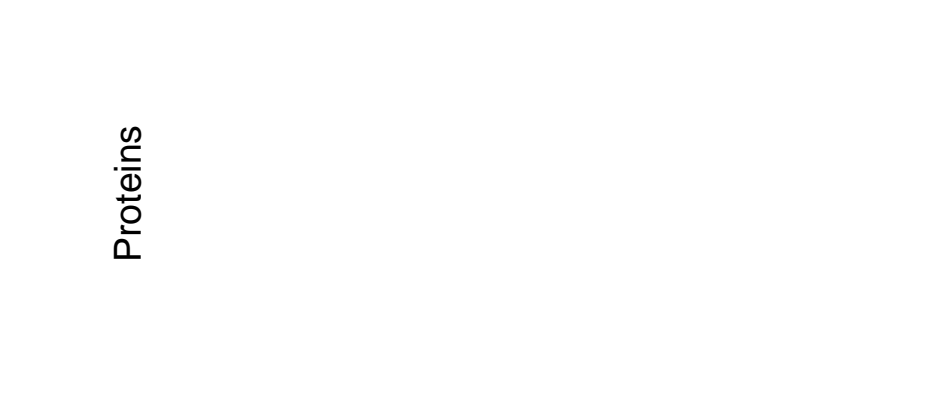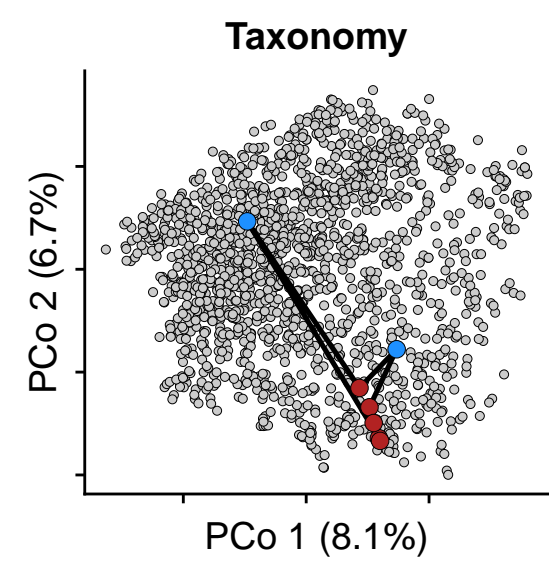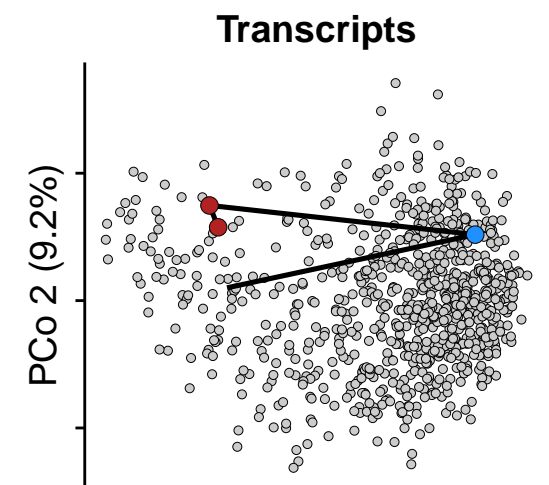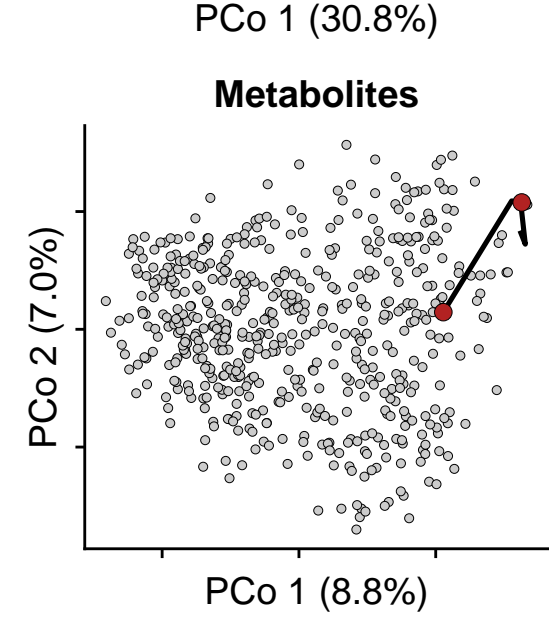

P6033: 15 Male White MGH Pediatrics | CD L3

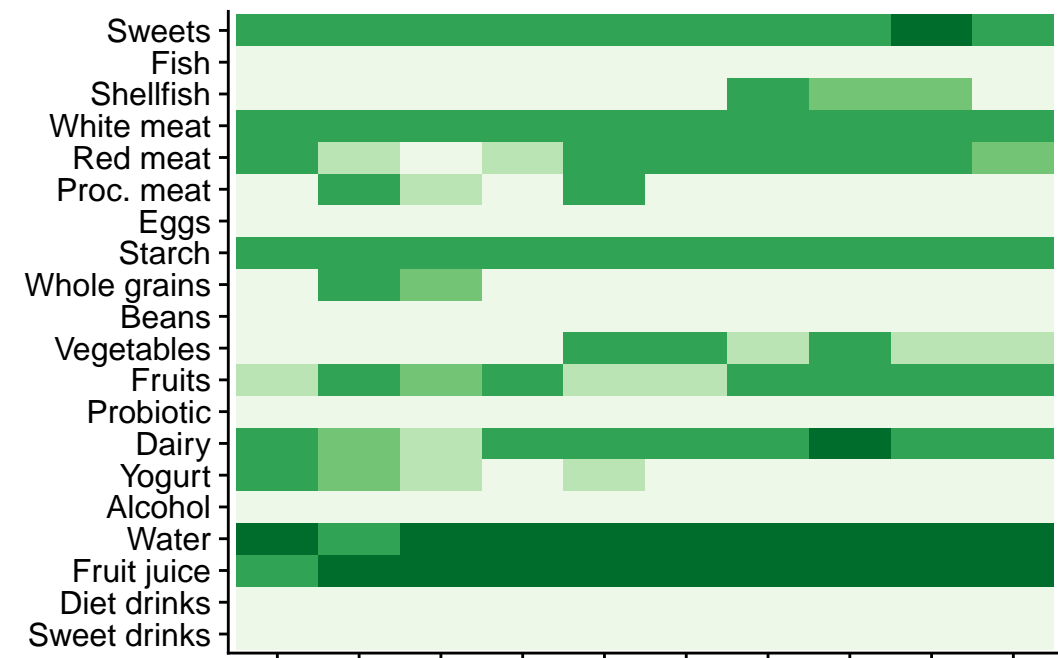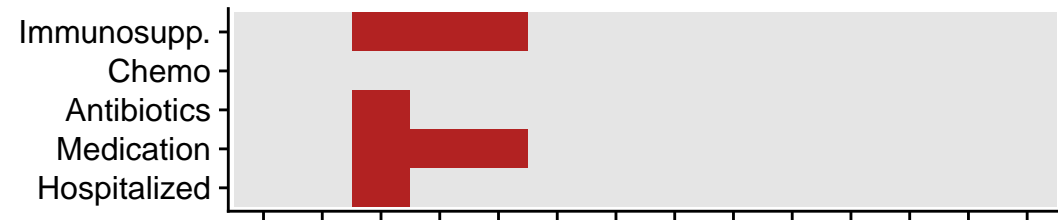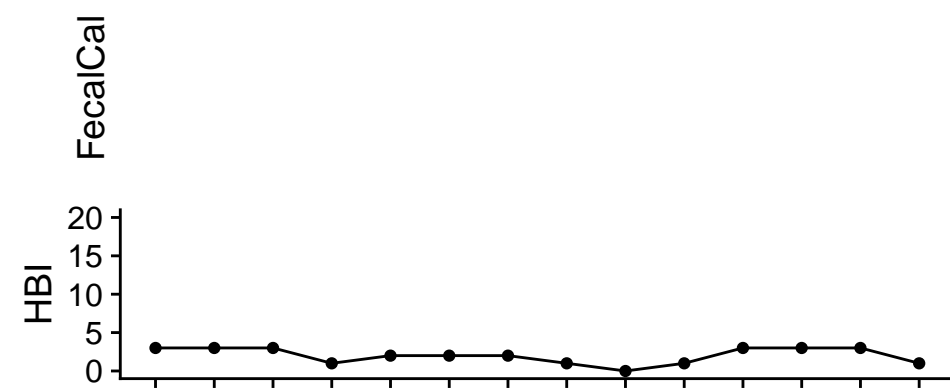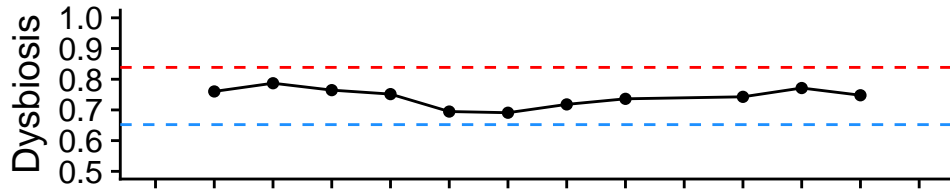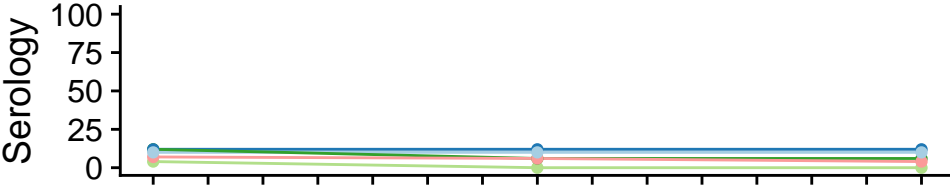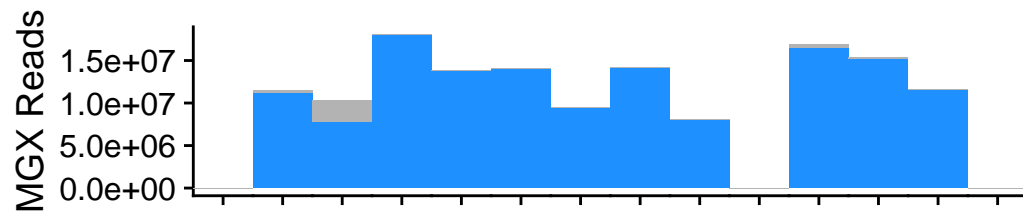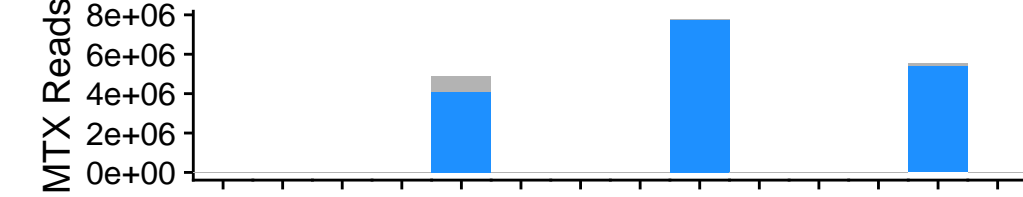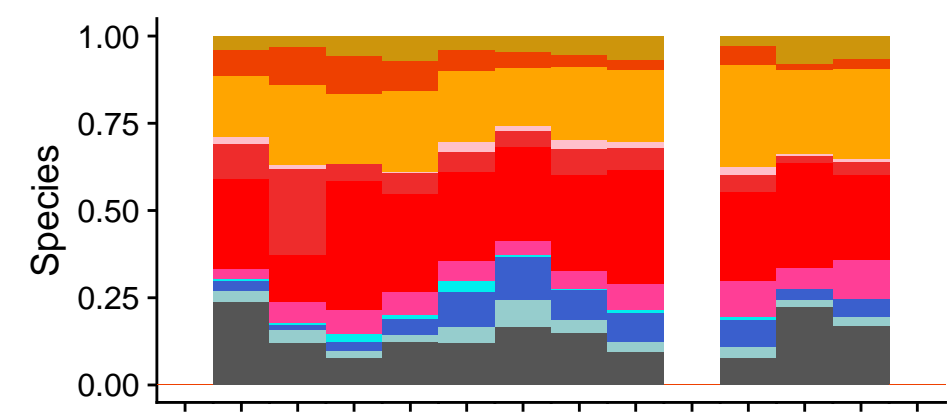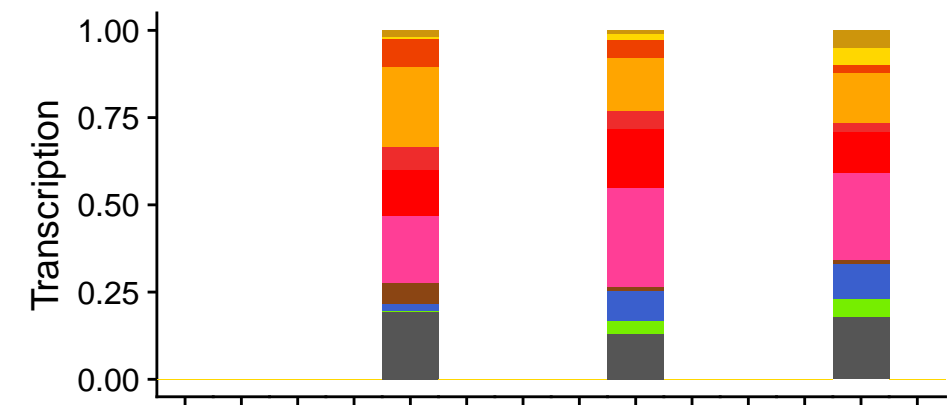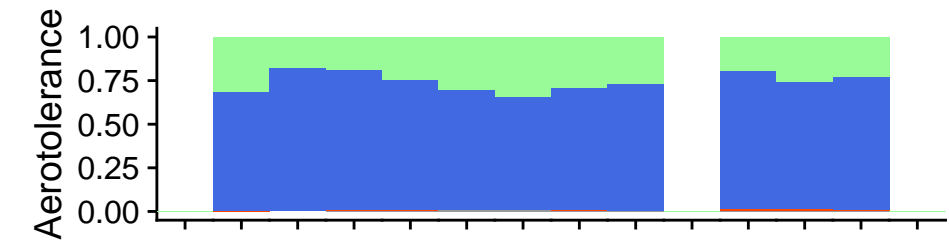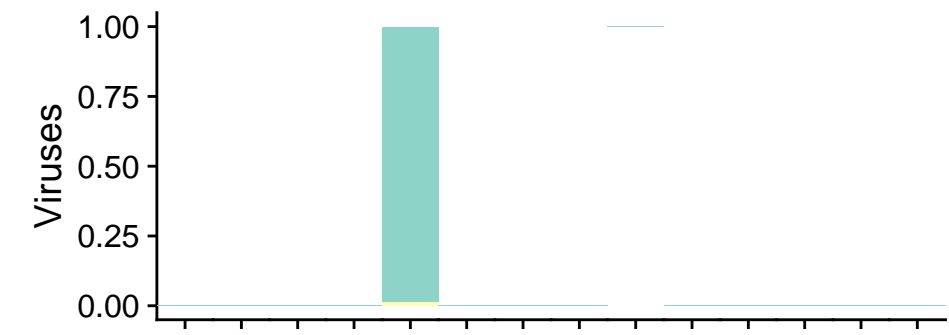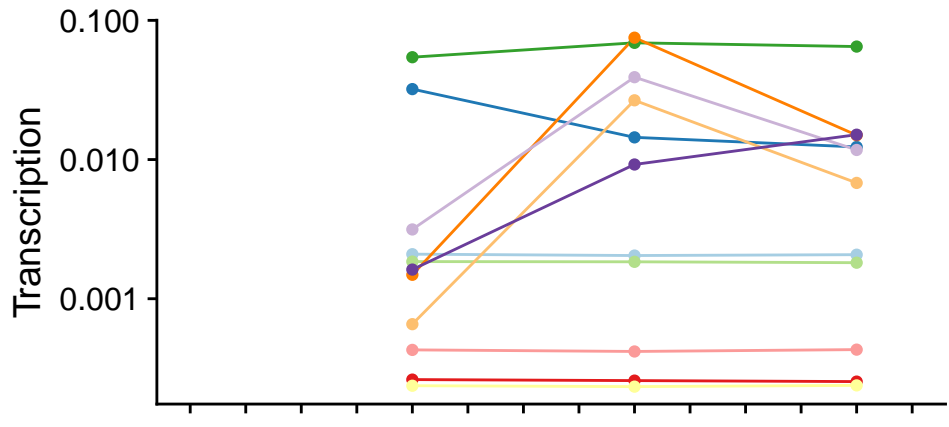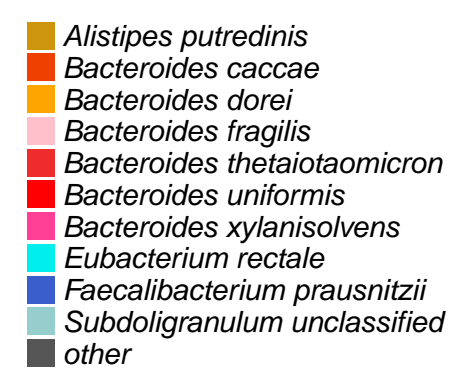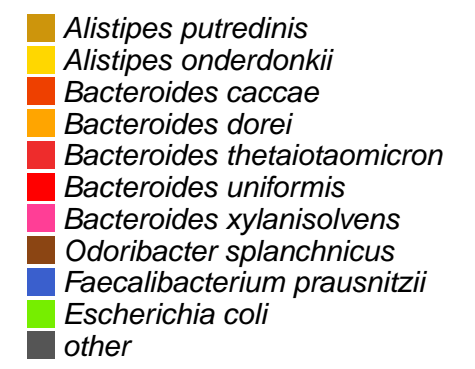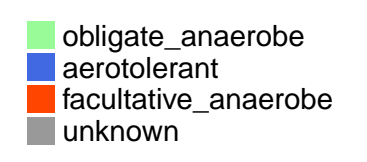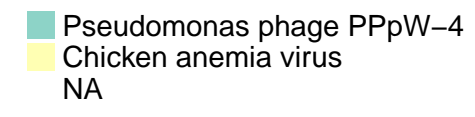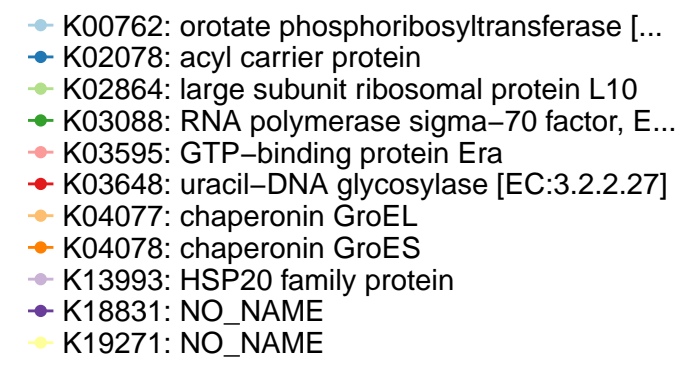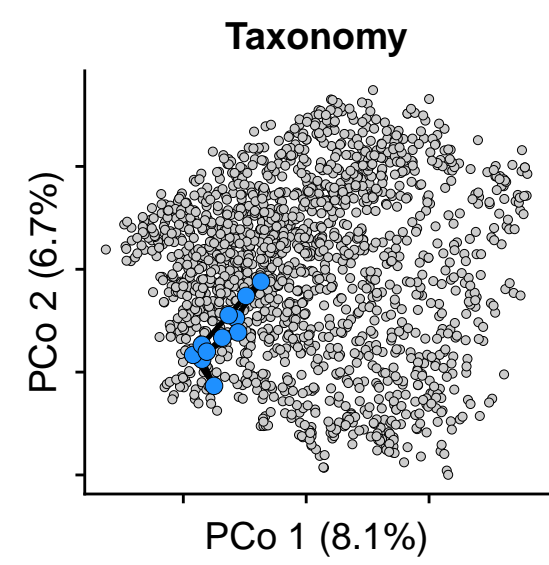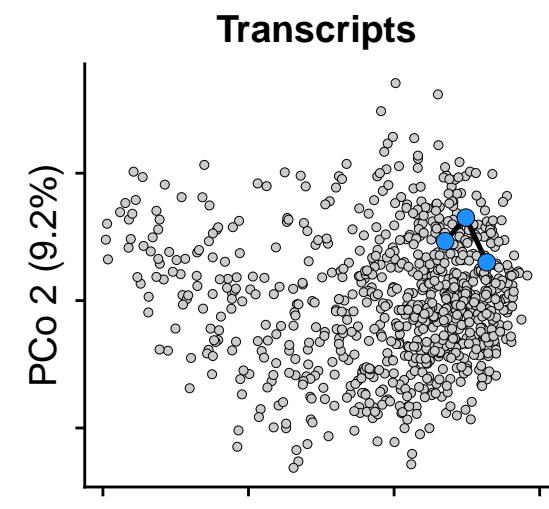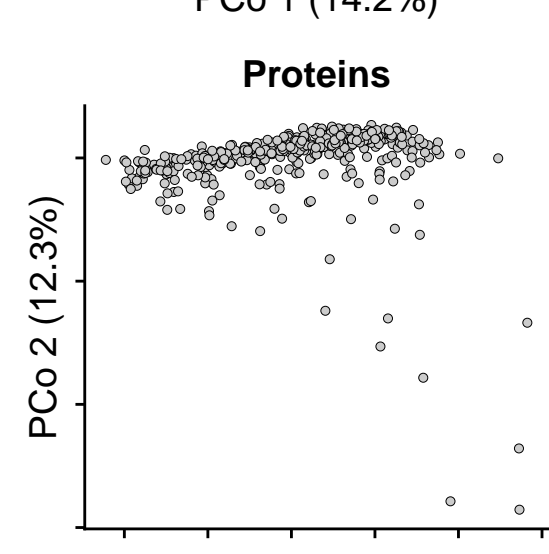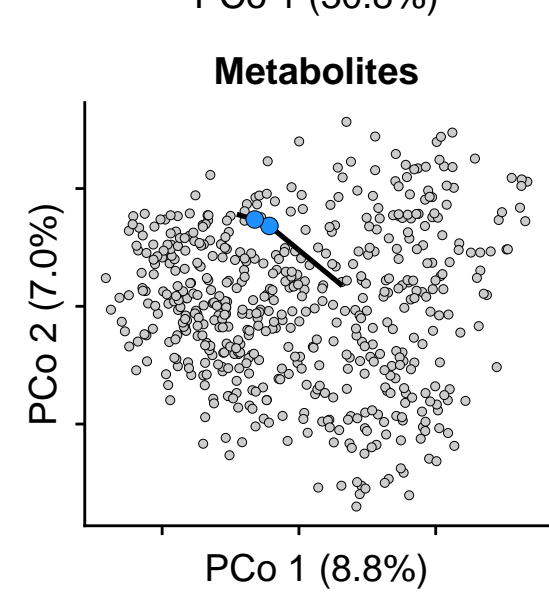

P6035: 16 Male White MGH Pediatrics | UC

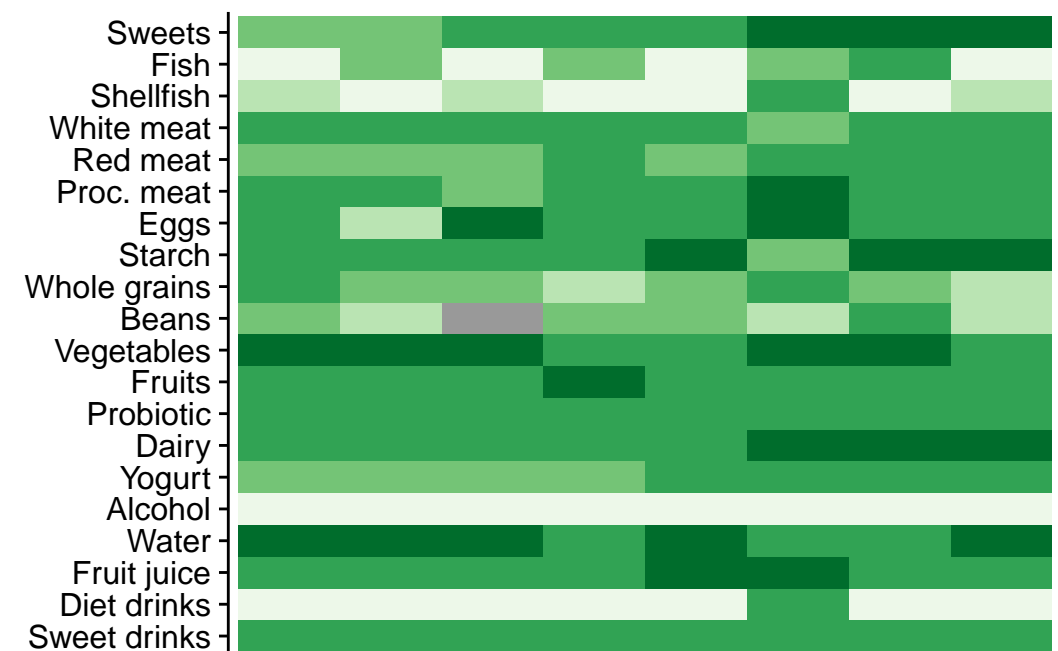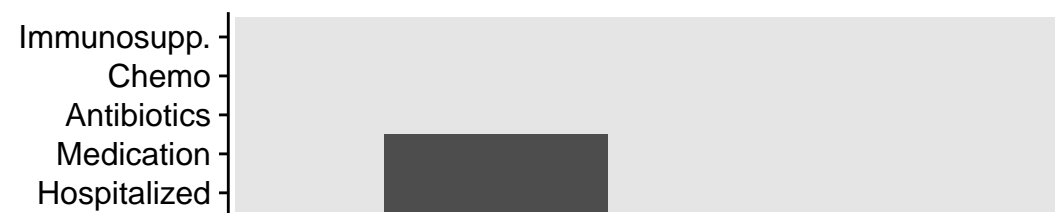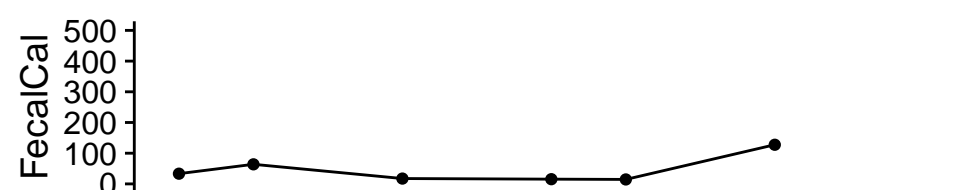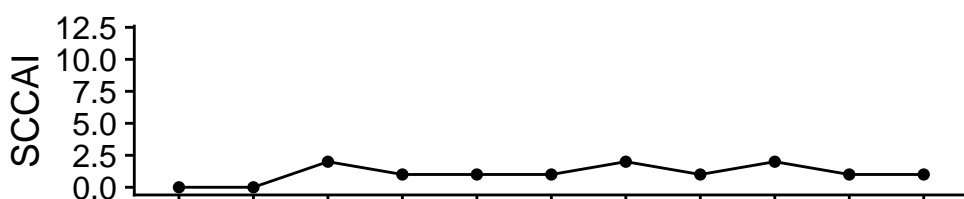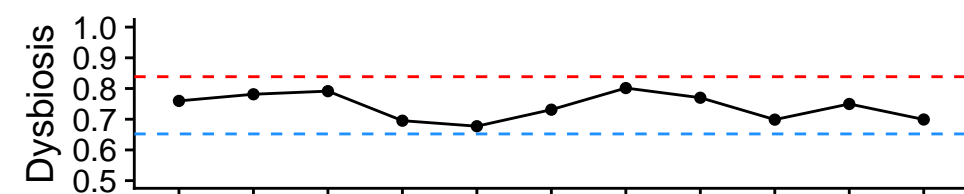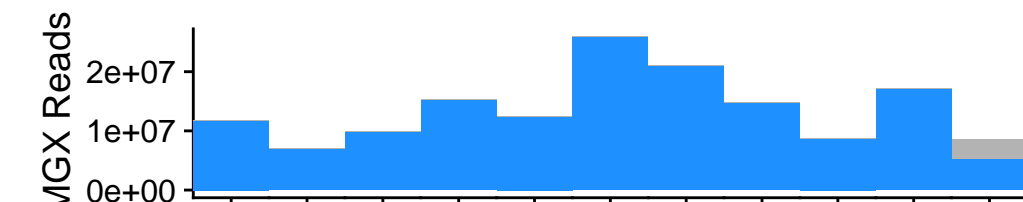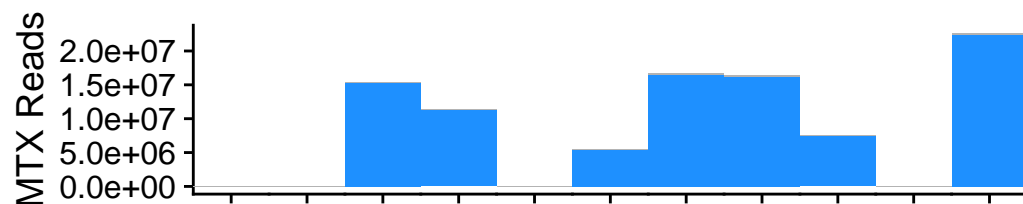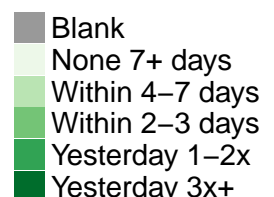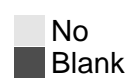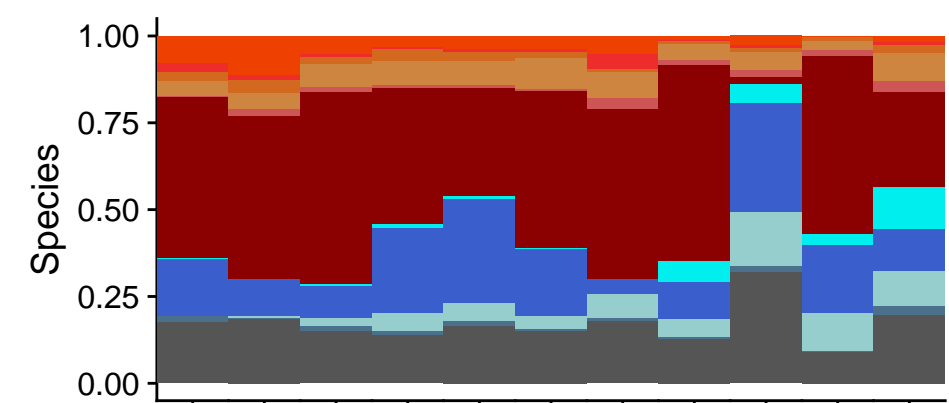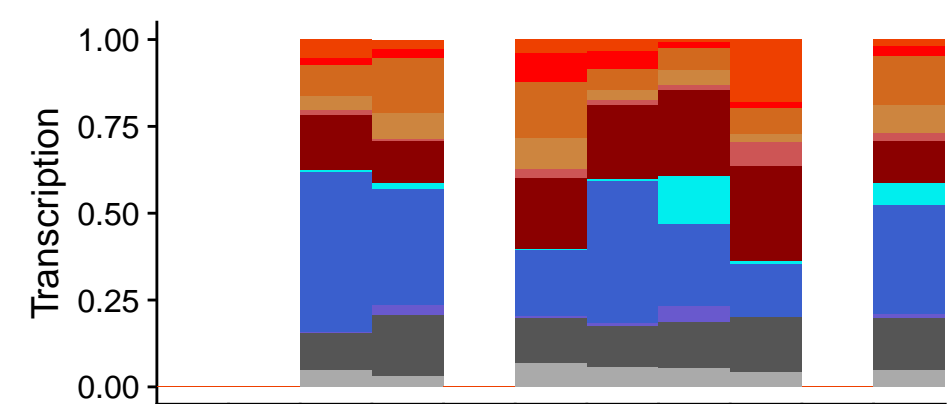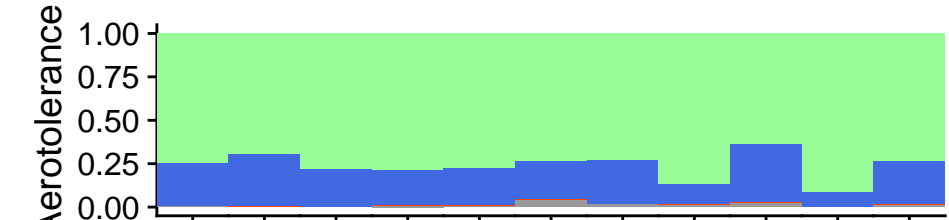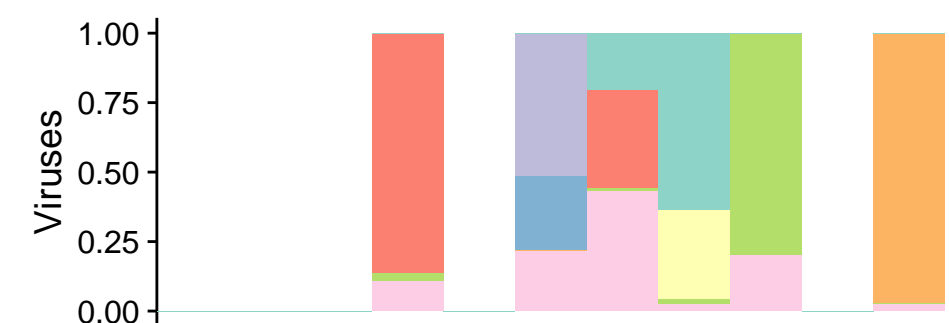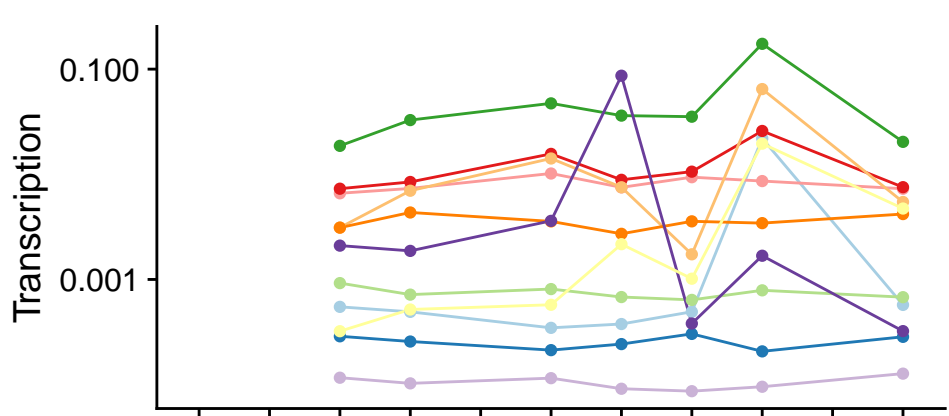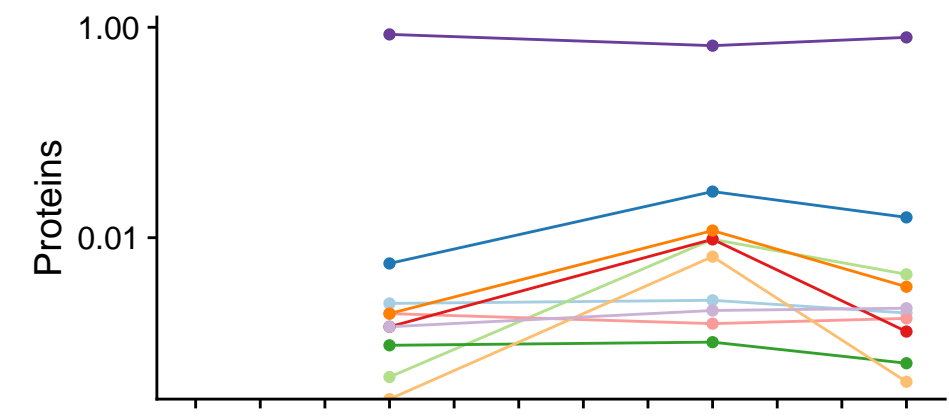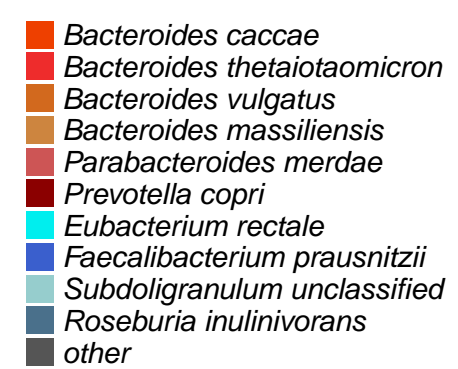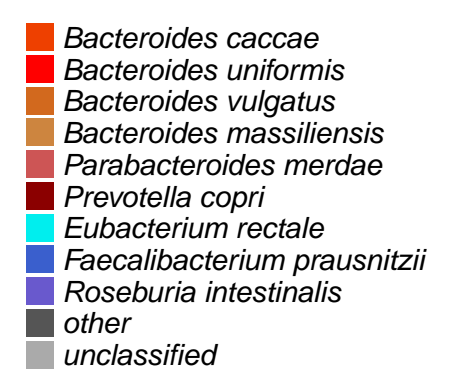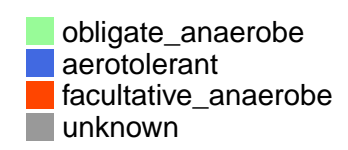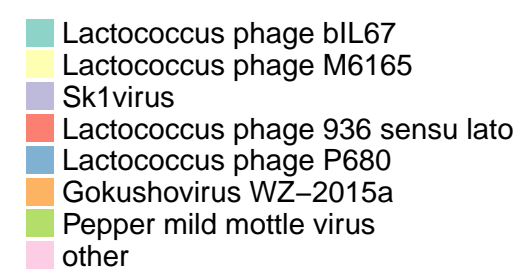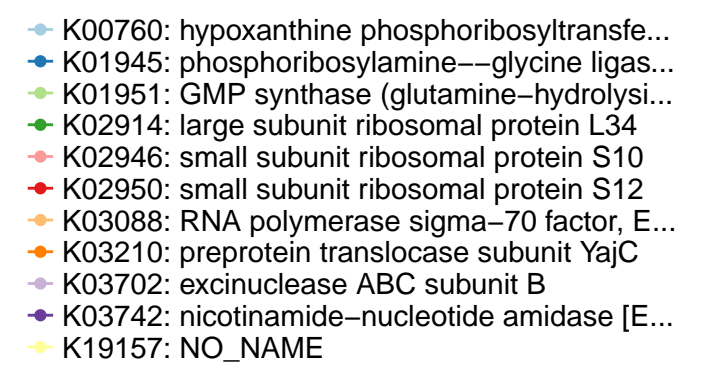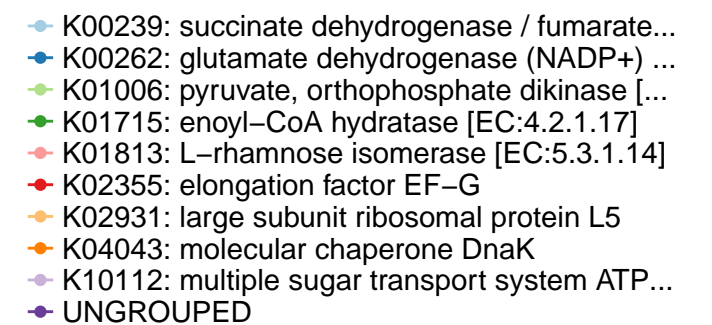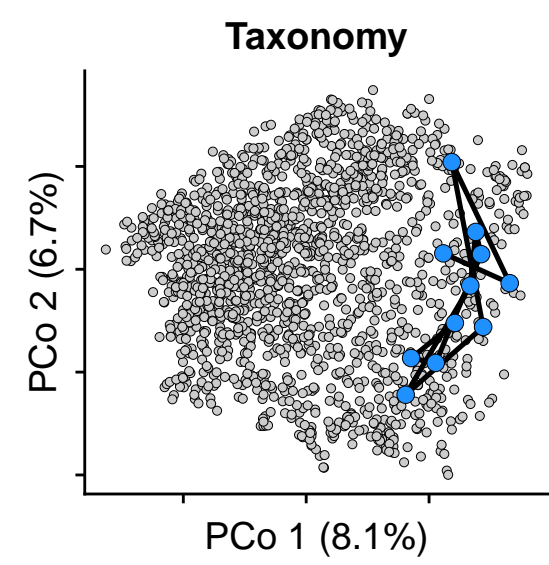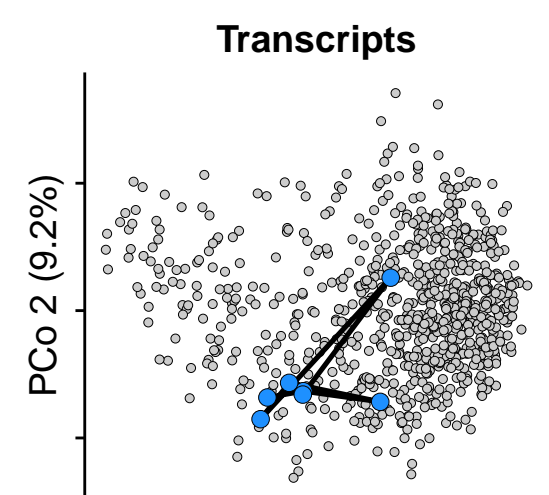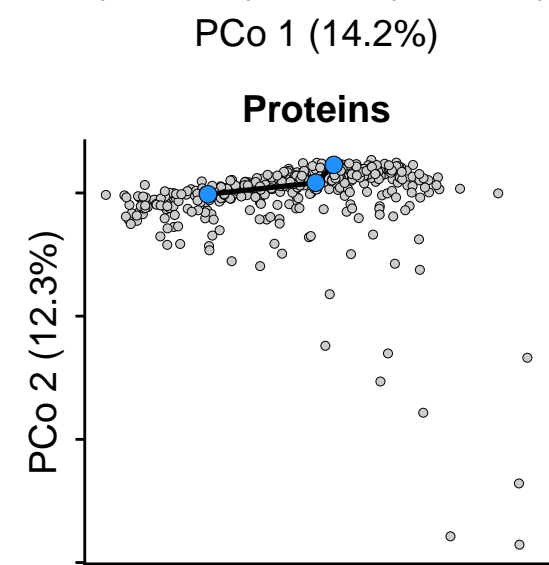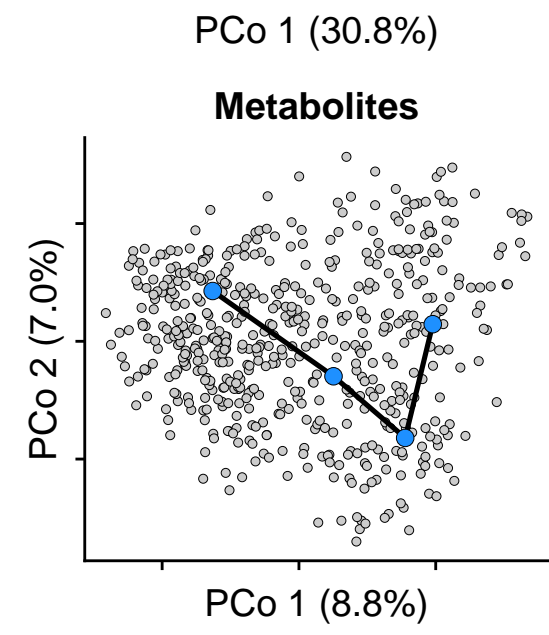

P6037: 15 Male White MGH Pediatrics | CD L3

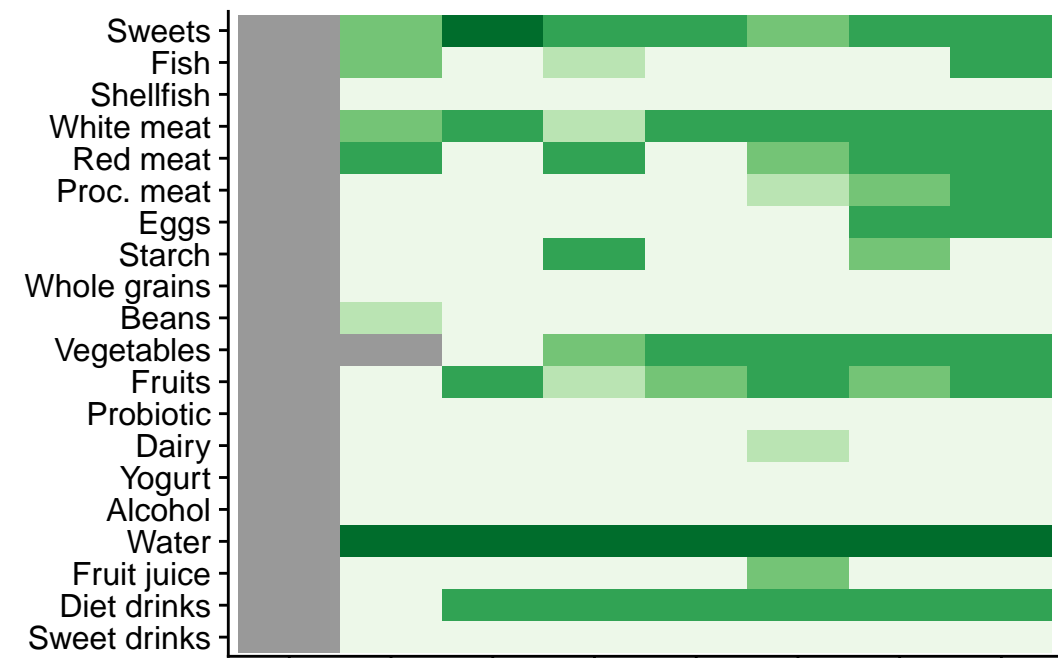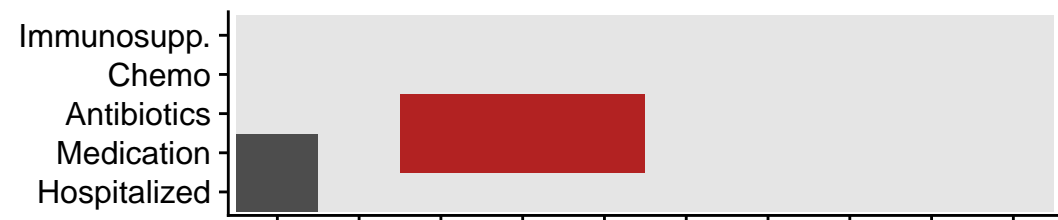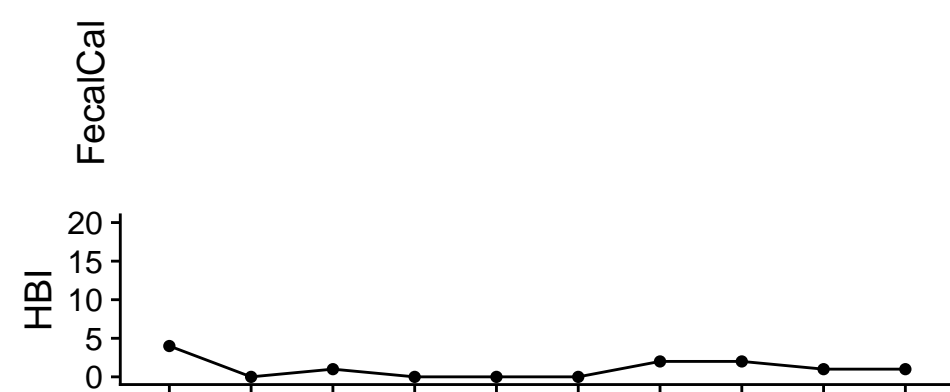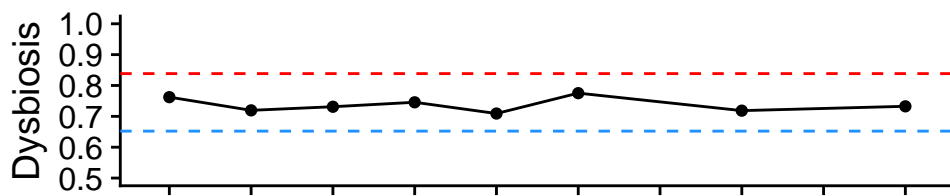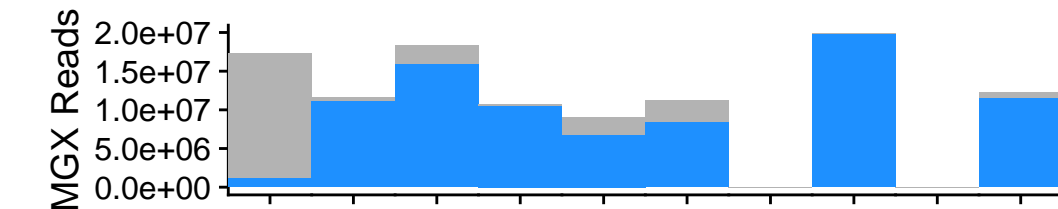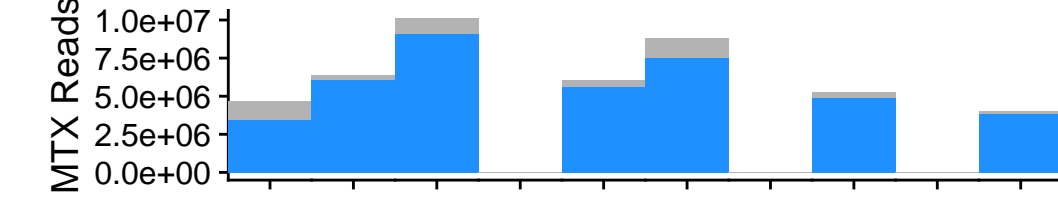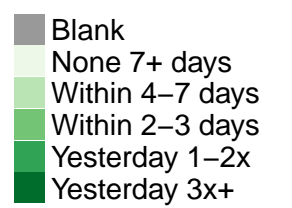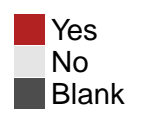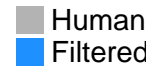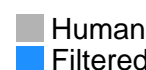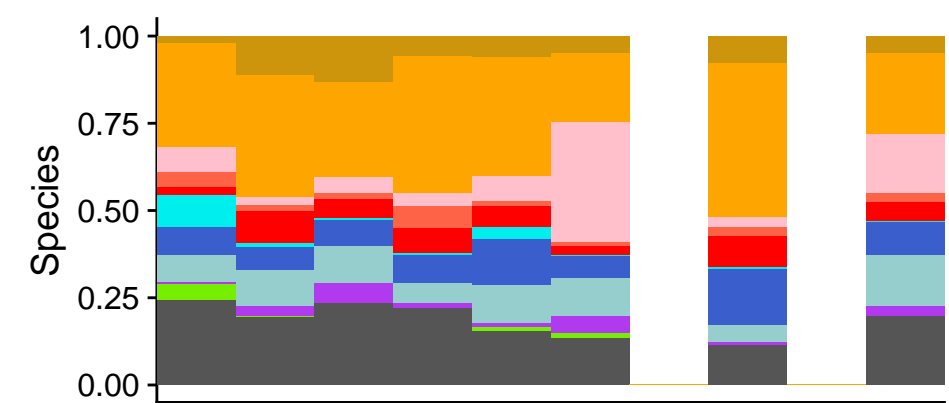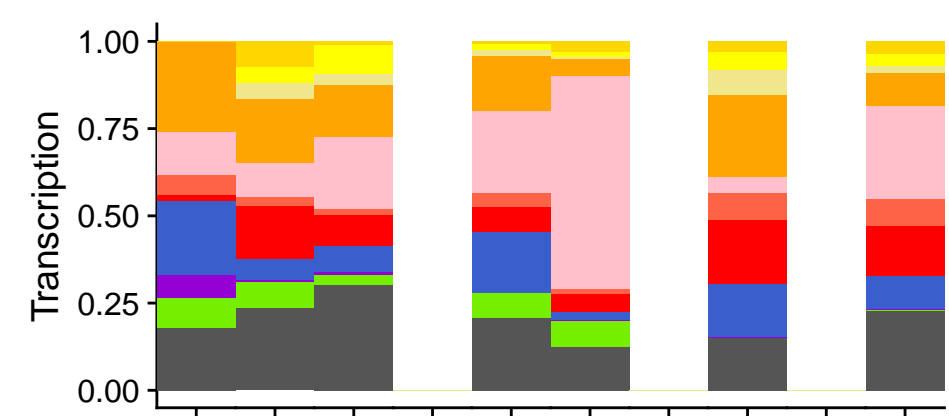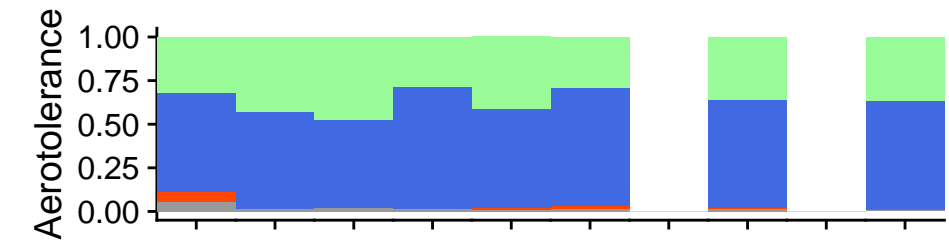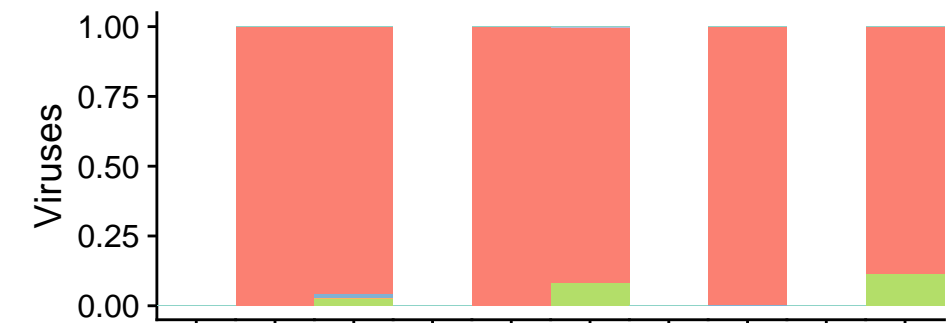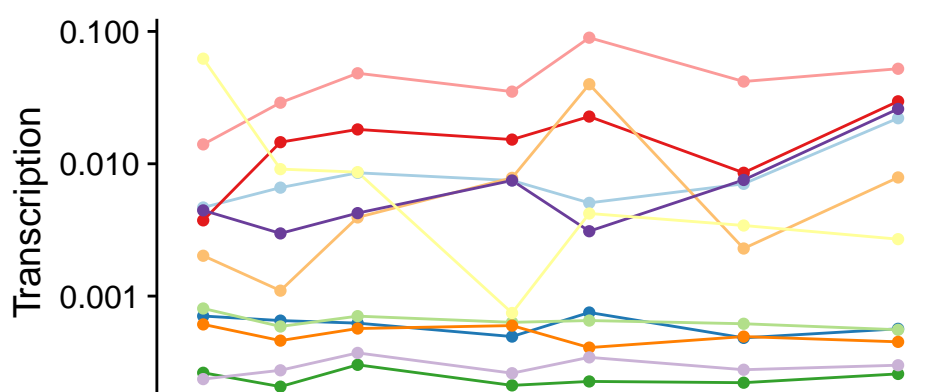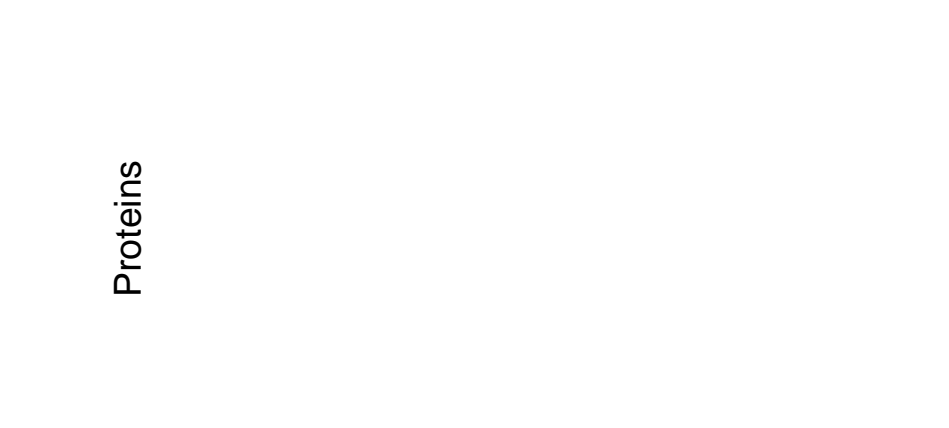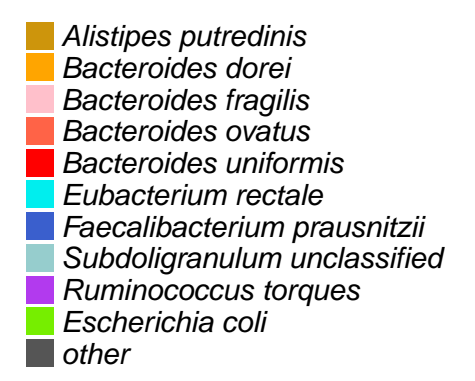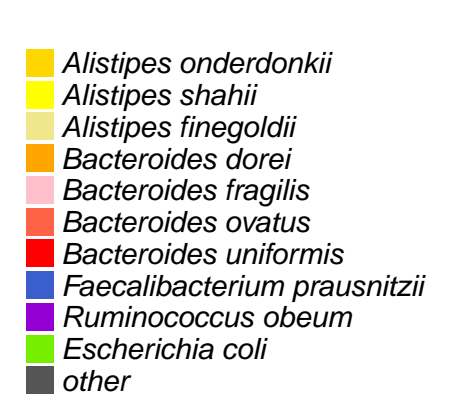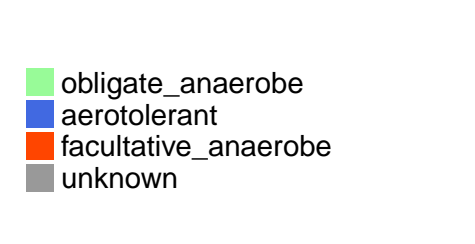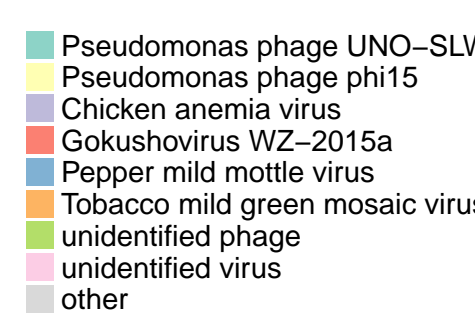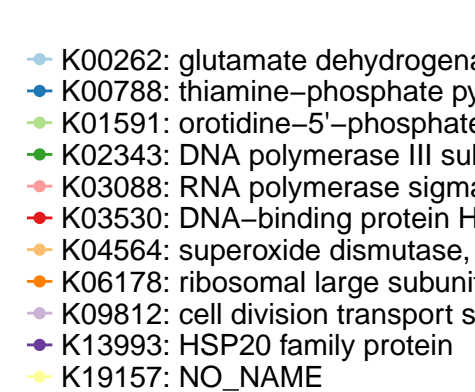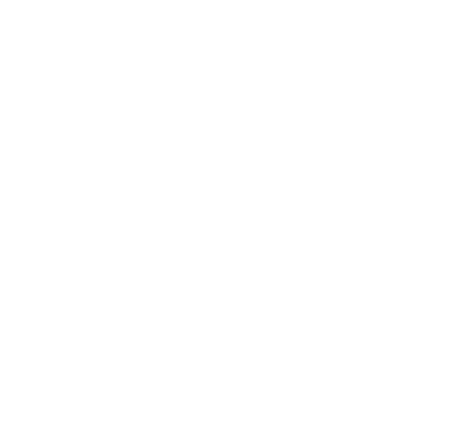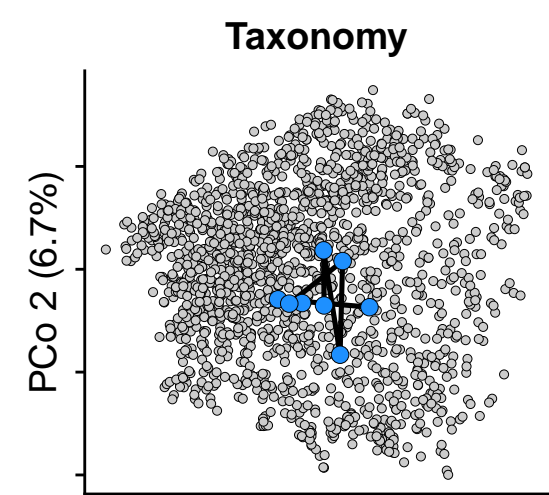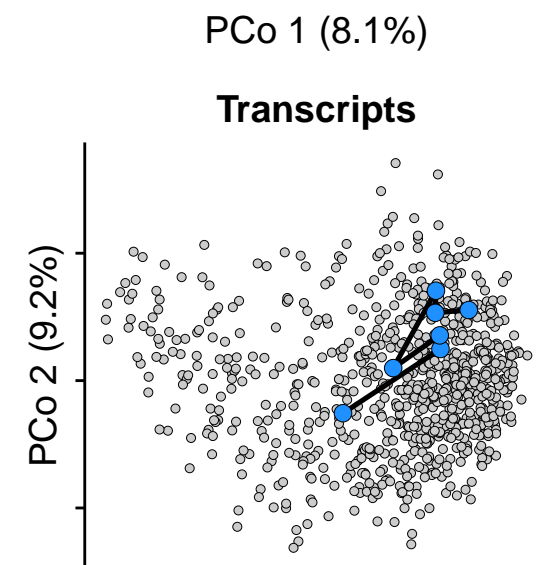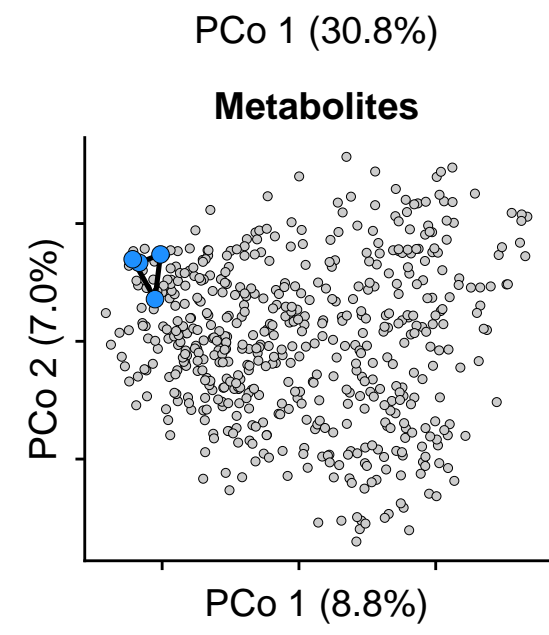

P6038: 16 Female White MGH Pediatrics | UC

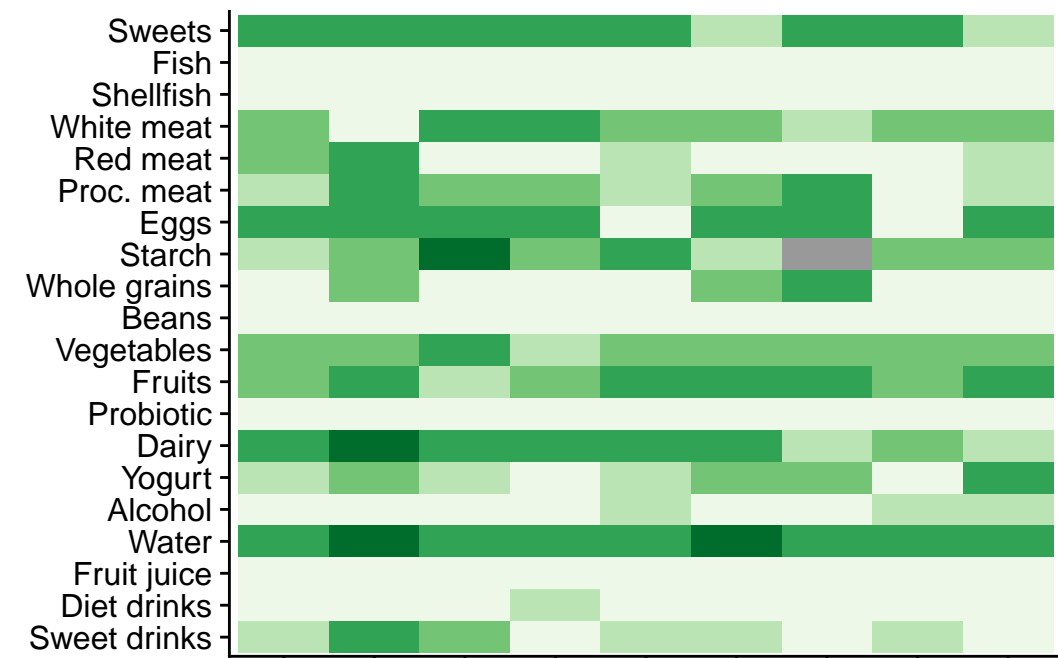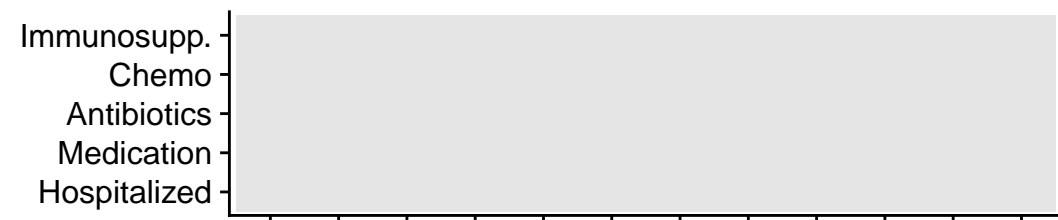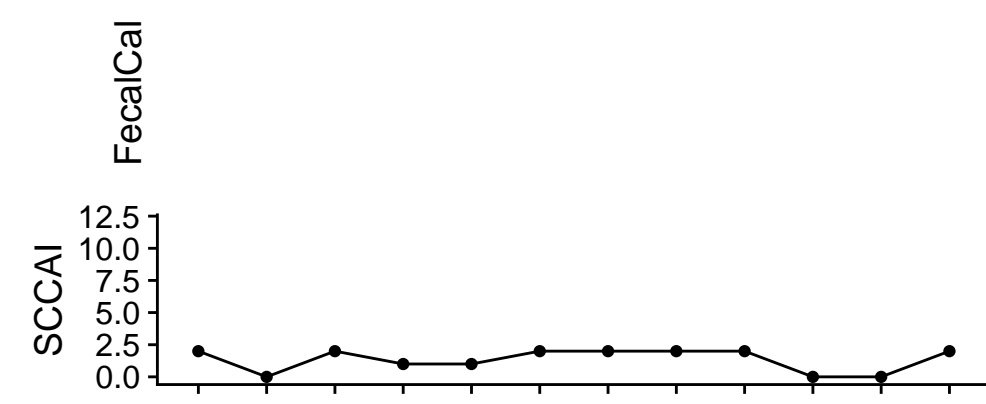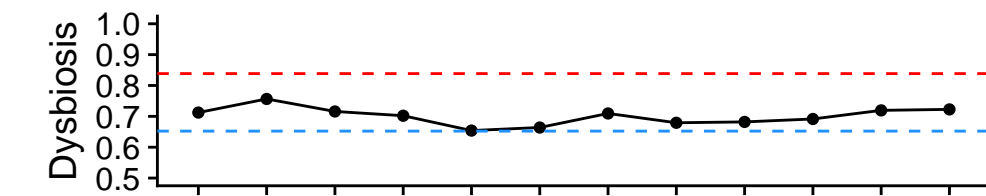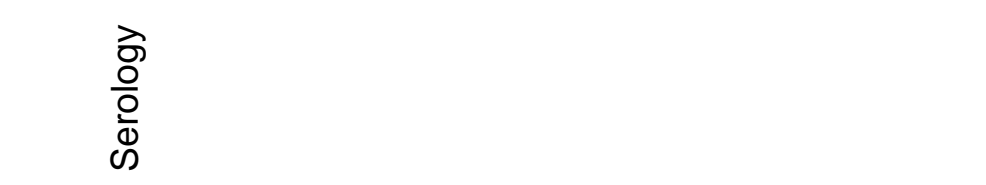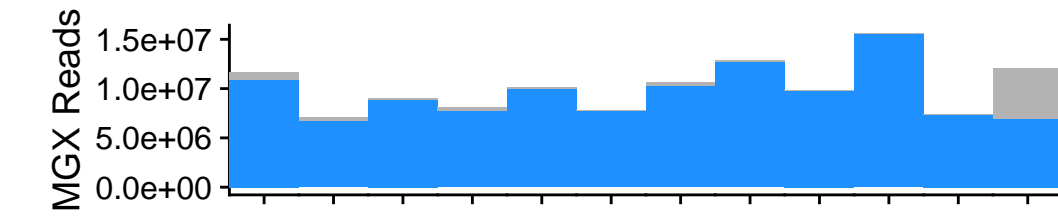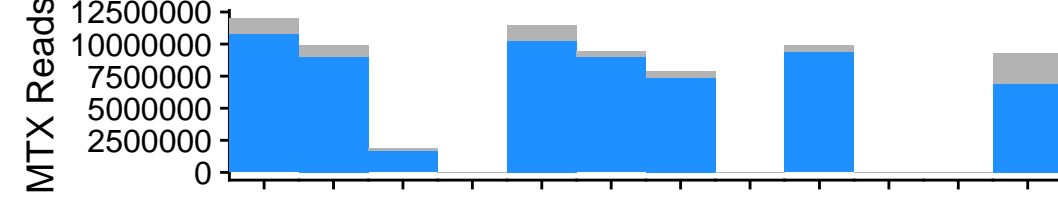

Blank  
None 7+ days  
Within 4-7 days  
Within 2-3 days  
Yesterday 1-2x  
Yesterday 3x+

No

Dysbiosis  
Eubiosis

Human  
Filtered

Human  
Filtered

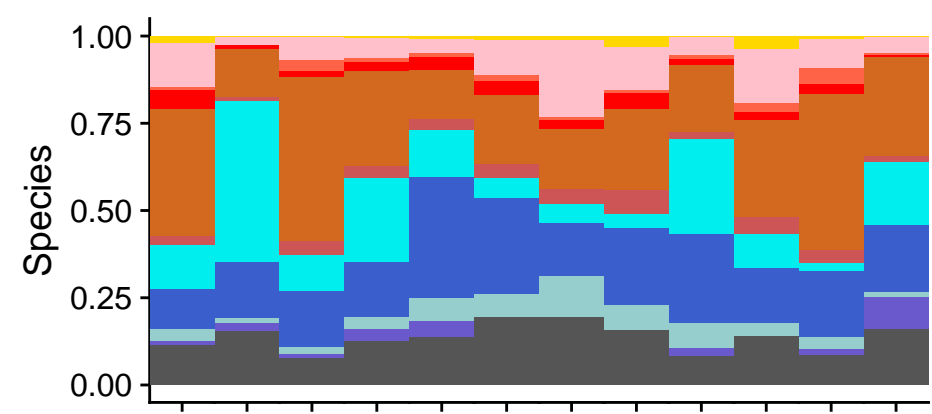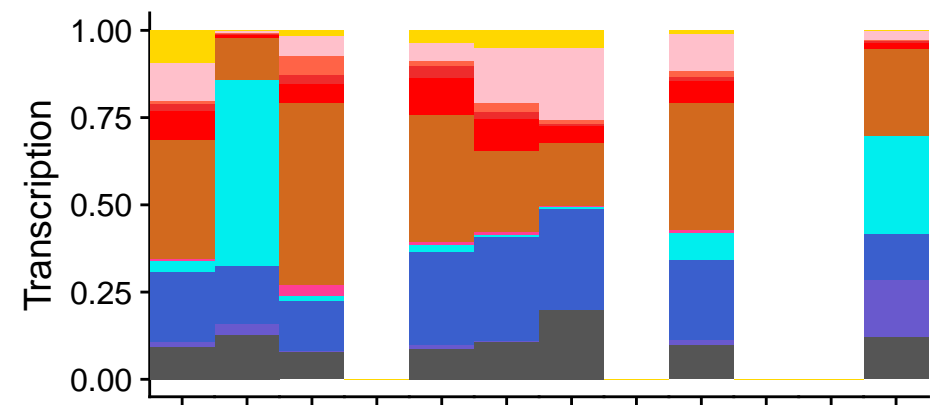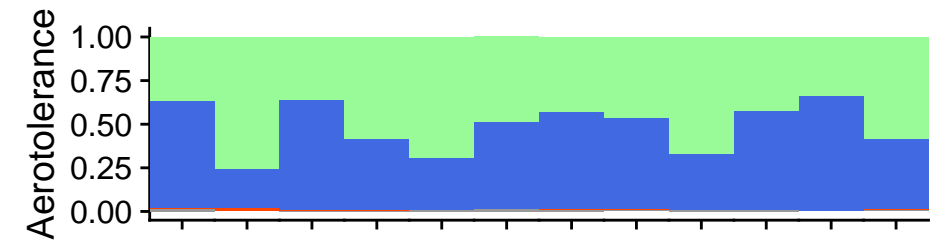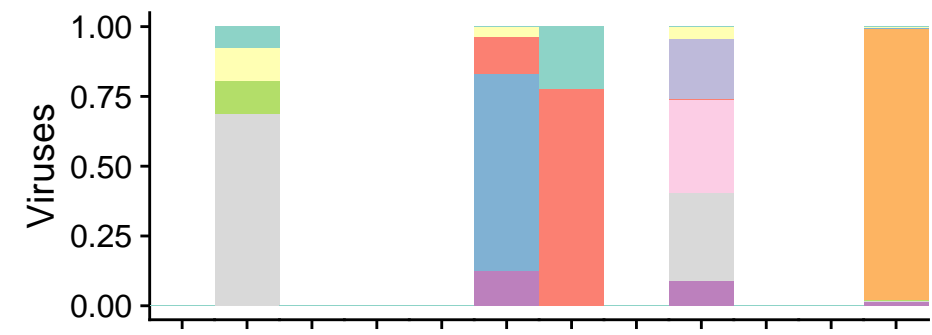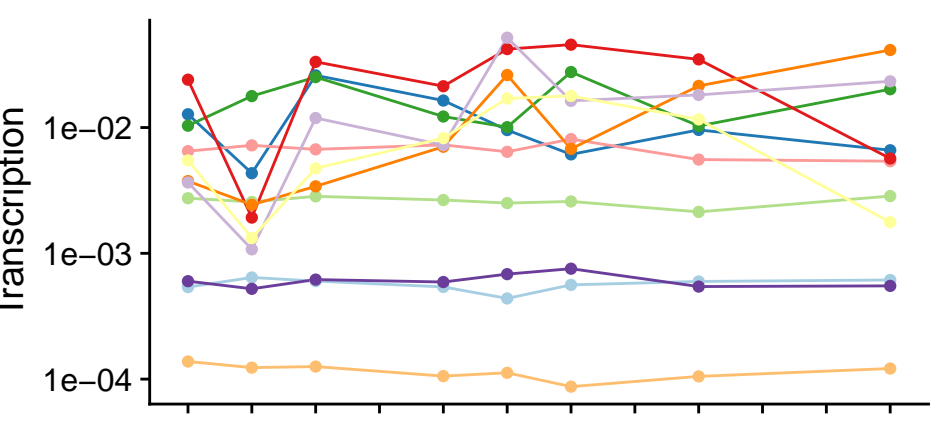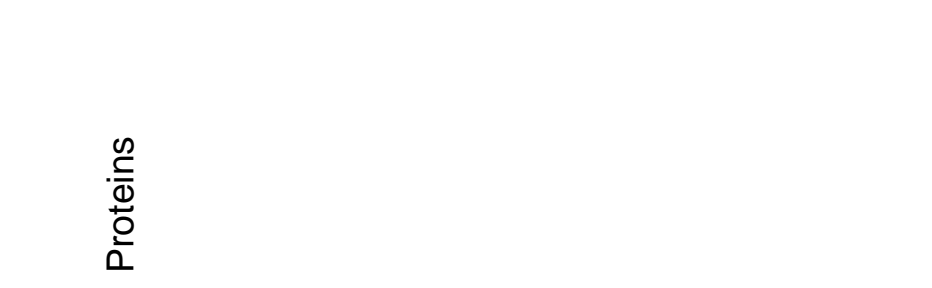

Alistipes onderdonkii  
Bacteroides fragilis  
Bacteroides ovatus  
Bacteroides uniformis  
Bacteroides vulgatus  
Parabacteroides merdae  
Eubacterium rectale  
Faecalibacterium prausnitzii  
Subdoligranulum unclassified  
Roseburia intestinalis  
other

Alistipes onderdonkii  
Bacteroides fragilis  
Bacteroides ovatus  
Bacteroides thetaiotaomicron  
Bacteroides uniformis  
Bacteroides vulgatus  
Bacteroides xylanisolvens  
Eubacterium rectale  
Faecalibacterium prausnitzii  
Roseburia intestinalis  
other

obligate anaerobe  
aerotolerant  
facultative anaerobe  
unknown

T7virus  
Pseudomonas phage PPpW-4  
unclassified C2likevirus  
unclassified Siphoviridae  
Gokushovirus WZ-2015a  
Parabacteroides phage YZ-2015b  
Melon necrotic spot virus  
Bell pepper mottle virus  
Pepper mild mottle virus  
other

K01647: citrate synthase [EC:2.3.3.1]  
K02078: acyl carrier protein  
K02356: elongation factor EF-P  
K02914: large subunit ribosomal protein L34  
K02965: small subunit ribosomal protein S19  
K03088: RNA polymerase sigma-70 factor, E...  
K03665: GTP-binding protein HflX  
K04078: chaperonin GroES  
K13993: HSP20 family protein  
K14441: NO\_NAME  
K19157: NO\_NAME

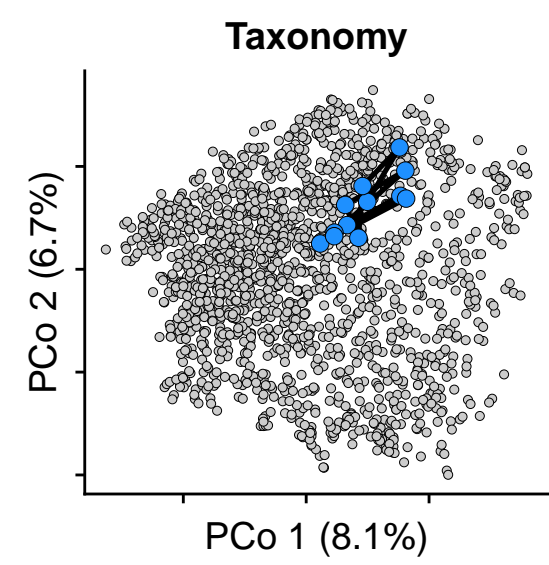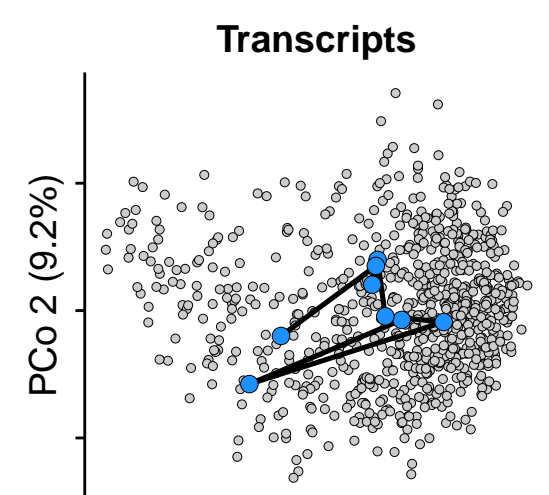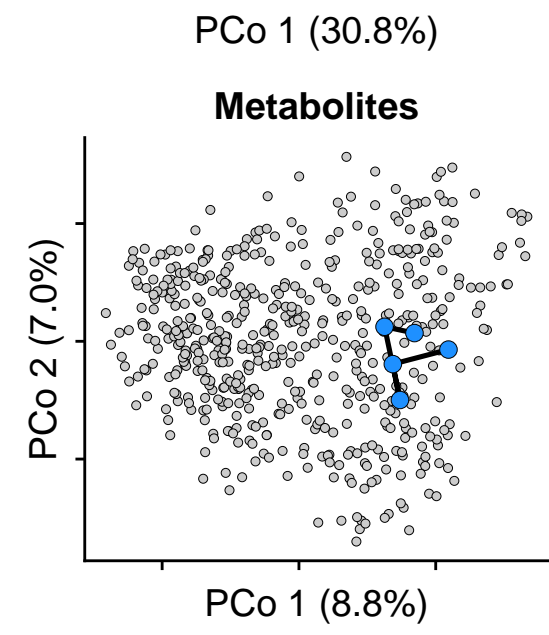

Supplement: 41586_2019_1237_MOESM4_ESM.pdf [file 41586_2019_1237_MOESM4_ESM.pdf]
