# Supplementary material
Source: PubMed Central journal article supplement (PMC6784872)

# Abdominal mass (per site\_sub\_coll)

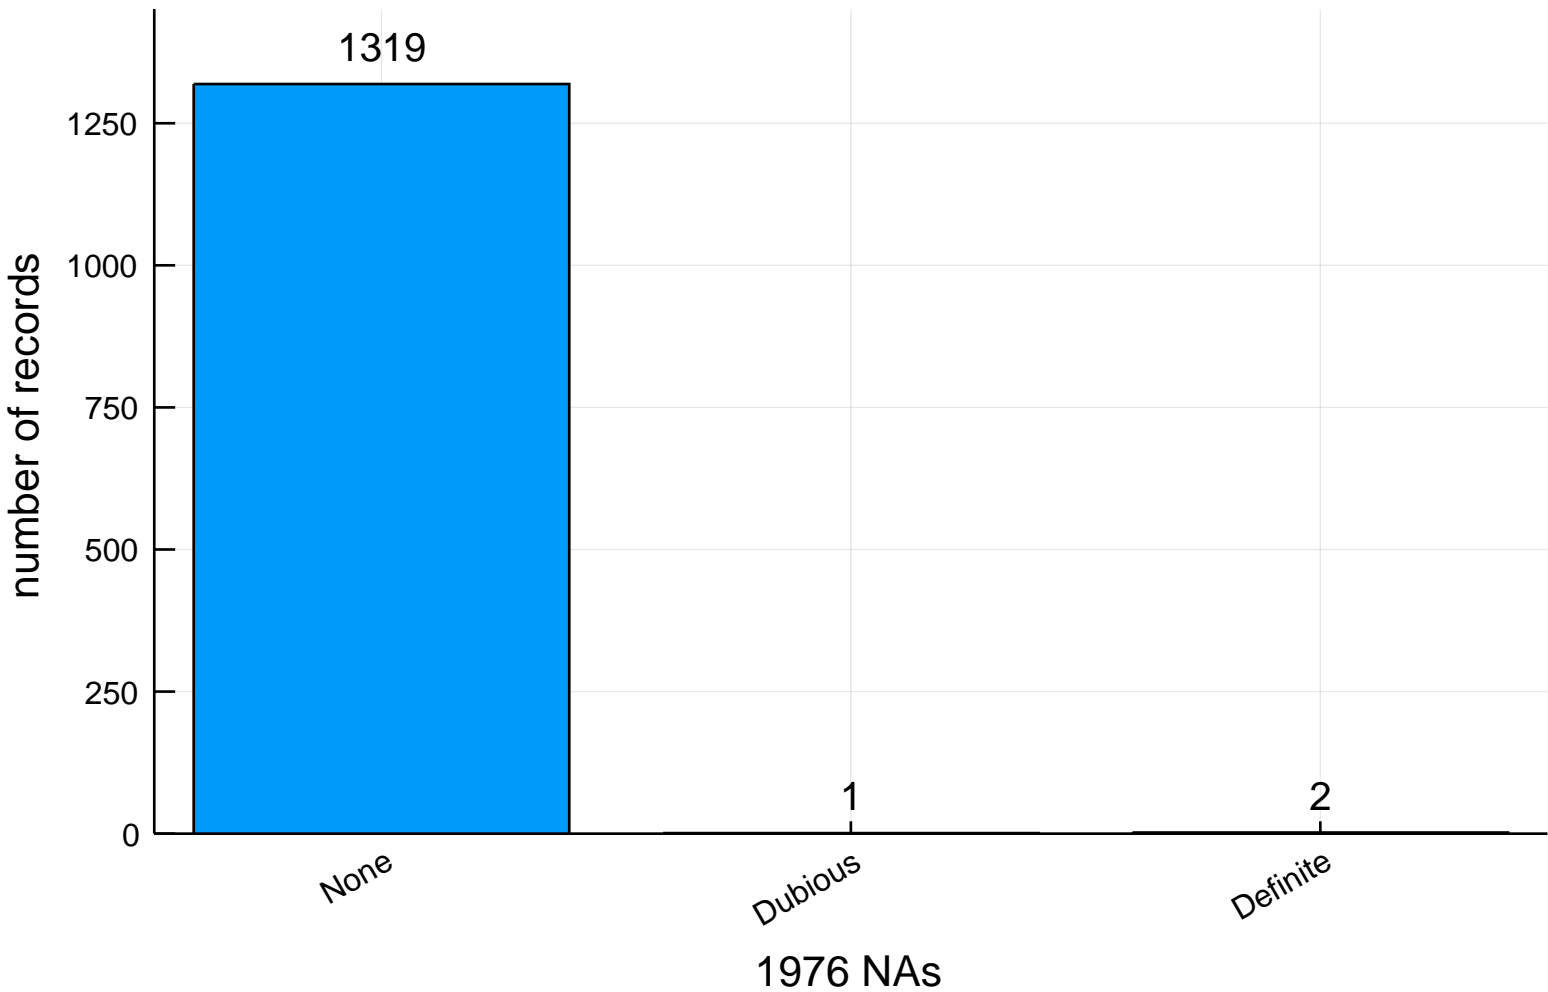

# Abdominal pain (per site\_sub\_coll)

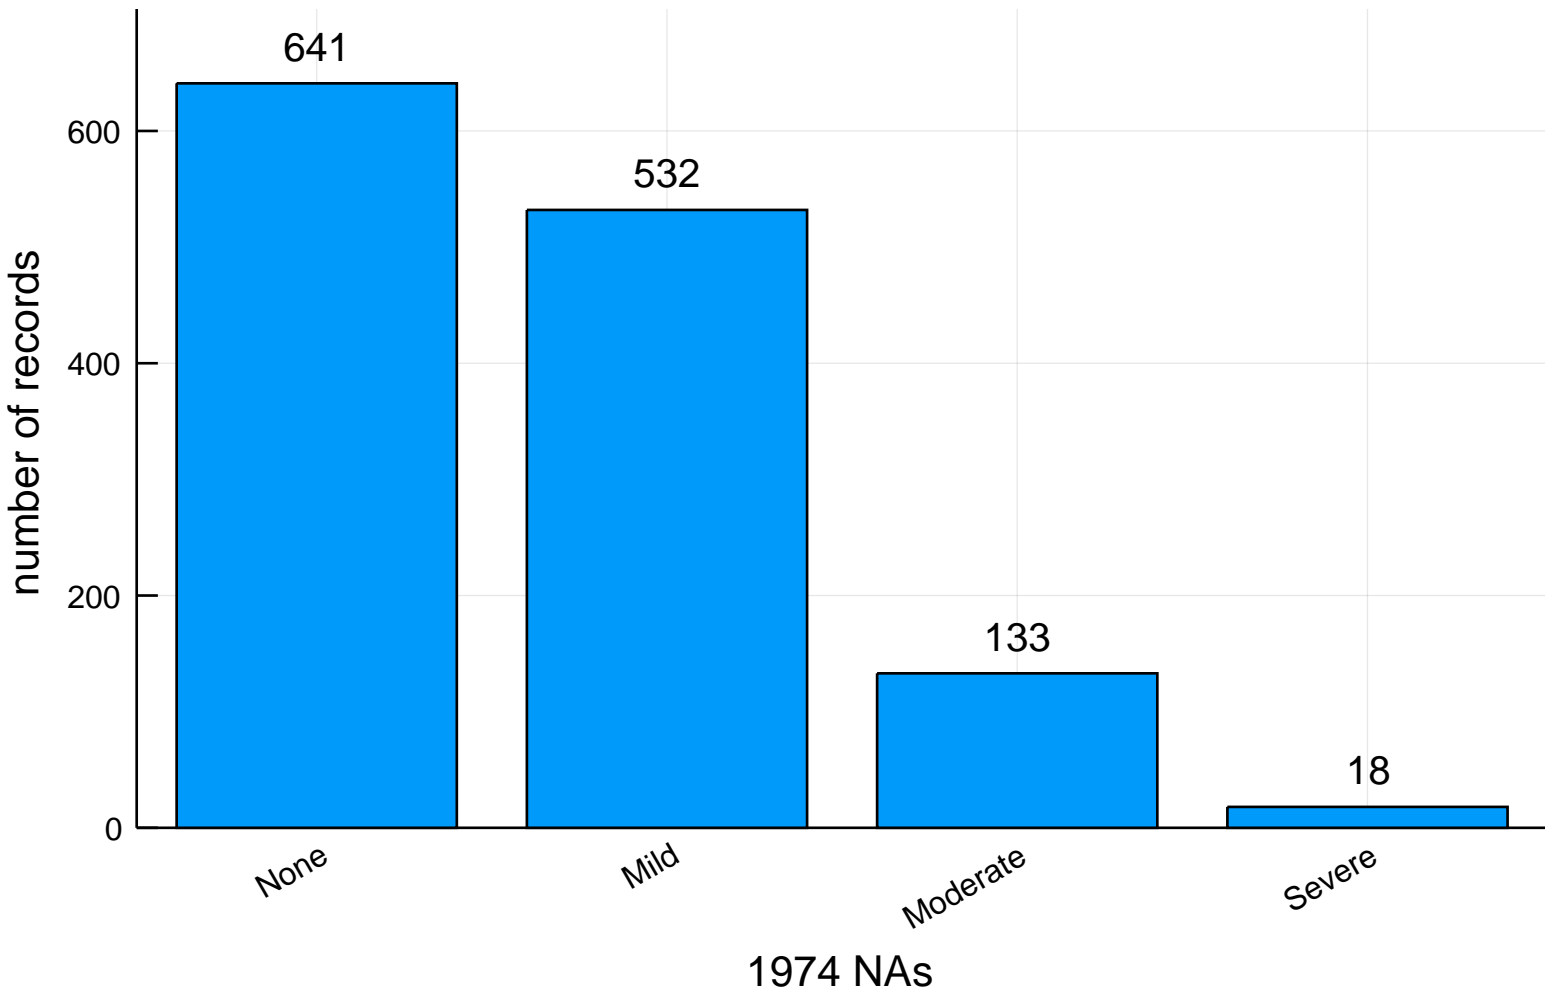

# Abscess (per site\_sub\_coll)

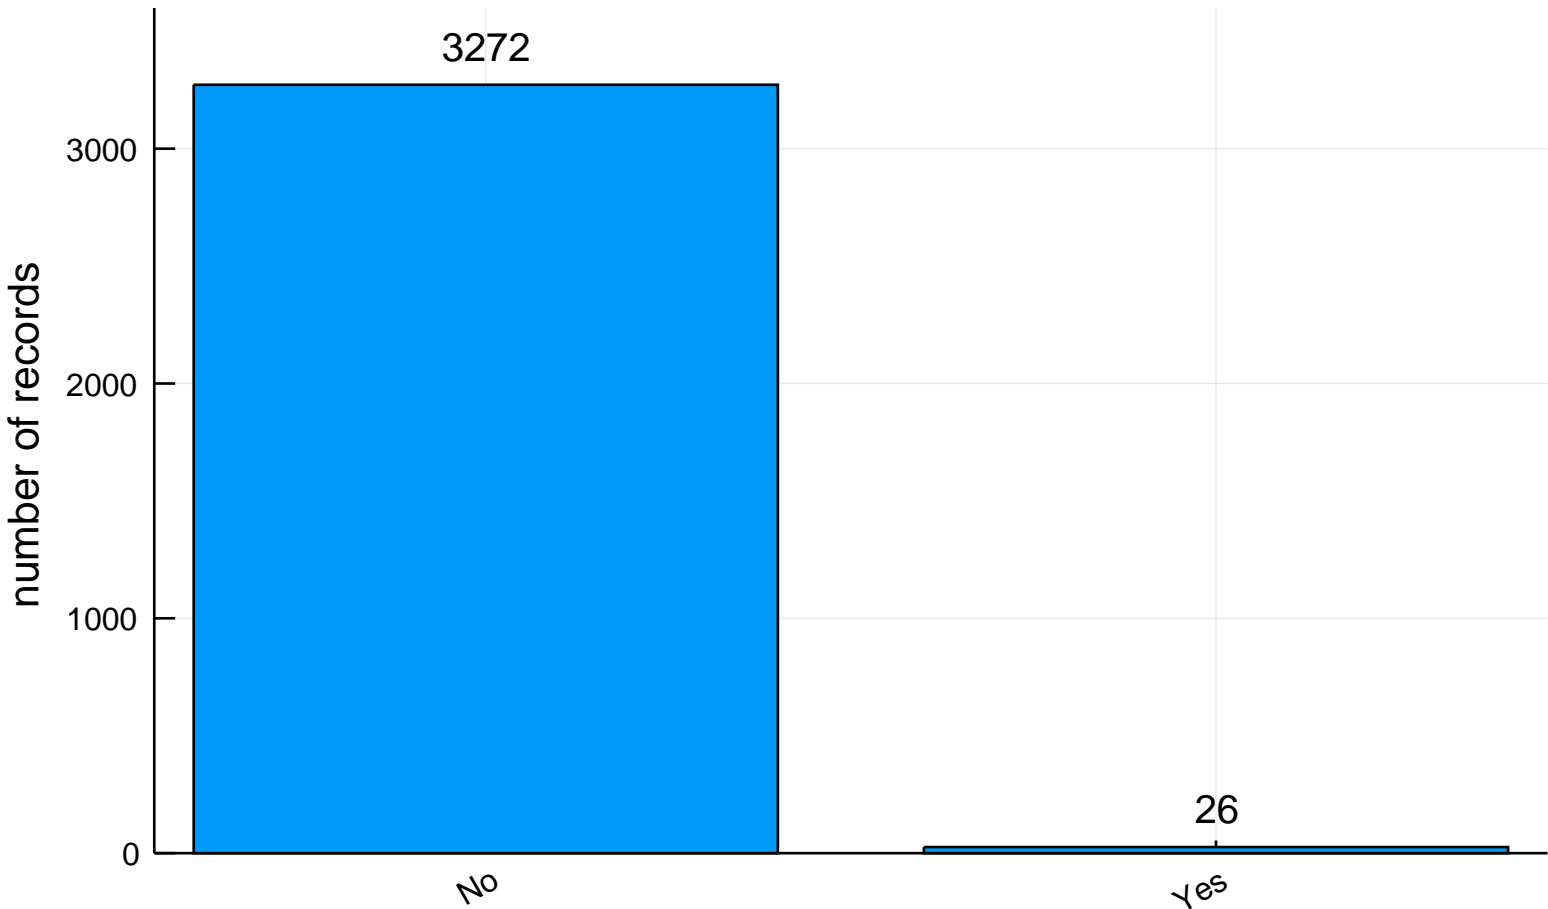

0 NAs

# Age at diagnosis (per Participant\_ID)

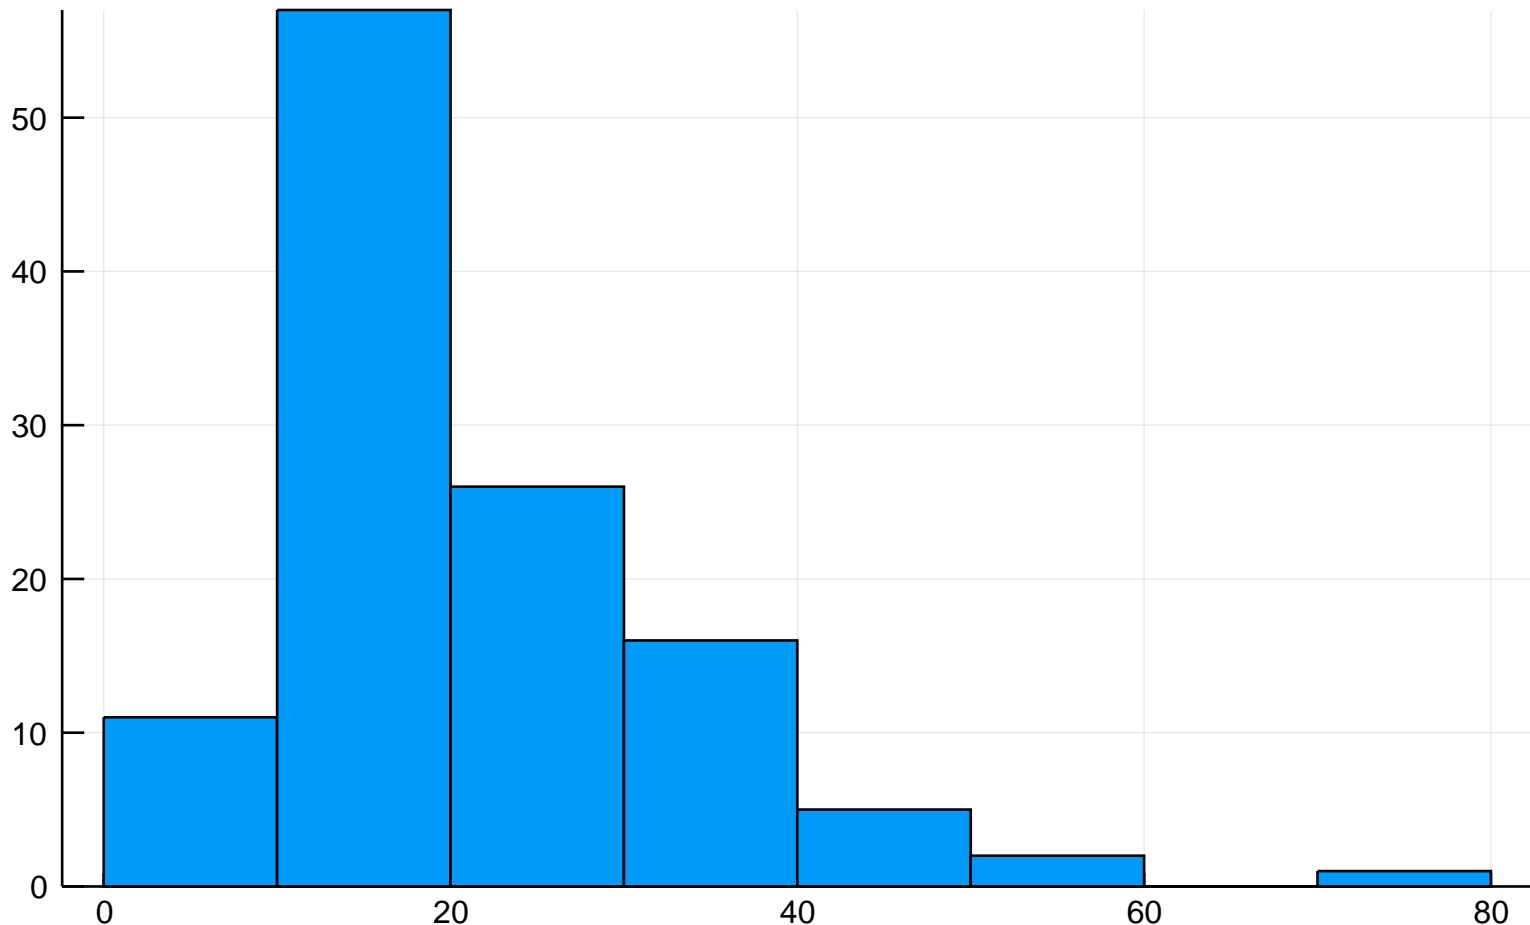

Mean: 20.91, stdev: 11.62

# Age at diagnosis A (per Participant\_ID)

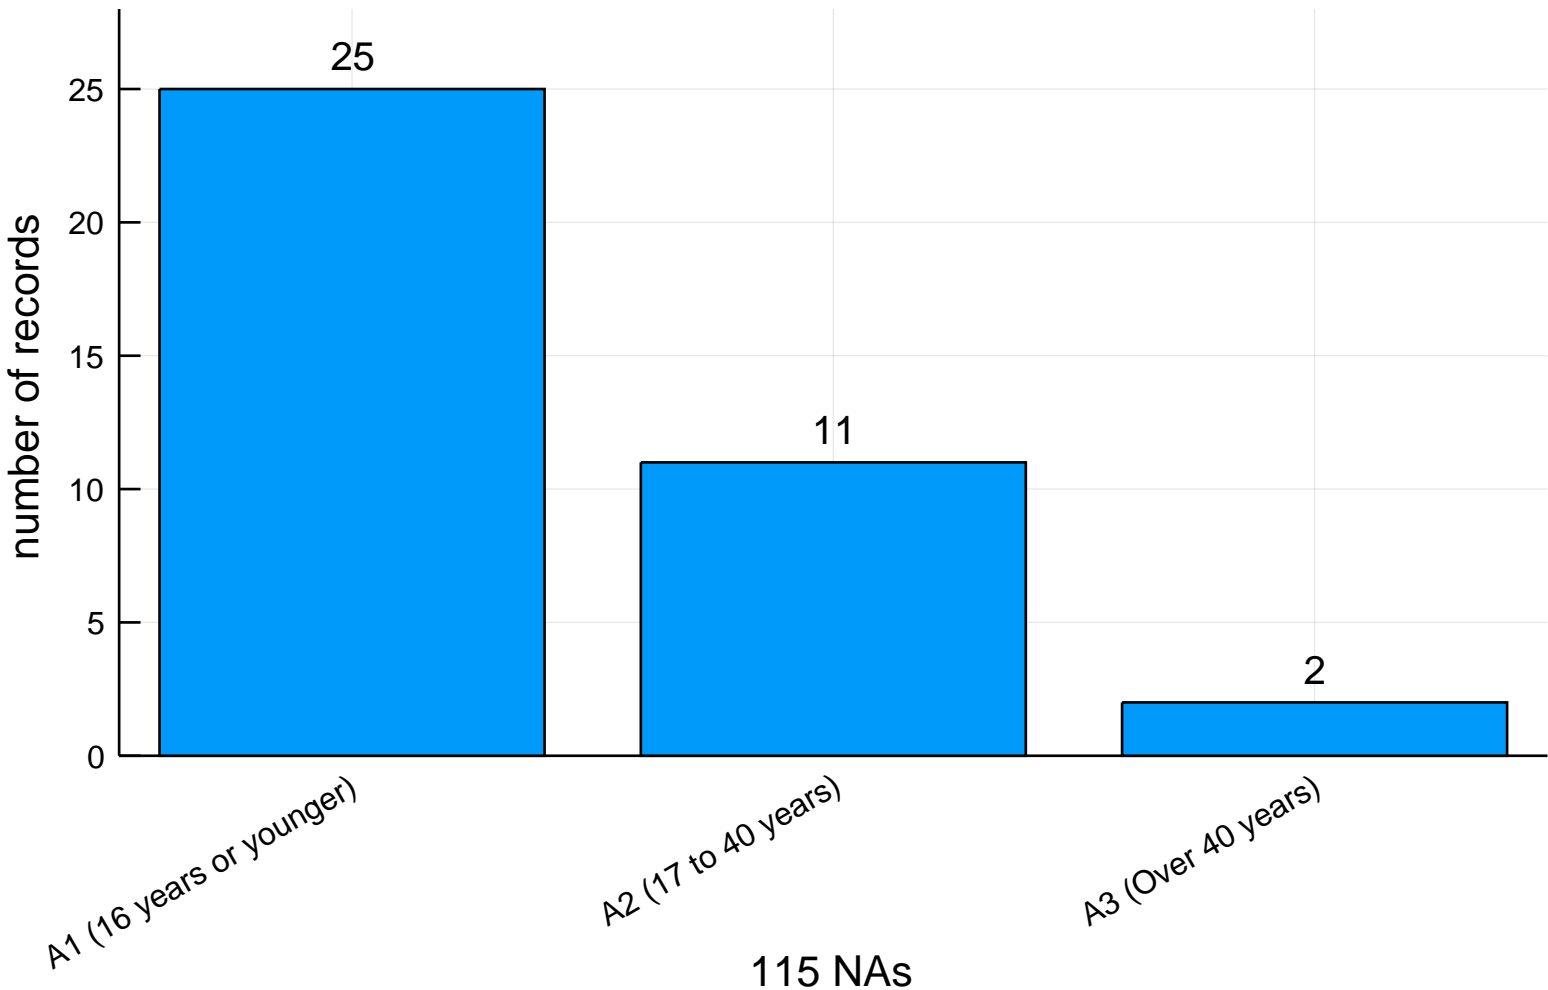

# Age when started smoking (per Participant\_ID)

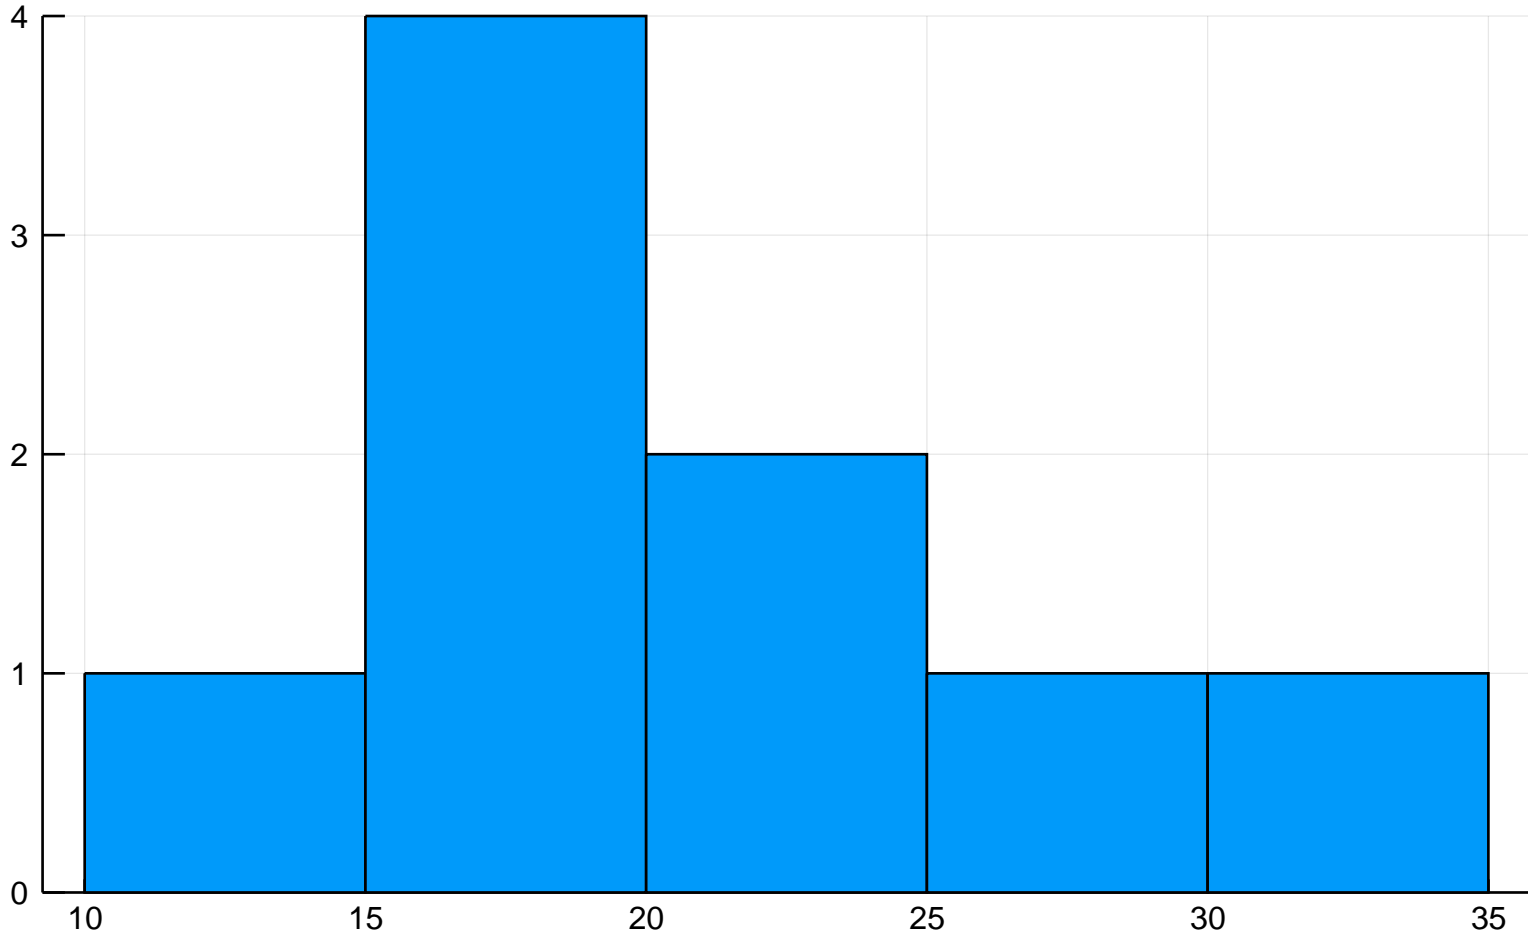

Mean: 19.11, stdev: 5.4

# Aggregated Lanes (per row)

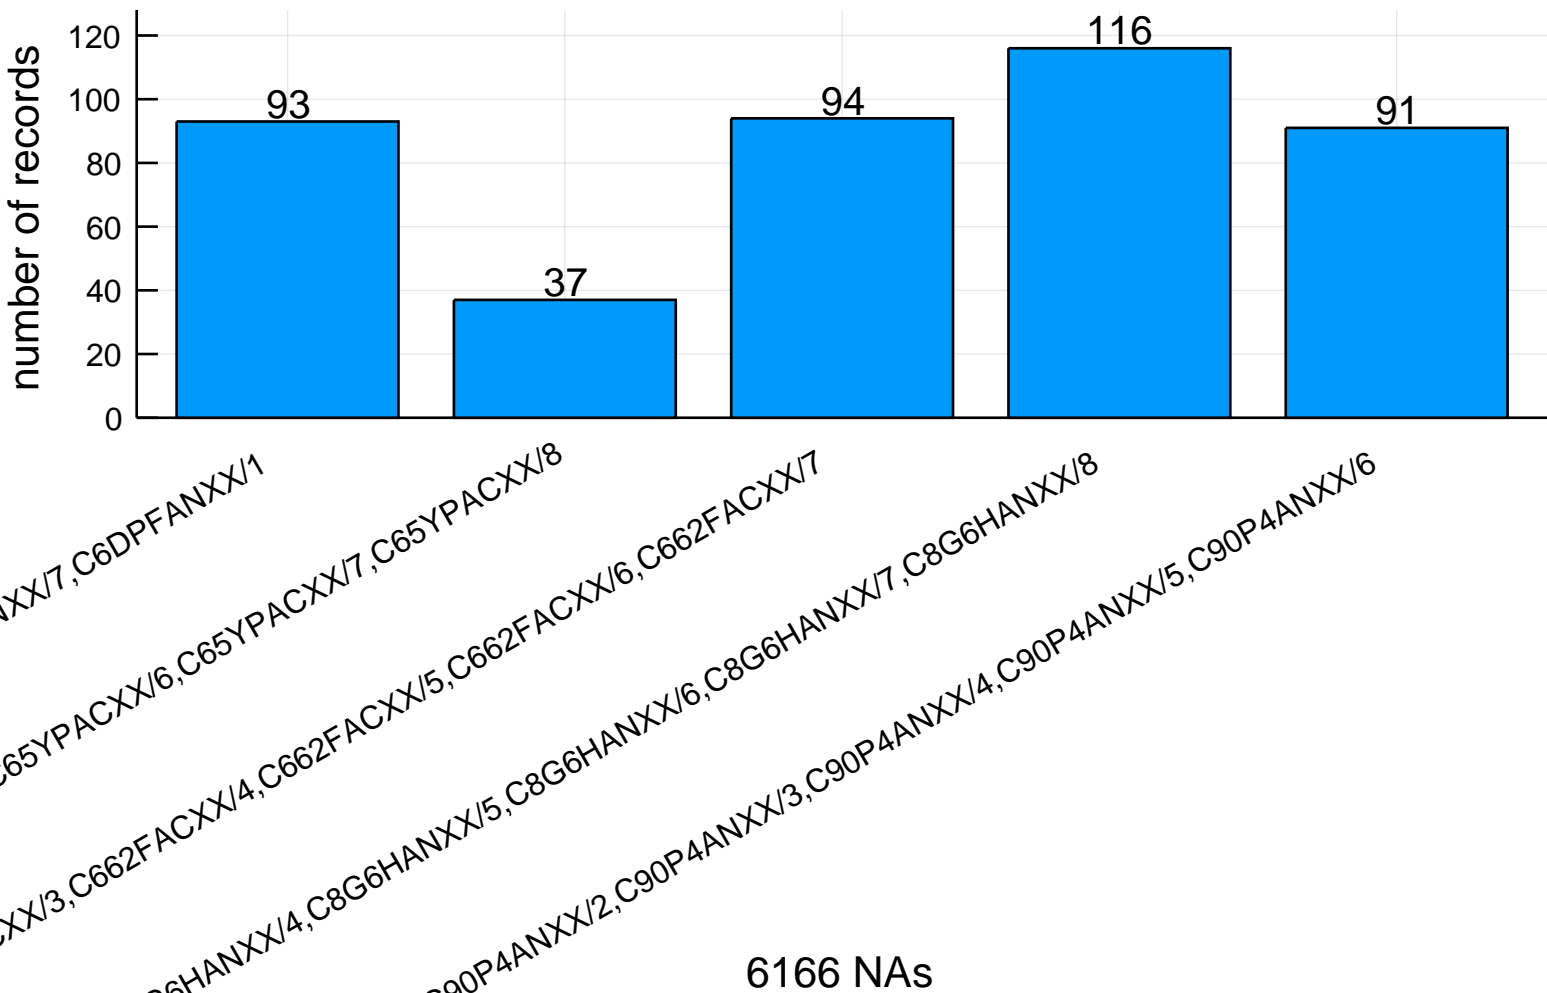

# Alcohol based mouthwash (per Participant\_ID)

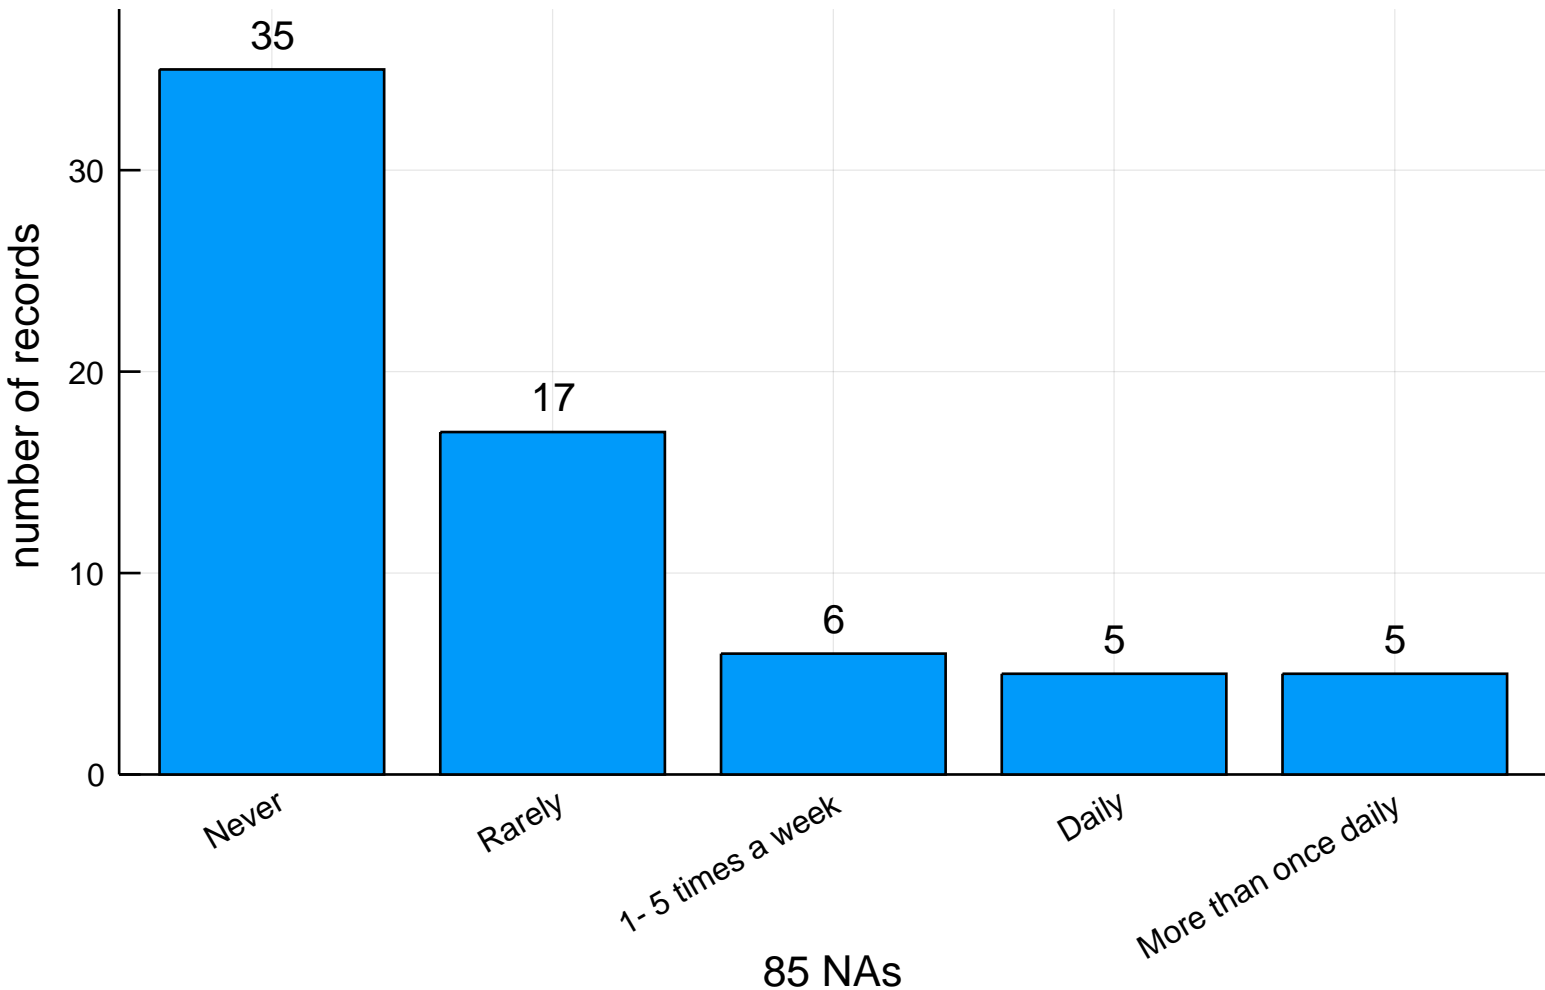



# Alcohol beer brandy spirits hard liquor (per row)

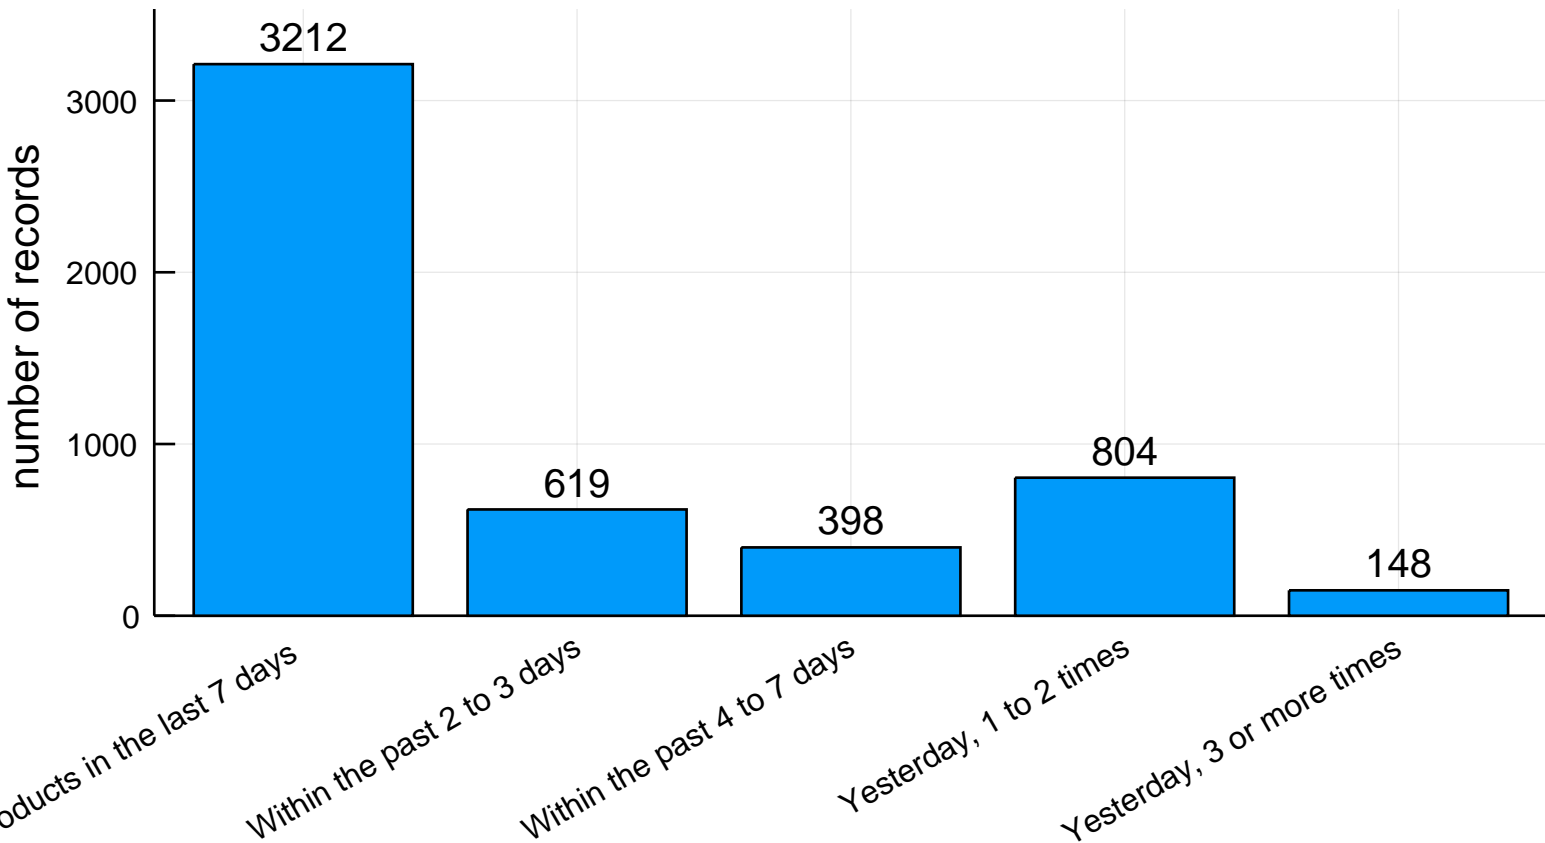

1416 NAs

# Alopecia areata (per site\_sub\_coll)

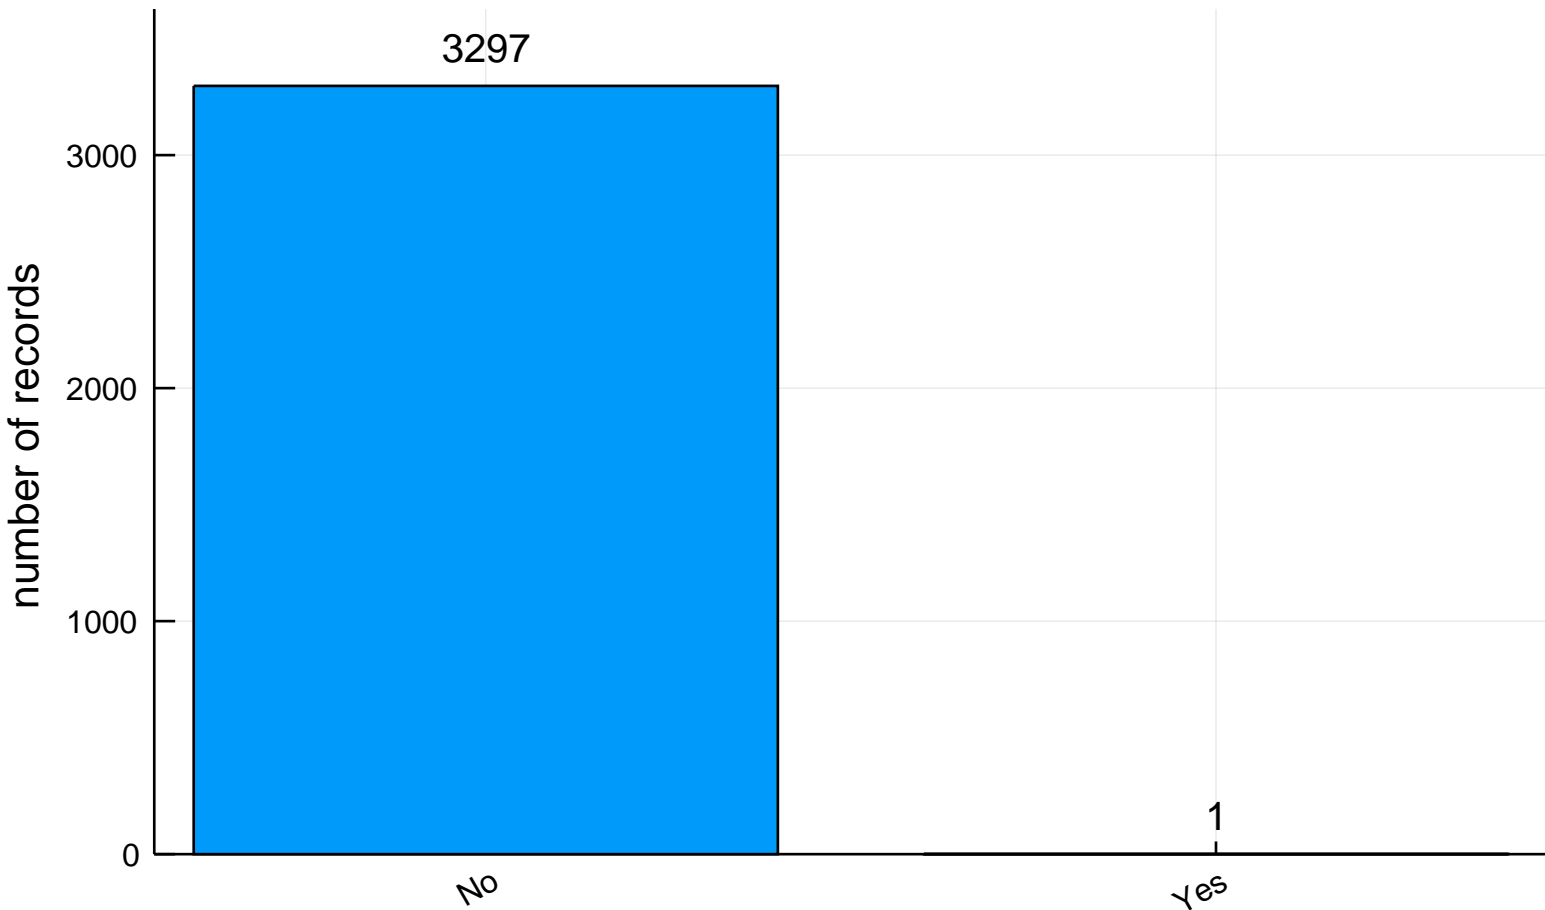

0 NAs

# Anal fissure (per site\_sub\_coll)

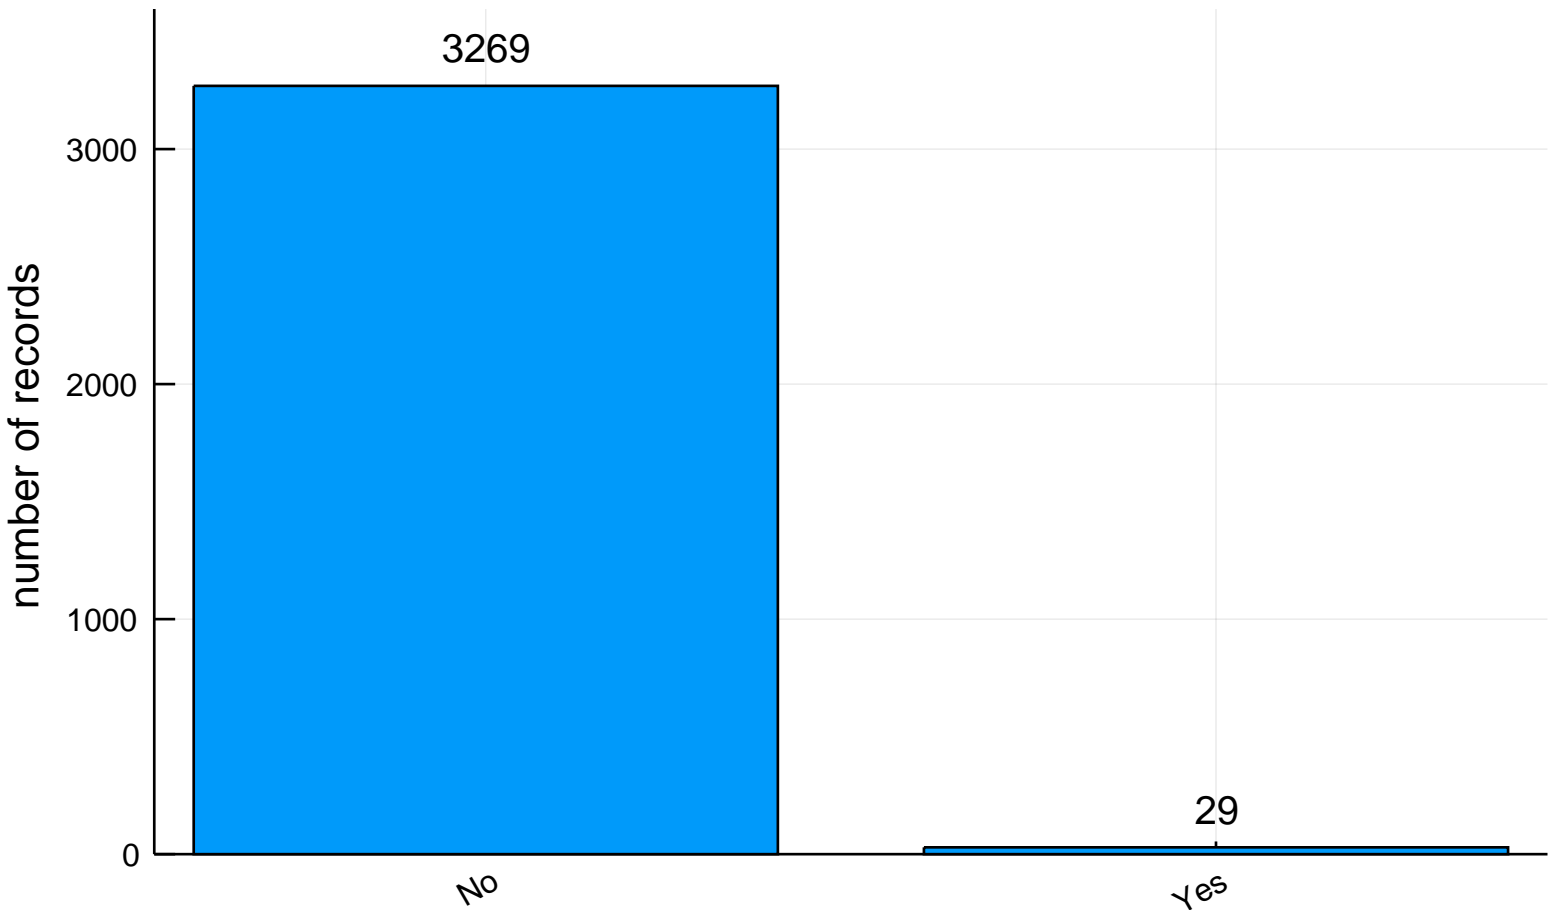

0 NAs

# Ankylosing spondylitis (per site\_sub\_coll)

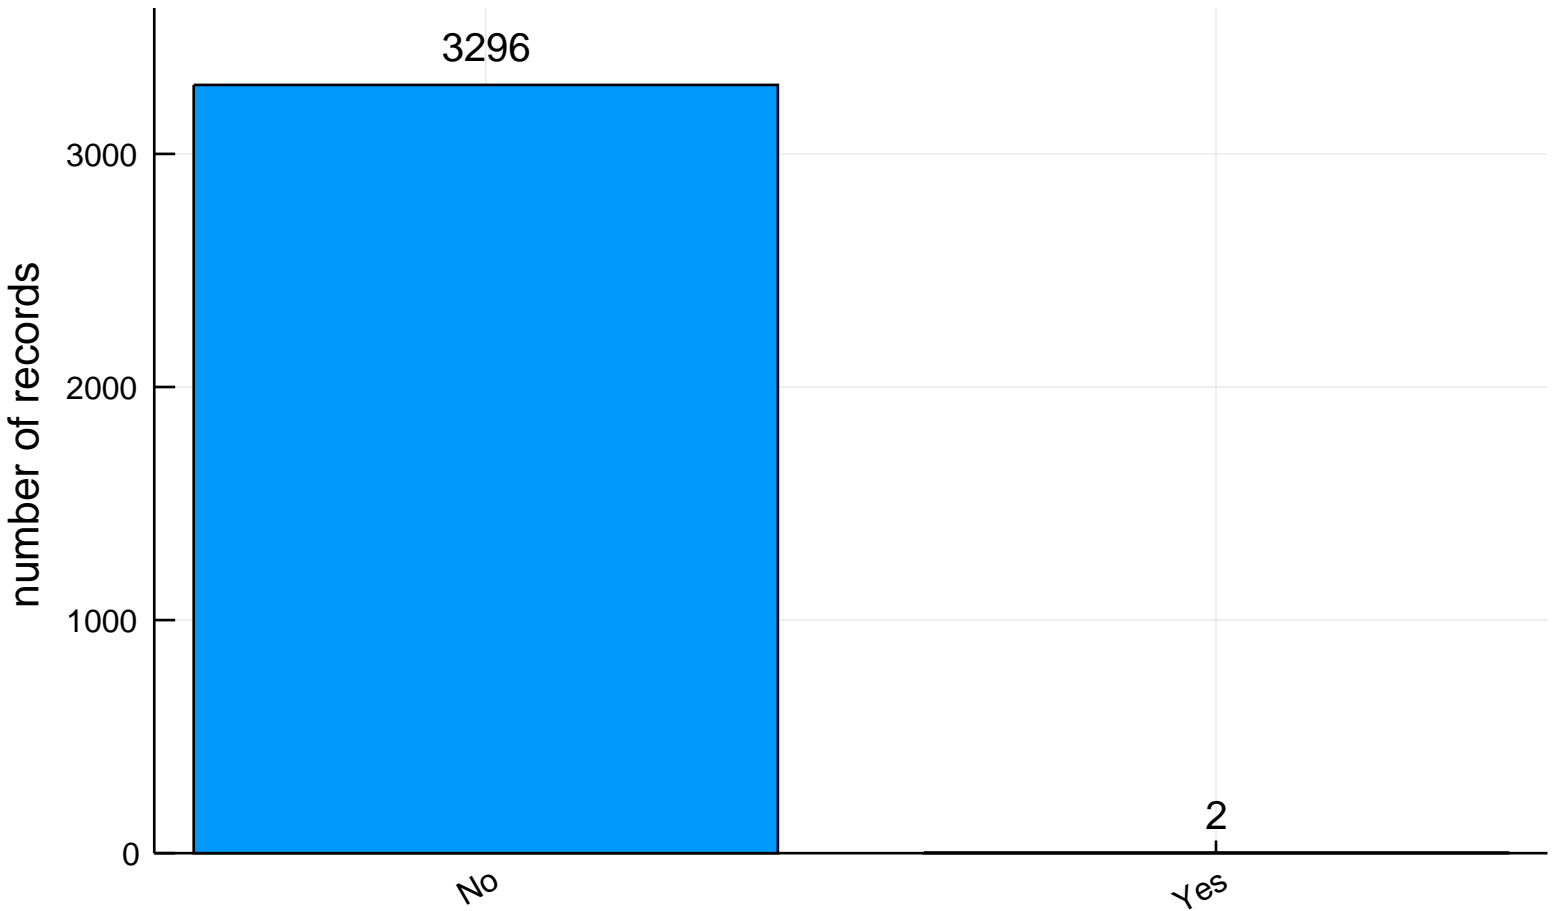

0 NAs

# Antibiotics (per row)

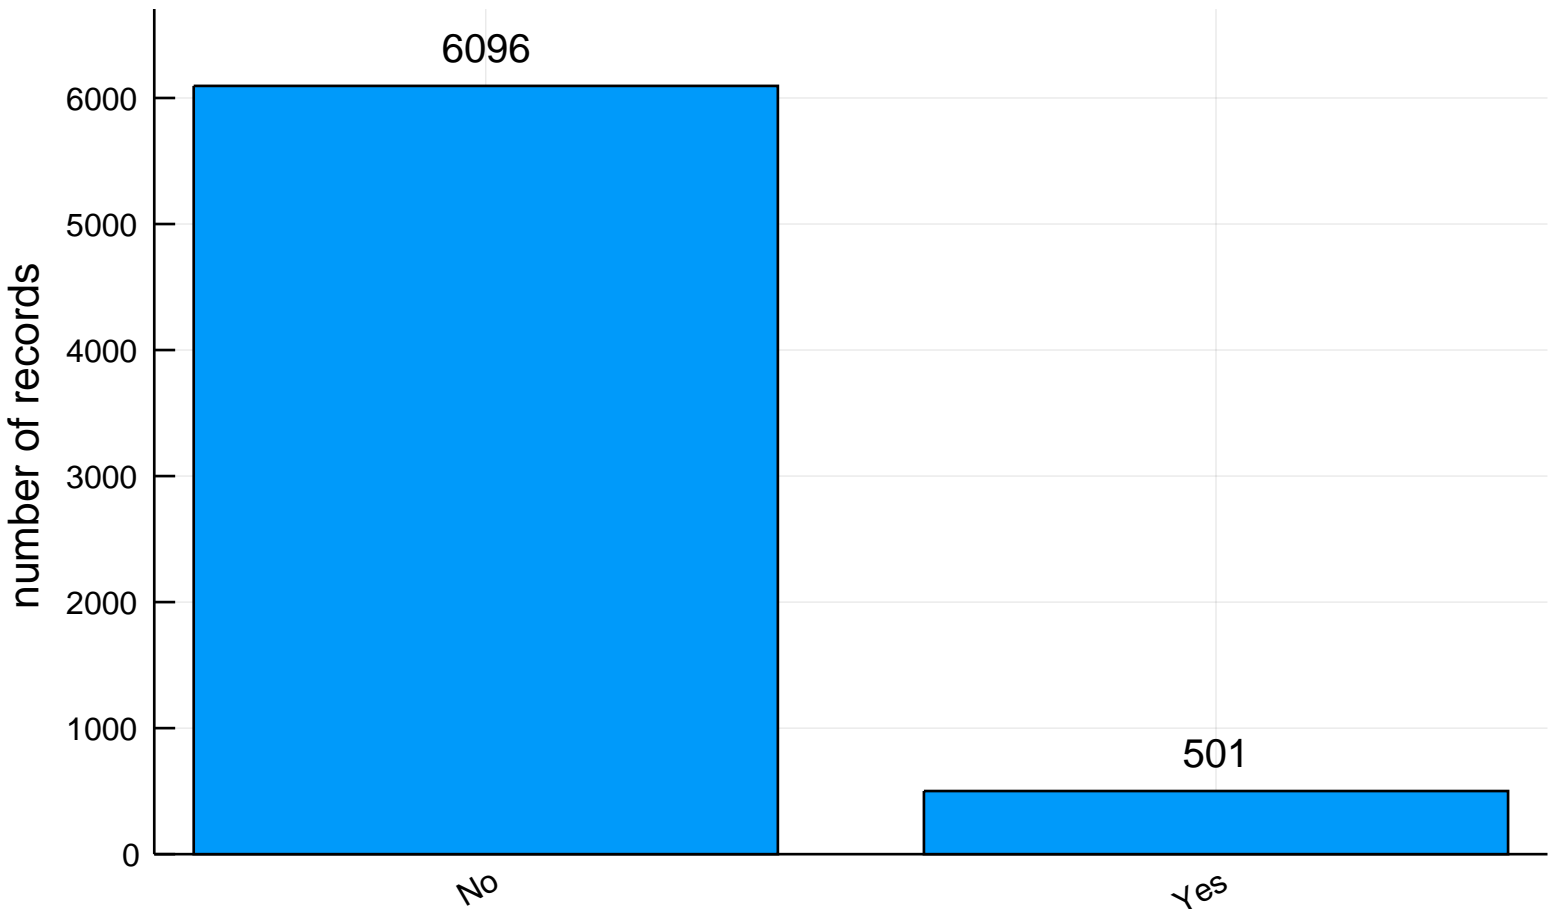

0 NAs

# Aphthous ulcers (per site\_sub\_coll)

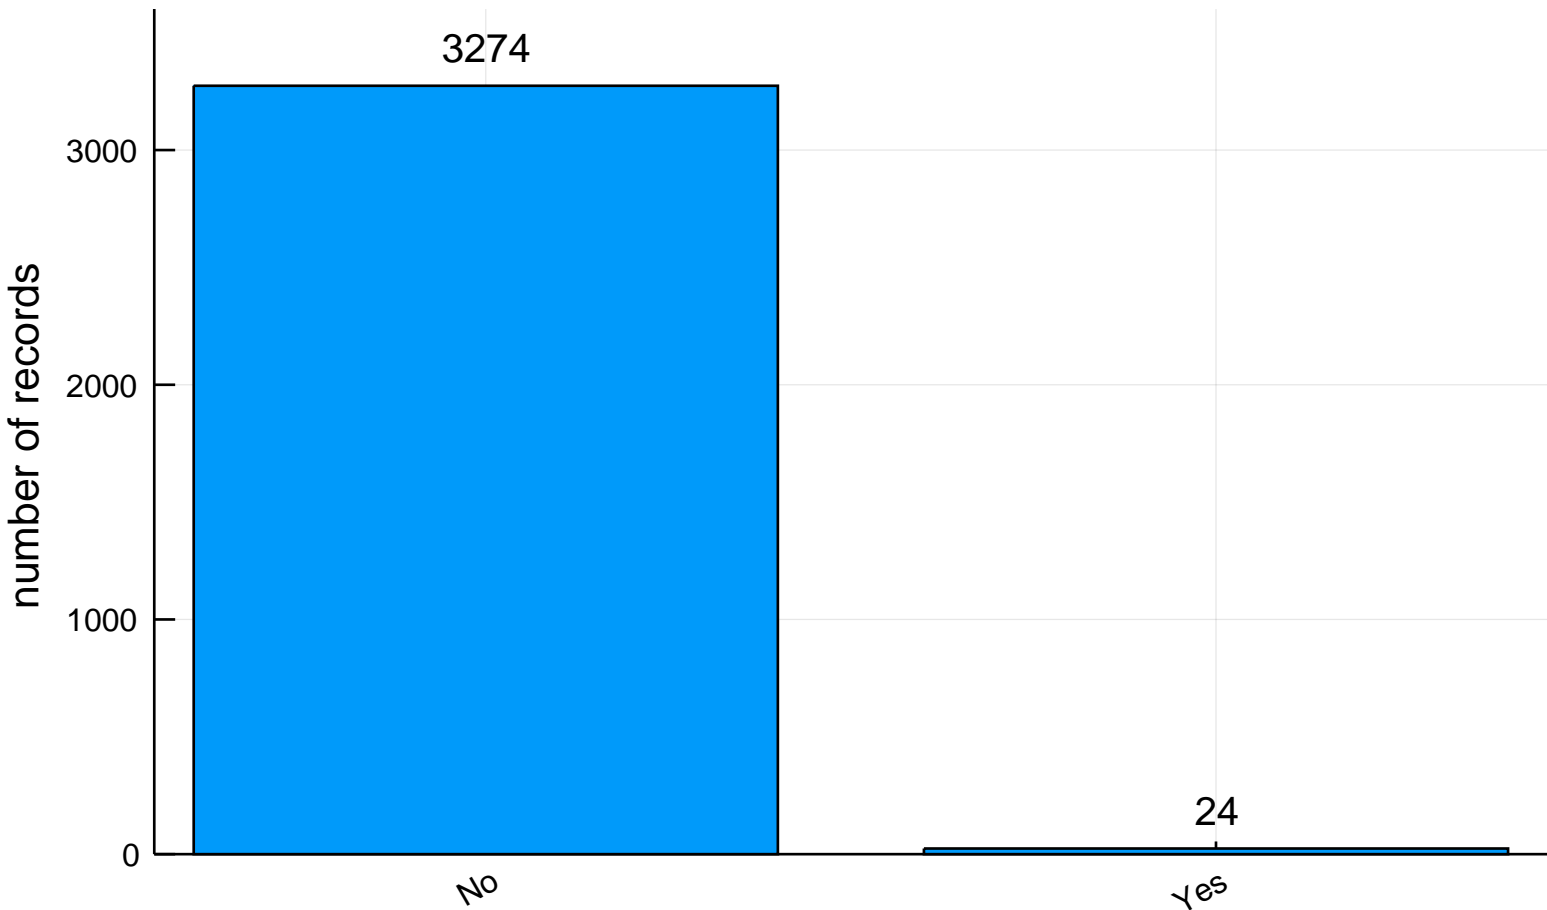

0 NAs

# Arthralgia (per site\_sub\_coll)

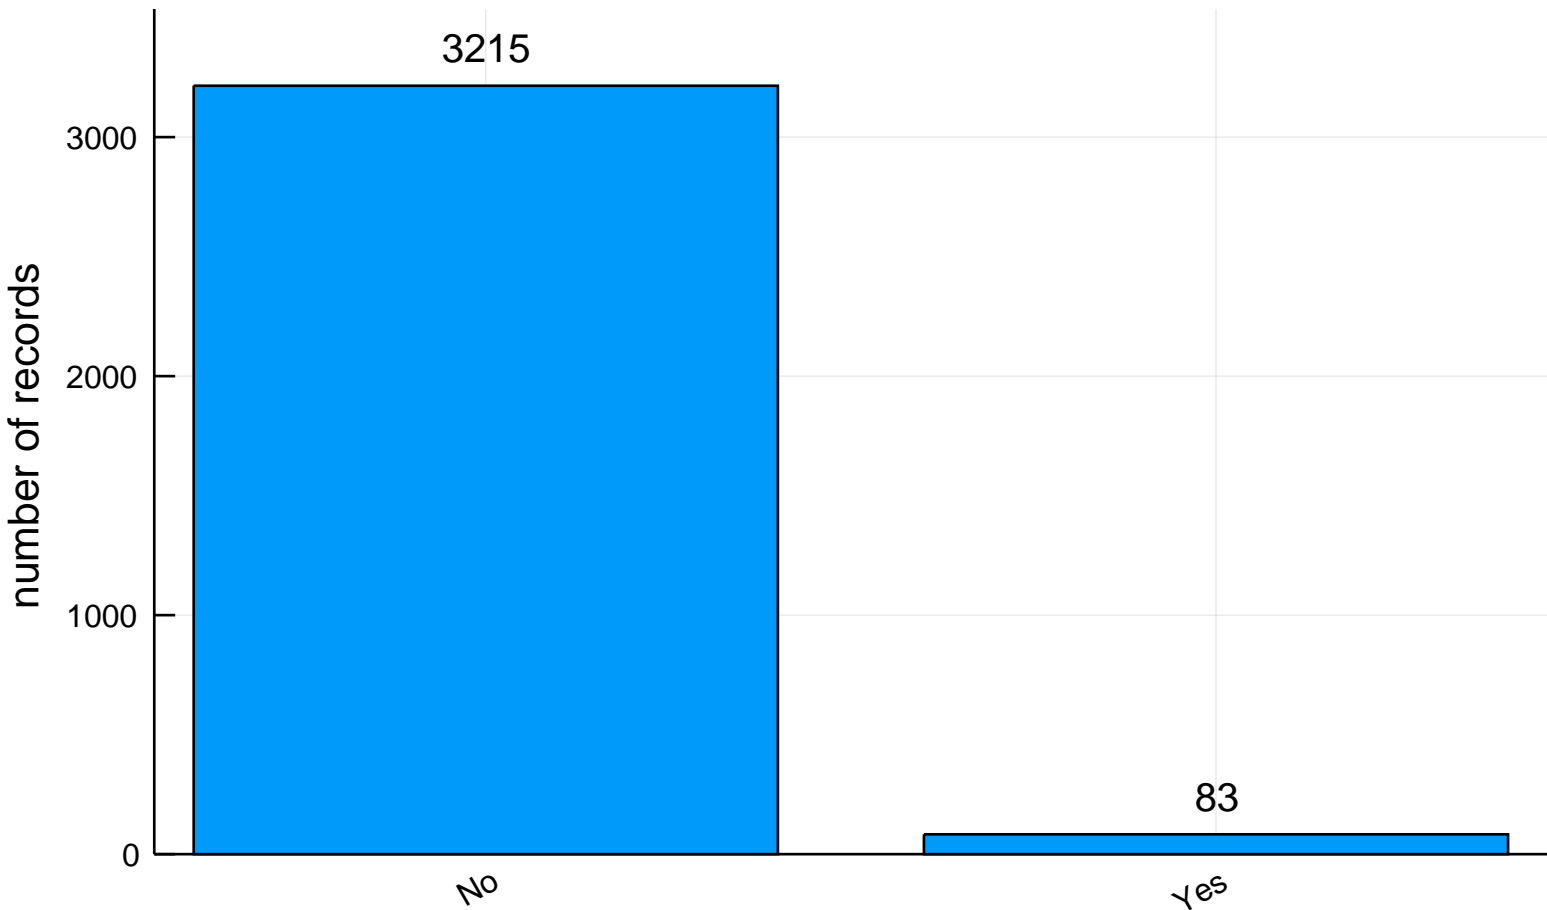

0 NAs

# Arthralgias (per site\_sub\_coll)

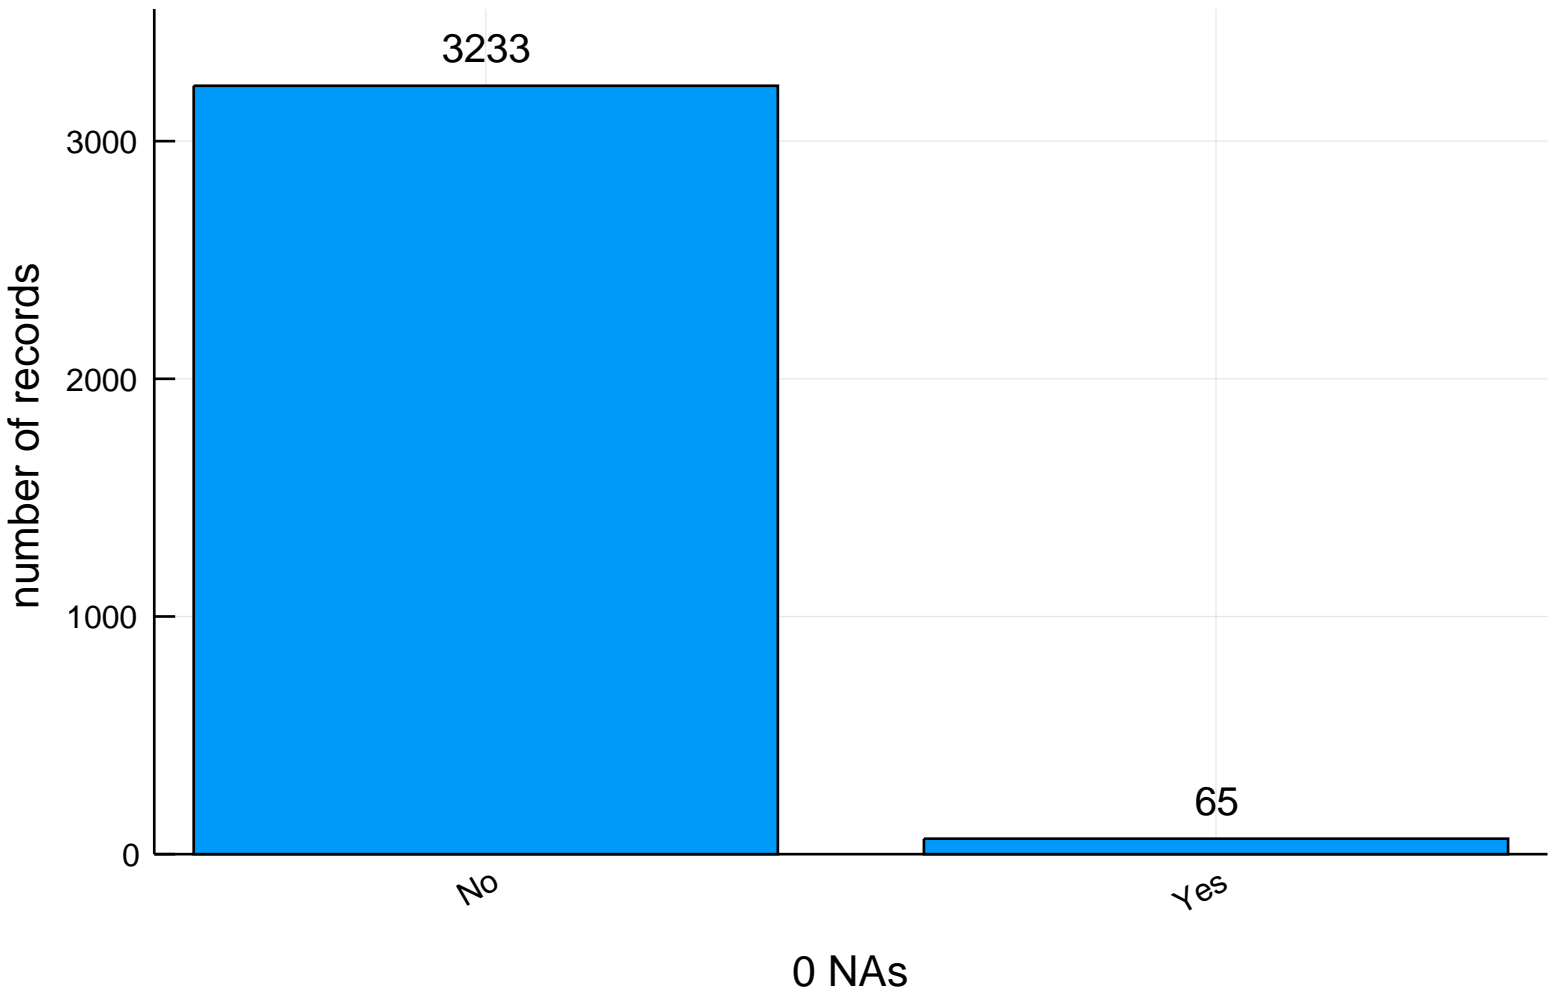



# Arthritis uncertain diagnosis (per site\_sub\_coll)

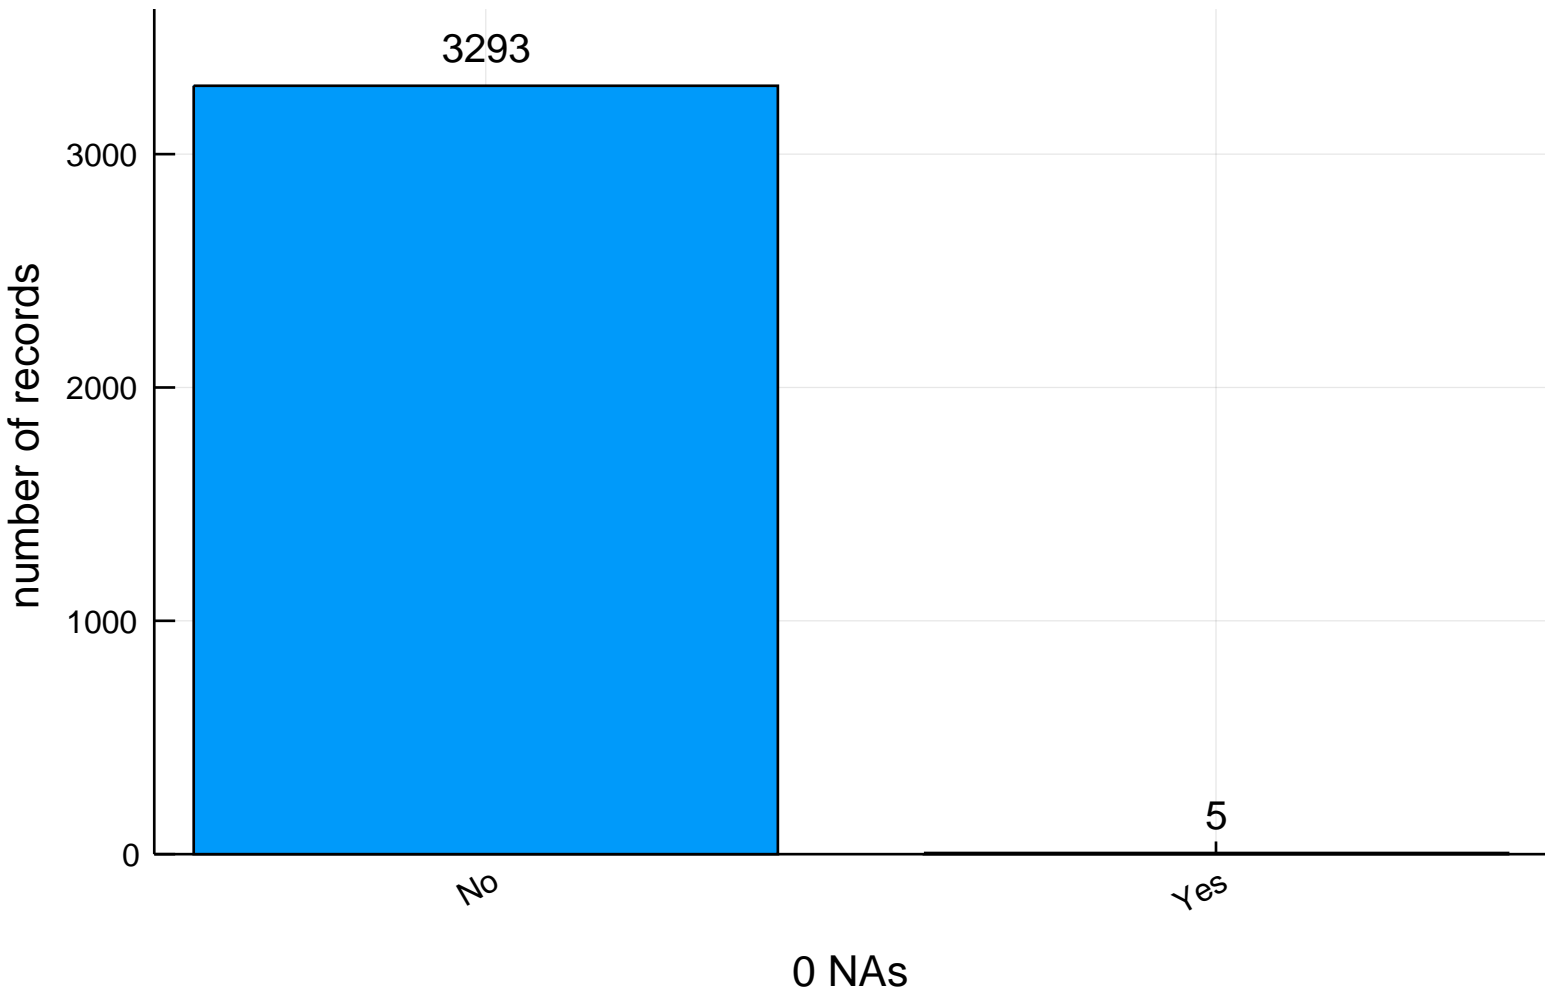

# Asacol mesalamine (per site\_sub\_coll)

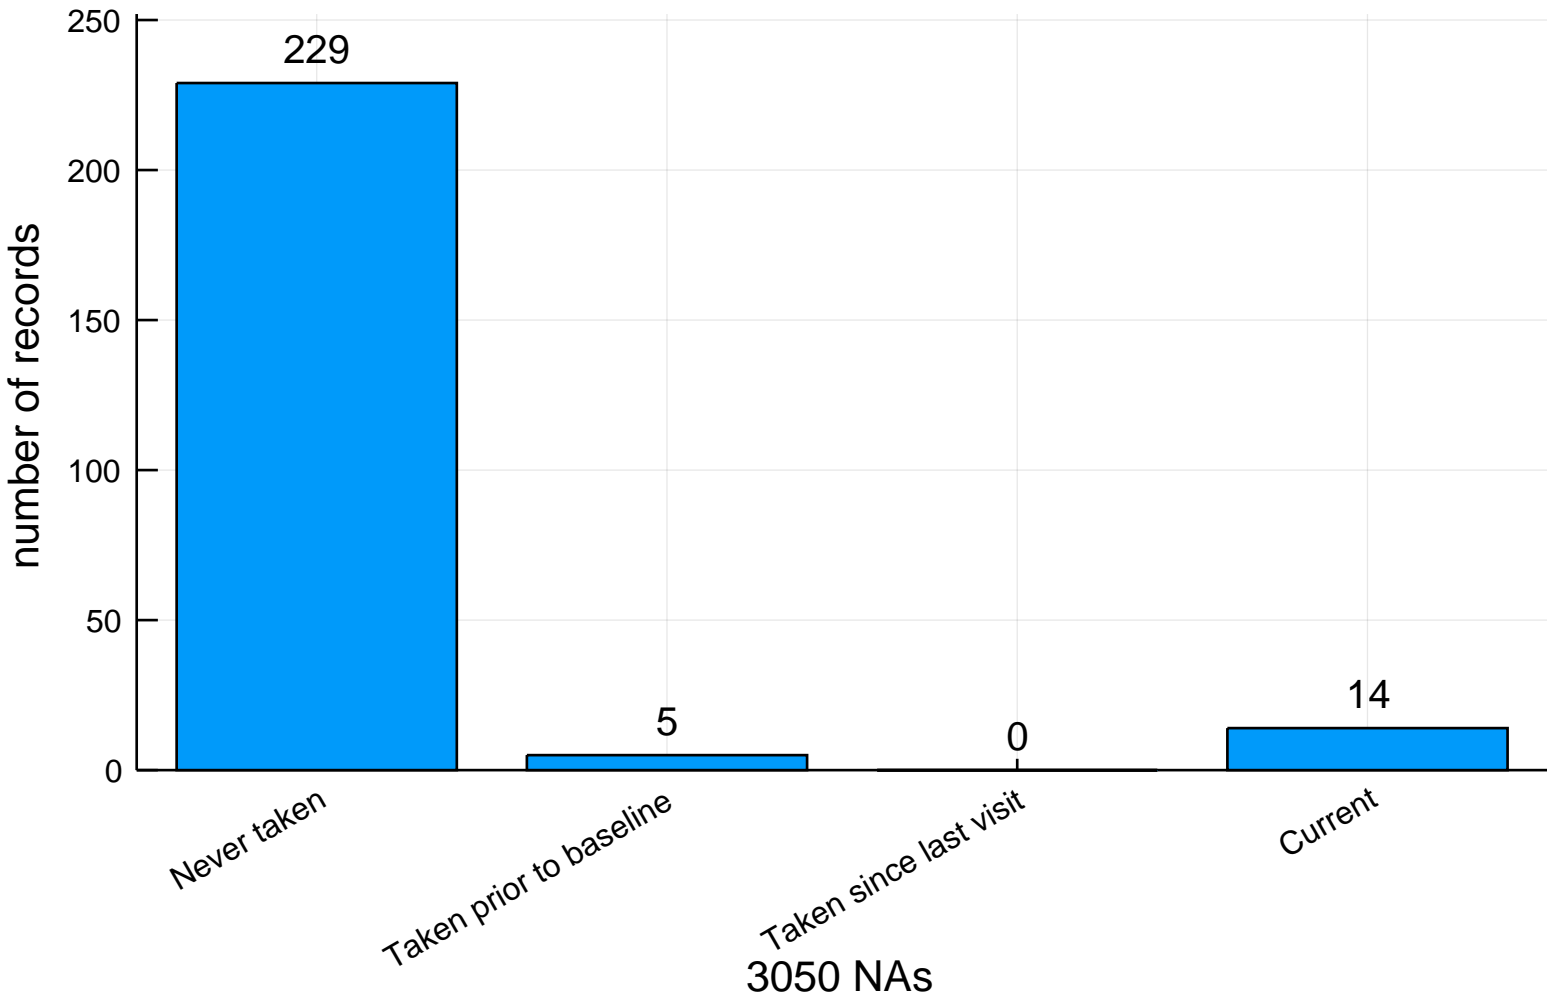

# Asthma (per site\_sub\_coll)

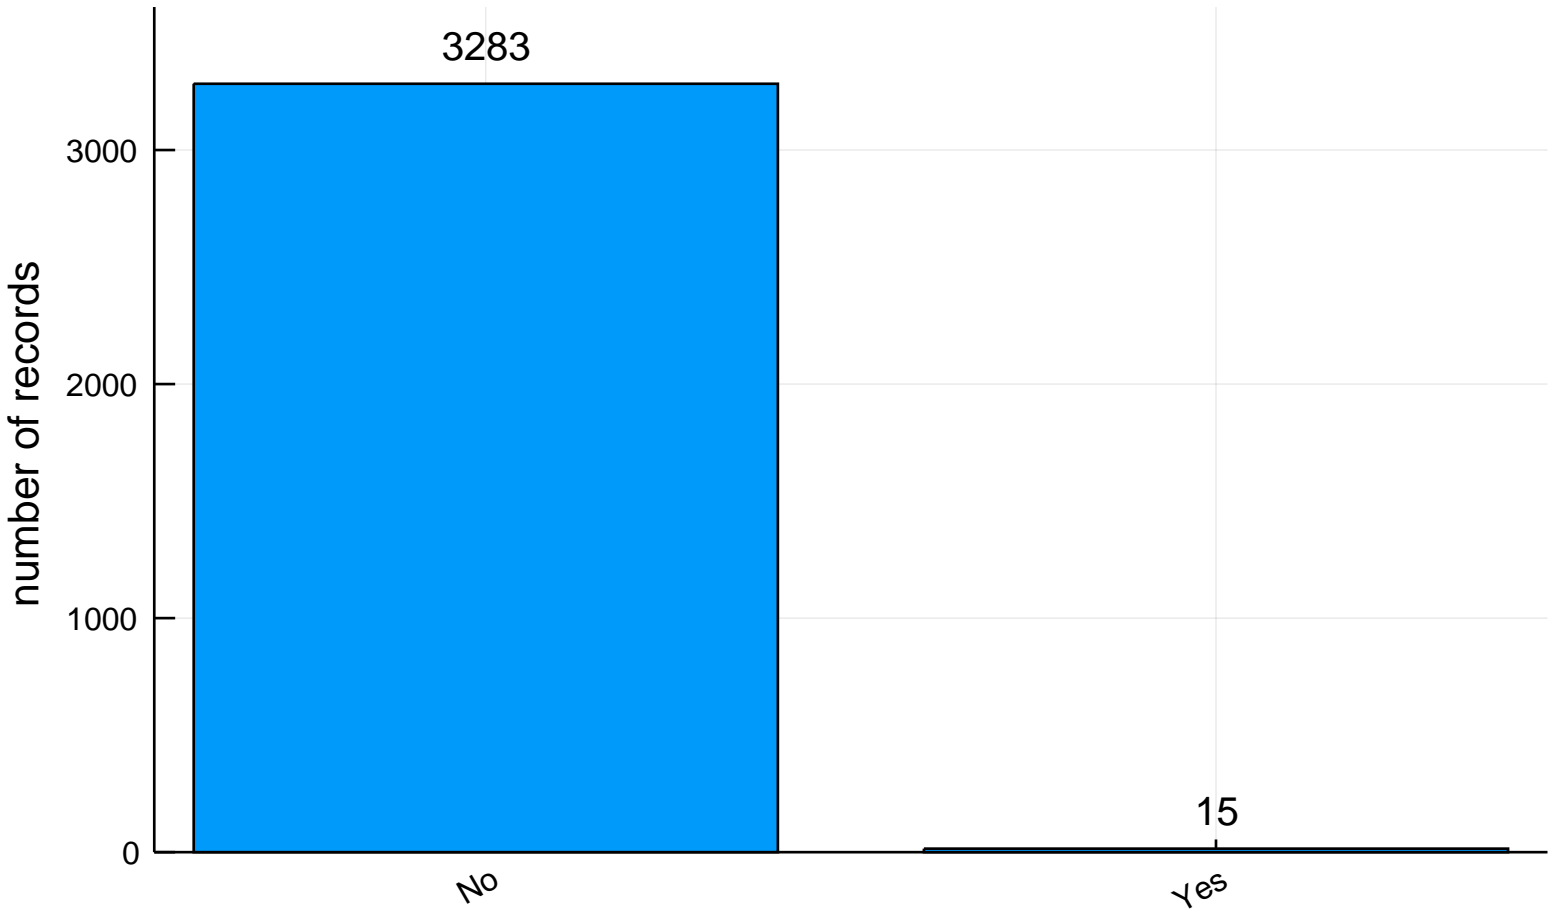

0 NAs

# Azathioprine Imuran Azasan (per site\_sub\_coll)

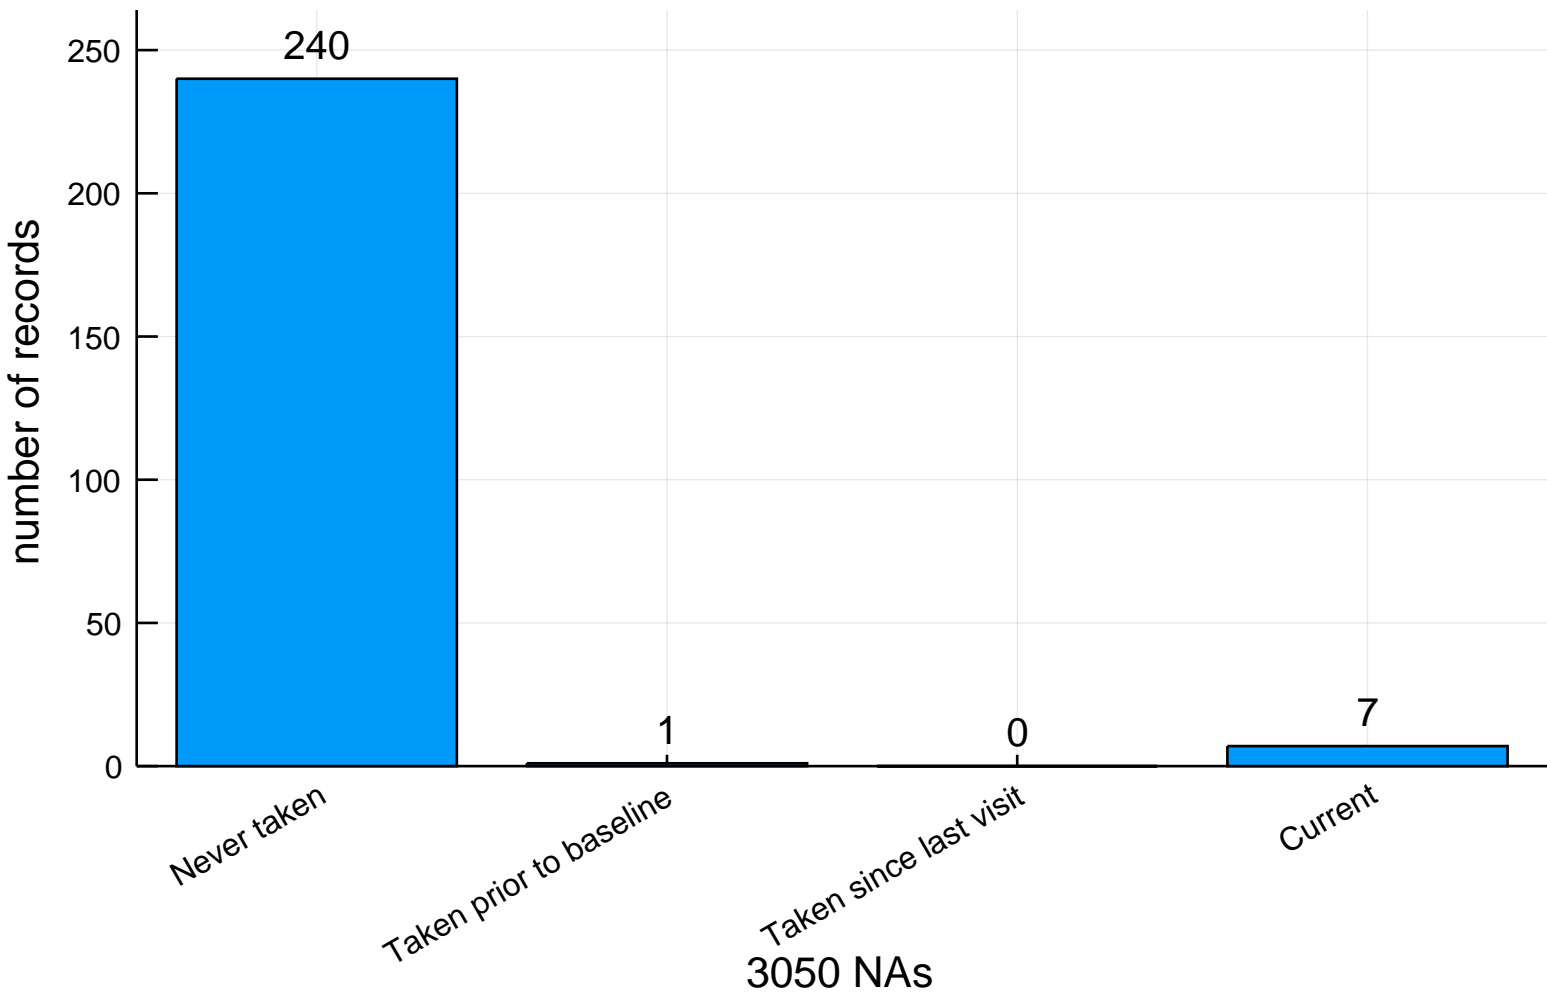

# baseline montreal location (per Participant\_ID)

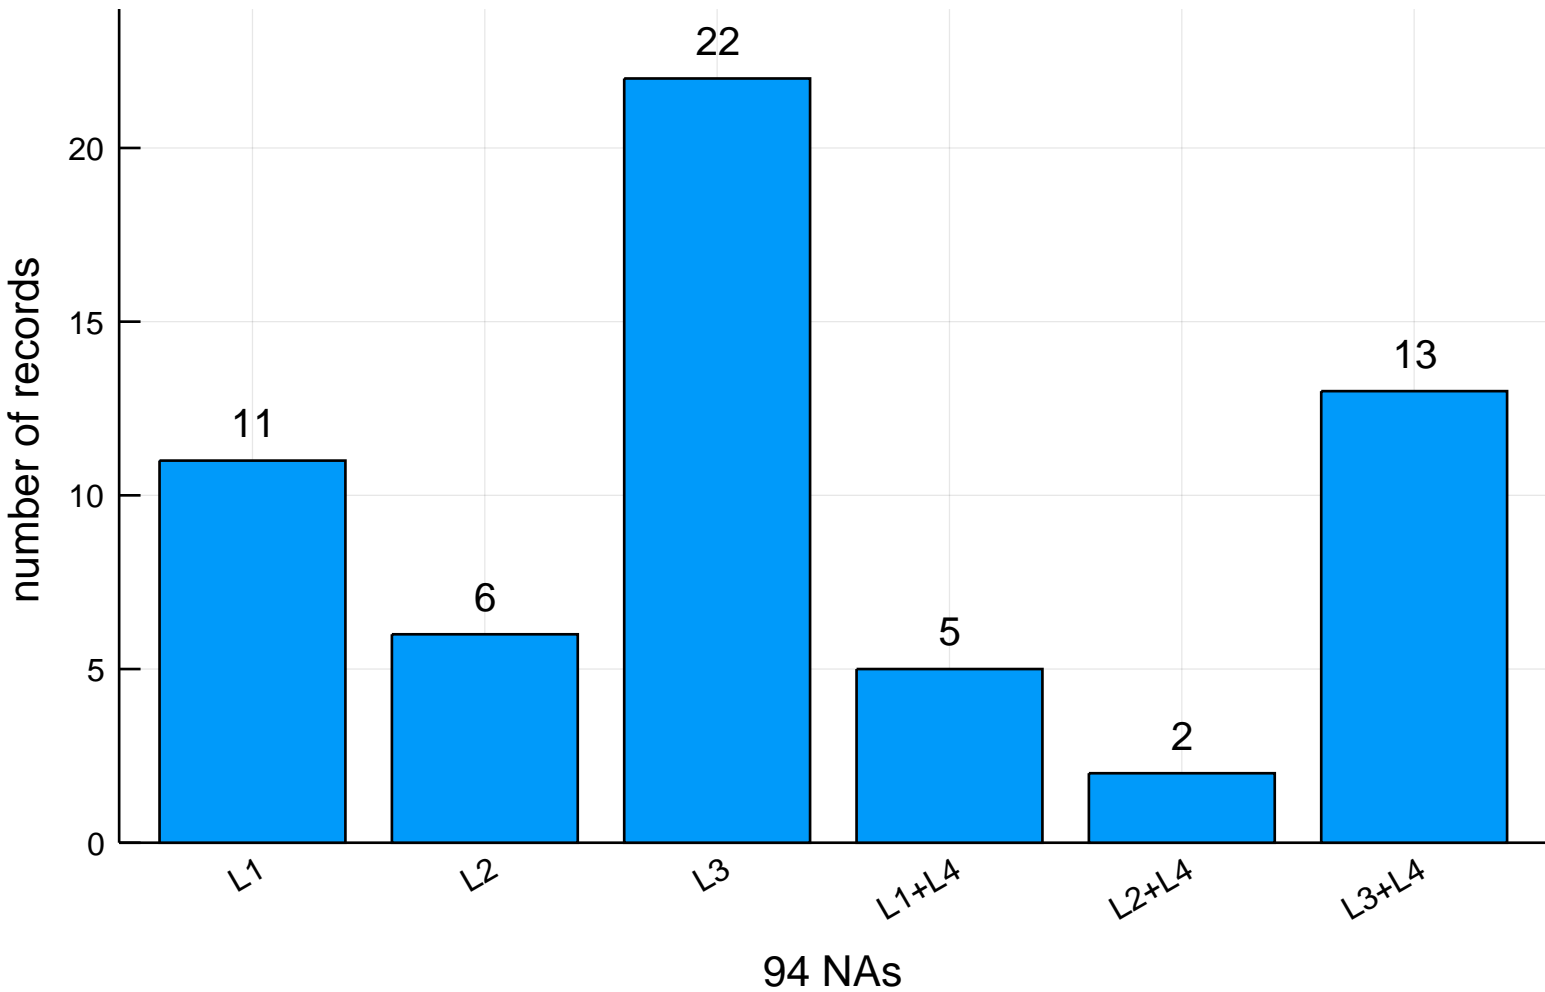

# Beans tofu soy soy burgers lentils Mexic (per site\_sub\_coll)

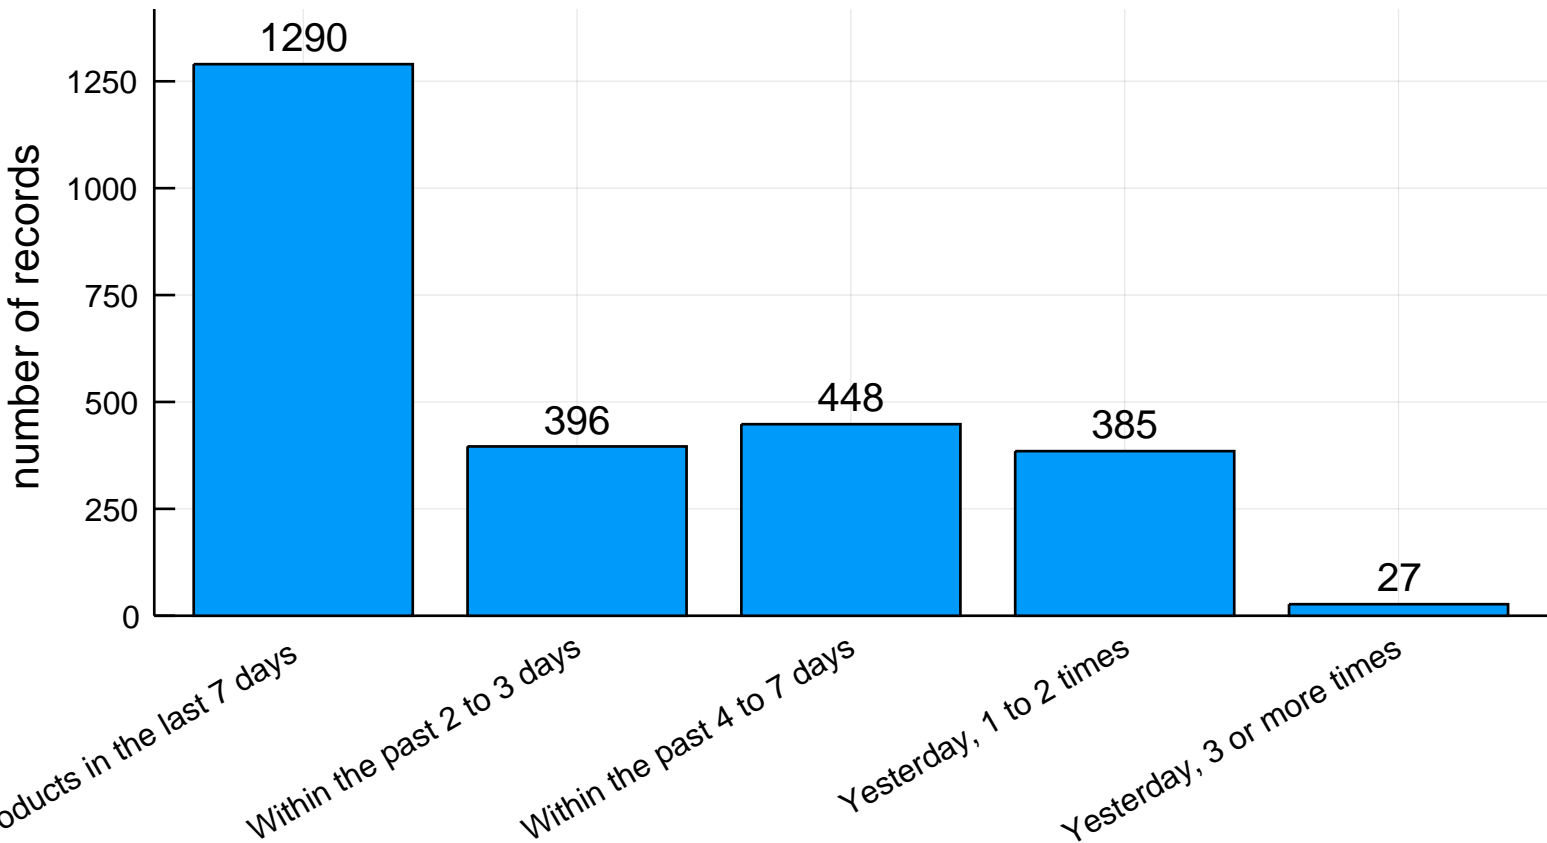

752 NAs

# Behavior B 1 (per Participant\_ID)

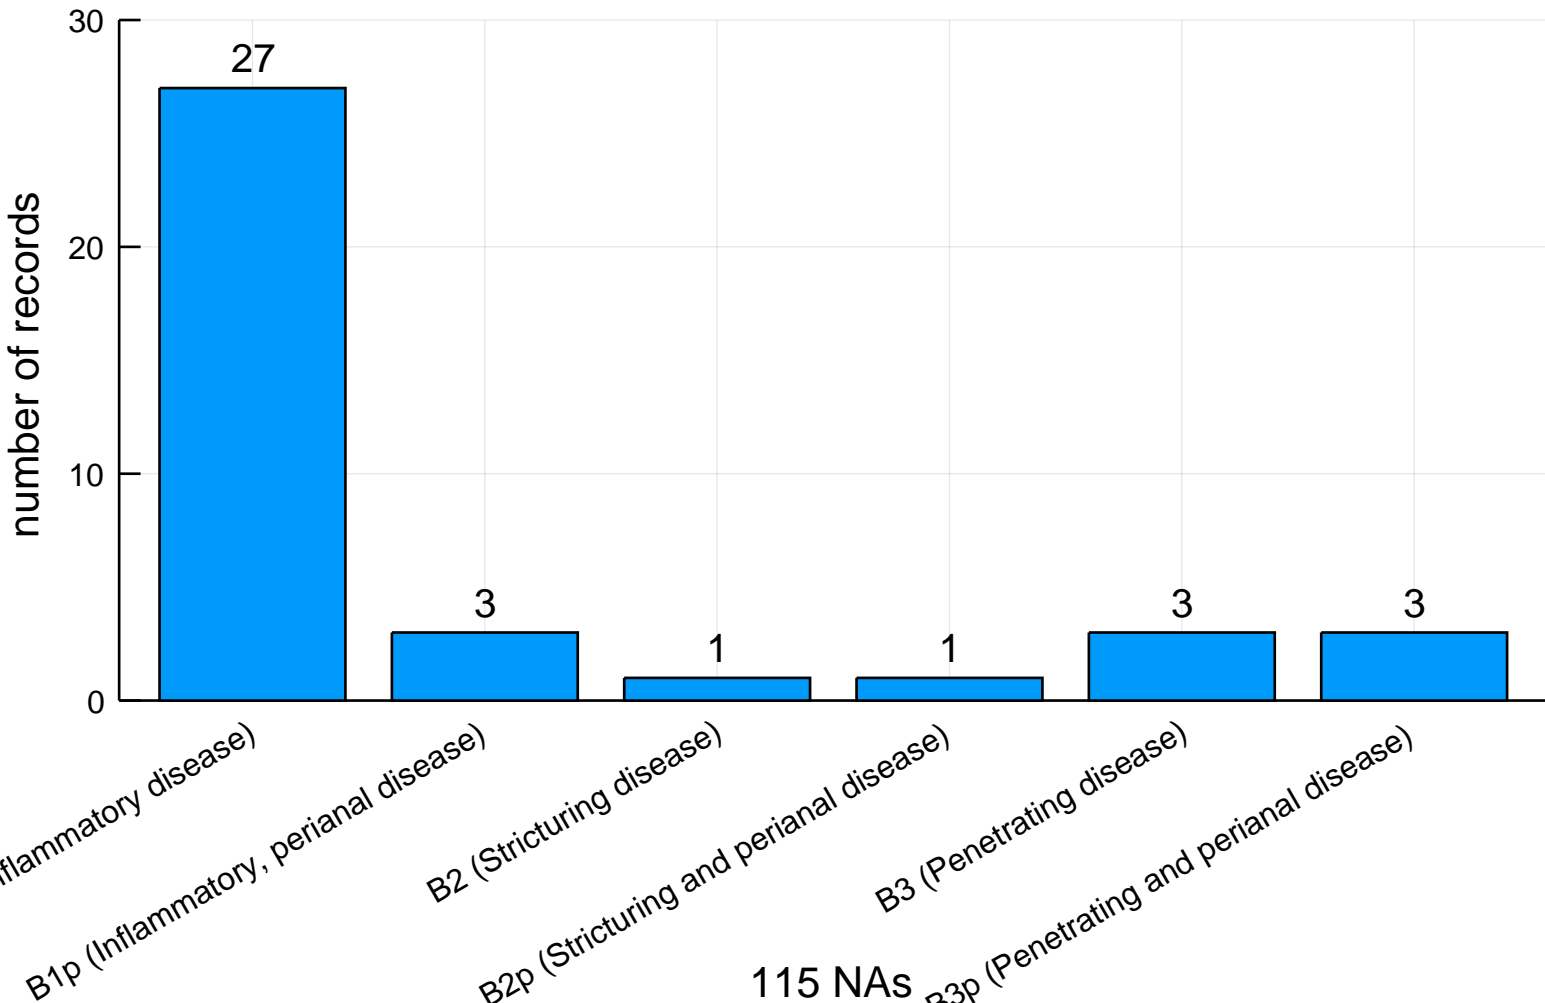

# biopsy location (per row)

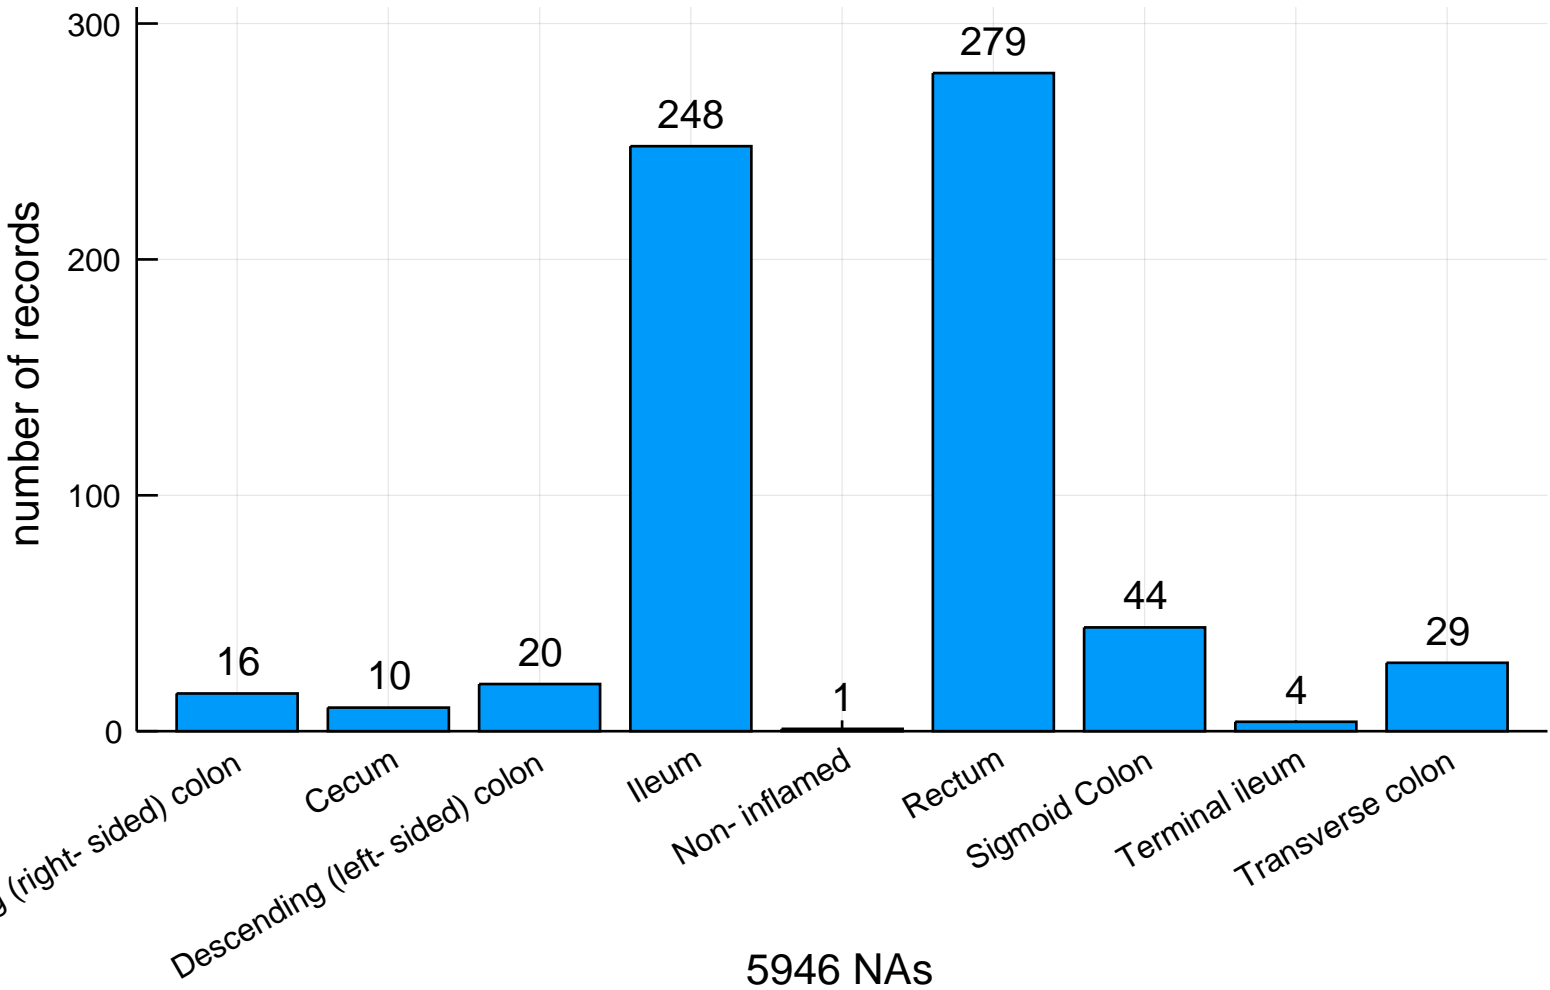



# Blood in the stool (per site\_sub\_coll)

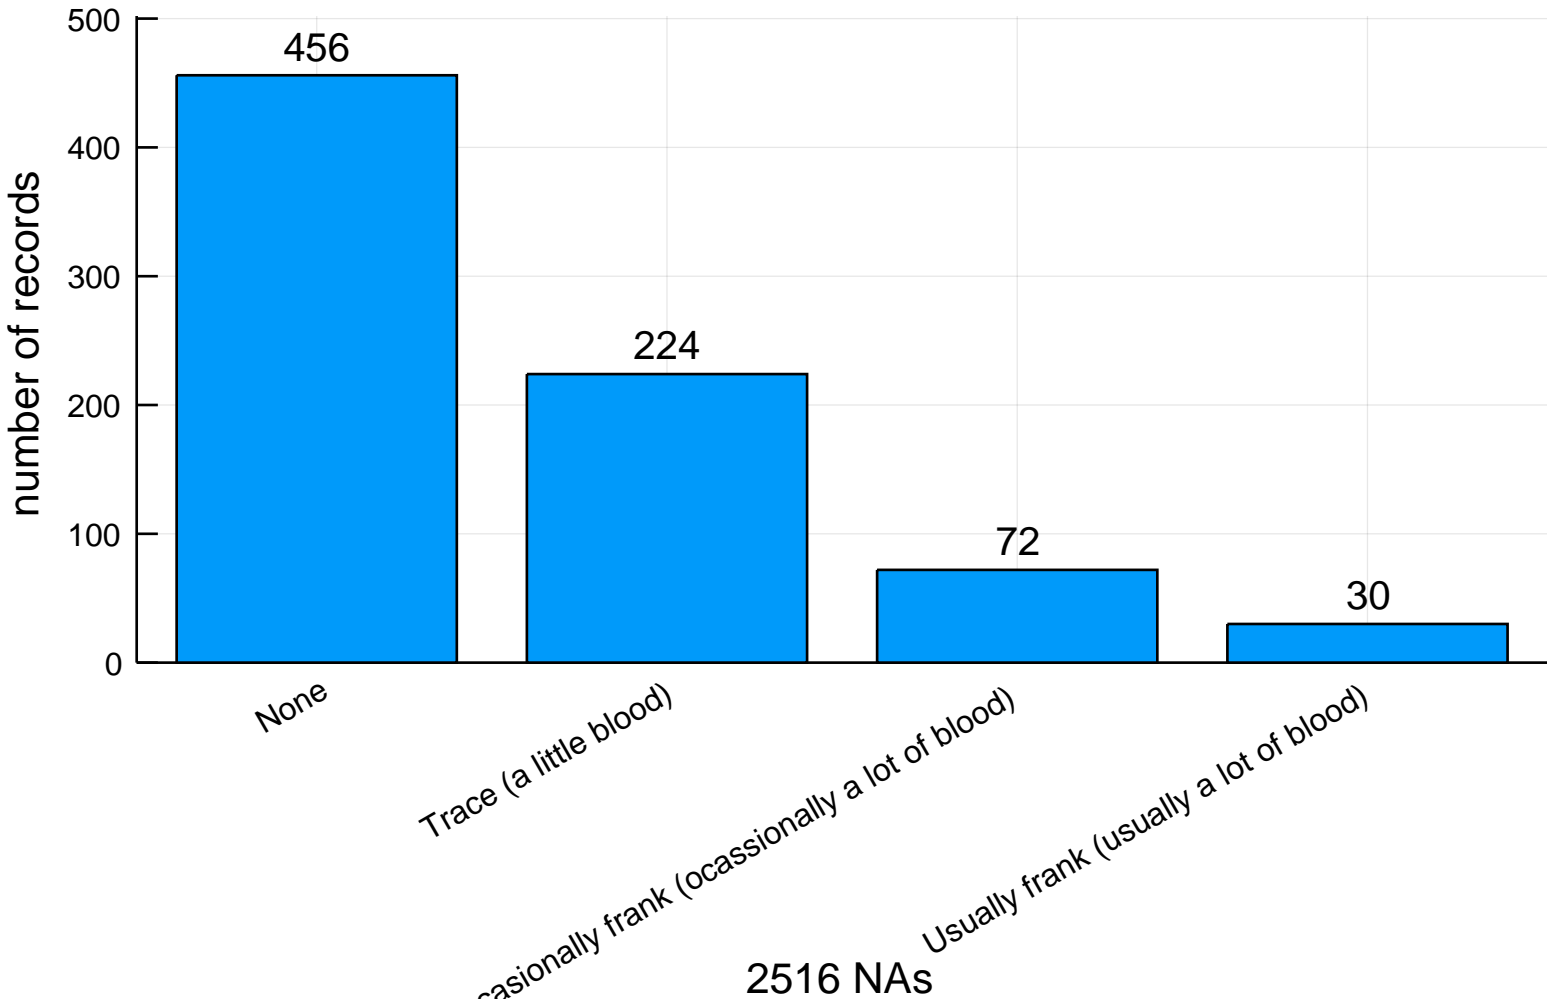

# BMI (per Participant\_ID)

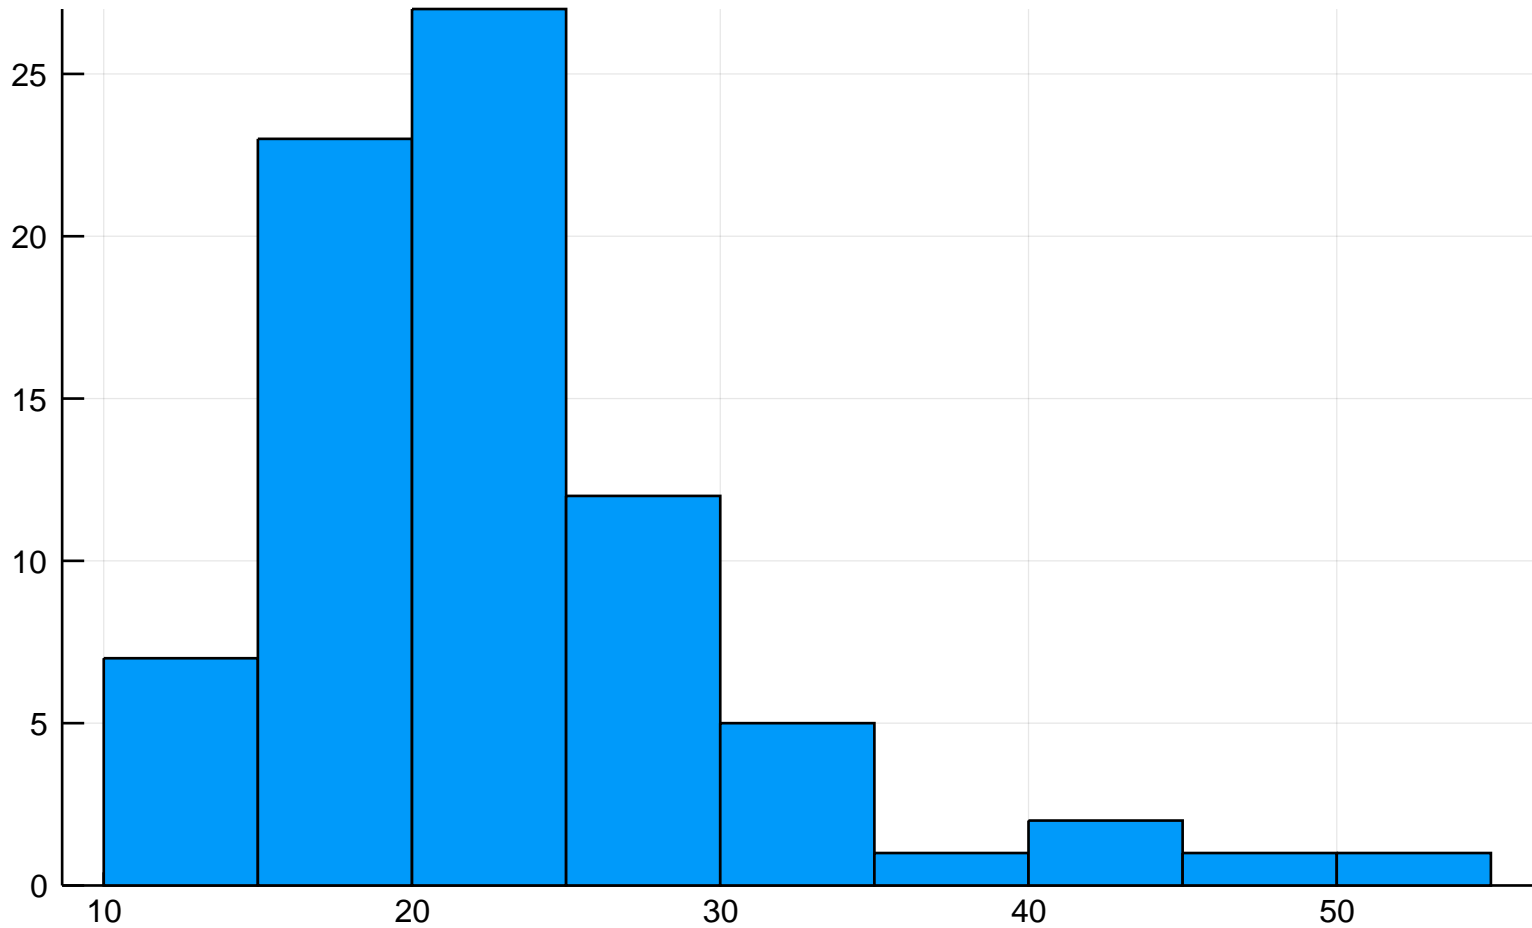

Mean: 22.86, stdev: 7.13

# Bowel frequency during the day (per row)

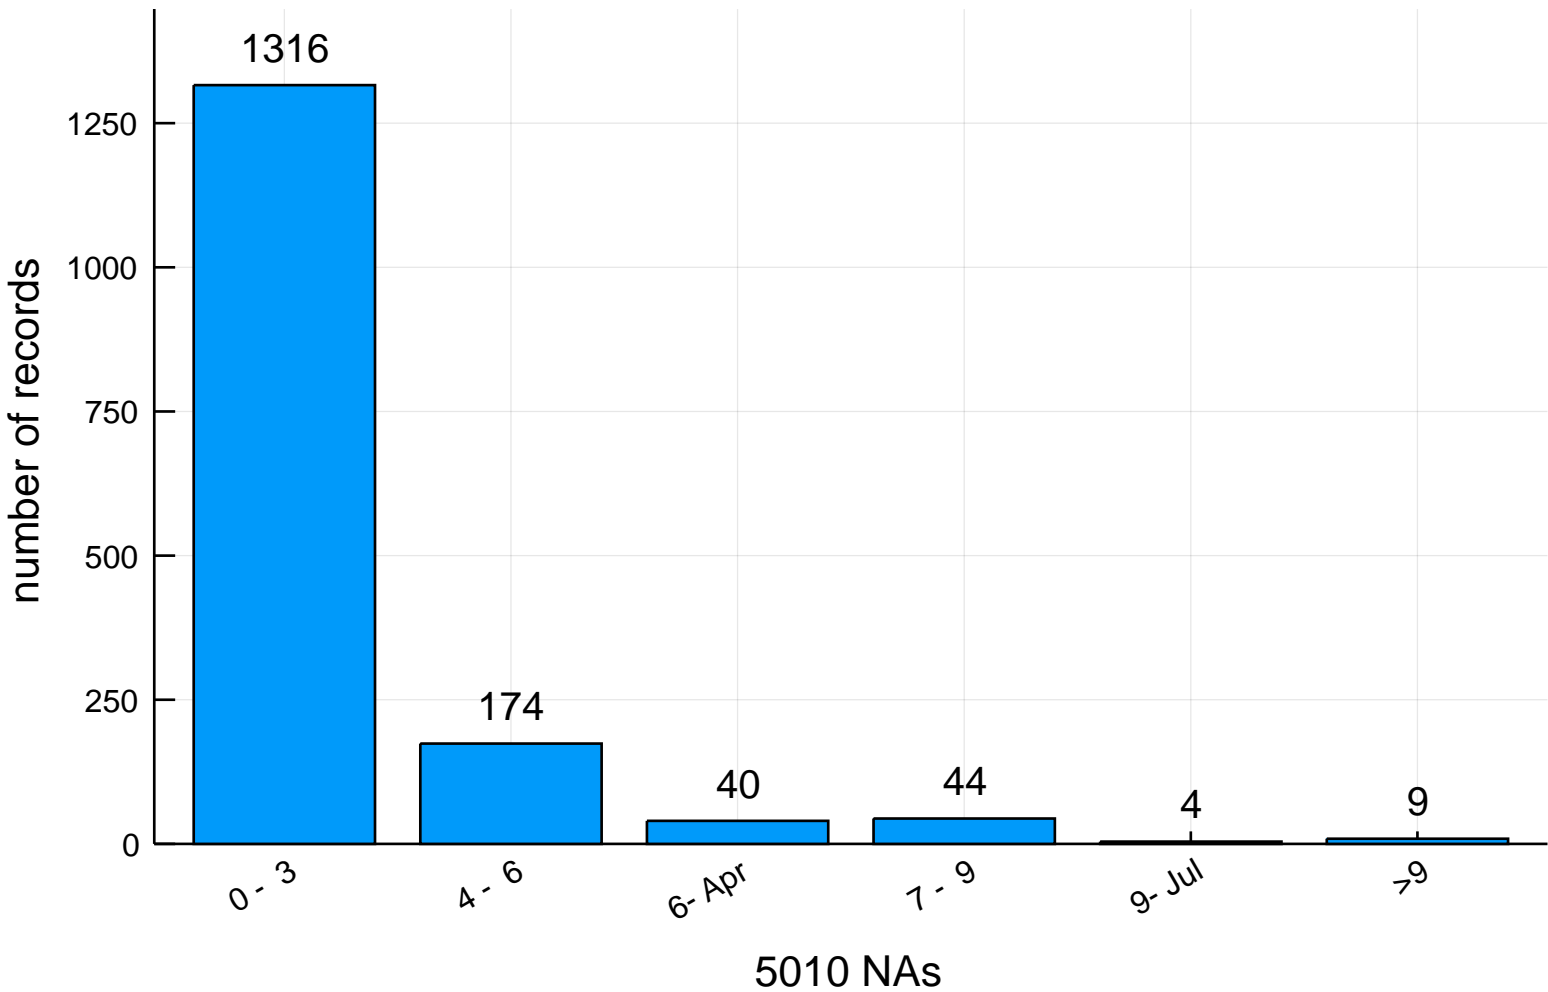

# Bowel frequency during the night (per row)

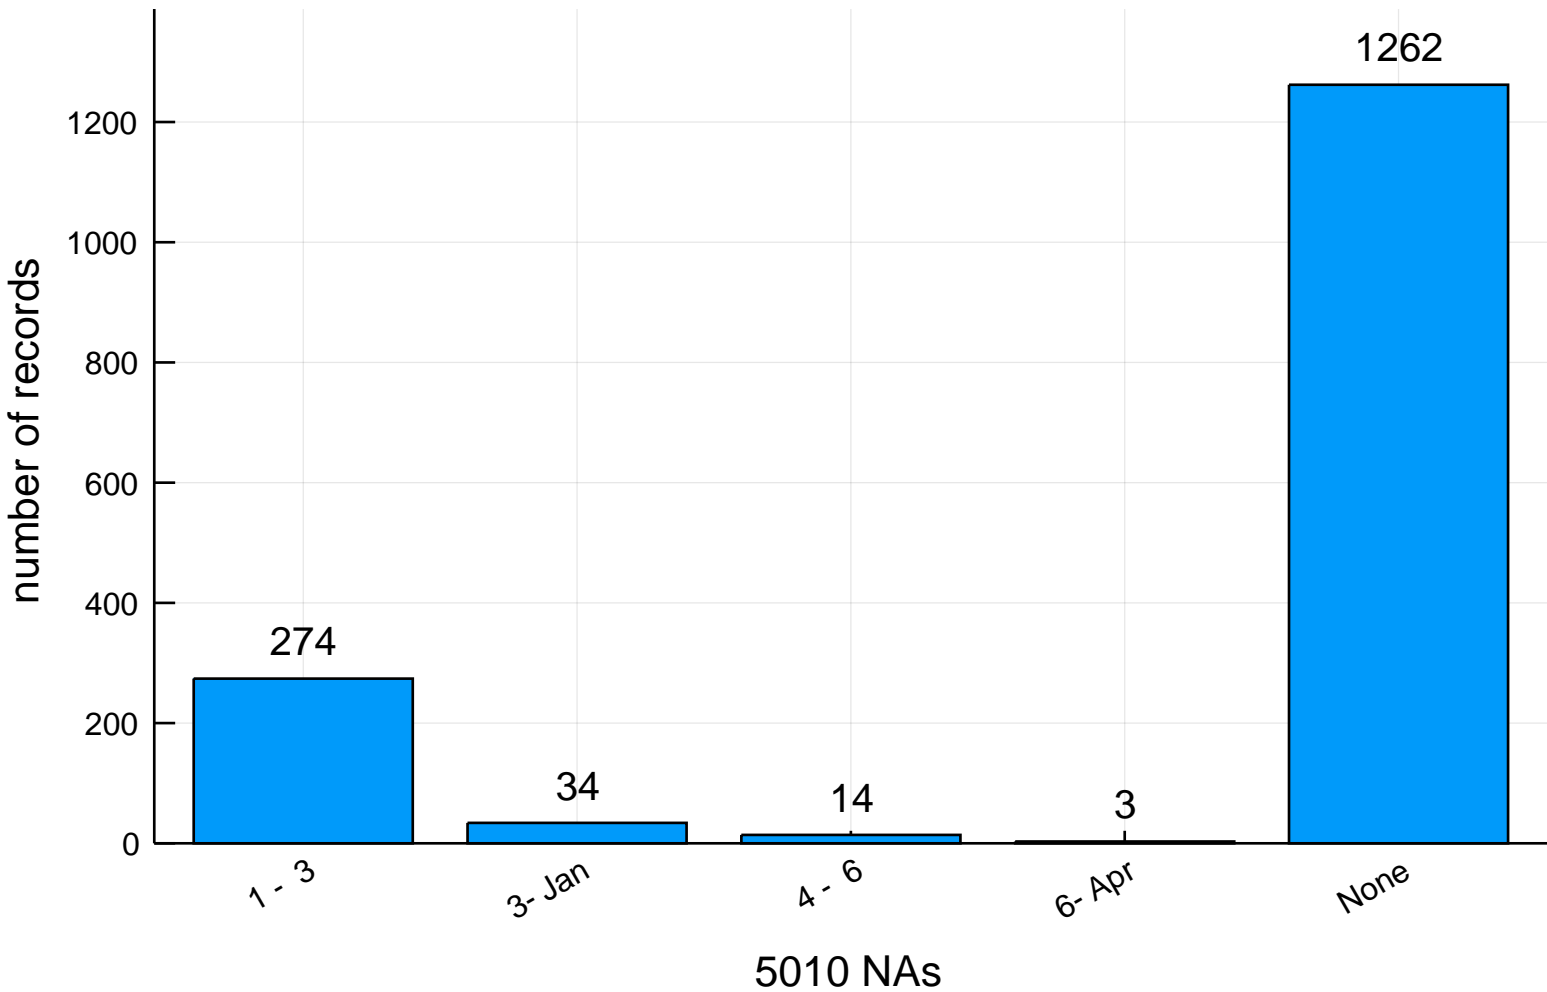

# Canasa suppositories mesalamine supposit (per site\_sub\_col

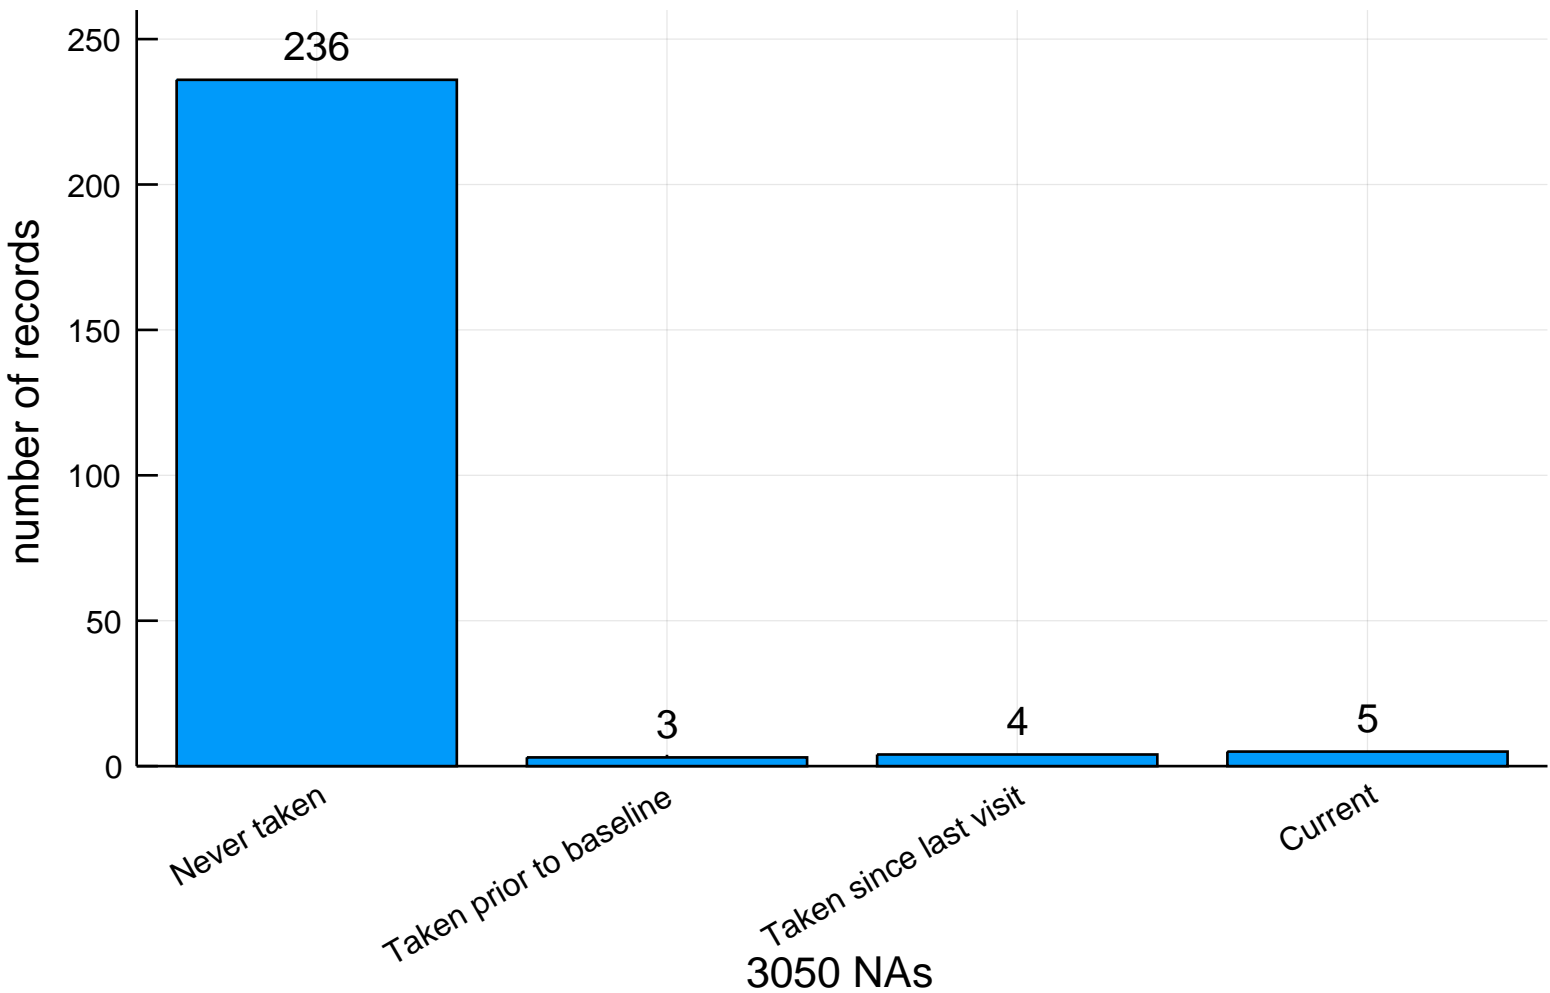

# Chemotherapy (per site\_sub\_coll)

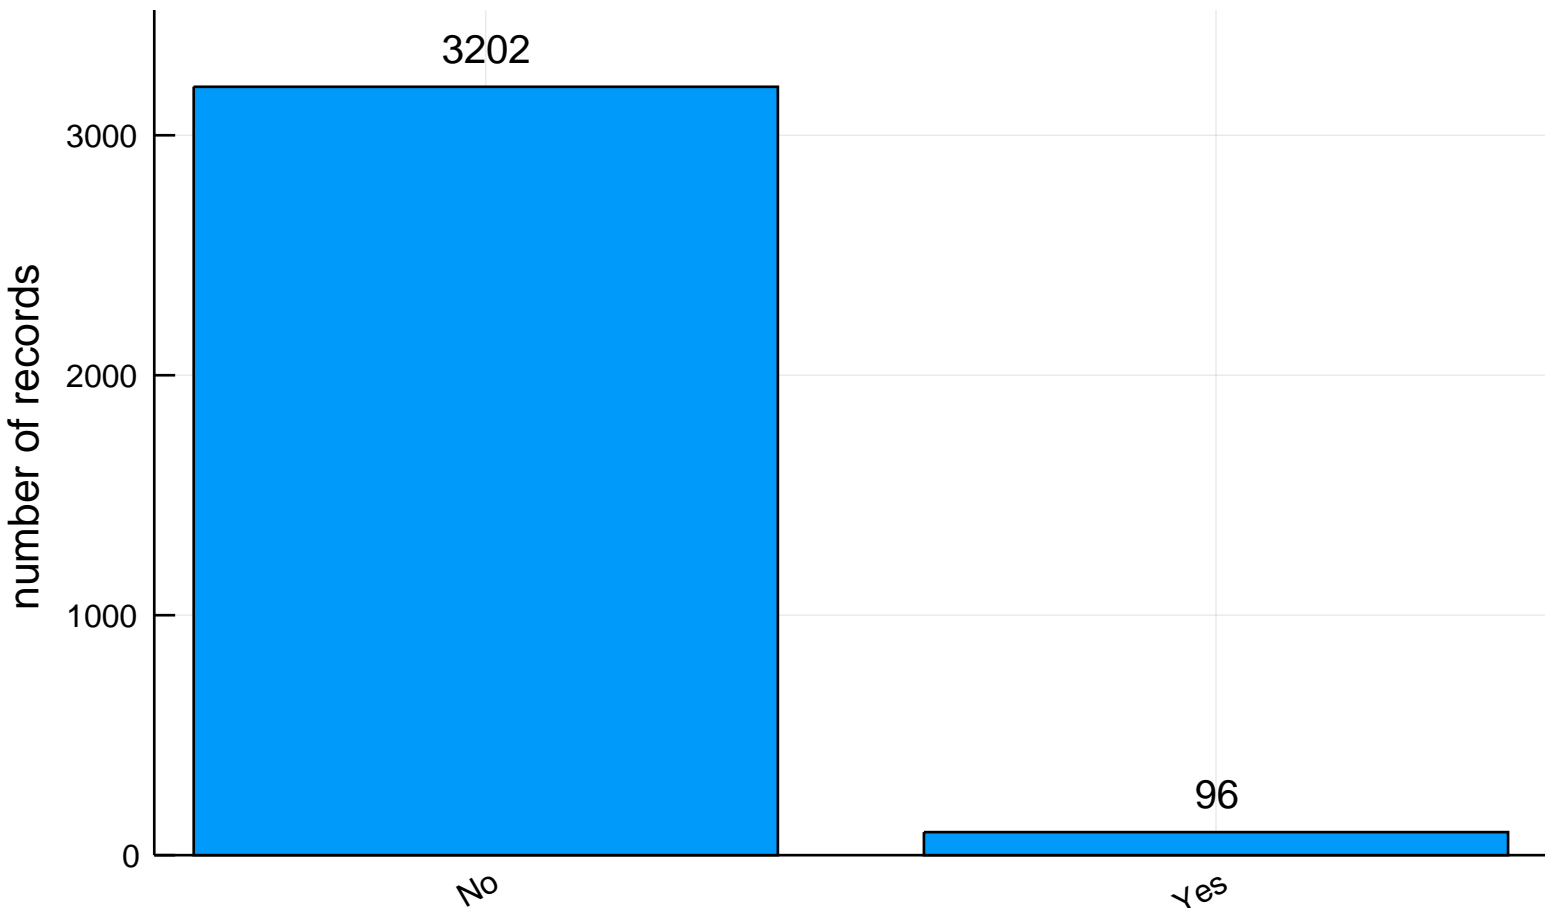

0 NAs

# Cimzia Certlizumab (per site\_sub\_coll)

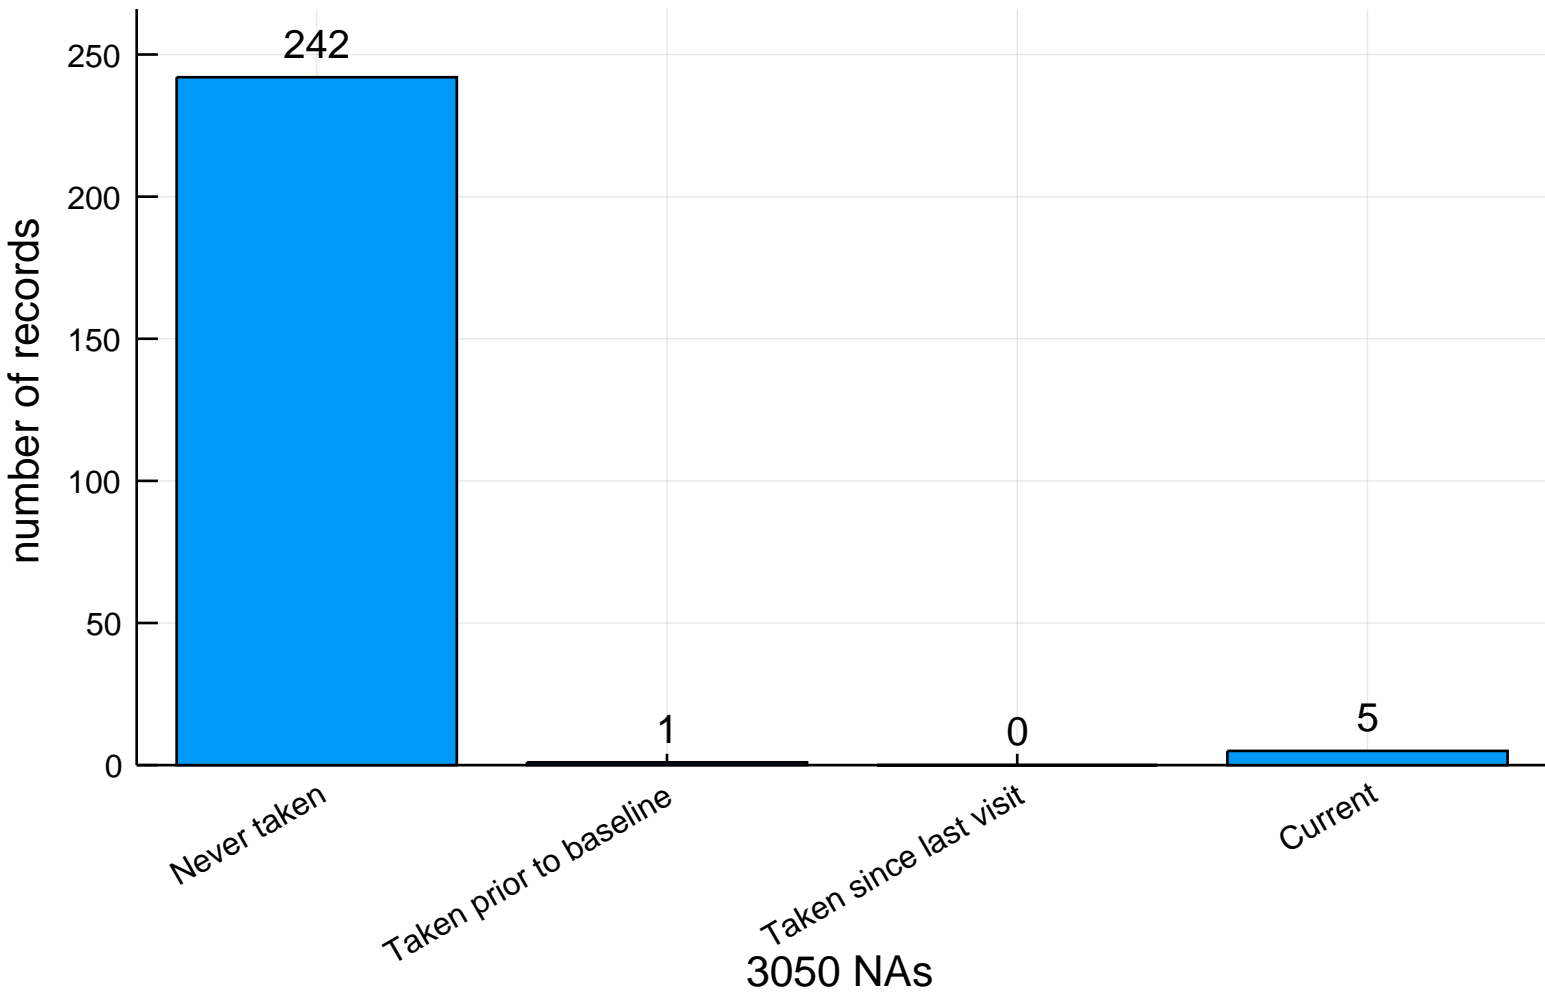

# Cipro Ciprofloxacin (per site\_sub\_coll)

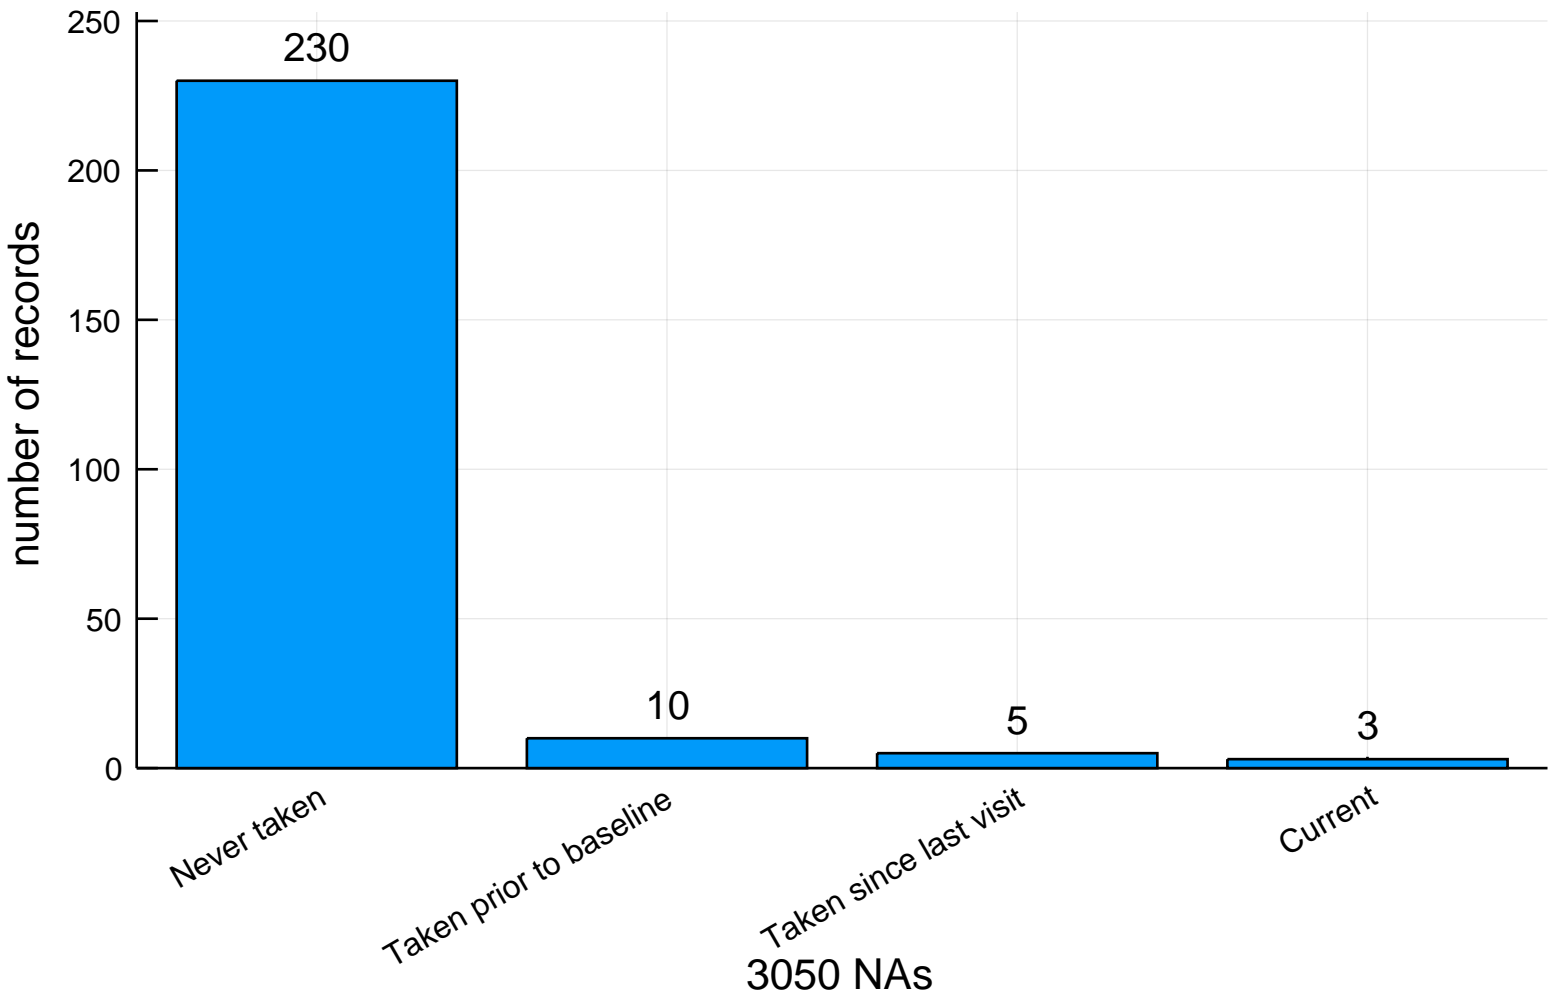



# Colozal balasalizide (per site\_sub\_coll)

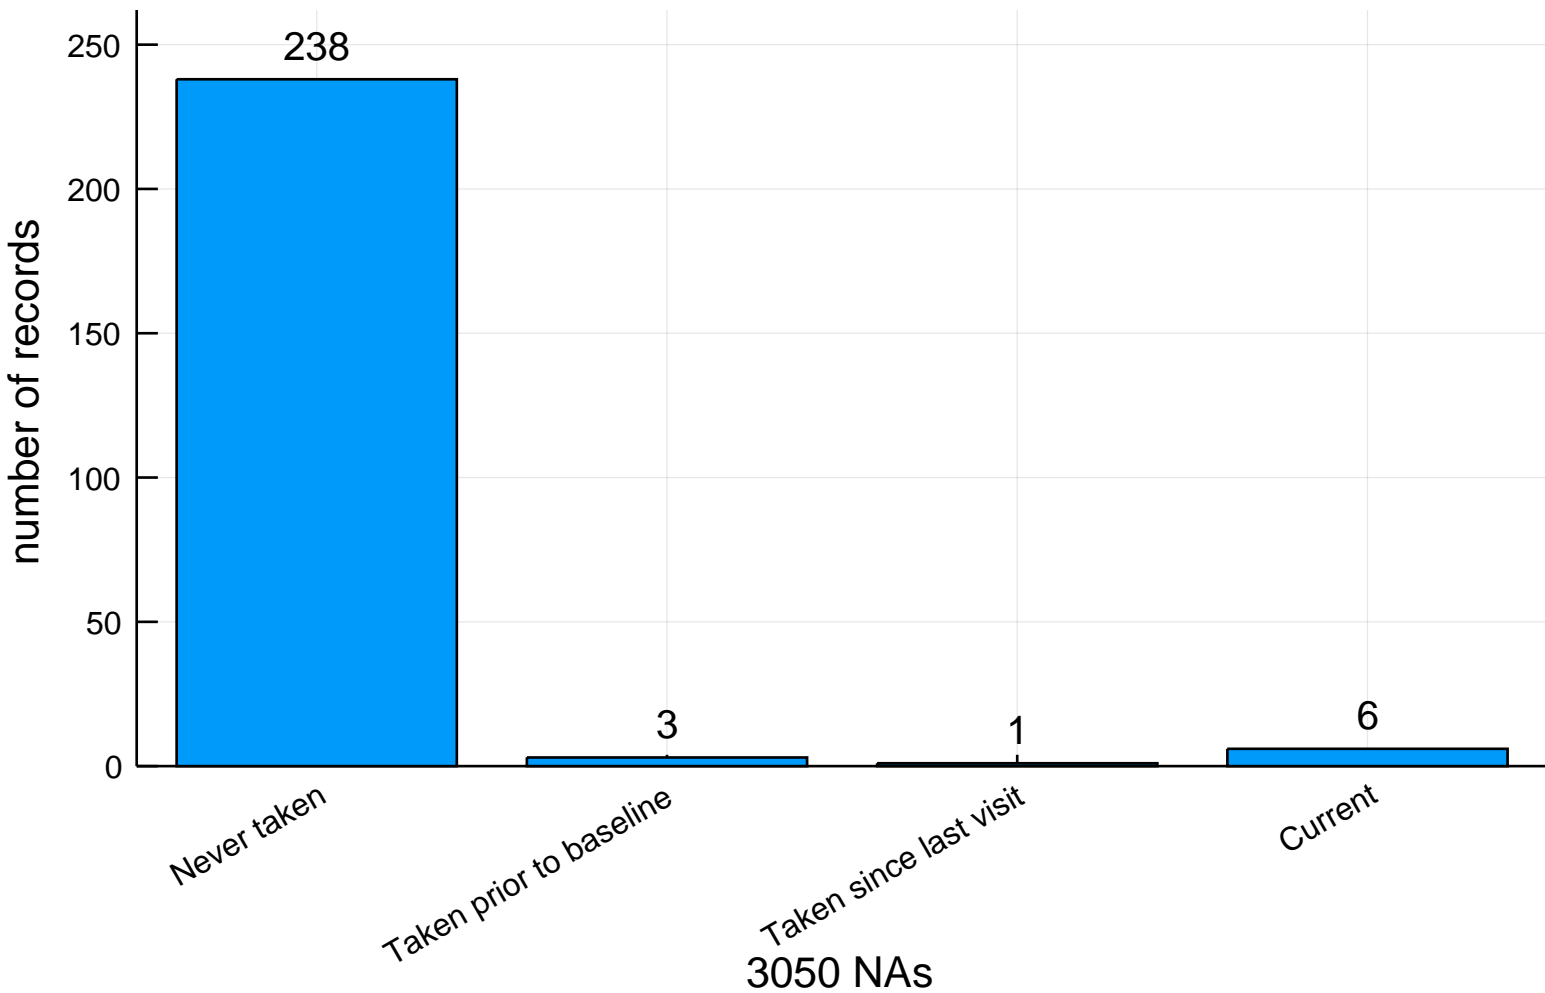

# consent age (per row)

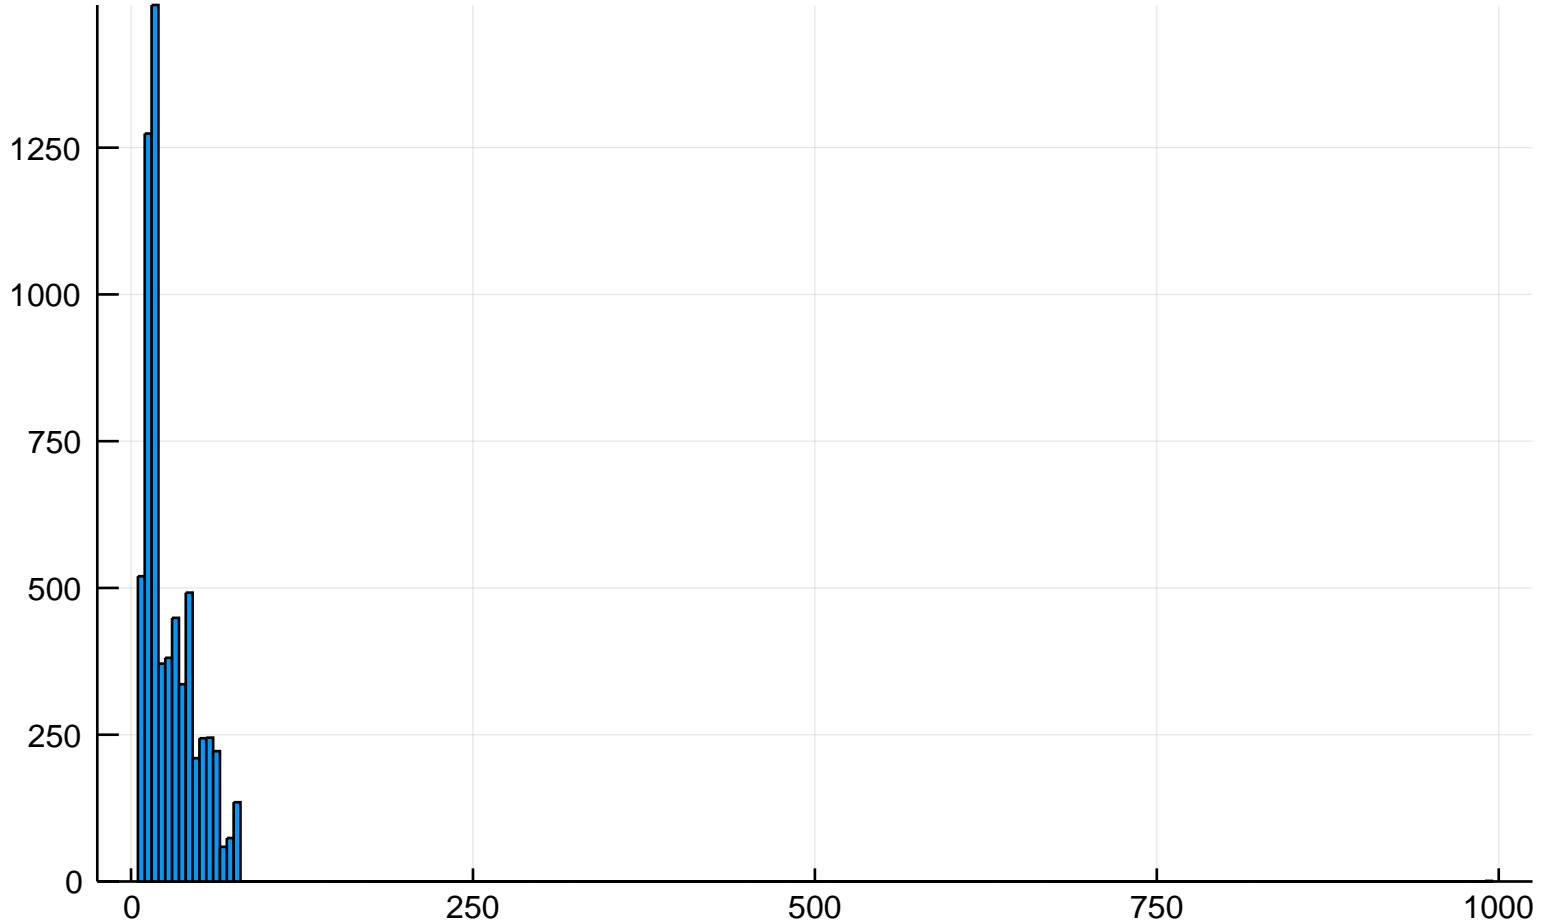

Mean: 27.58, stdev: 21.61

# Cortenemas Cortifoam Proctofoam (per site\_sub\_coll)

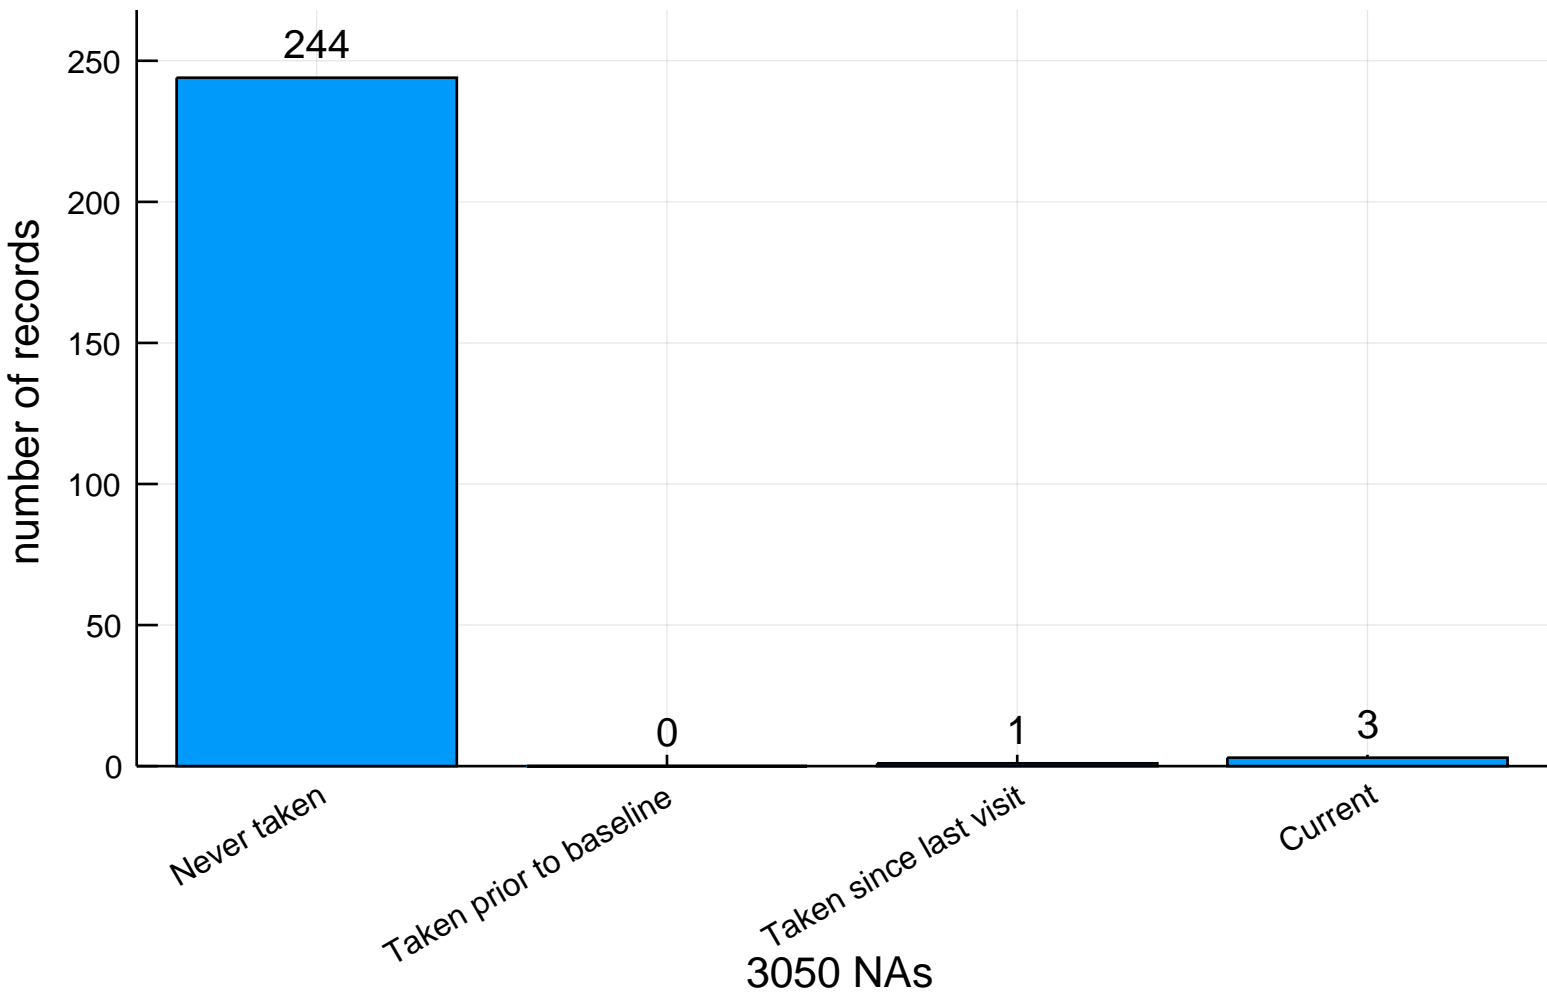

# CRP mg L (per site\_sub\_coll)

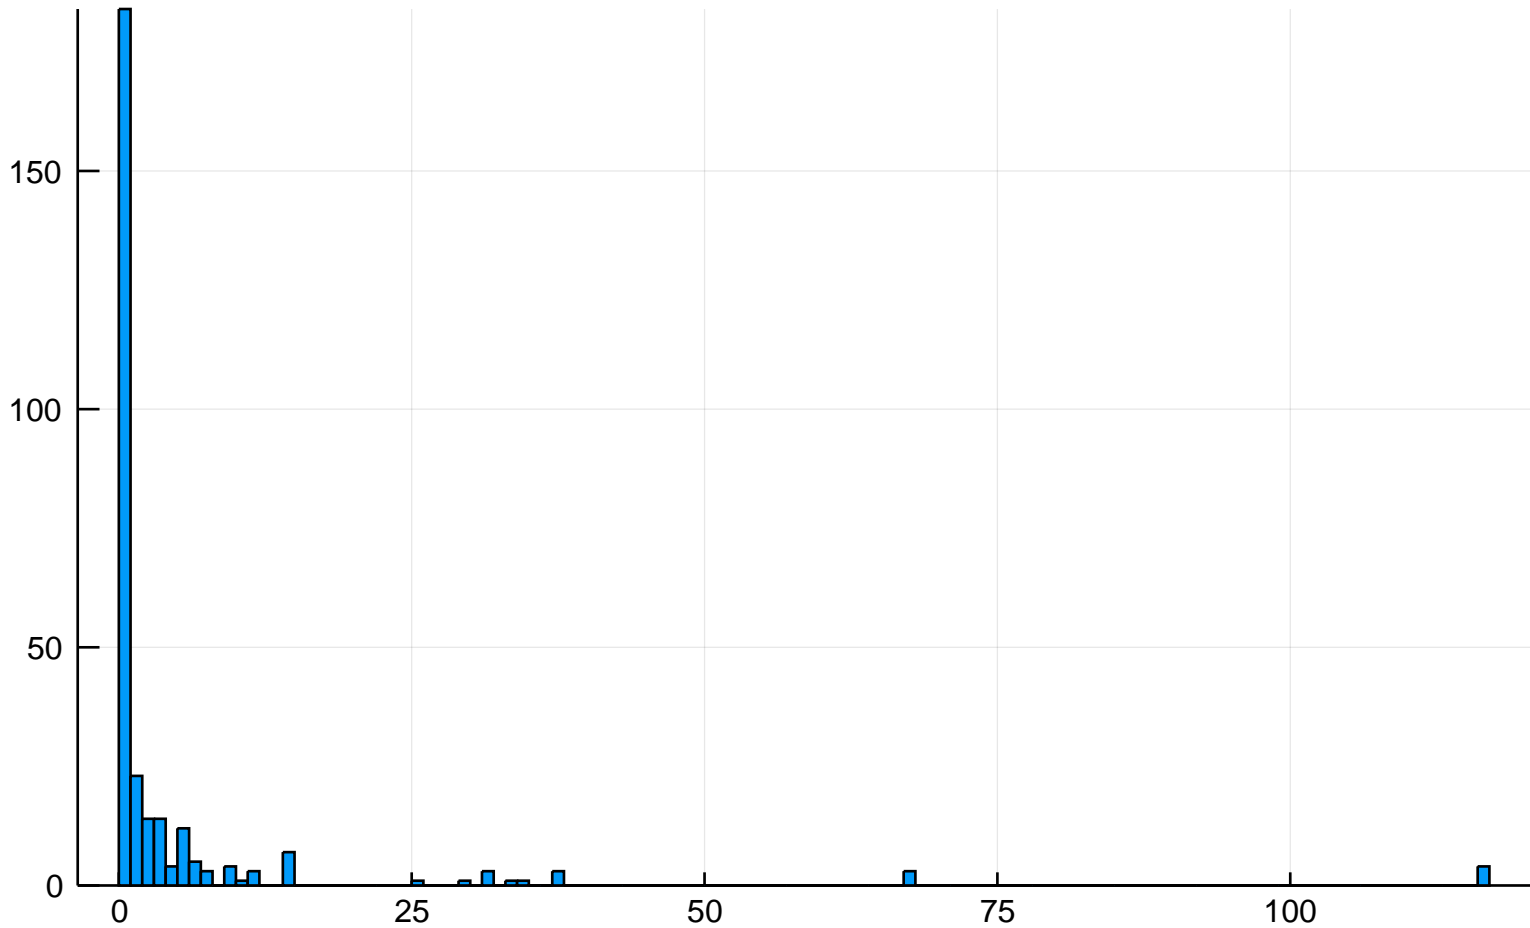

Mean: 5.07, stdev: 16.03

# Dairy milk cream ice cream cheese cream (per row)

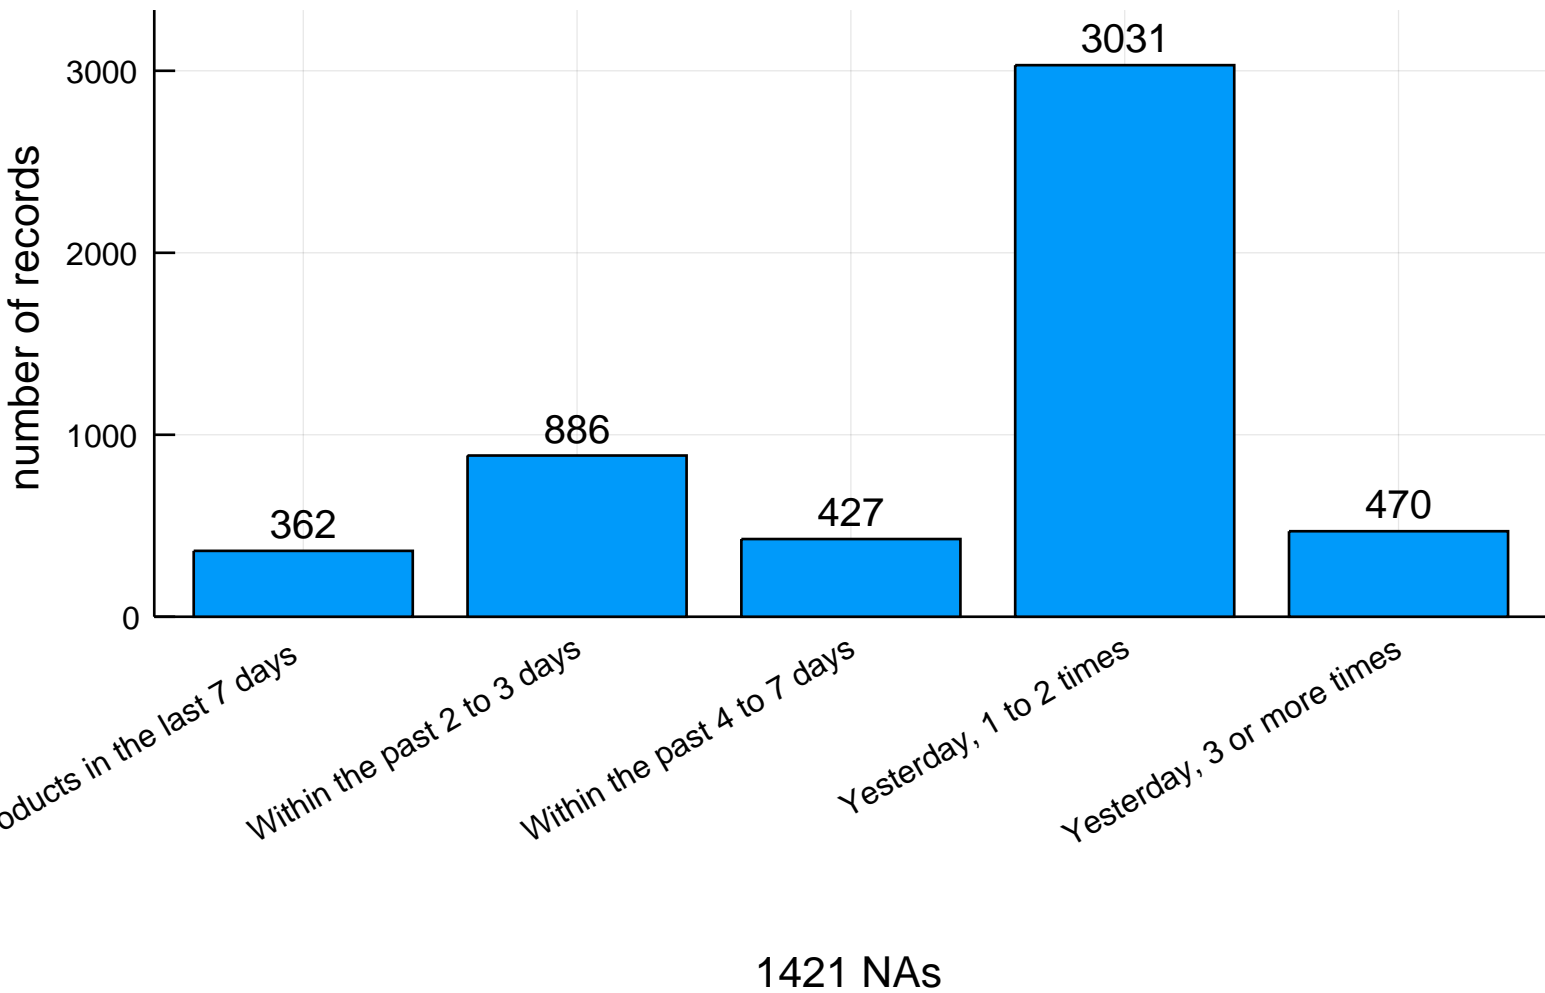

# data type (per row)

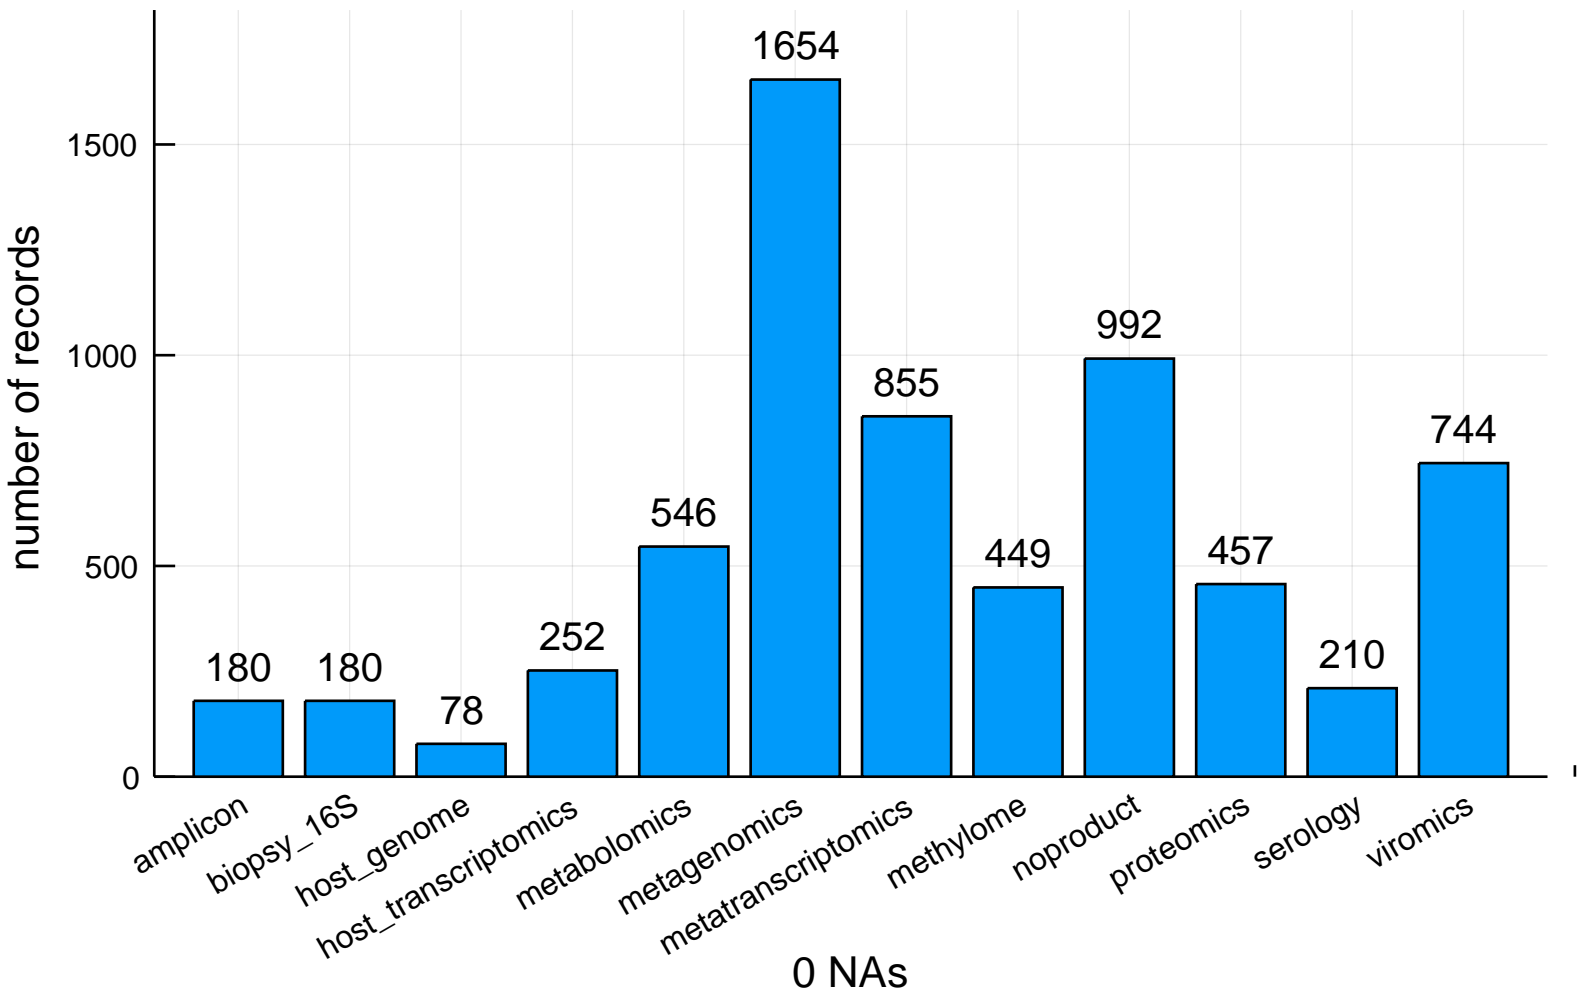

# diagnosis (per row)

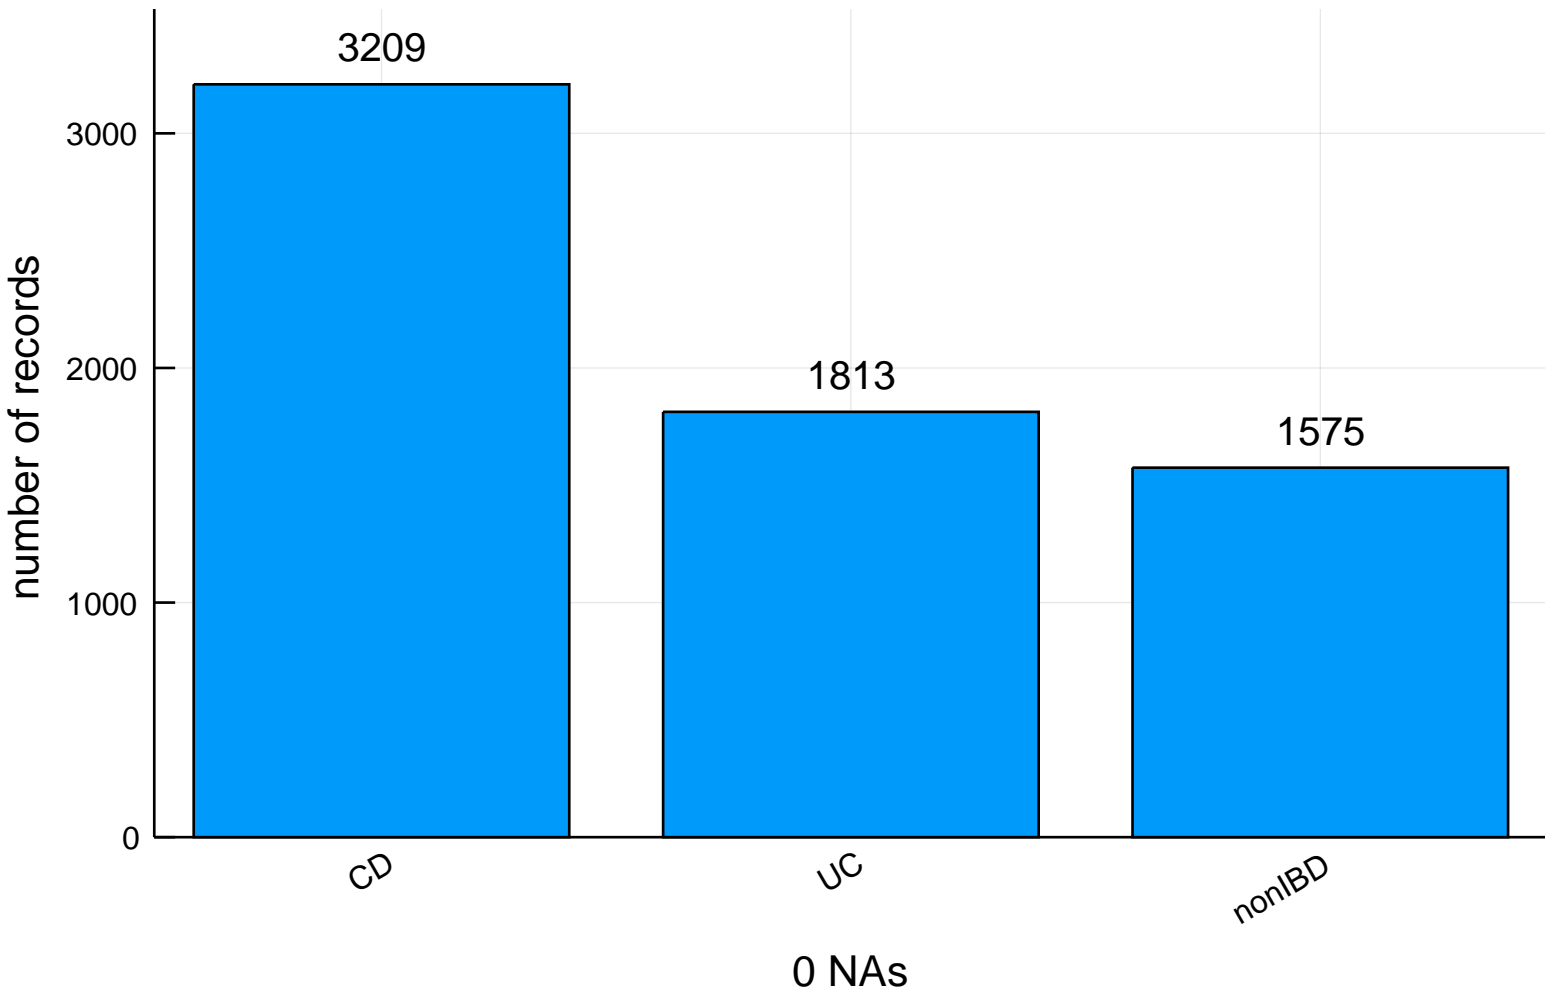

# Did the subject withdraw from the study (per Participant\_ID)

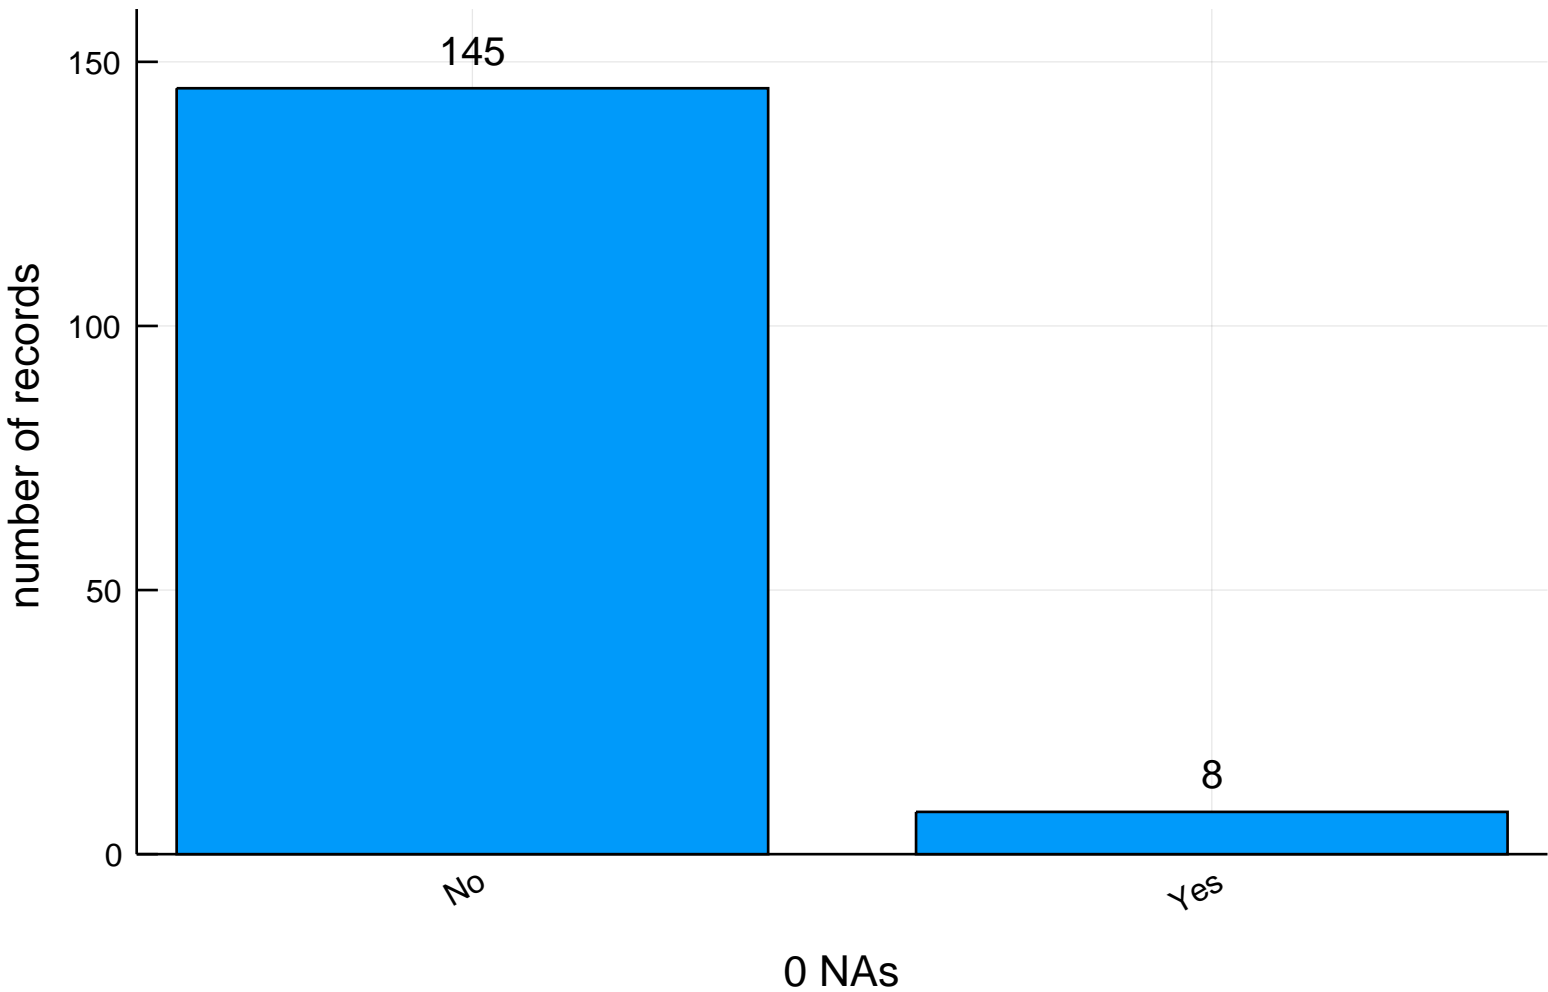



# Did you attend daycare as a child (per Participant\_ID)

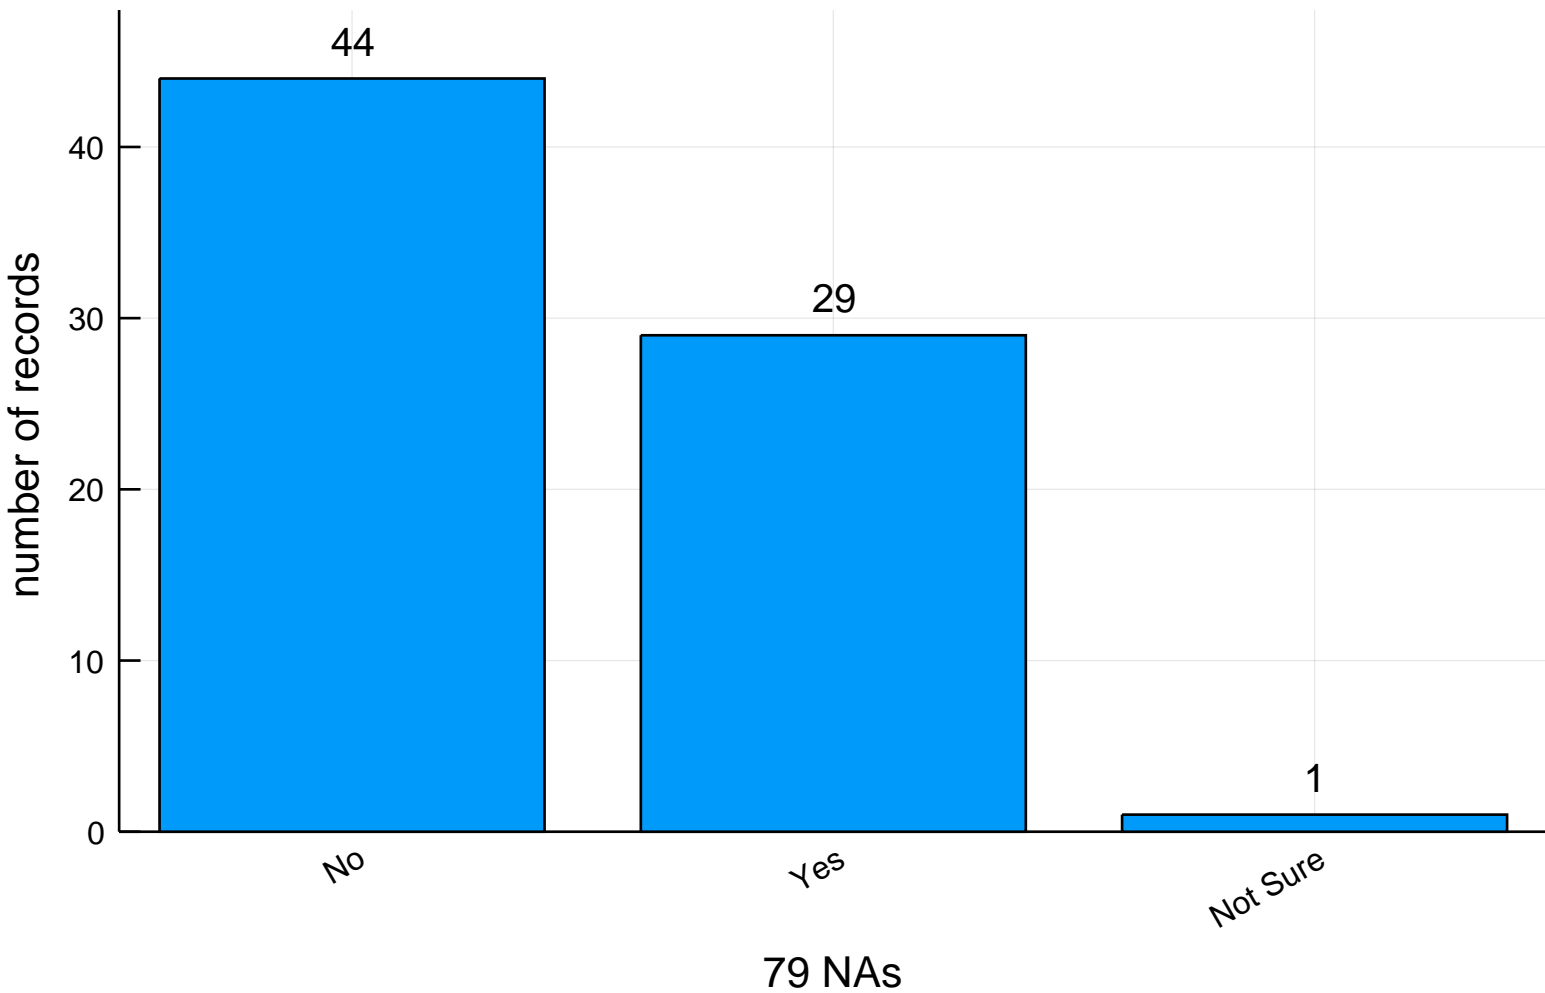

# Did you grow up on a farm (per Participant\_ID)

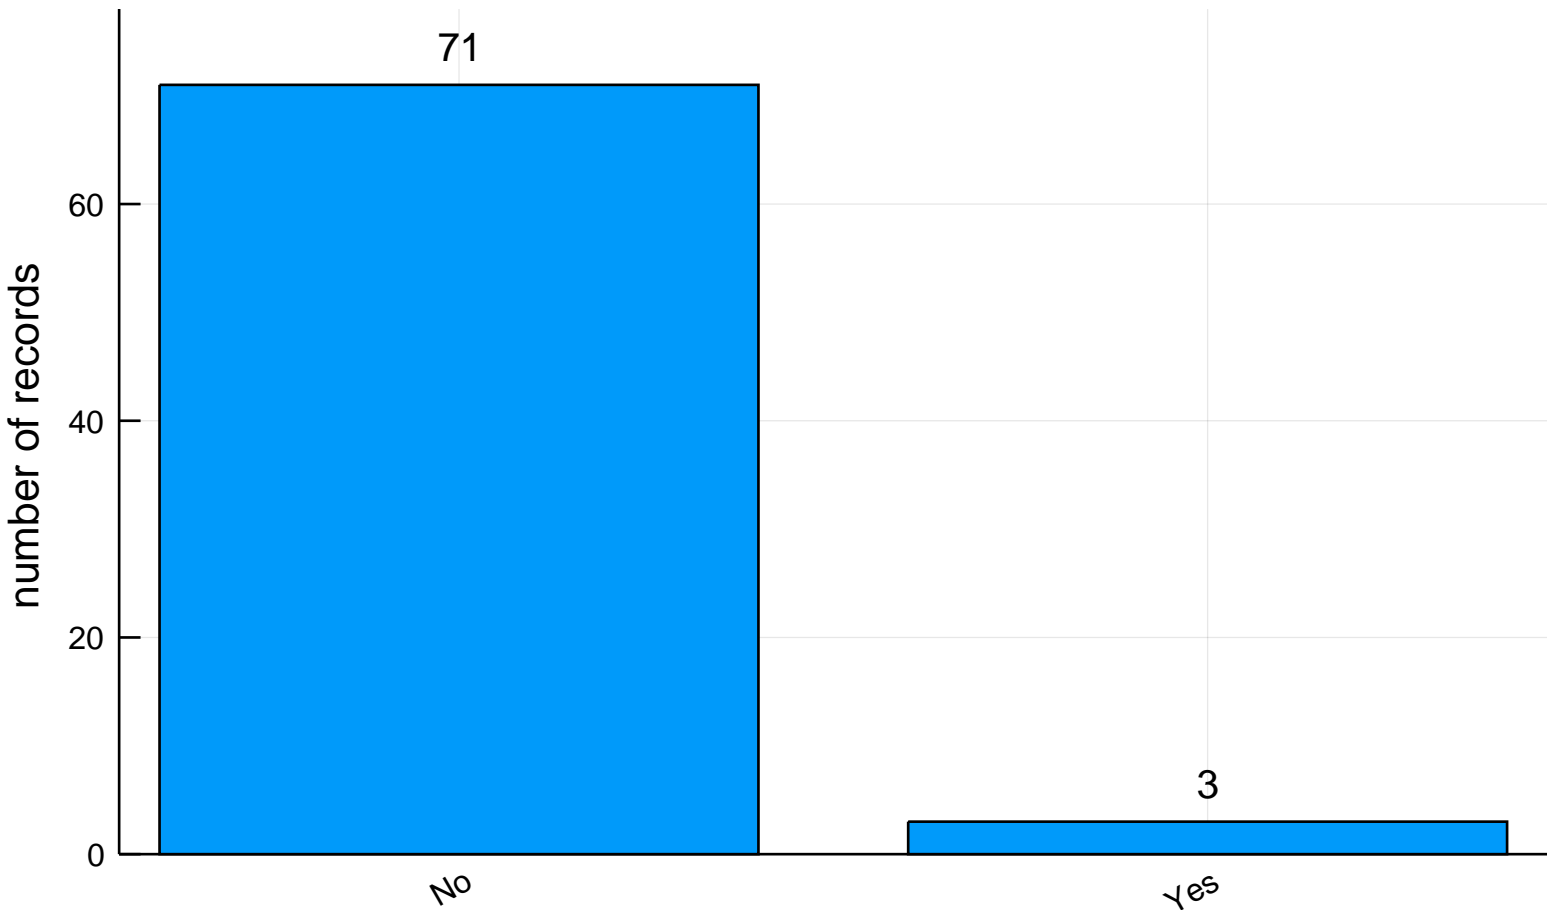

79 NAs

# Did you have pets growing up (per Participant\_ID)

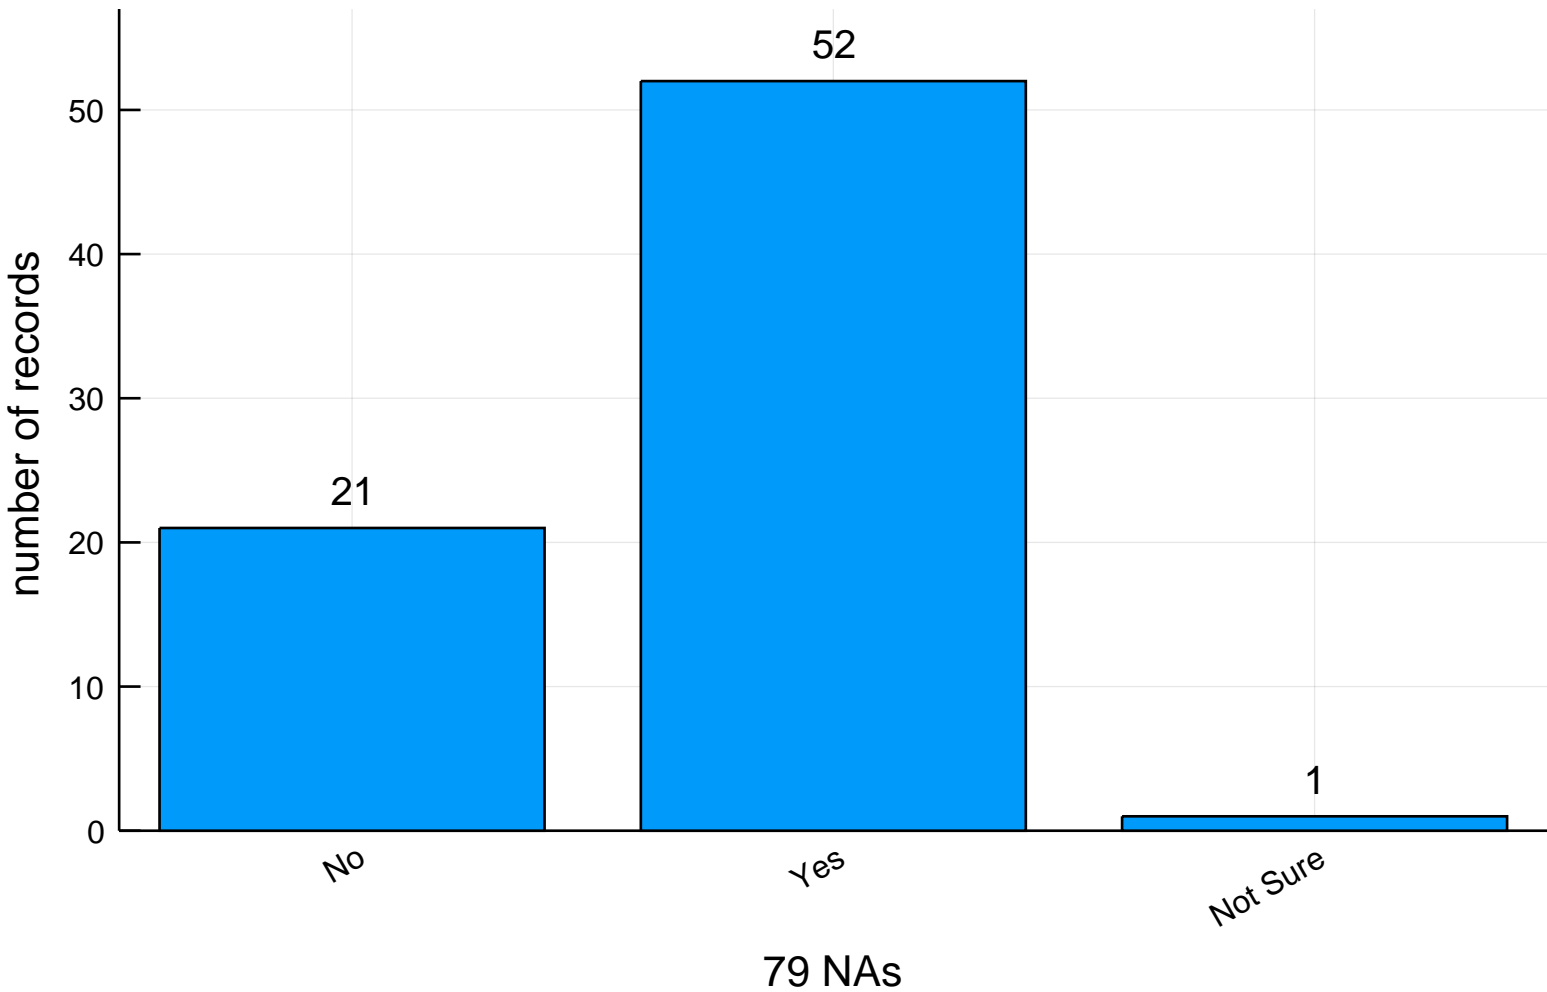

# Diet soft drinks tea or coffee with suga (per site\_sub\_coll)

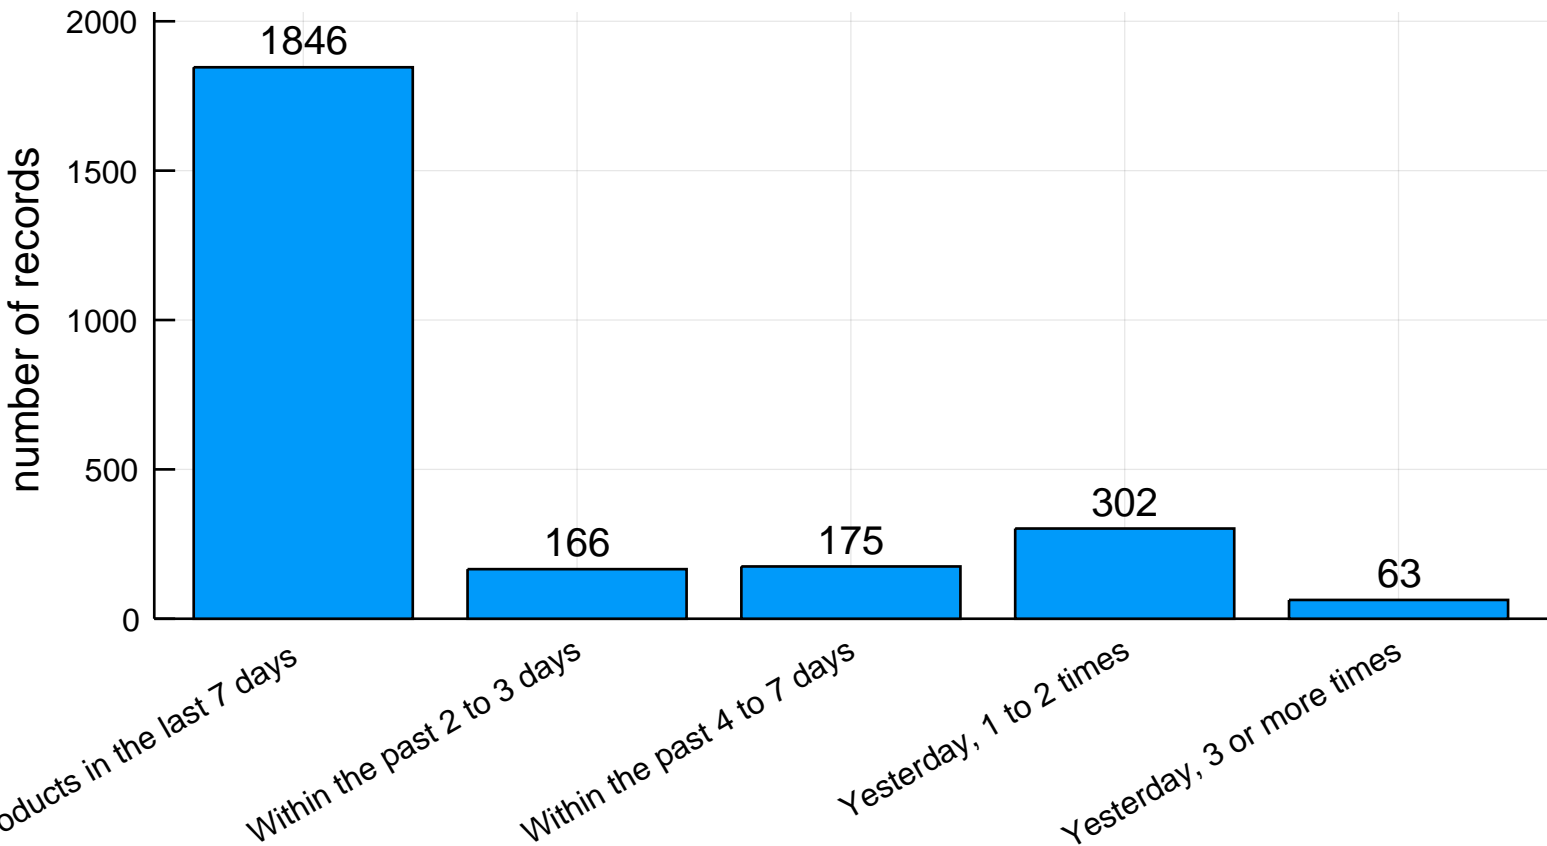

746 NAs

# Dipentum olsalazine (per Participant\_ID)

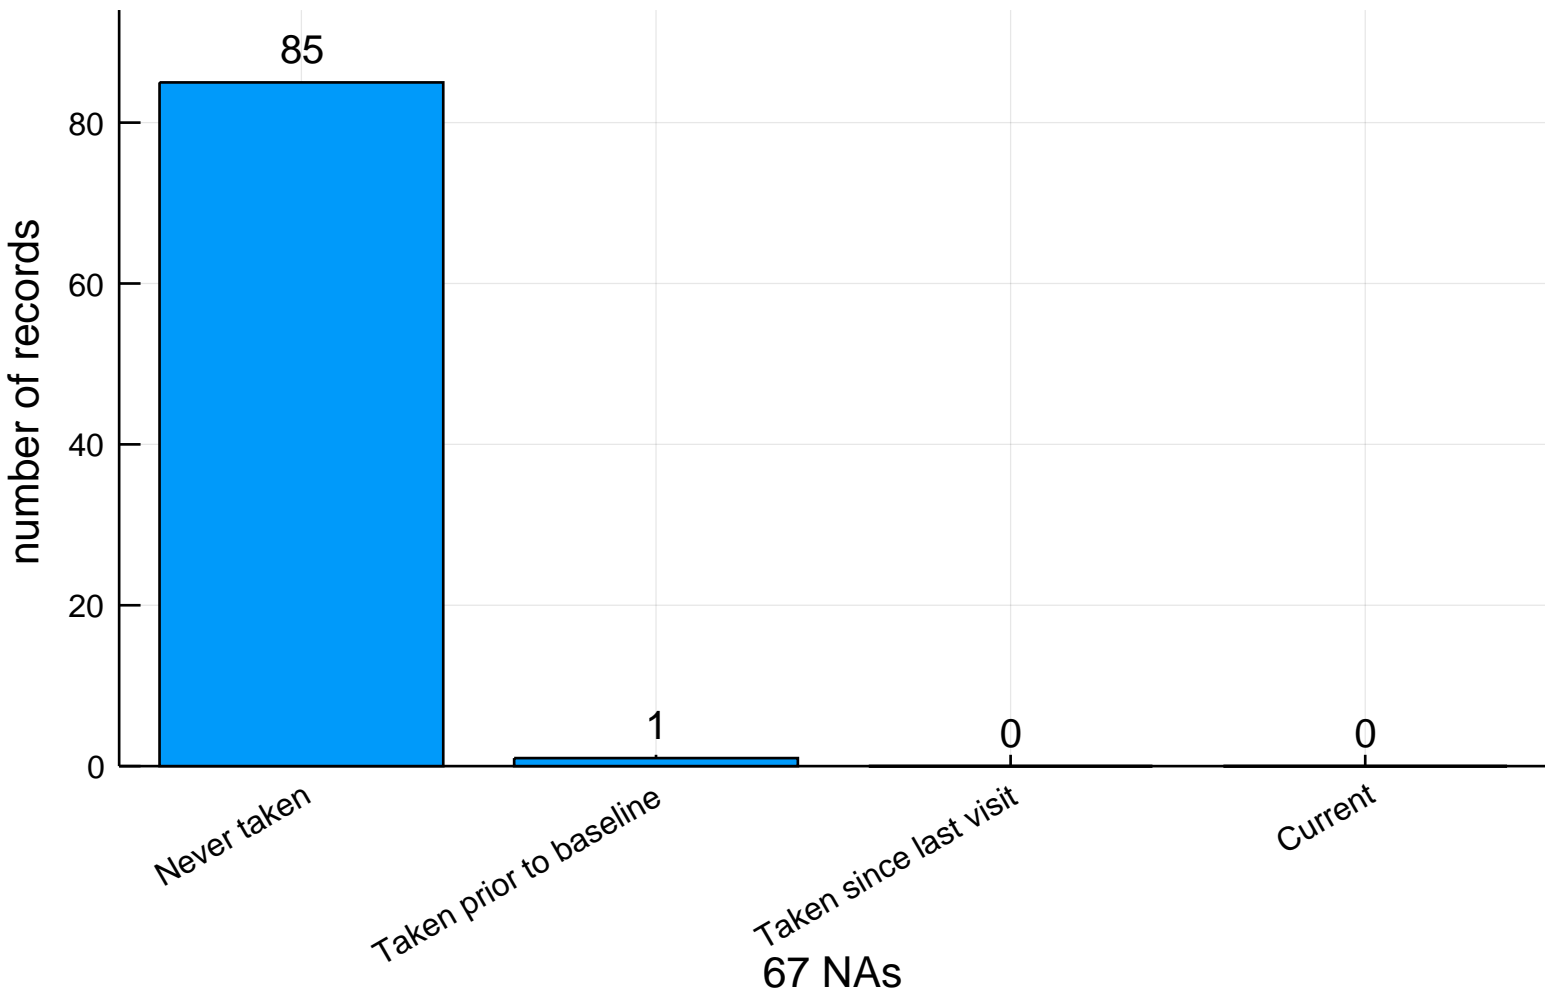

# Disease course (per Participant\_ID)

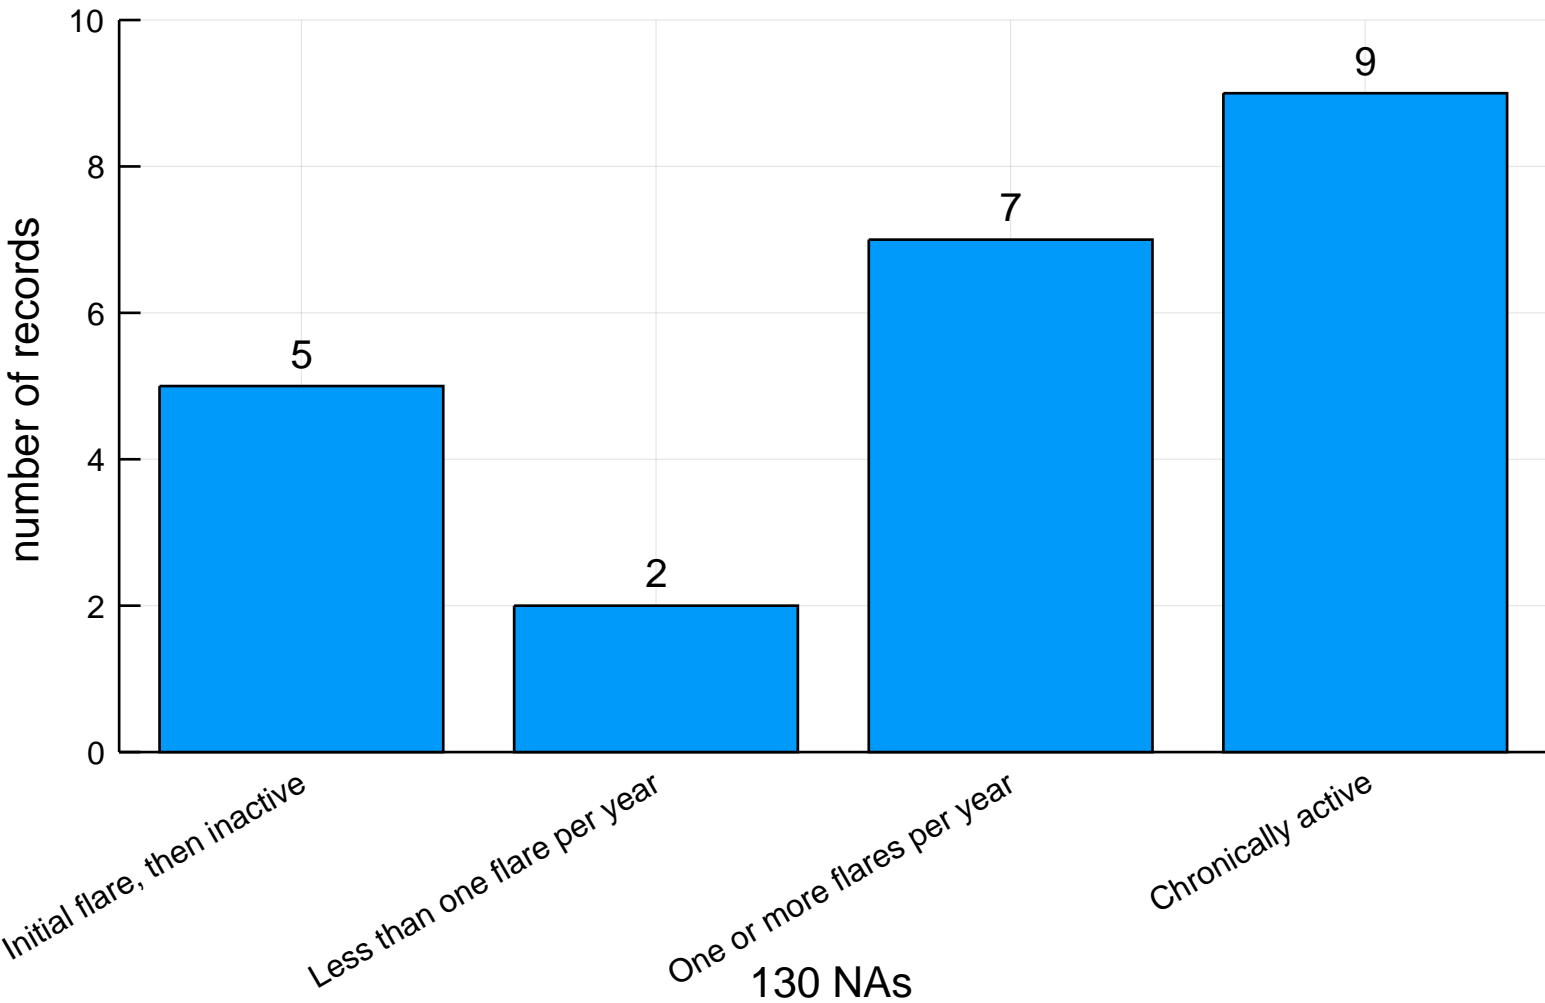

# Distant Relative (per Participant\_ID)

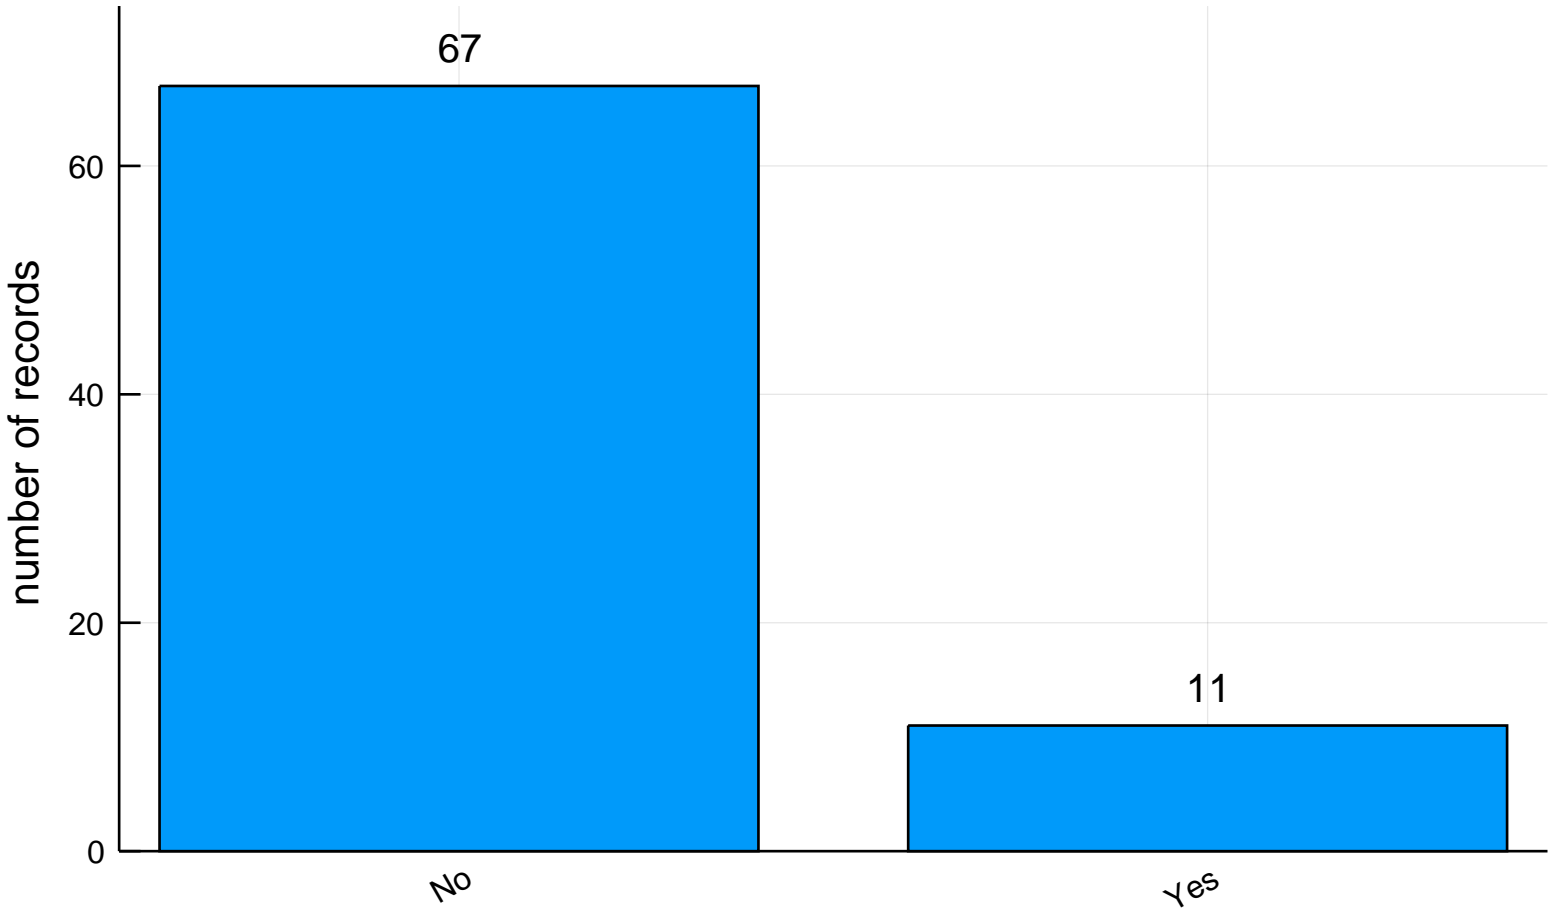

75 NAs

# Do you currently smoke marijuana (per Participant\_ID)

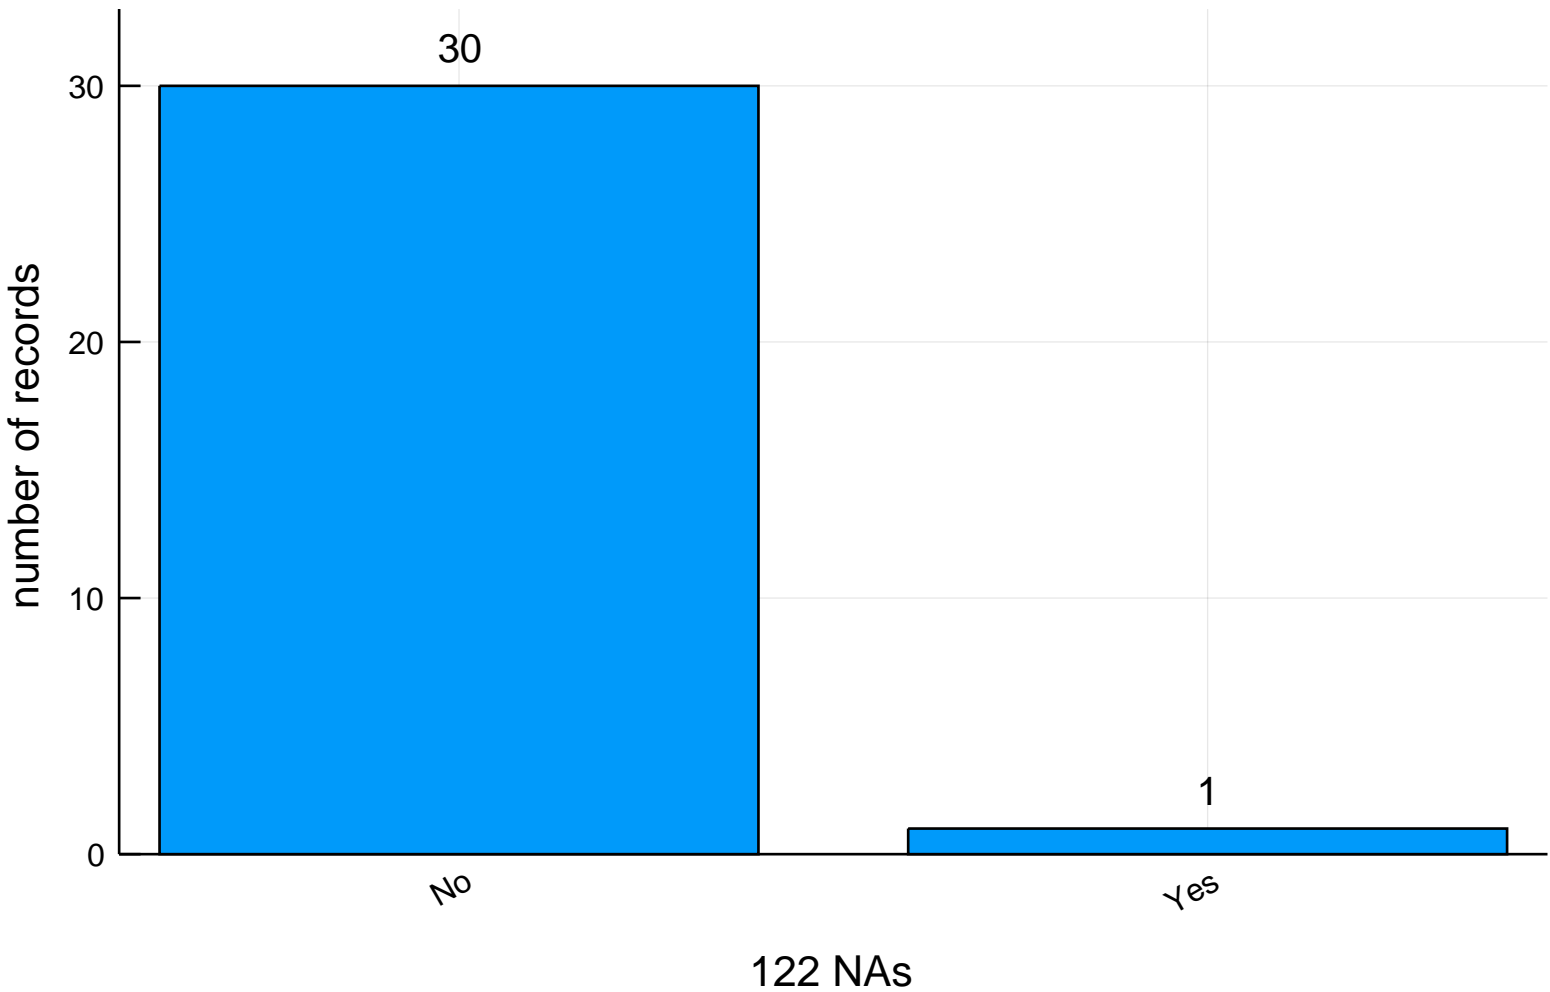



# Do you use non steroidal antiinflammato (per Participant\_ID)

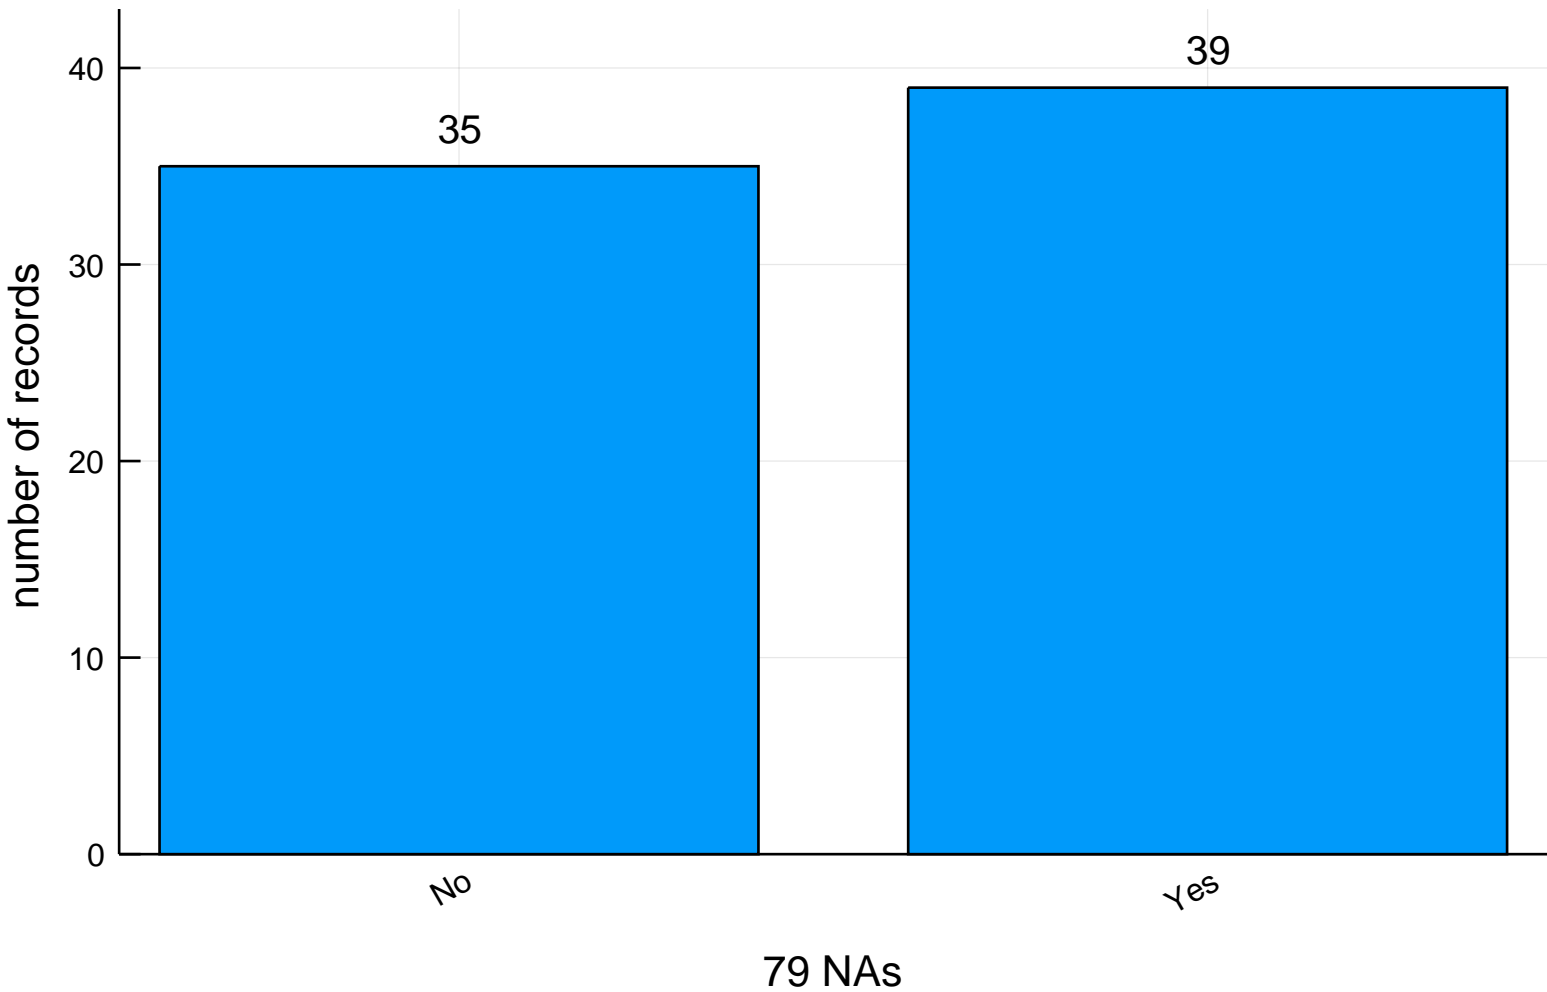

# Duration of Cimzia use months (per site\_sub\_coll)

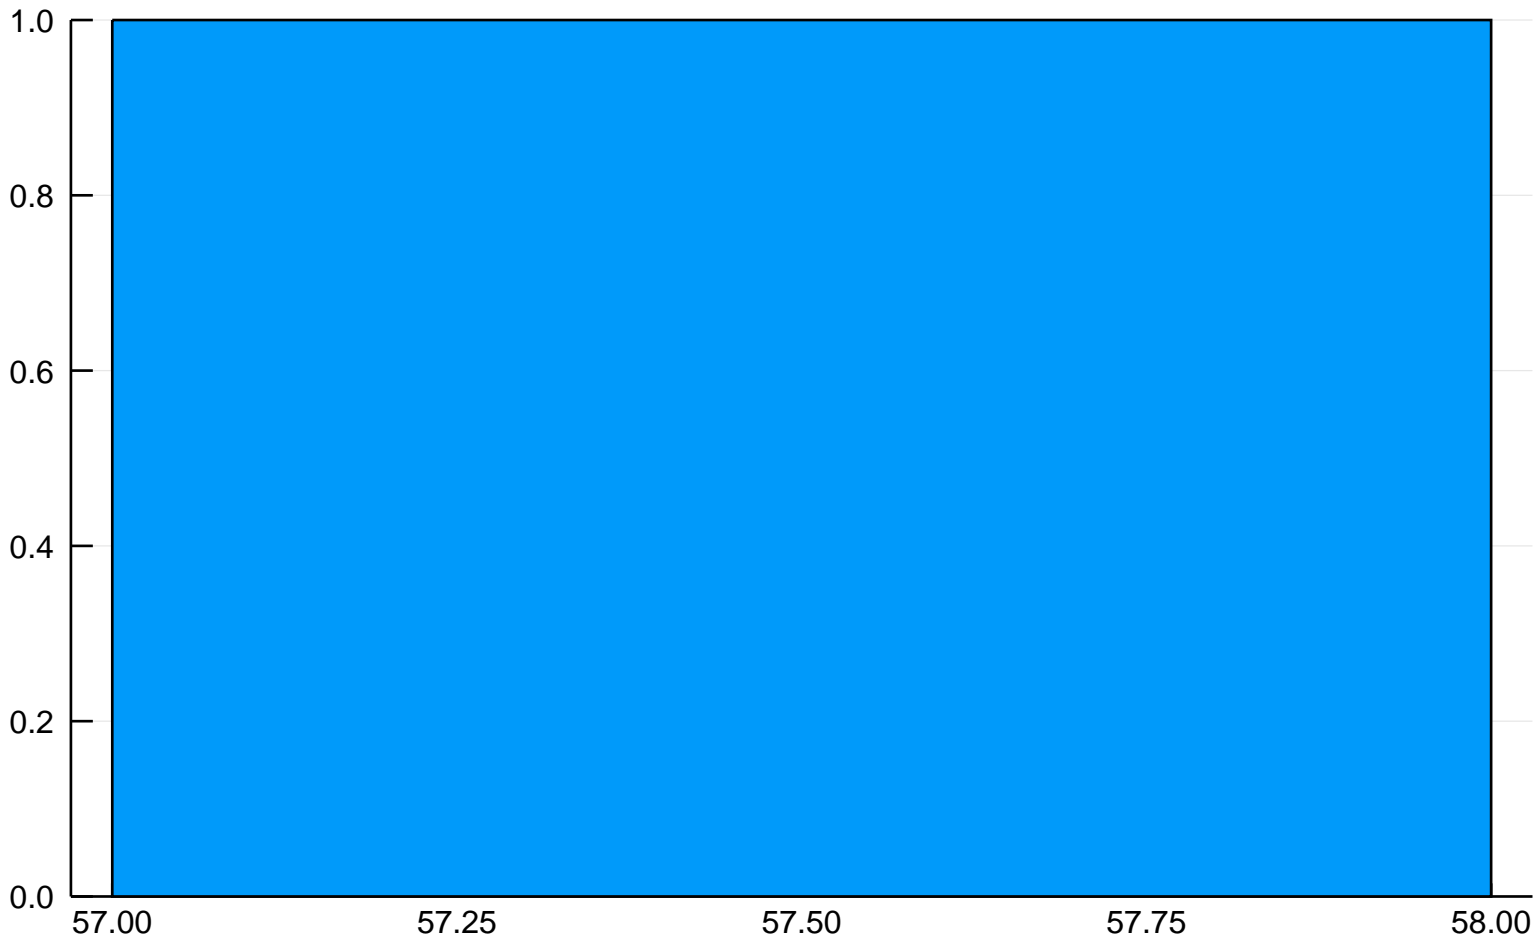

Mean: 57.0, stdev: NaN

Duration of Humira use months (per site\_sub\_coll)

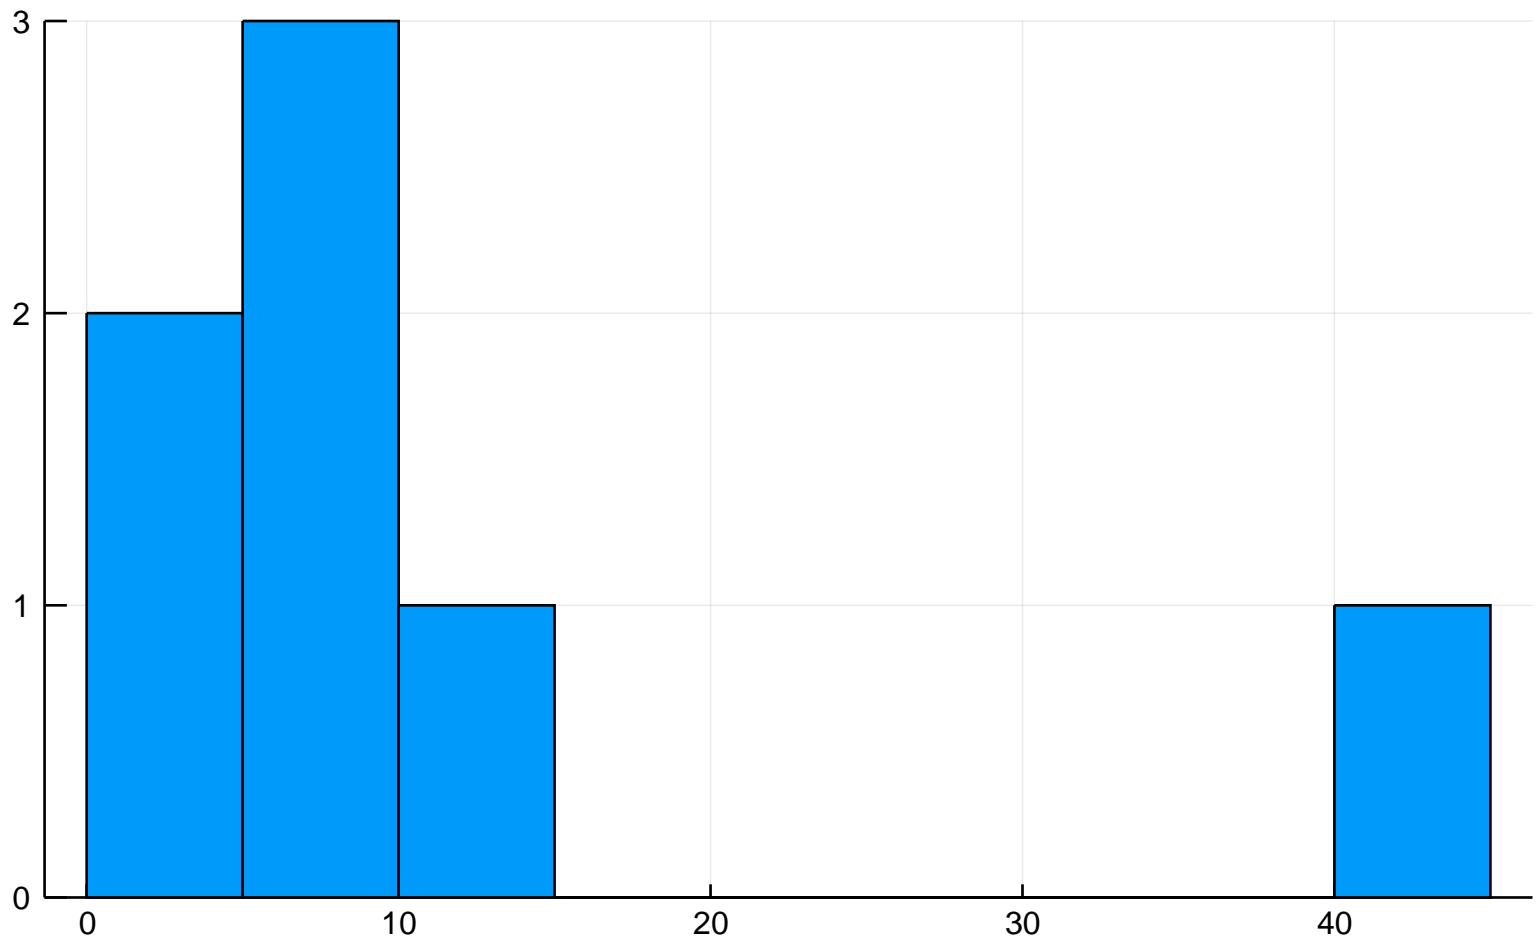

Mean: 11.29, stdev: 13.01

# ECP received at Washington U (per site\_sub\_coll)

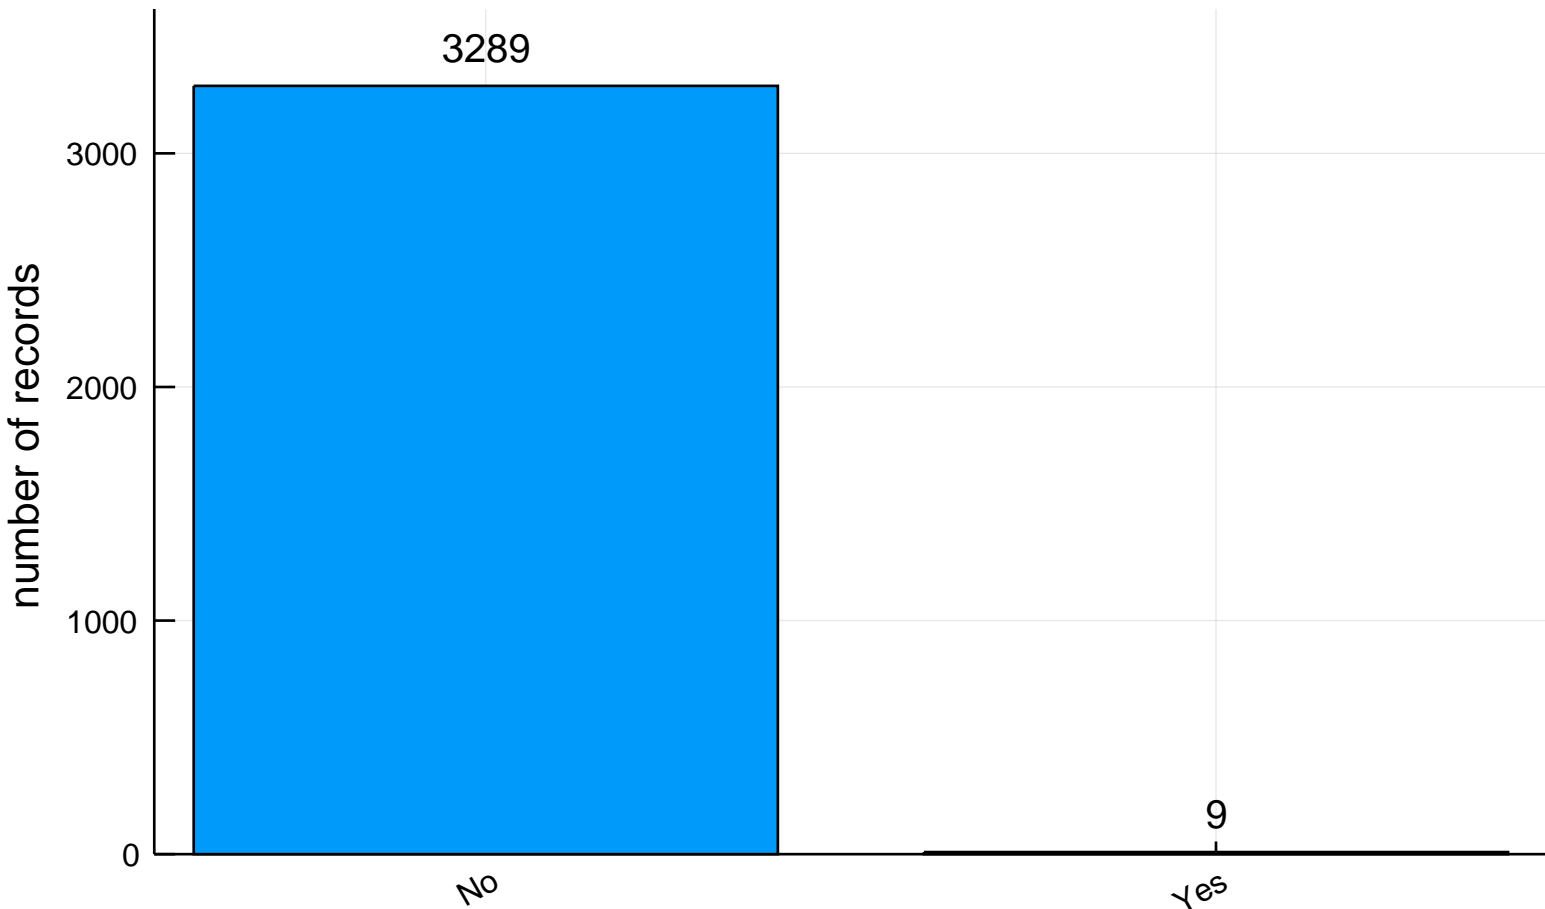

0 NAs

# Education Level (per row)

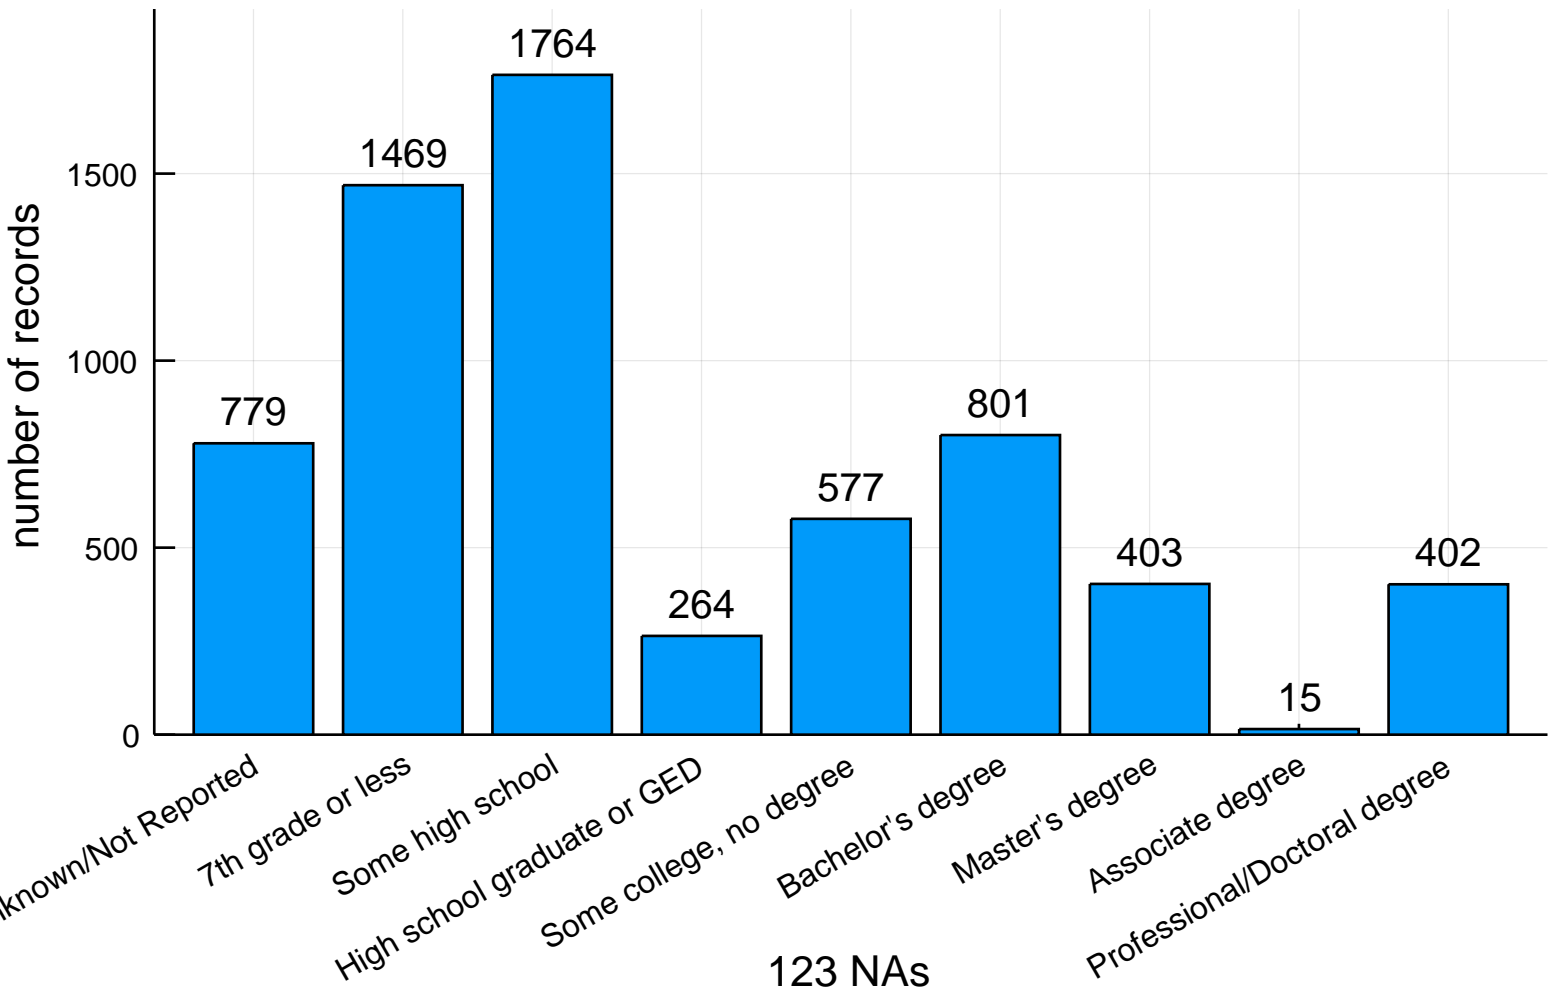

# Eggs (per row)

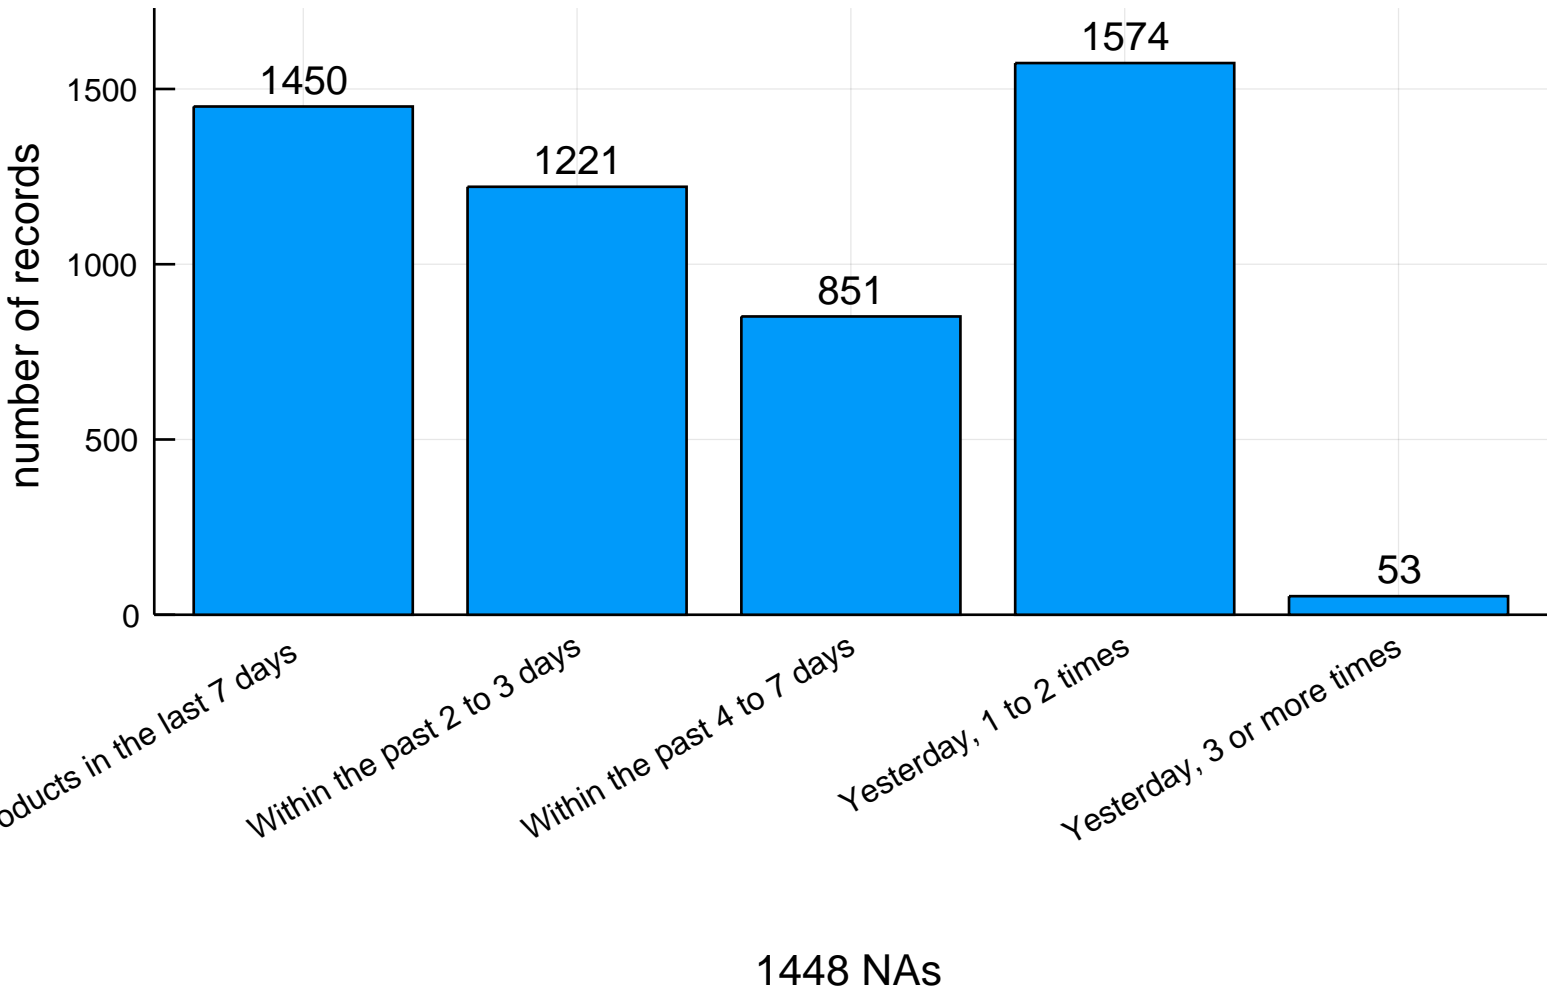

# Electric toothbrush (per Participant\_ID)

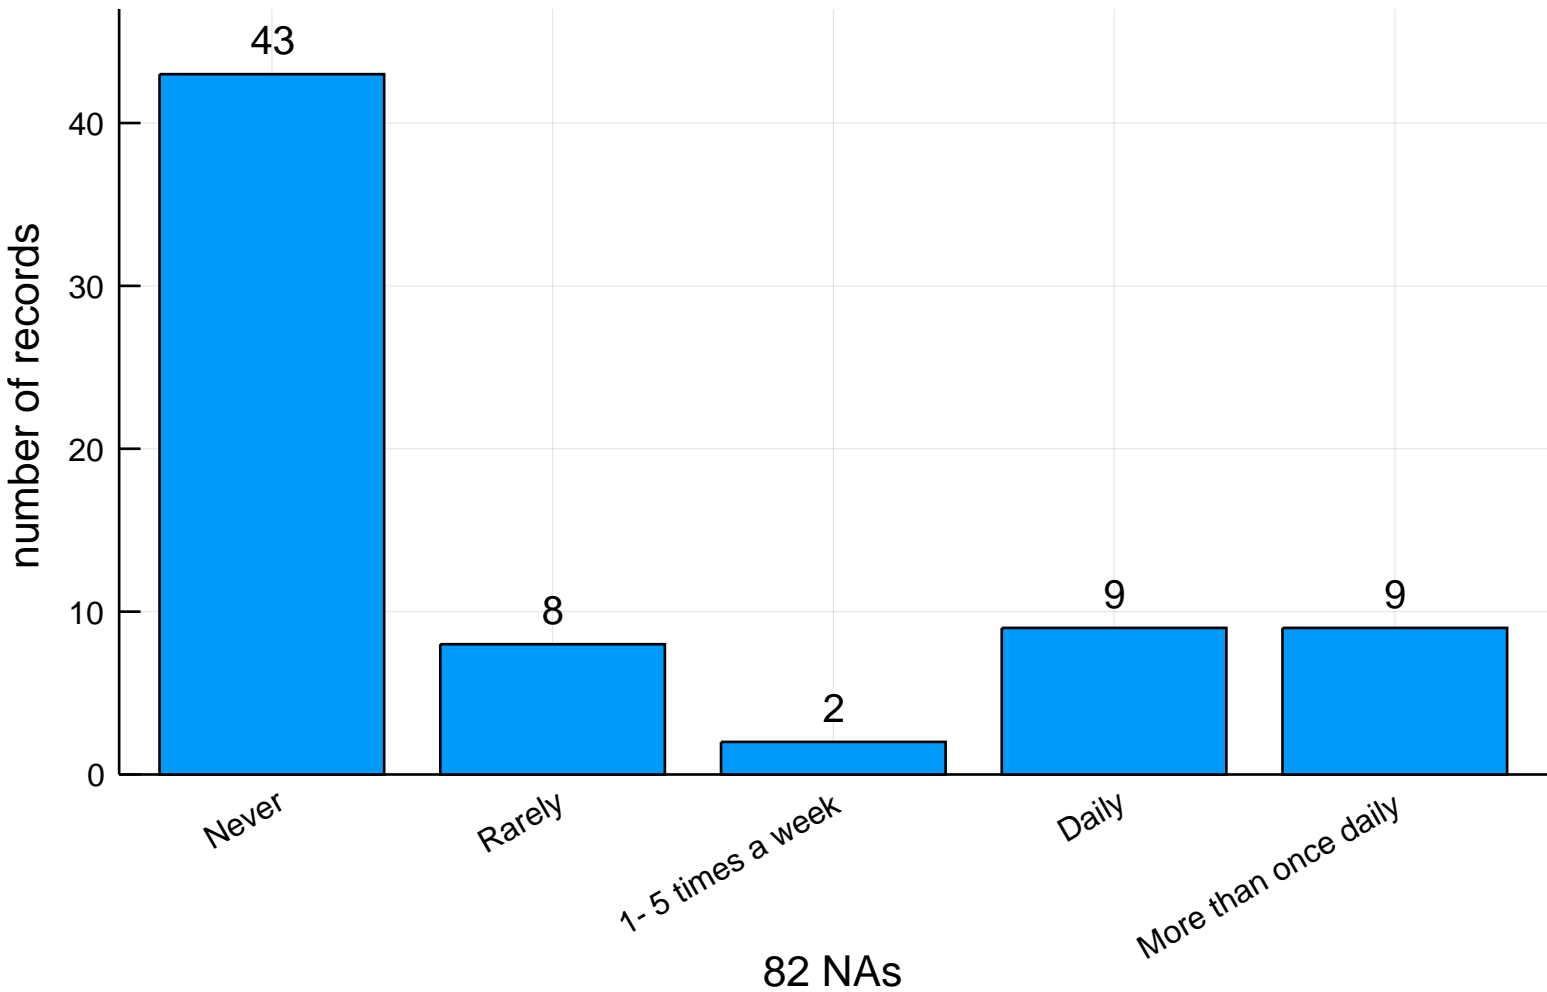

# Entocort Budesonide (per site\_sub\_coll)

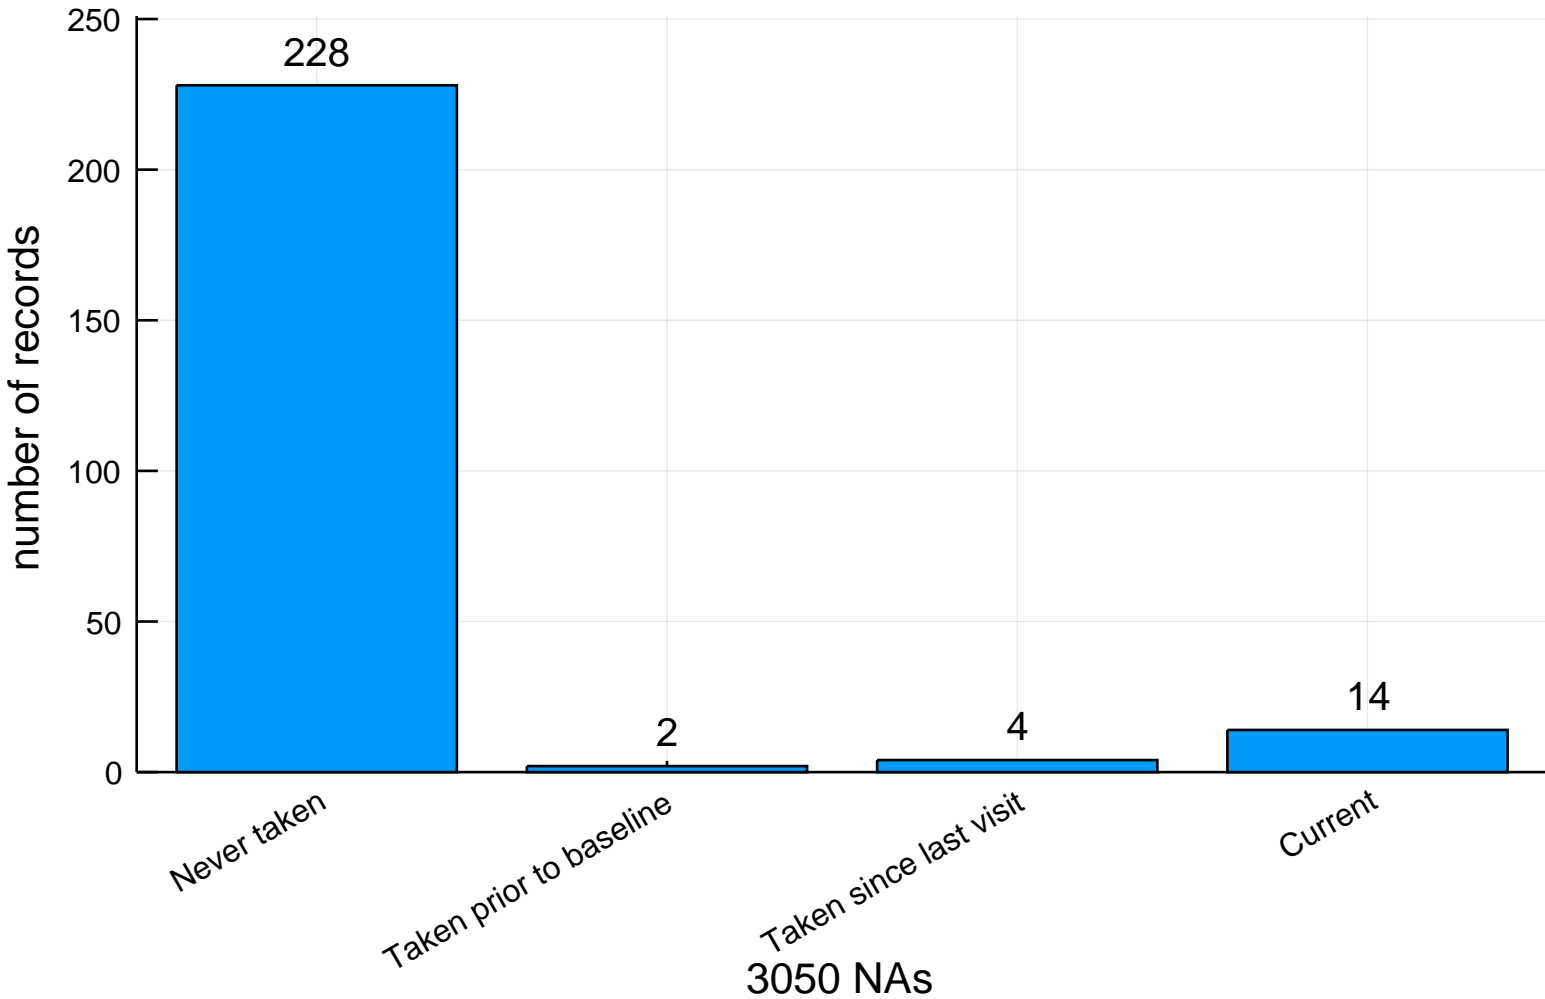



# Erythema nodosum (per site\_sub\_coll)

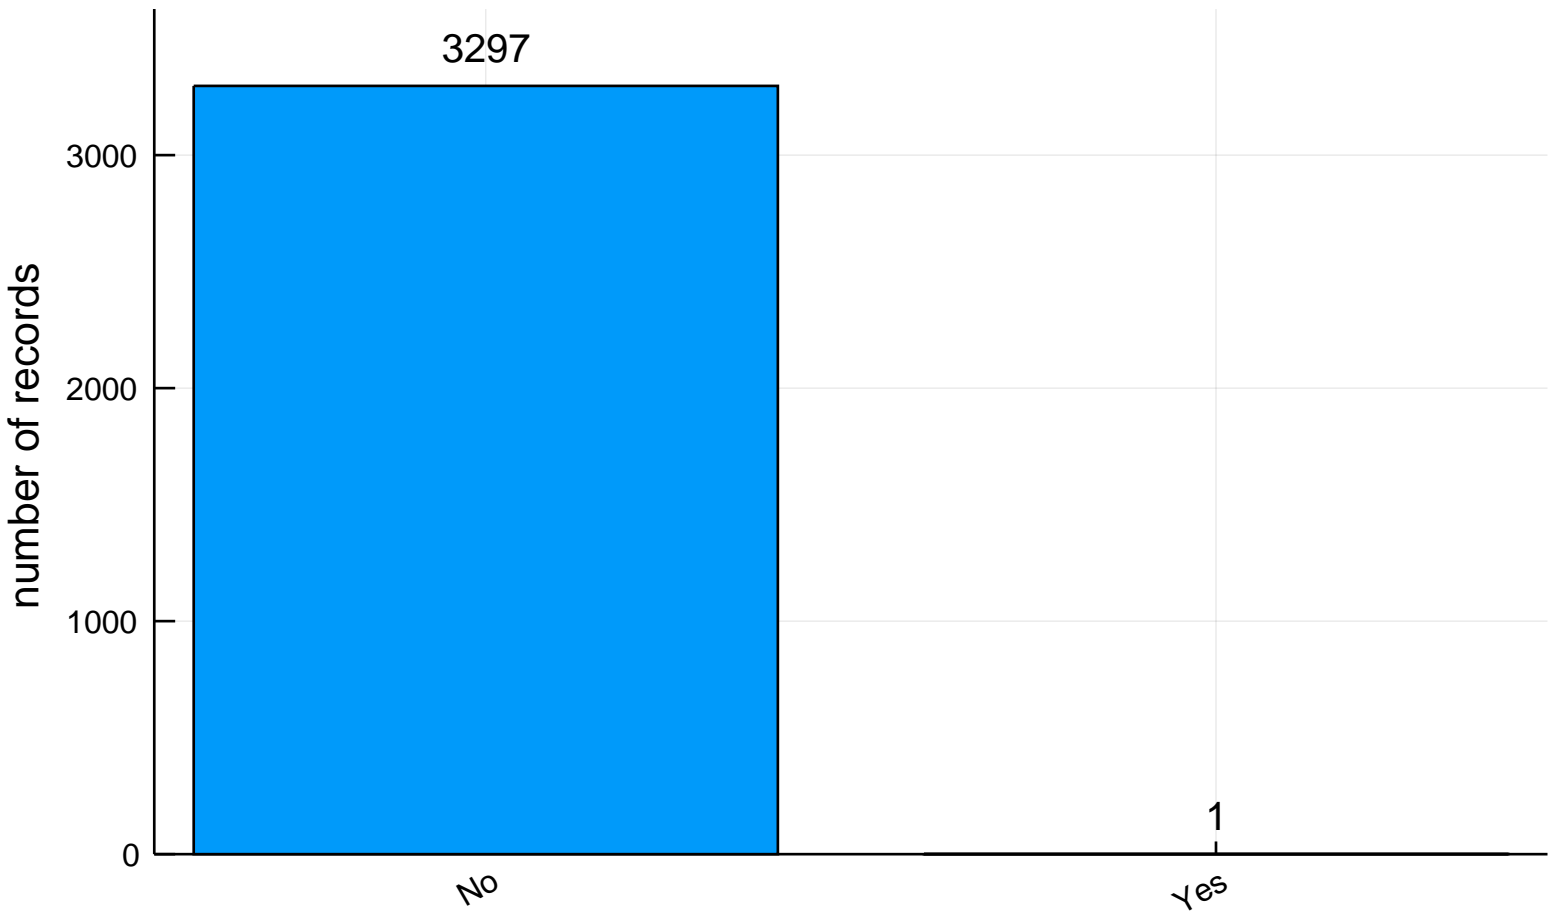

0 NAs

# Erythema nodosum 1 (per Participant\_ID)

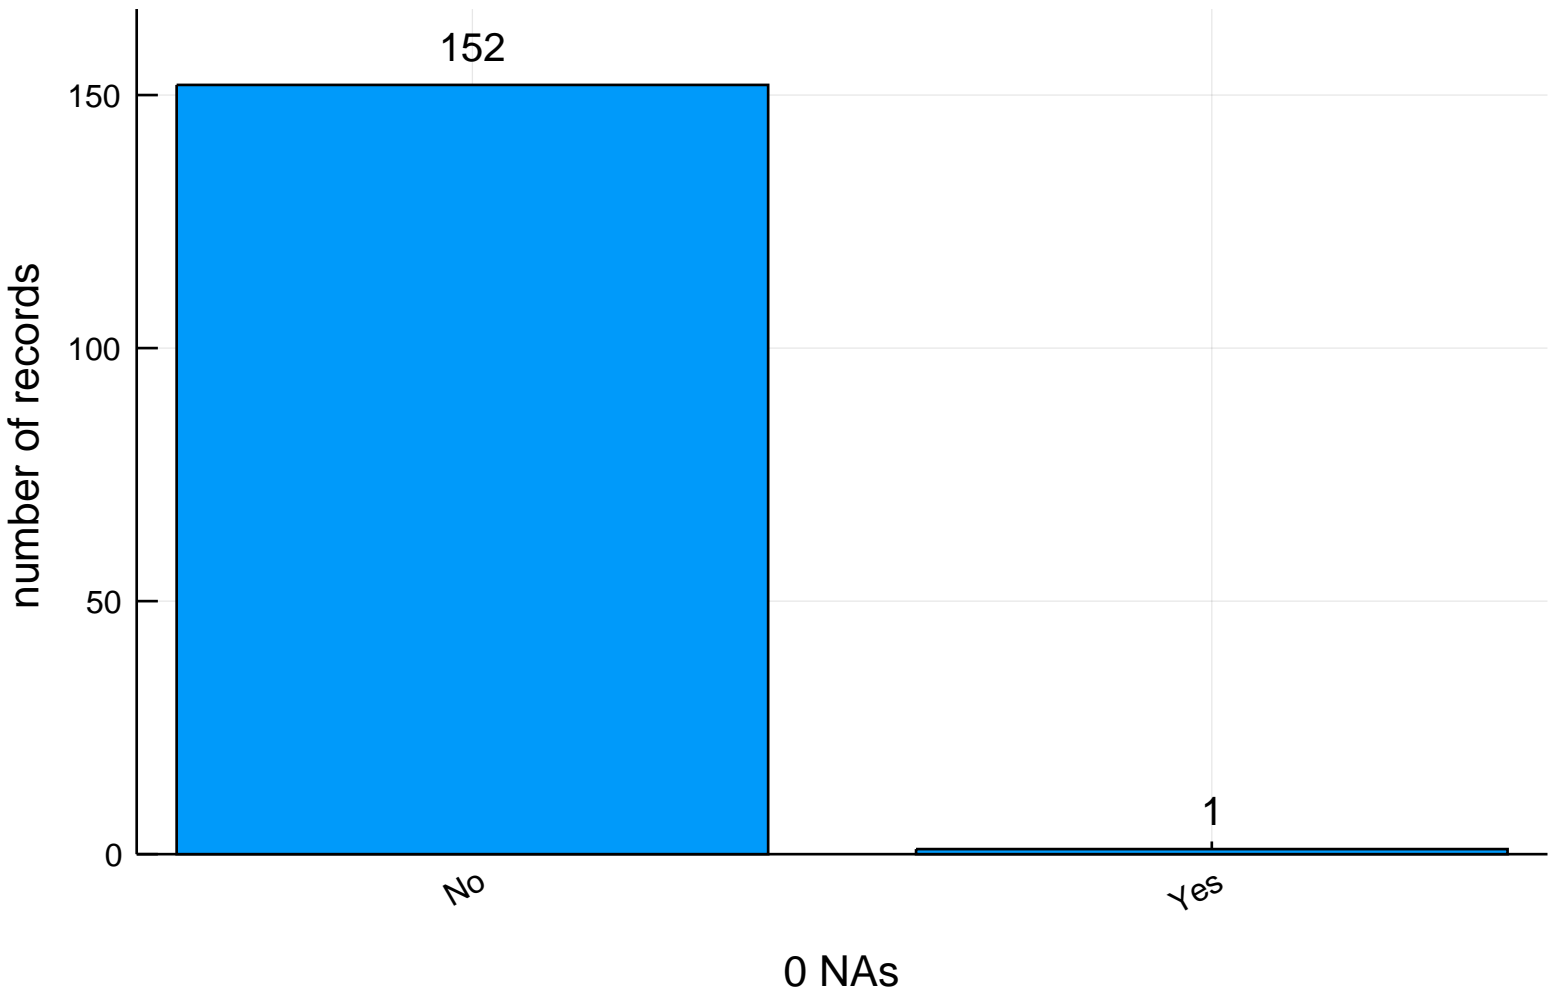

# ESR mm hr (per site\_sub\_coll)

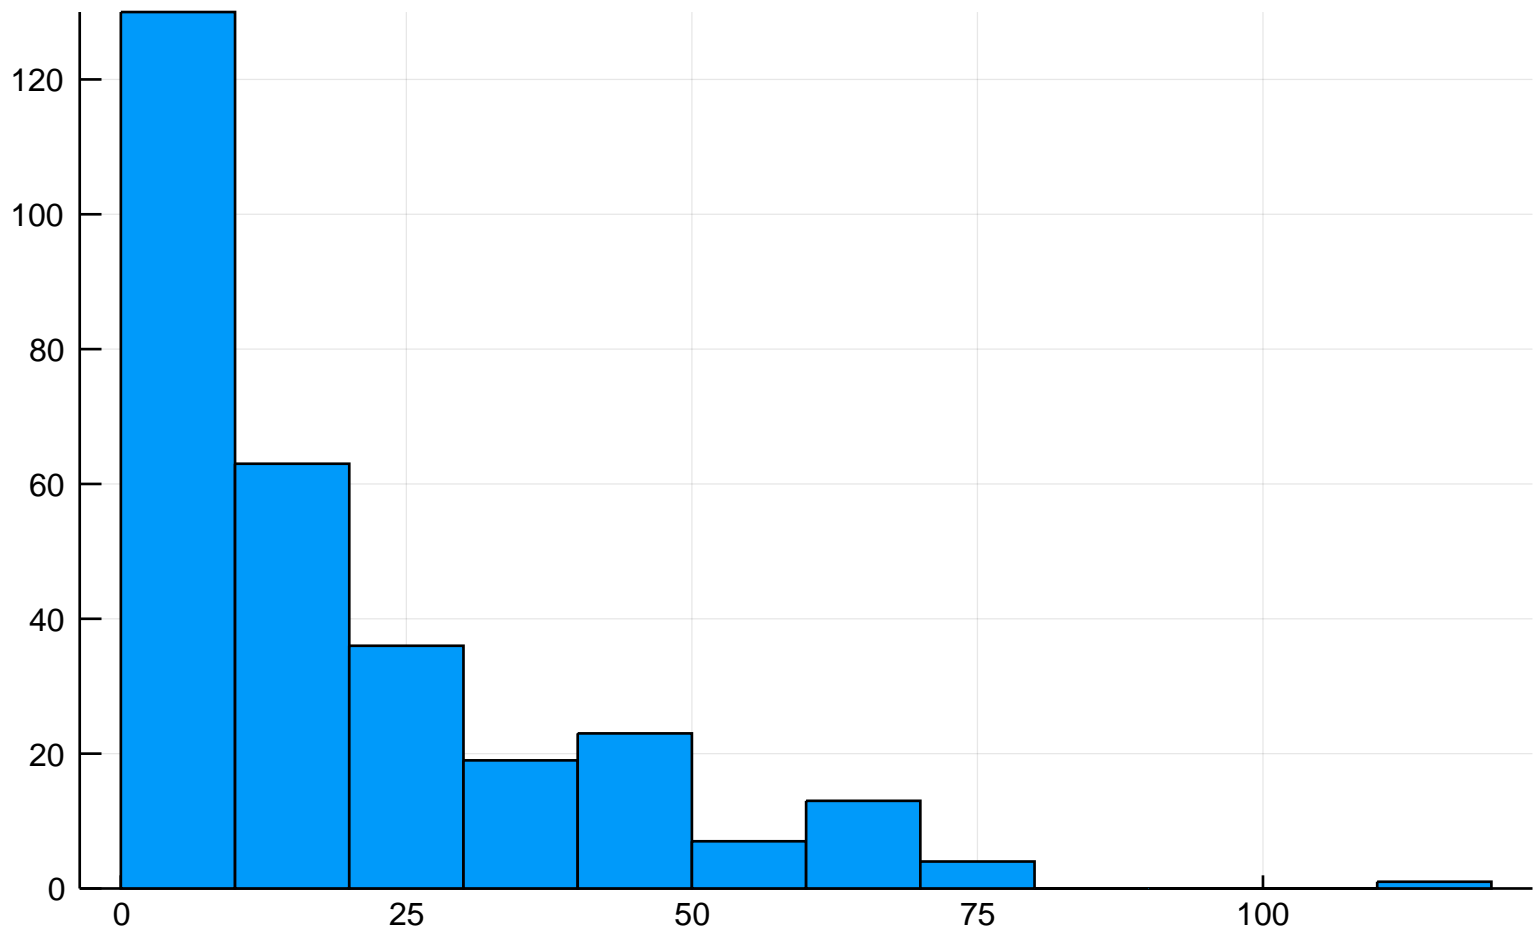

Mean: 19.22, stdev: 18.66

# Extent E 1 (per Participant\_ID)

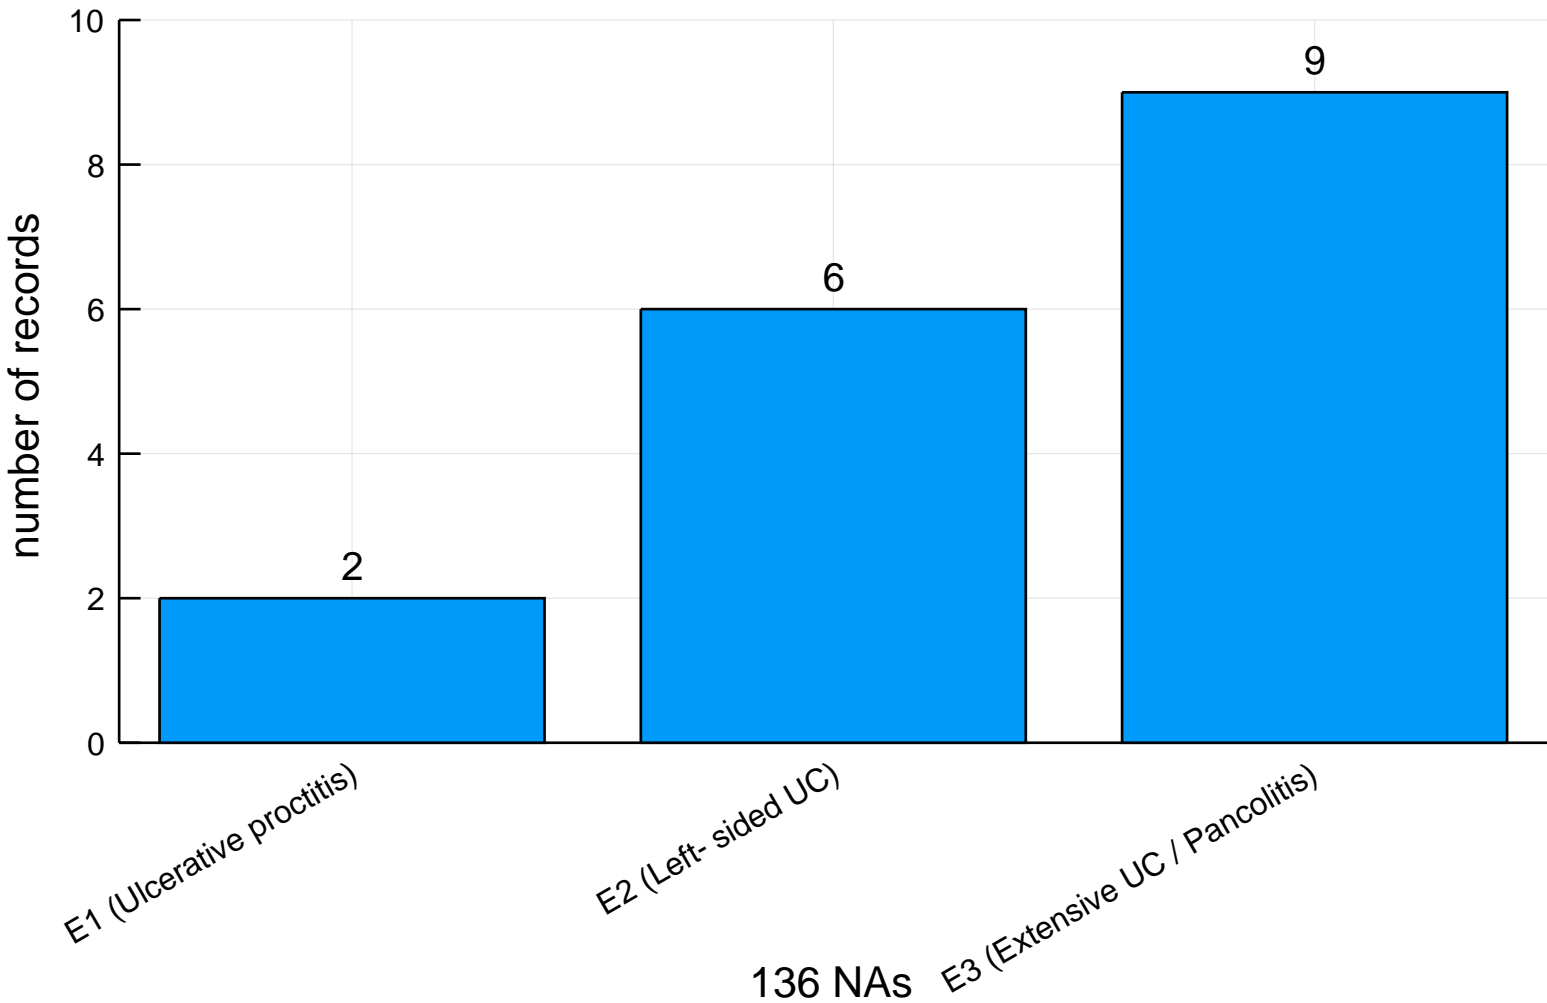

# Father (per Participant\_ID)

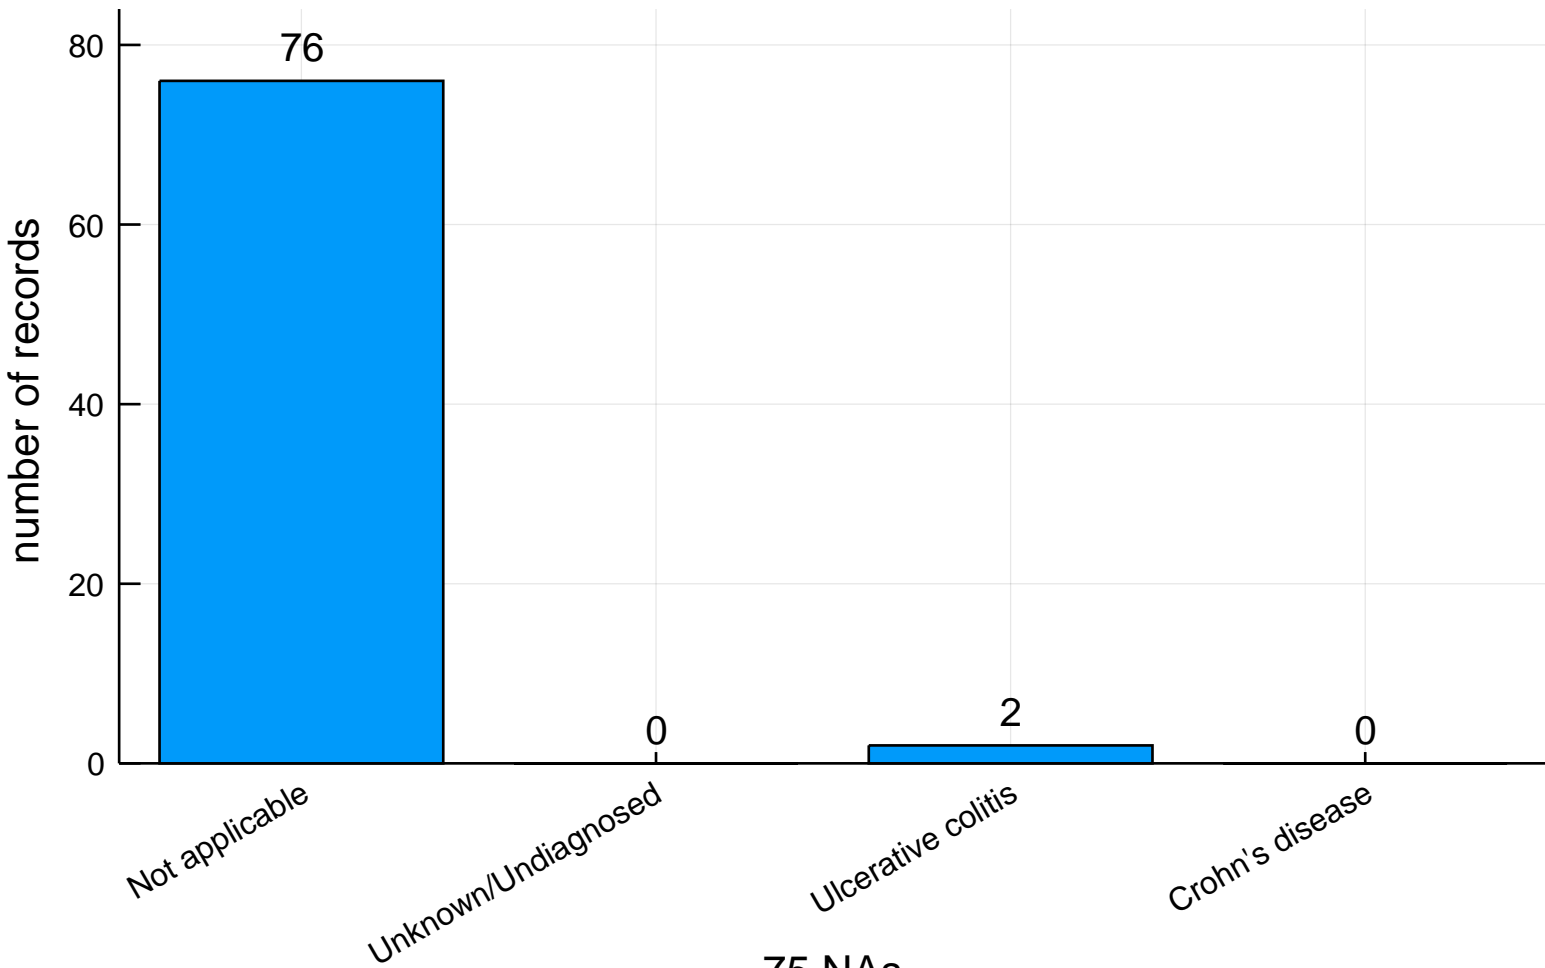

# fecalcal (per row)

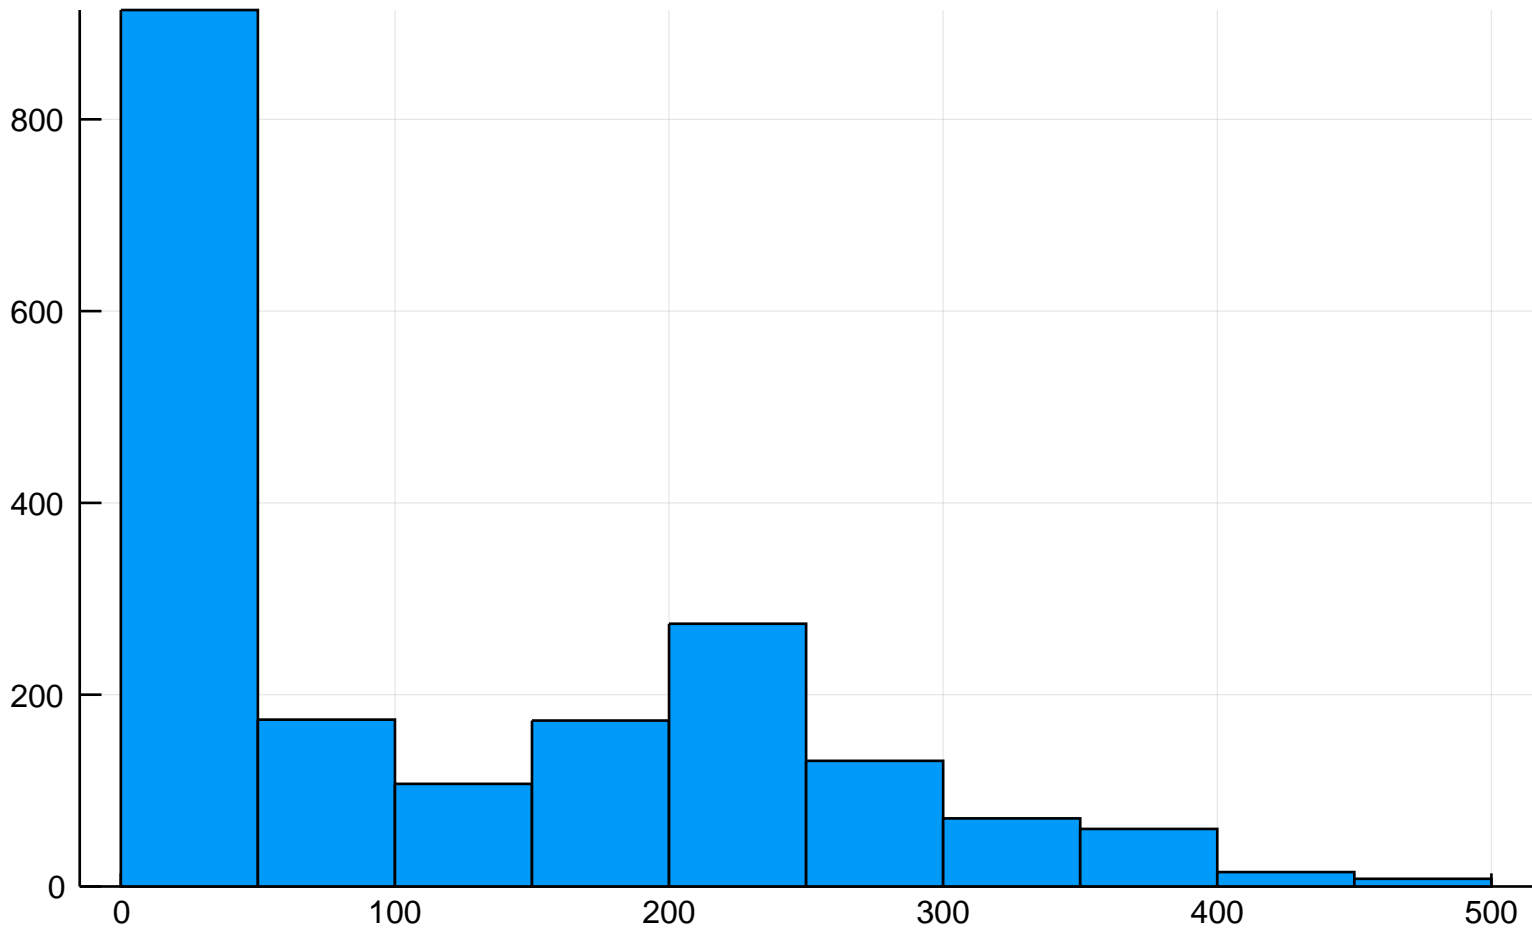

Mean: 118.23, stdev: 115.32

fecalcal ng ml (per site\_sub\_coll)

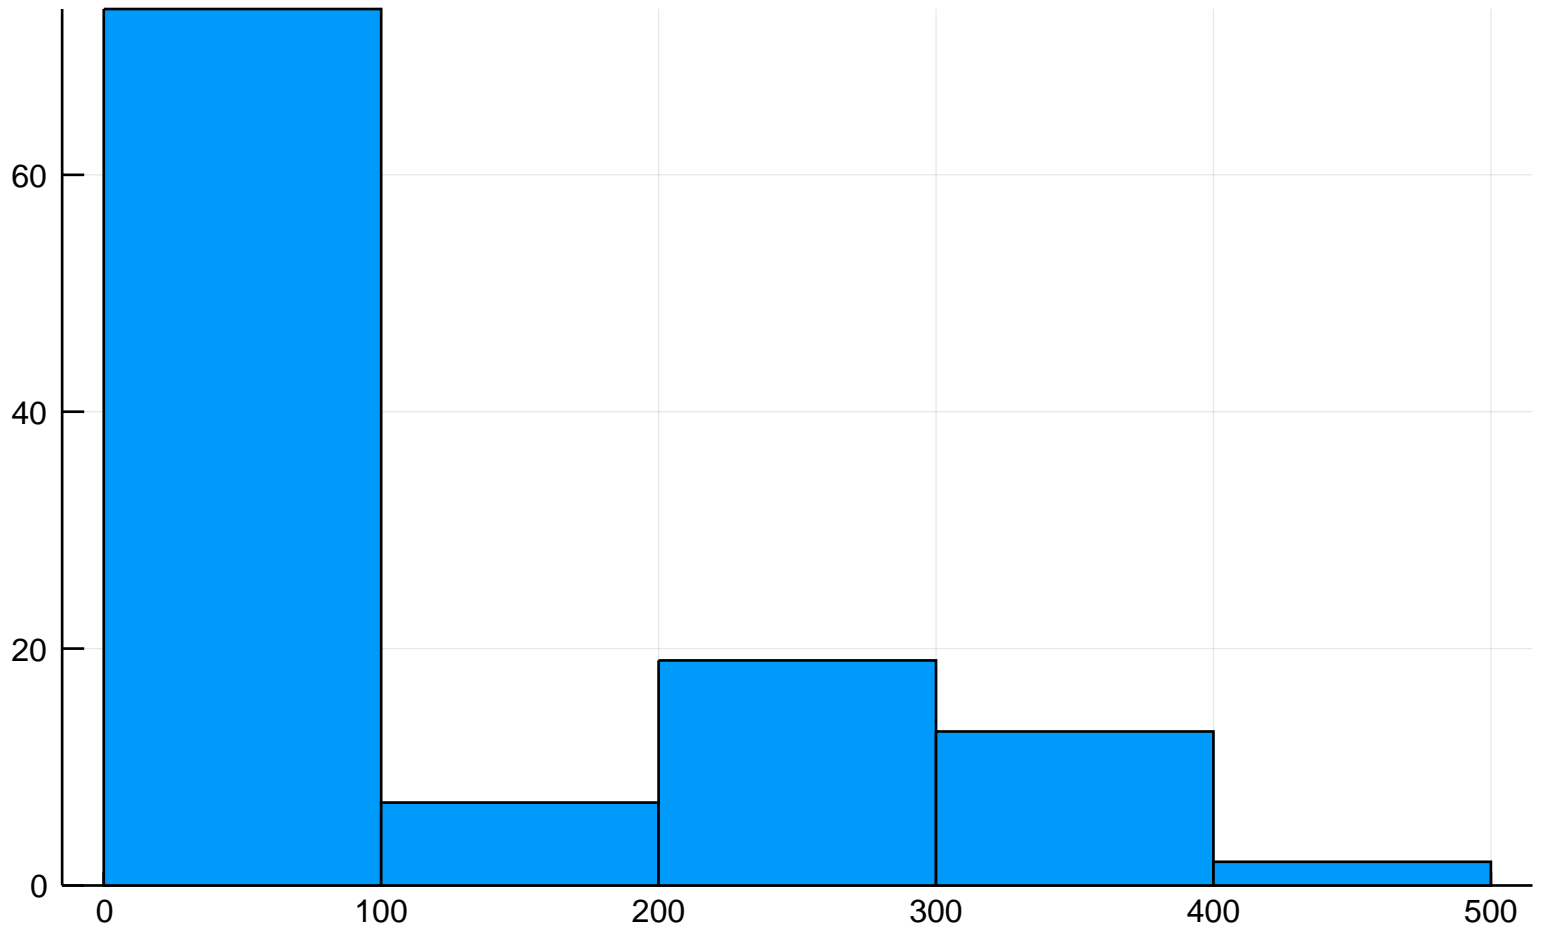

Mean: 114.97, stdev: 132.58

# Female distant relative 1 (per Participant\_ID)

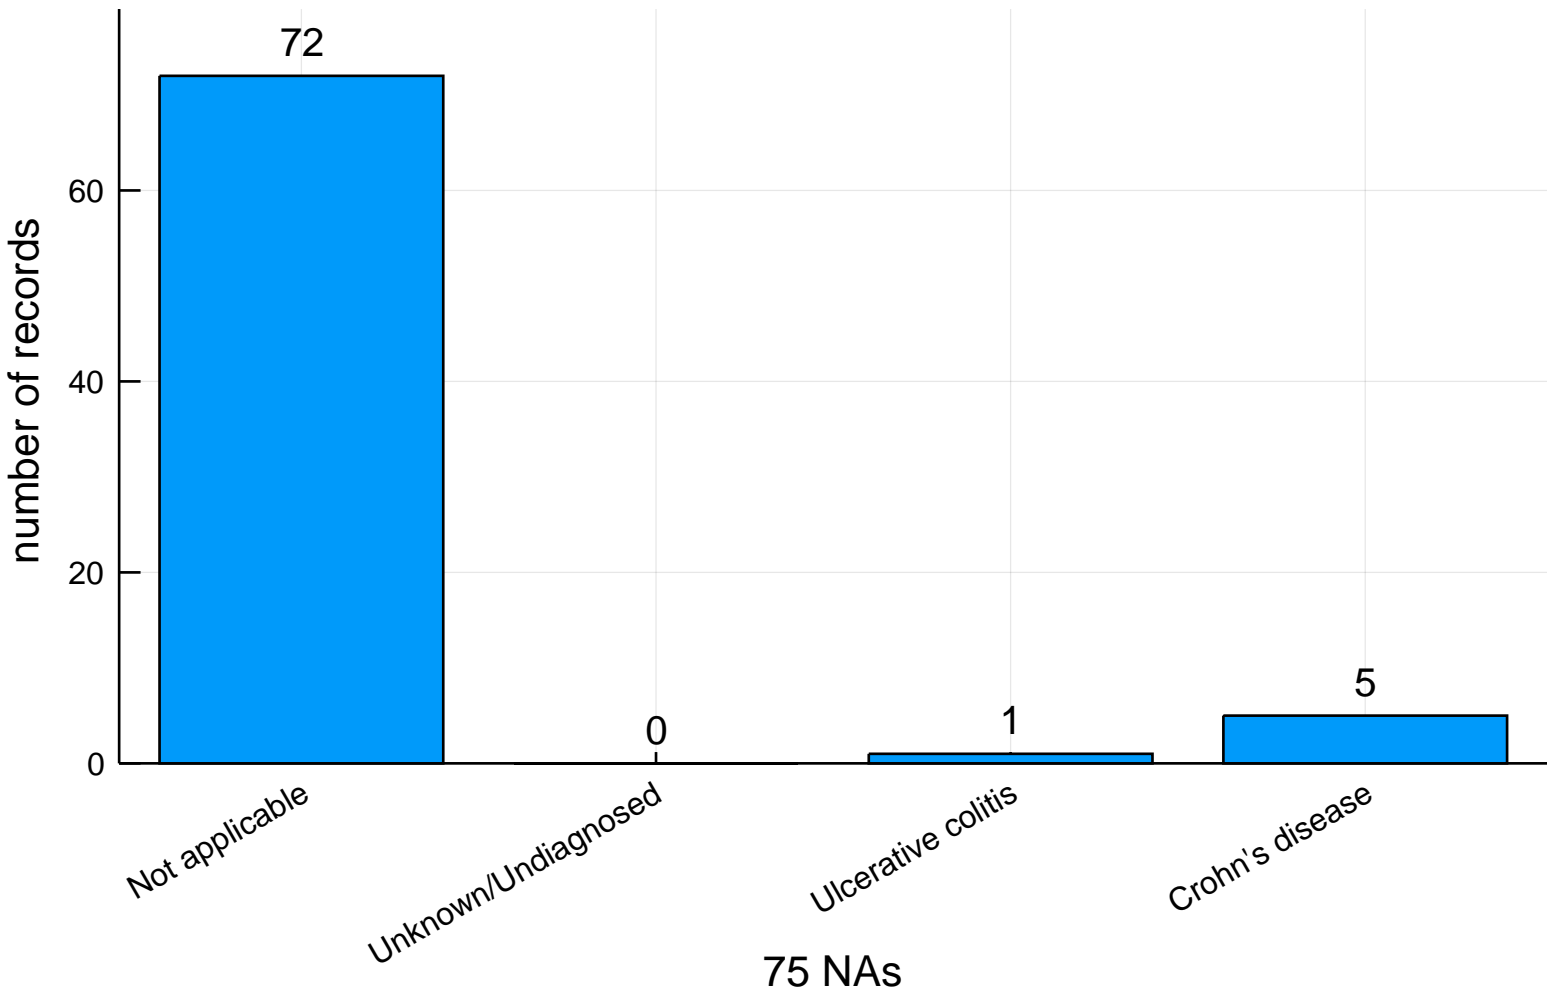



# Female grandparent 1 (per Participant\_ID)

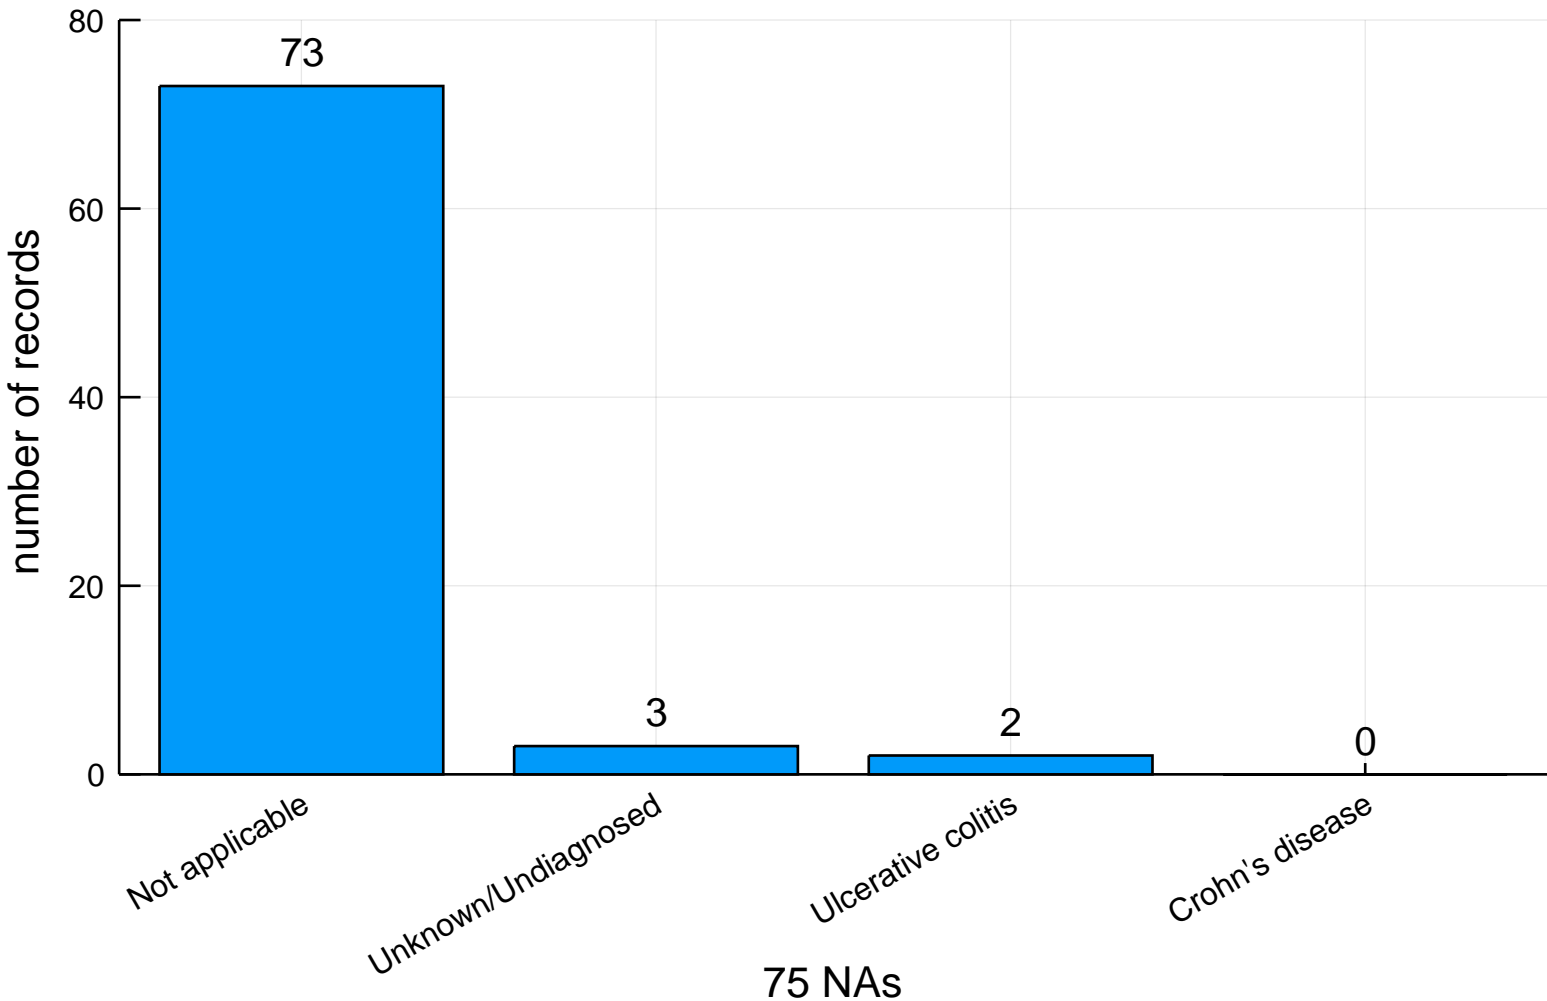

# Female grandparent 2 (per Participant\_ID)

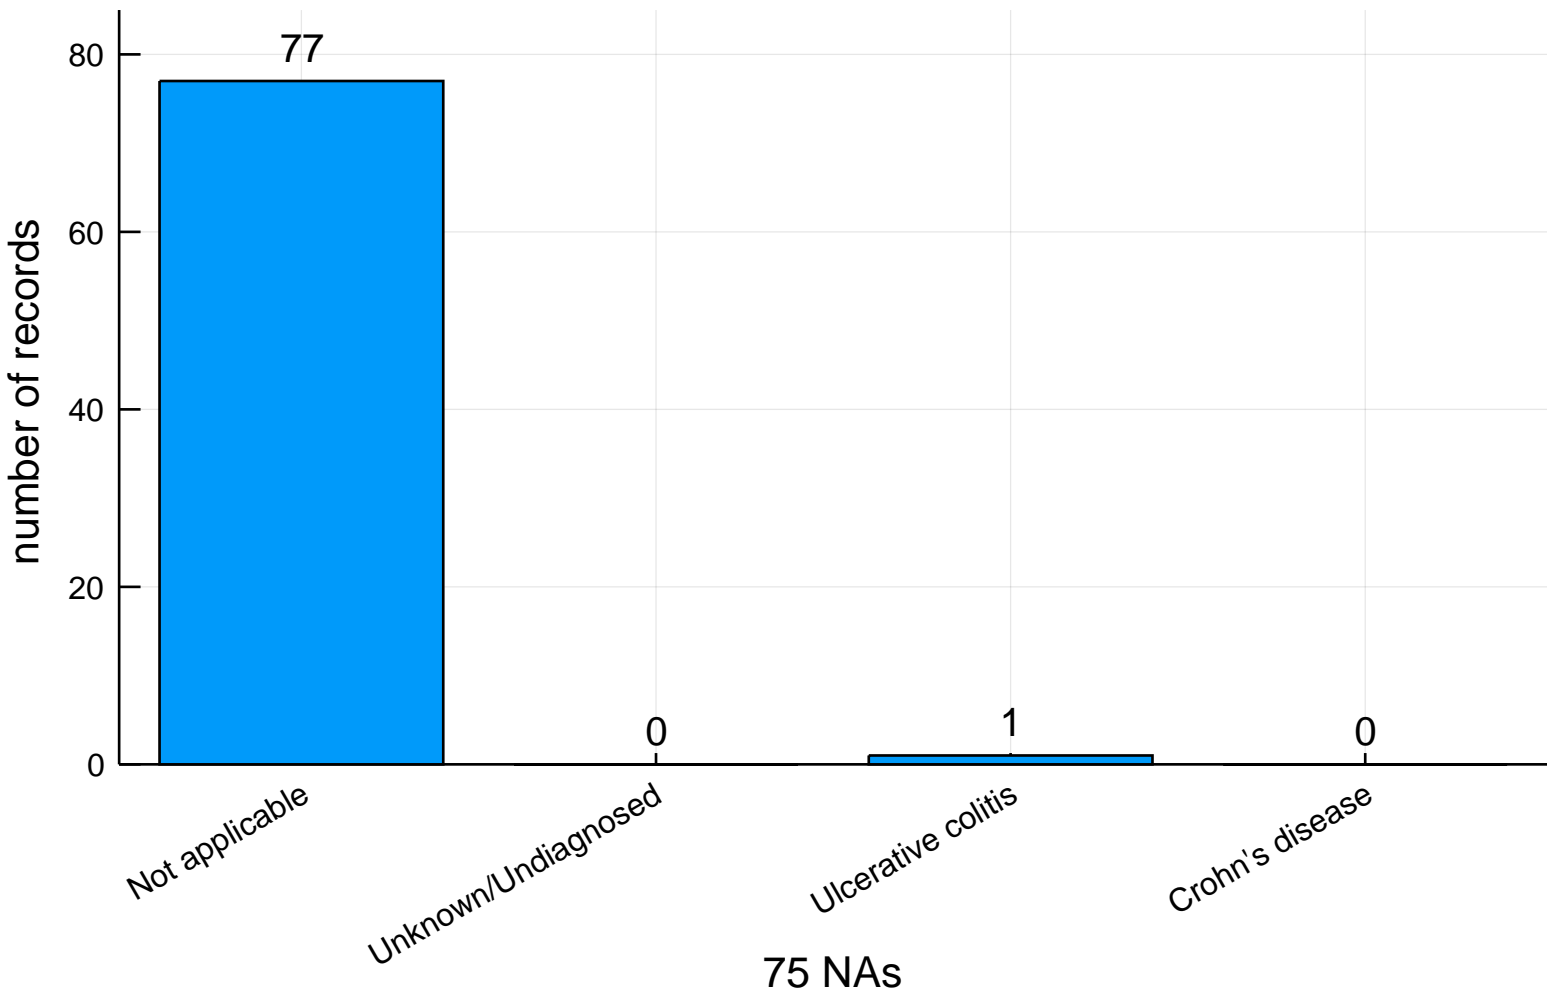

# Female sibling 1 (per Participant\_ID)

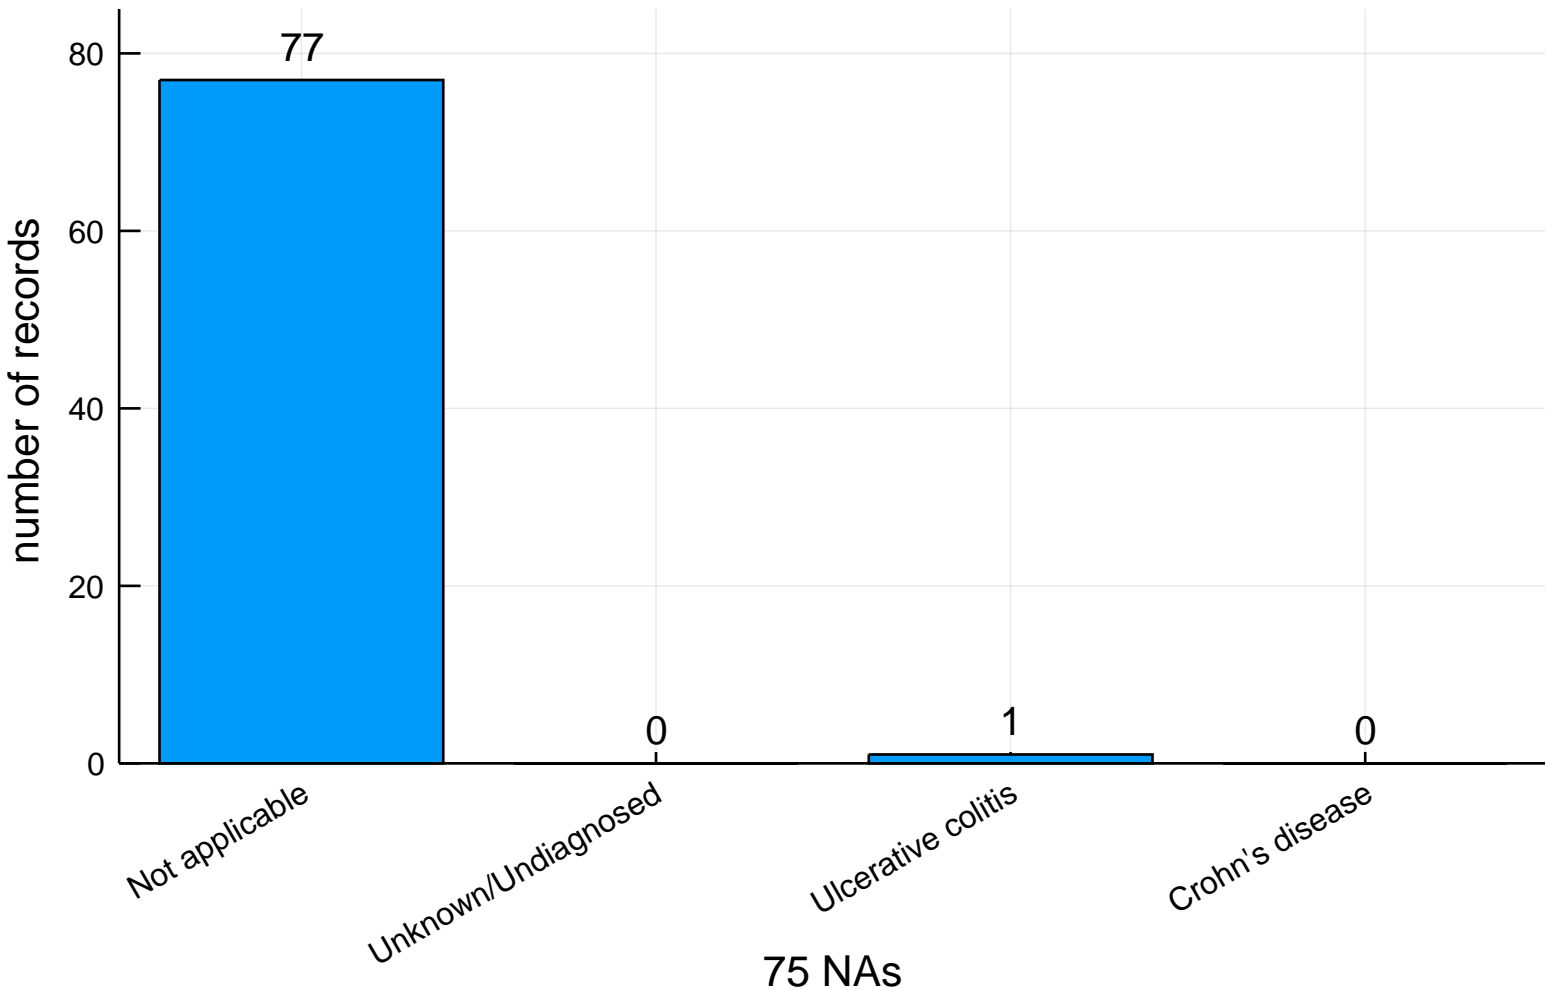

# filtered reads (per row)

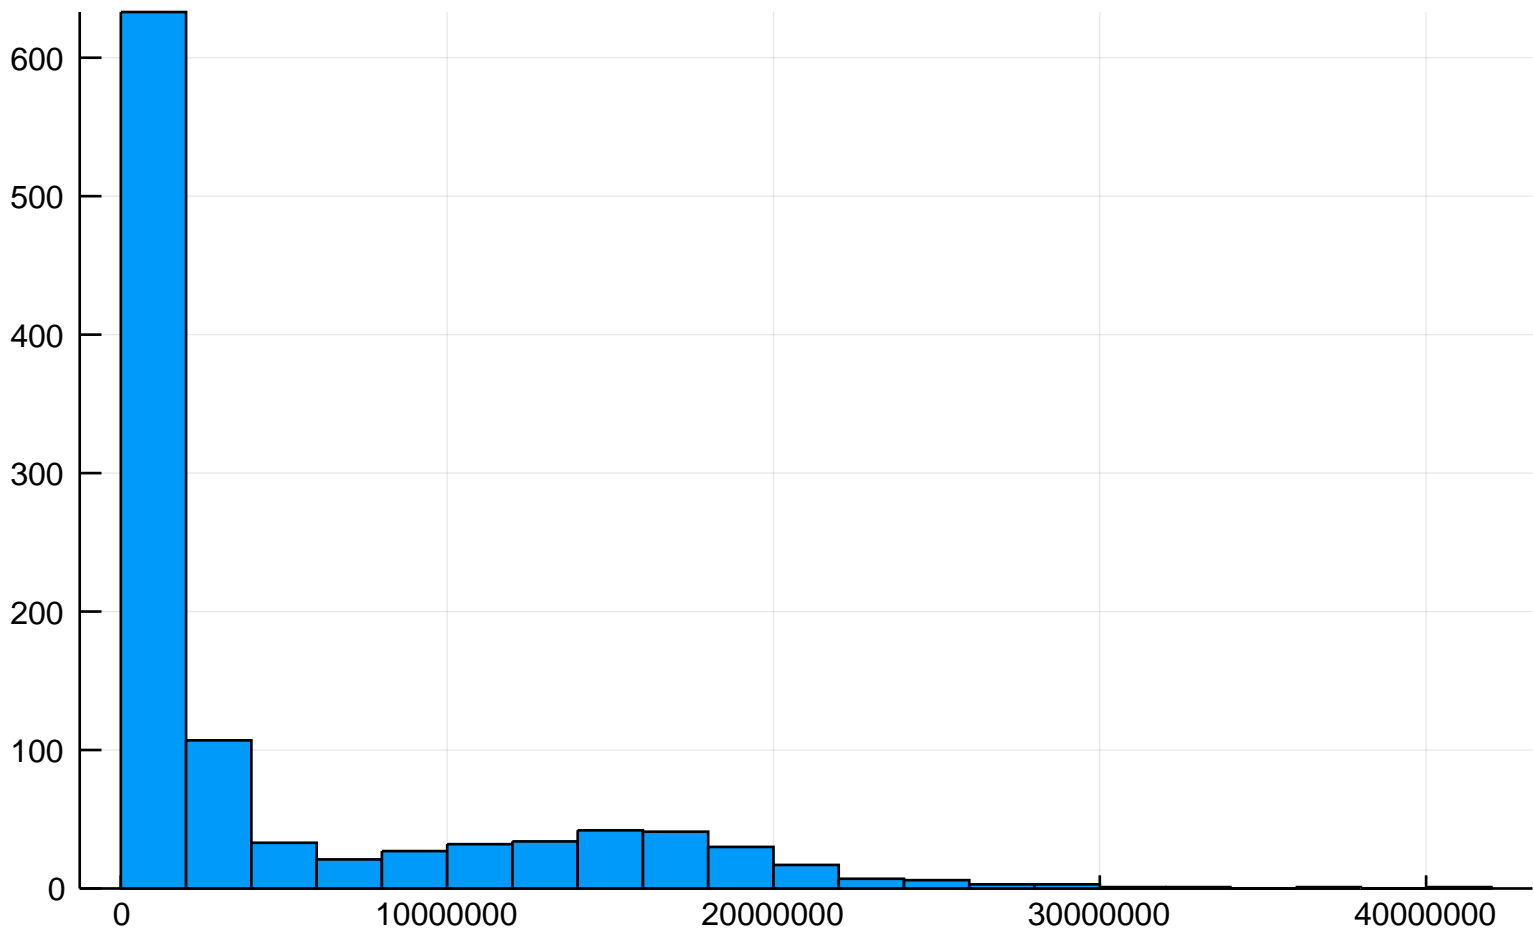

Mean: 4.75259221e6, stdev: 6.80825384e6

# Fish fish nuggets breaded fish fish cake (per row)

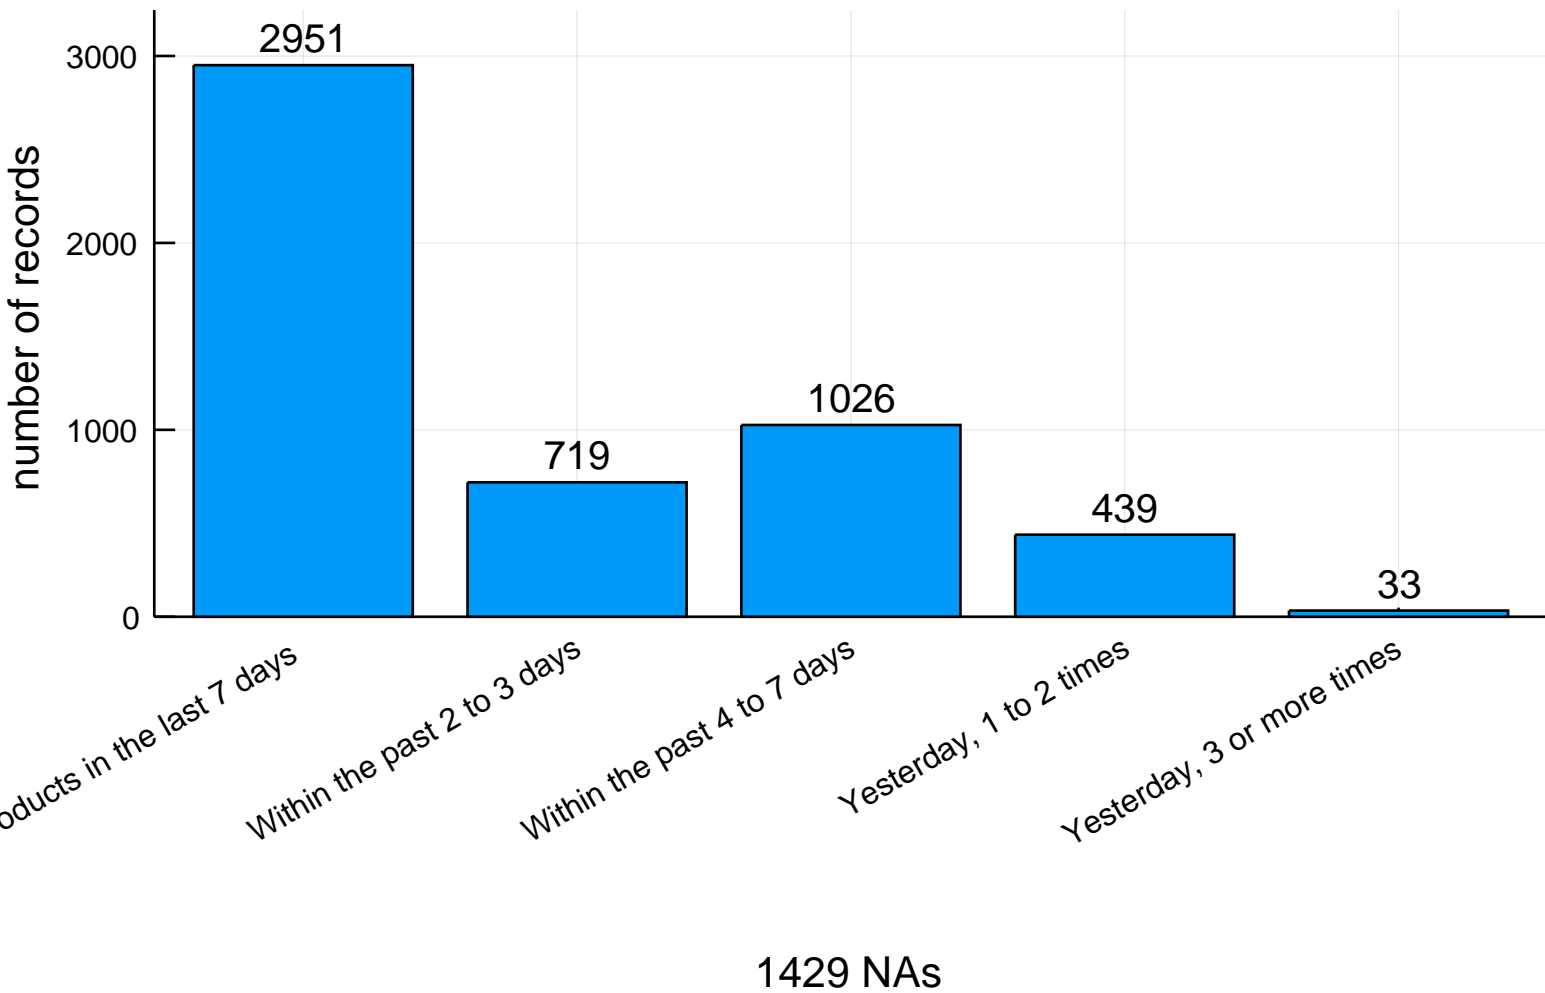

# Flagyl Metronidazole (per site\_sub\_coll)

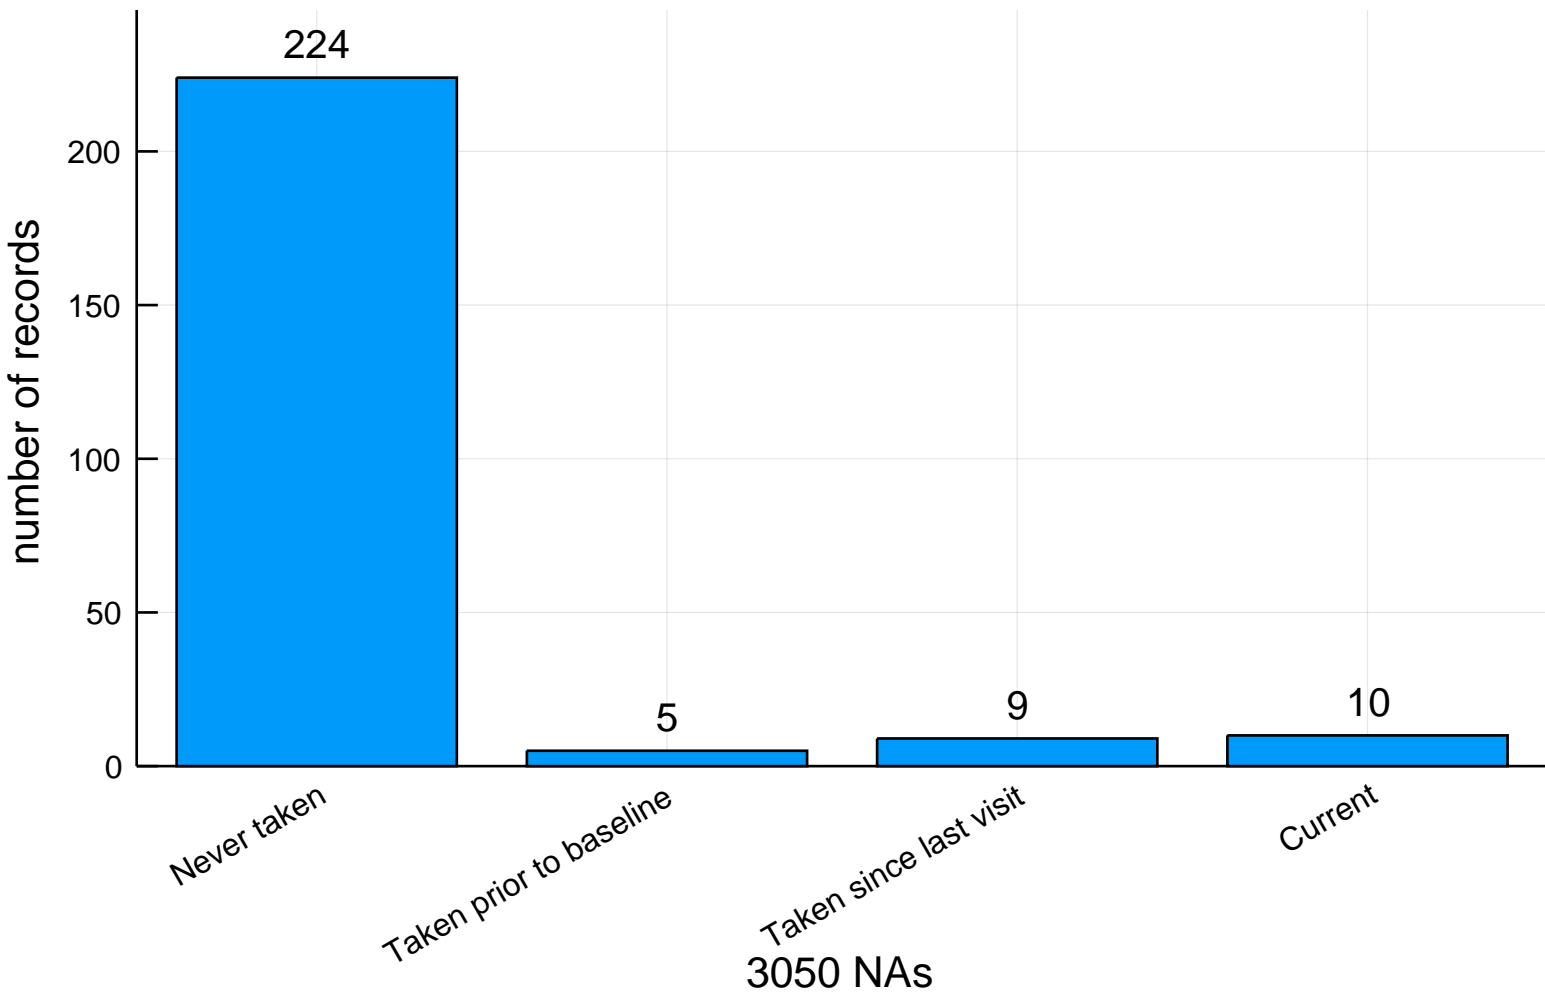

# Floss (per Participant\_ID)

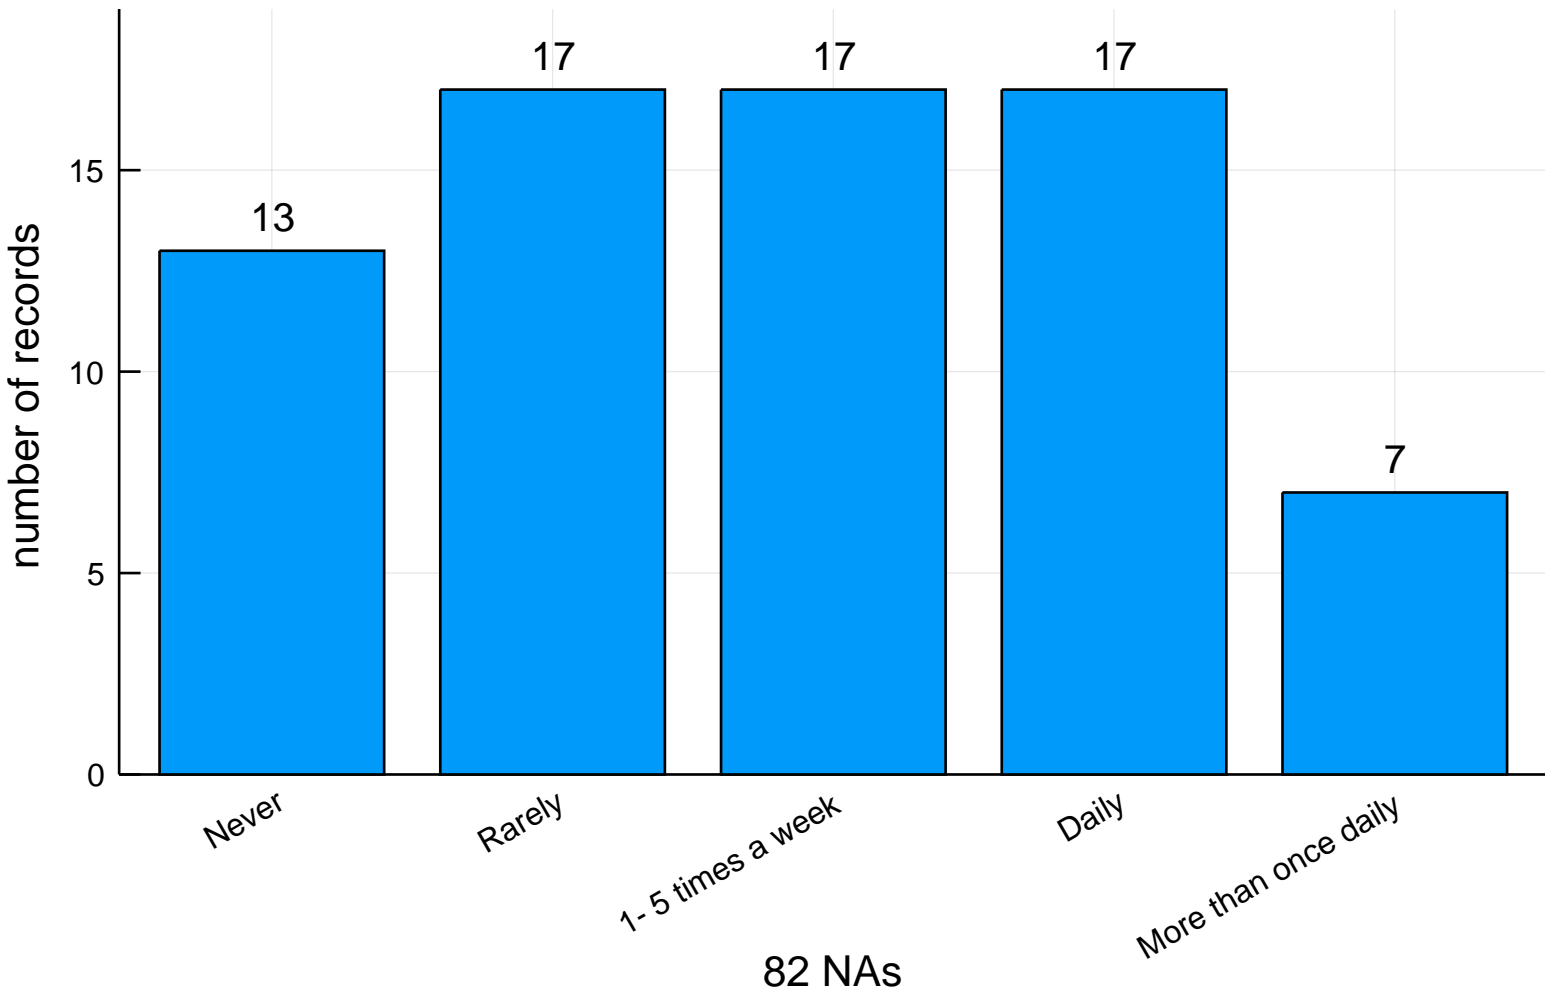

For months 3 6 and 9 ONLY Has the subject (per site\_sub\_co

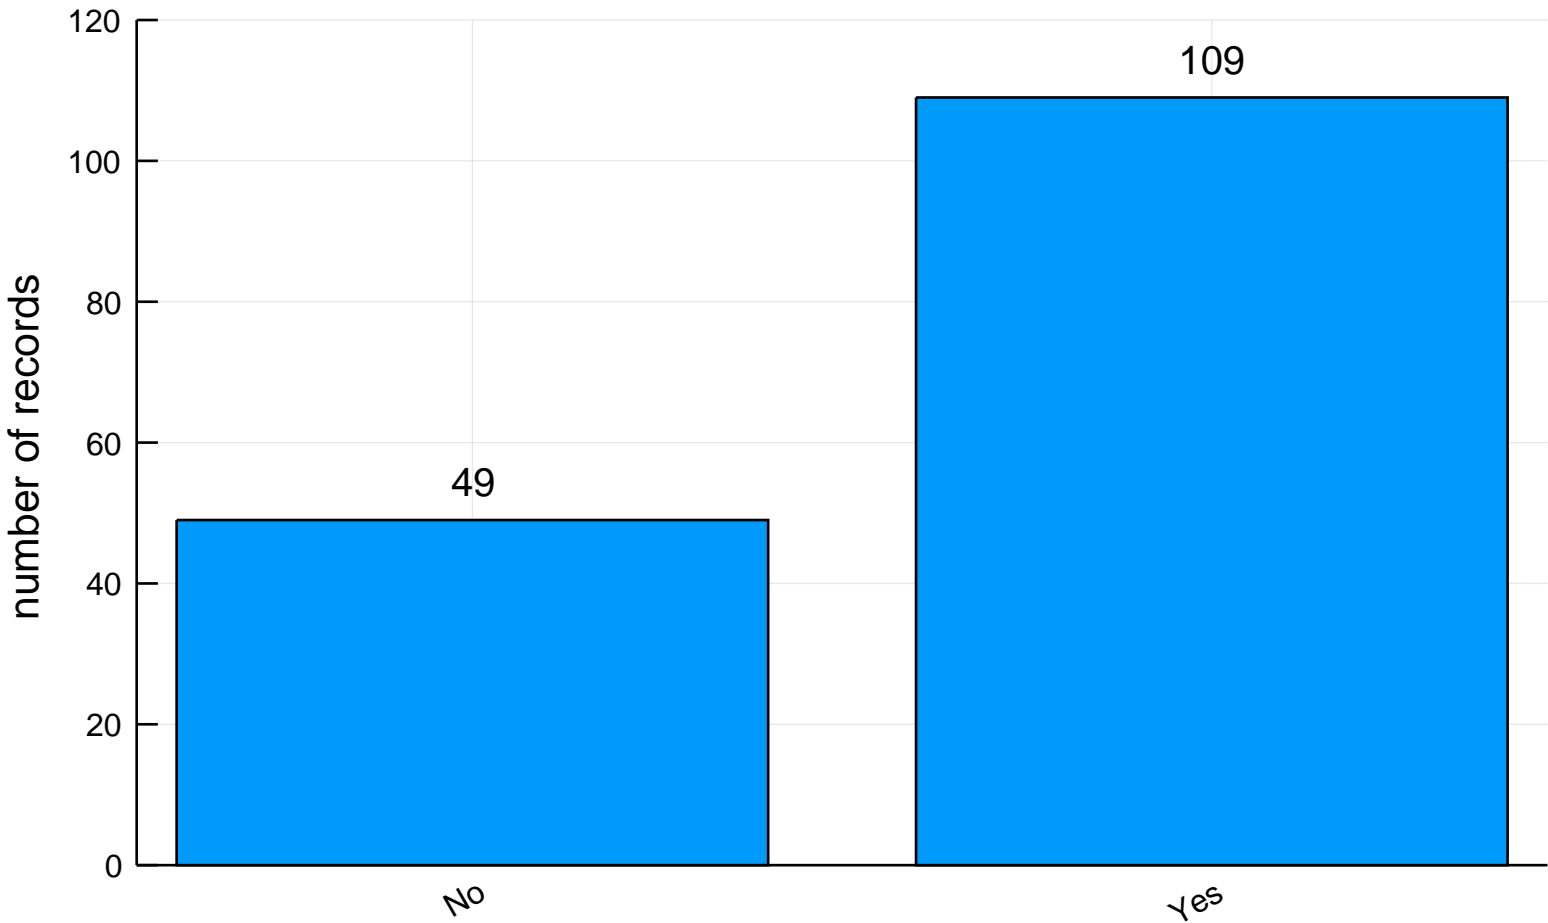

3140 NAs



For UC and CD has the disease classifica (per site\_sub\_coll)

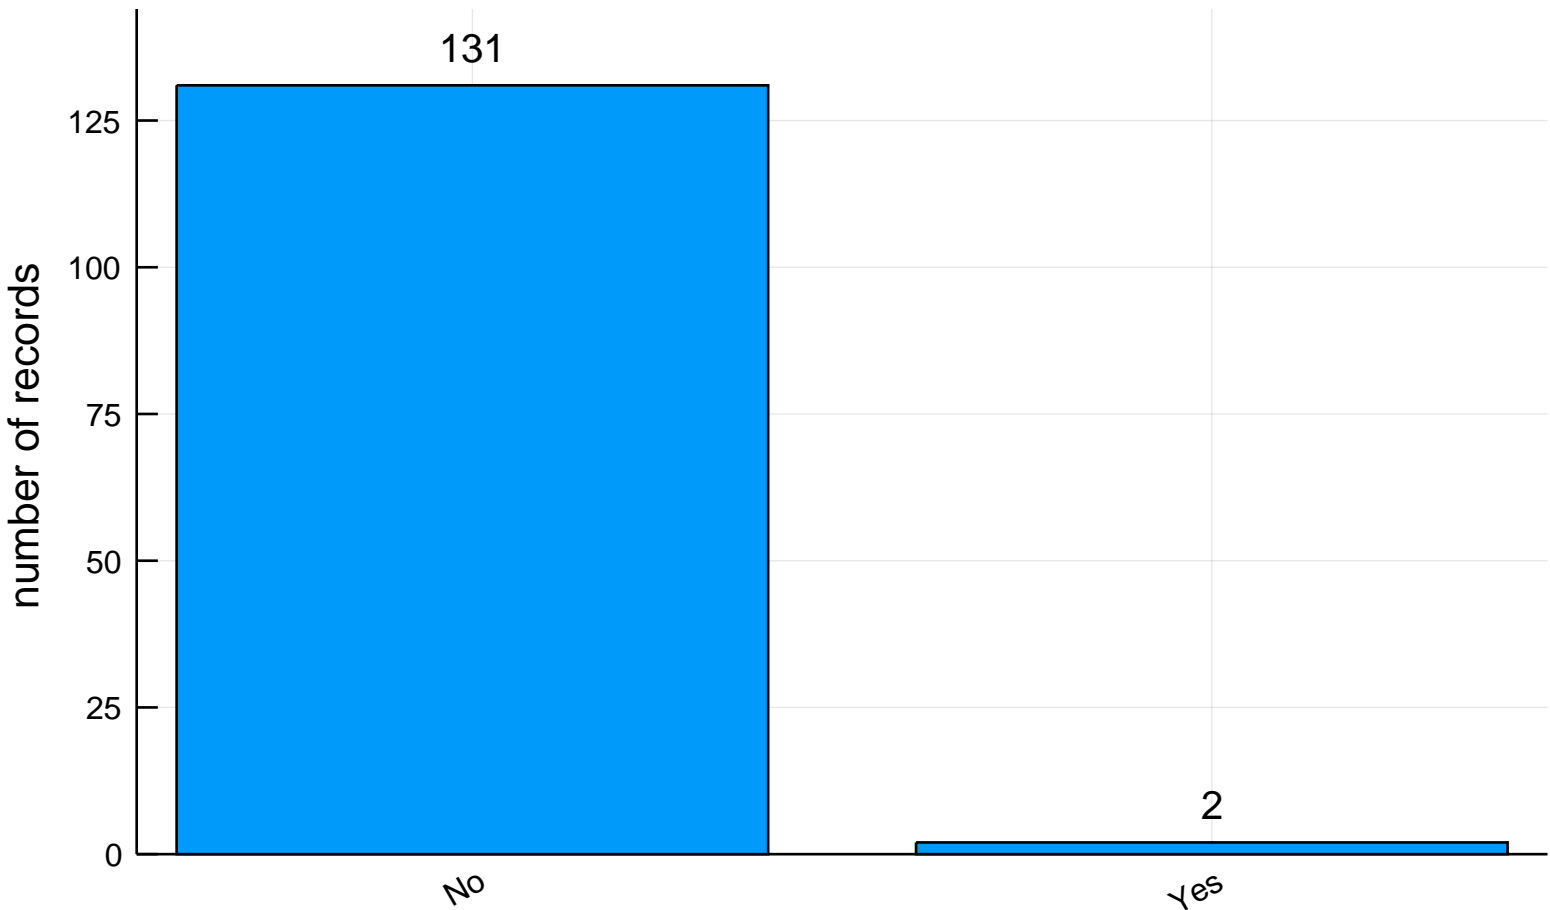

3165 NAs

# FOS (per site\_sub\_coll)

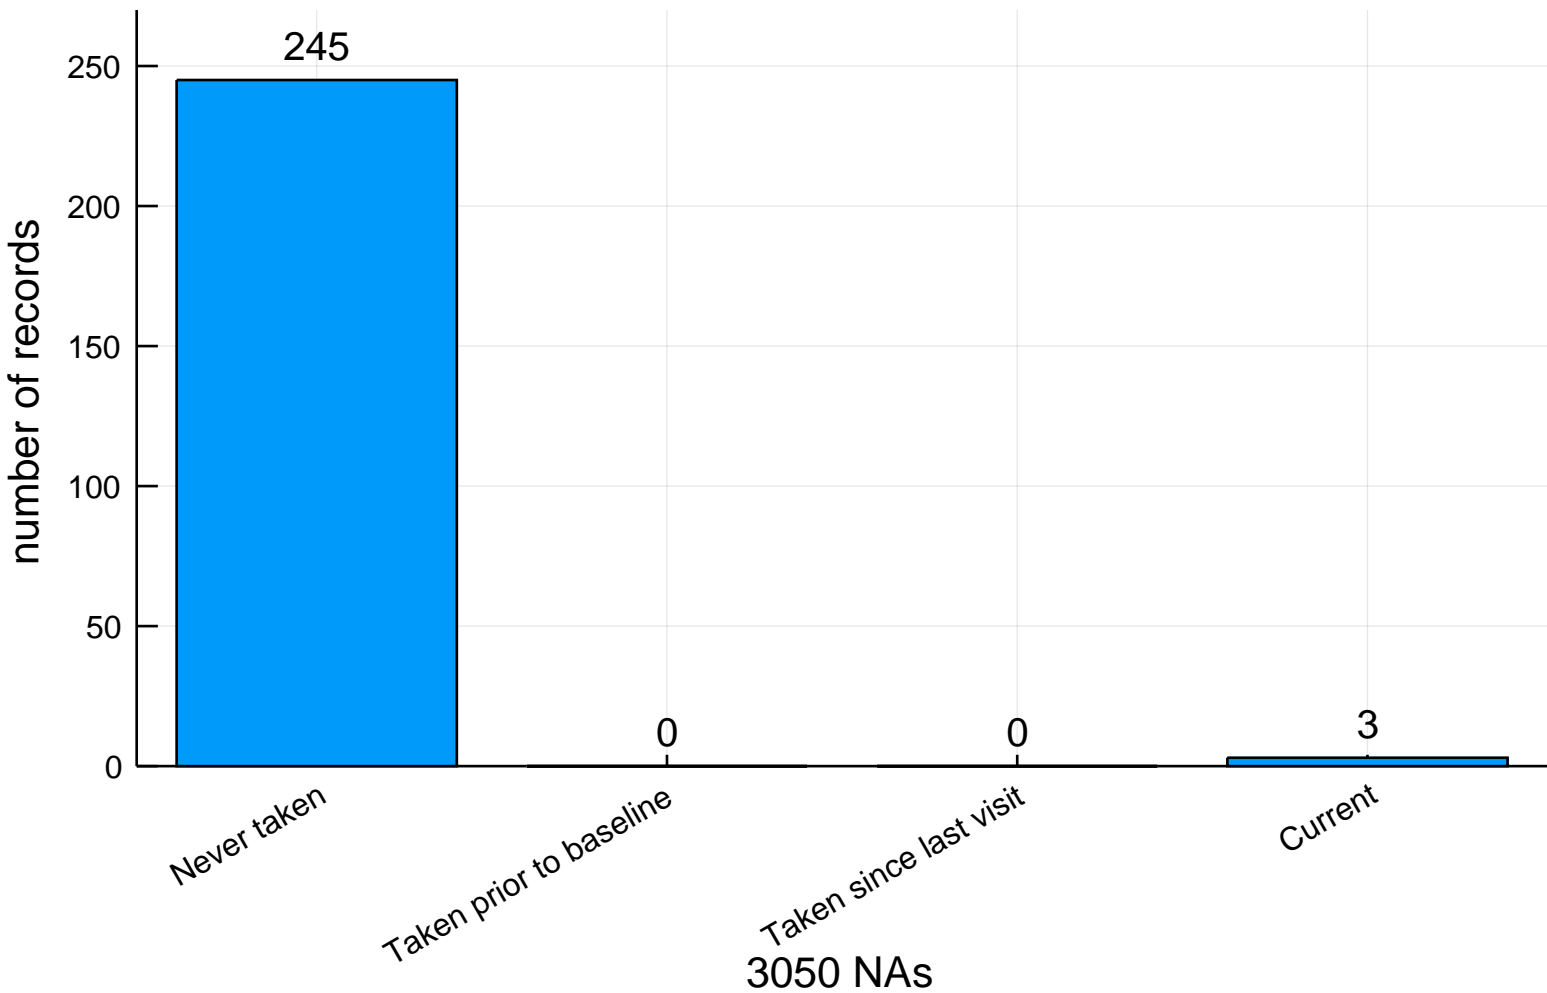

# frac human reads (per row)

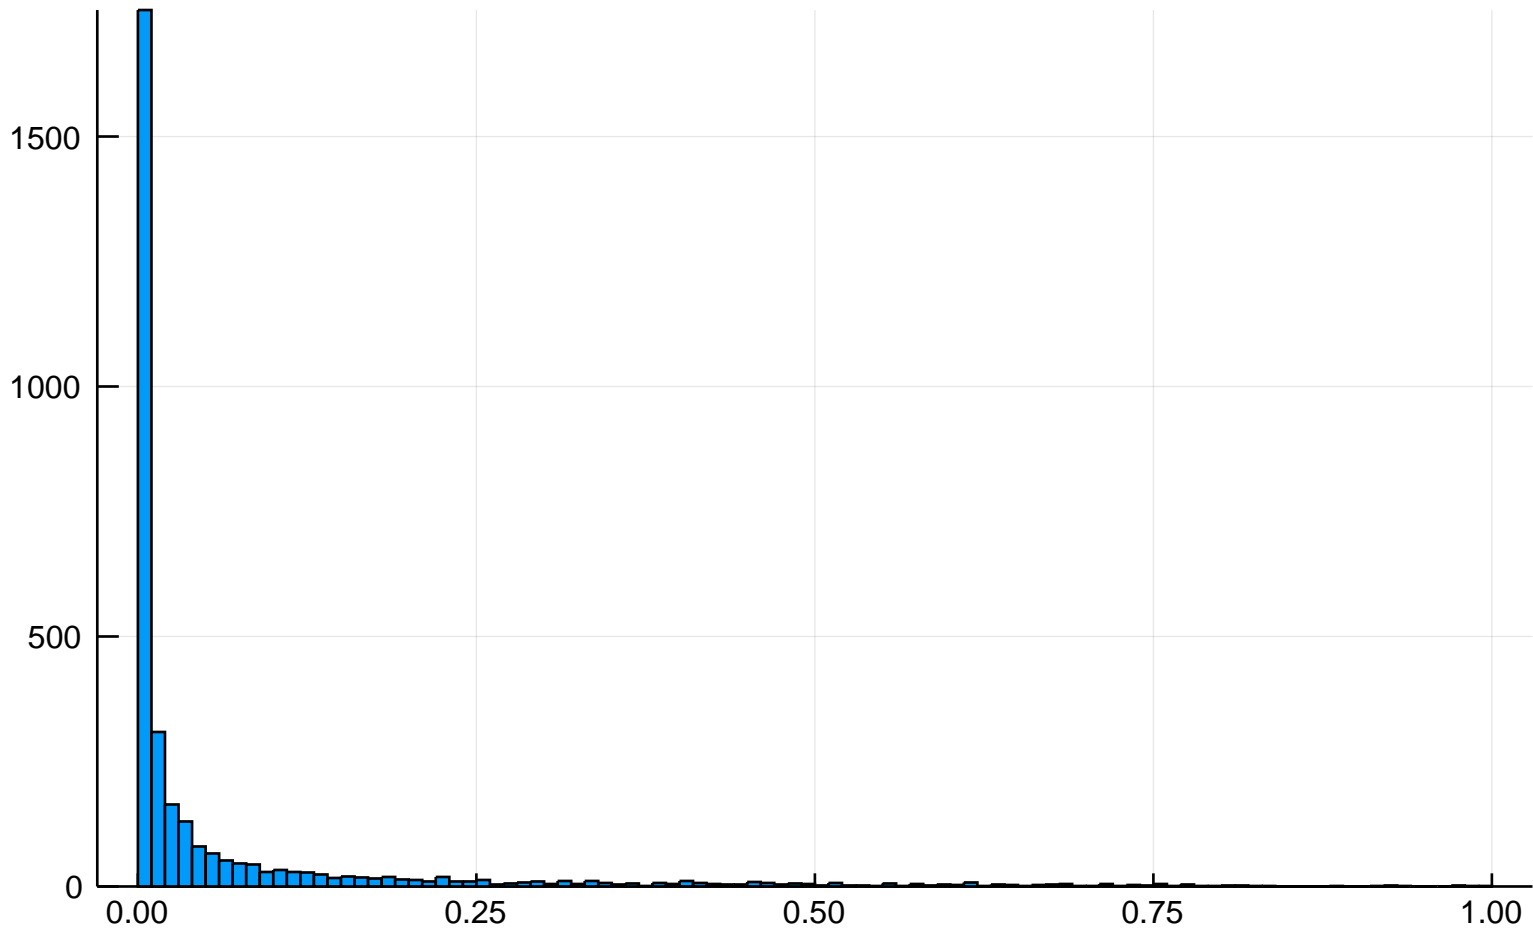

Mean: 0.07, stdev: 0.14

# Fruits no juice Apples raisins bananas o (per row)

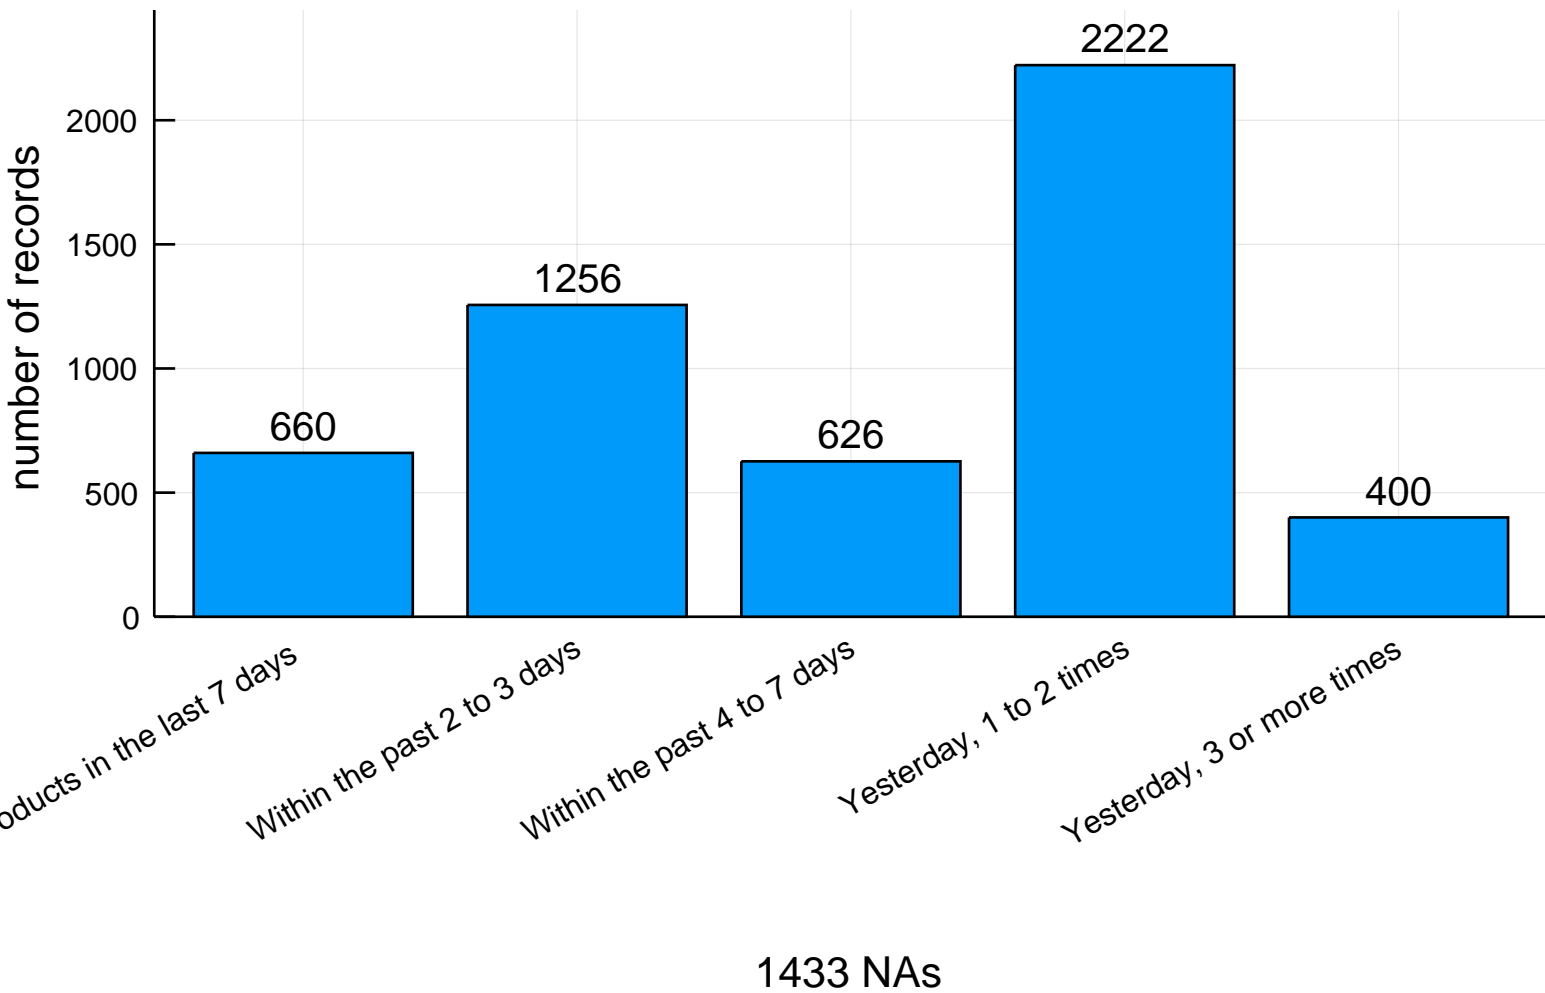

# Fruit juice orange apple cranberry prune (per row)

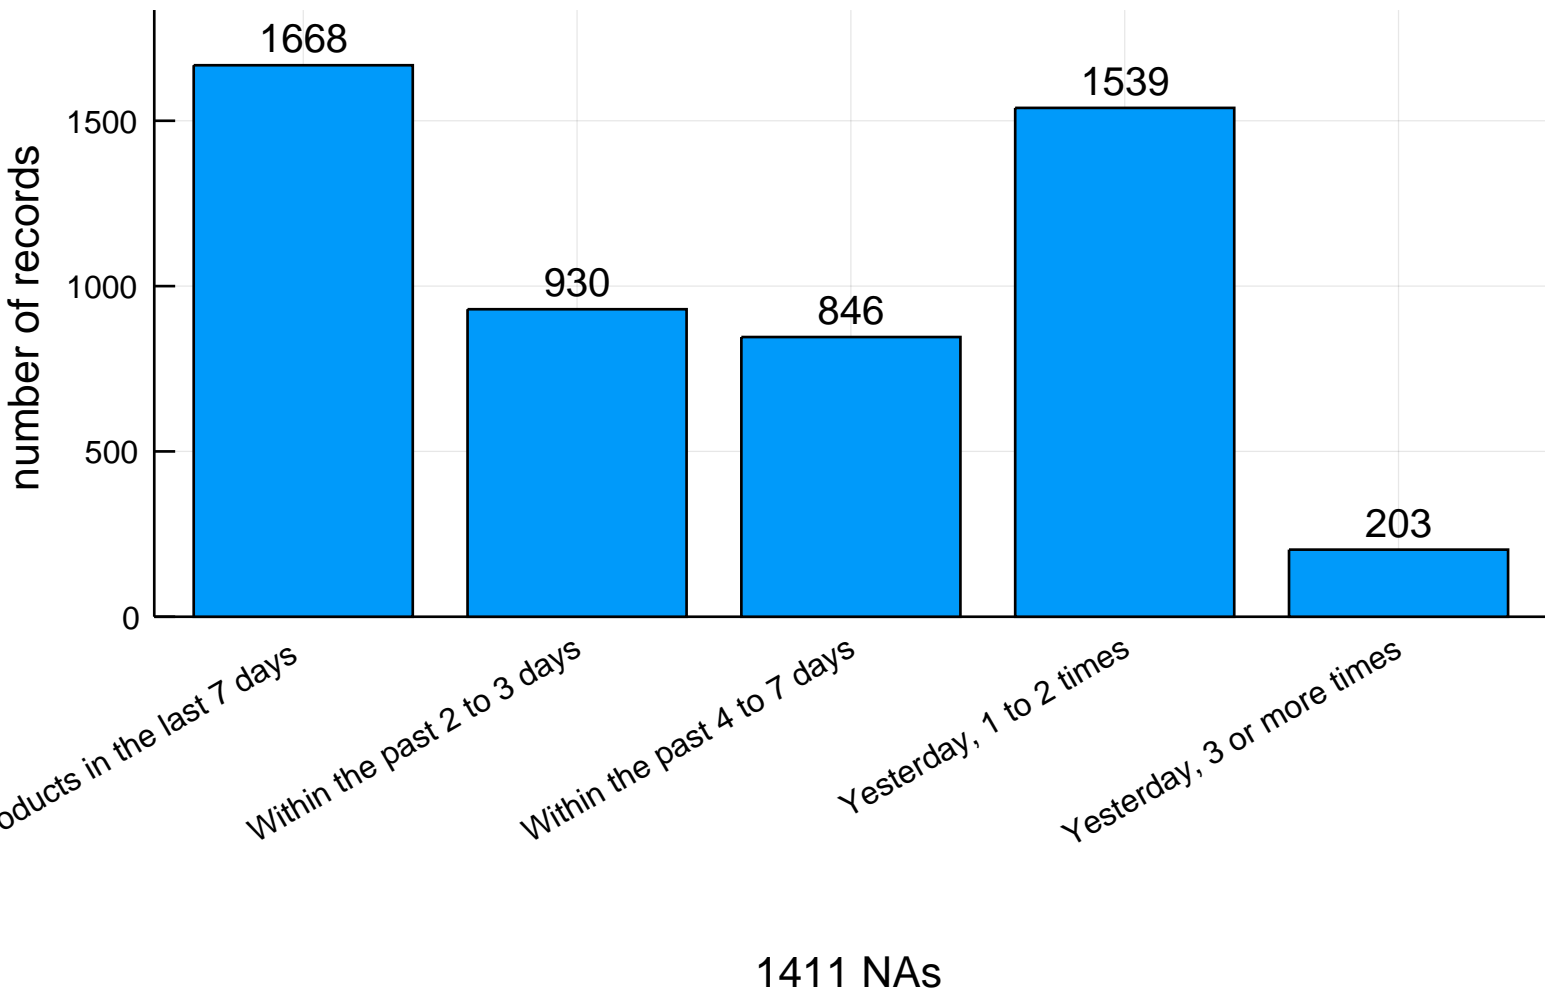

# General wellbeing (per site\_sub\_coll)

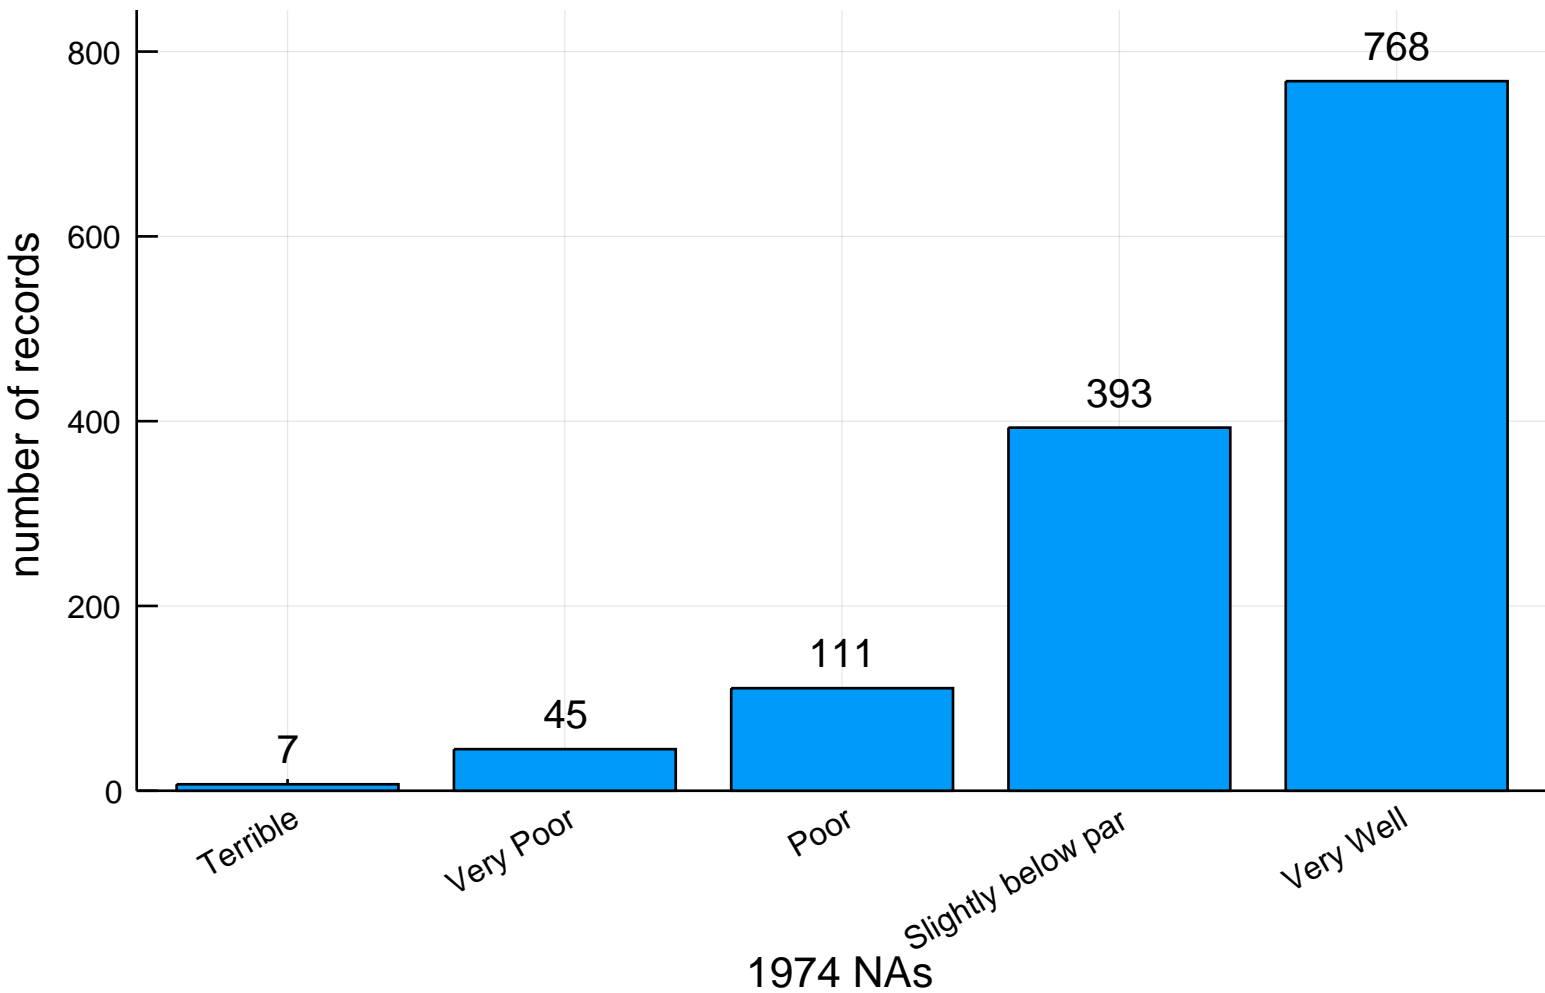

# General well being over the past 24 hour (per site\_sub\_coll)

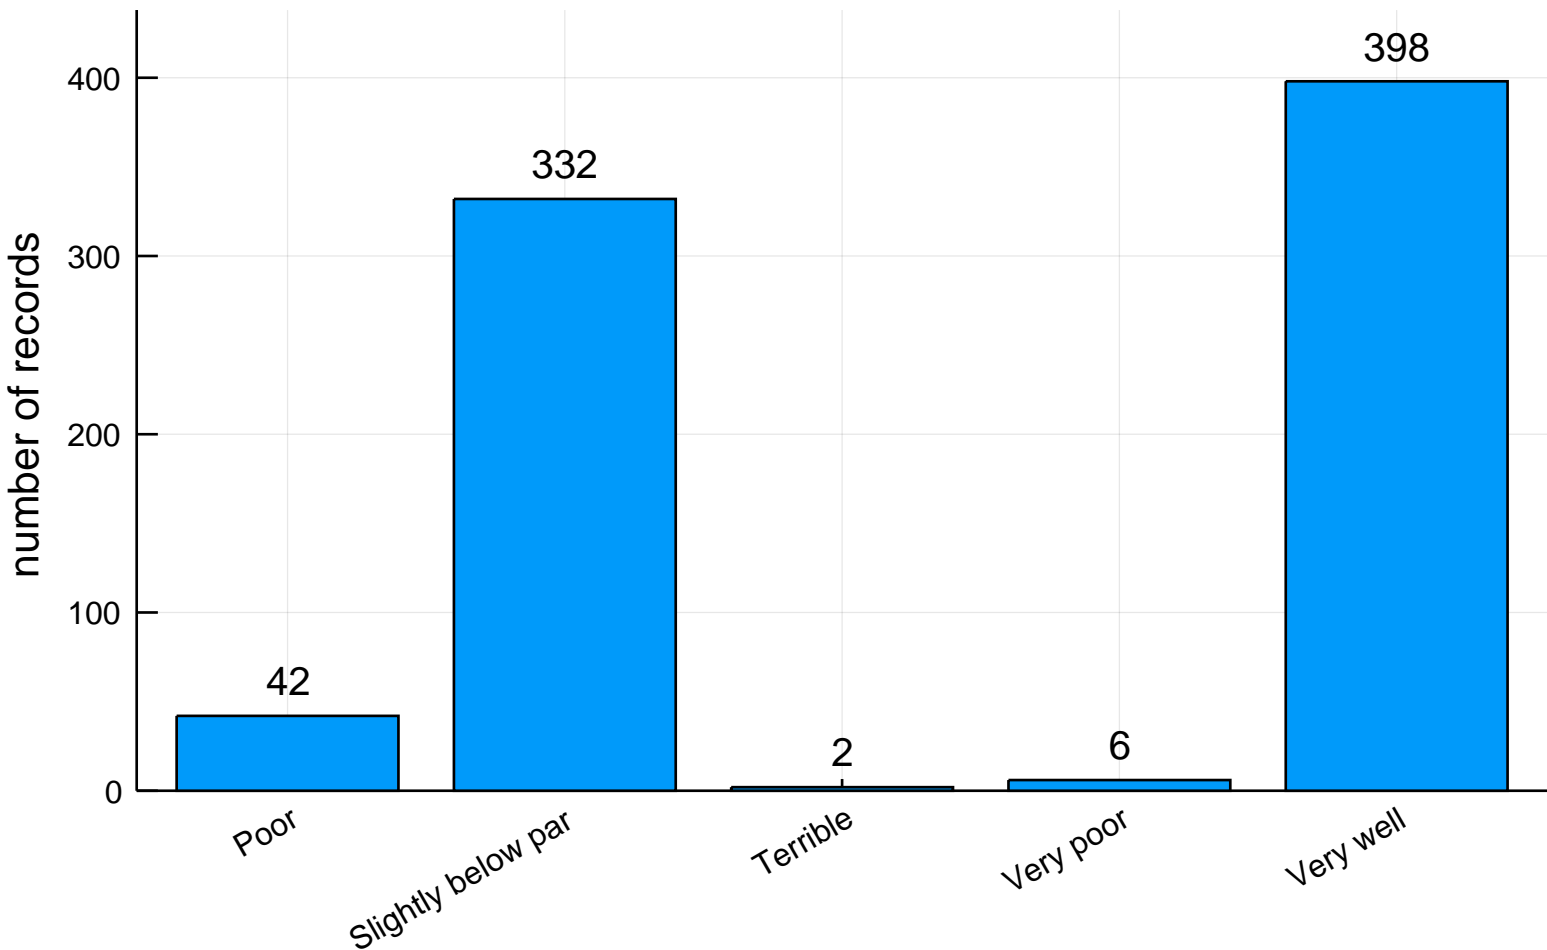

2518 NAs

# Grandparents (per Participant\_ID)

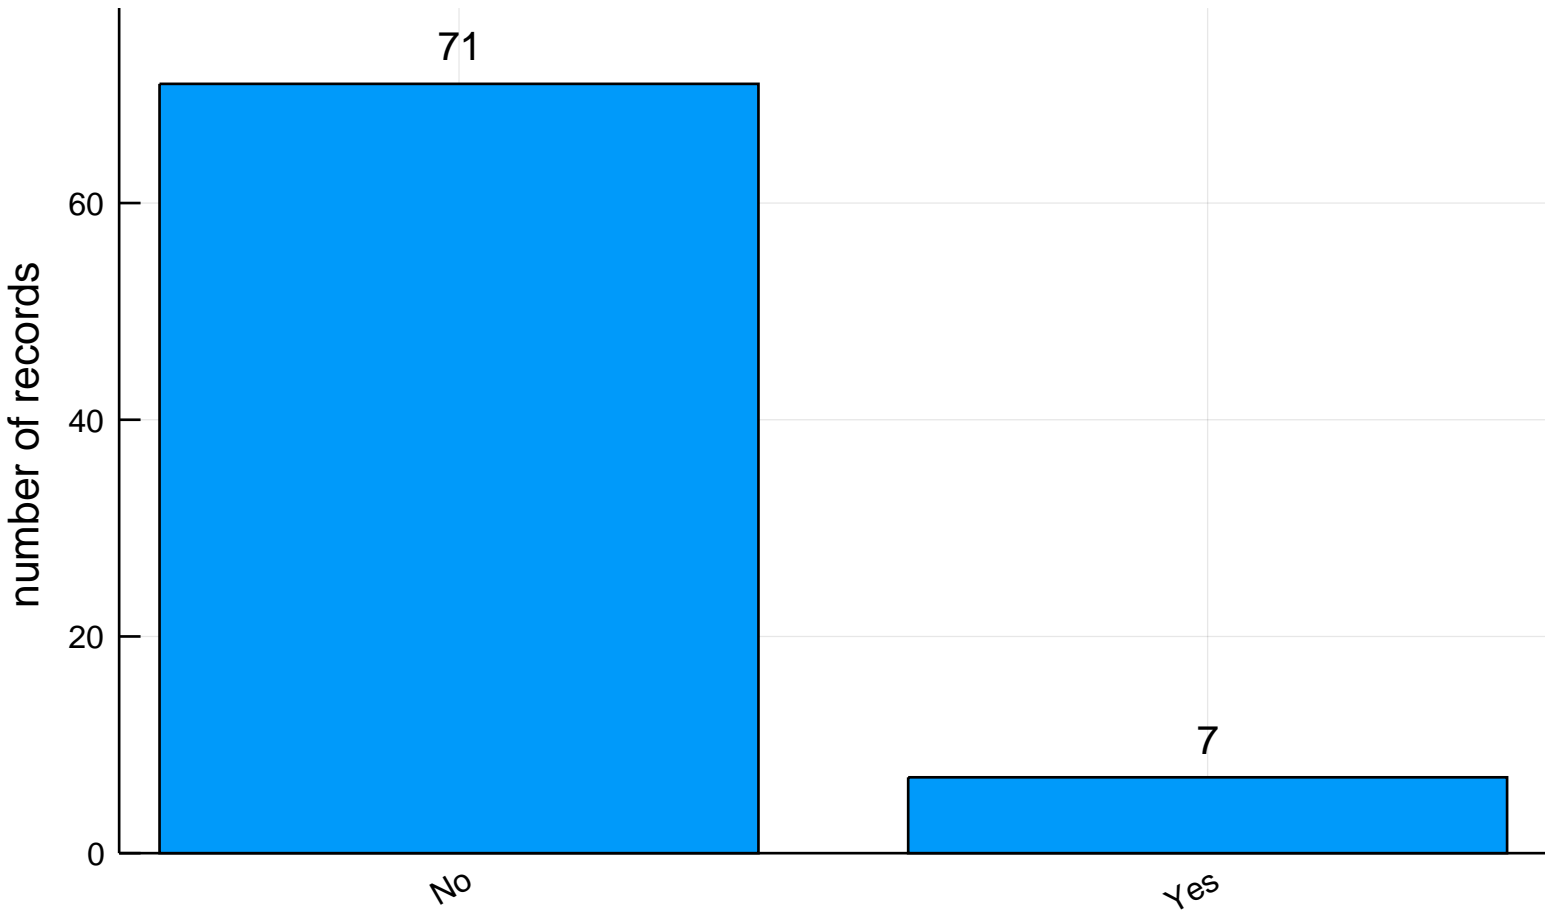

75 NAs



# Grave s disease (per site\_sub\_coll)

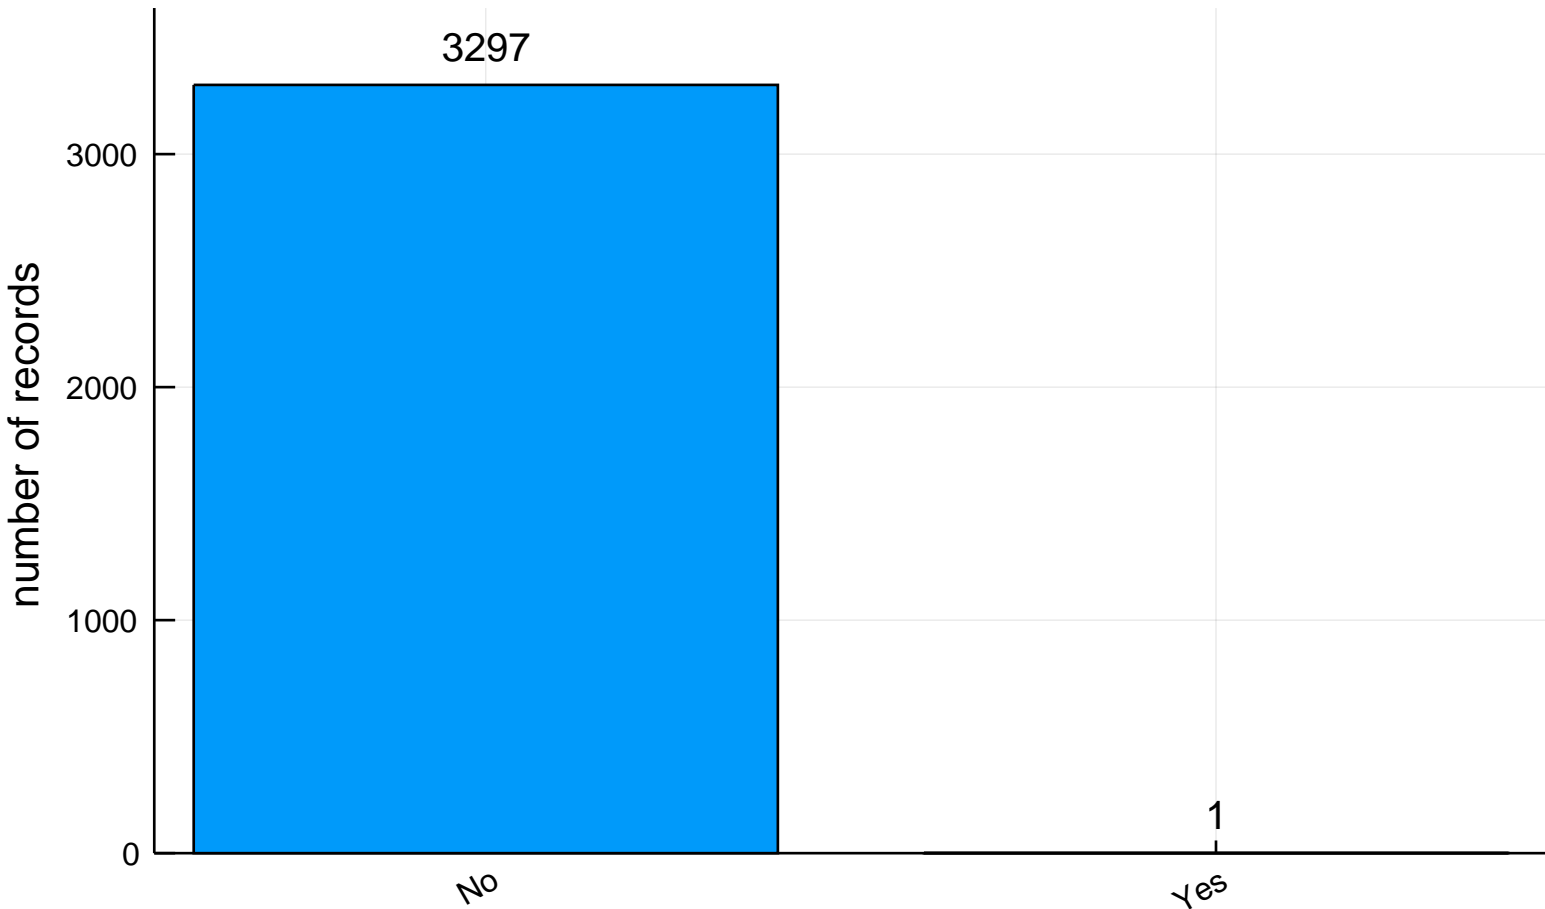

0 NAs

# GSSR IDs (per row)

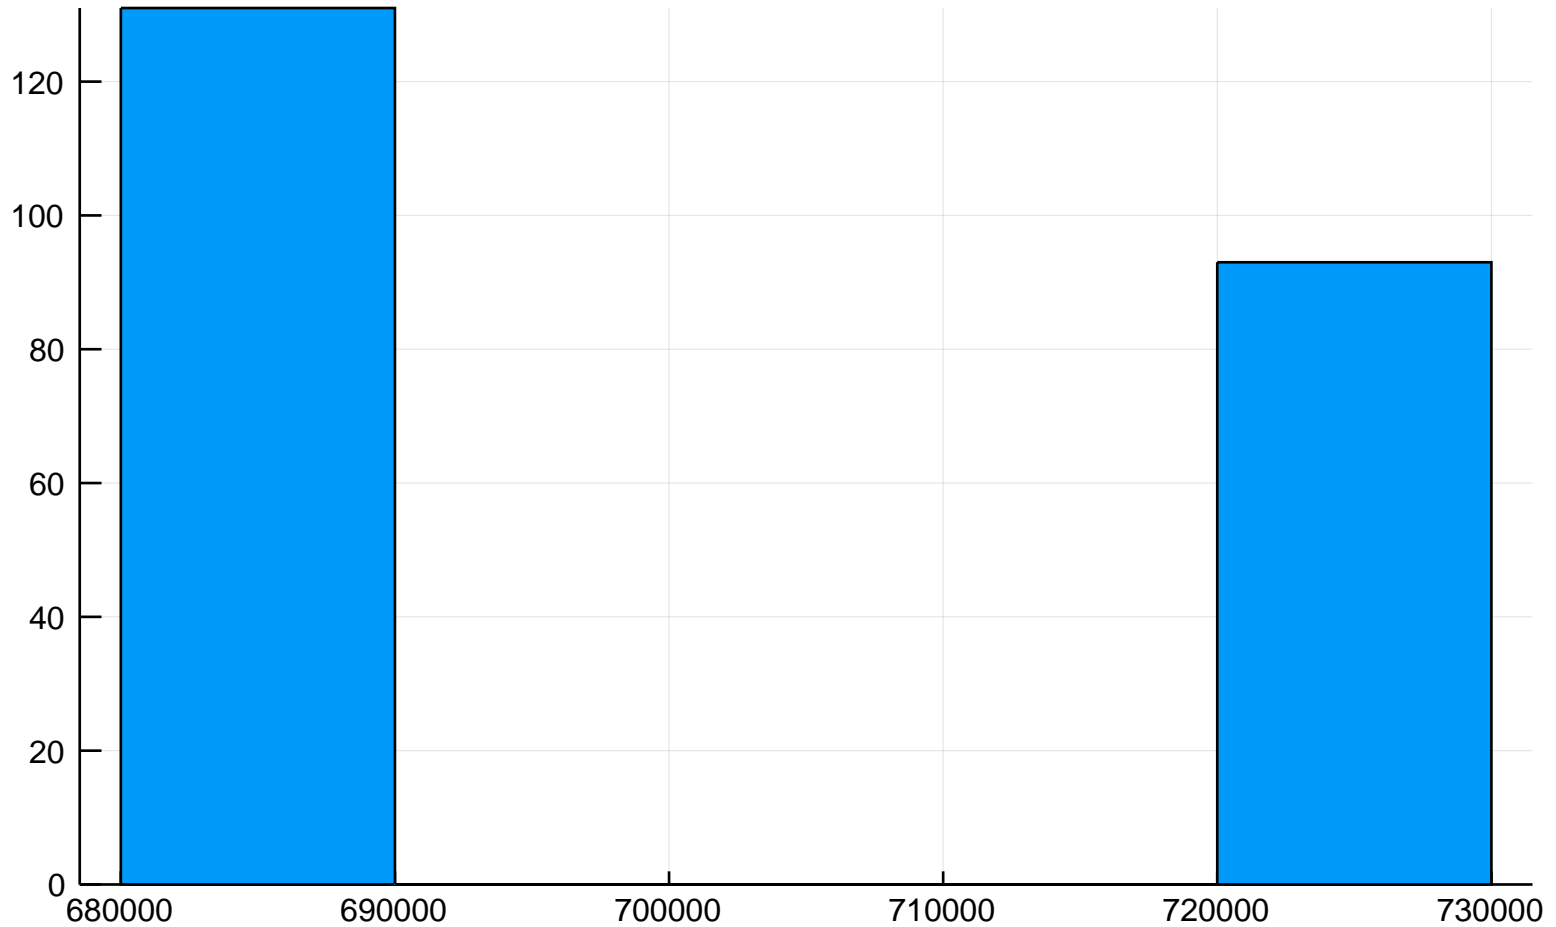

Mean: 703378.79, stdev: 17473.09

# Has subject had an upper or lower endosc (per Participant\_ID

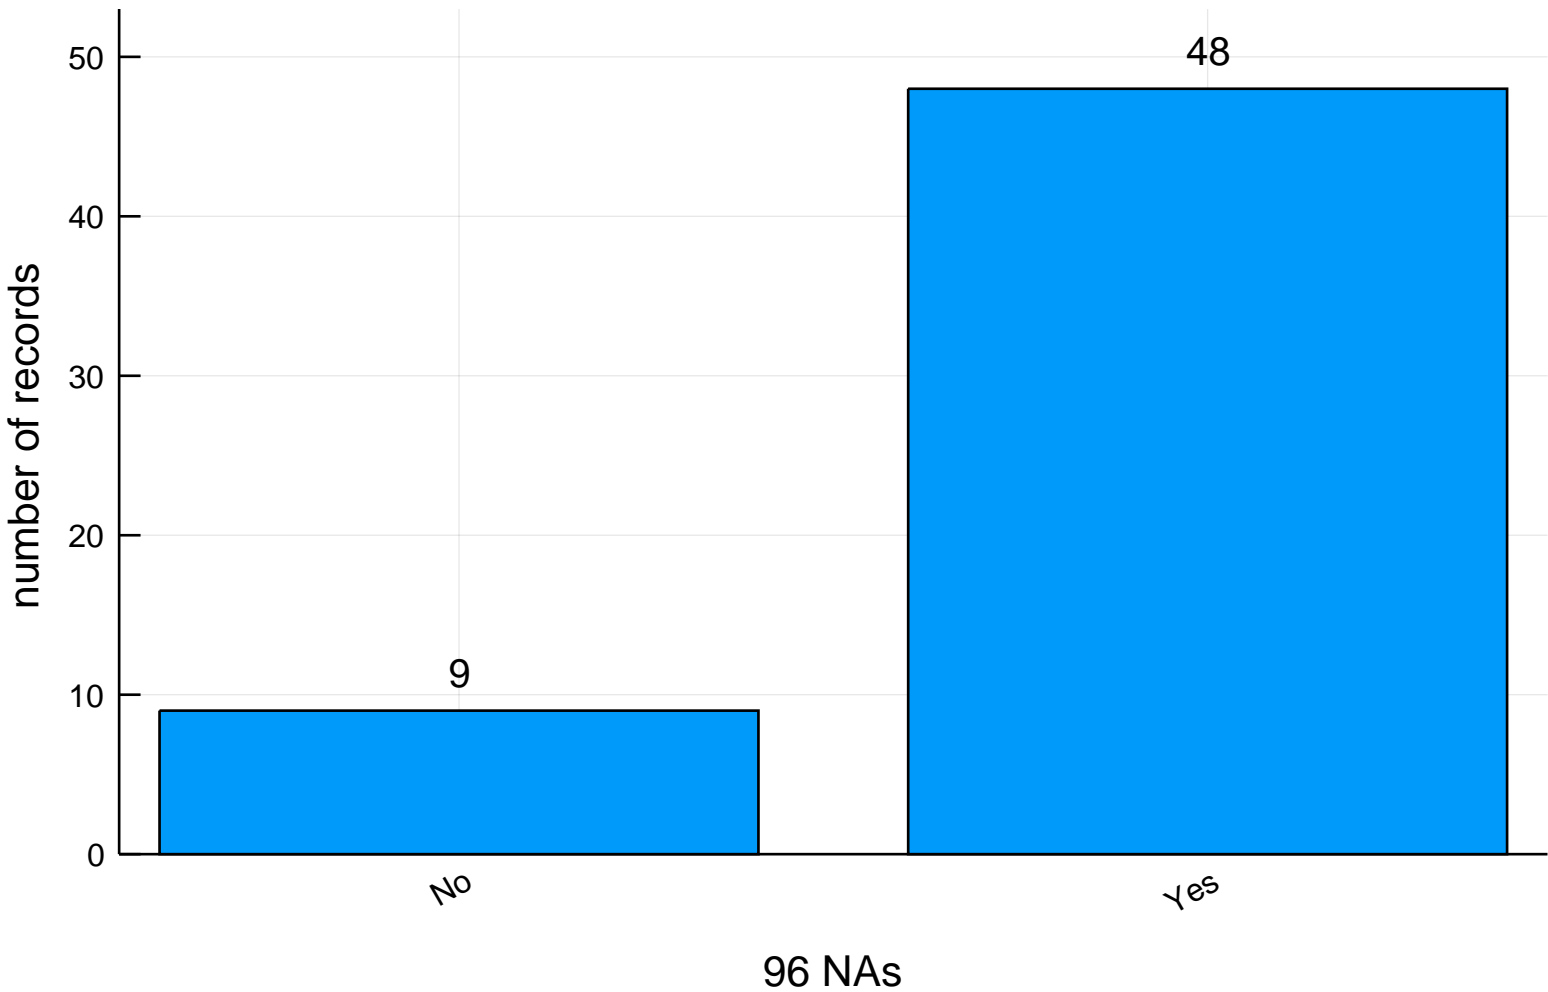

Has subject undergone any GI related rad (per Participant\_ID

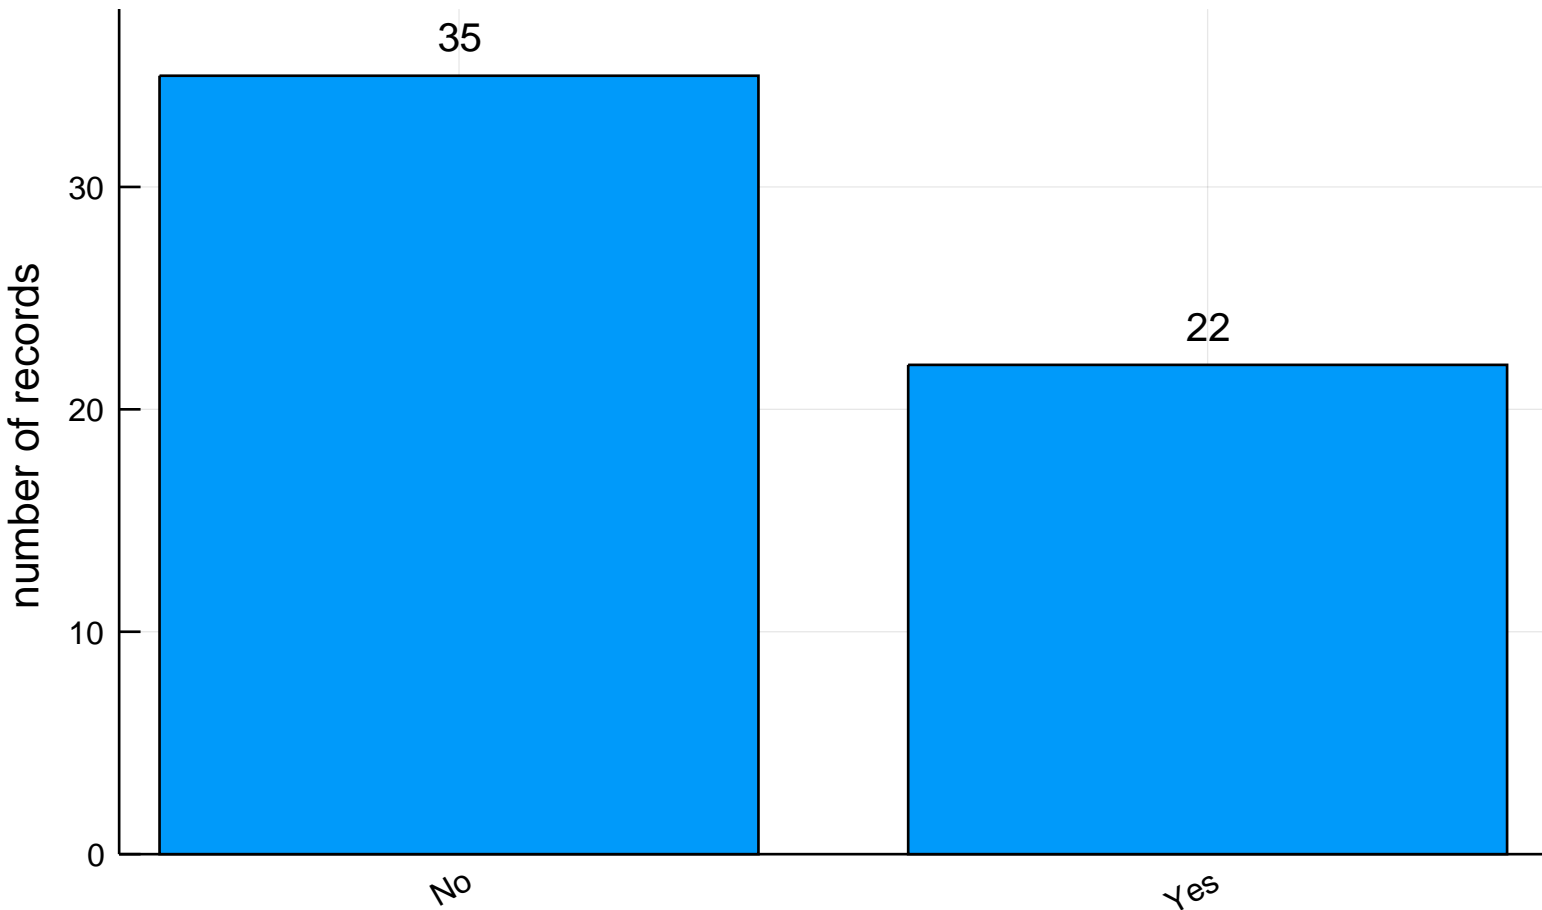

96 NAs

# Has subject undergone any GI related sur (per Participant\_ID)

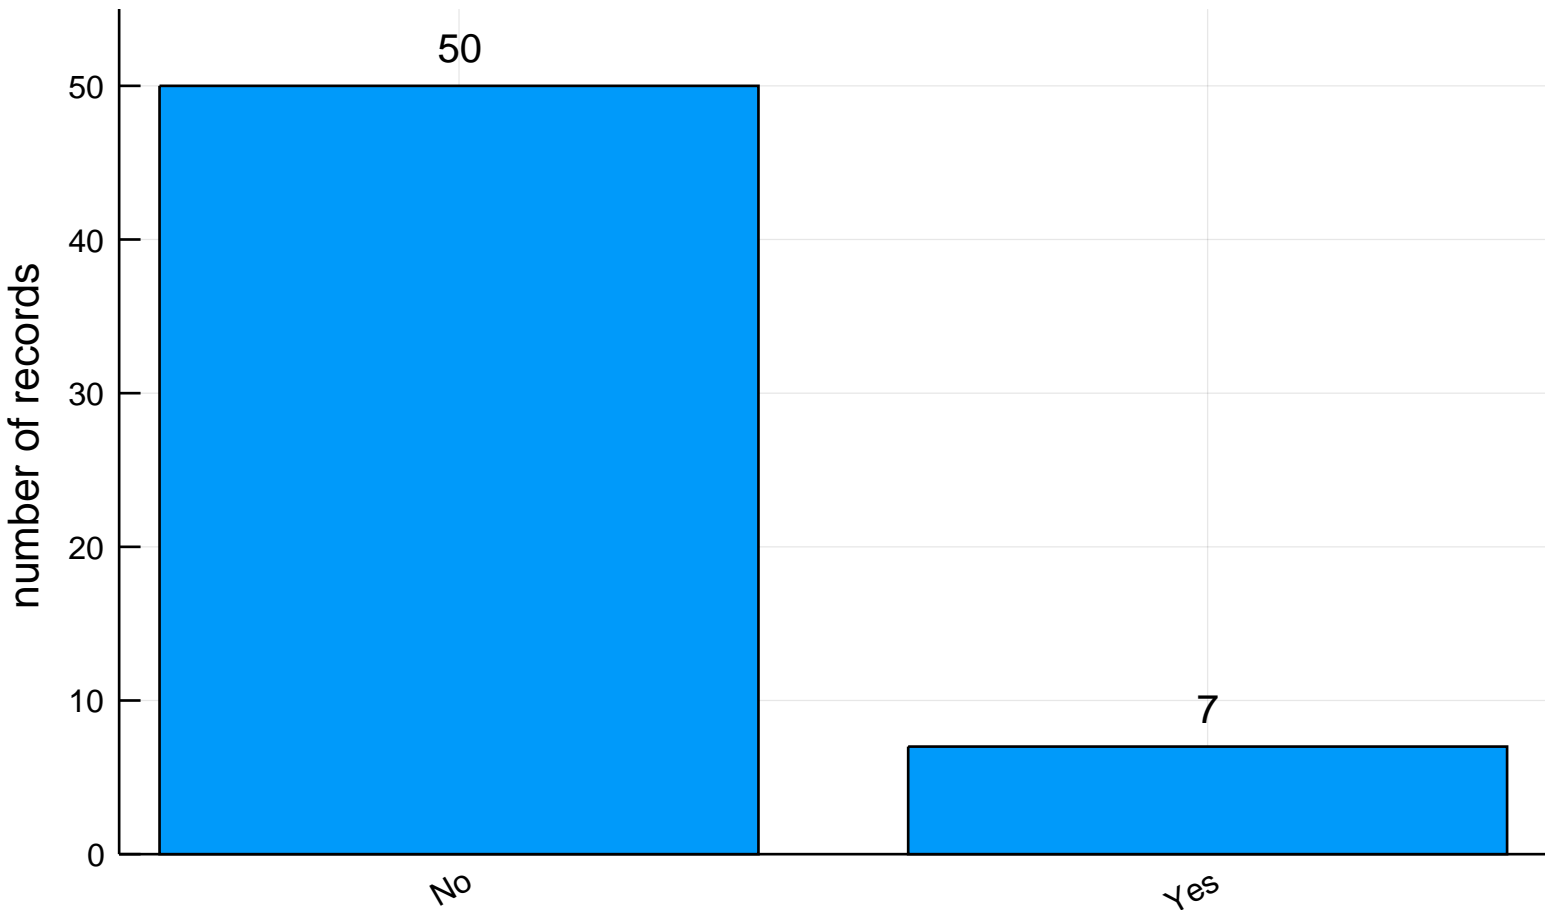

96 NAs

# Has the next visit been scheduled (per Participant\_ID)

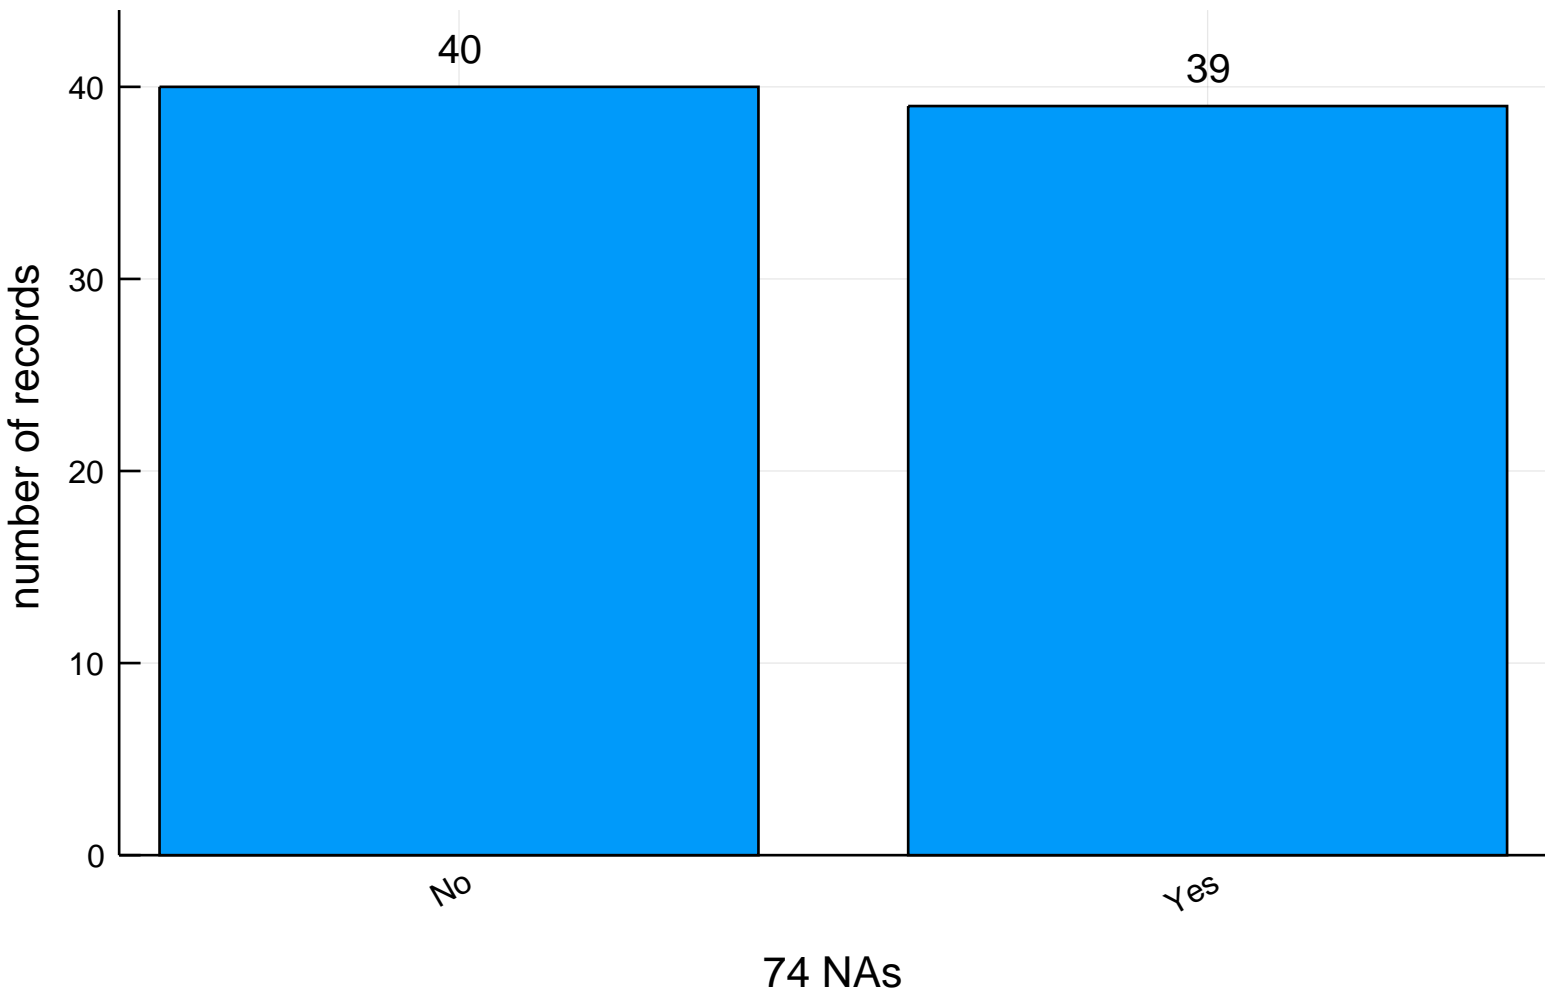

# Has the subject been given new stool kit (per Participant\_ID)

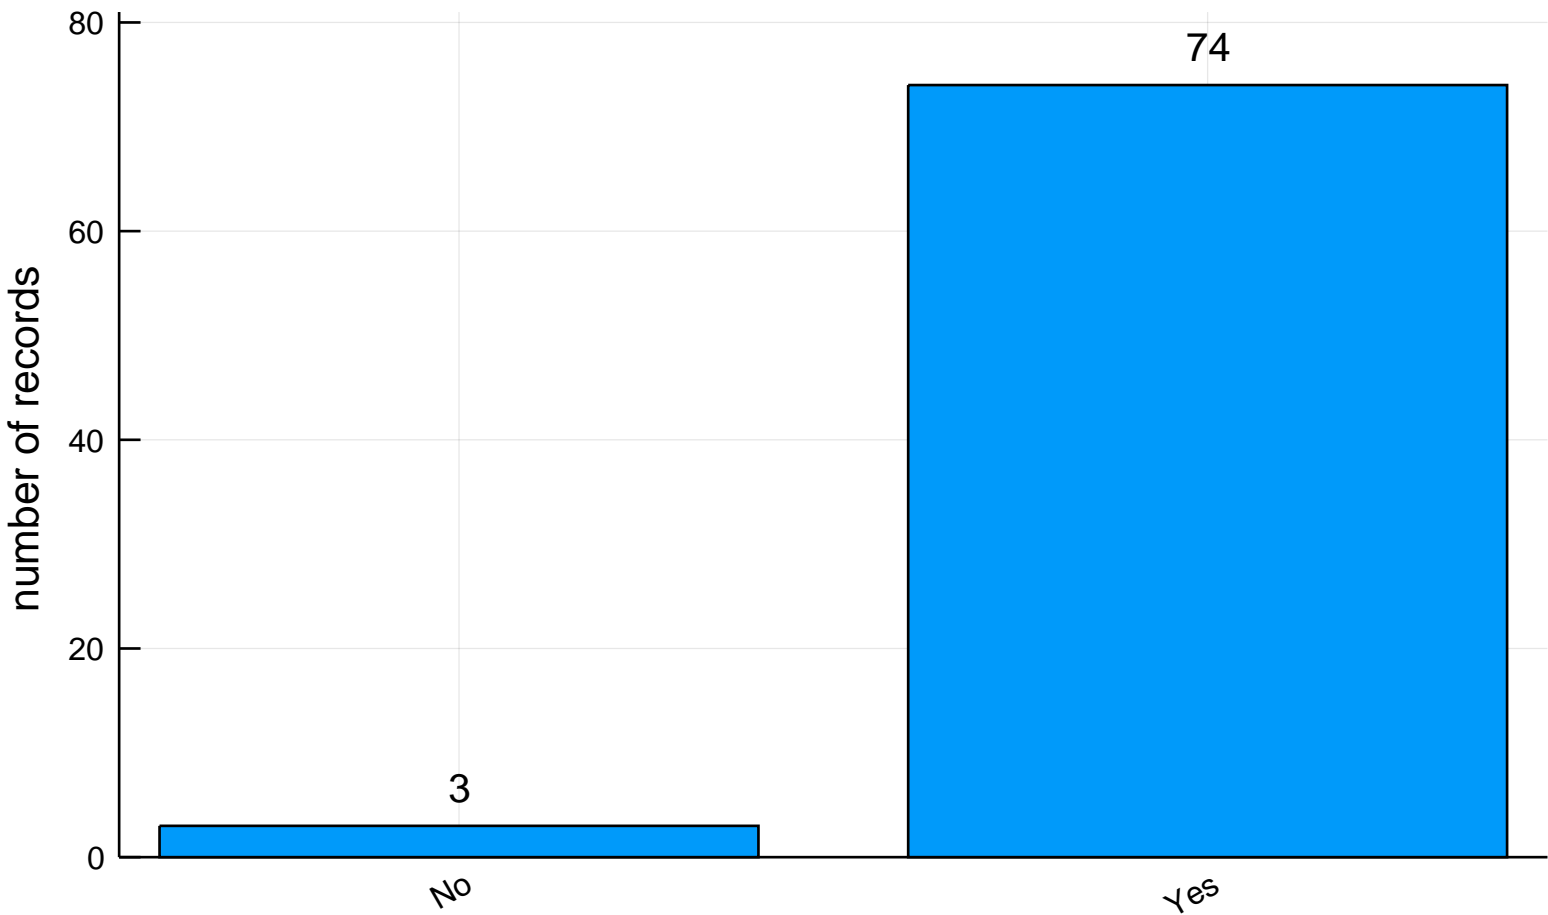

76 NAs

Has the subject been given the C1 kit an (per Participant\_ID)

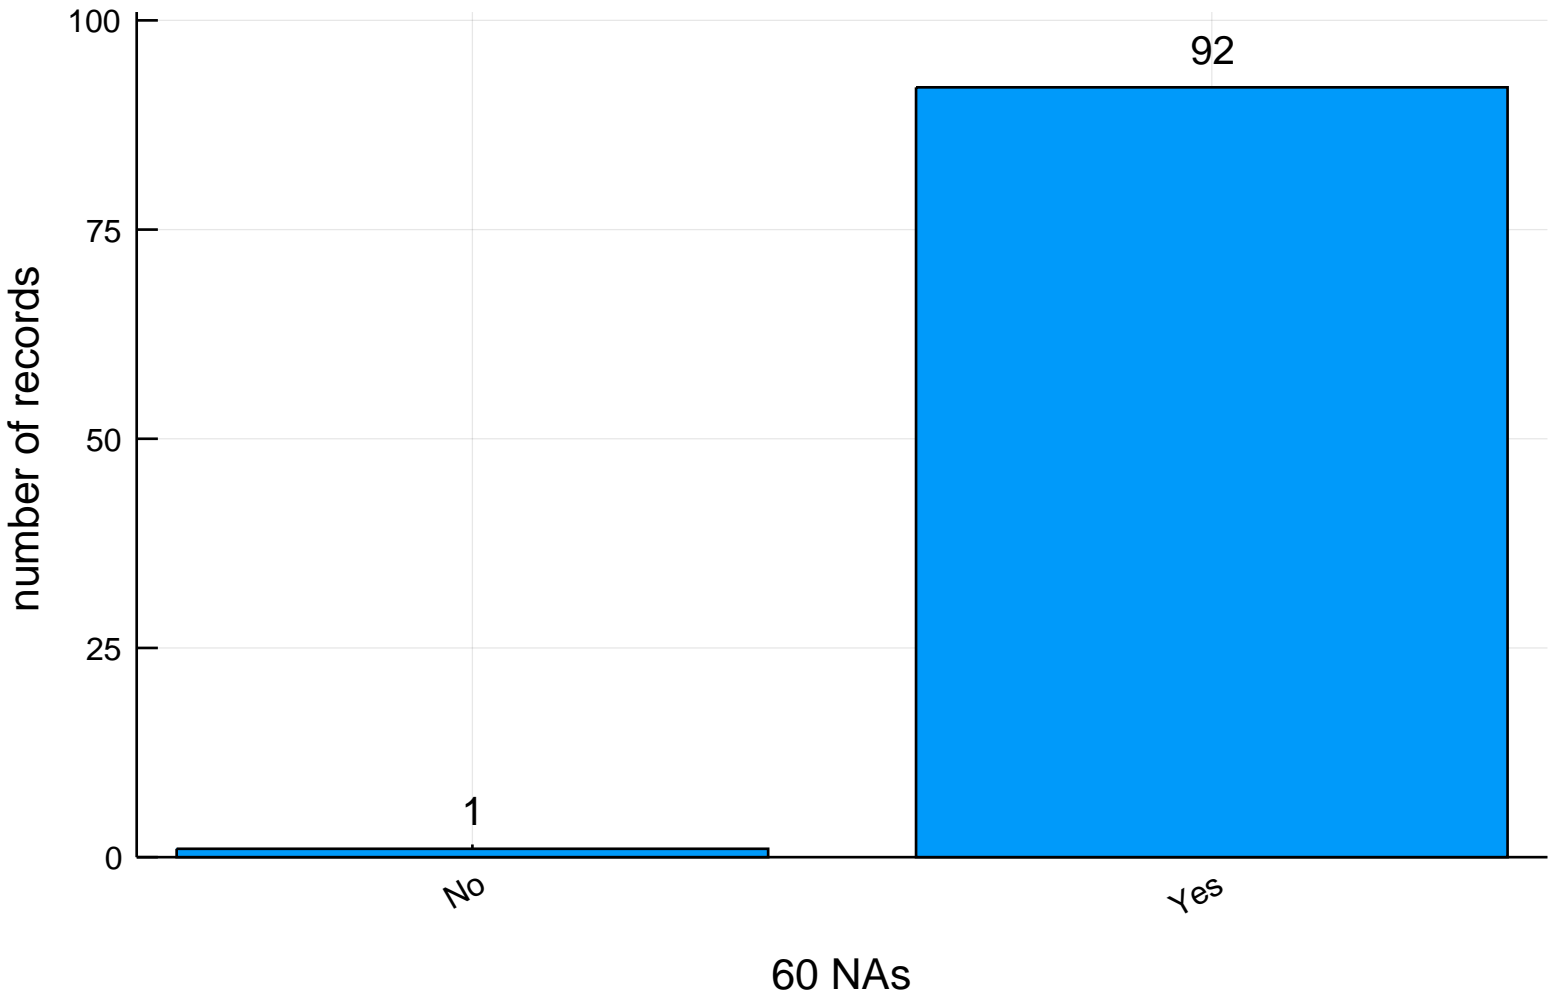



Has the subject been hospitalized for an (per site\_sub\_coll)

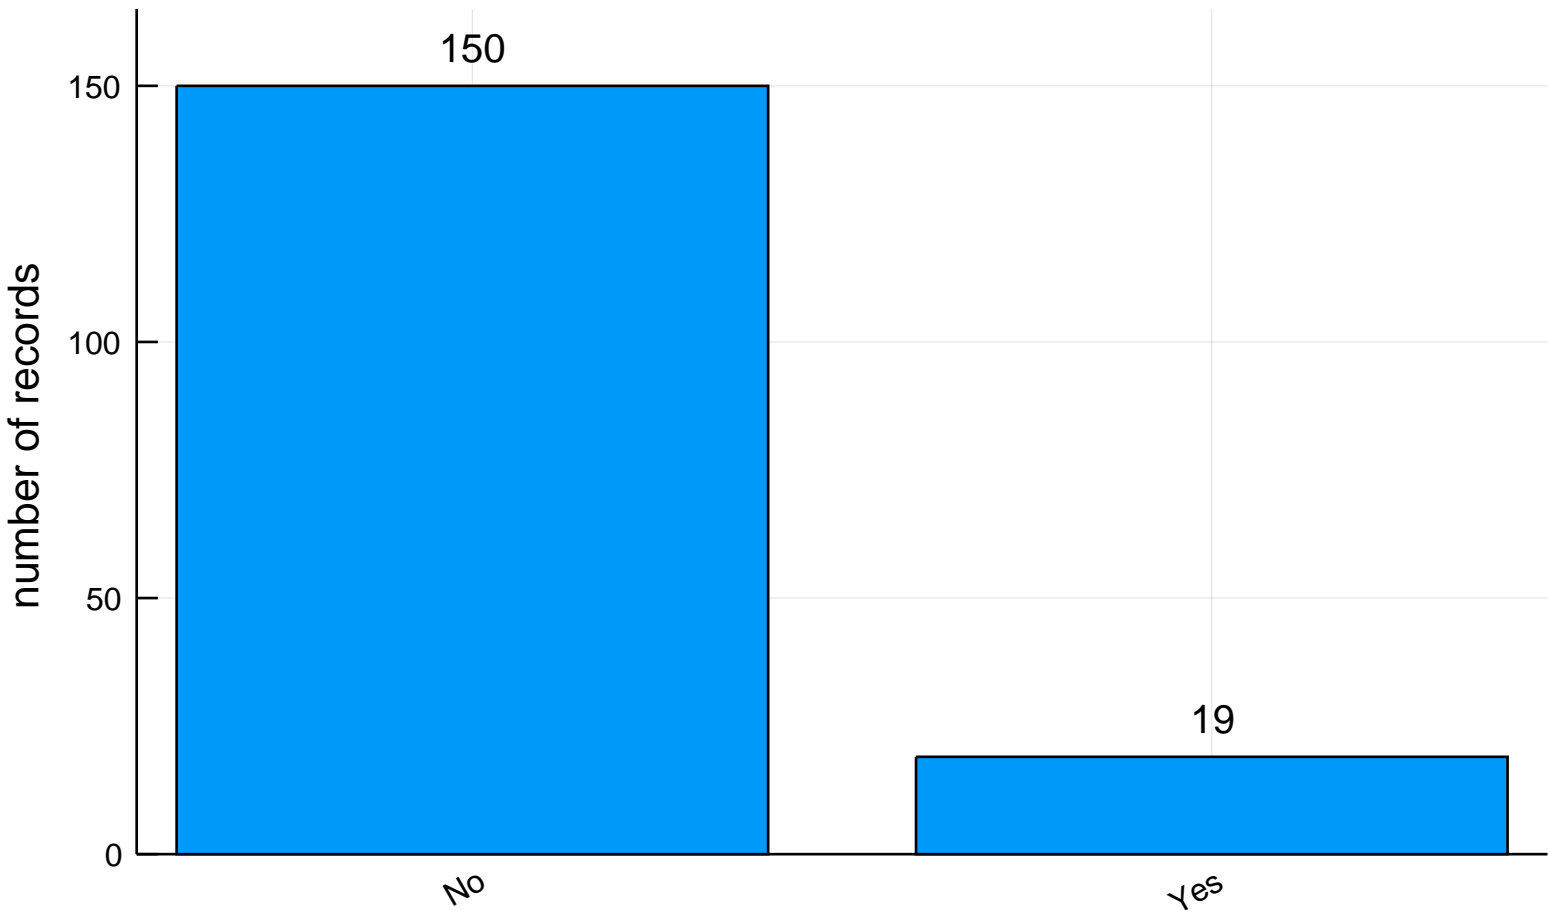

3129 NAs

# Has the subject completed the FFQ YAQ (per Participant\_ID)

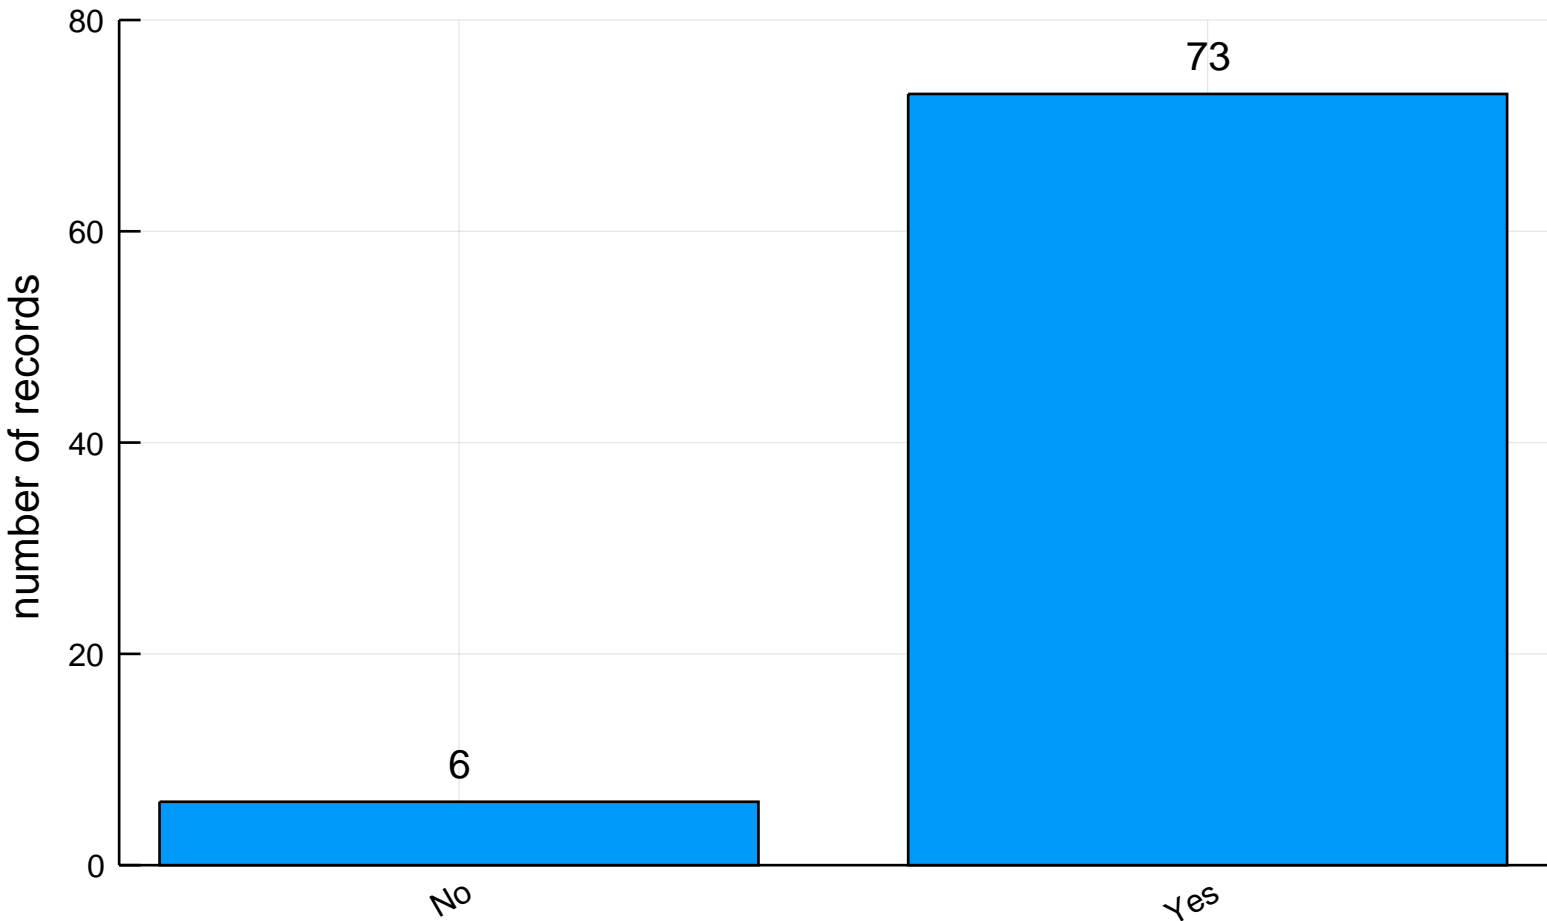

74 NAs

Has the subject had any accute diarrheal (per site\_sub\_coll)

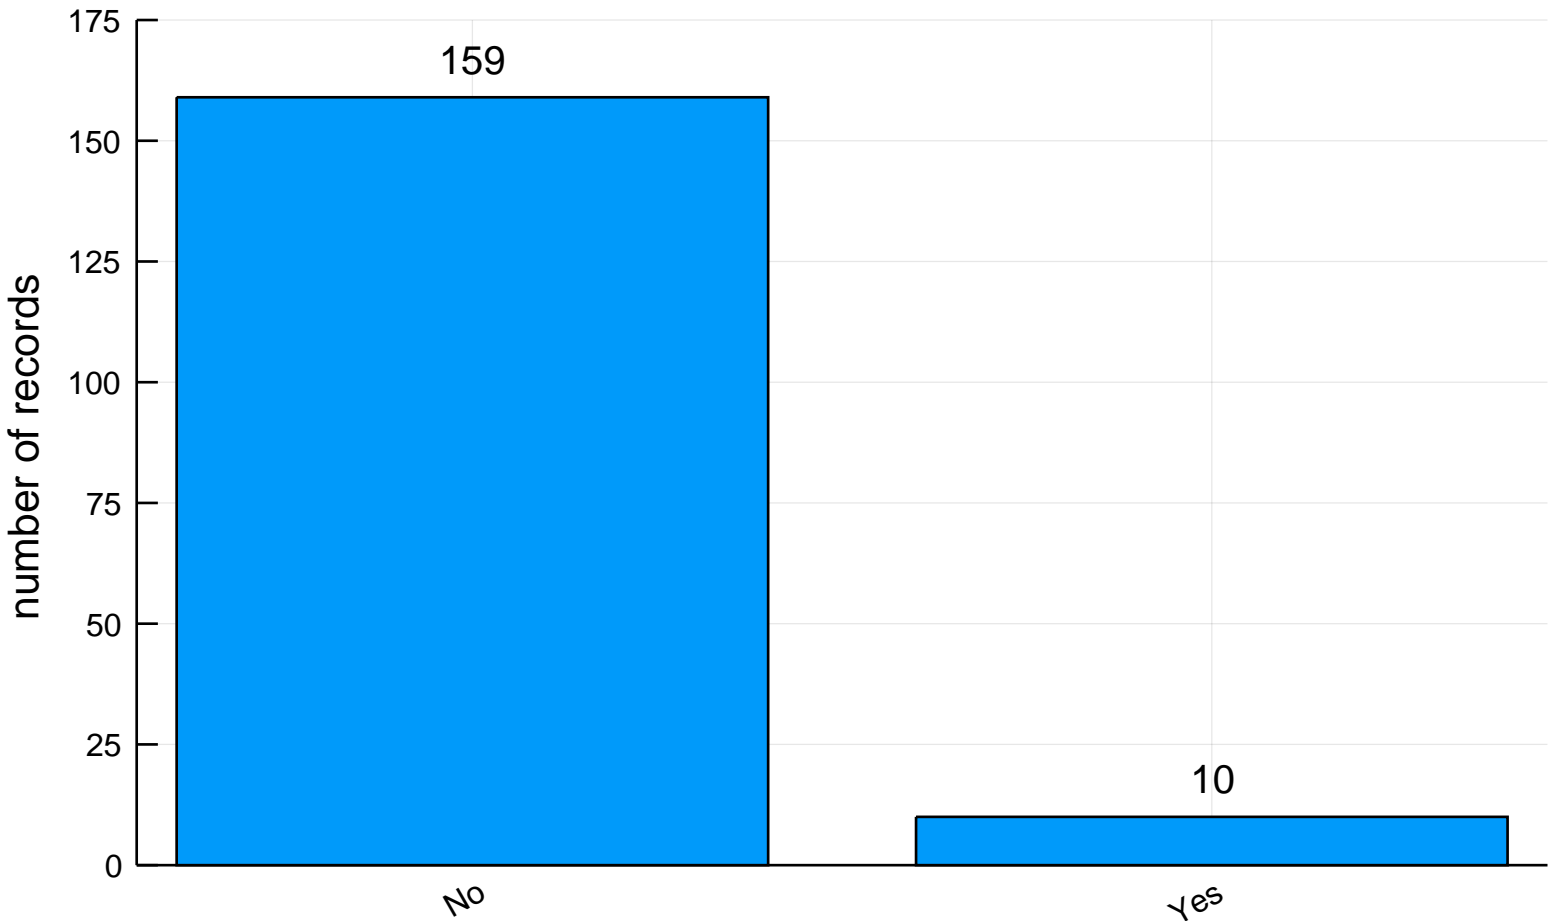

3129 NAs

Has the subject had a colonoscopy since (per site\_sub\_coll)

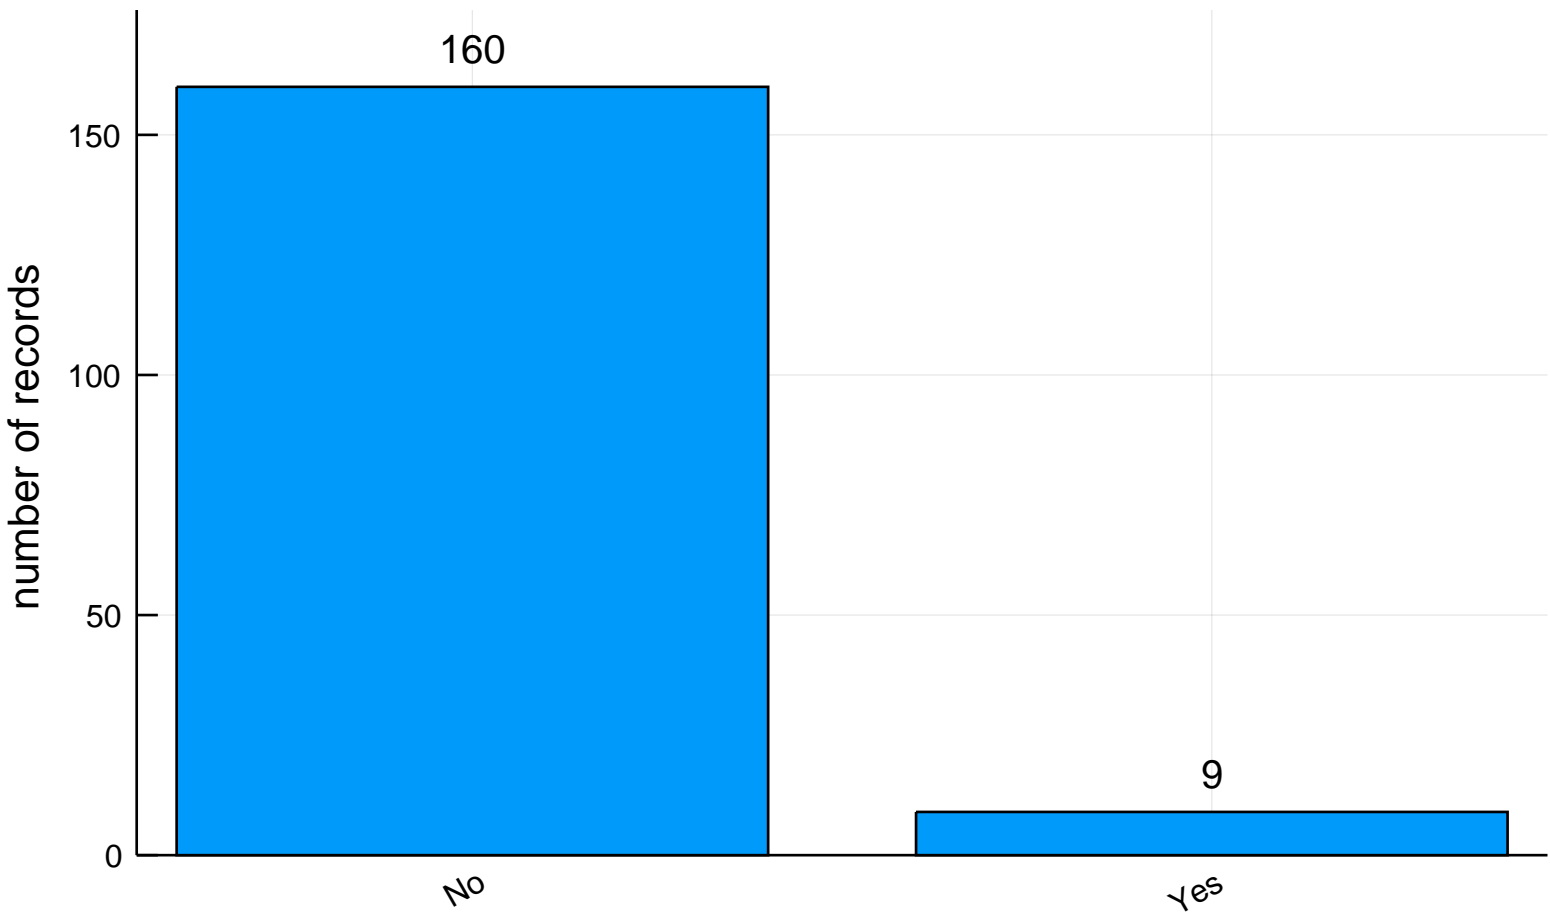

3129 NAs

# Has the subject had a prior abdominal su (per Participant\_ID)

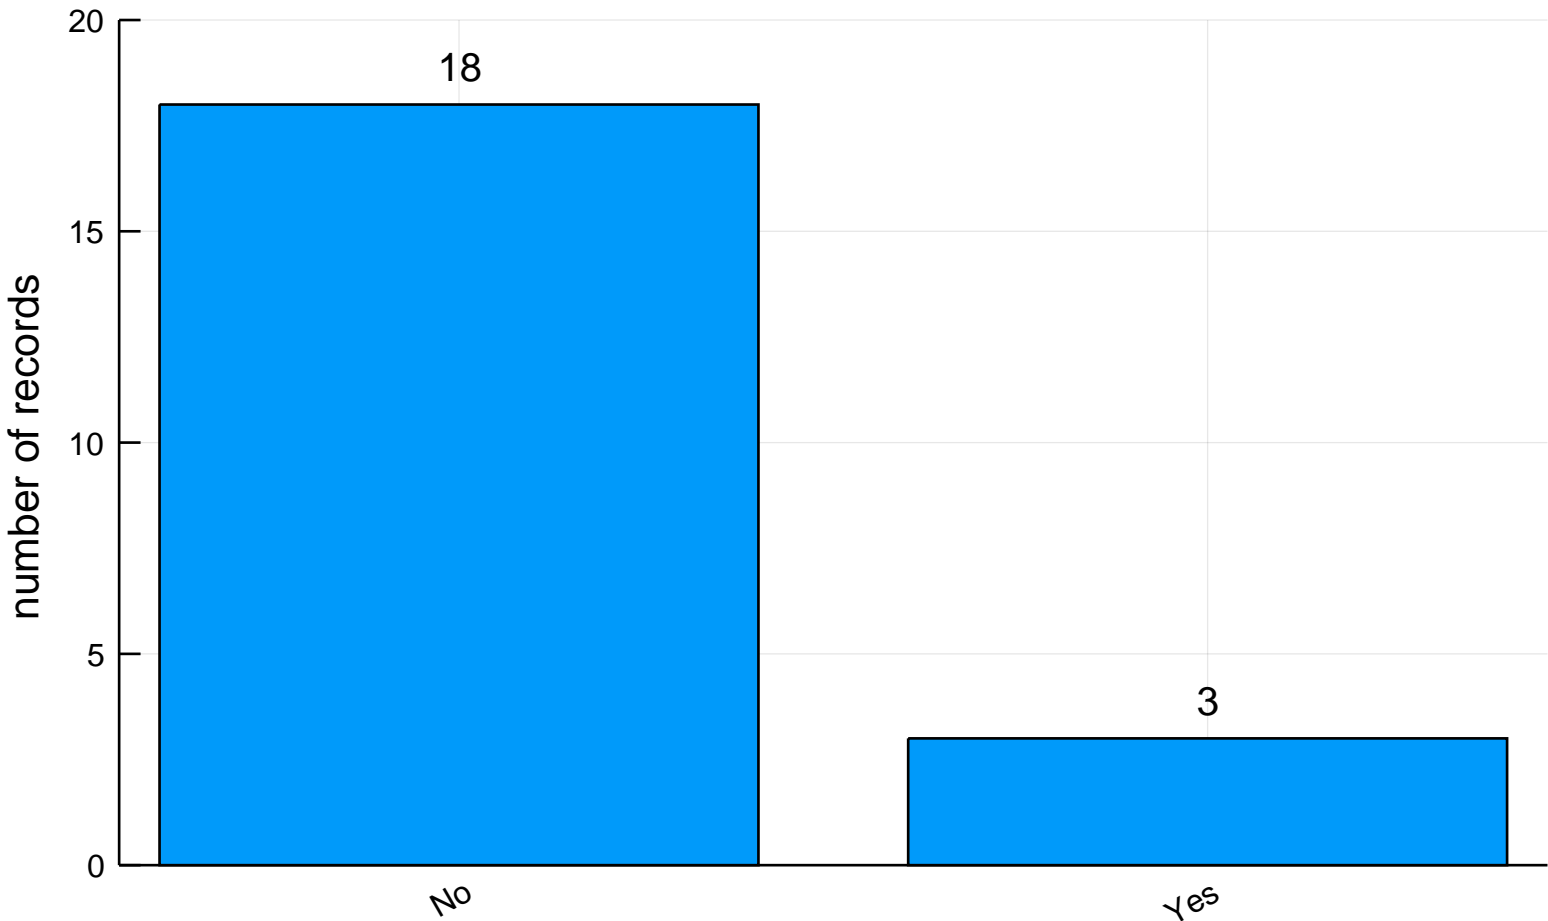

132 NAs

# Has the subject had a tonsillectomy (per Participant\_ID)

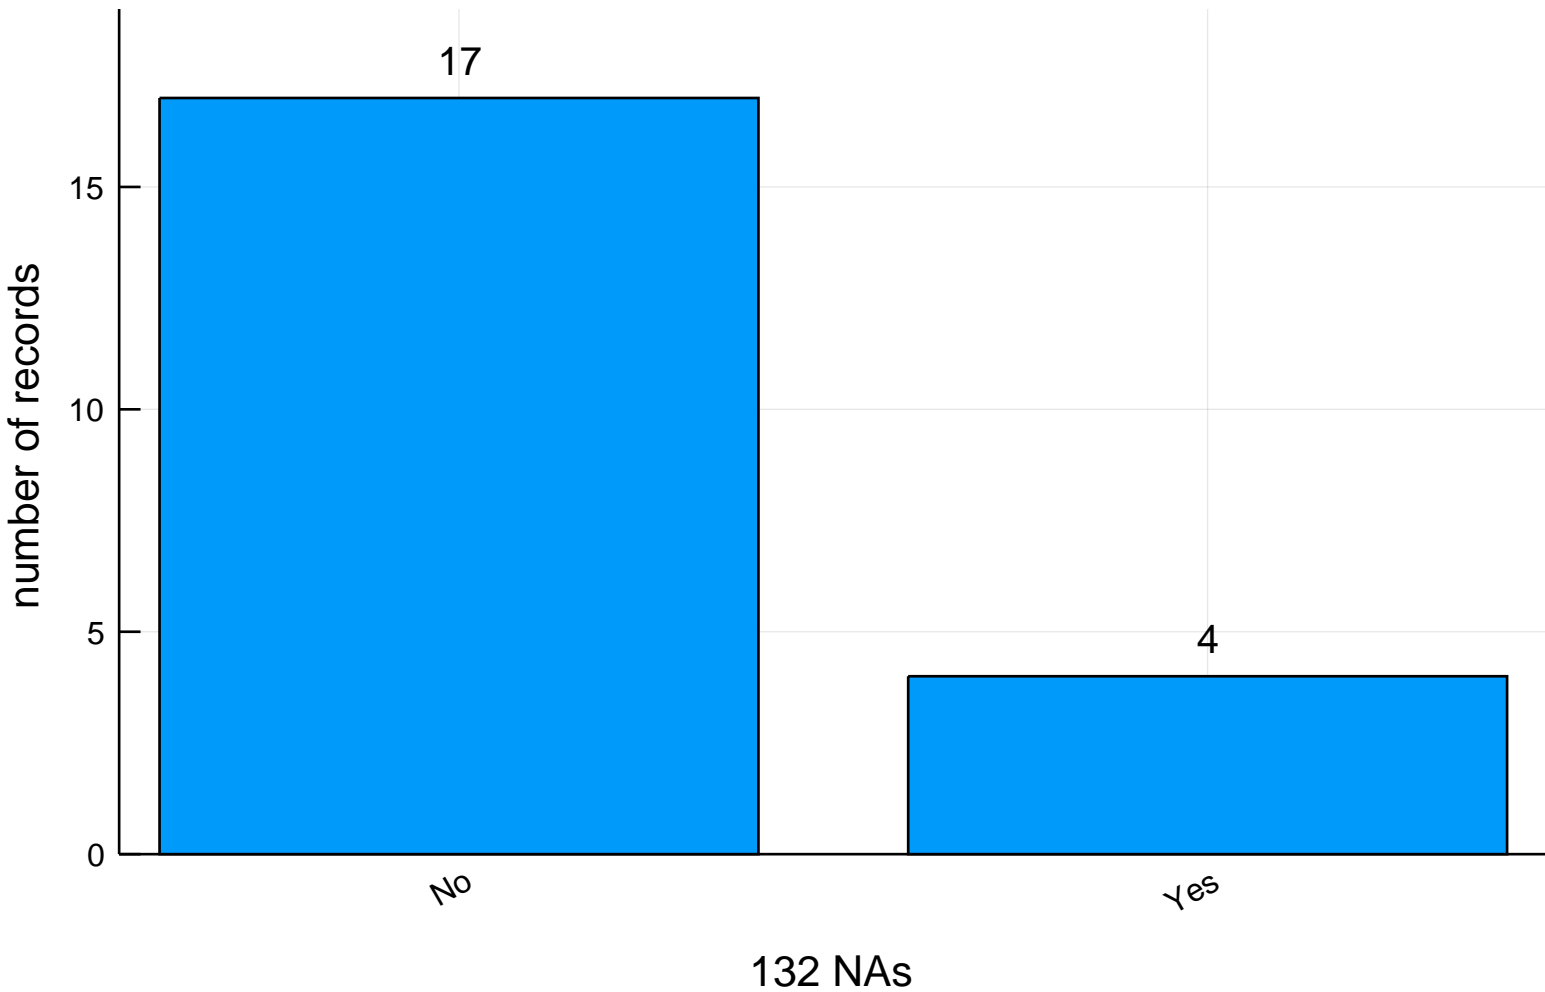

# Have samples been sent for histopatholog (per Participant\_ID

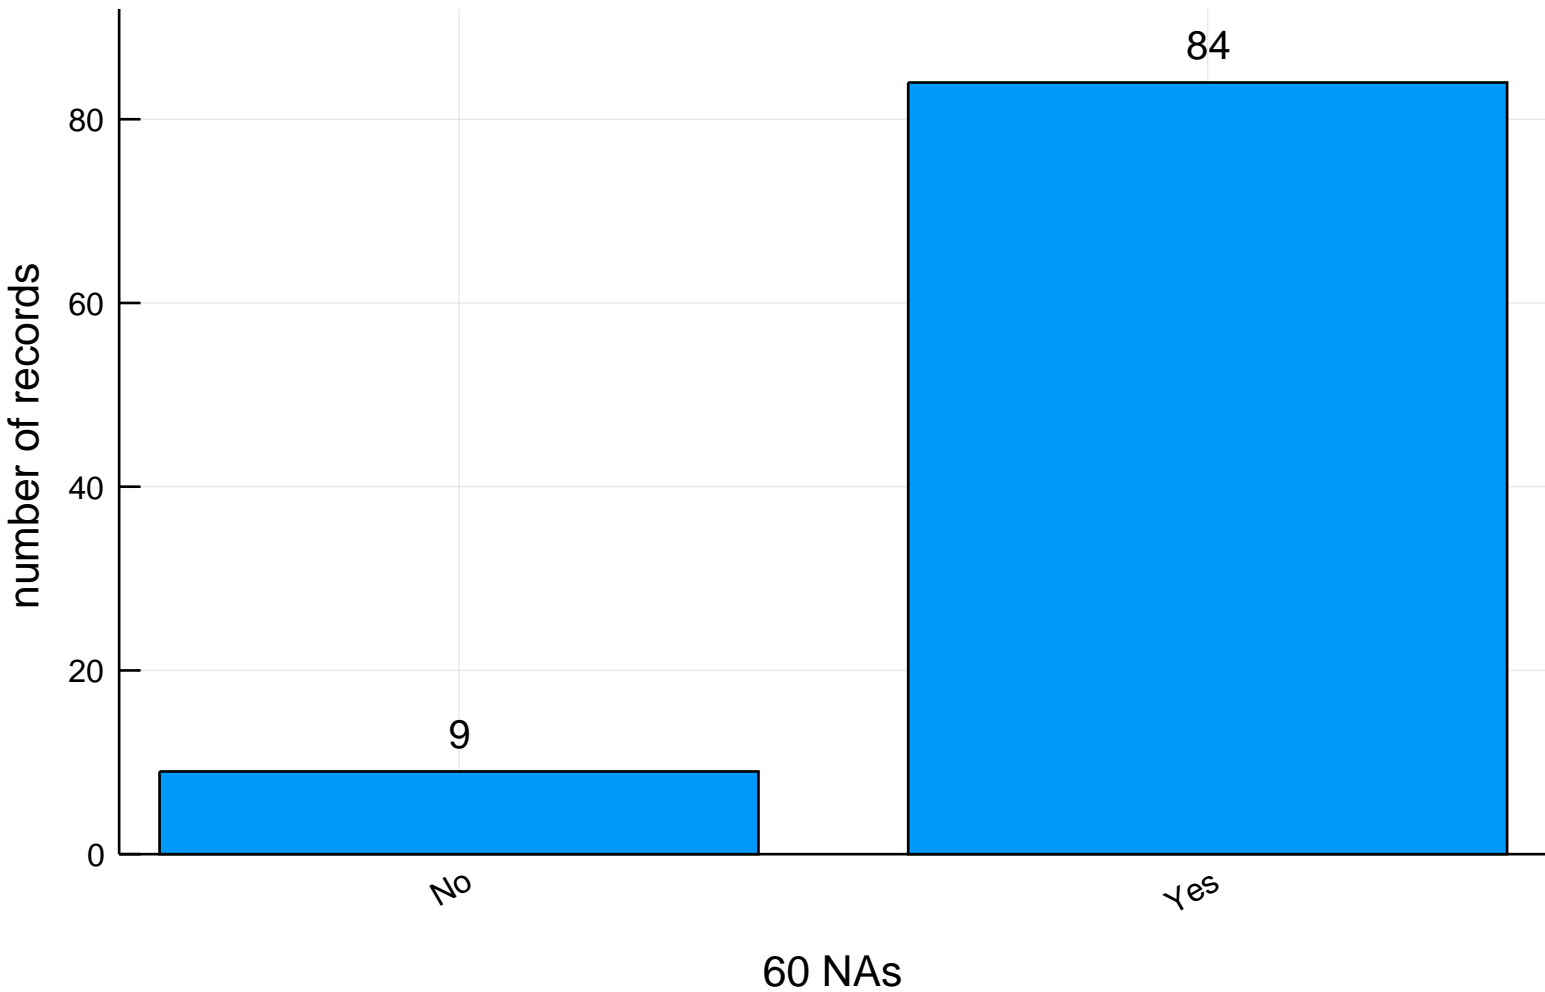

Have the following labs been drawn withi (per site\_sub\_coll)

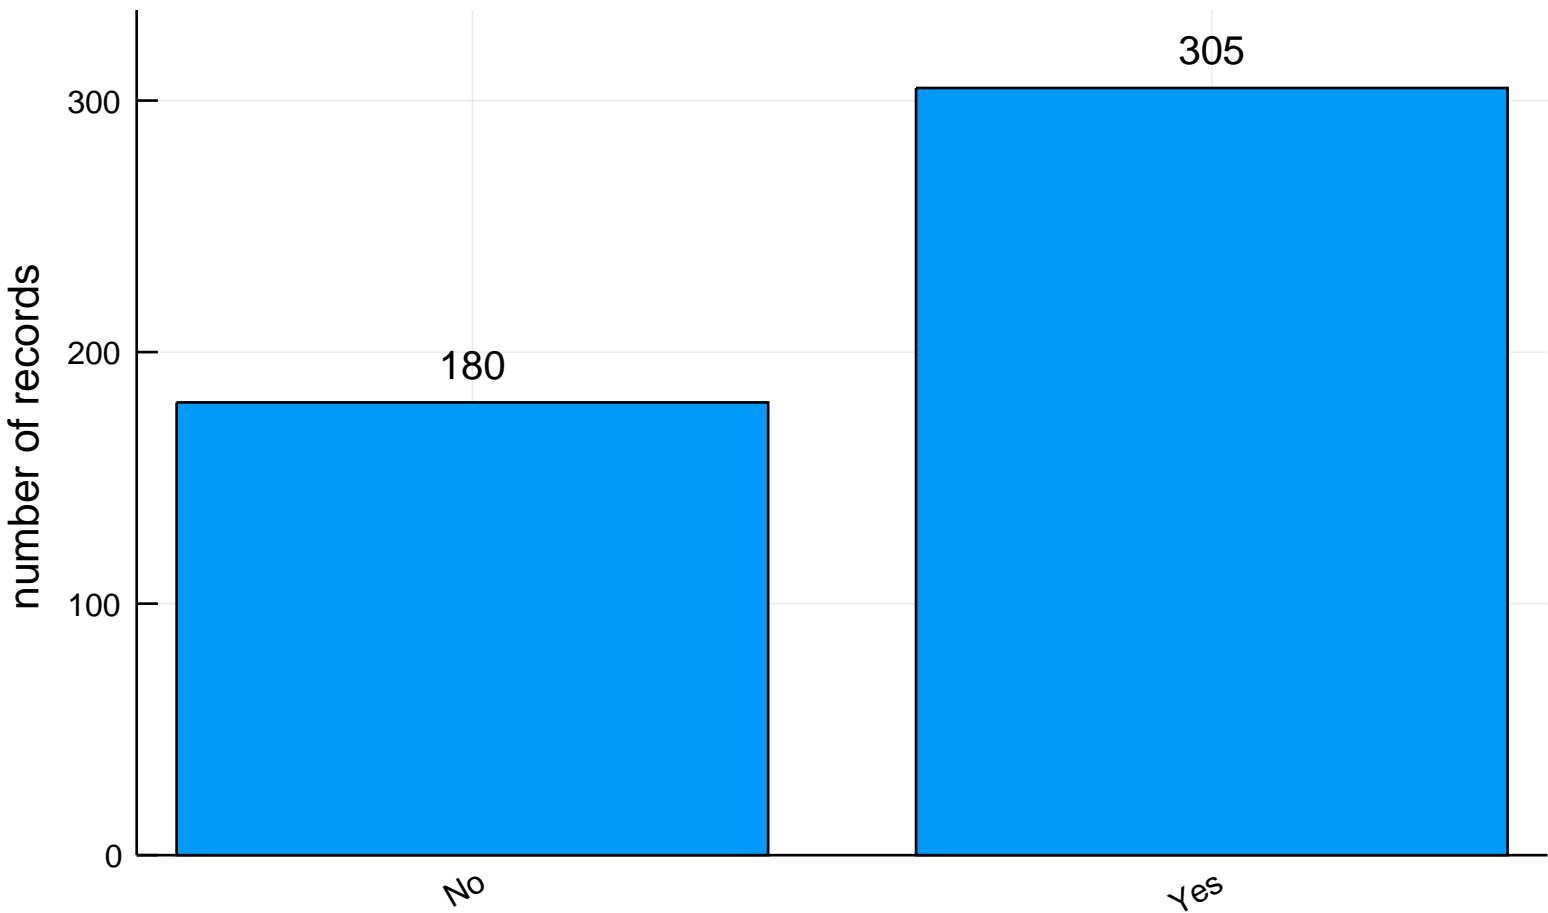

2813 NAs



# hbi (per site\_sub\_coll)

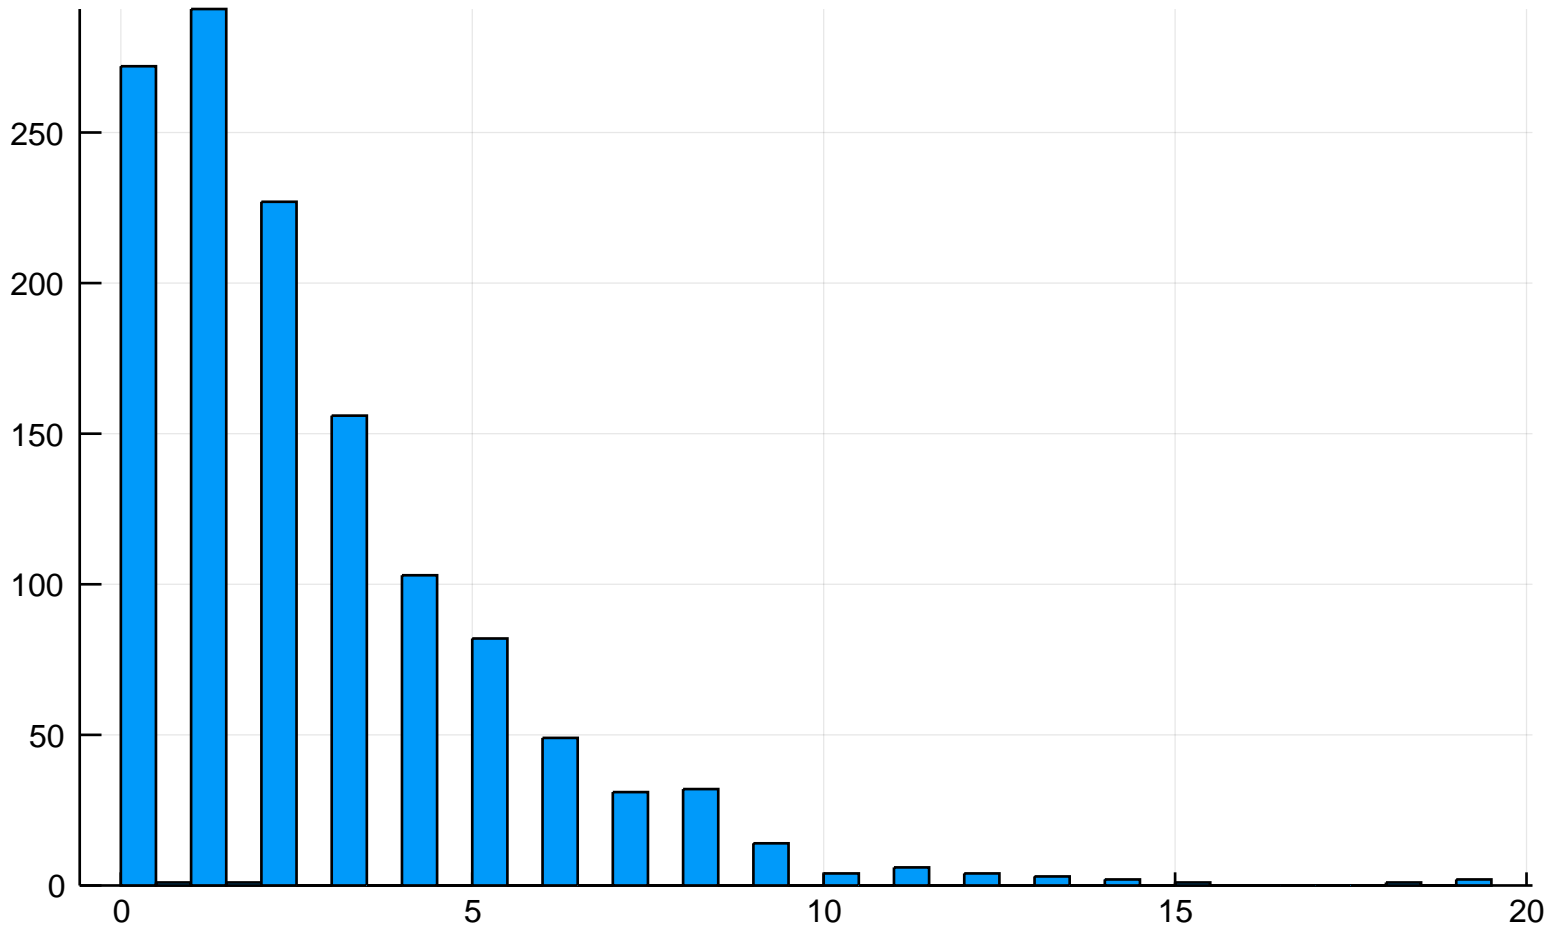

Mean: 2.51, stdev: 2.58

# Height (per Participant\_ID)

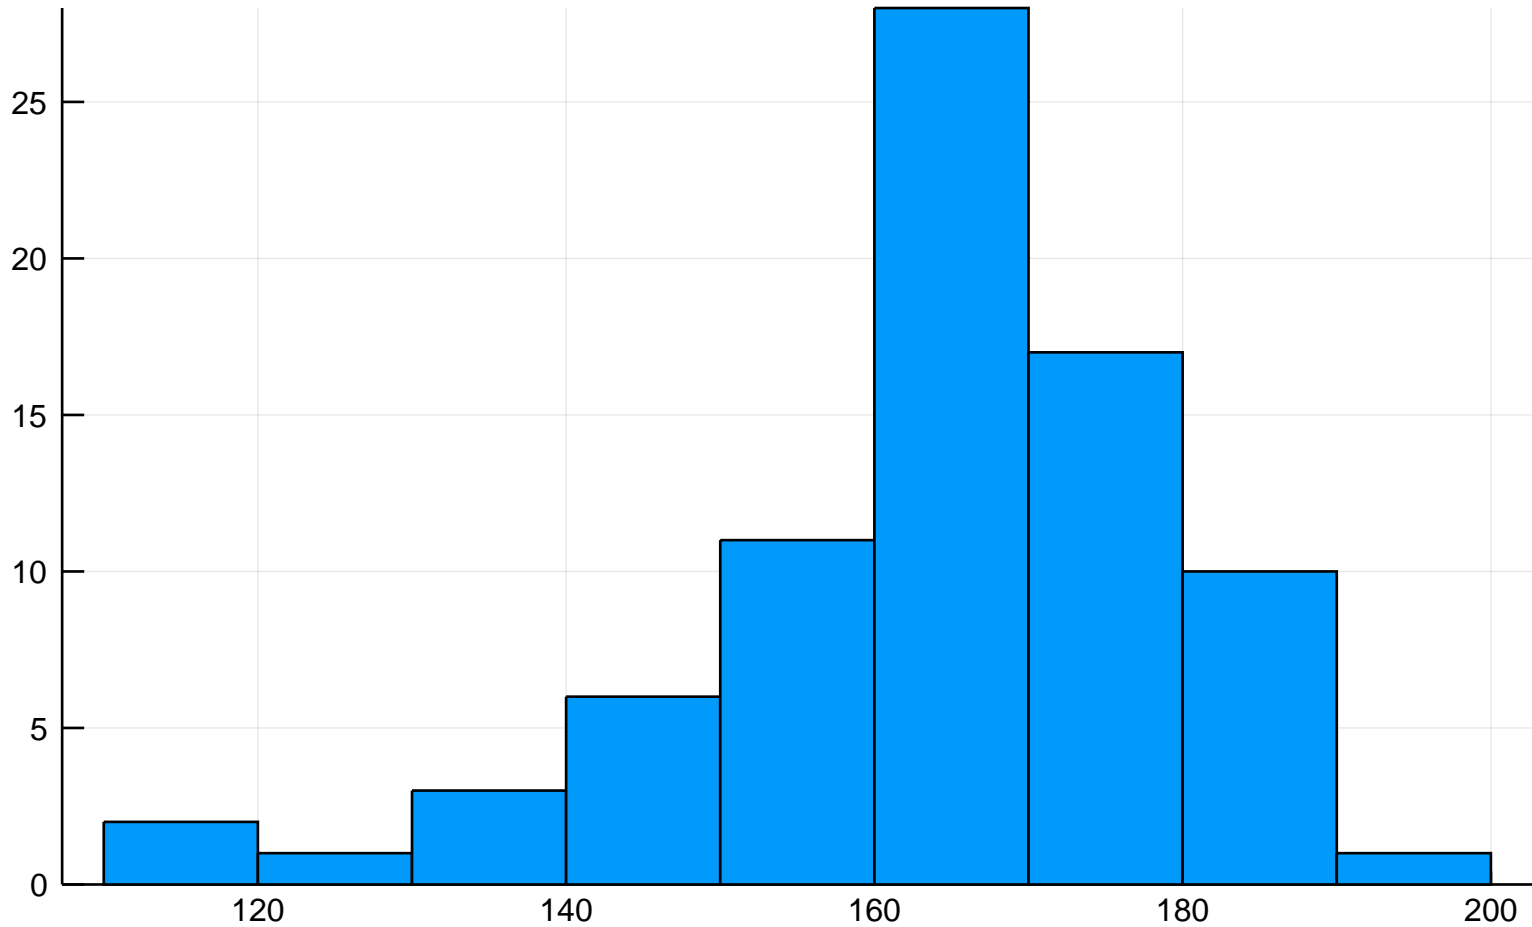

Mean: 163.51, stdev: 15.48

# Highest dose of Entocort taken mg (per site\_sub\_coll)

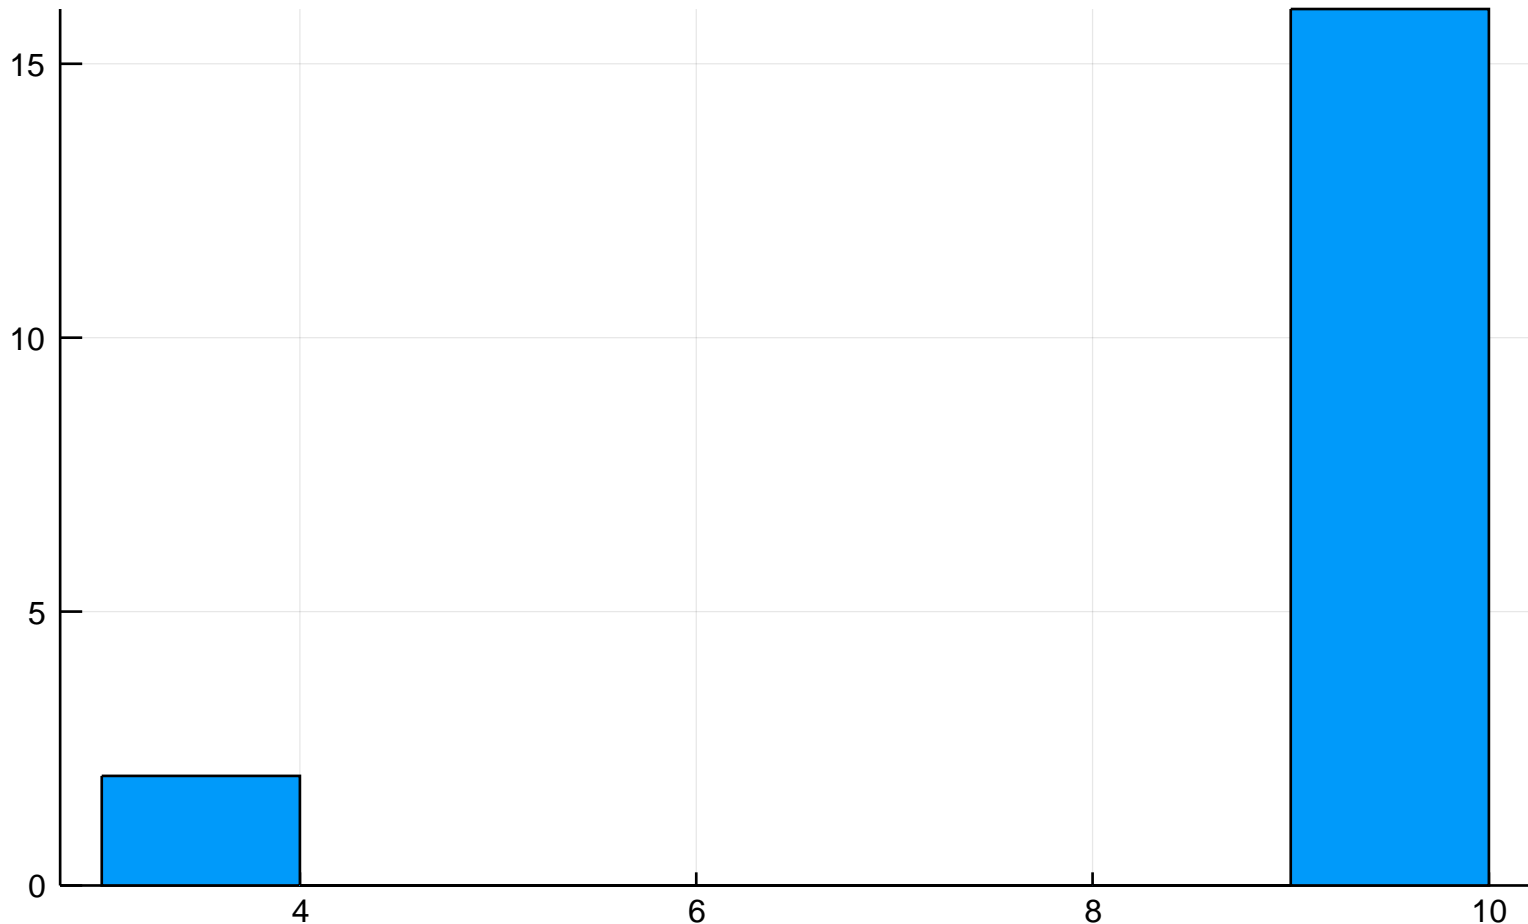

Mean: 8.33, stdev: 1.94

# Highest dose of Prednisone taken mg (per site\_sub\_coll)

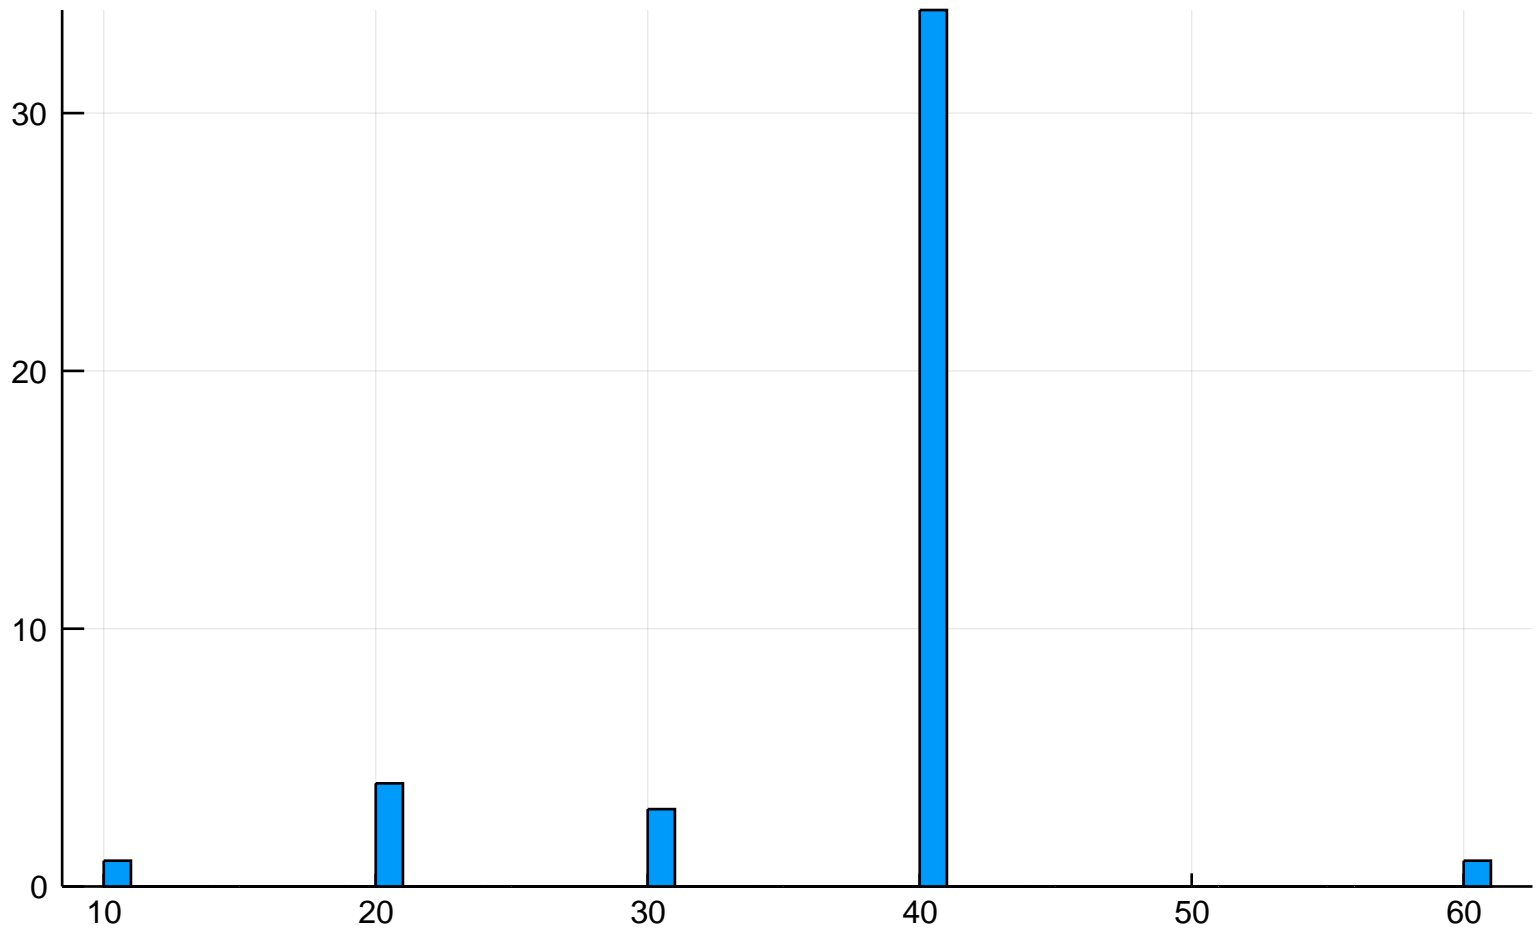

Mean: 37.21, stdev: 8.26

# Hispanic or Latino Origin (per Participant\_ID)

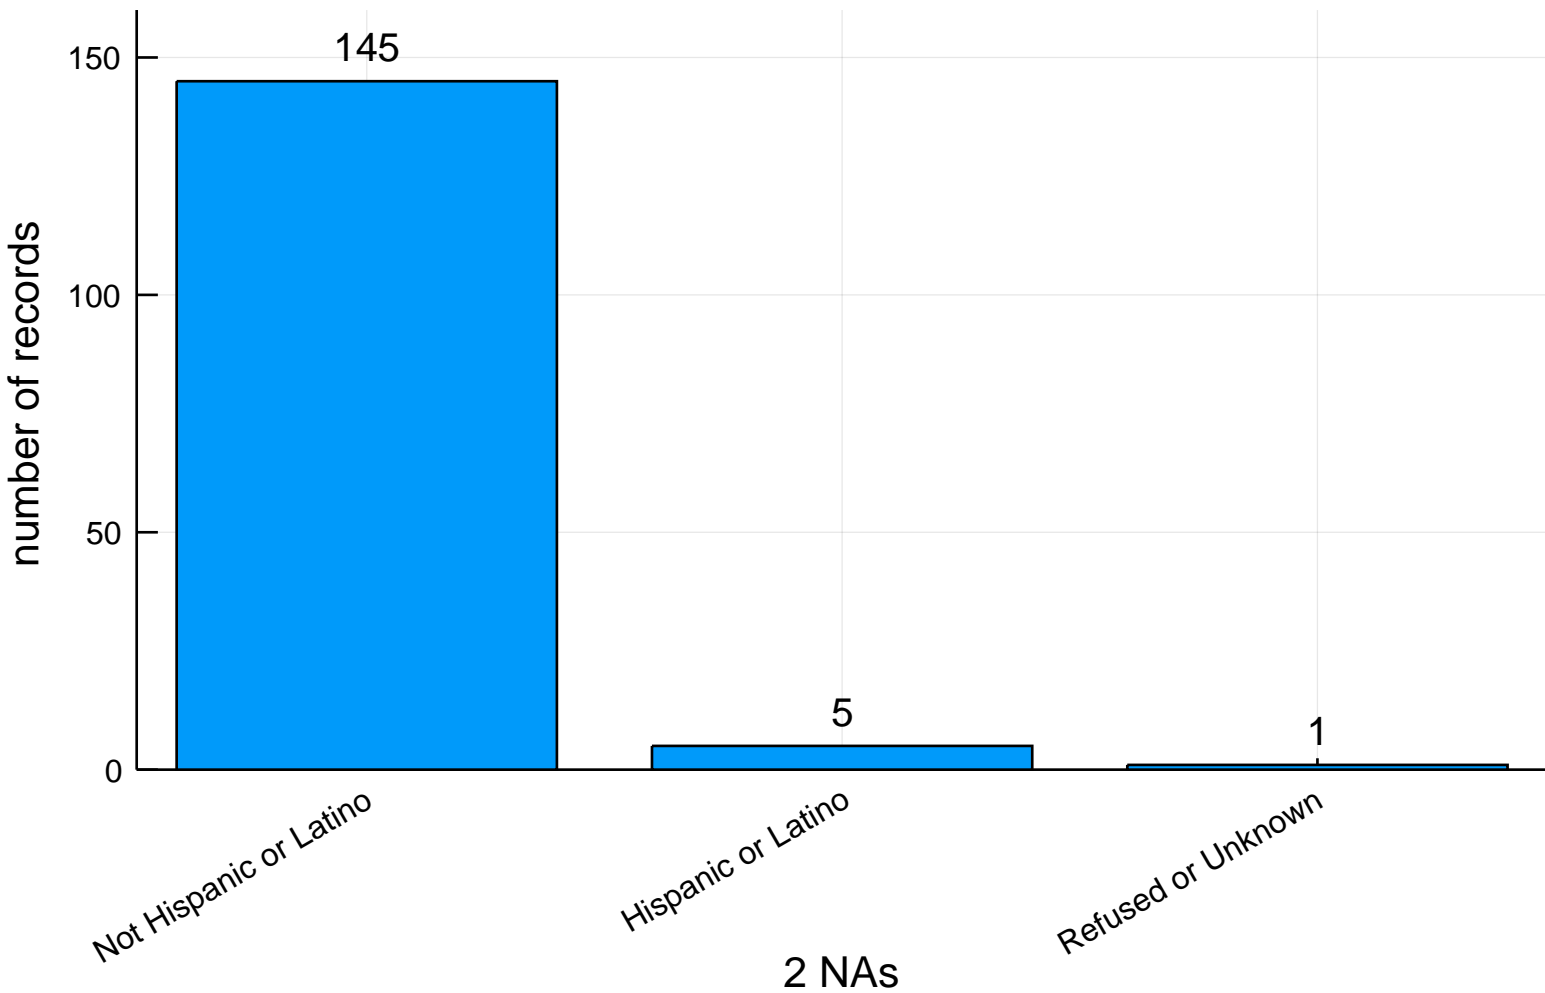

# How often do you consume alcoholic beverage (per Participant\_ID)

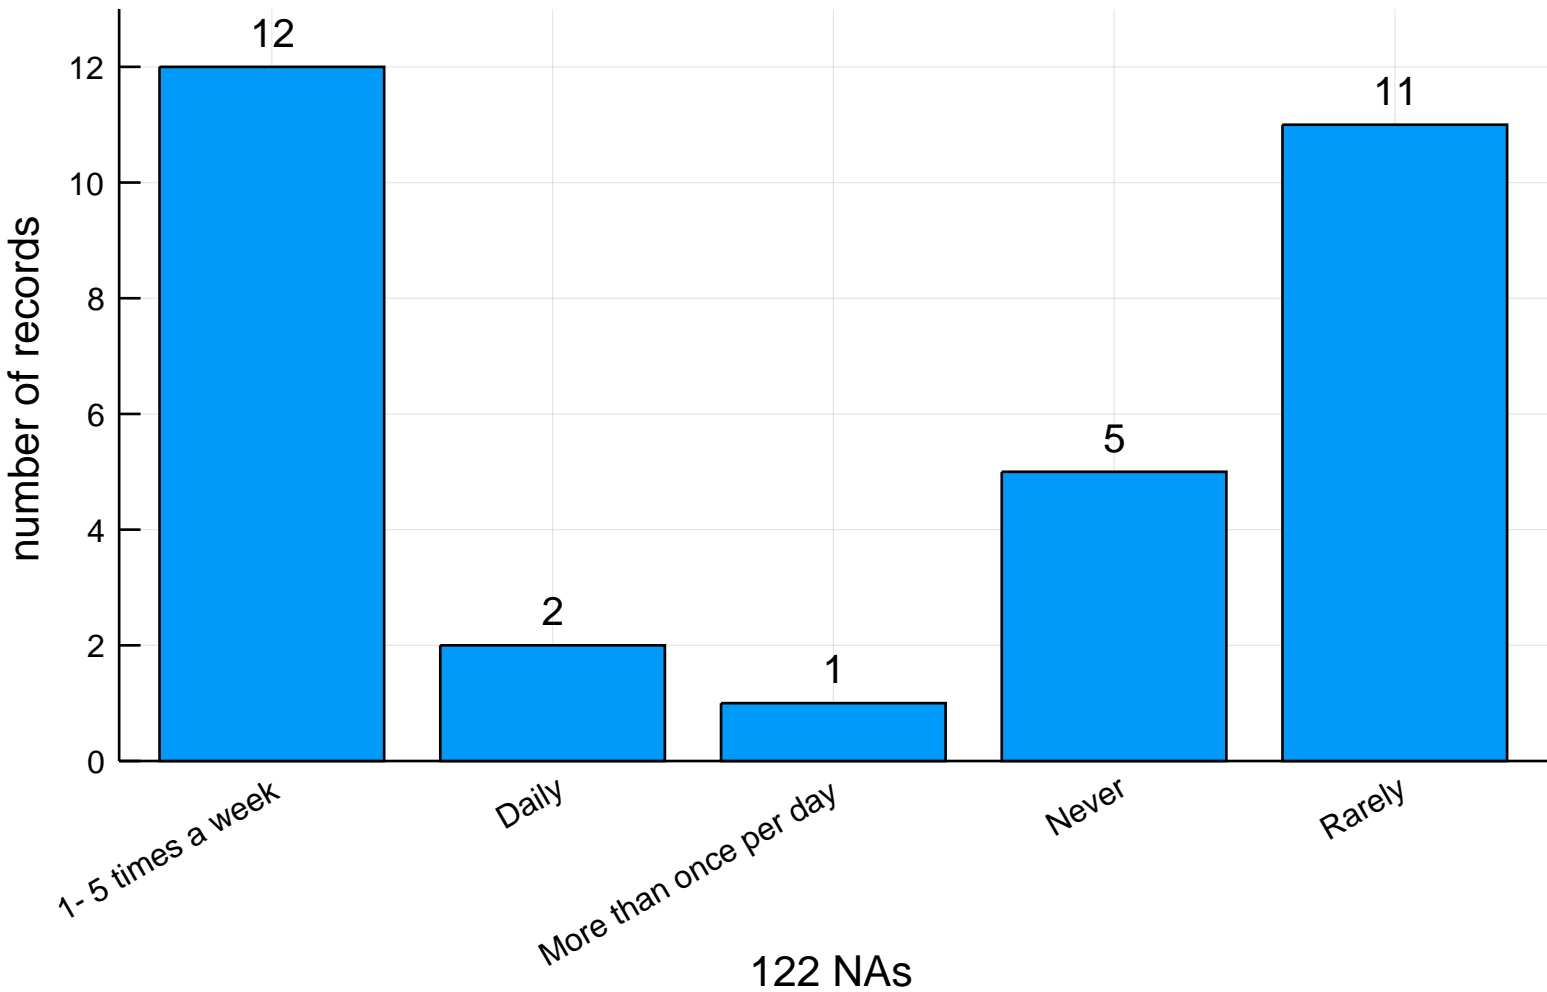

# Humira Adalimumab (per site\_sub\_coll)

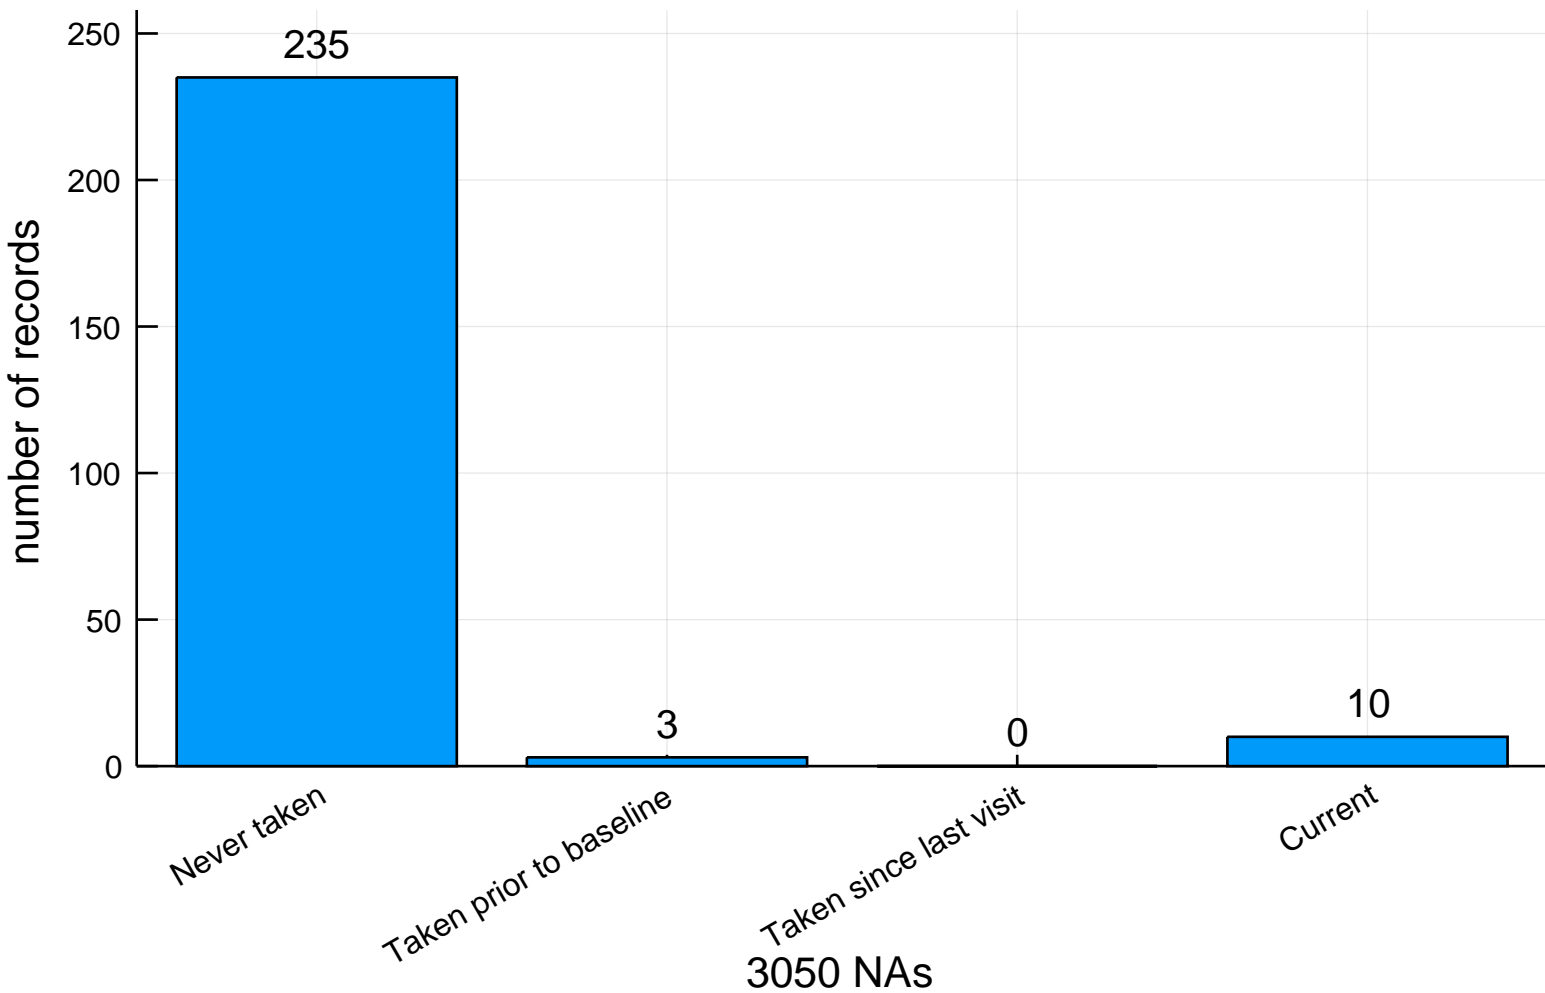

If yes for how many months have you been (per Participant\_ID)

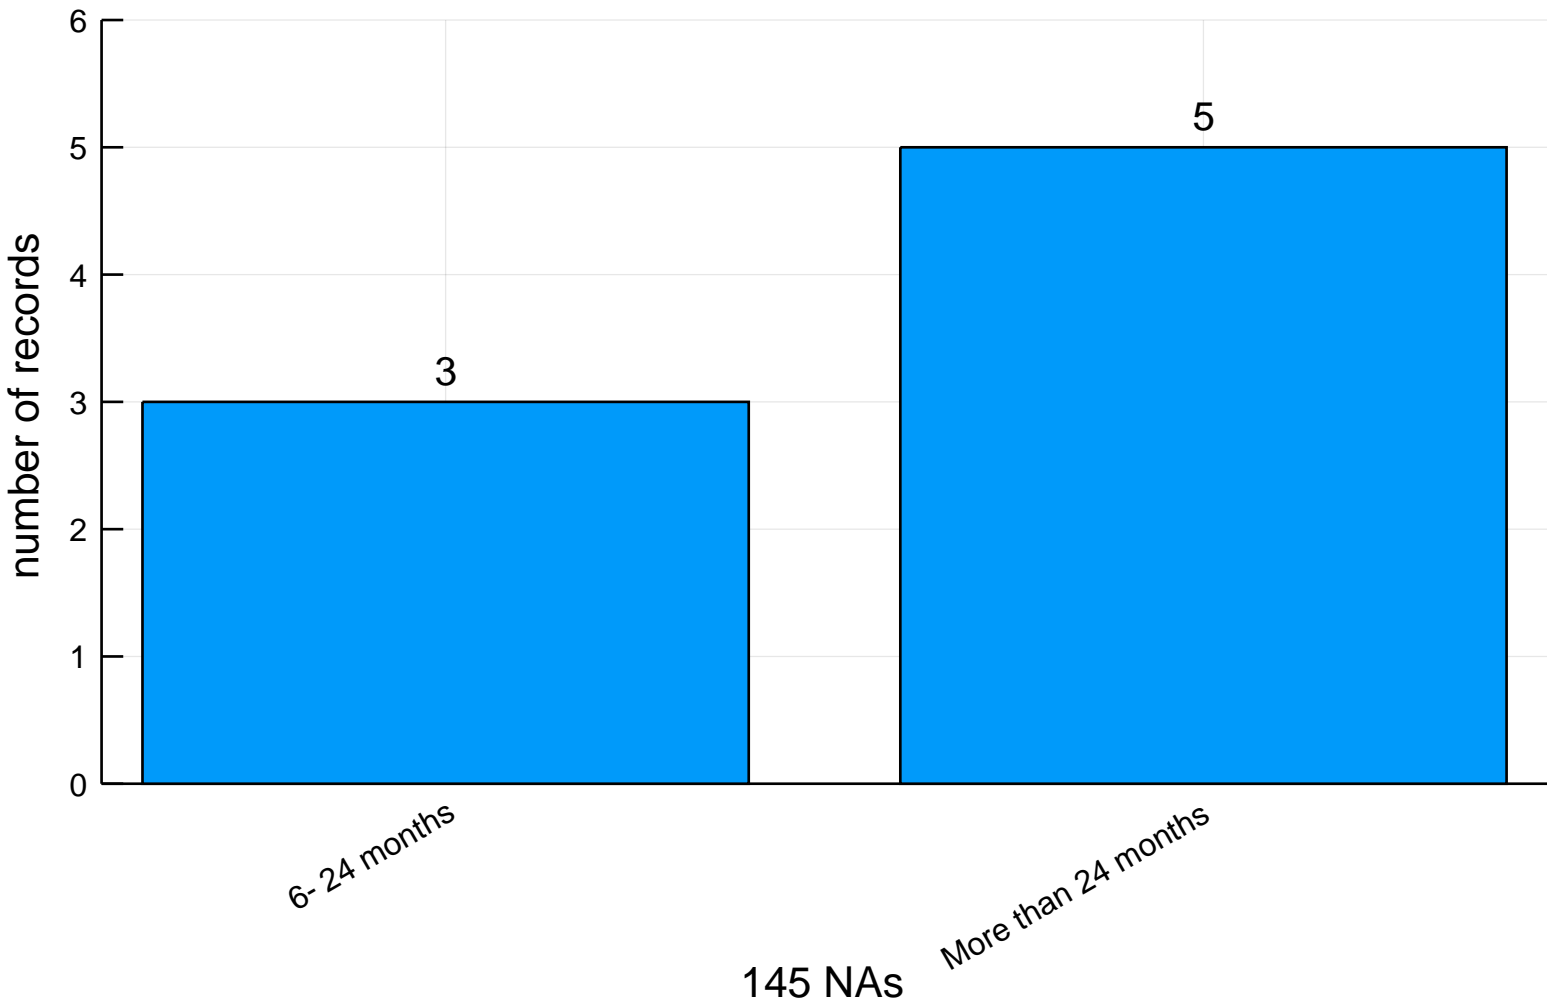



# If yes how frequently do you take them (per Participant\_ID)

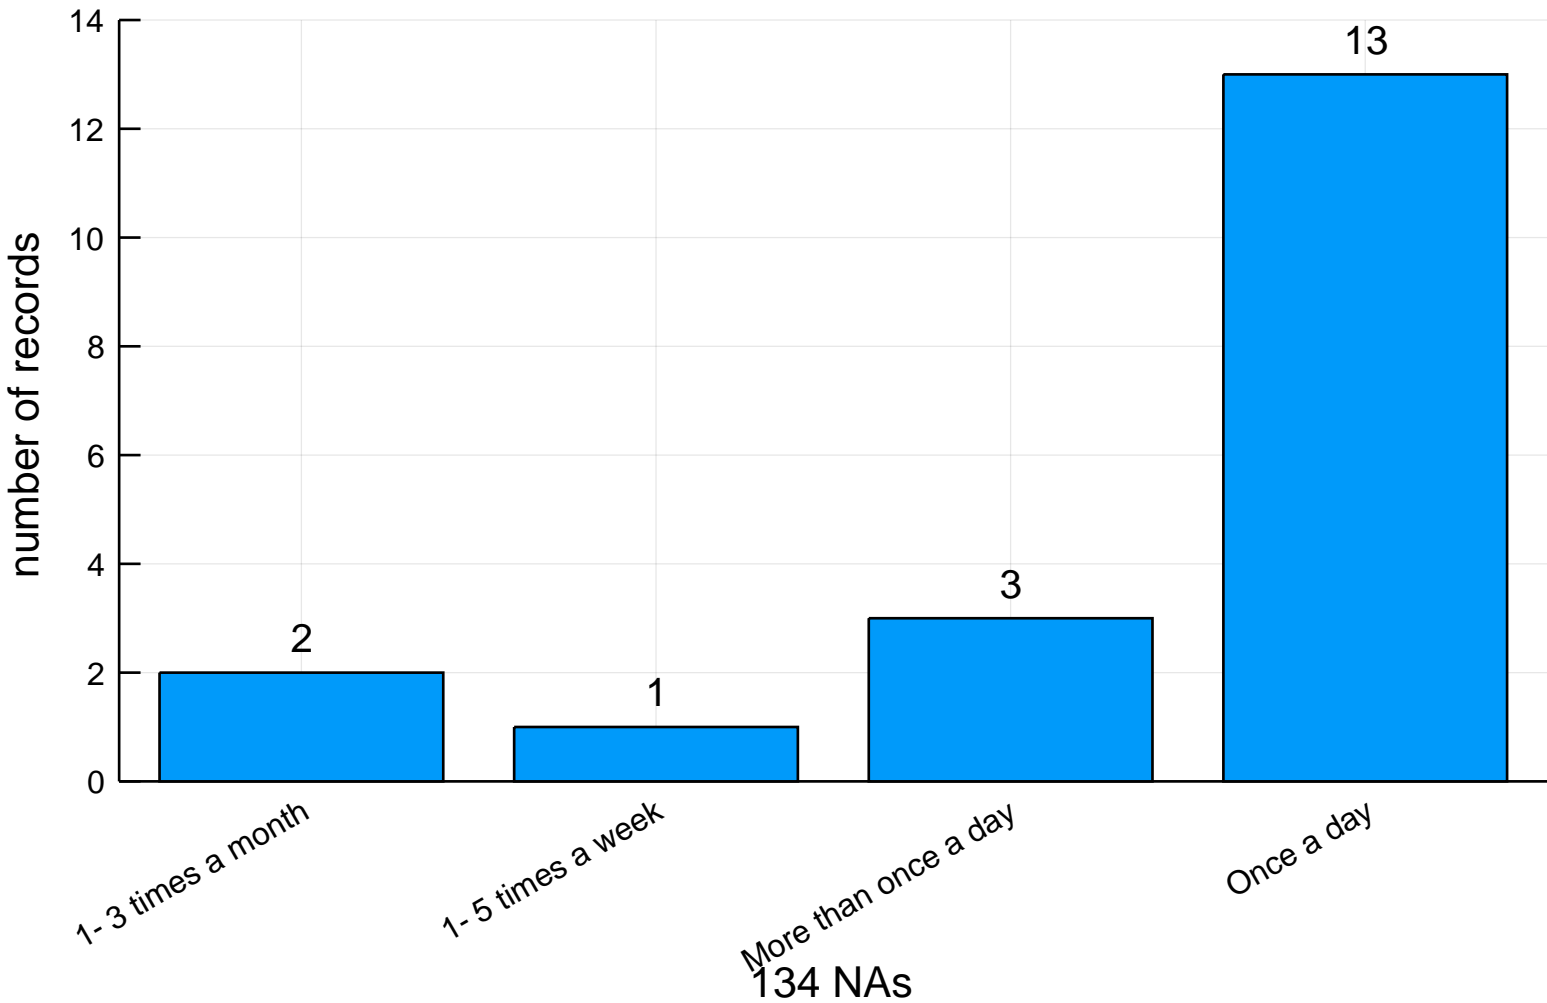

If yes how frequently do you take them (per Participant\_ID)

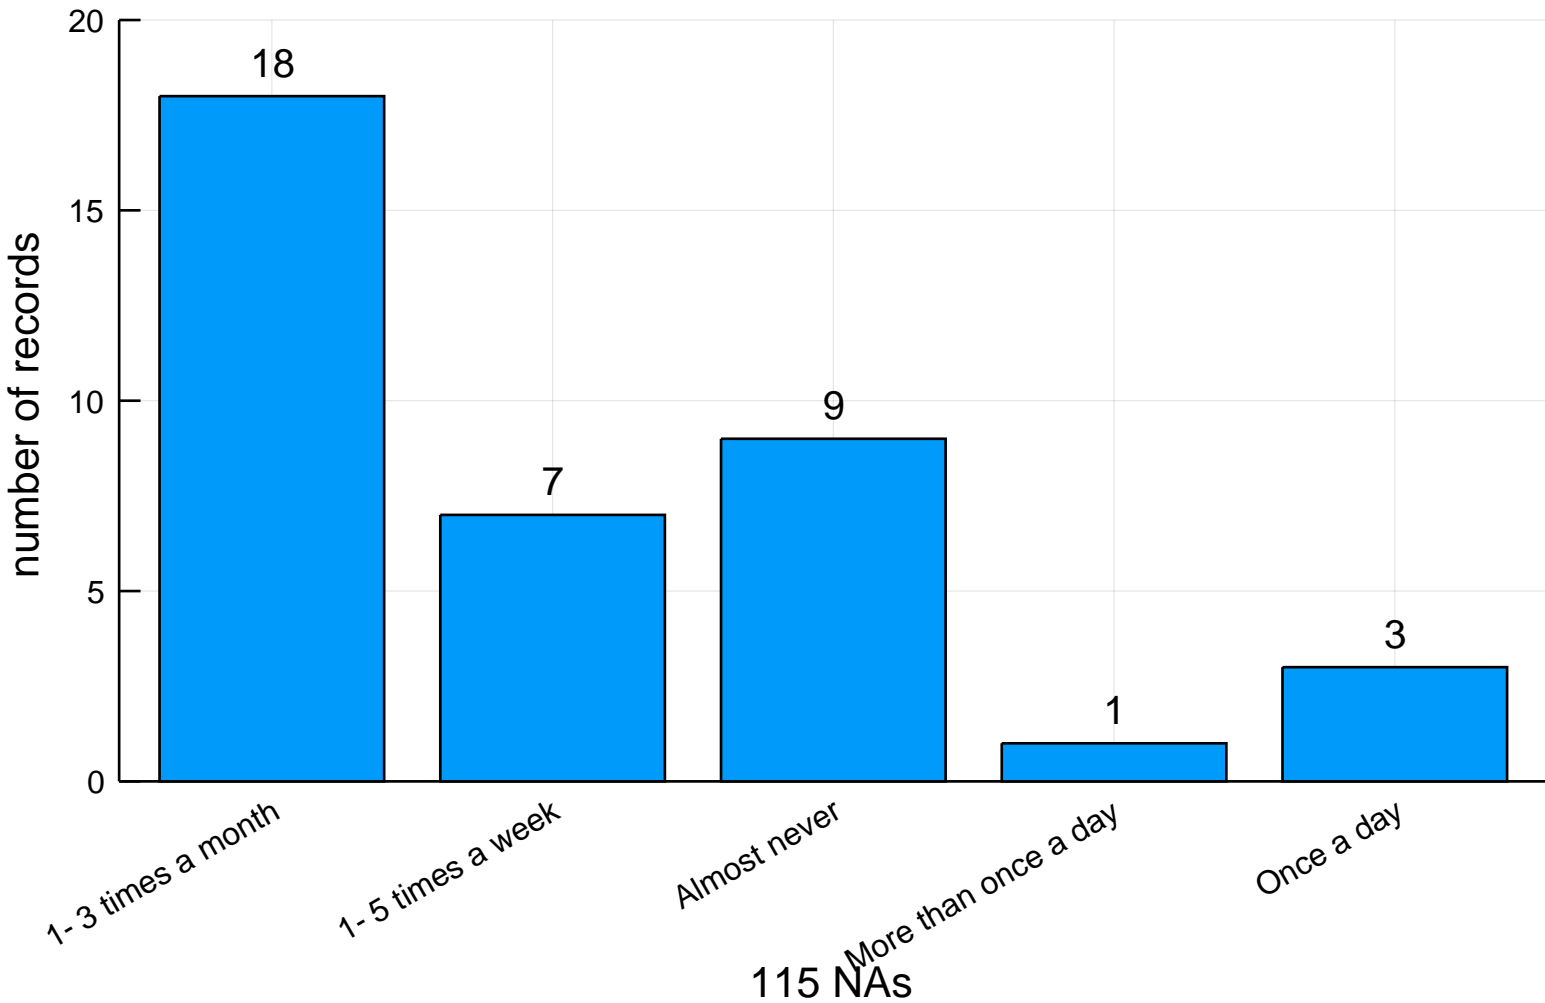

If you are female do you use hormonal co (per Participant\_ID)

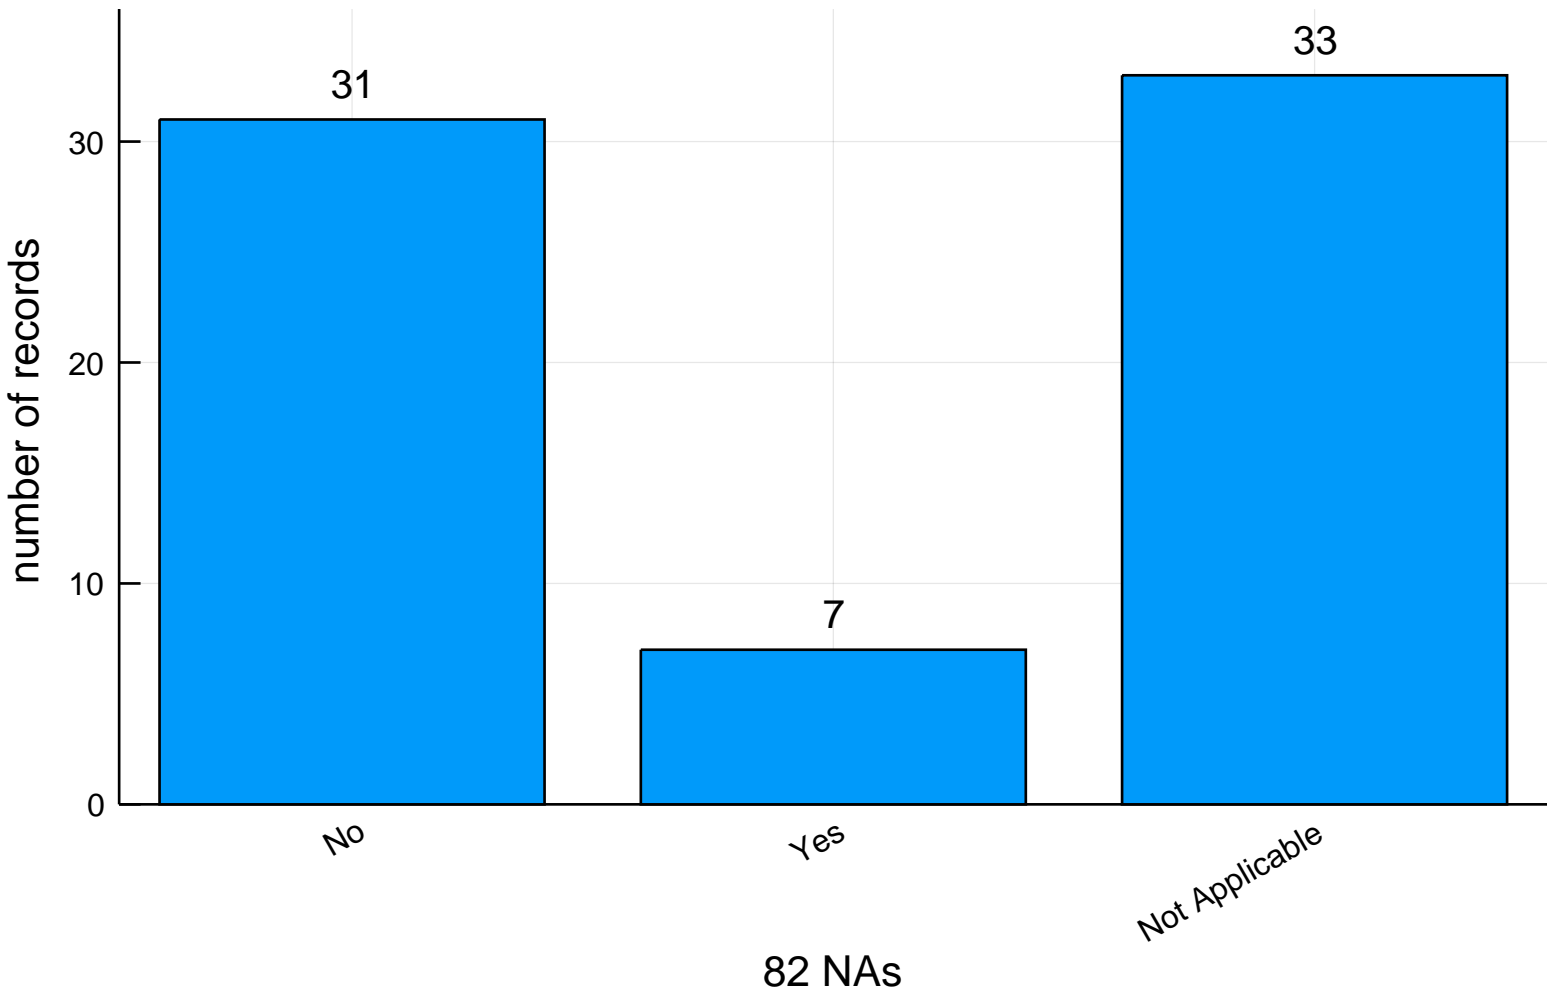

# Ileum (per site\_sub\_coll)

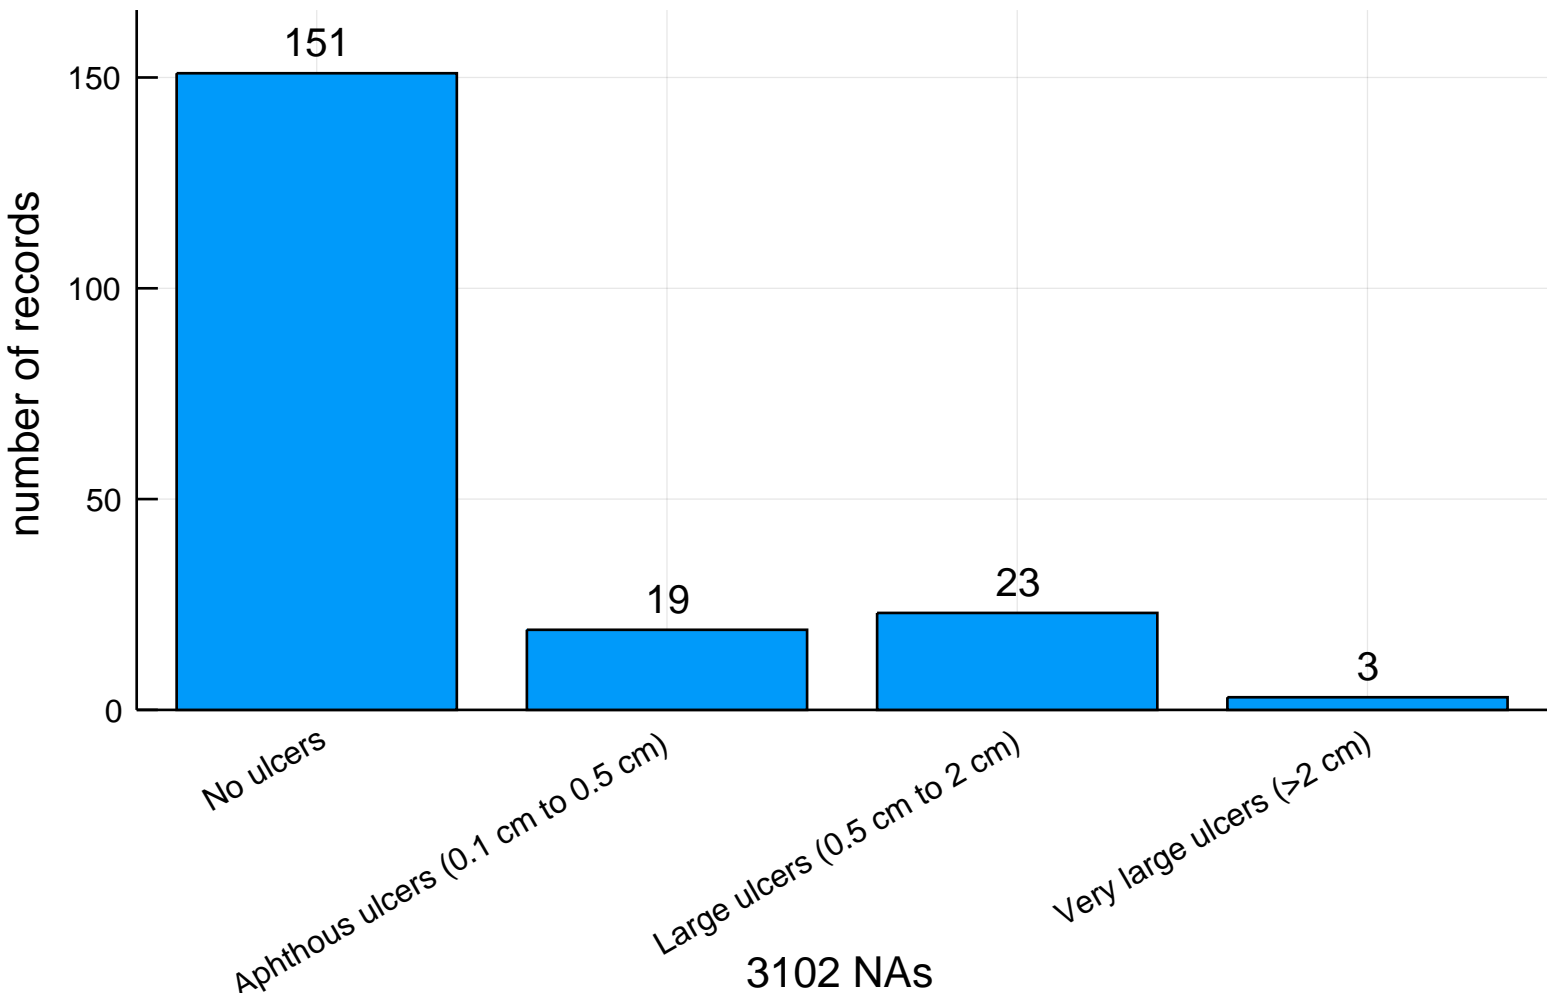

# Ileum 1 (per site\_sub\_coll)

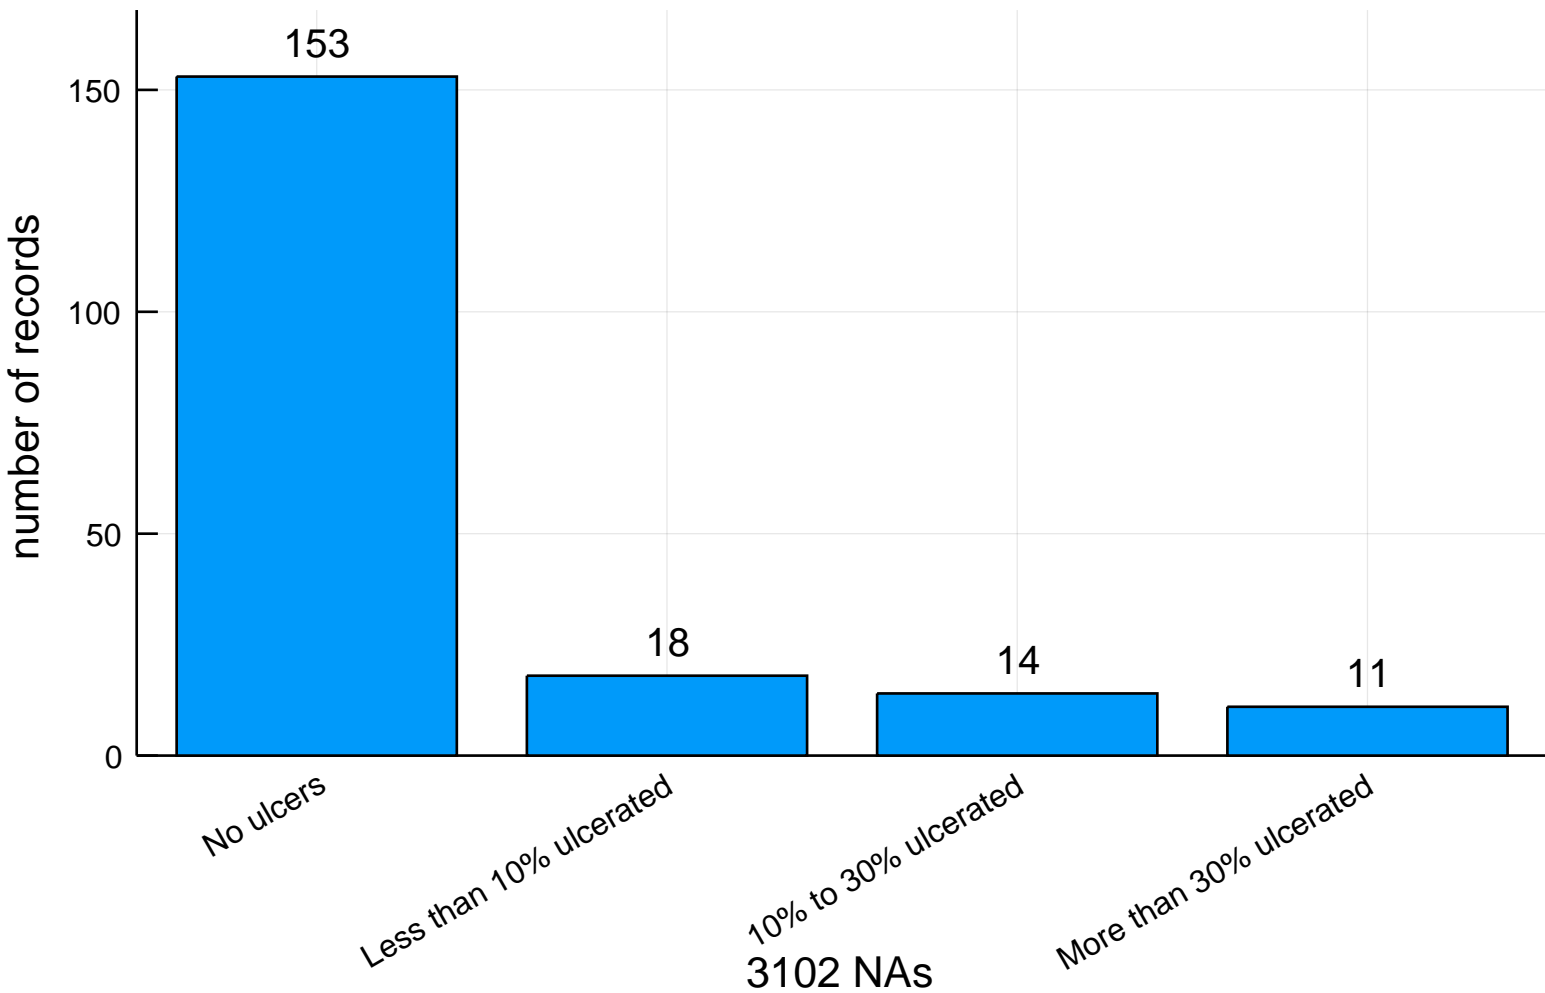

# Ileum 3 (per site\_sub\_coll)

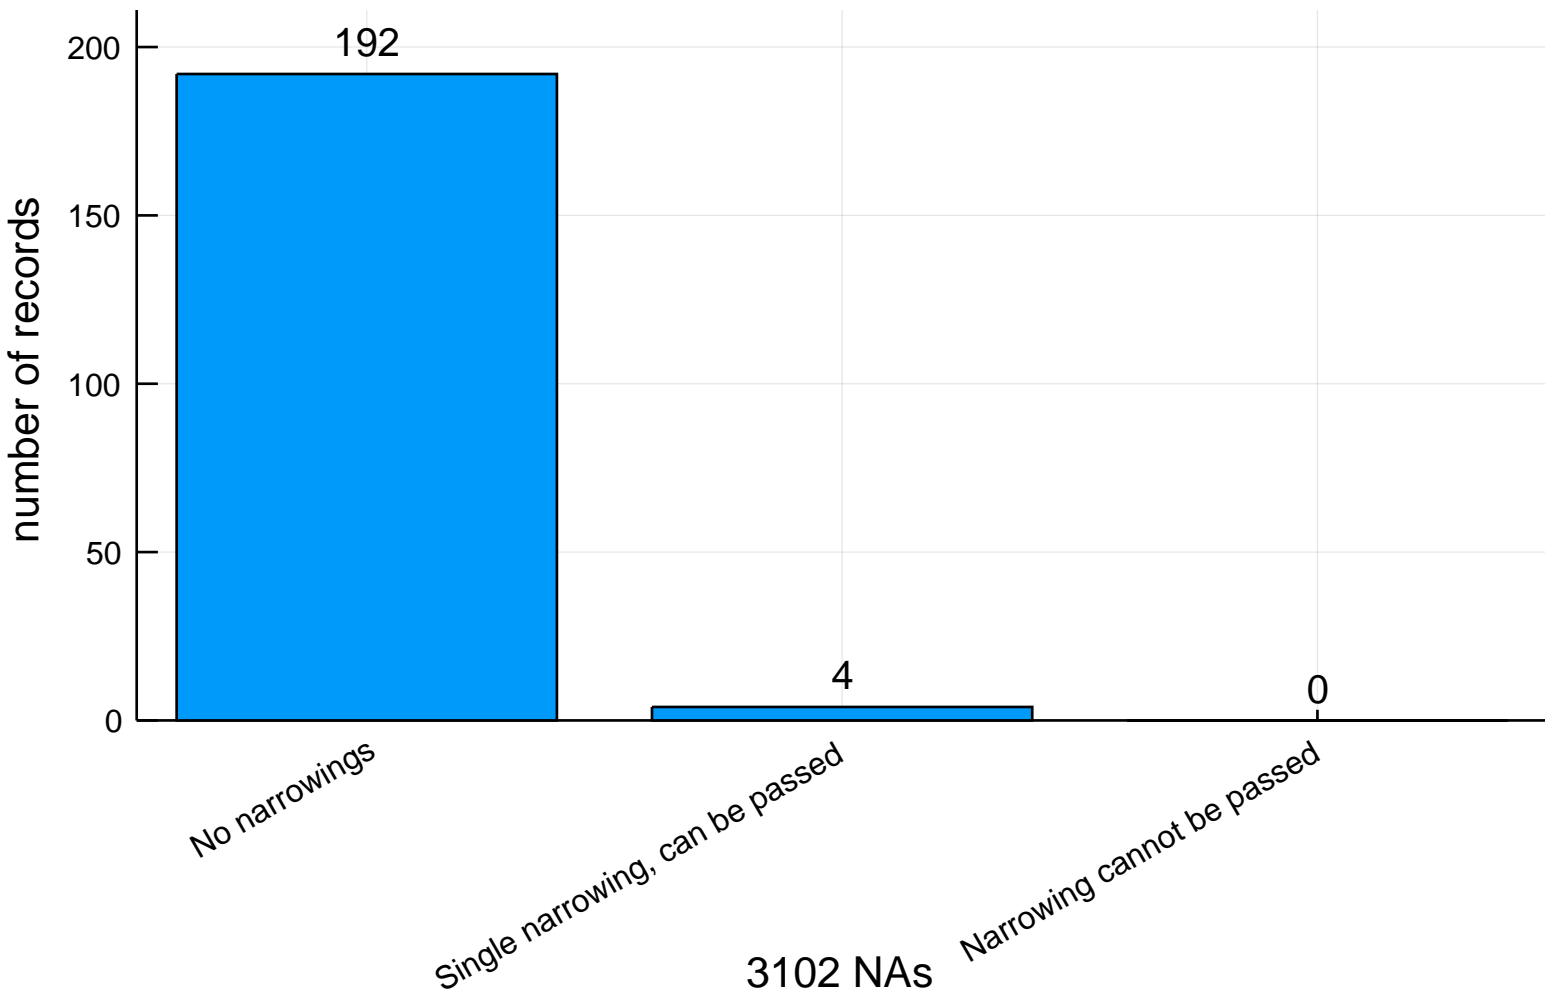

# Ileum cell biopsy (per Participant\_ID)

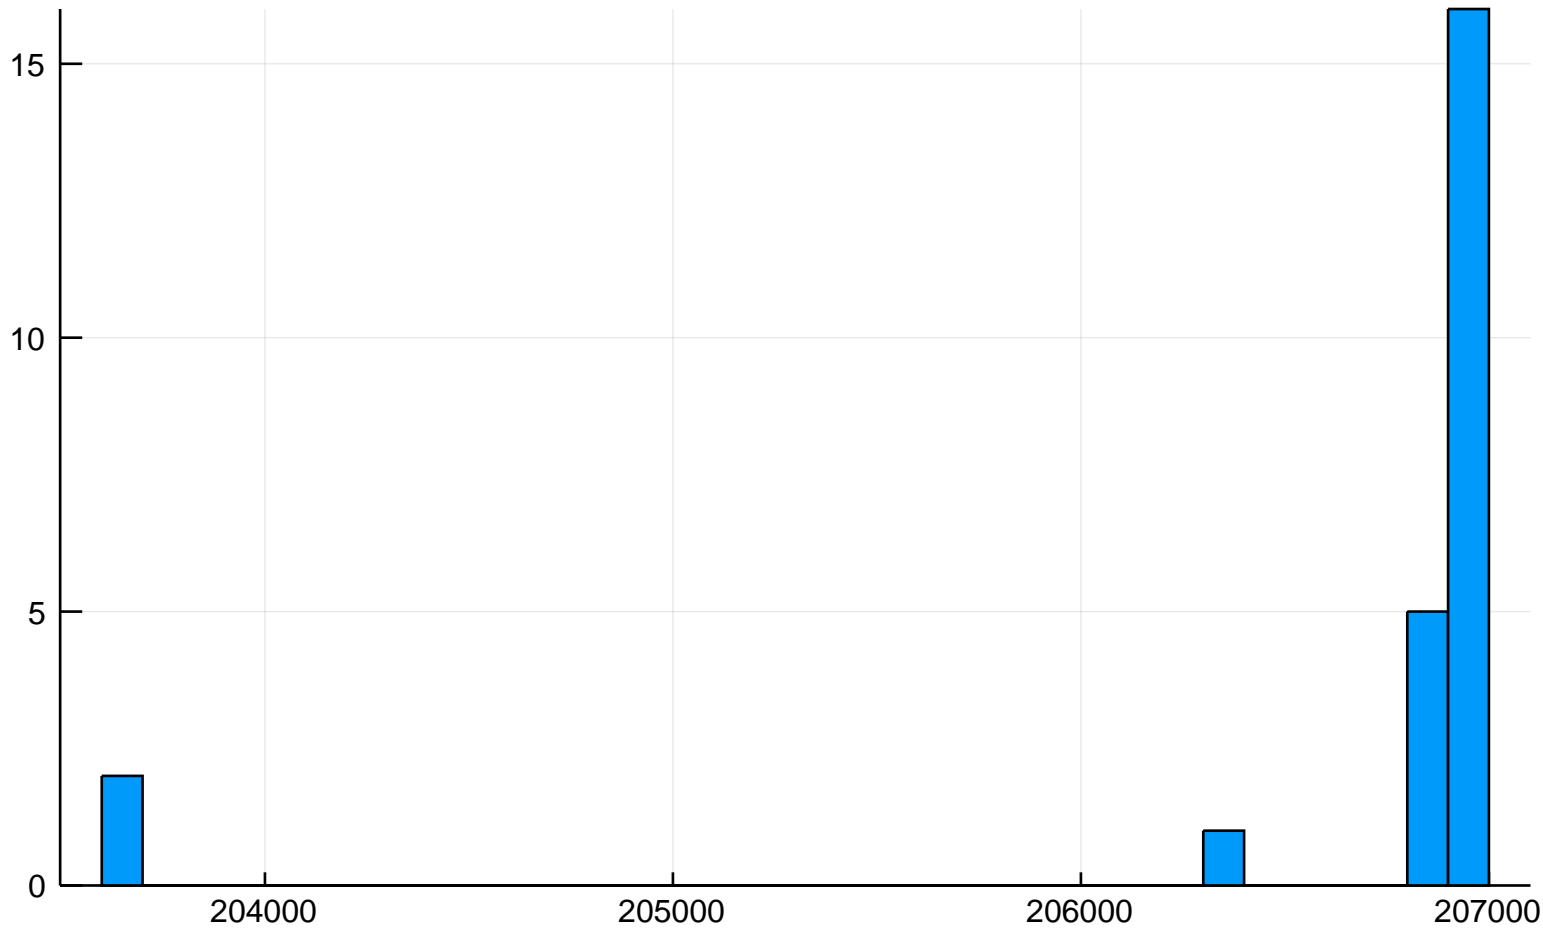

Mean: 206640.71, stdev: 926.37

# Ileum flora (per site\_sub\_coll)

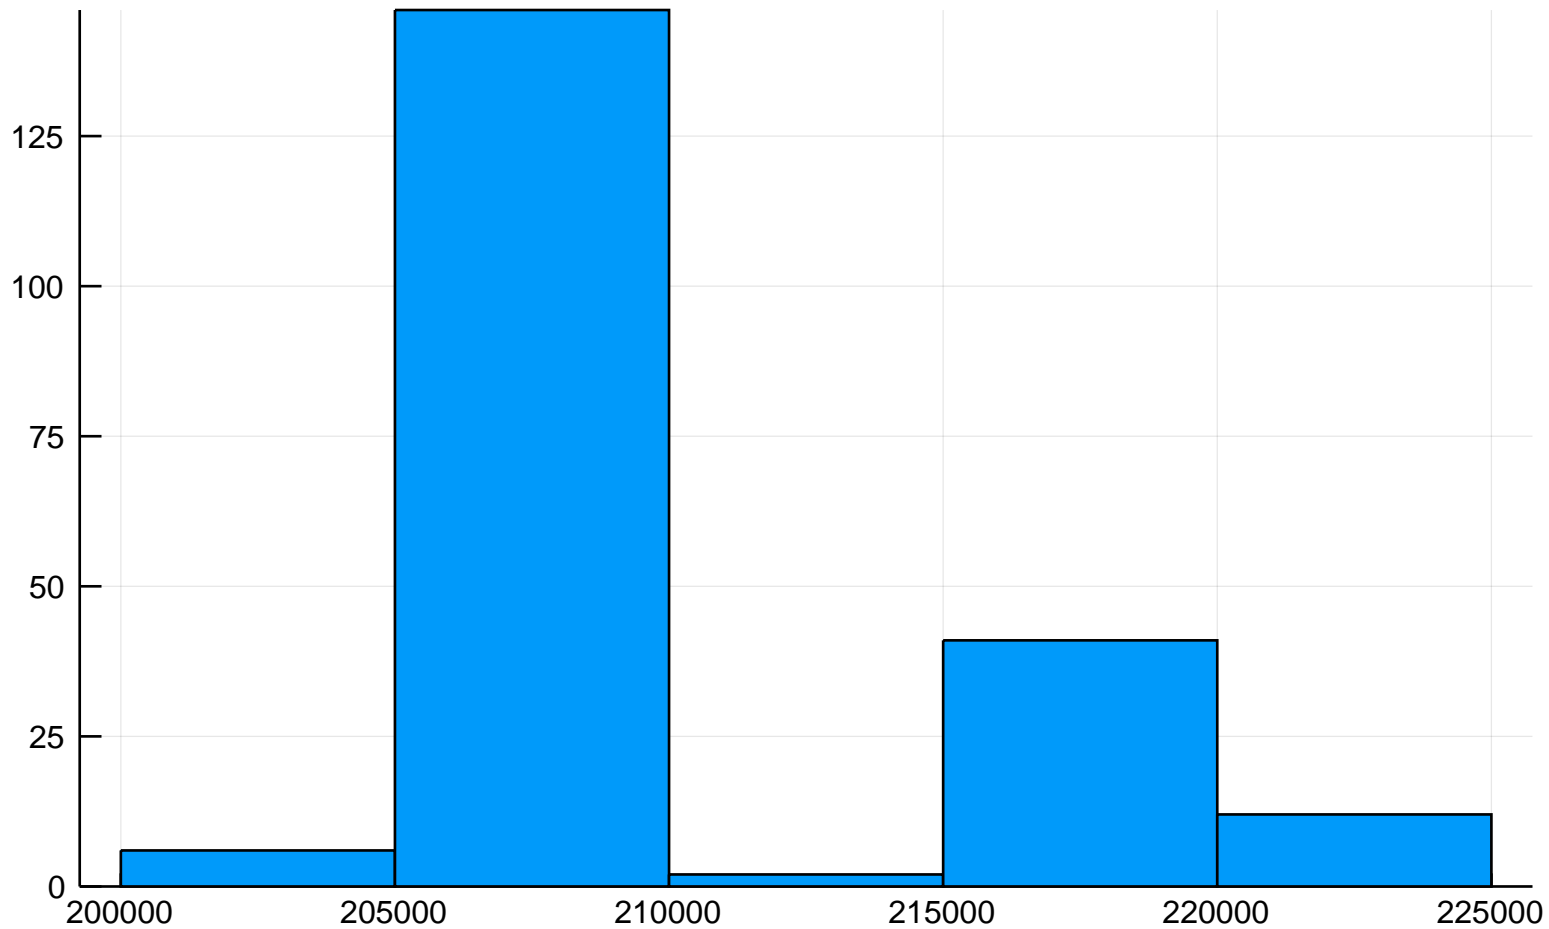

Mean: 209760.52, stdev: 5894.13



# Immunosuppressants e g oral corticostero (per site\_sub\_col)

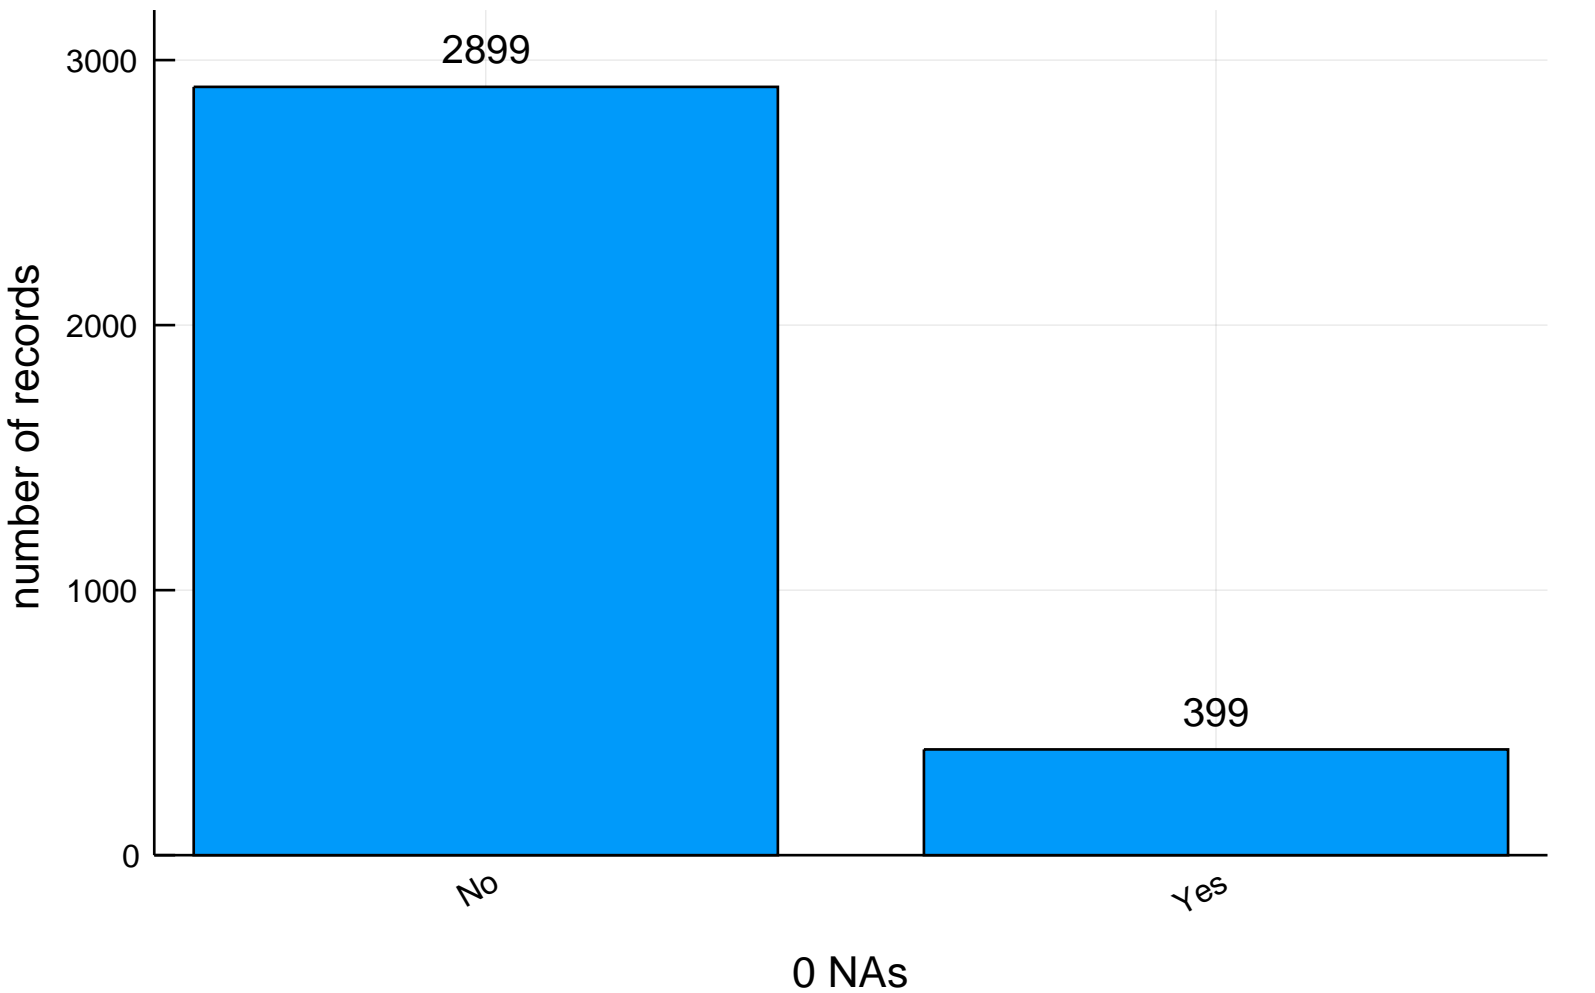

# Imodium (per site\_sub\_coll)

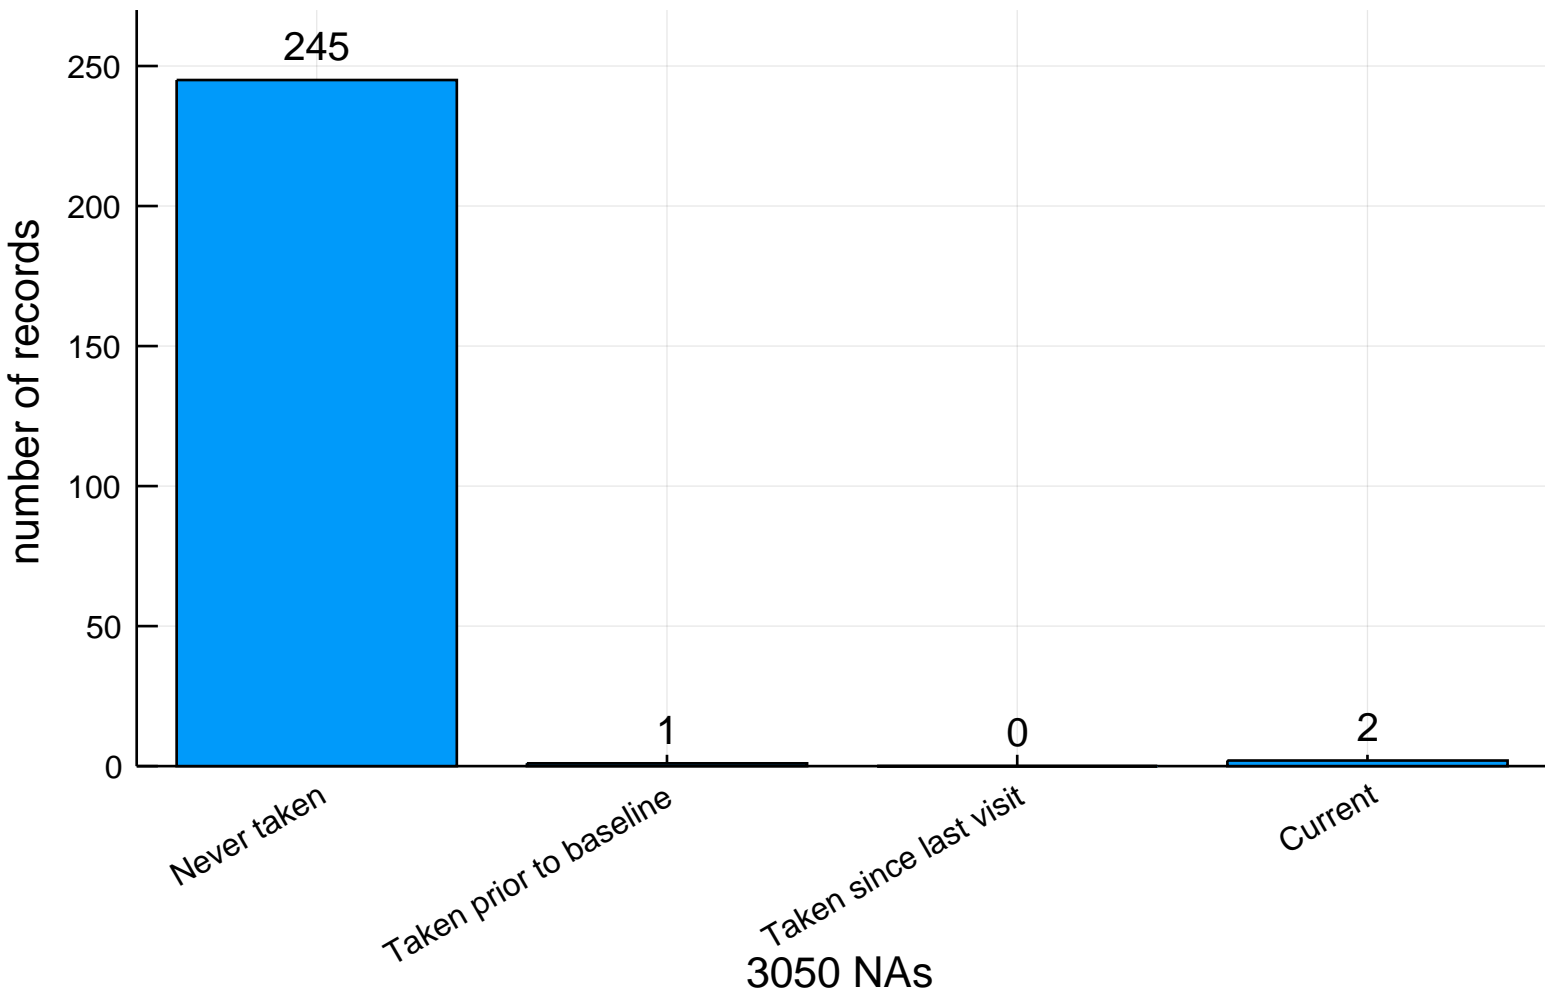

# IntervalSequence (per row)

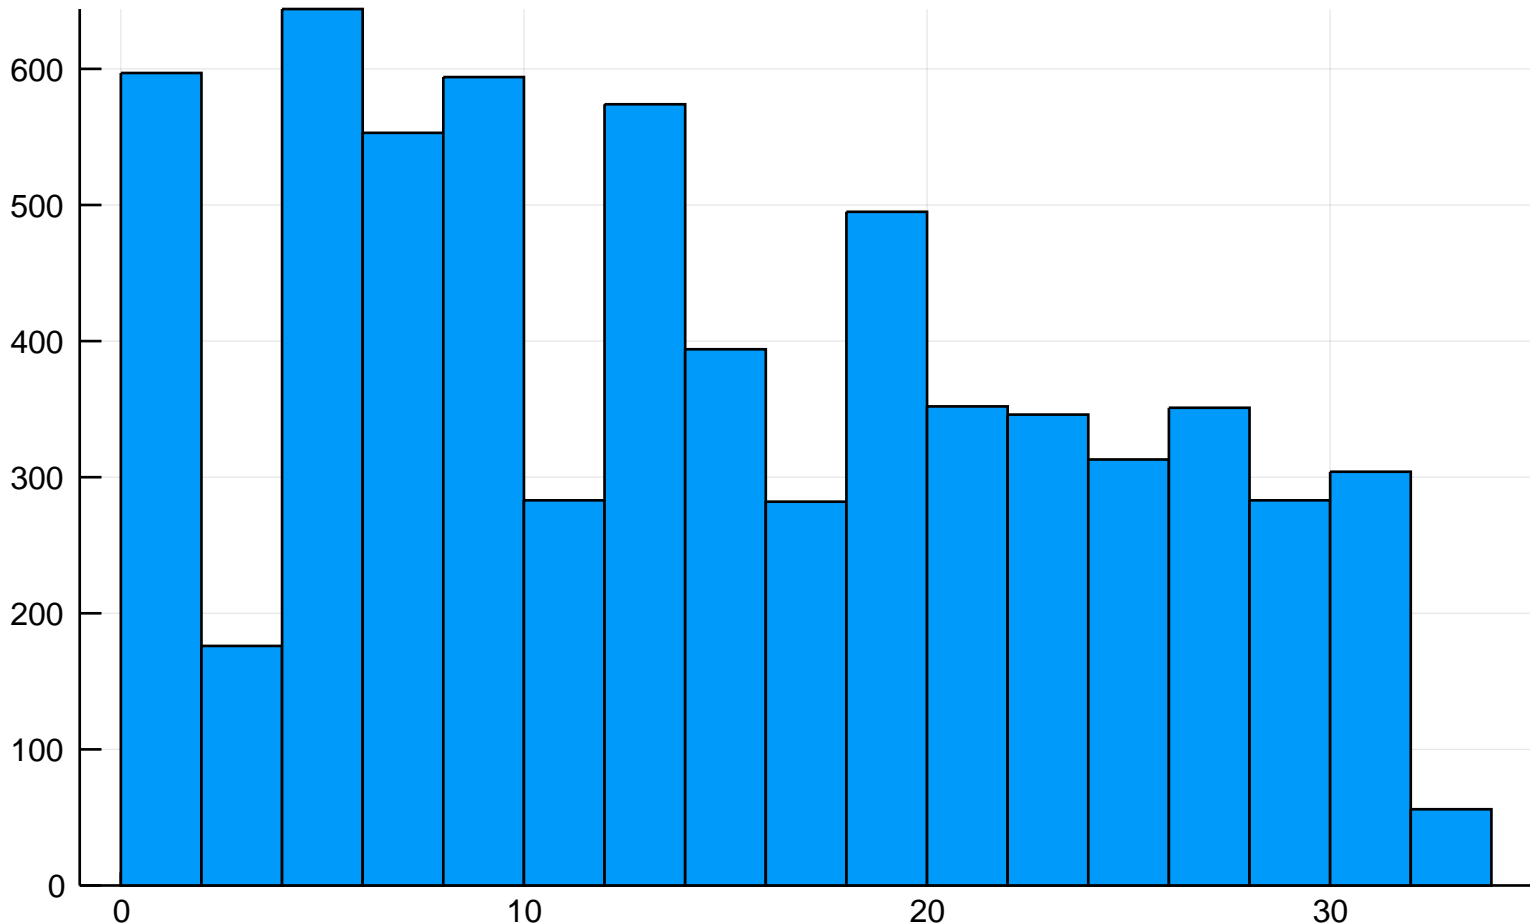

Mean: 14.17, stdev: 9.04

# interval days (per site\_sub\_coll)

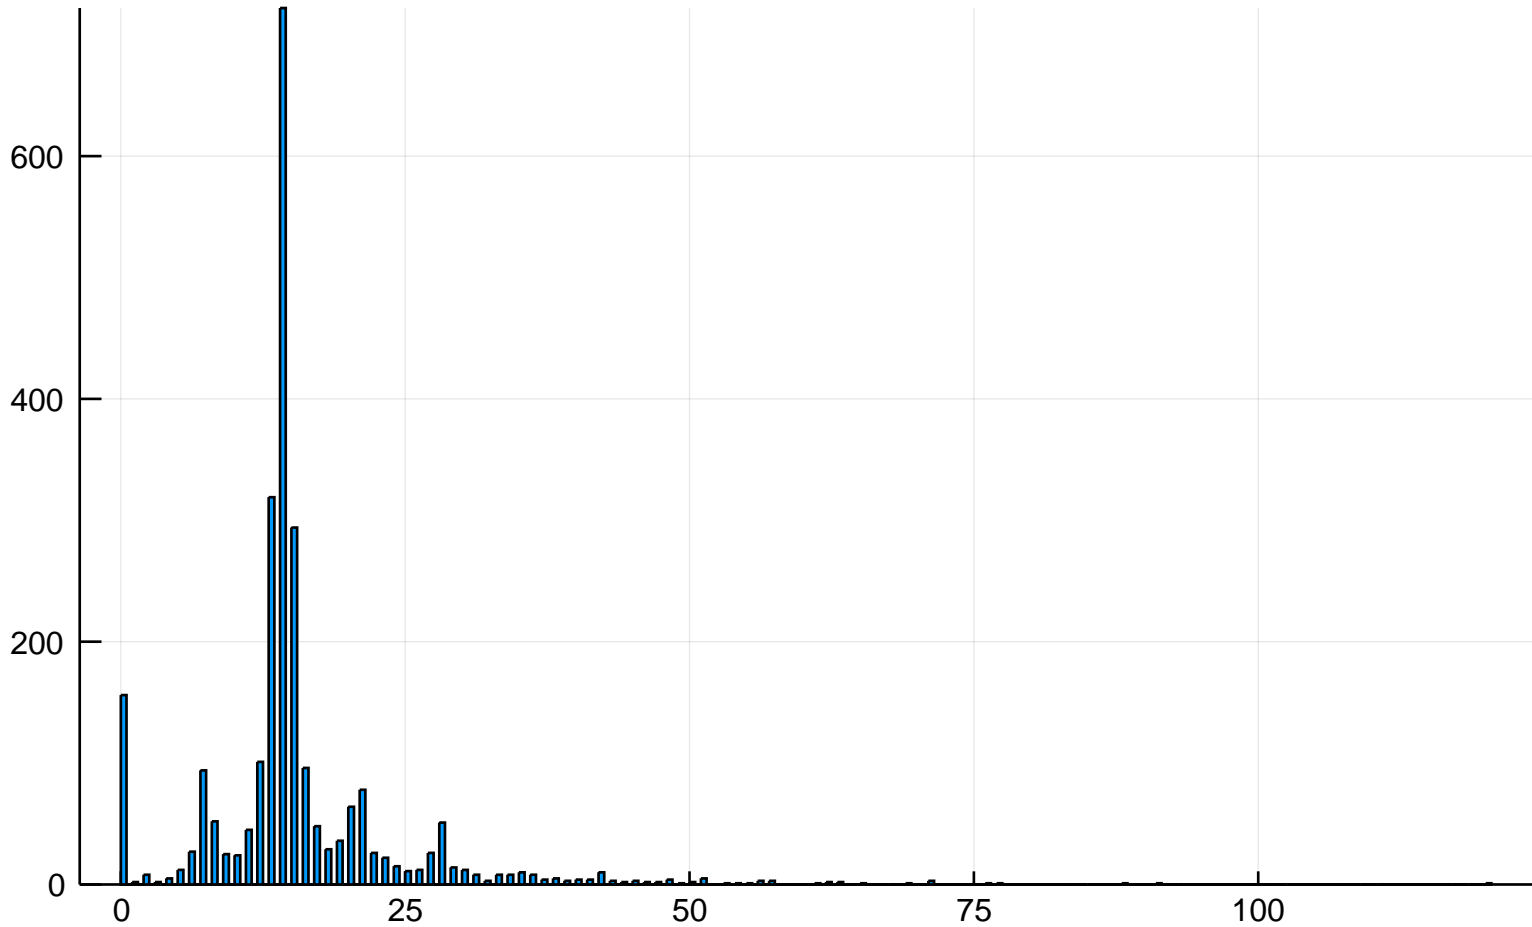

Mean: 15.3, stdev: 9.18

In the past 2 months have you used any a (per Participant\_ID

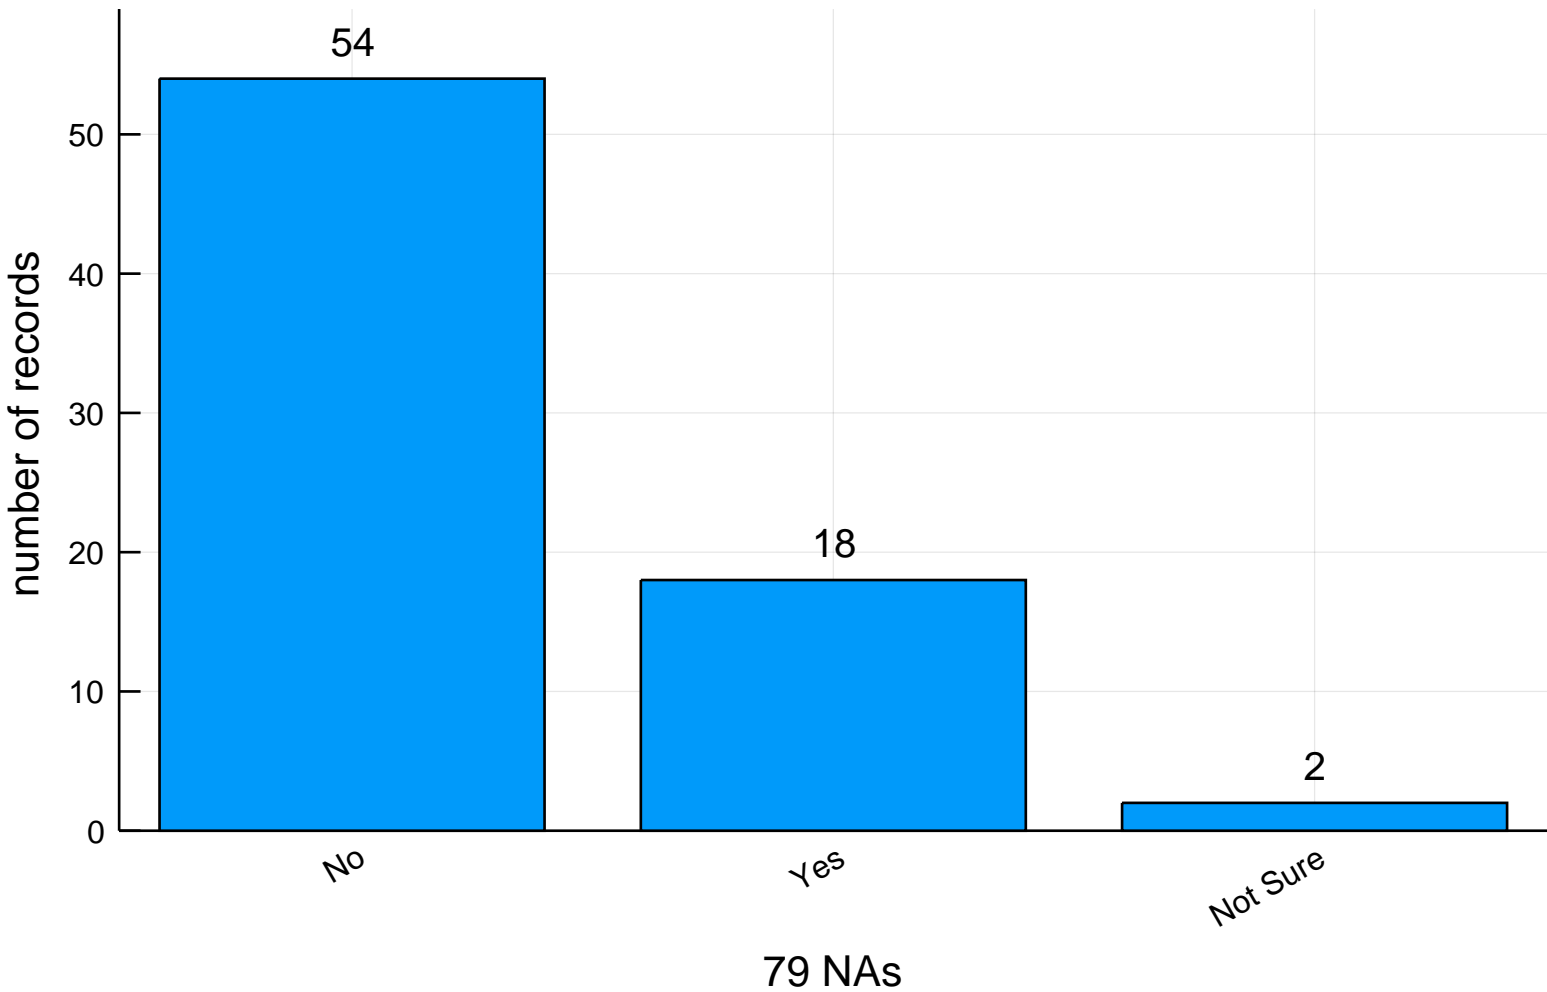

In the past 2 months have you used any m (per Participant\_ID

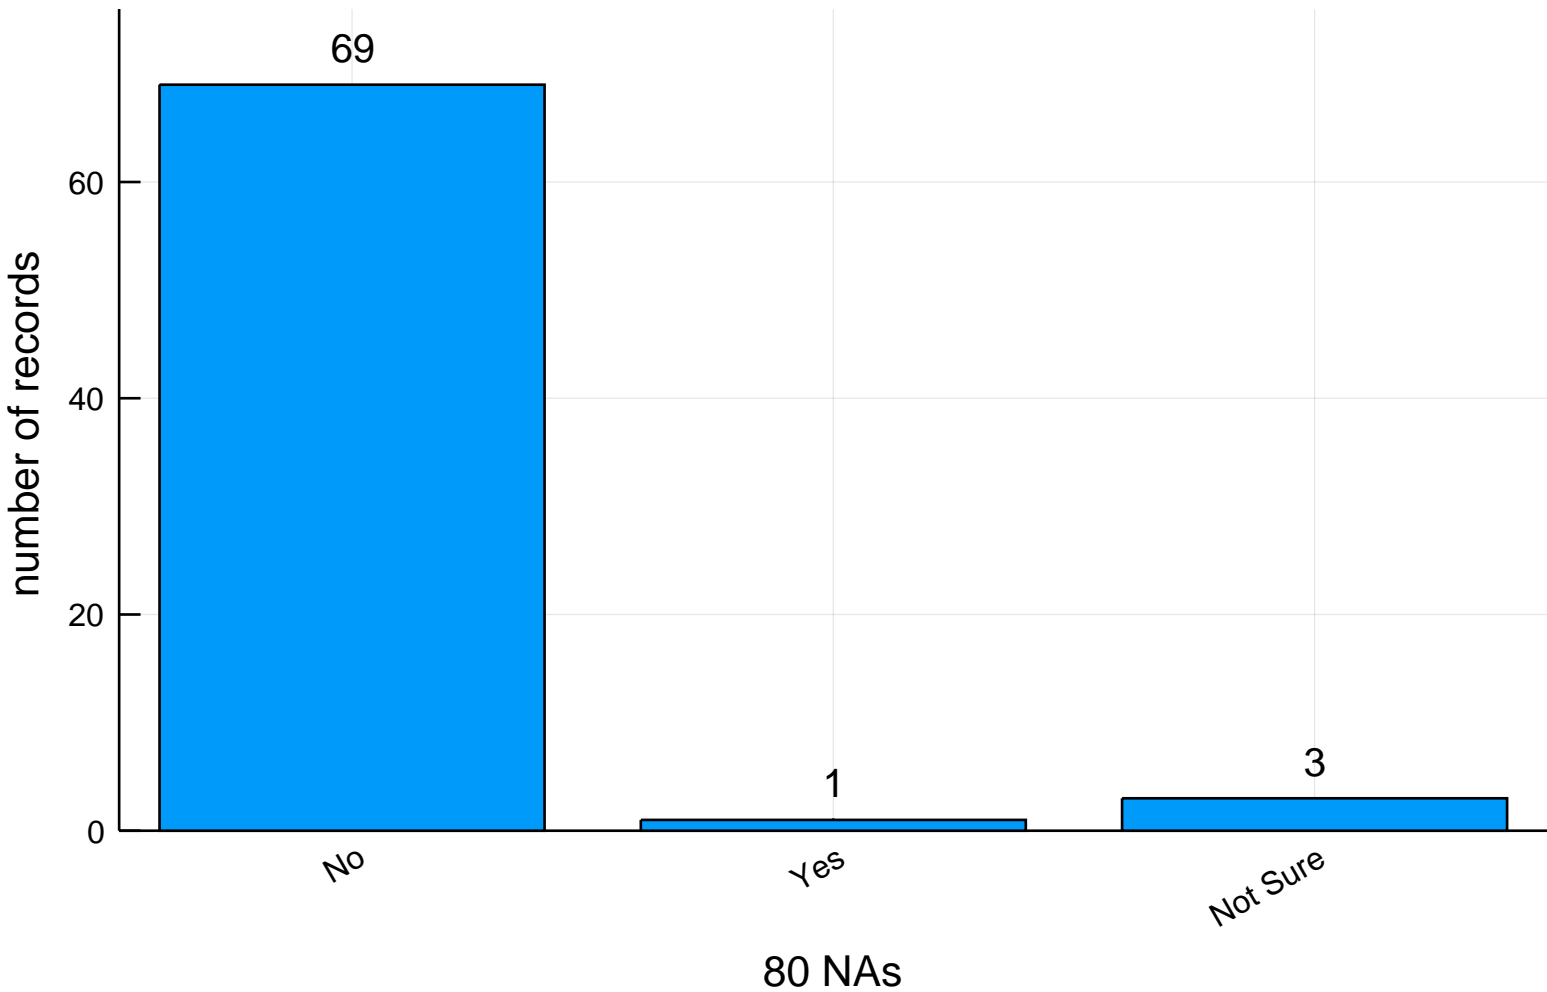

In the past 3 months have you consumed a (per Participant\_ID

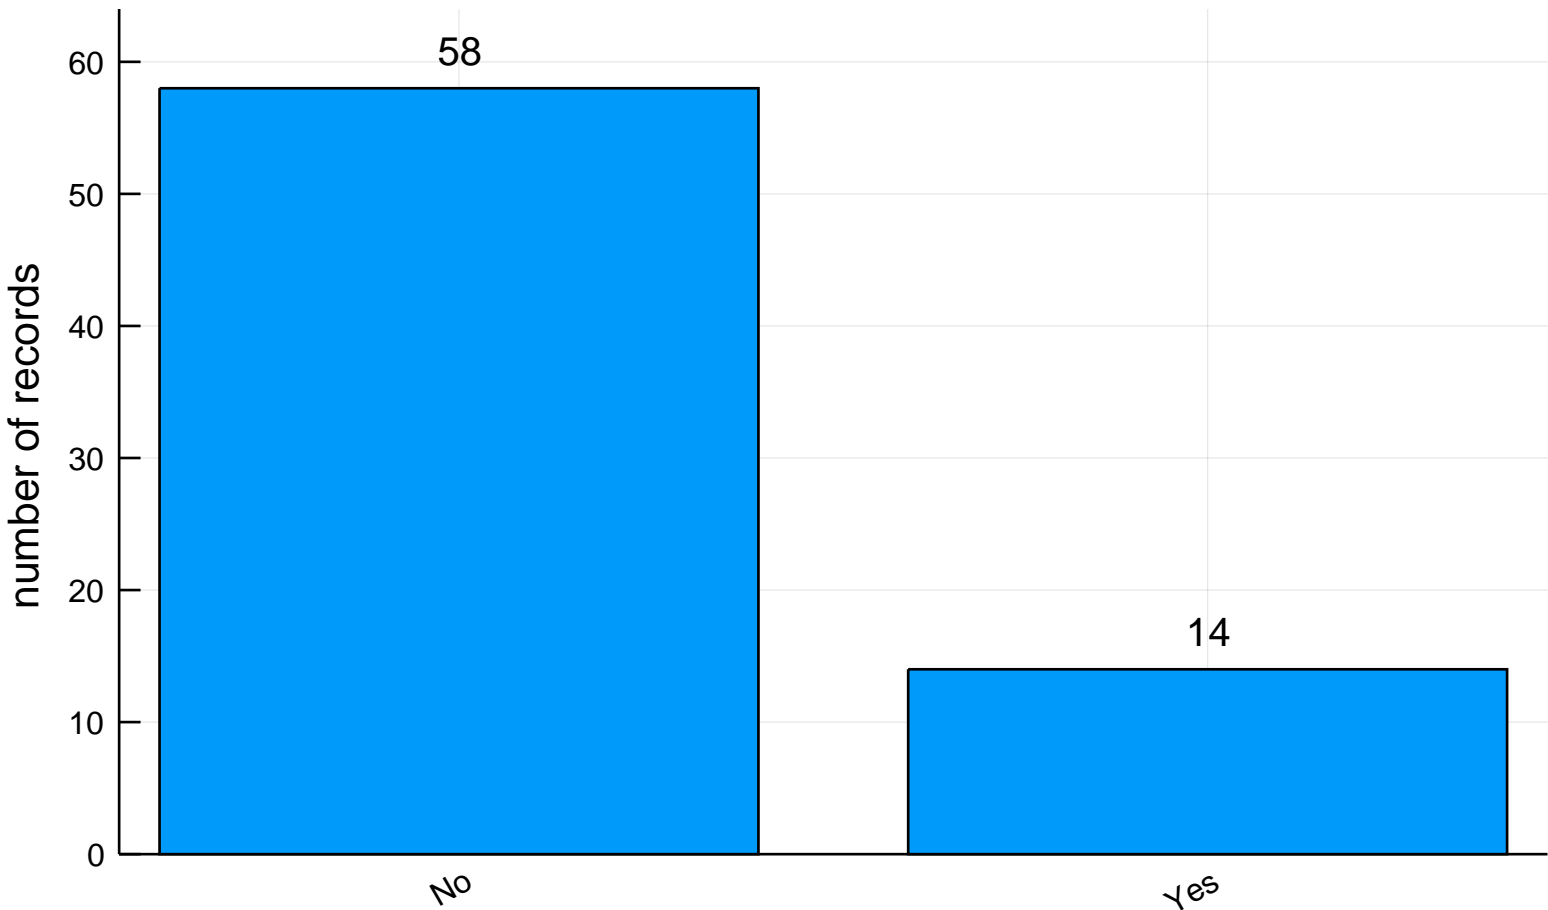

81 NAs

In the past 3 months how often have you (per Participant\_ID)

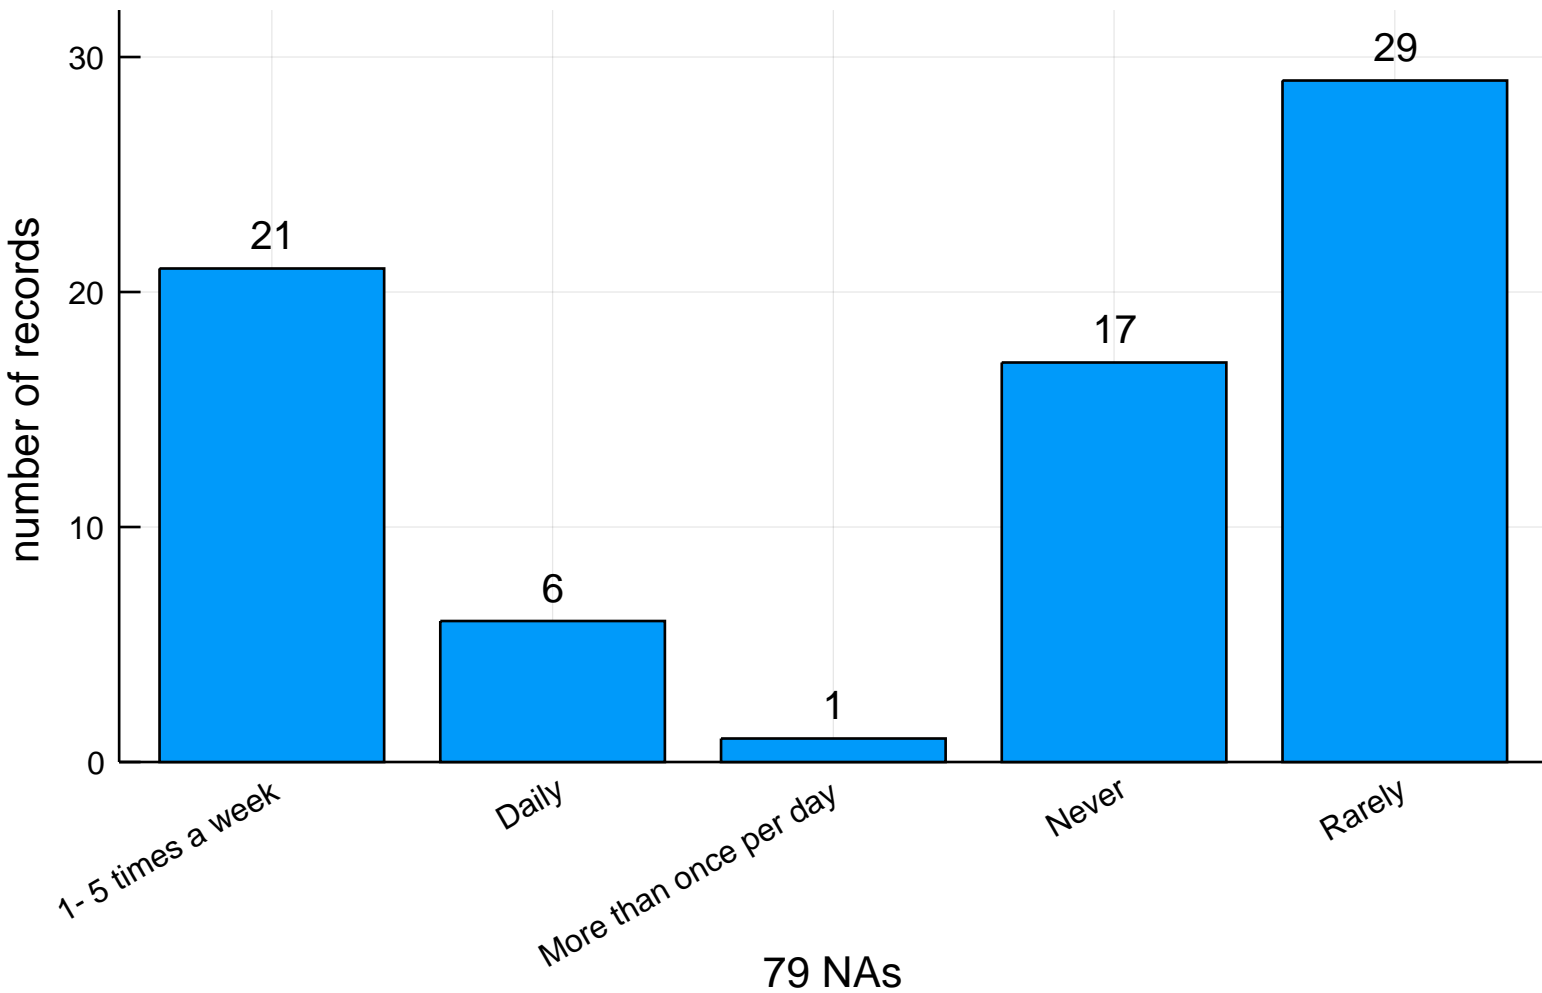



In the past 6 months have you used antib (per Participant\_ID)

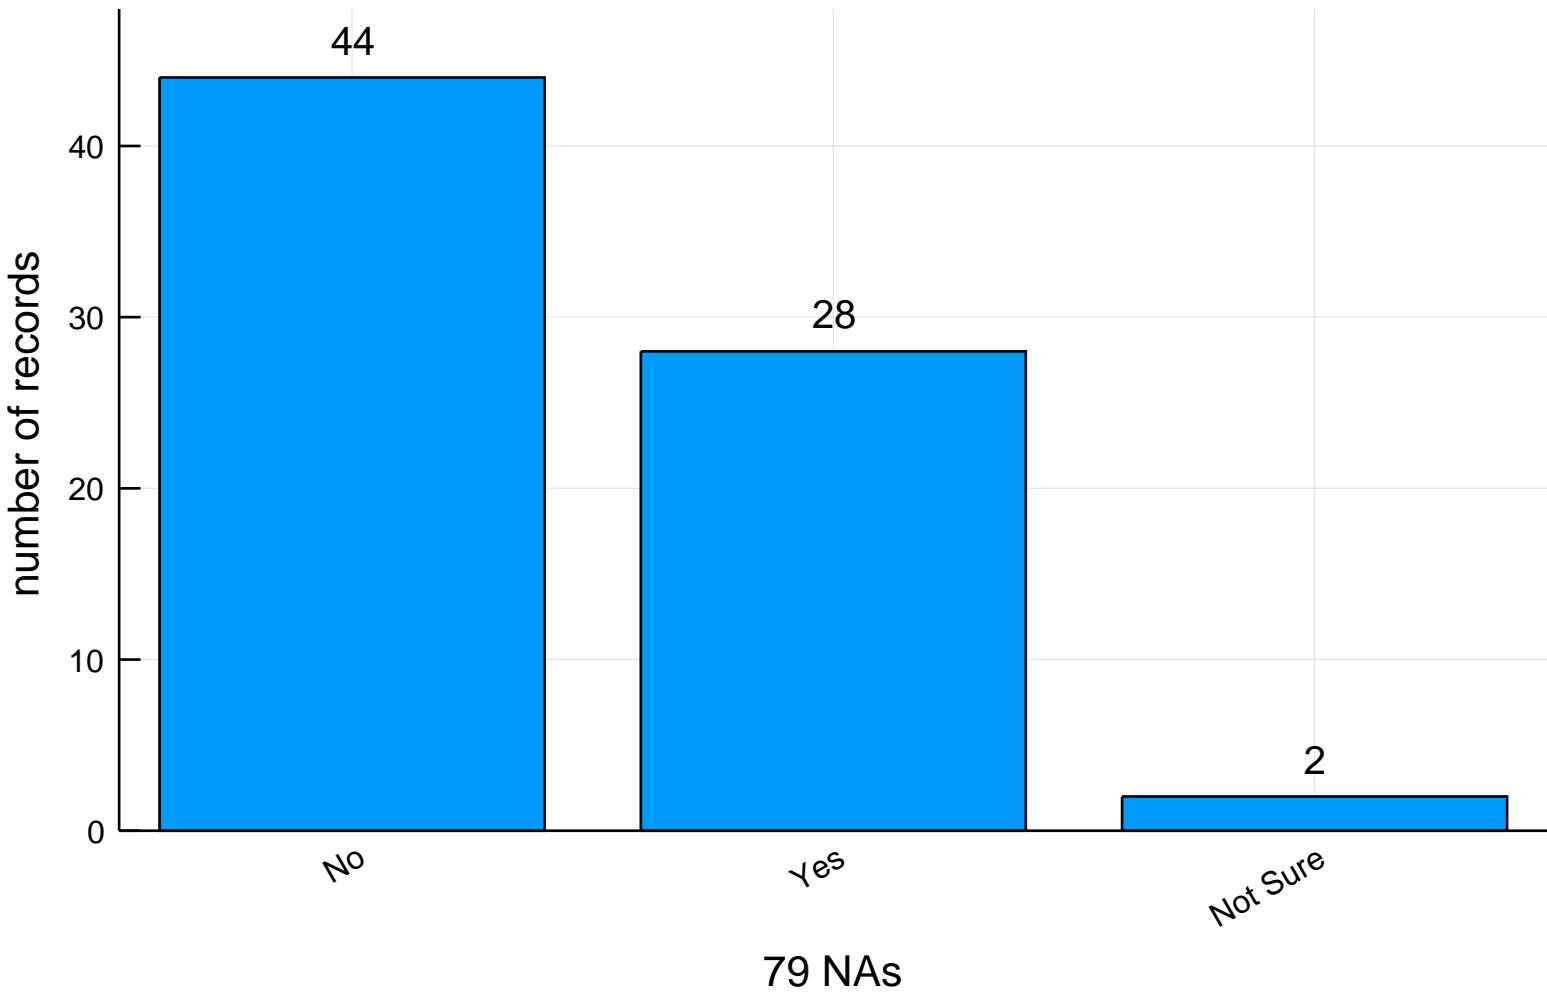

# In the past 7 days I felt fearful (per Participant\_ID)

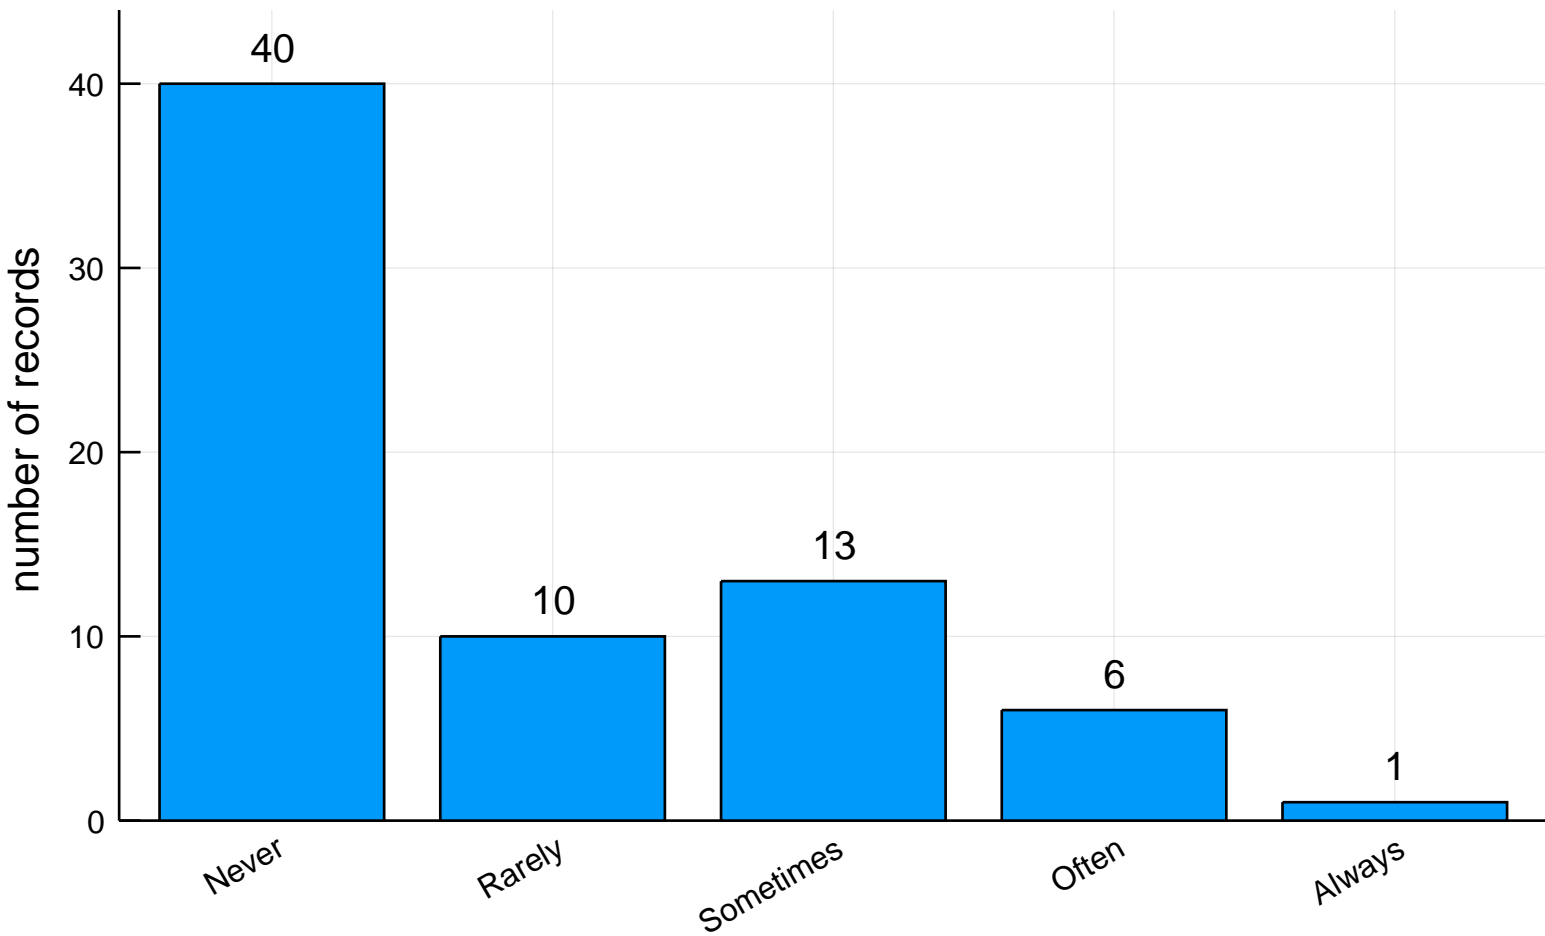

83 NAs

# In the past 7 days I felt worthless (per Participant\_ID)

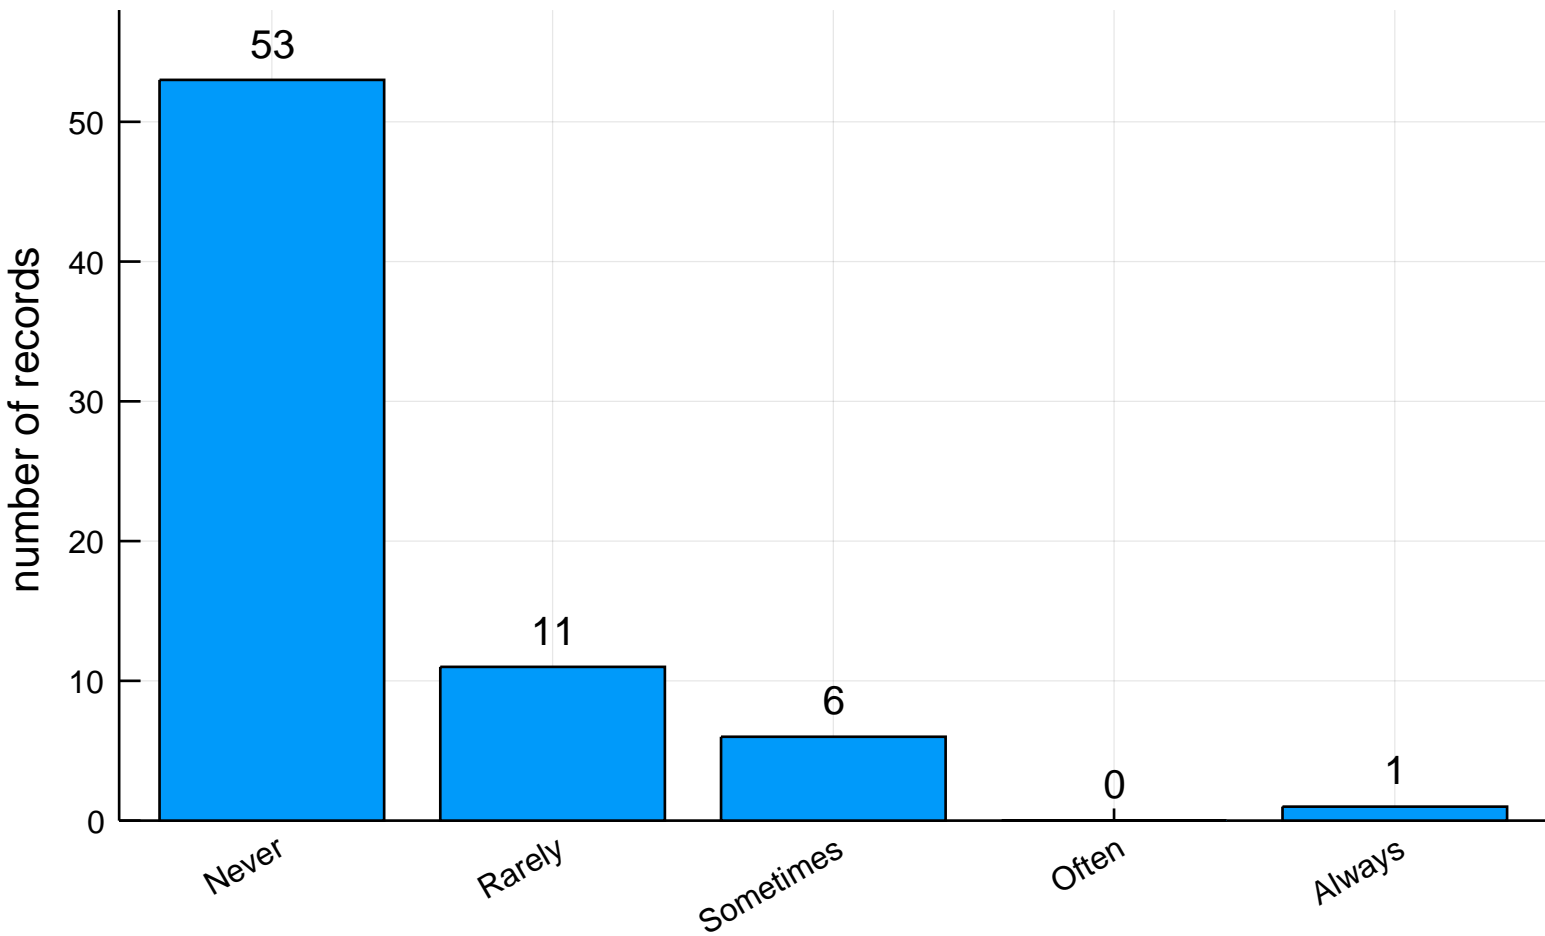

82 NAs

In the past 7 days my sleep quality was (per Participant\_ID)

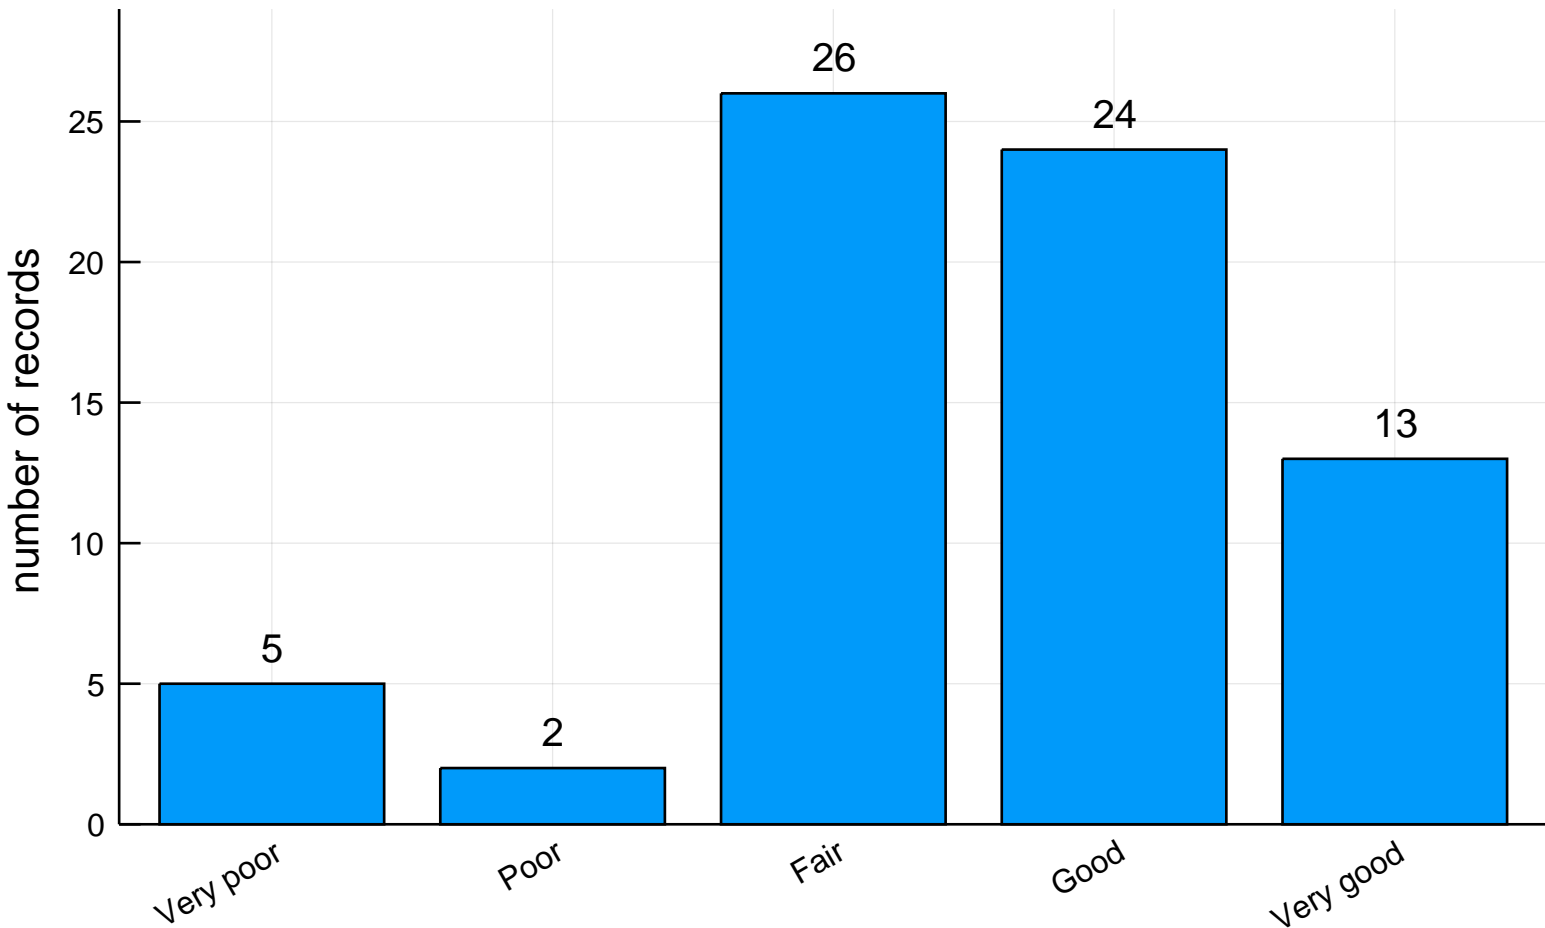

83 NAs

In the past 7 days my sleep was refreshi (per Participant\_ID)

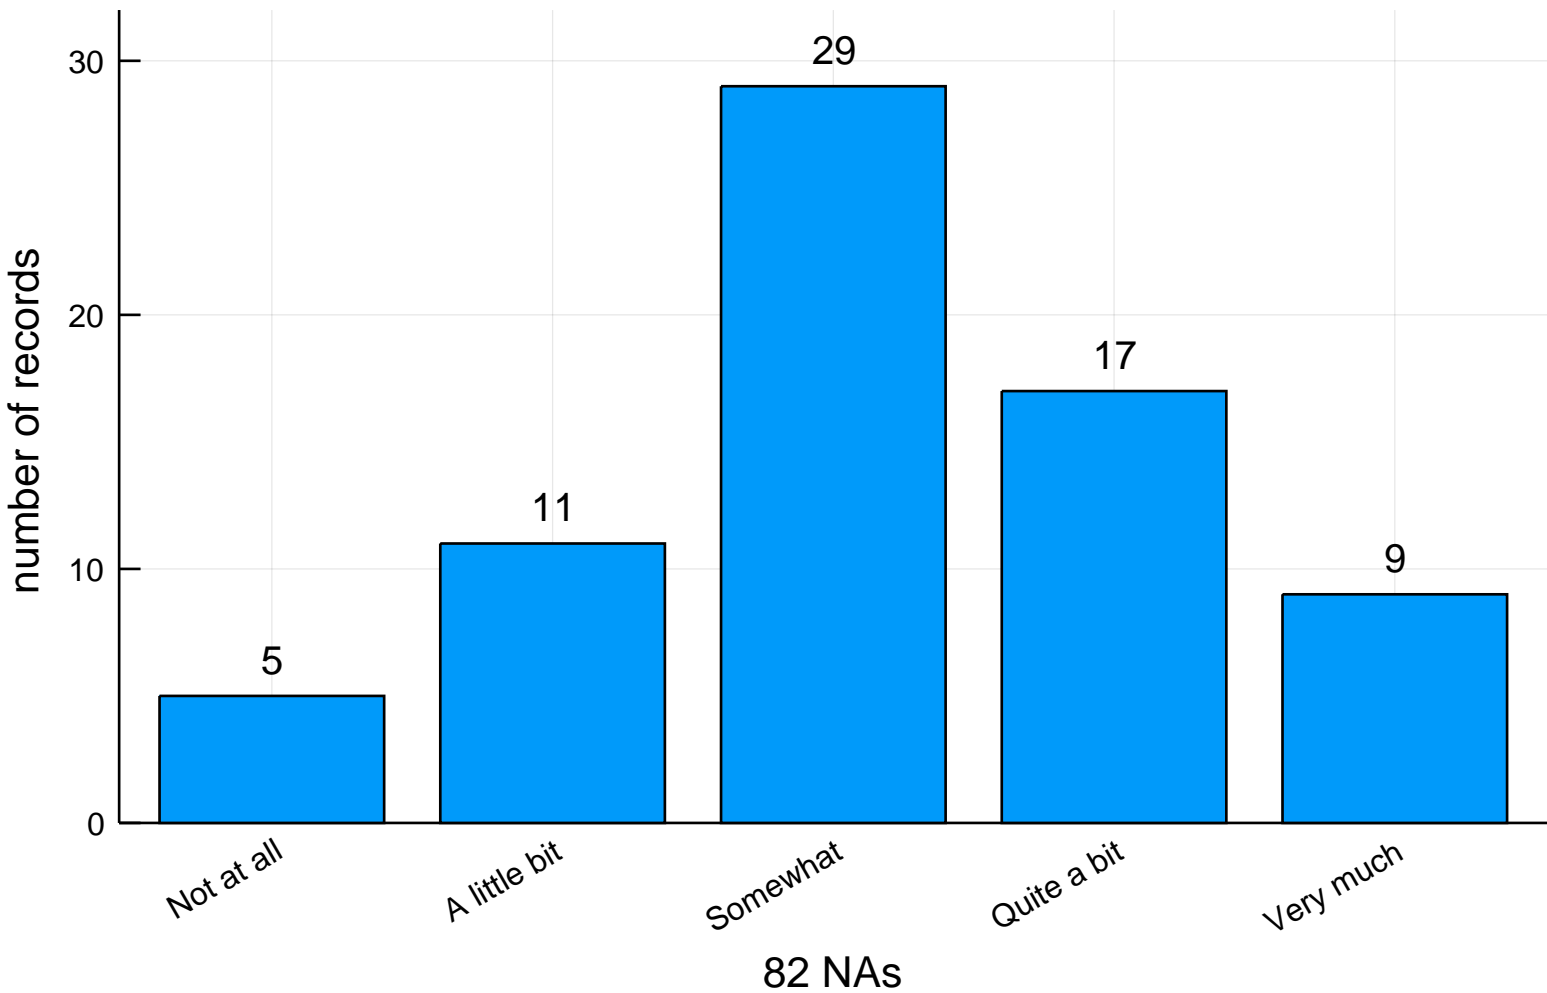

# IN THE PAST SIX MONTHS my disease has be (per Participant)

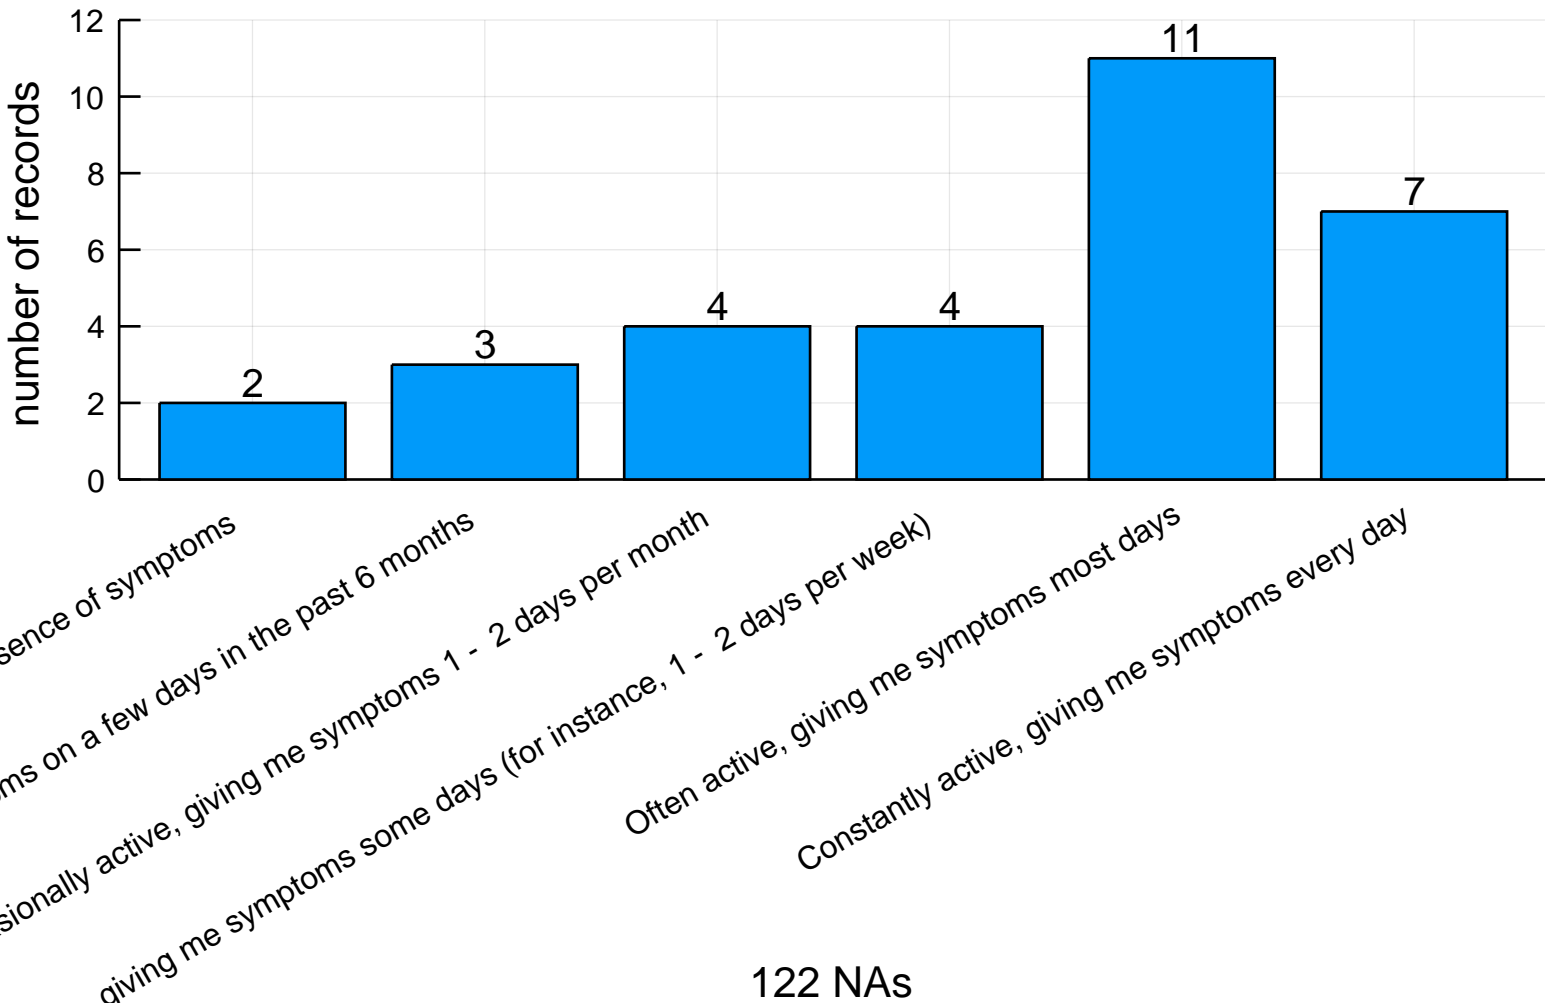

# Irritable bowel syndrome (per site\_sub\_coll)

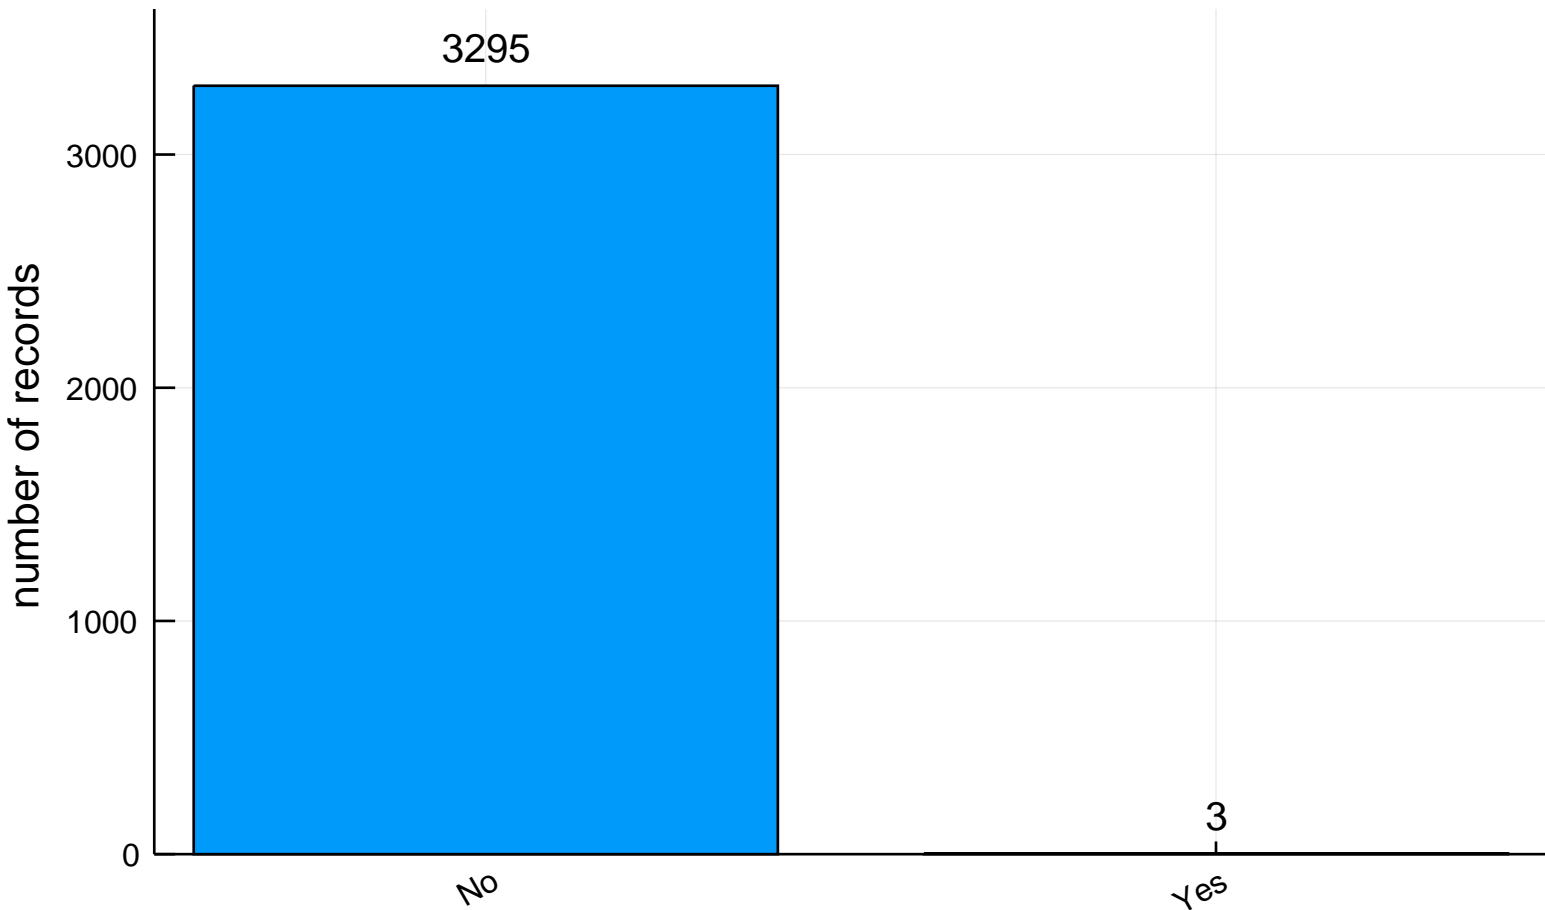

0 NAs

# is inflamed (per row)

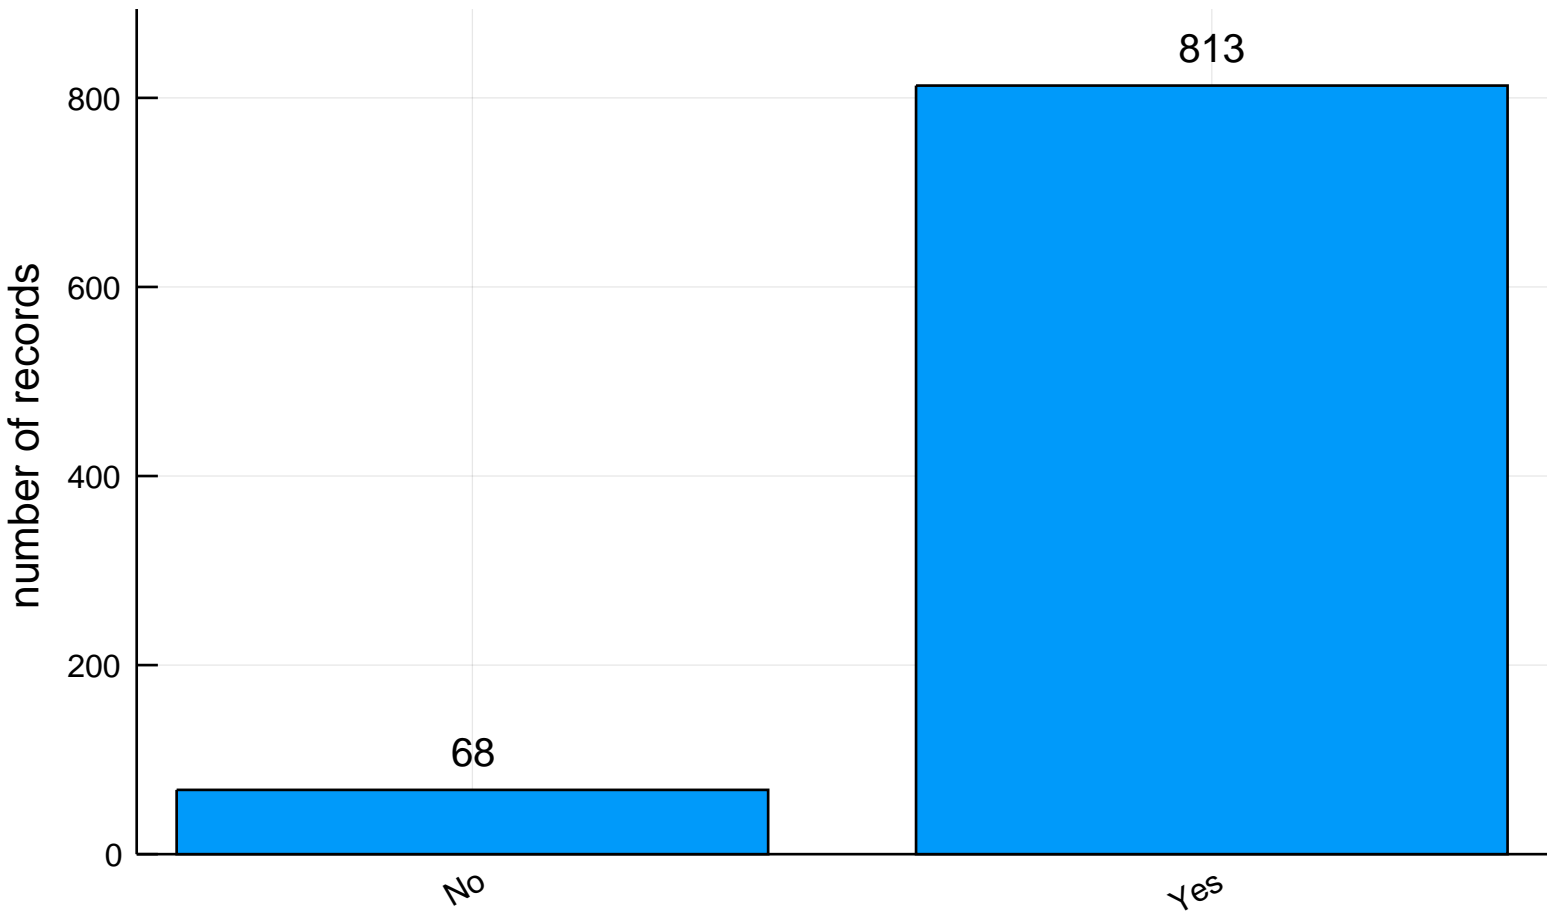

5716 NAs



# IV steroids (per site\_sub\_coll)

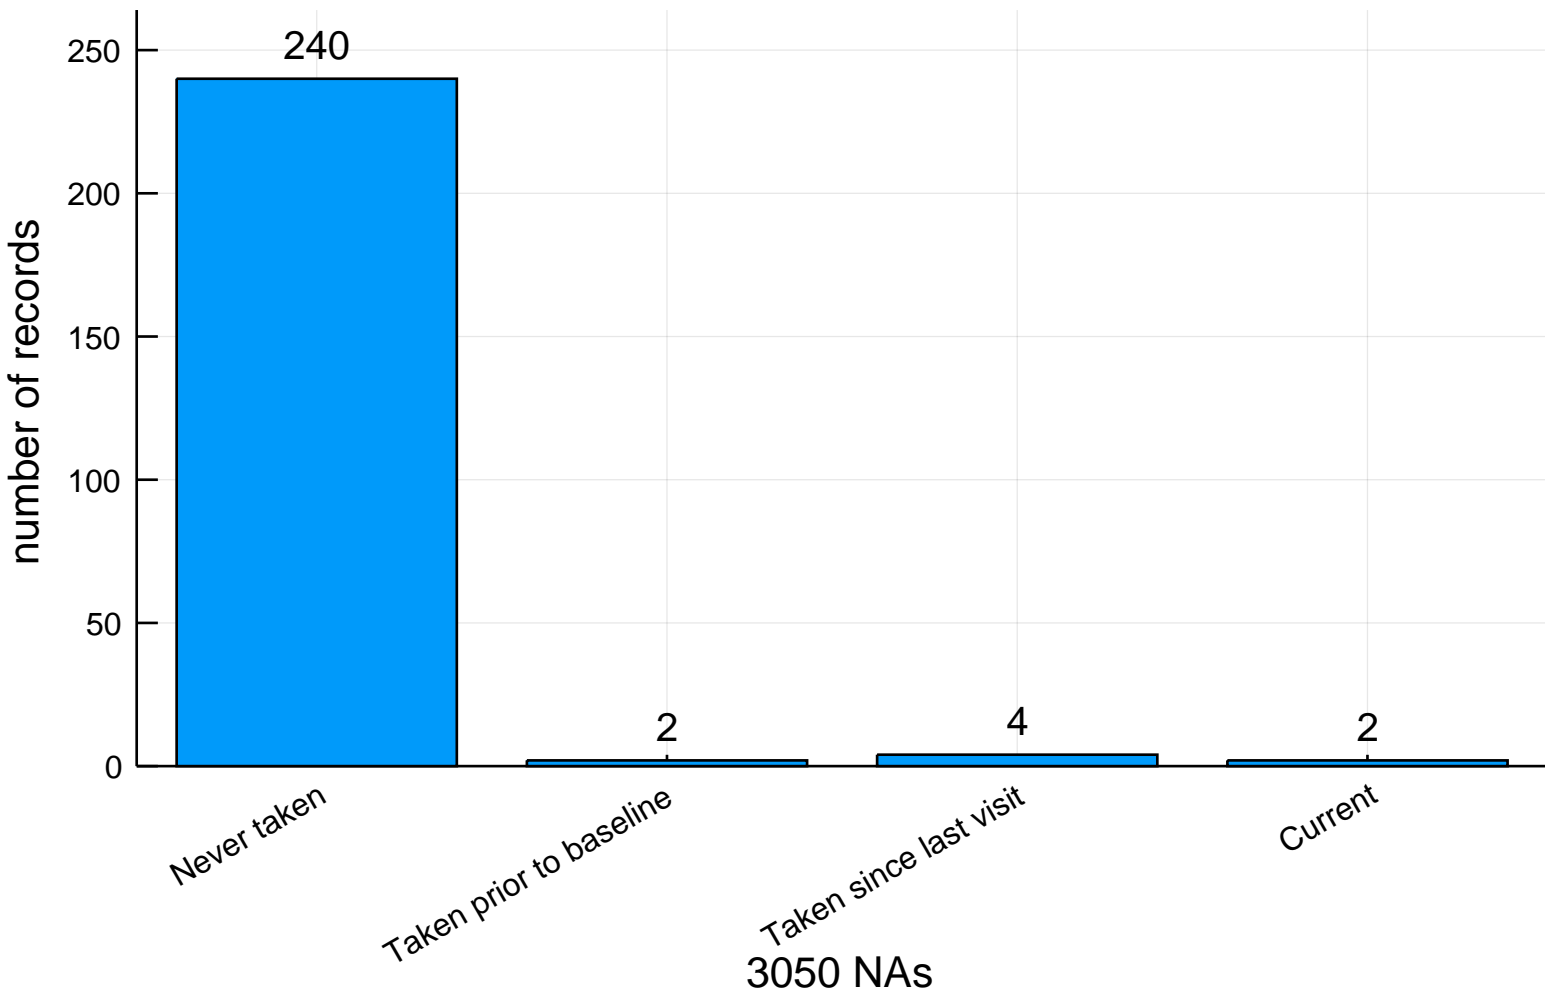

# I felt anxious (per Participant\_ID)

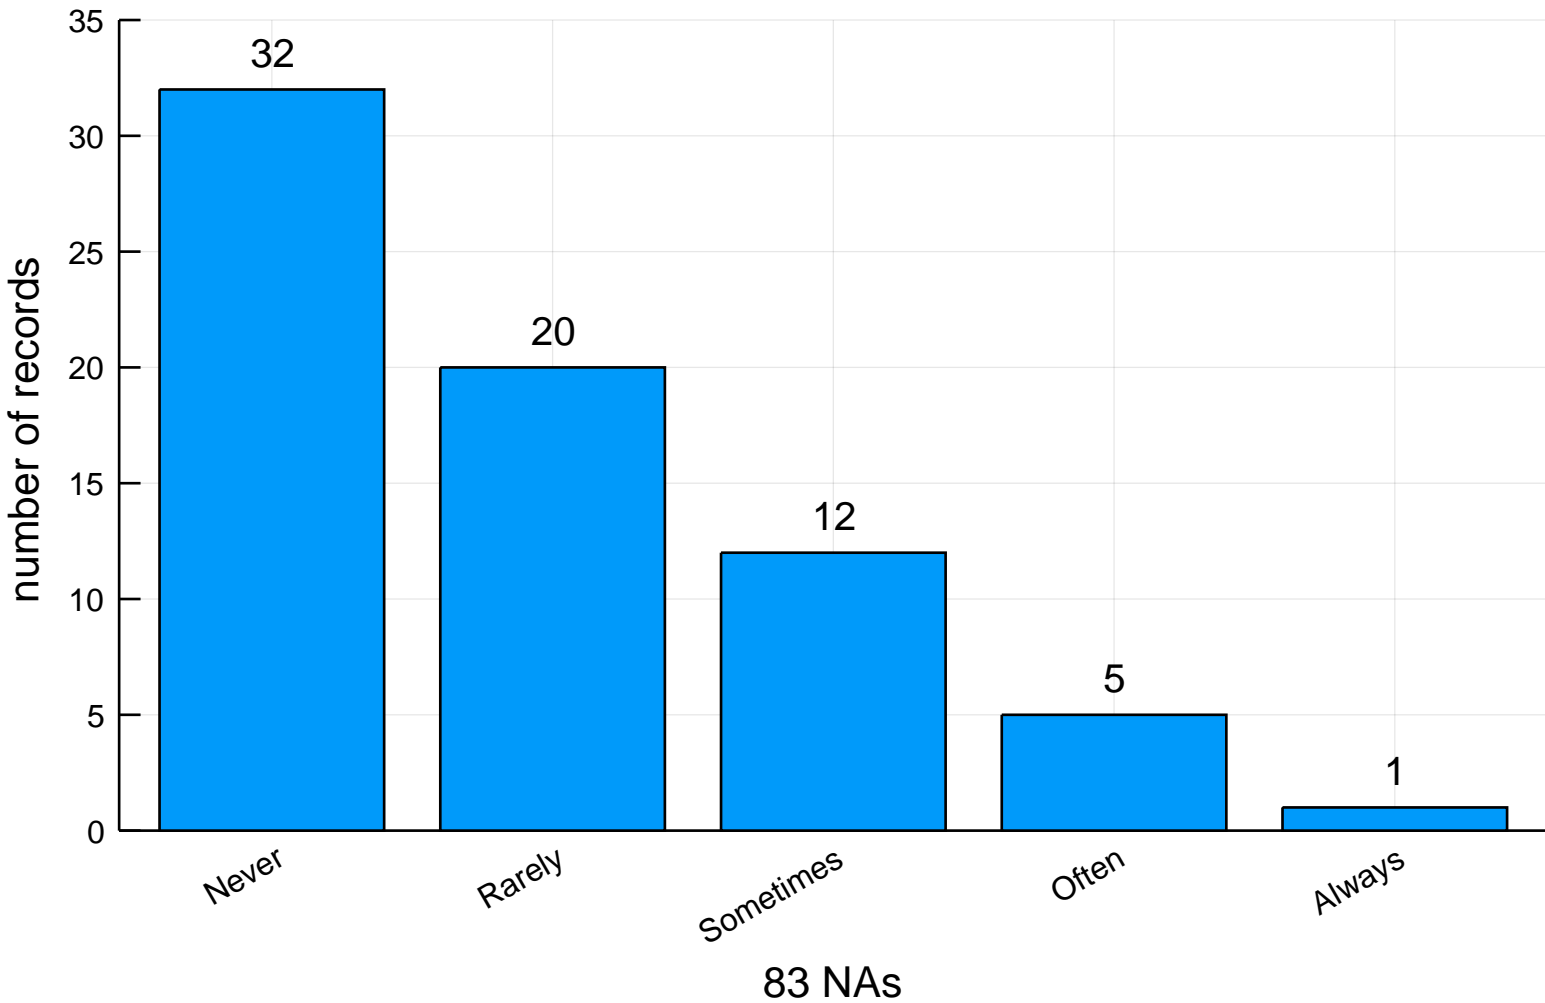

# I felt depressed (per Participant\_ID)

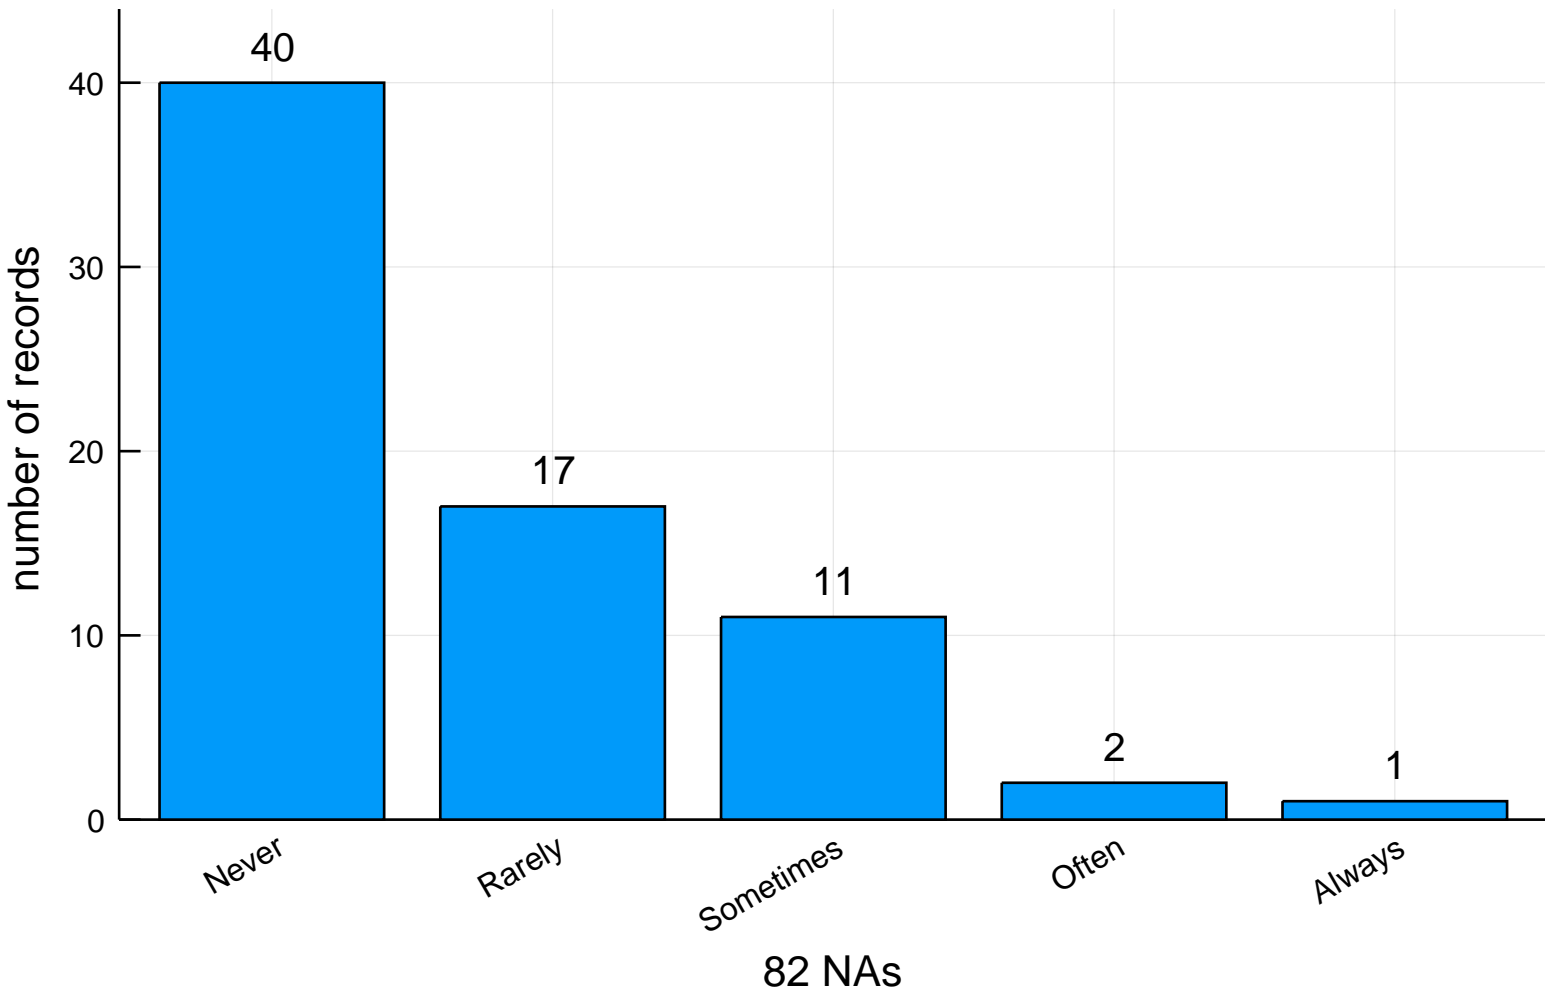

# I felt helpless (per Participant\_ID)

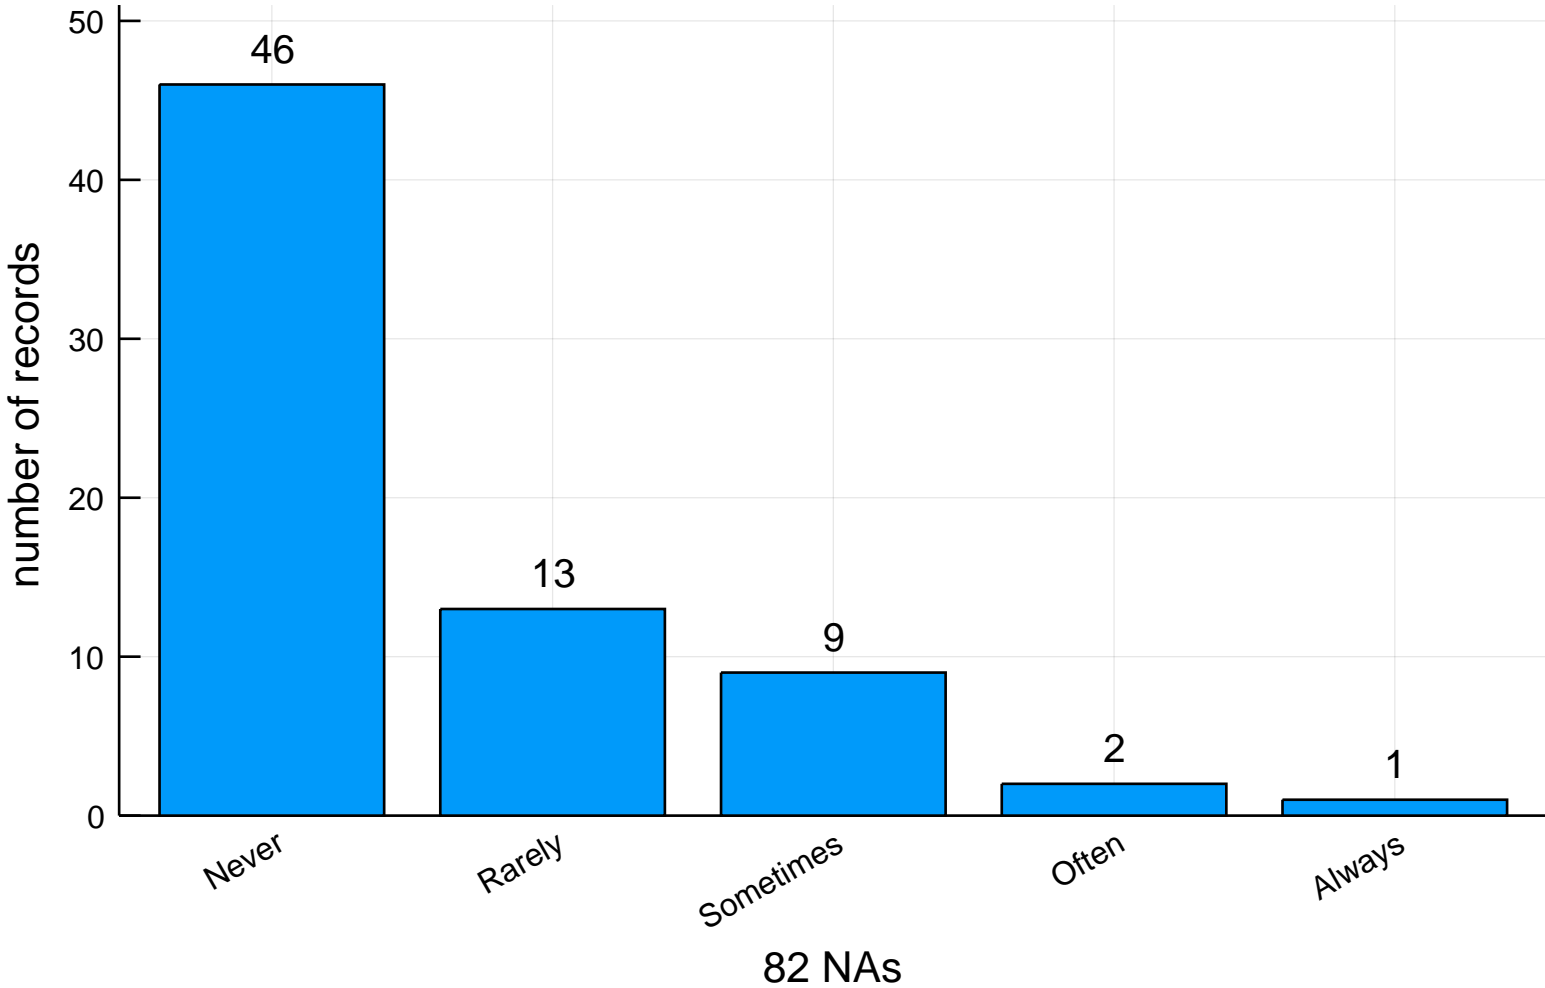

# I felt hopeless (per Participant\_ID)

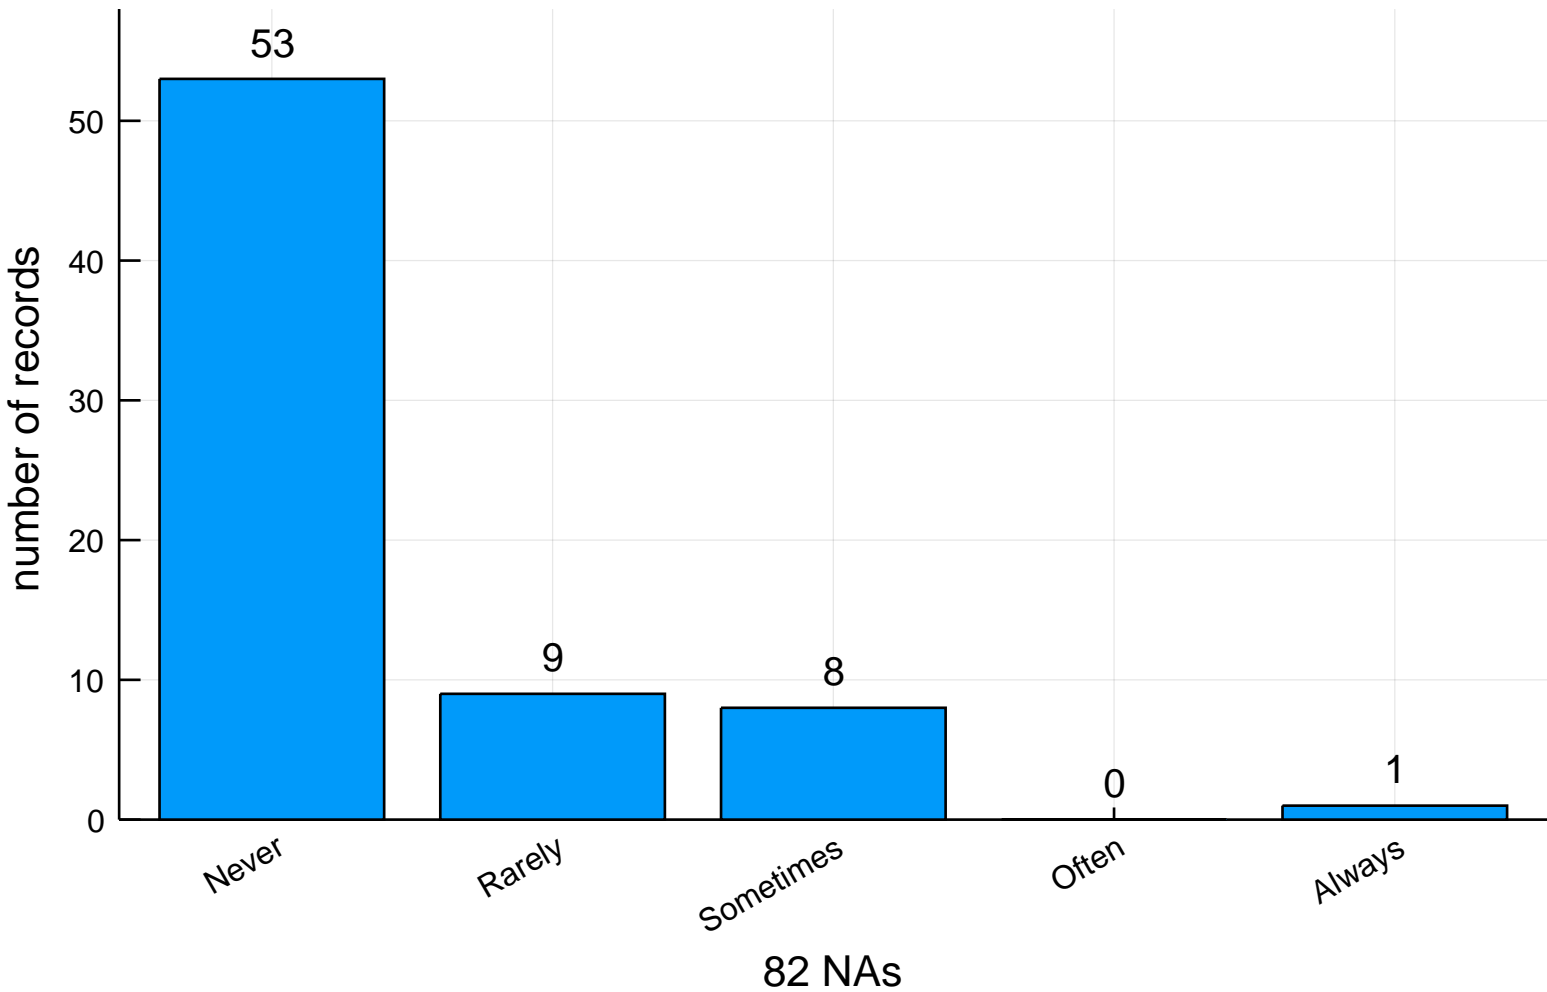

# I felt like a failure (per Participant\_ID)

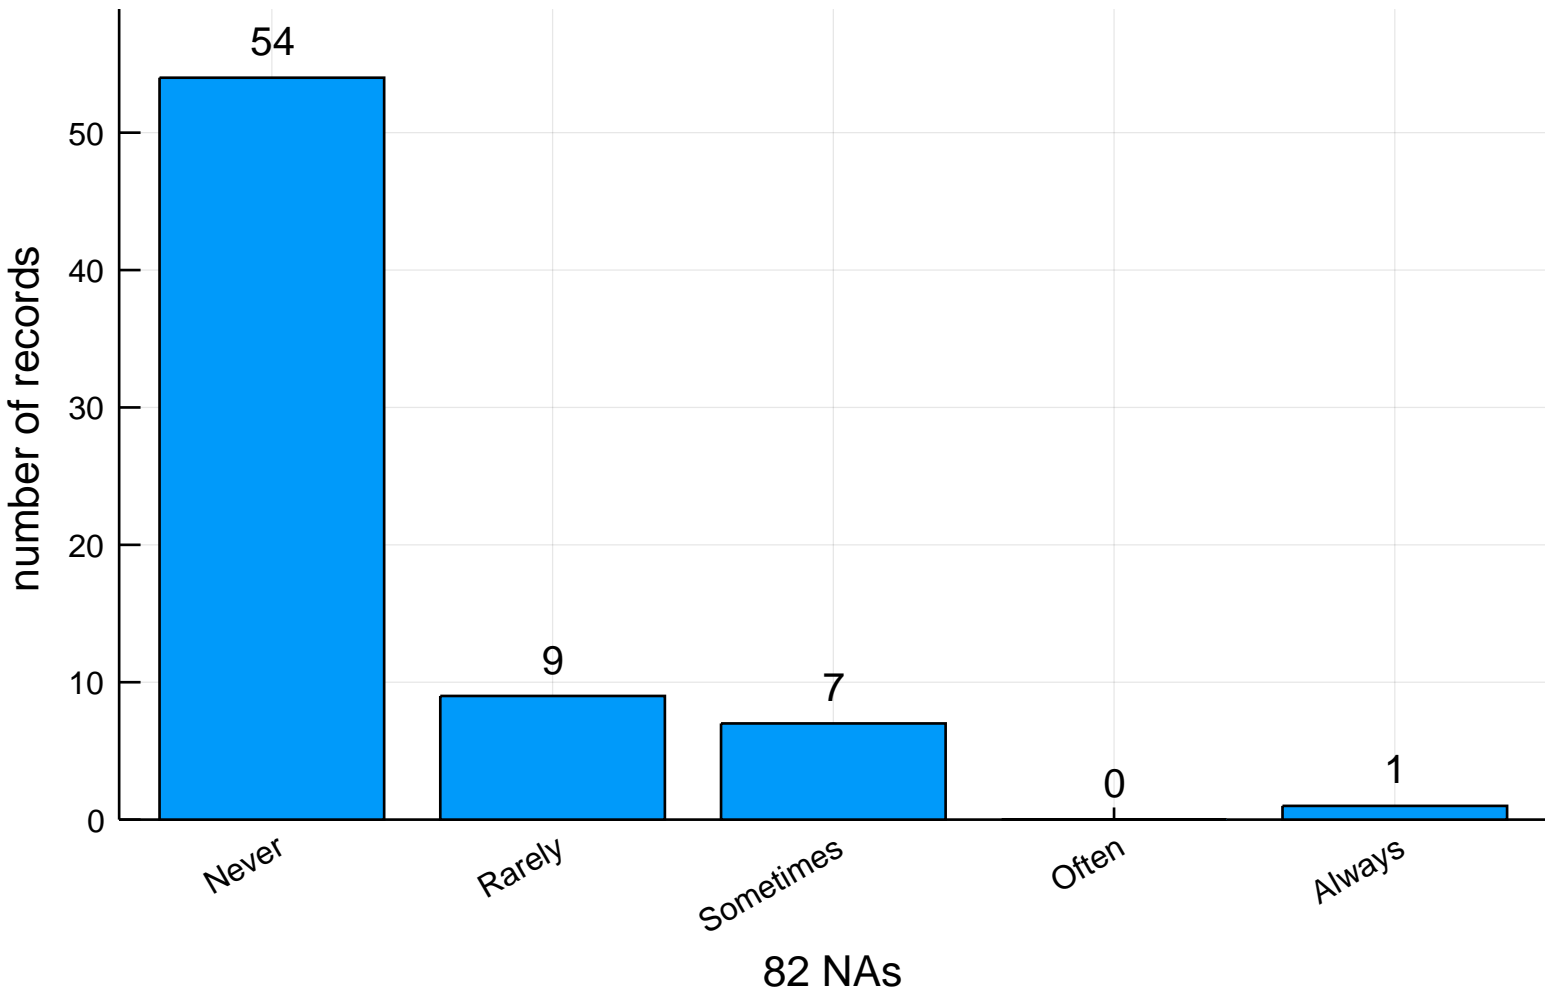

# I felt like I needed help for my anxiety (per Participant\_ID)

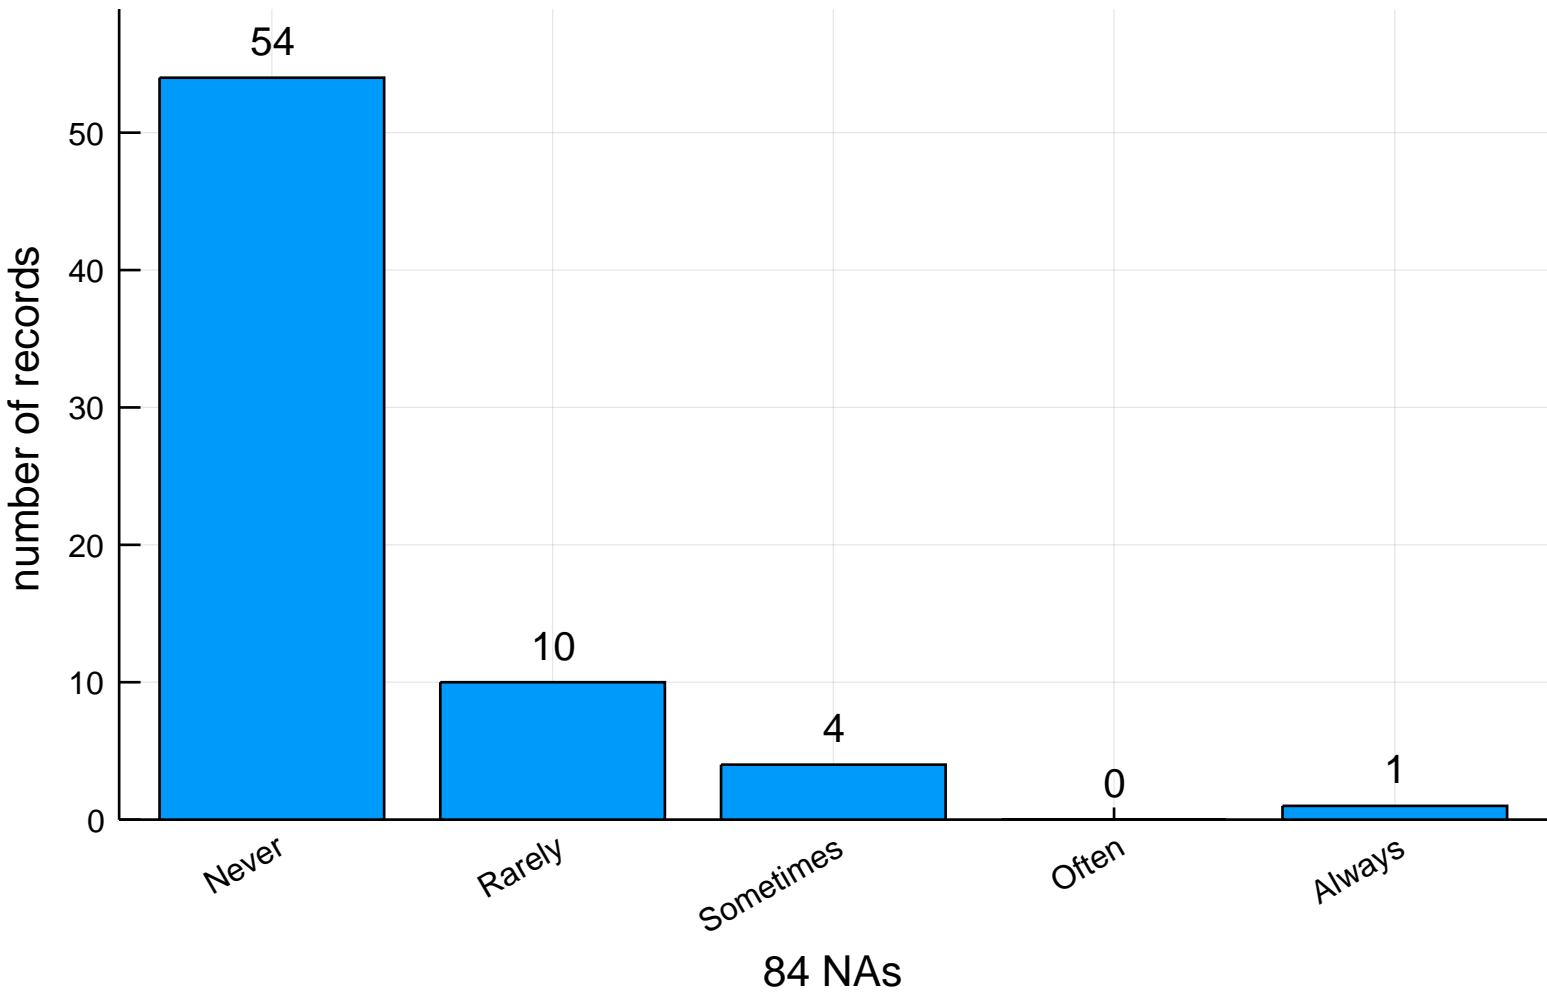

# I felt nervous (per Participant\_ID)

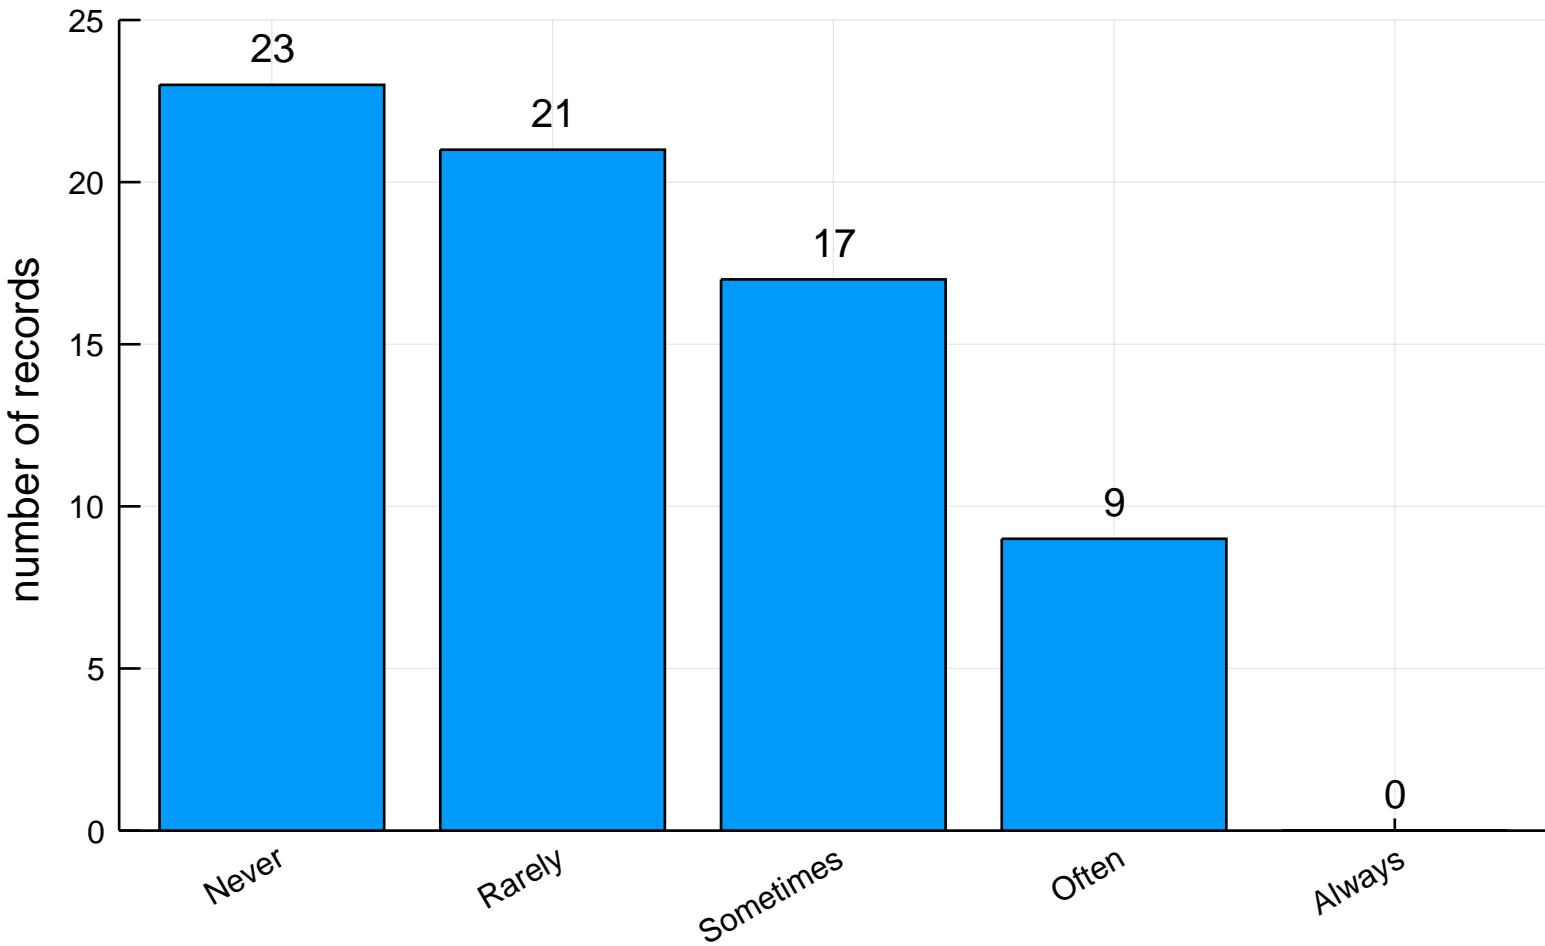

83 NAs



# I felt tense (per Participant\_ID)

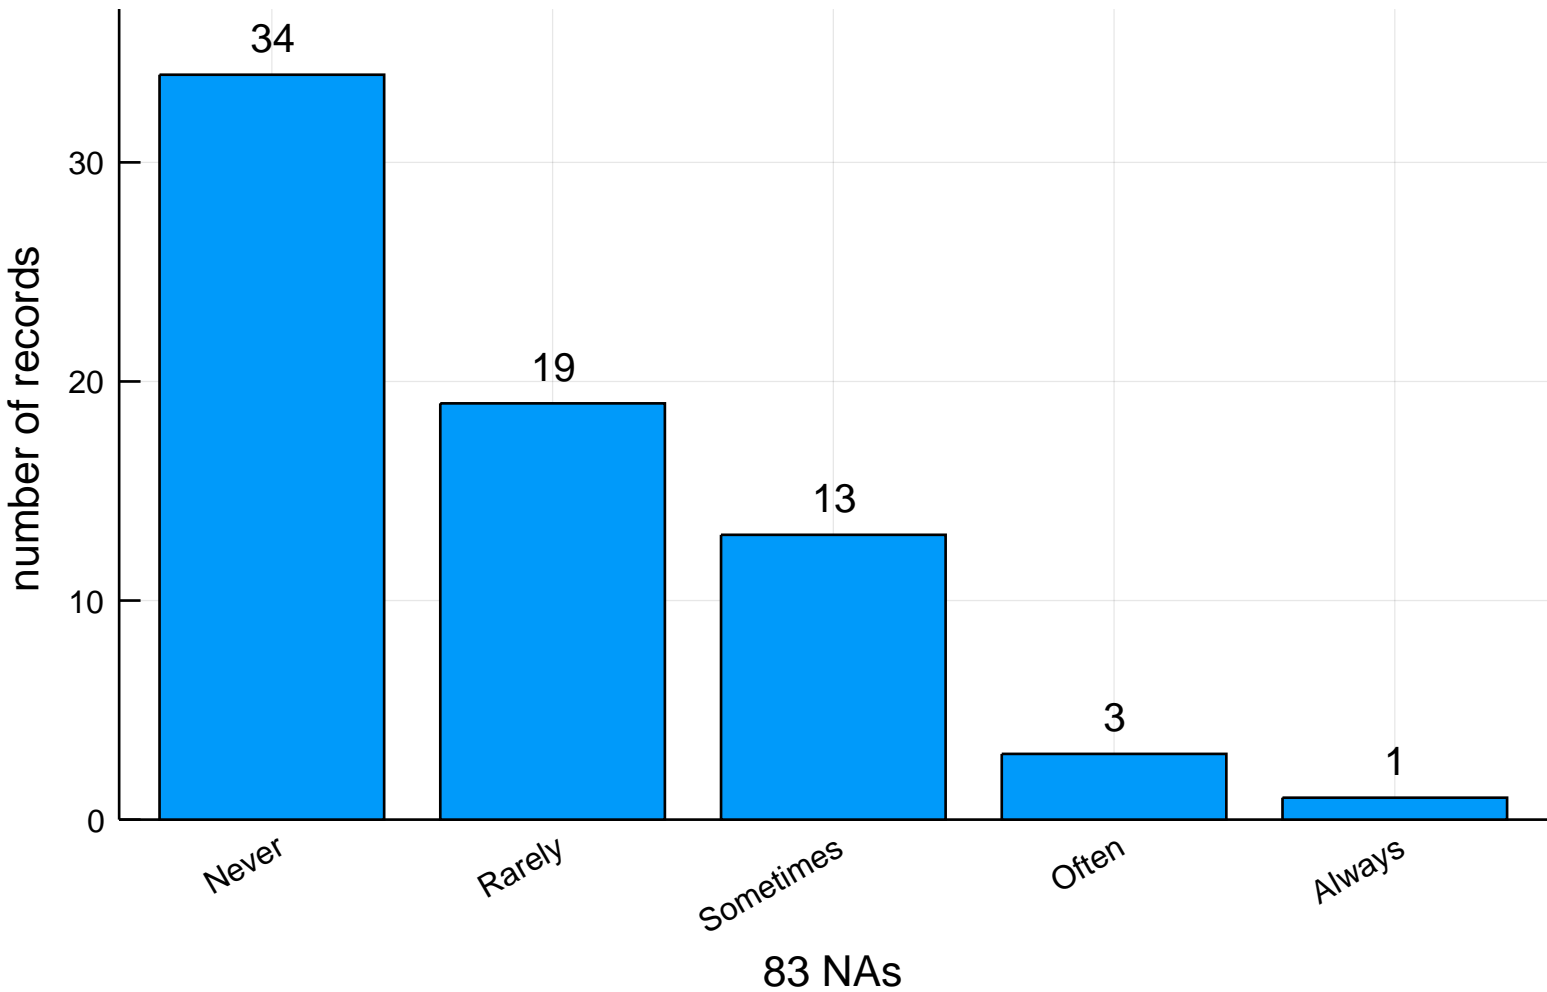

# I felt that I had nothing to look forward (per Participant\_ID)

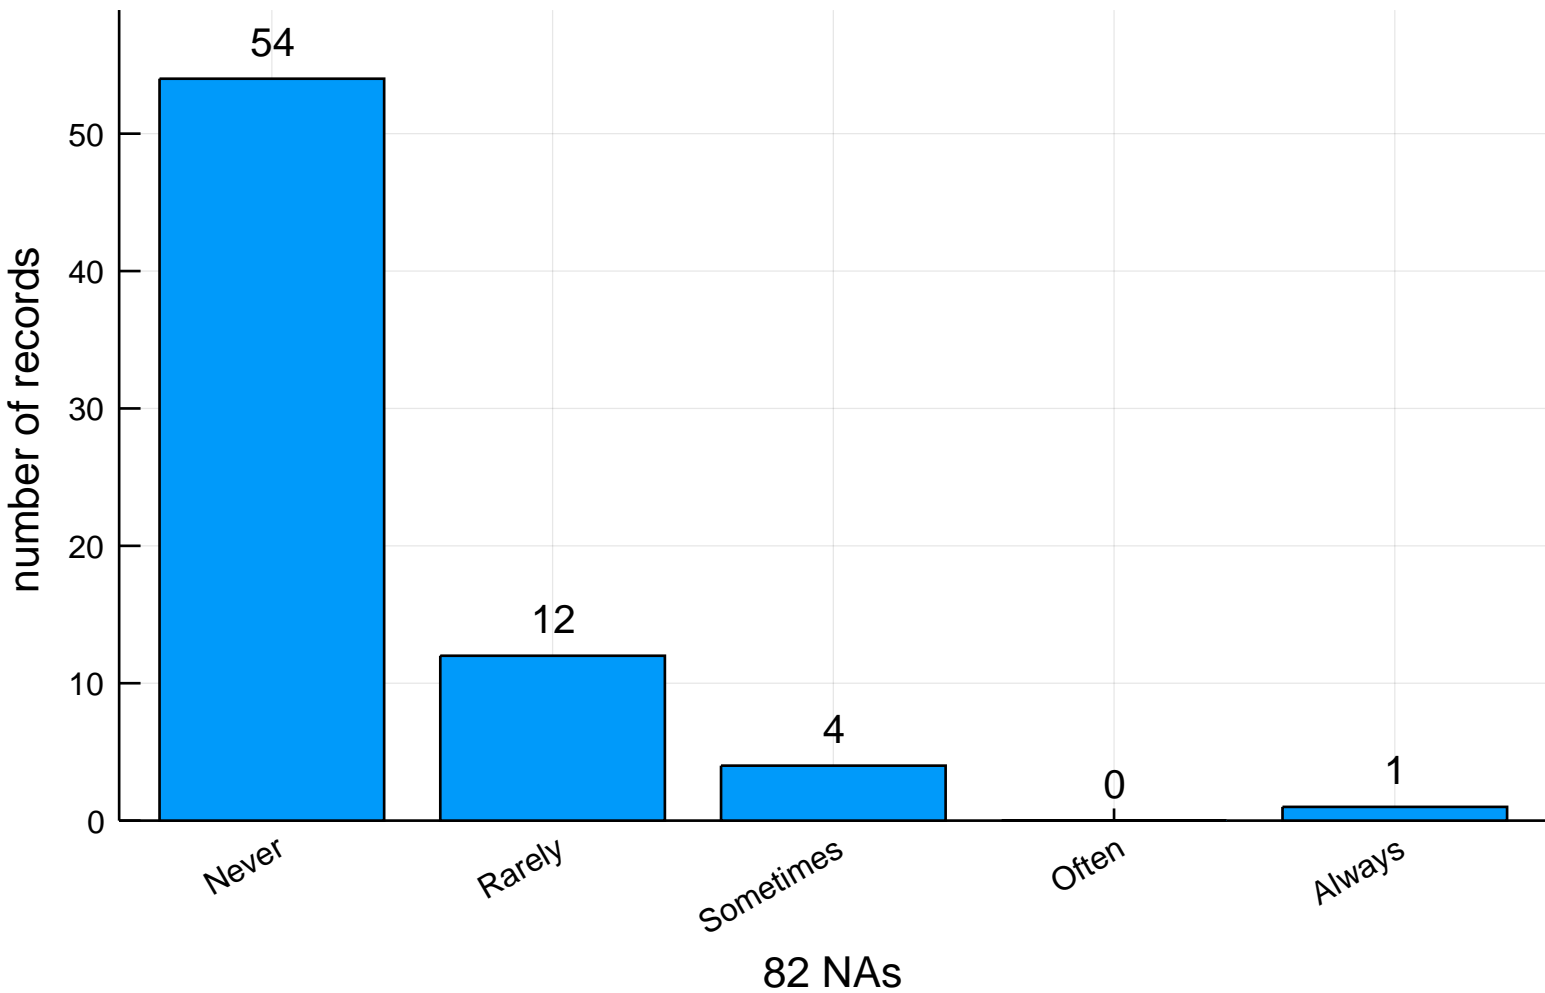

# I felt that nothing could cheer me up (per Participant\_ID)

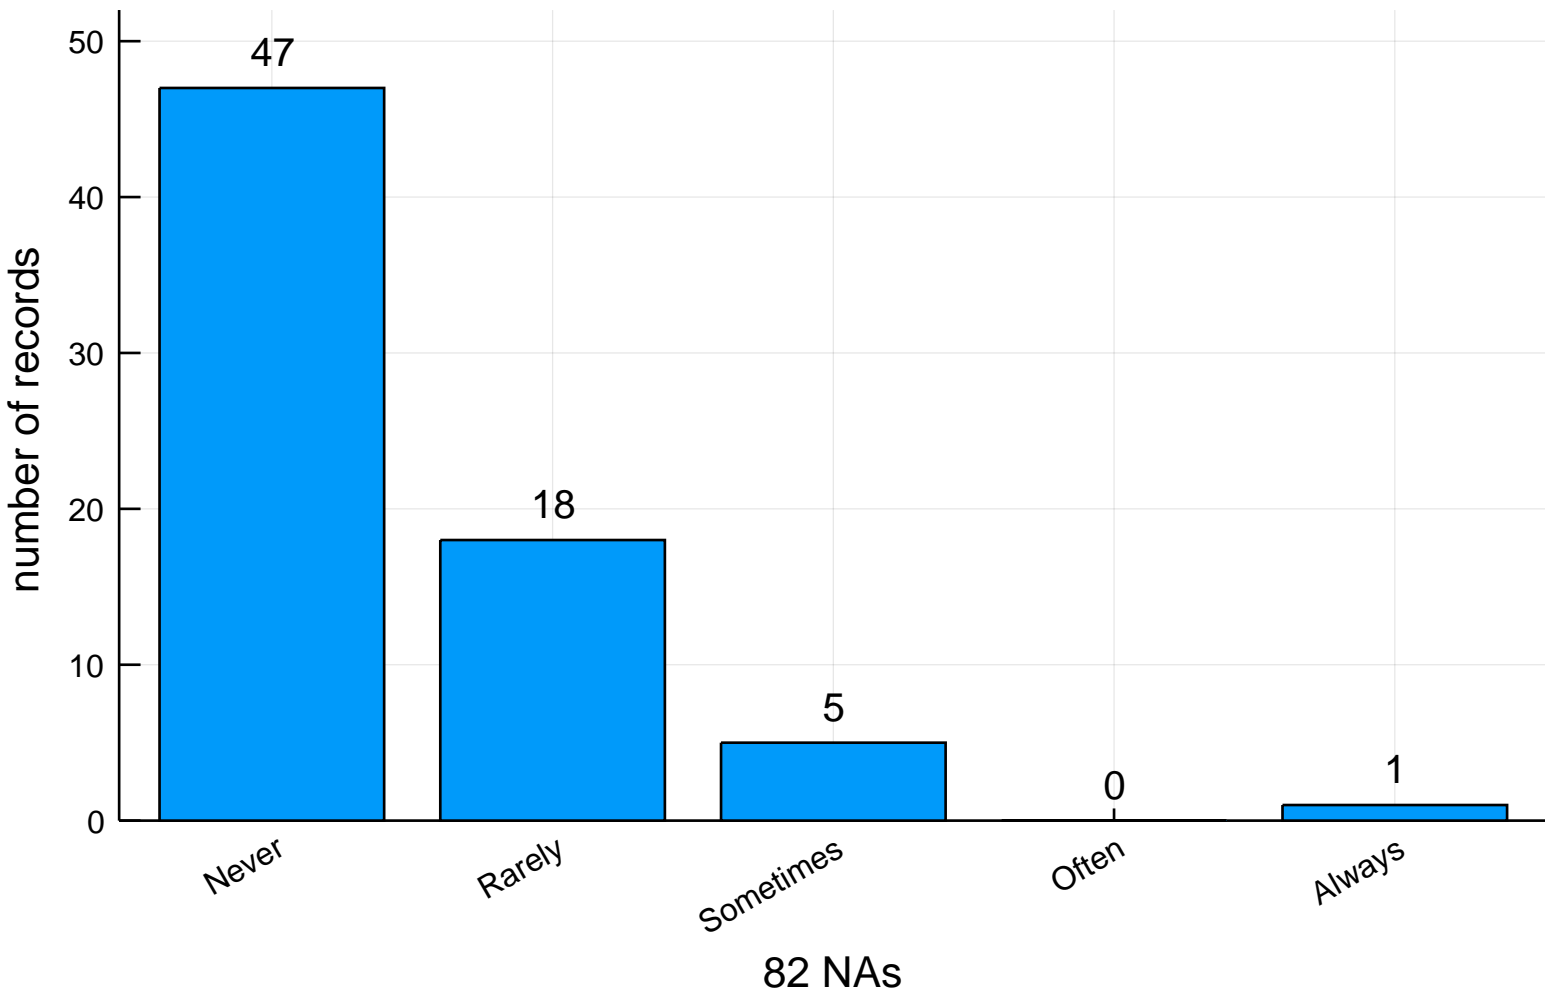

# I felt uneasy (per Participant\_ID)

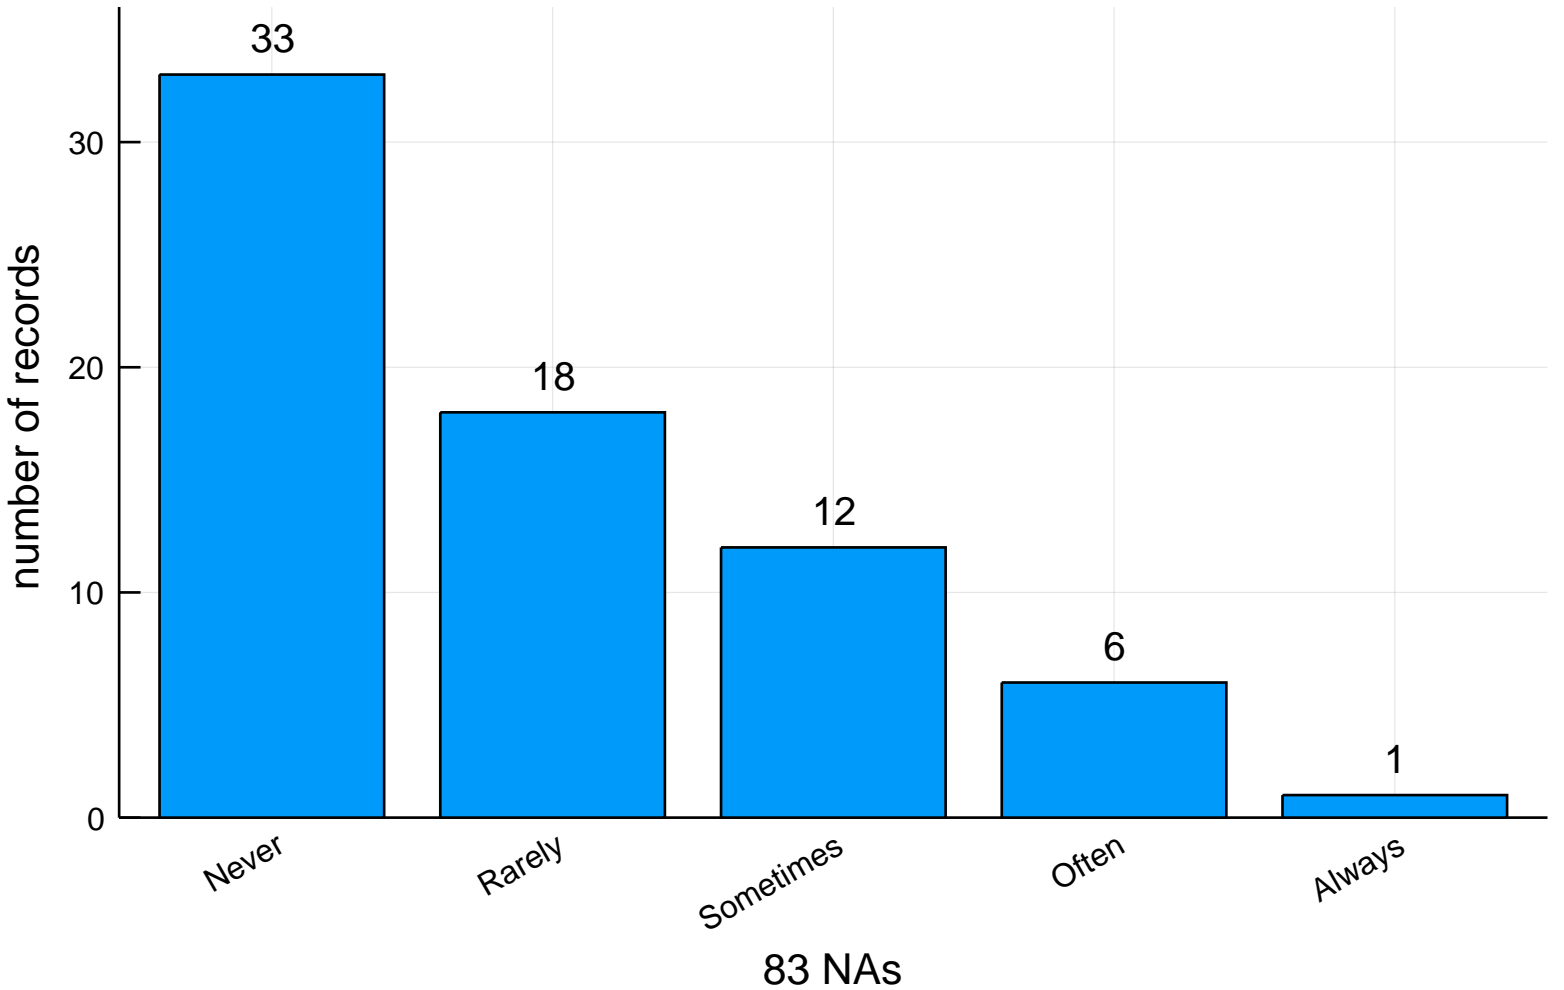

# I felt unhappy (per Participant\_ID)

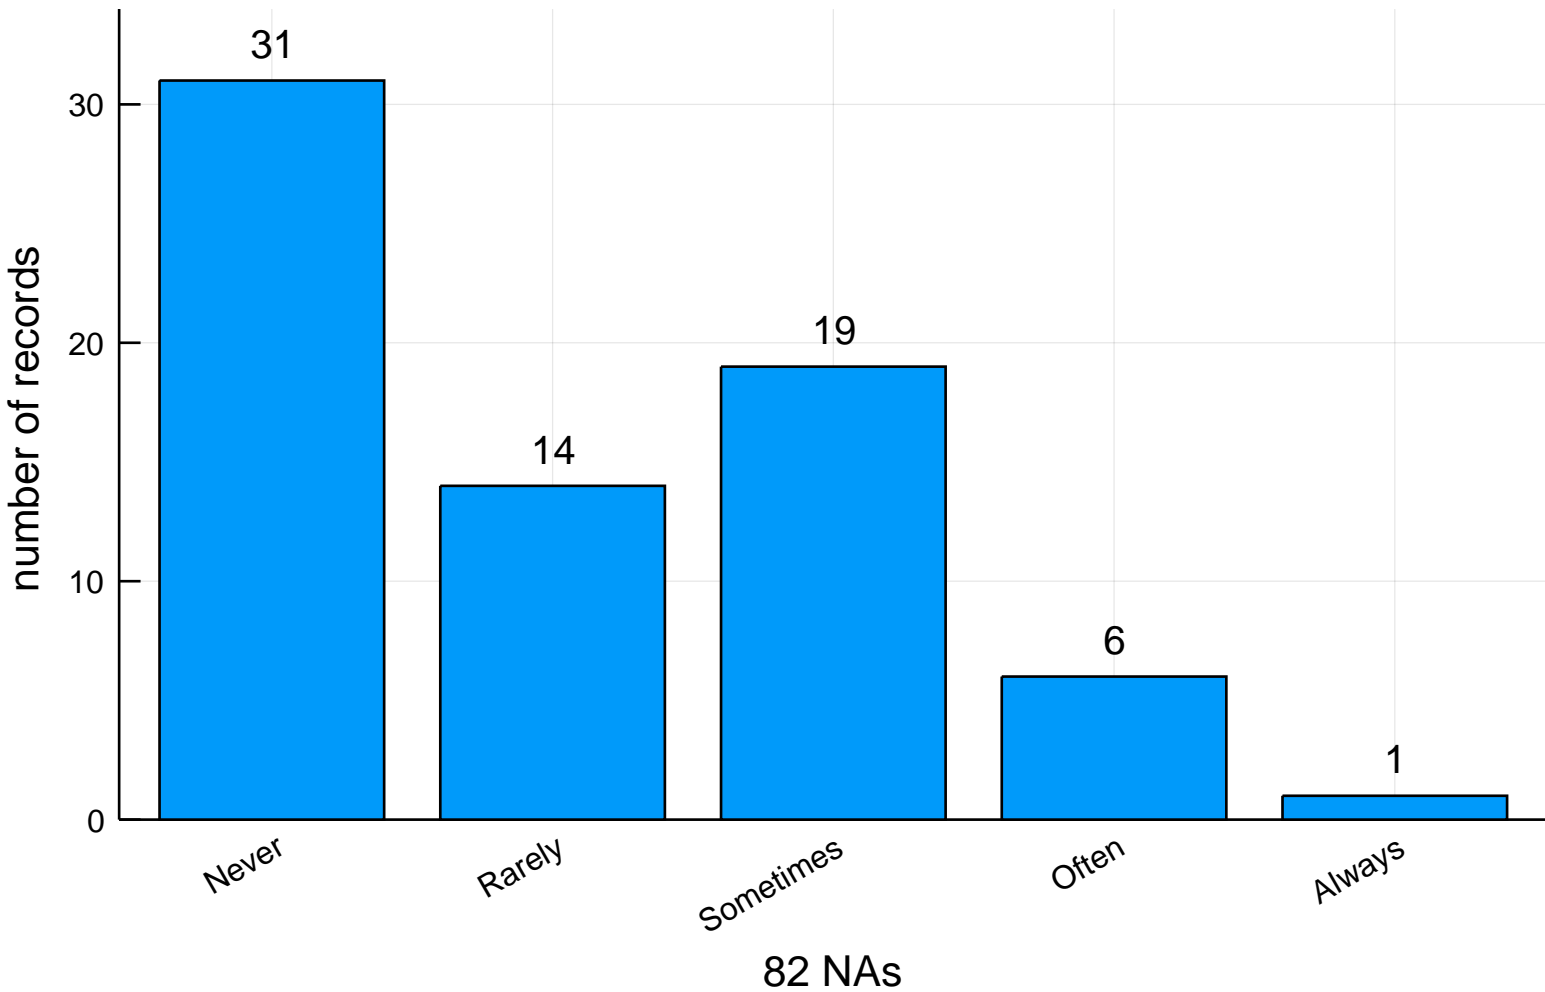

# I found it hard to focus on anything oth (per Participant\_ID)

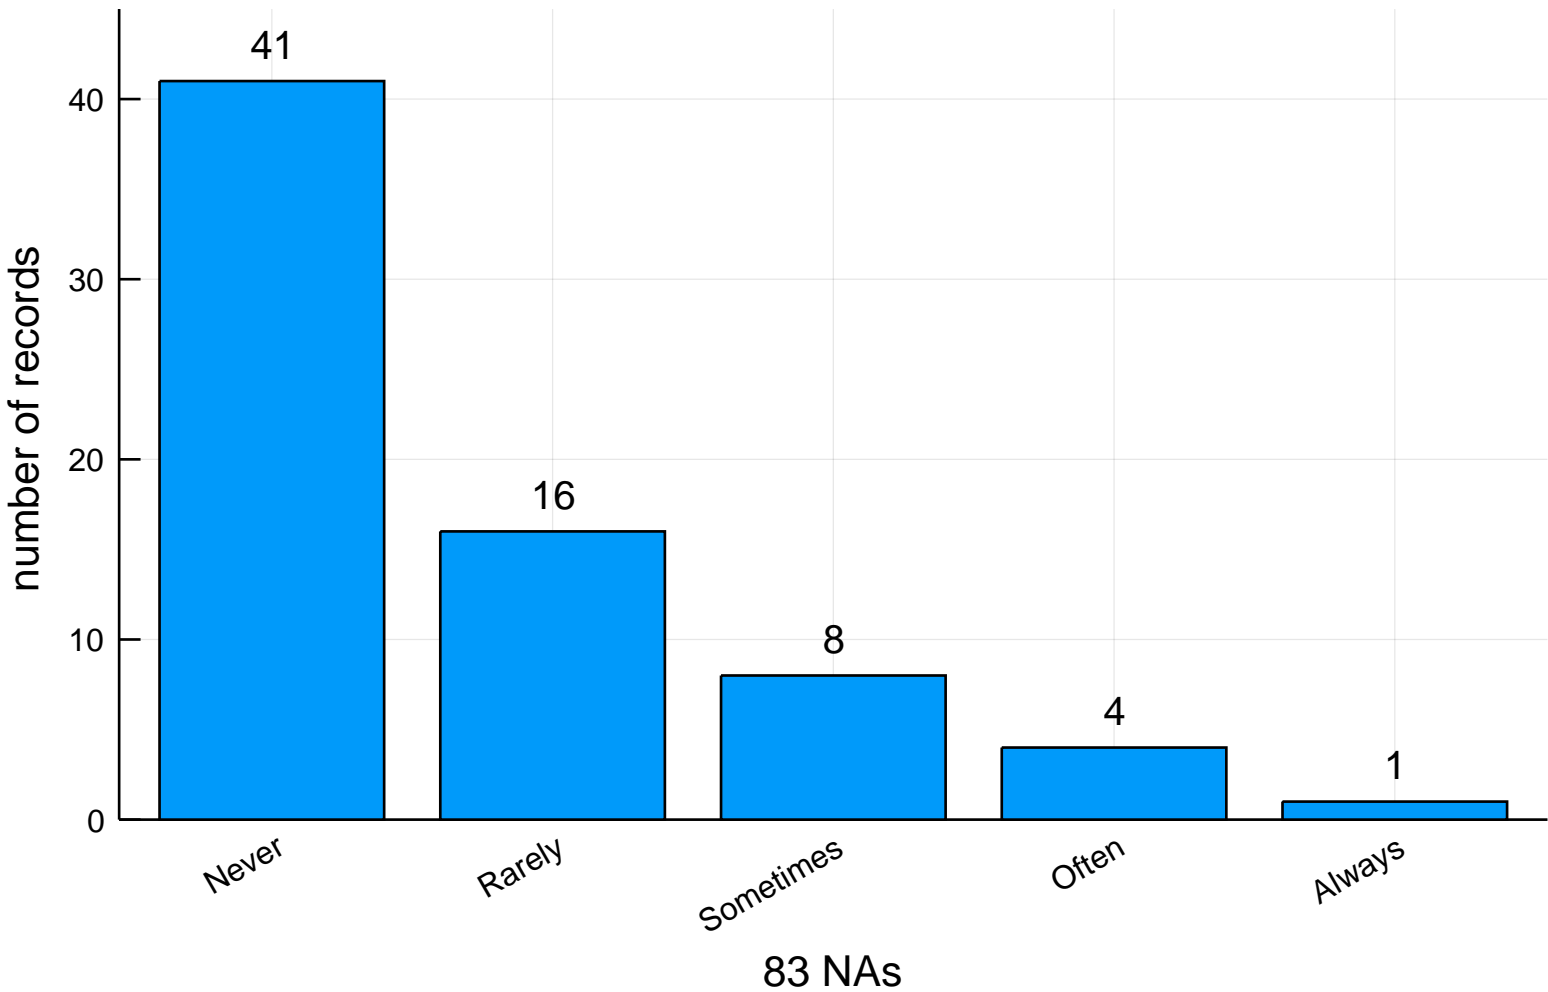

# I had a problem with my sleep (per Participant\_ID)

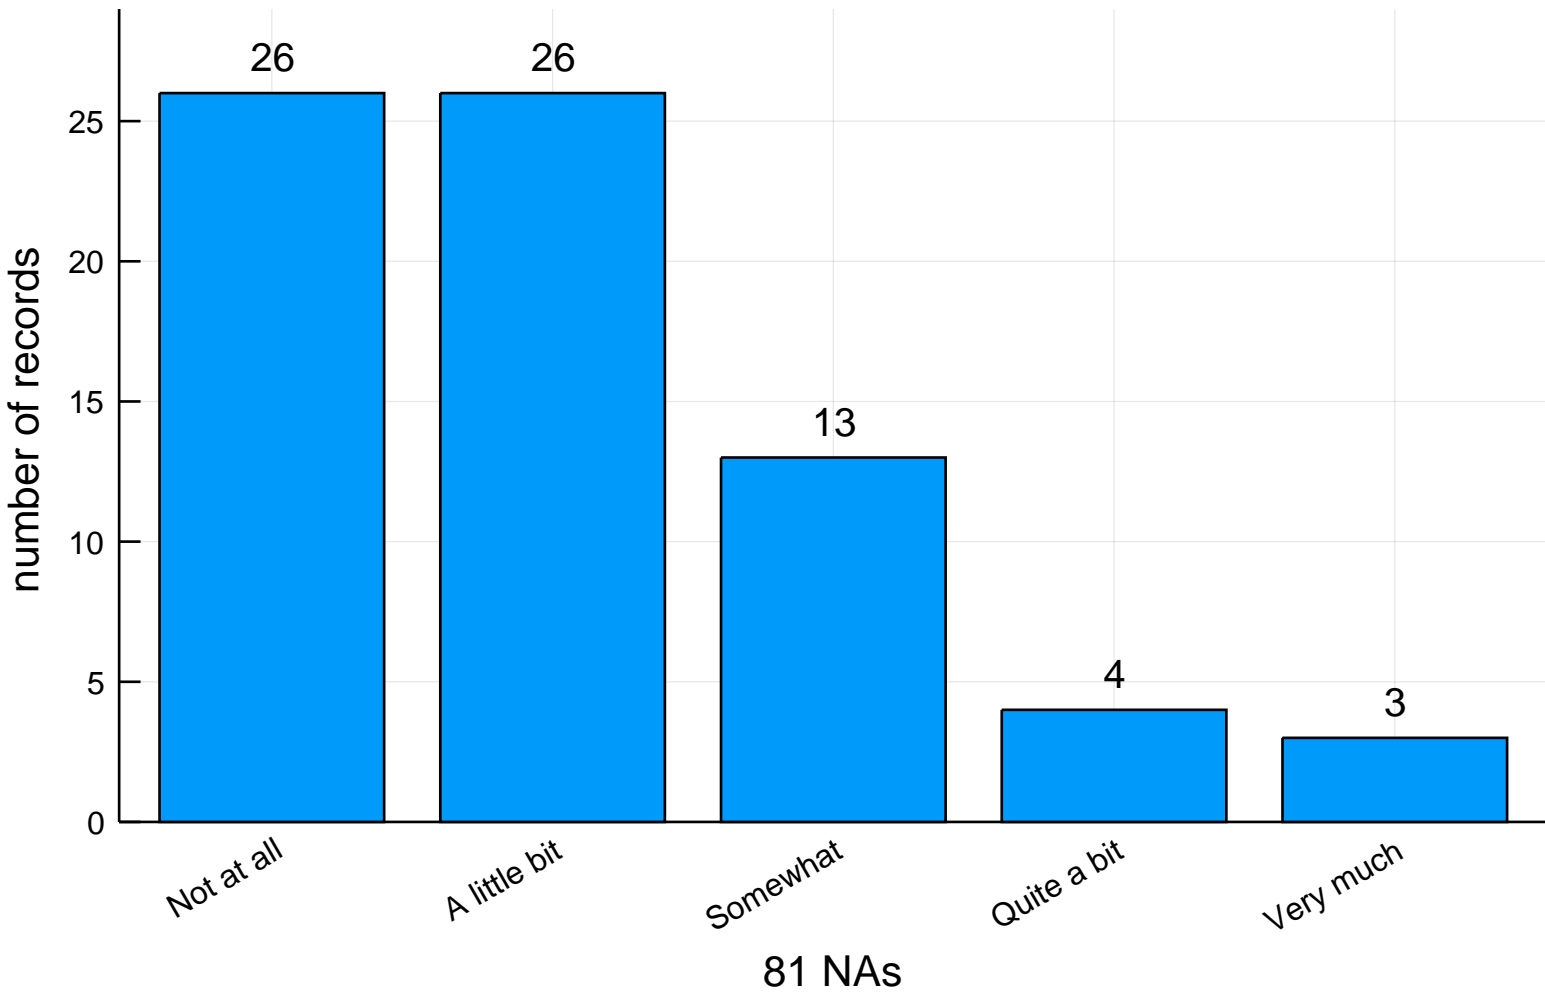

# I had difficulty falling asleep (per Participant\_ID)

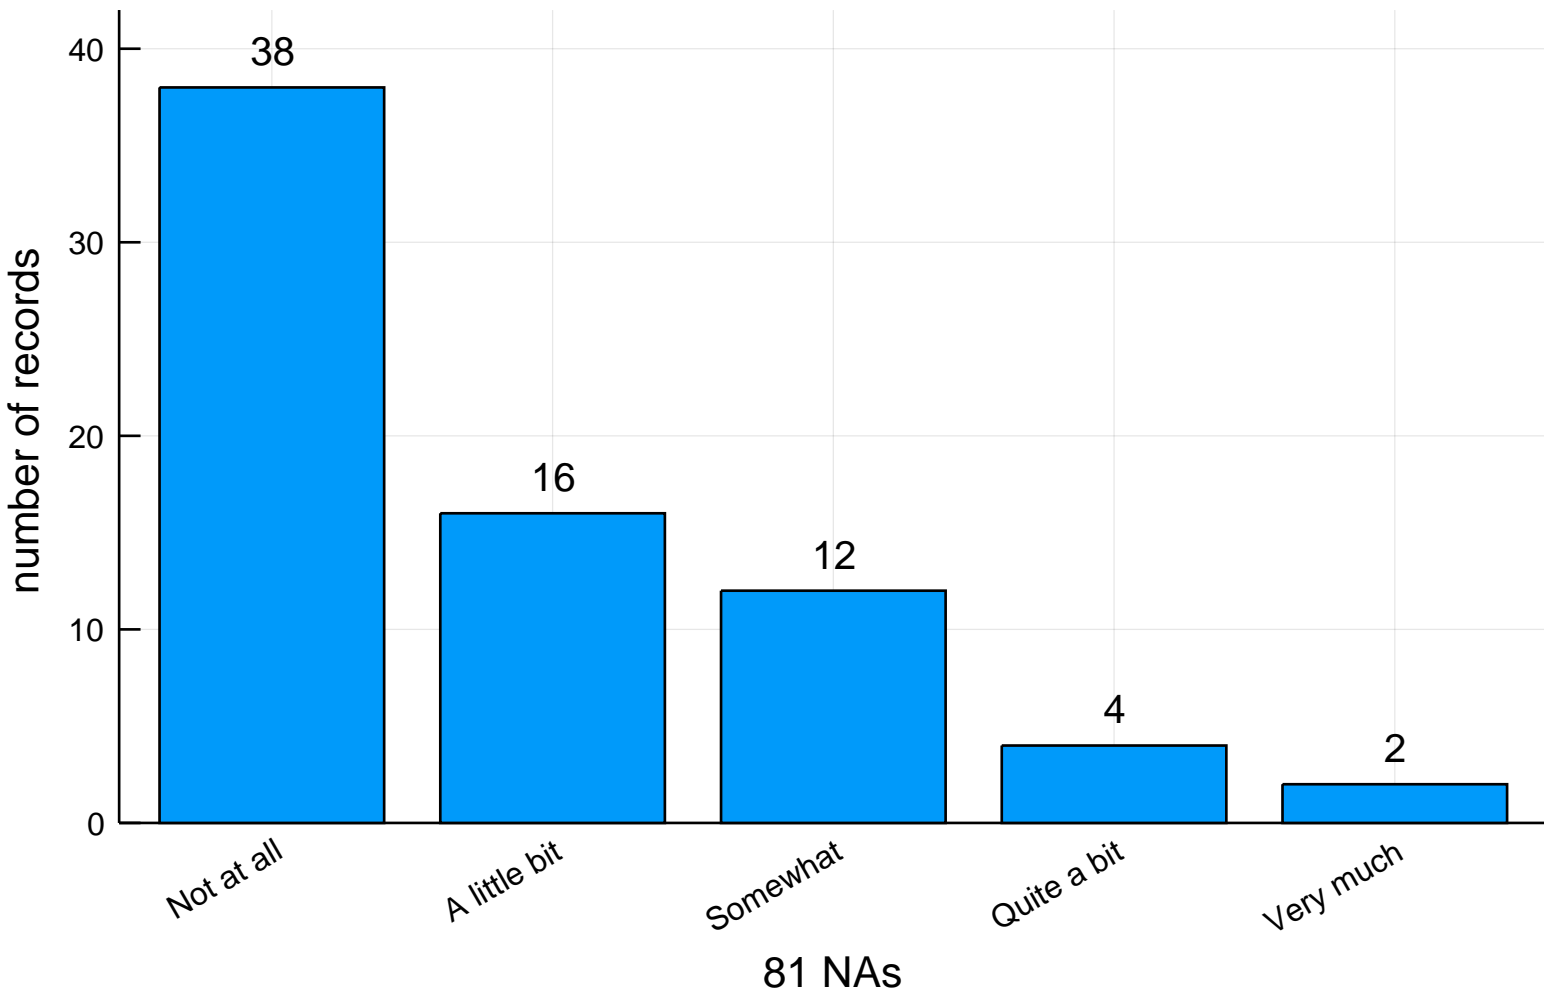



# I tried hard to get to sleep (per Participant\_ID)

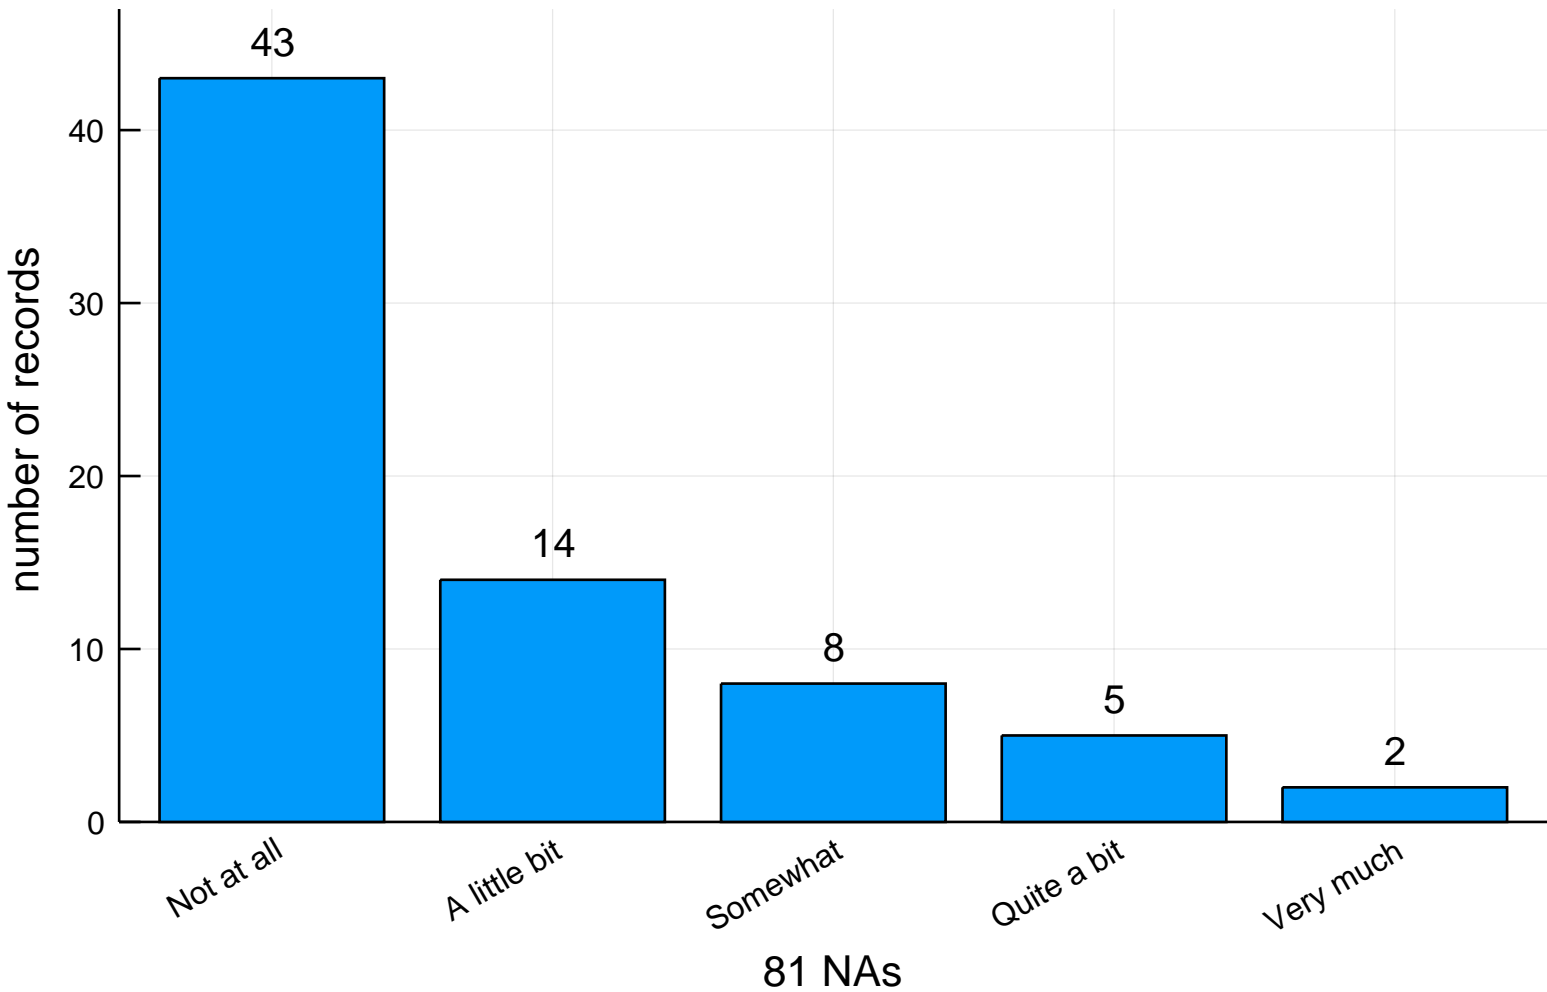

# I was satisfied with my sleep (per Participant\_ID)

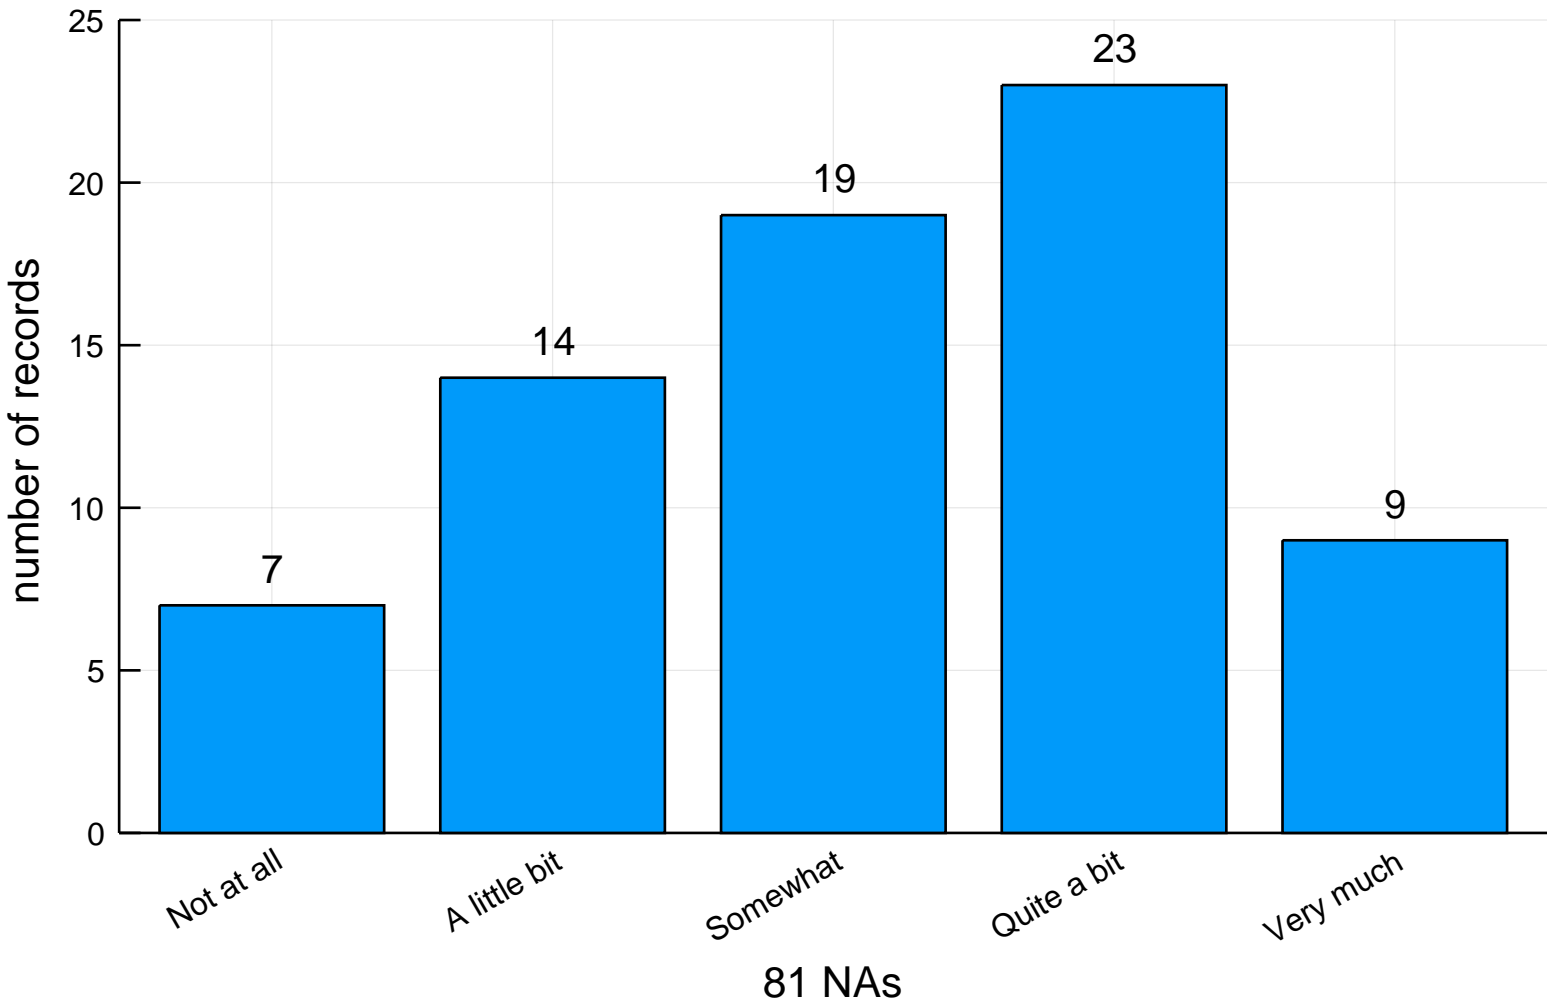

# I worried about not being able to fall a (per Participant\_ID)

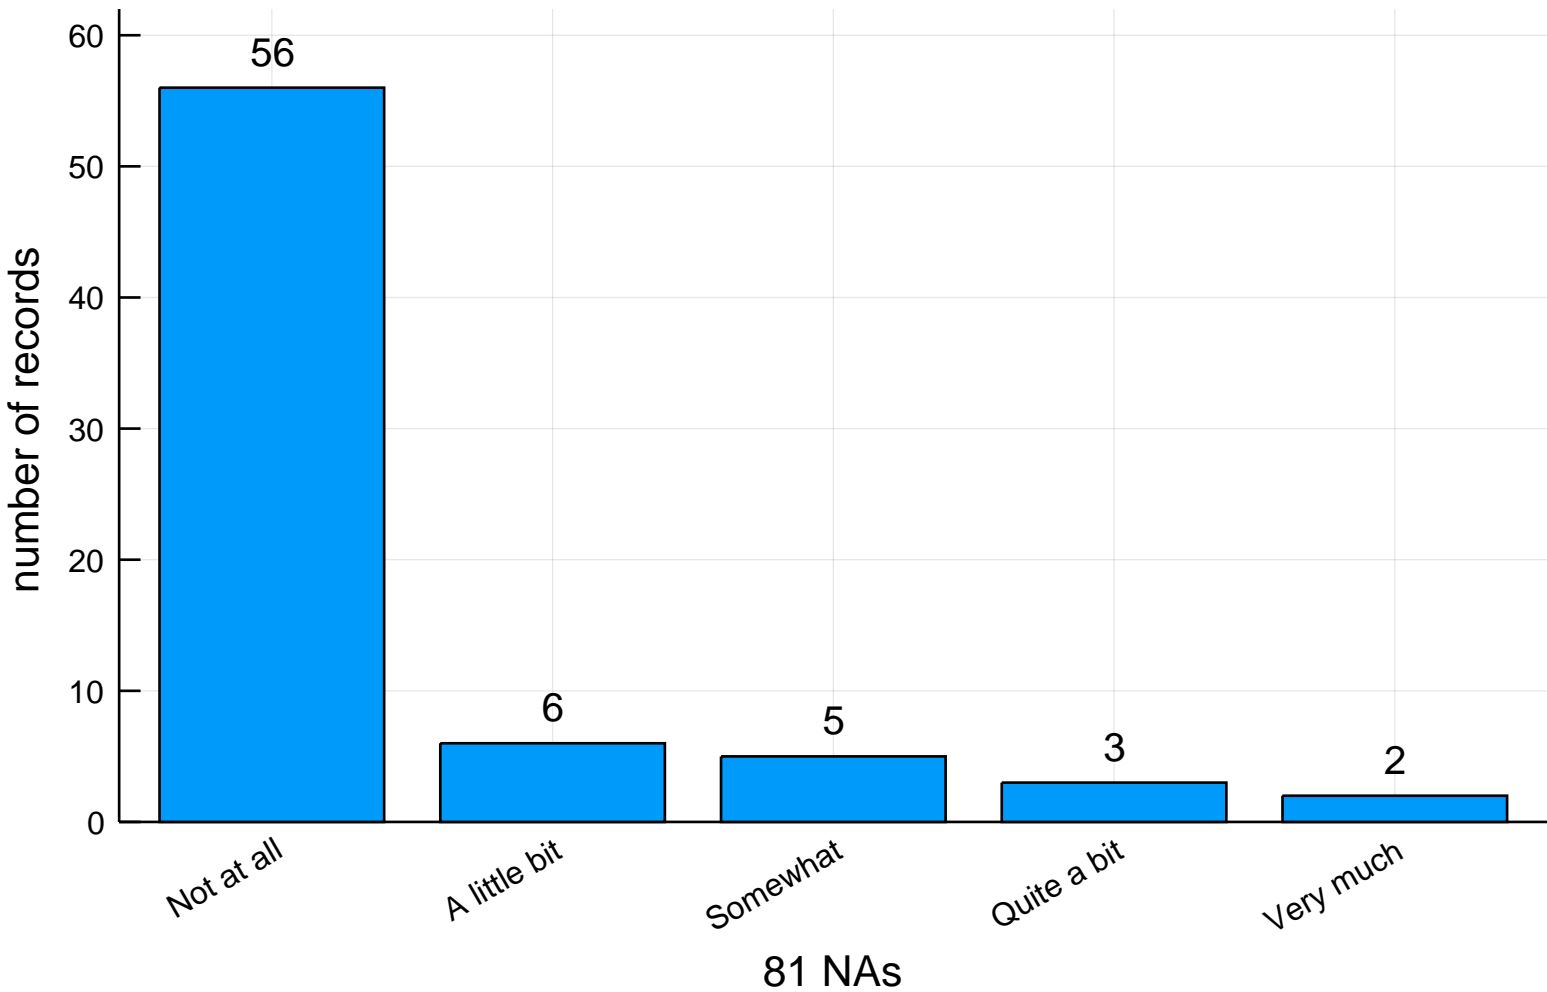

# Lanes in Aggregation (per row)

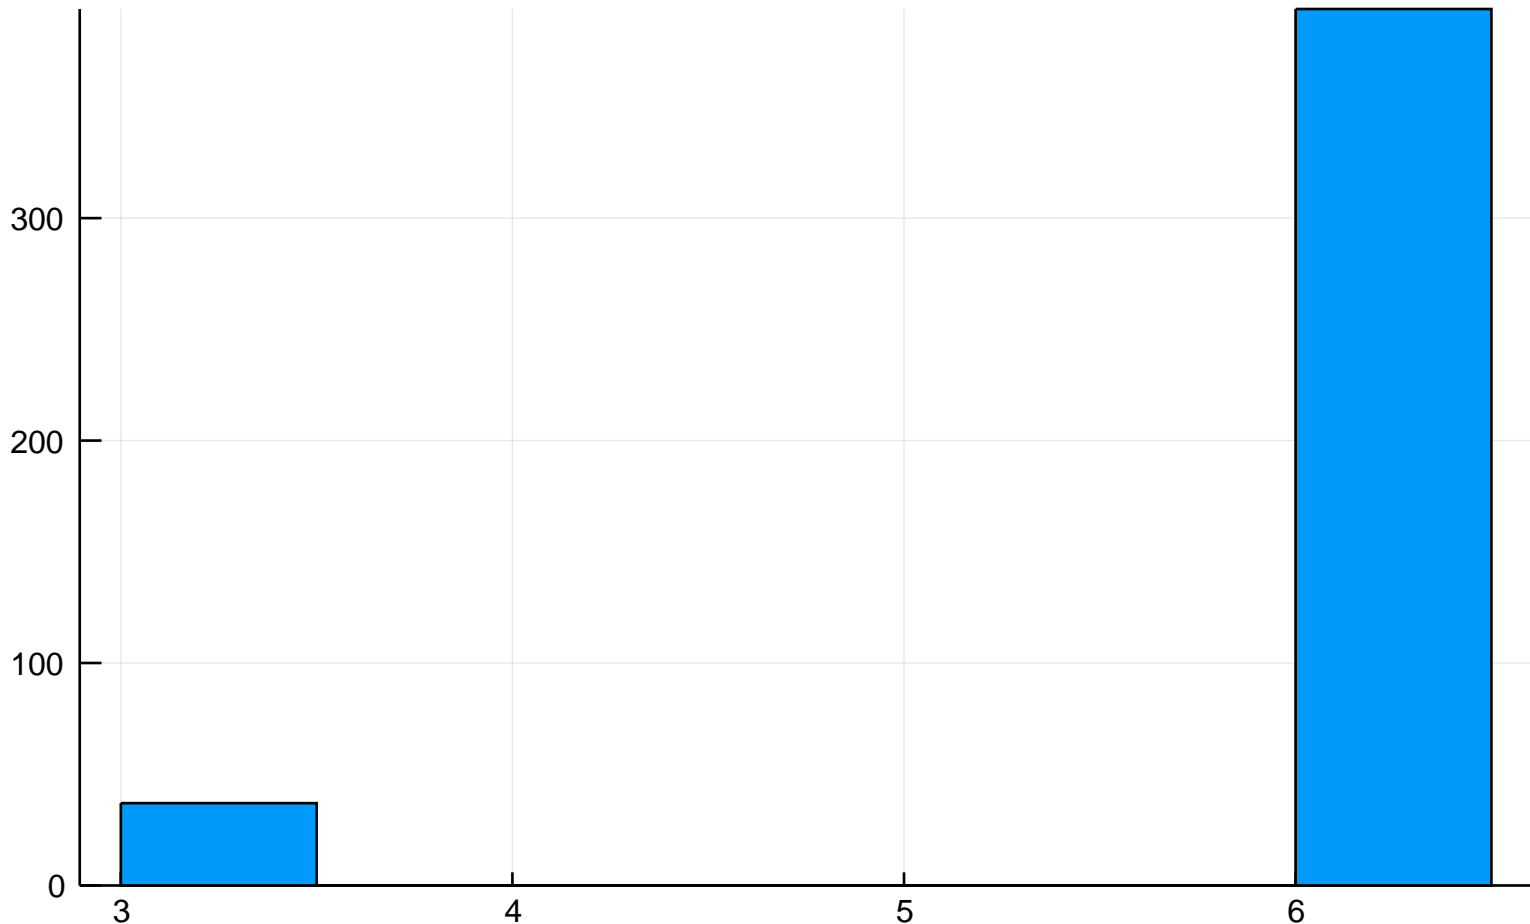

Mean: 5.74, stdev: 0.84

# LCSET (per row)

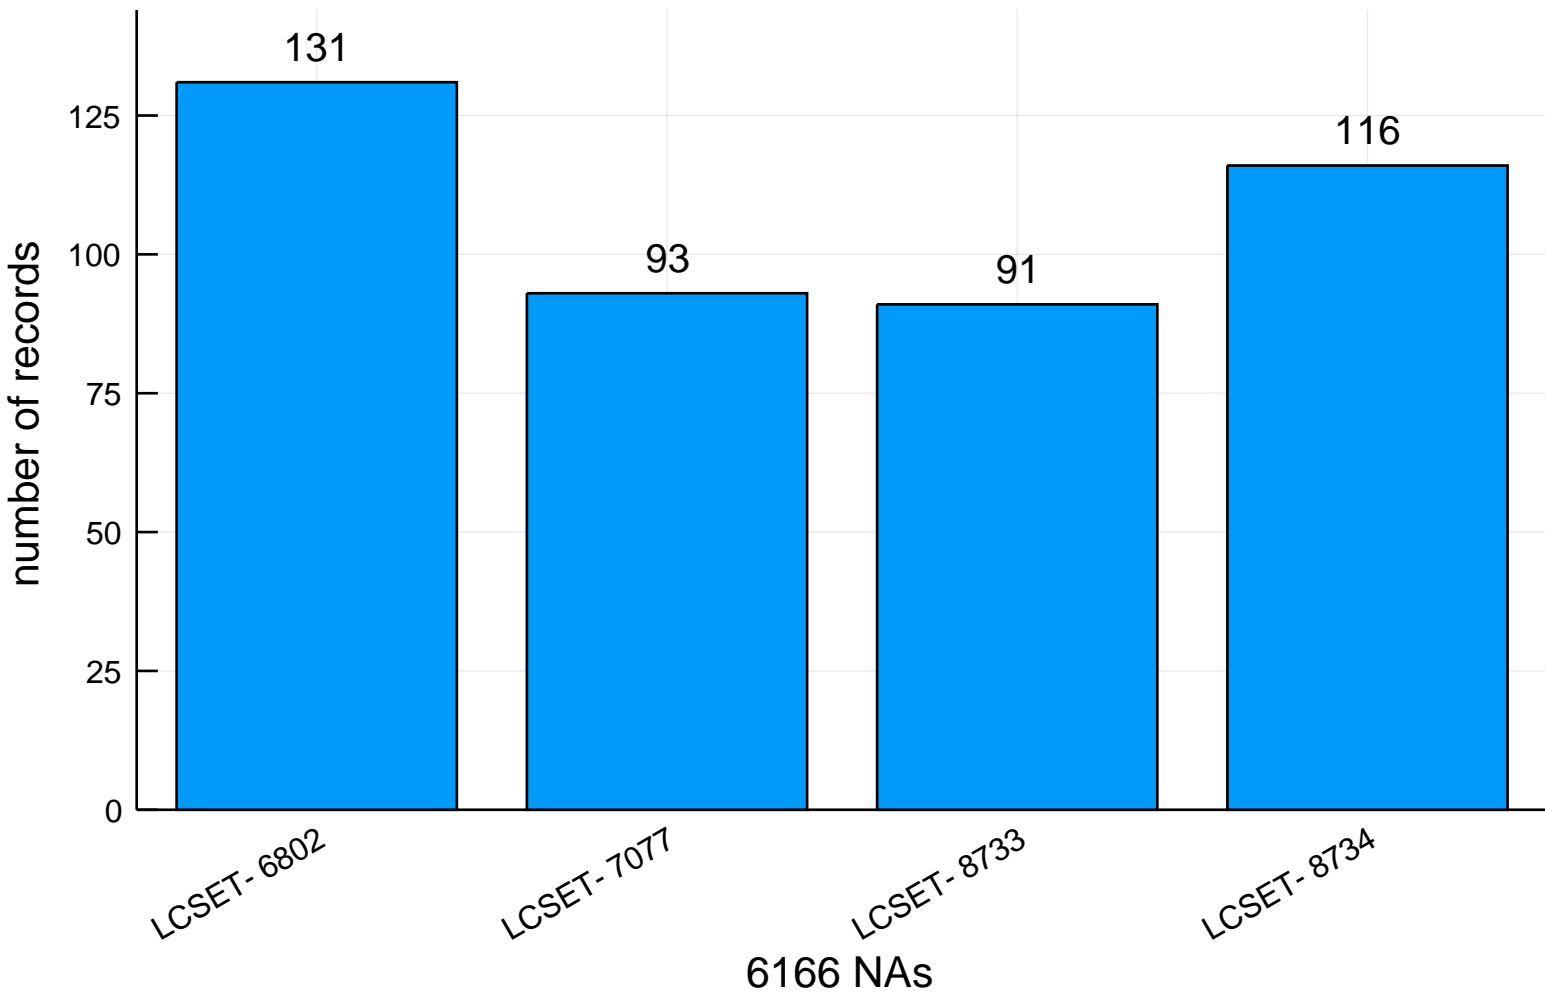

# Left Colon (per Participant\_ID)

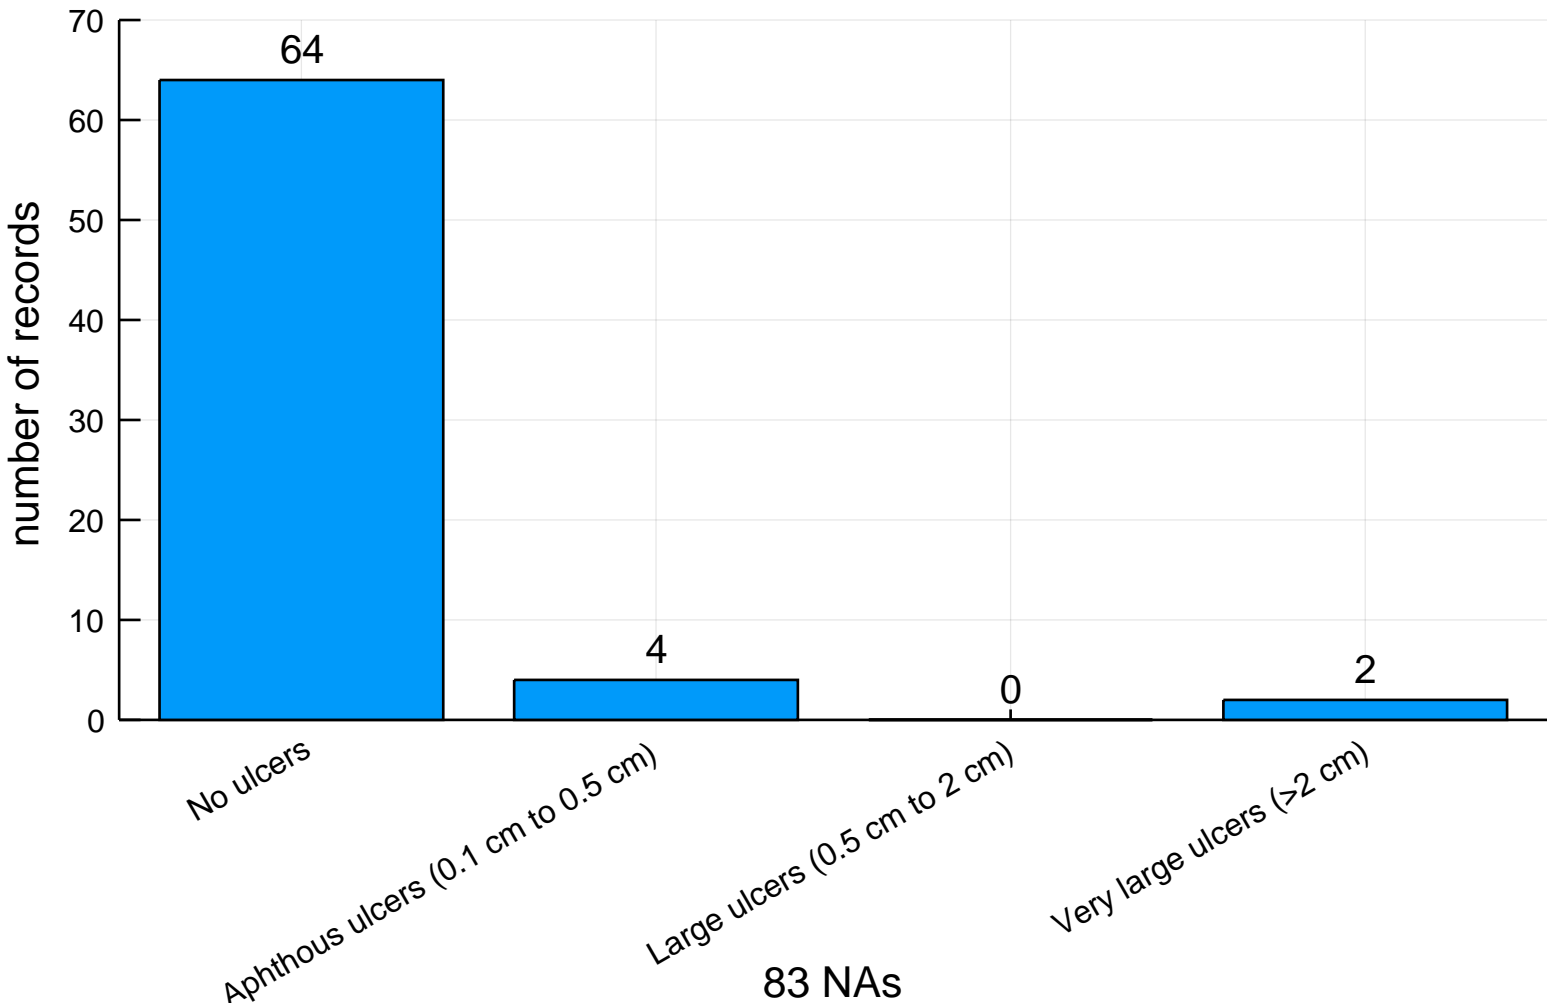

# Left Colon 1 (per site\_sub\_coll)

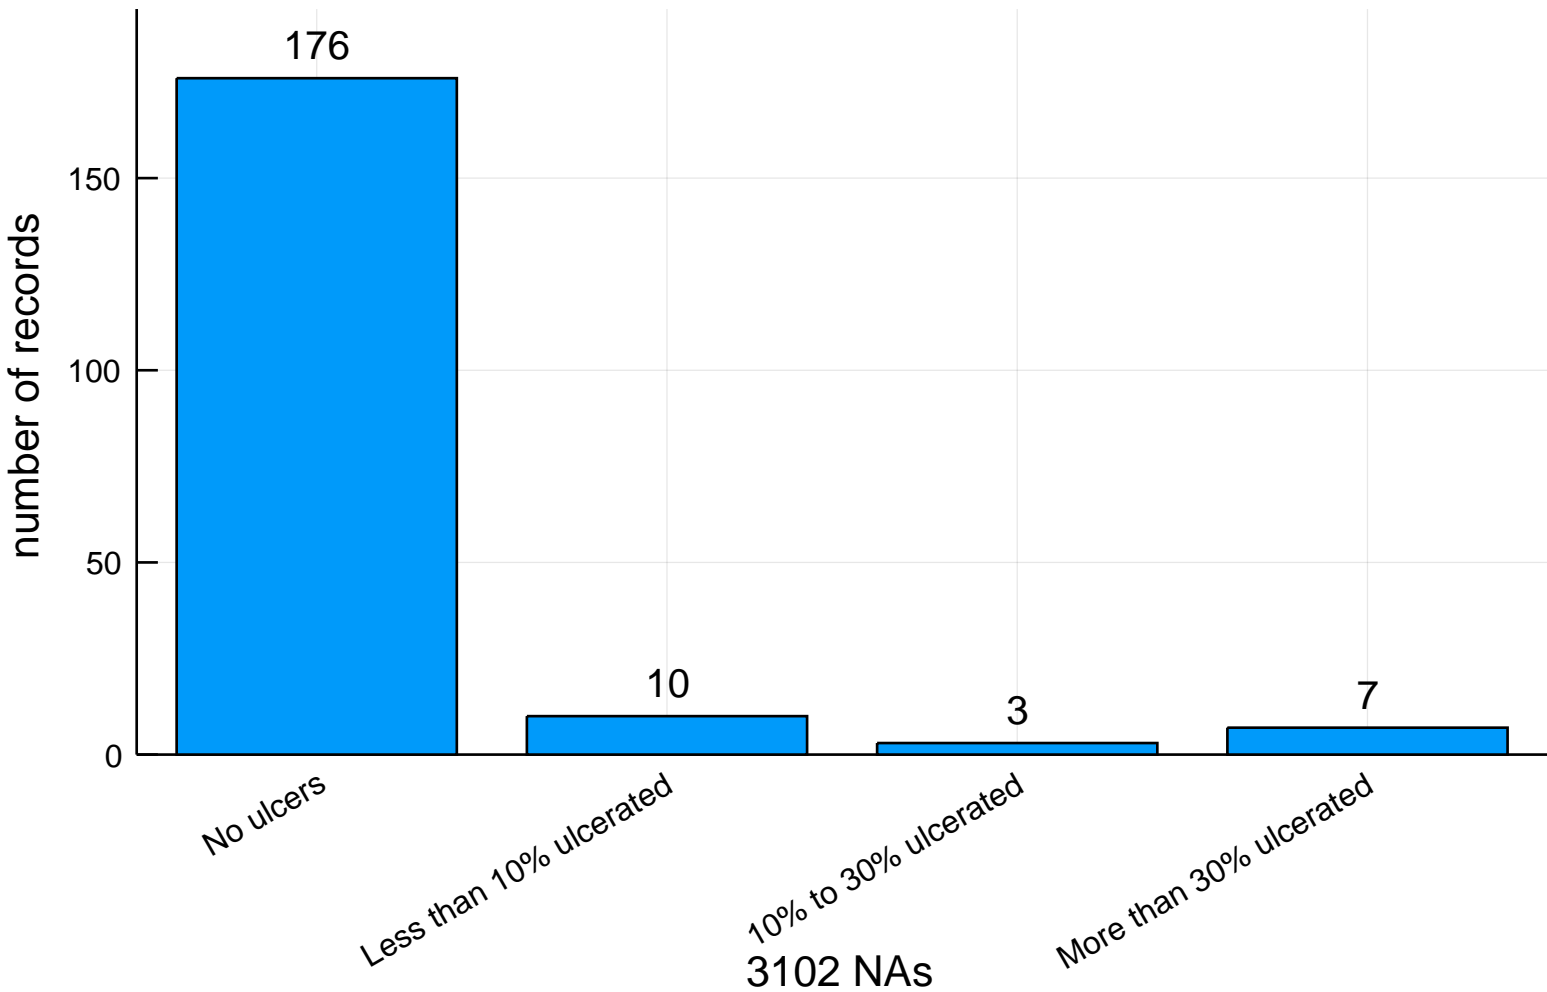

# Left Colon 2 (per site\_sub\_coll)

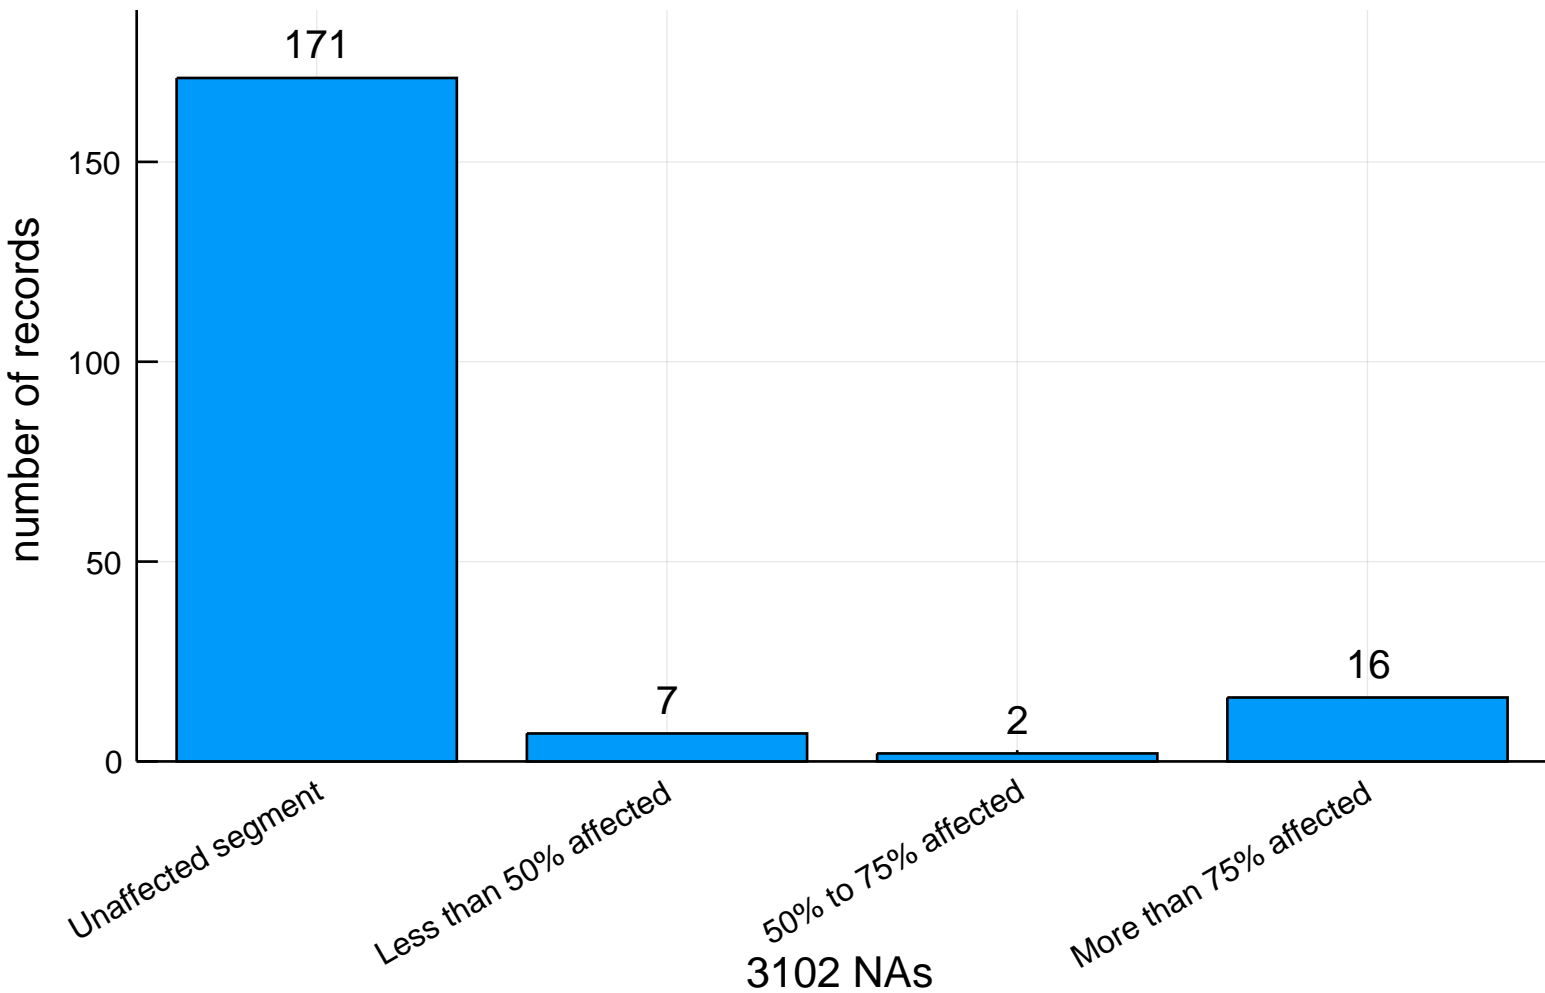



# Levaquin (per site\_sub\_coll)

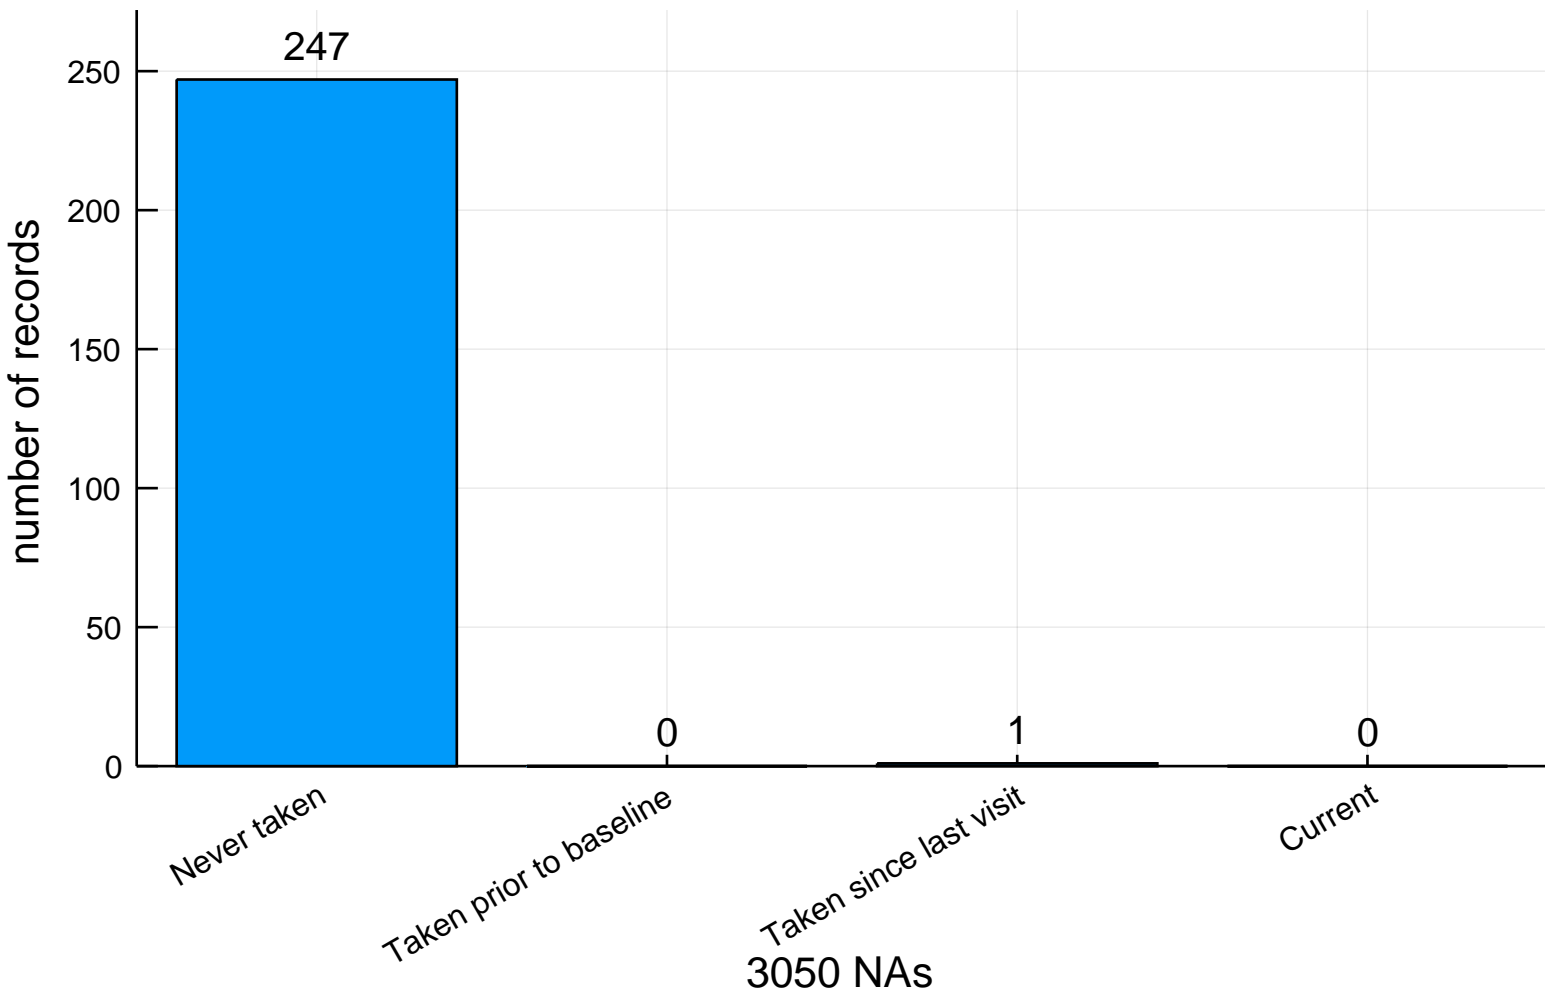

# Lialda mesalamine (per site\_sub\_coll)

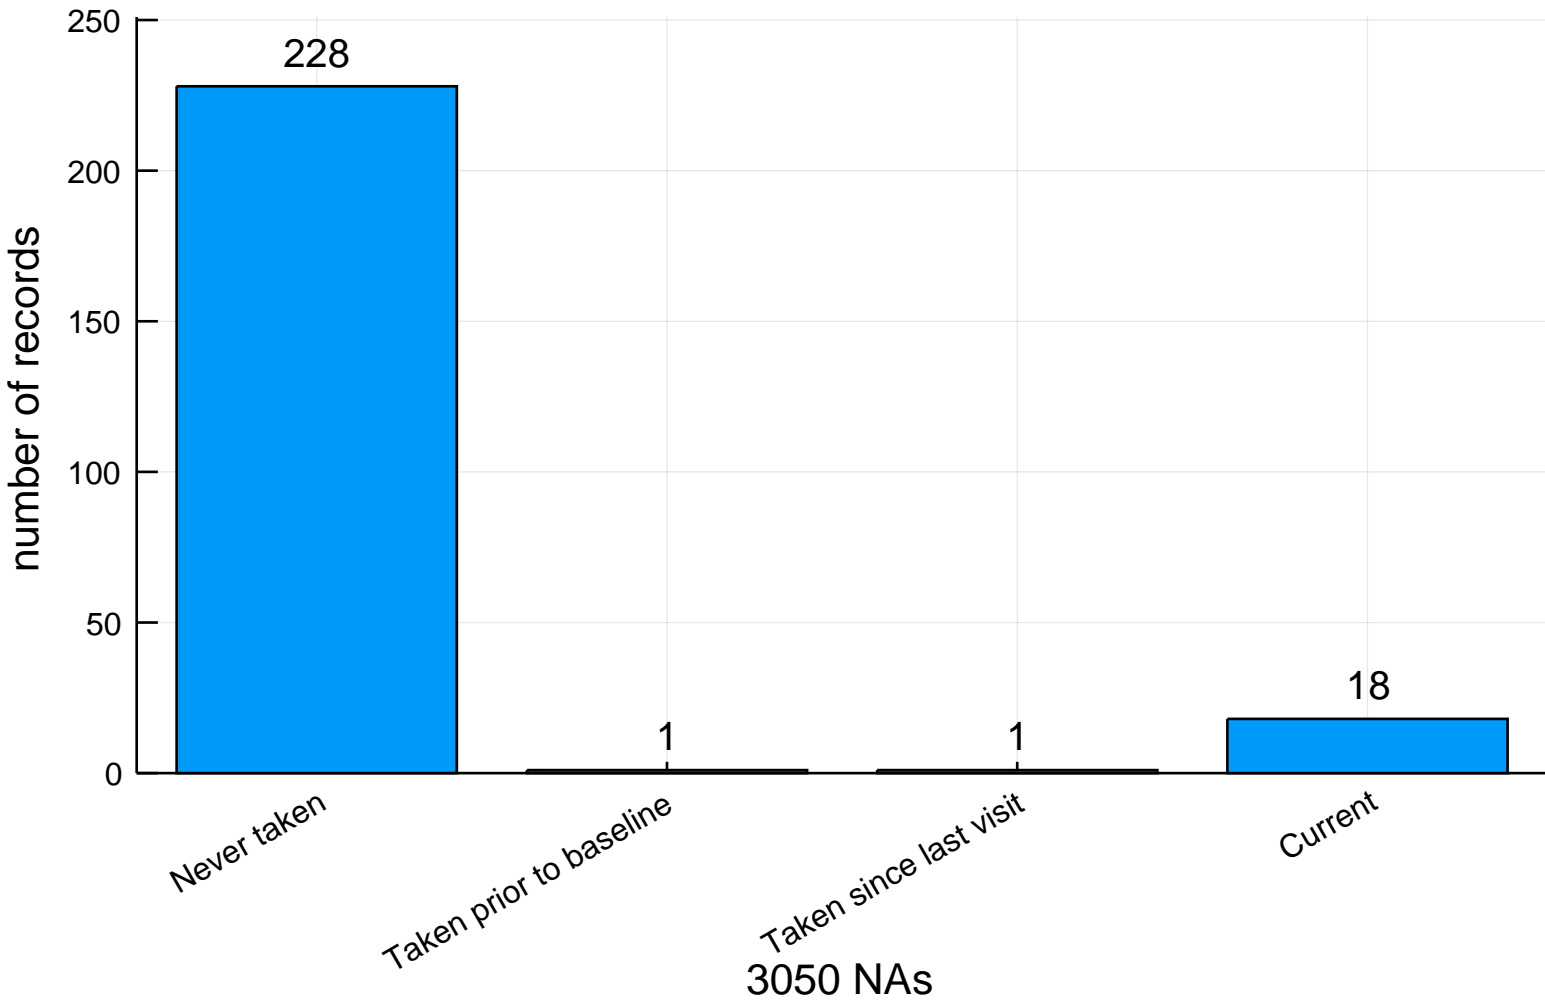

# Location (per site\_sub\_coll)

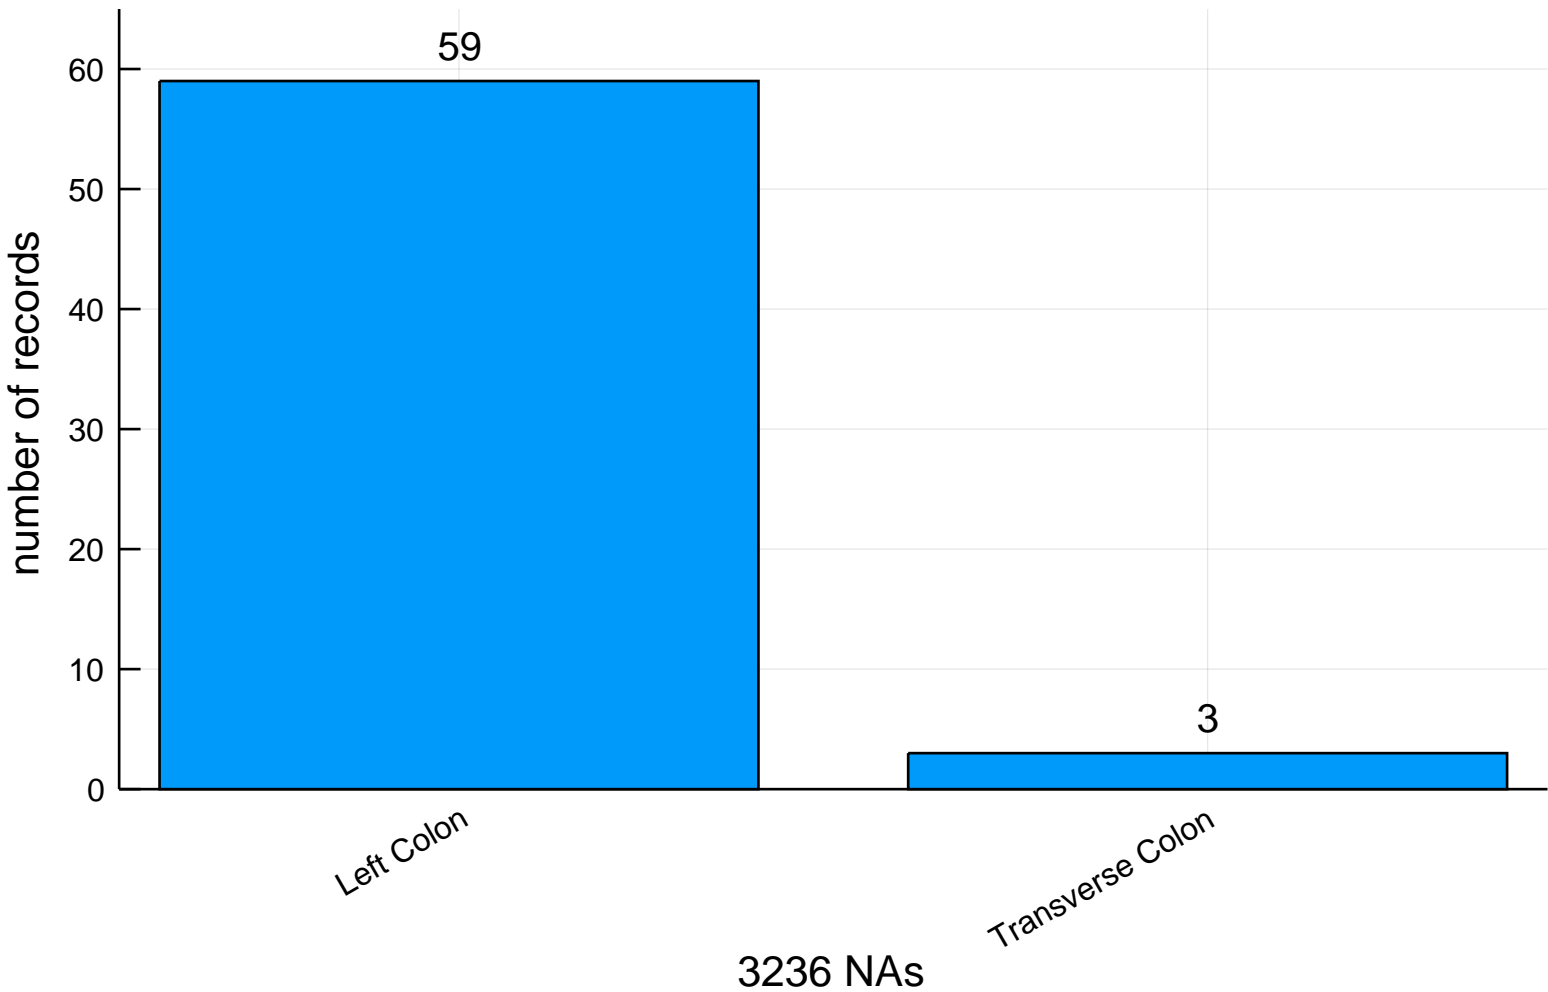

# Location 1 (per site\_sub\_coll)

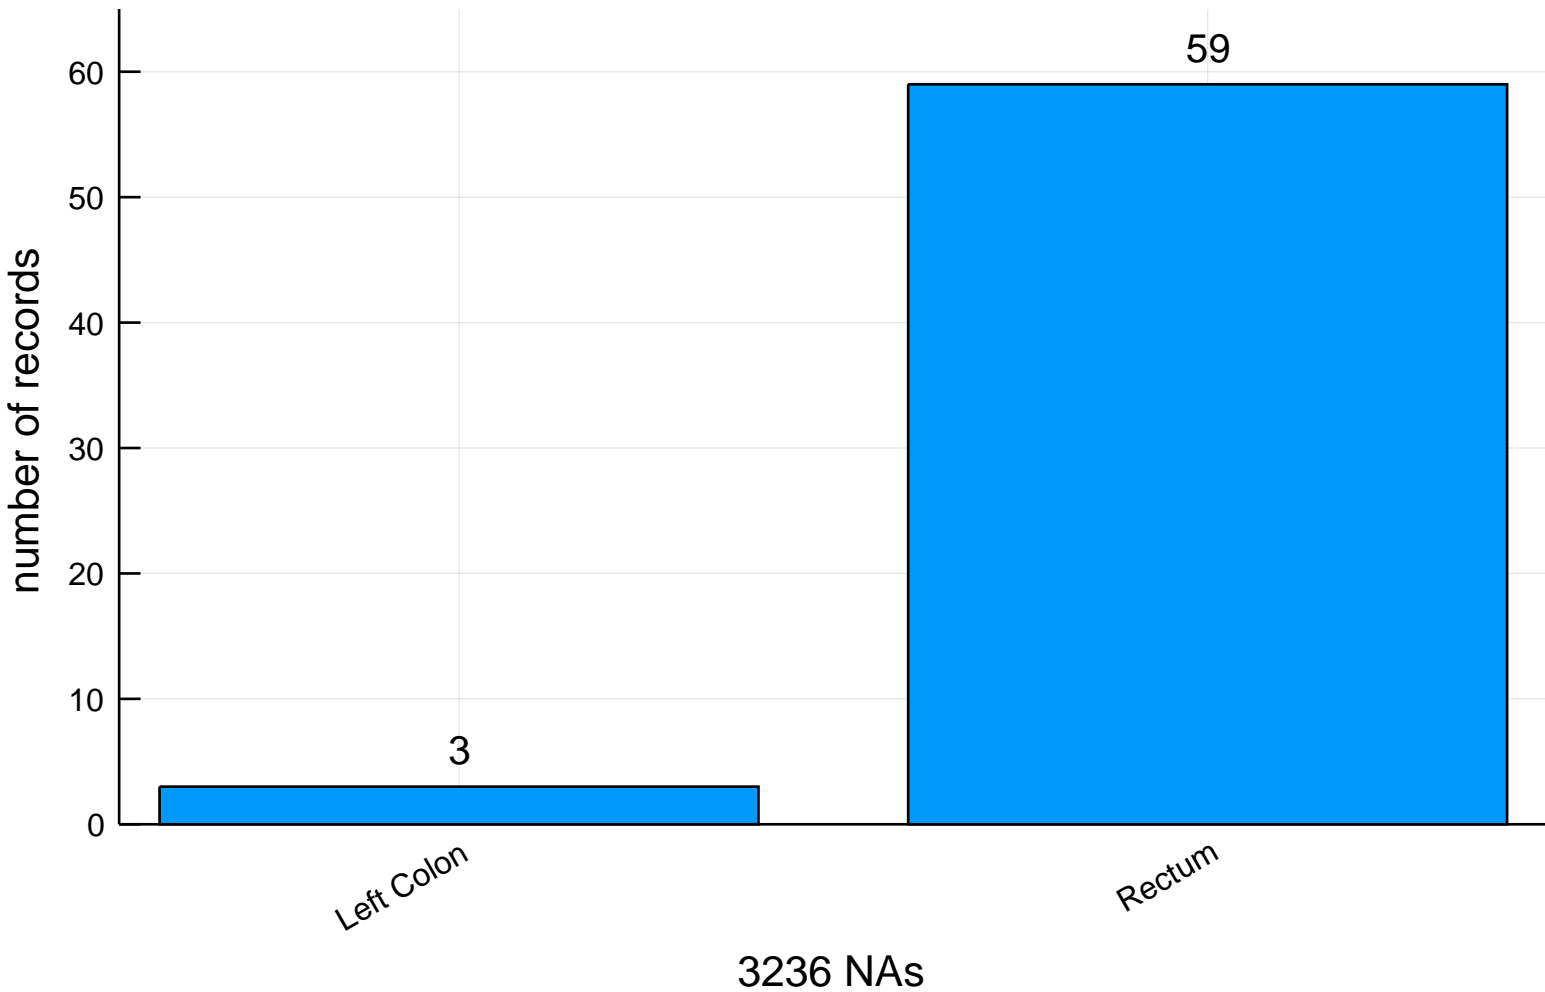

# Location 2 (per site\_sub\_coll)

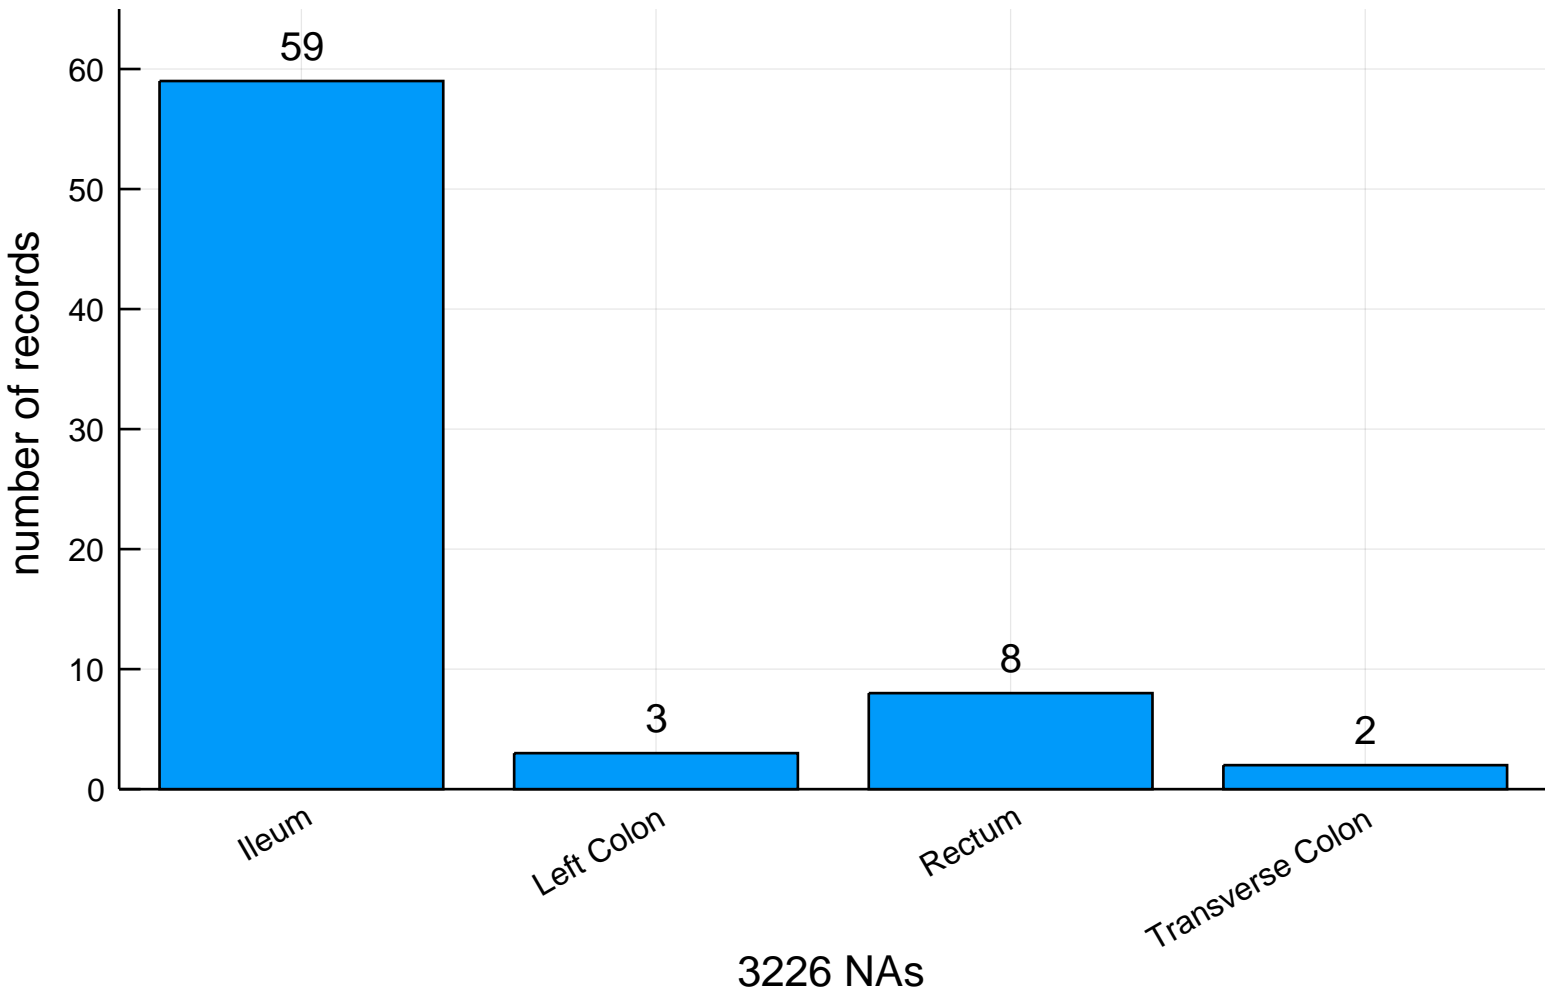

# Location 3 (per site\_sub\_coll)

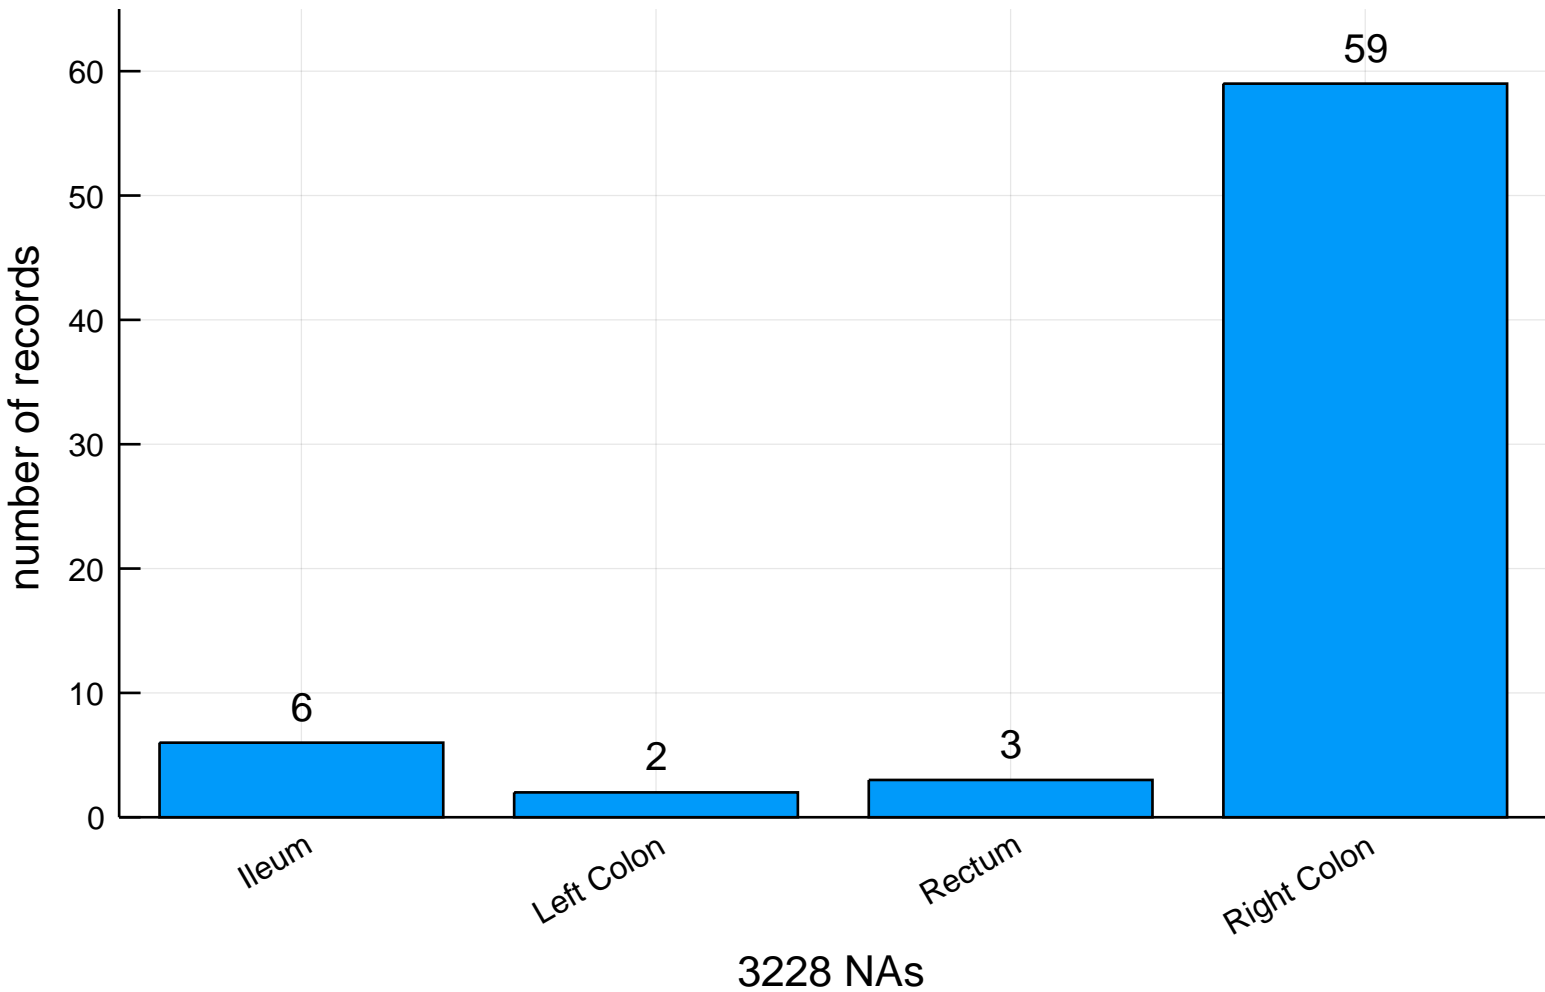

# Location 4 (per site\_sub\_coll)

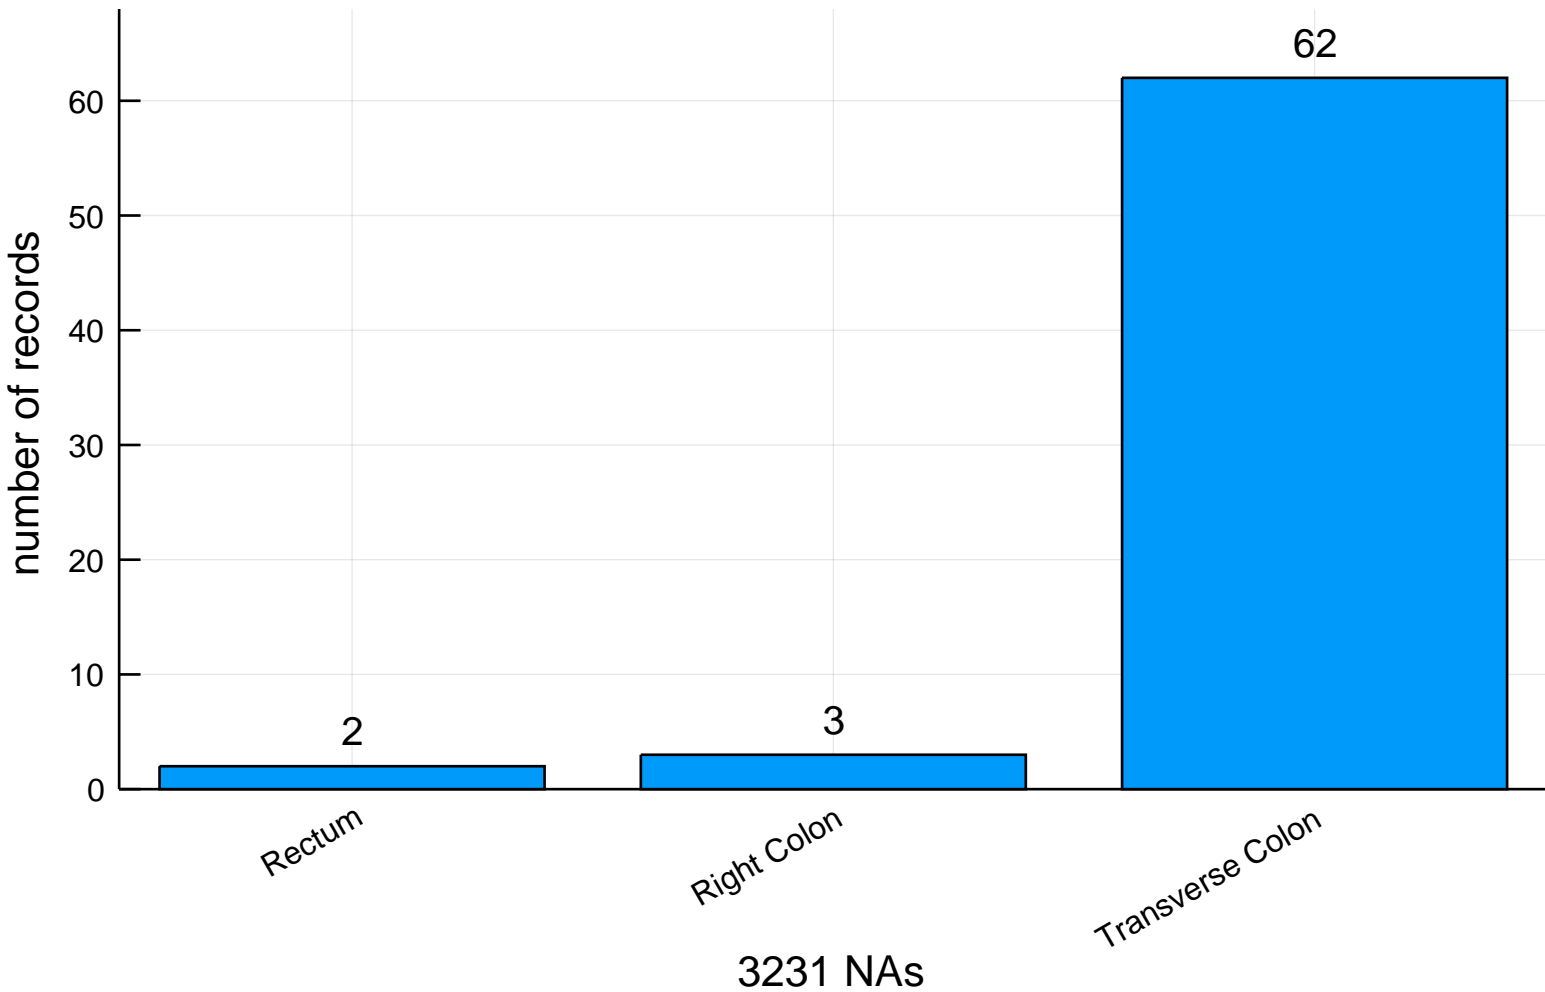

# Male distant relative 1 (per Participant\_ID)

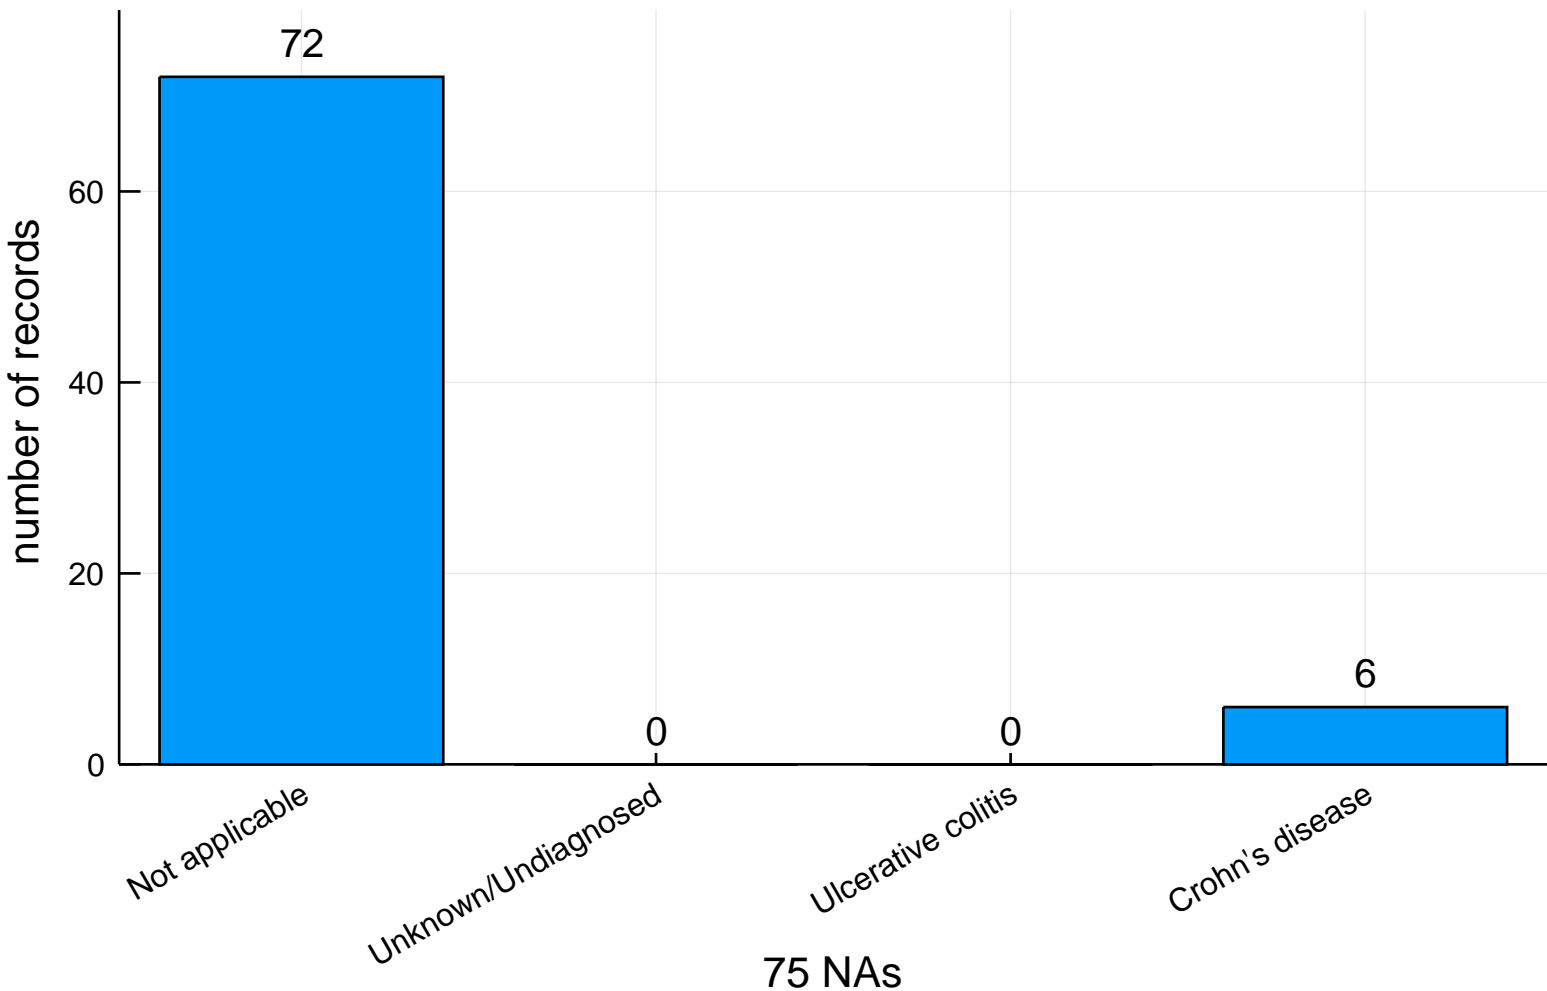



# Male distant relative 2 (per Participant\_ID)

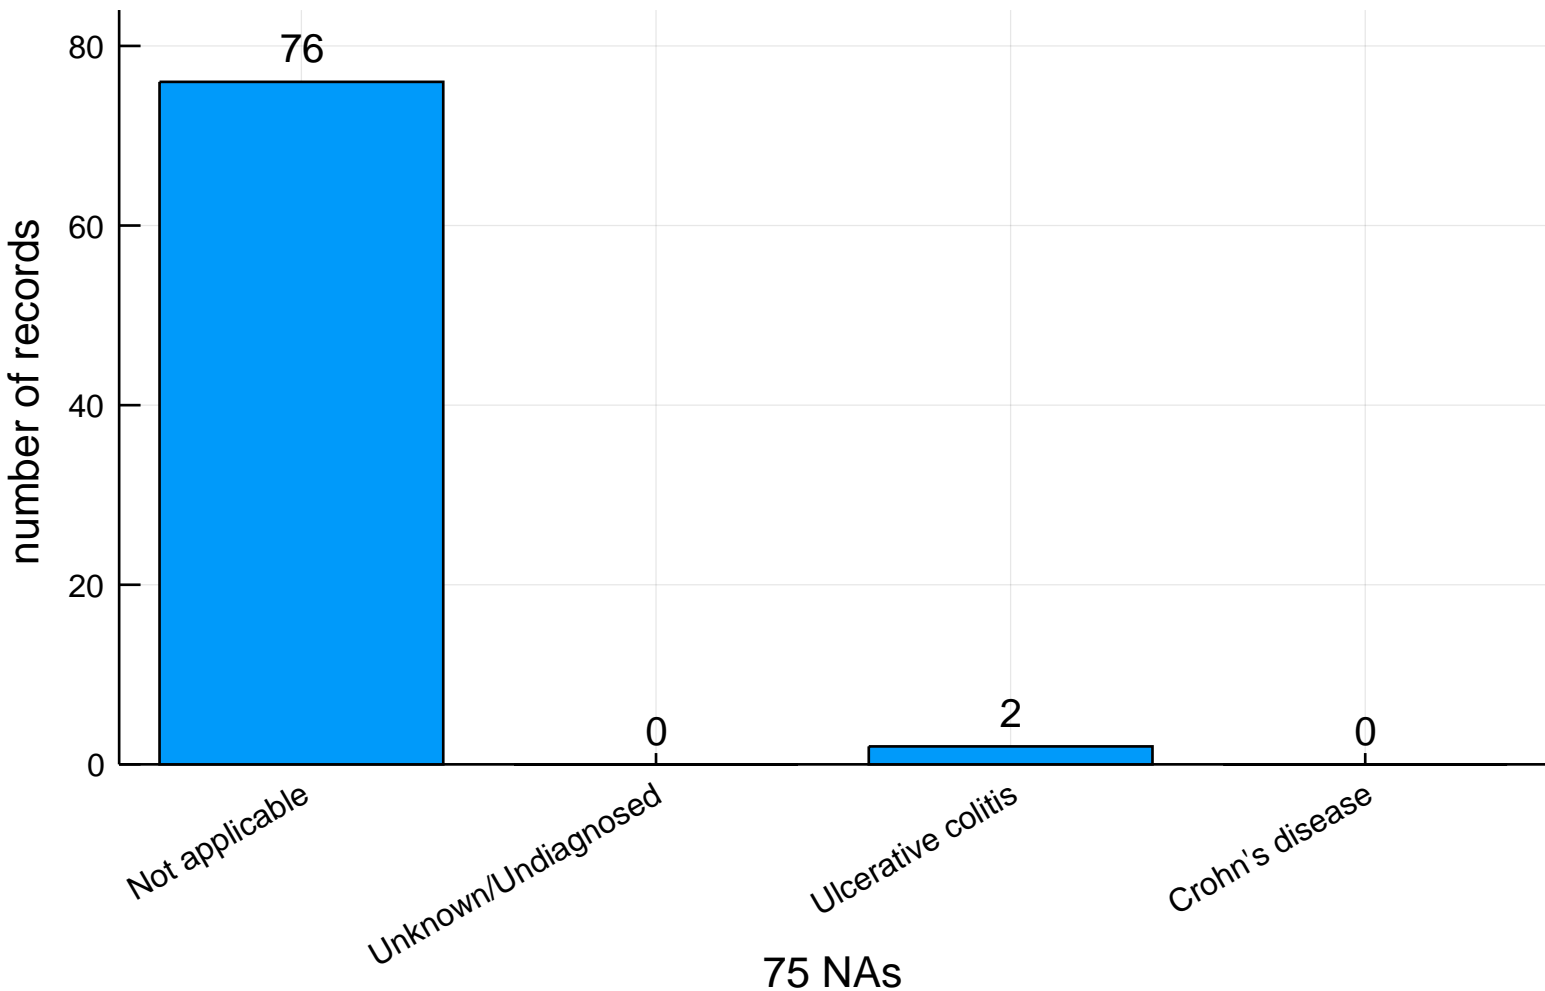

# Male distant relative 3 (per Participant\_ID)

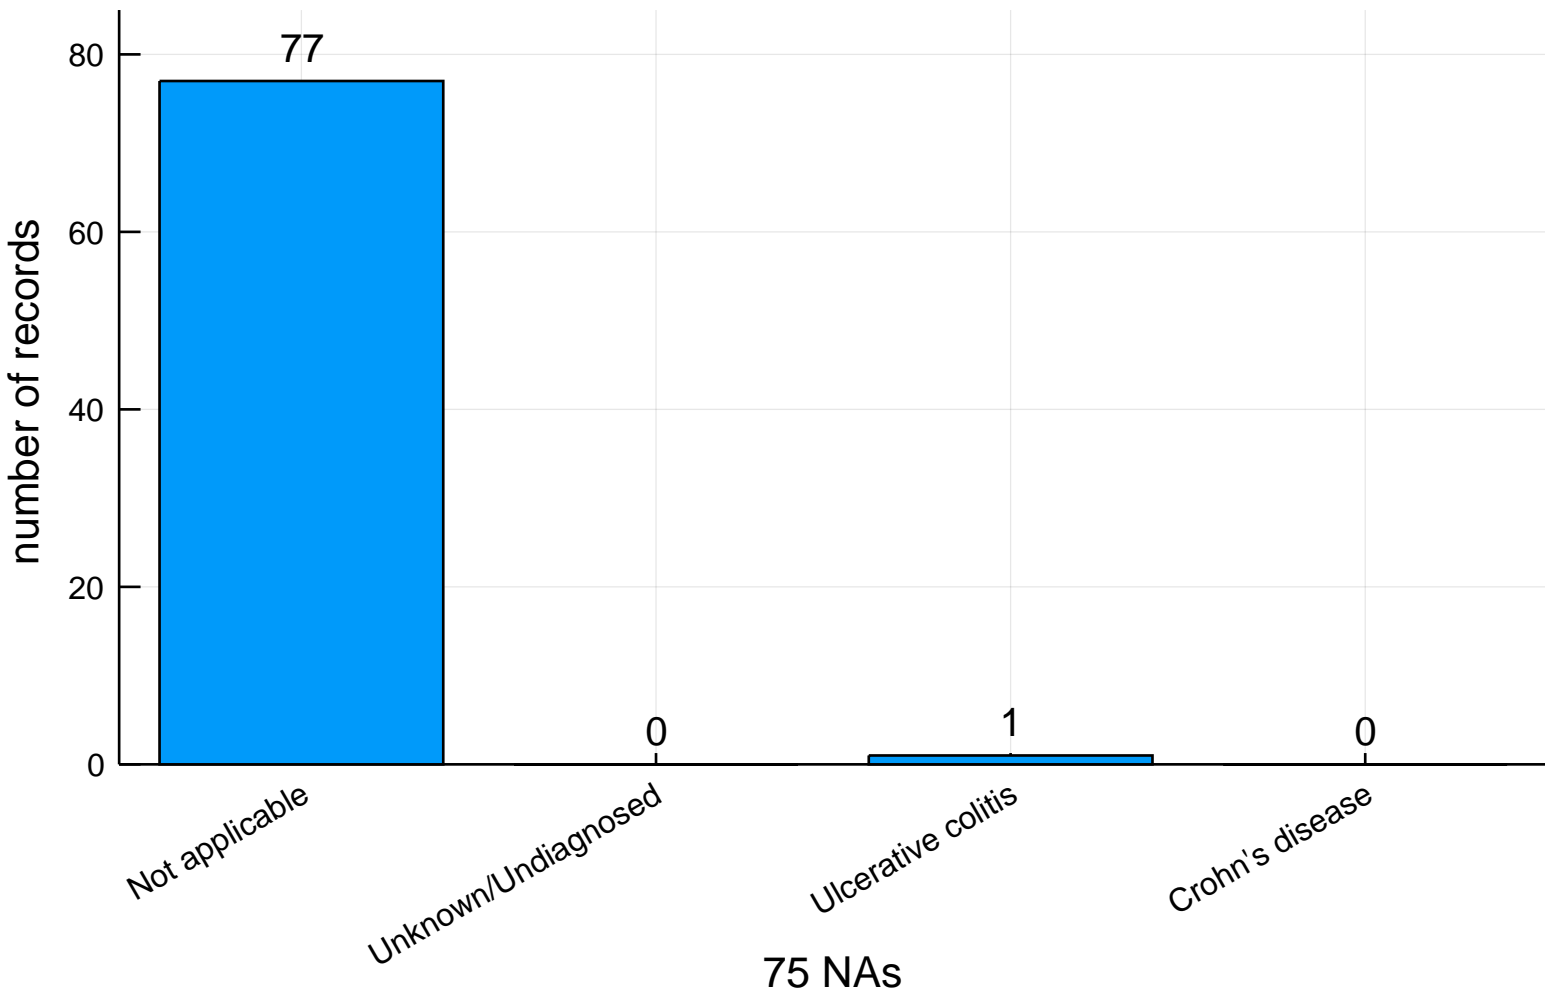

# Male grandparent 1 (per Participant\_ID)

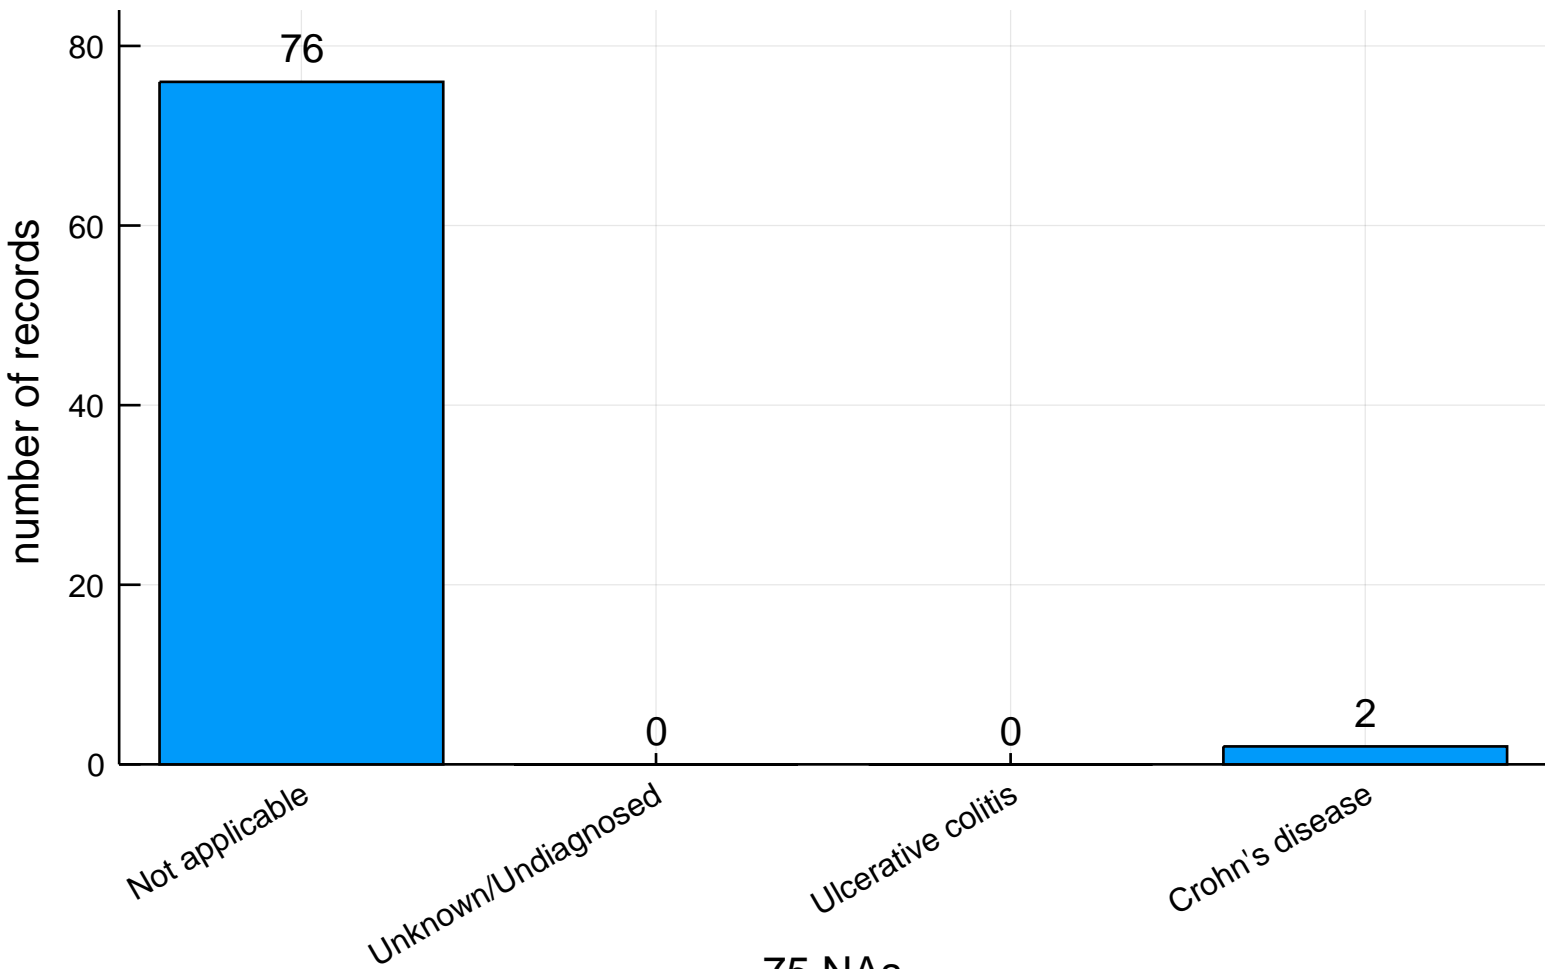

75 NAs

# Male sibling 1 (per Participant\_ID)

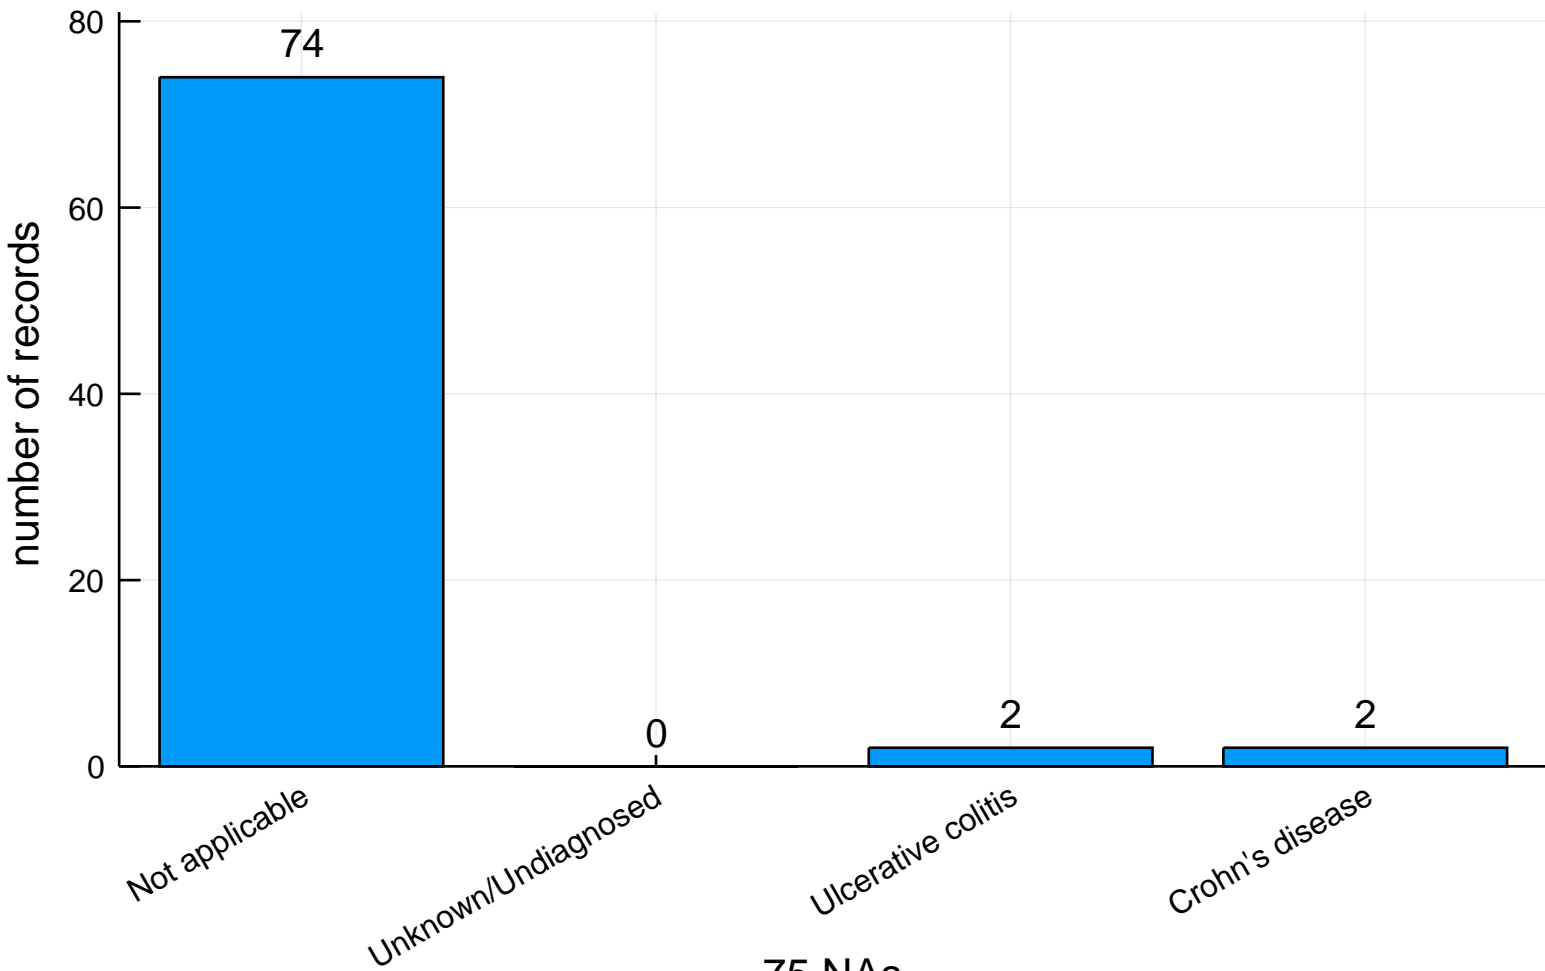

# Manual toothbrush (per Participant\_ID)

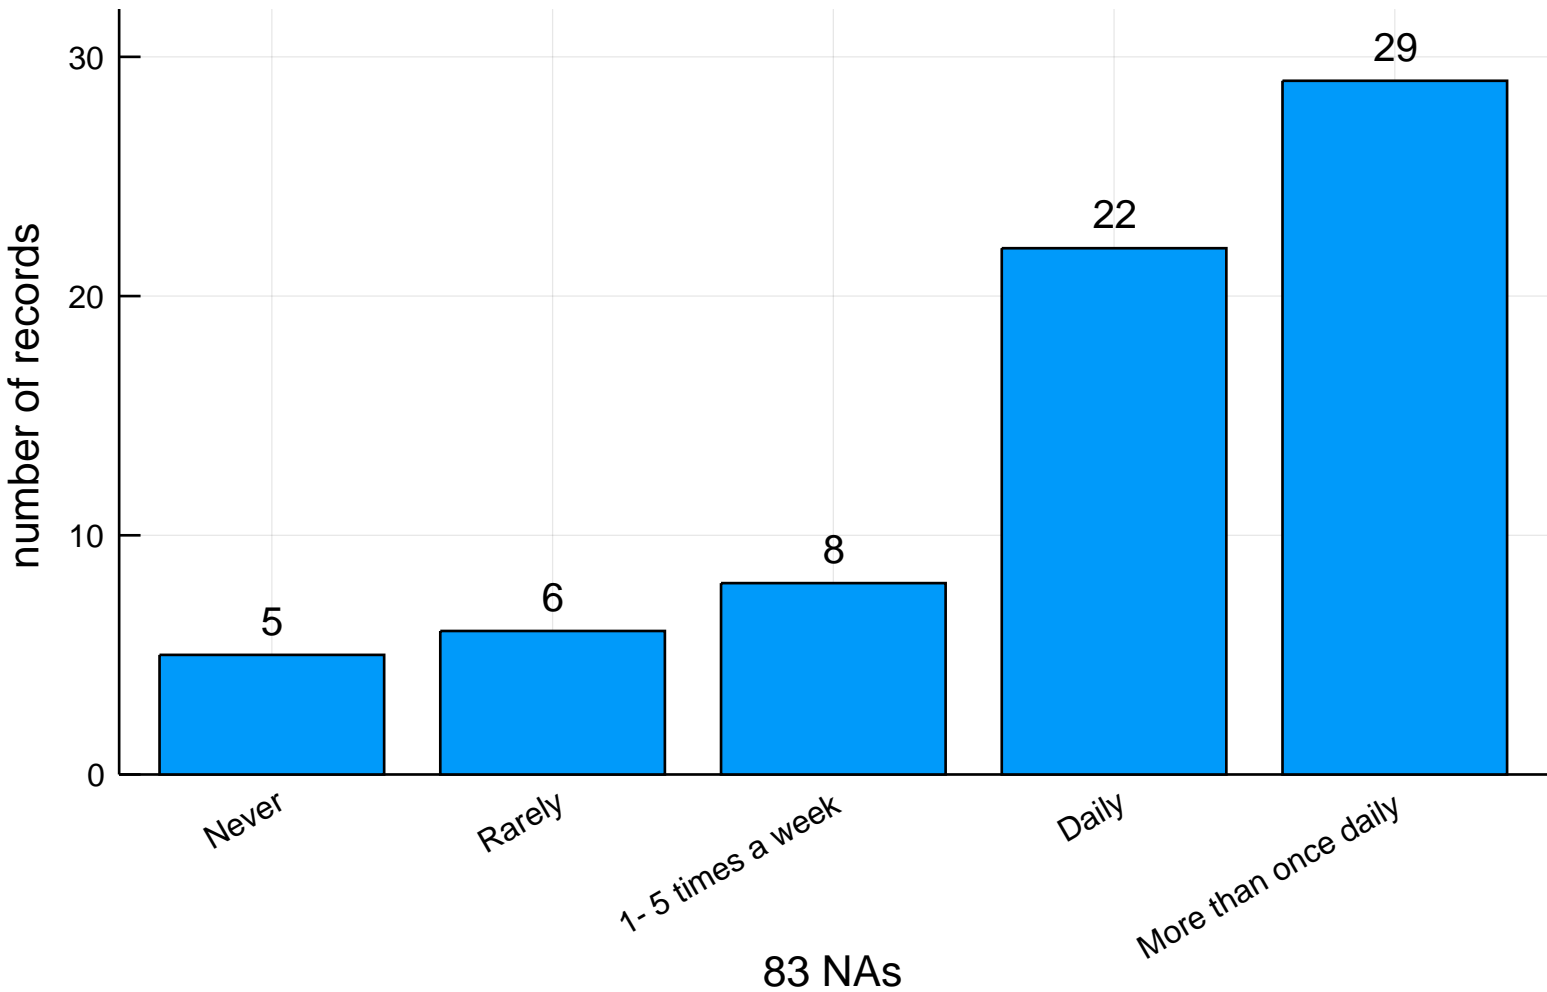

# Mercaptopurine Purinethol 6MP (per site\_sub\_coll)

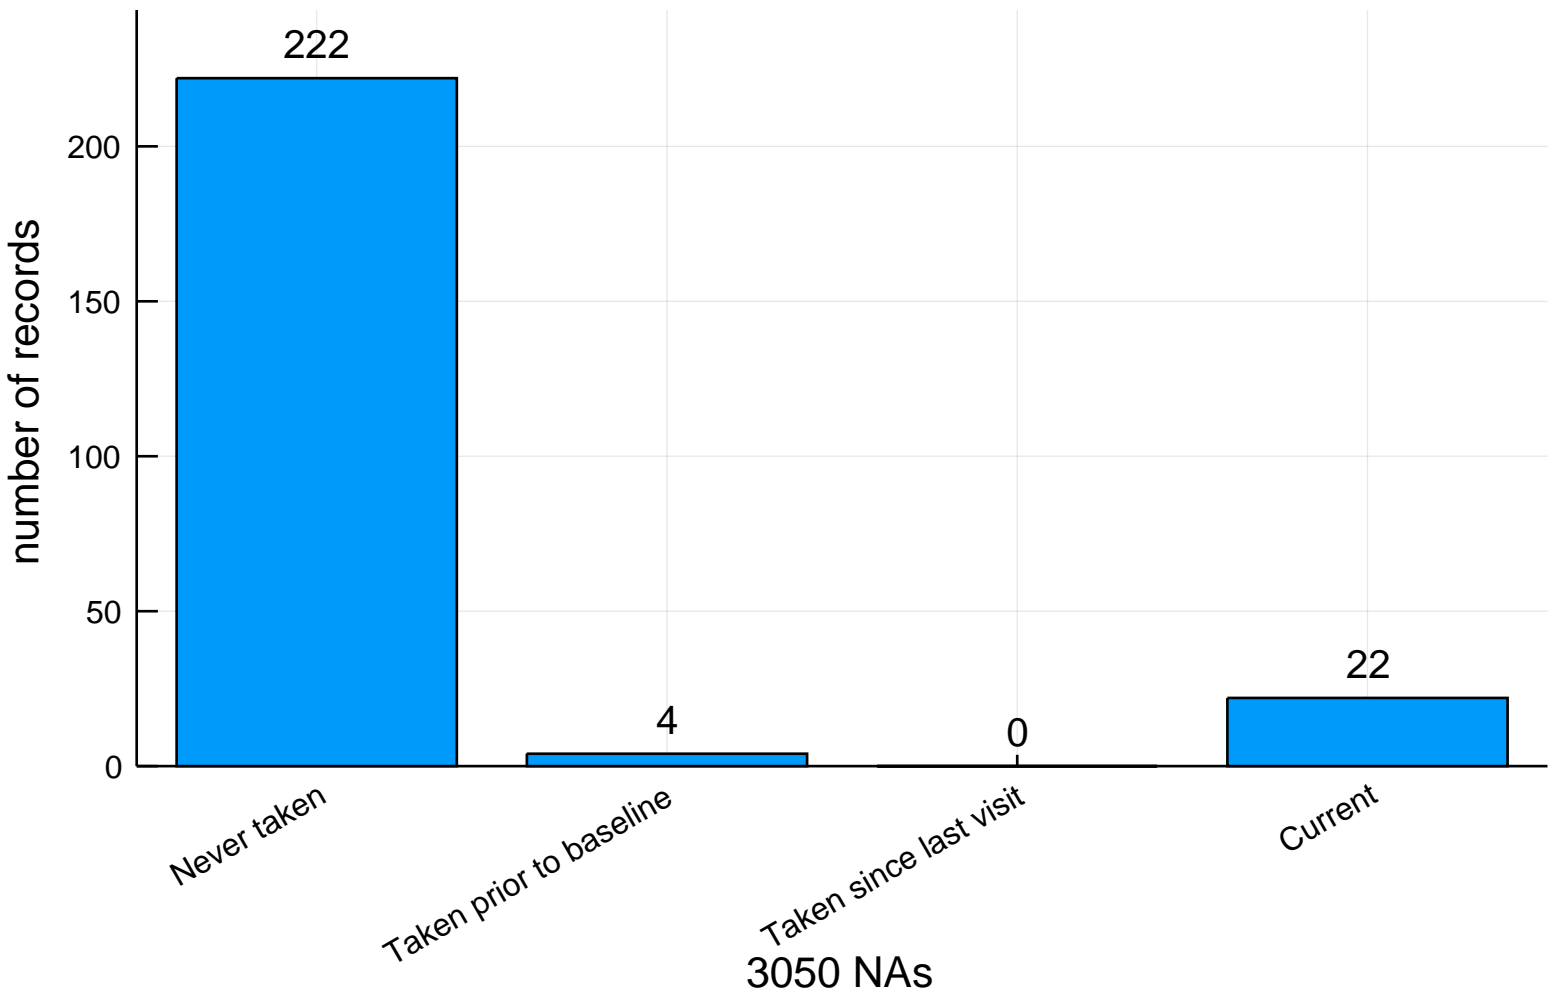

# Methotrexate (per site\_sub\_coll)

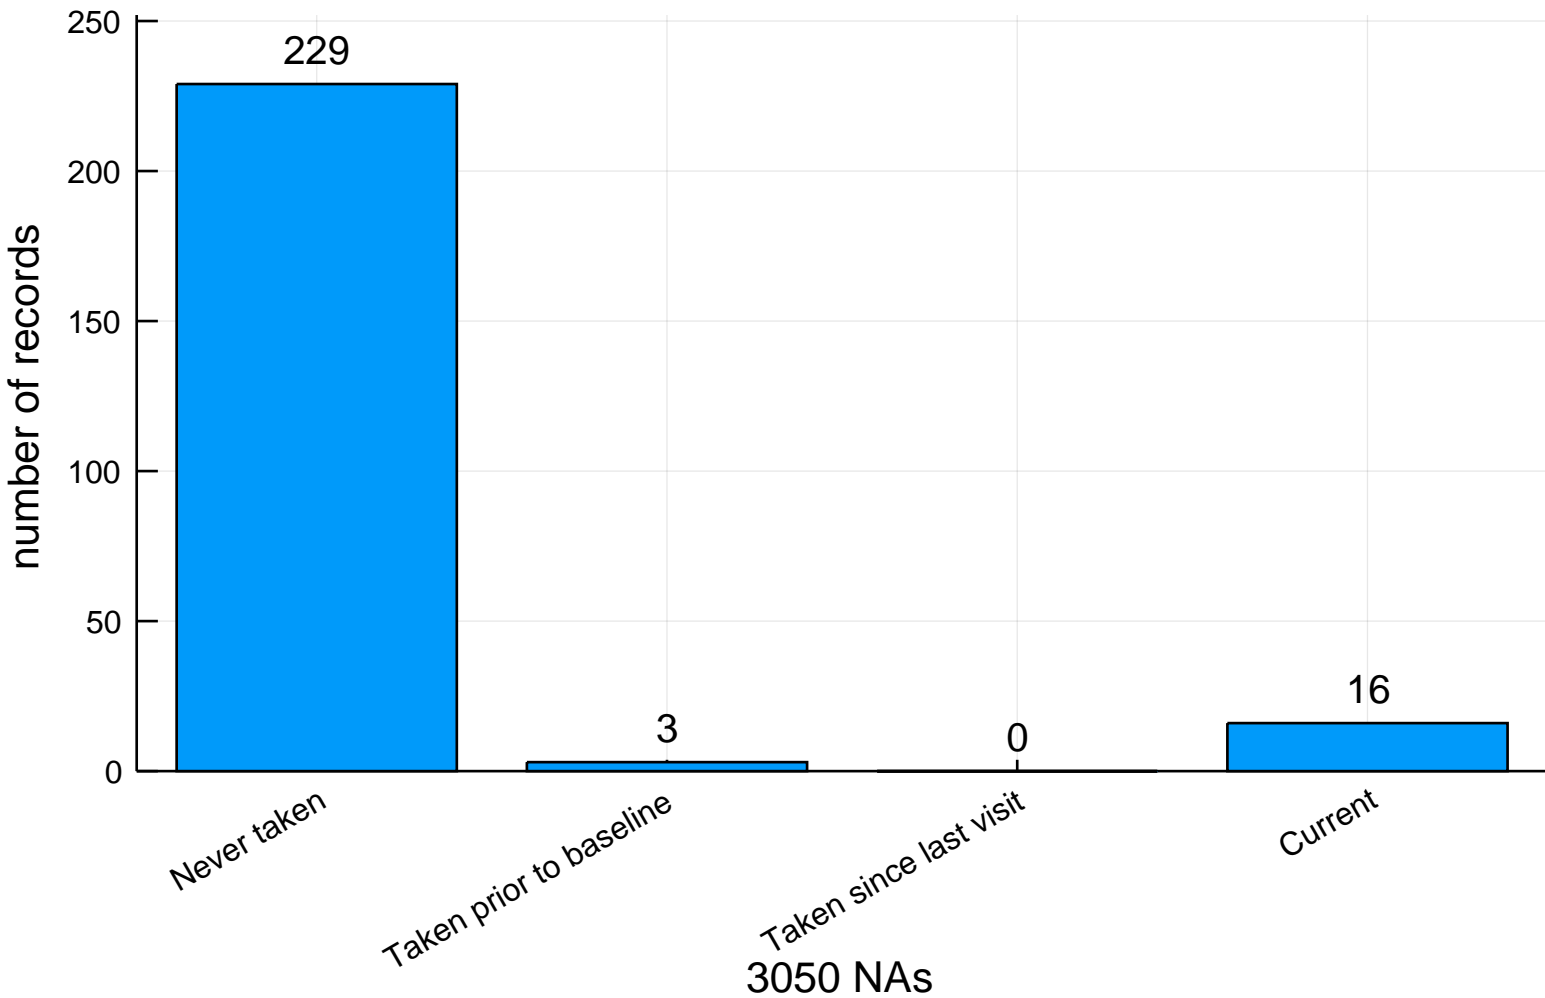

# Modified Baron s Score (per site\_sub\_coll)

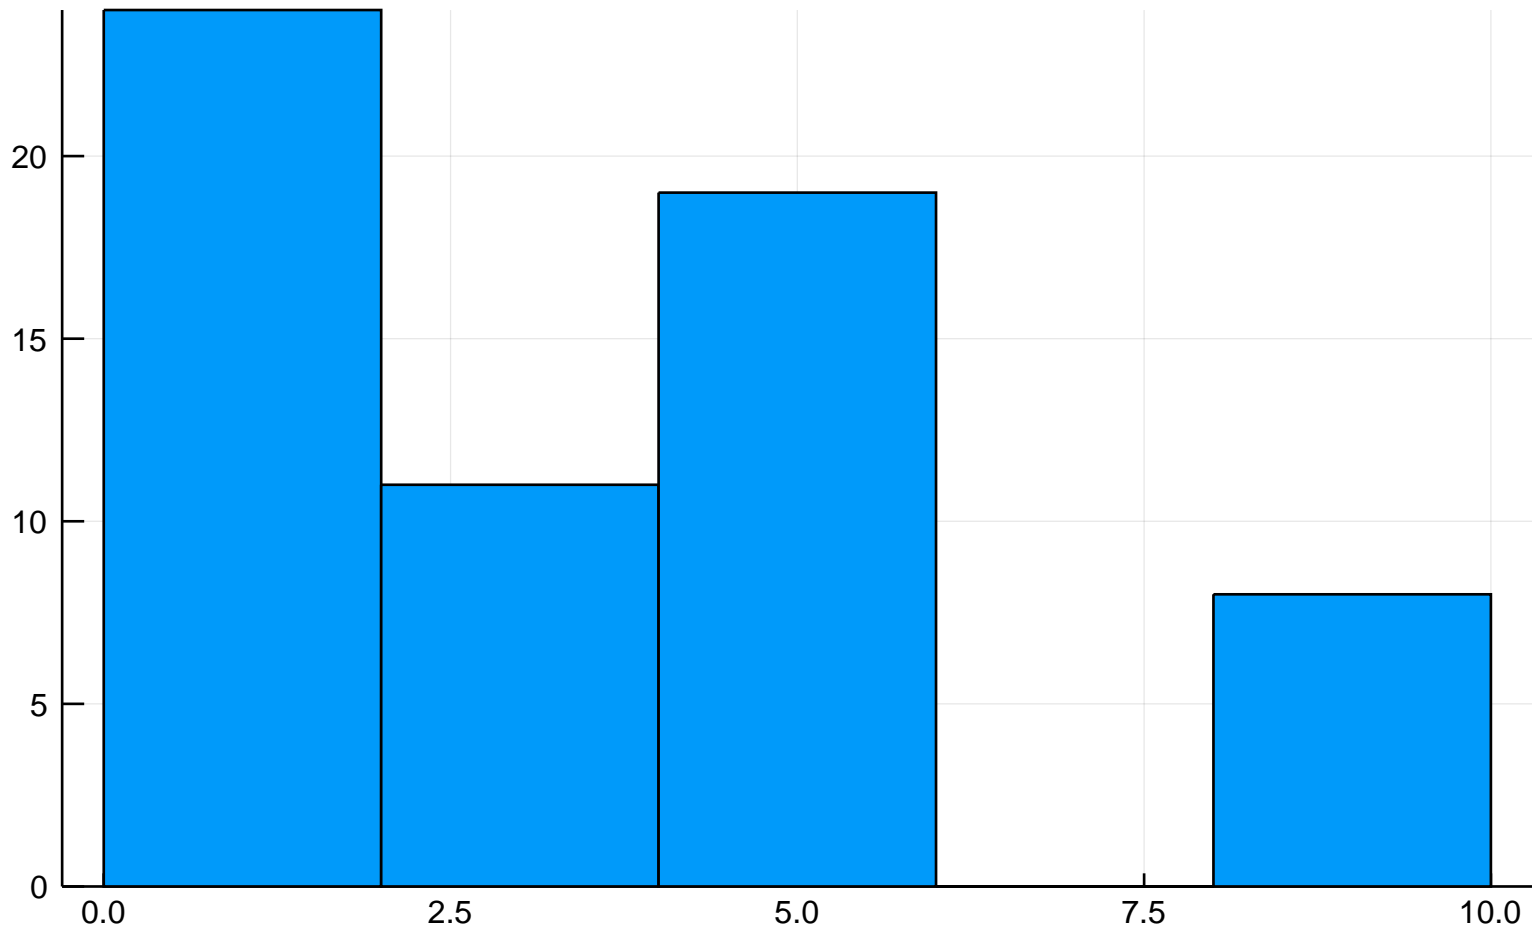

Mean: 2.89, stdev: 2.72



# Mother (per Participant\_ID)

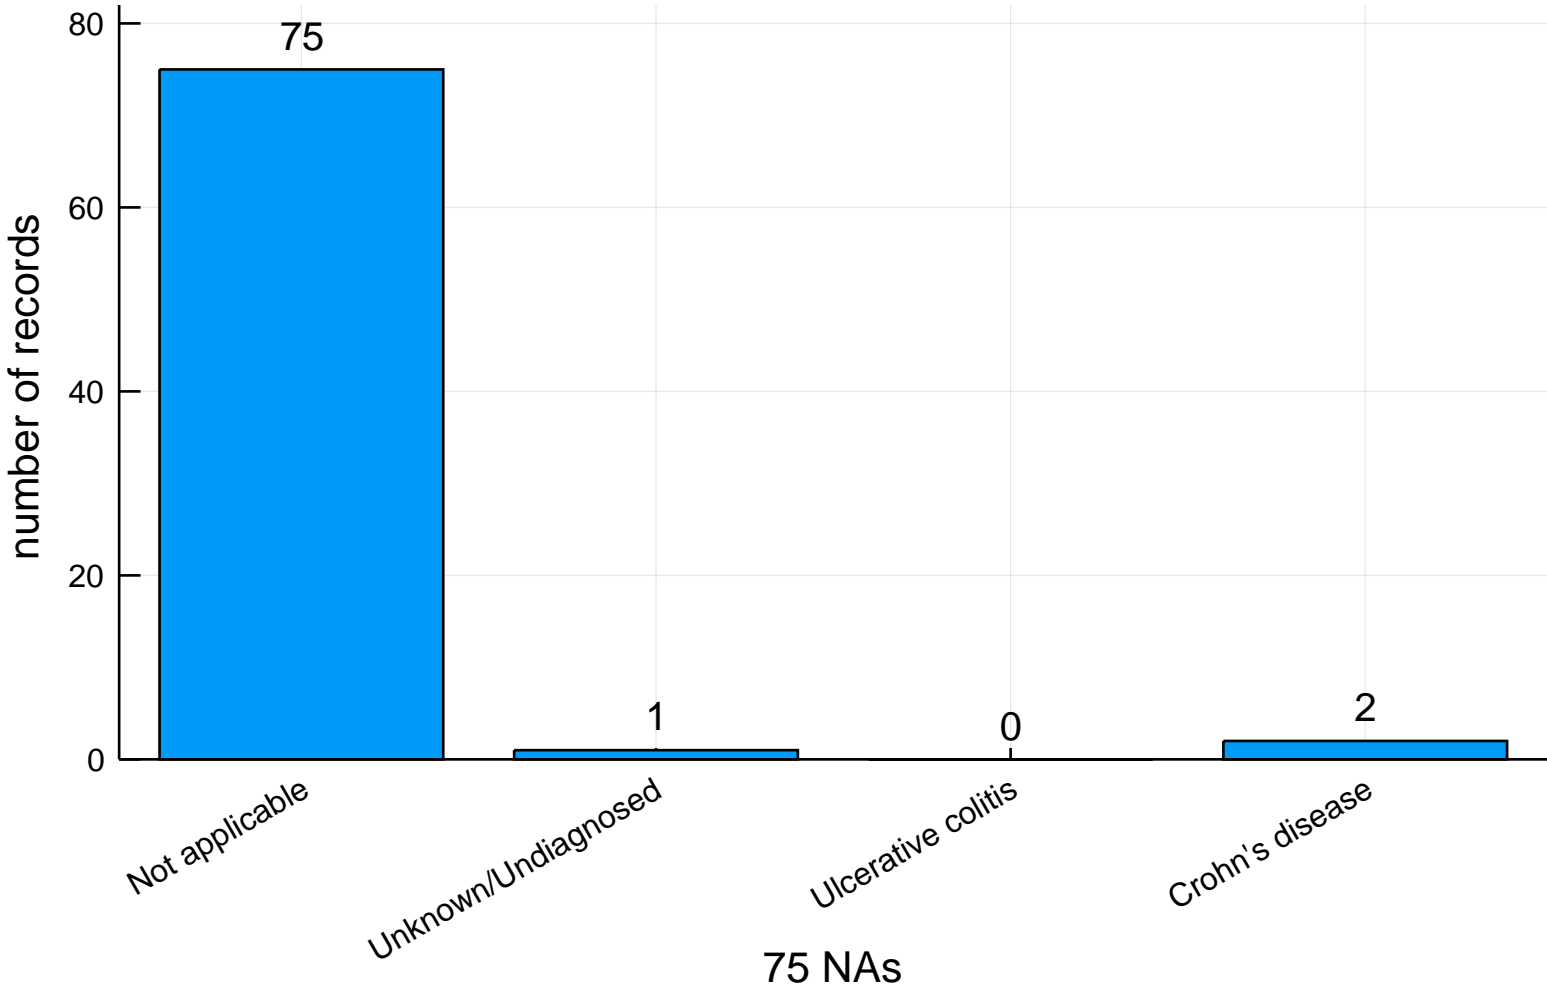

# My sleep was restless (per Participant\_ID)

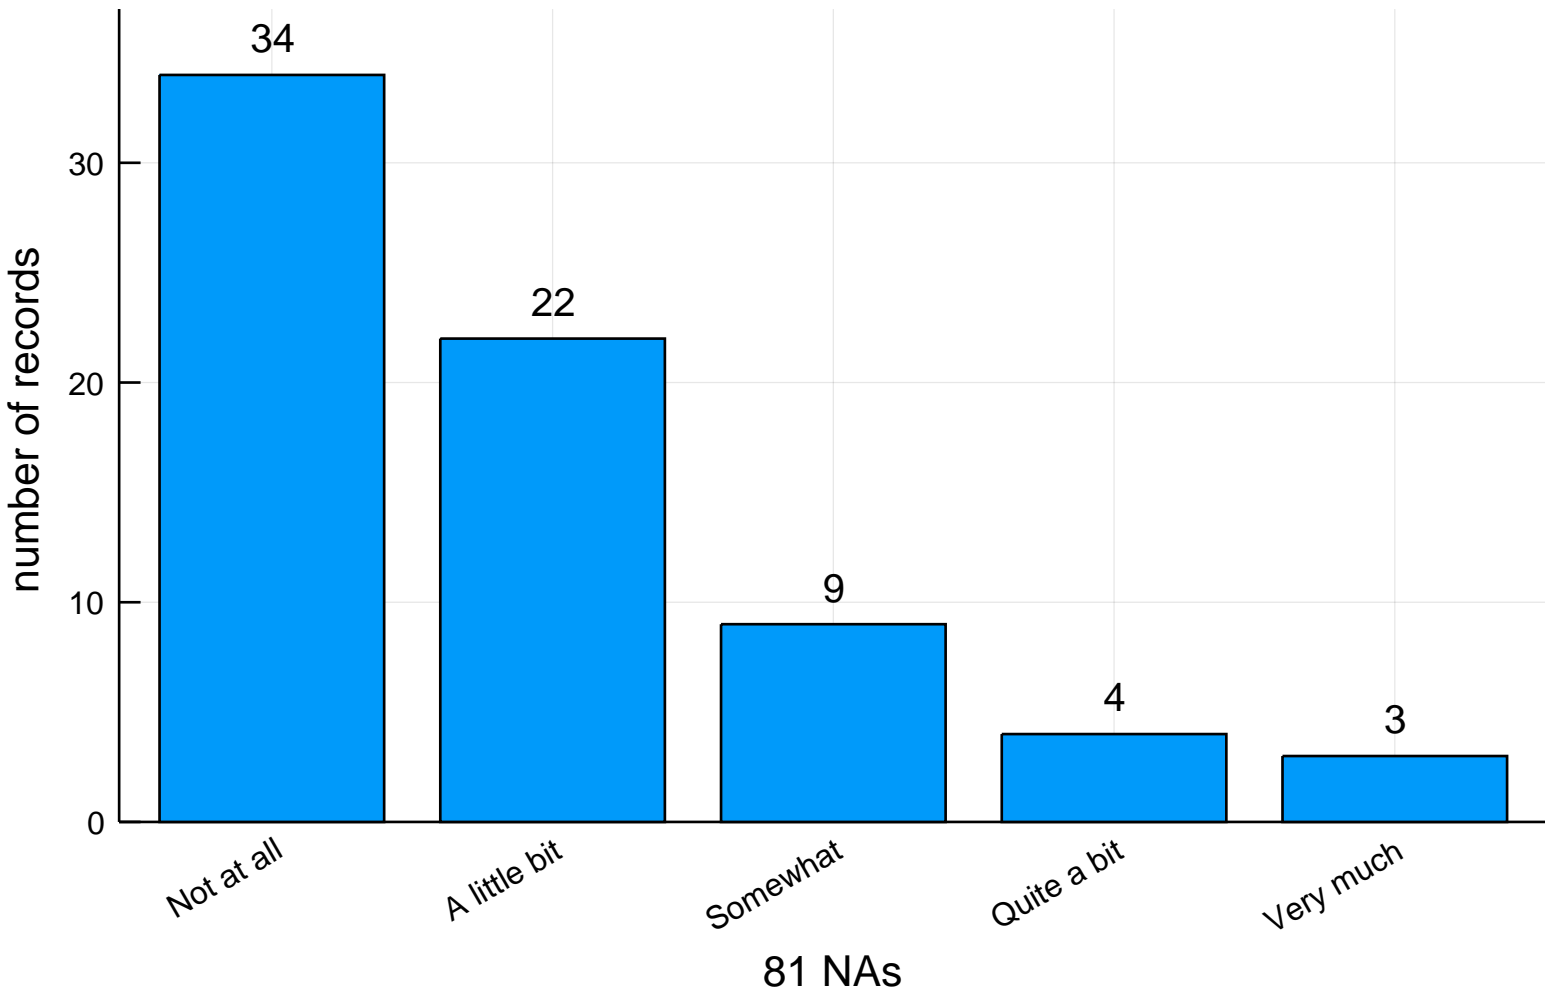

# My worries overwhelmed me (per Participant\_ID)

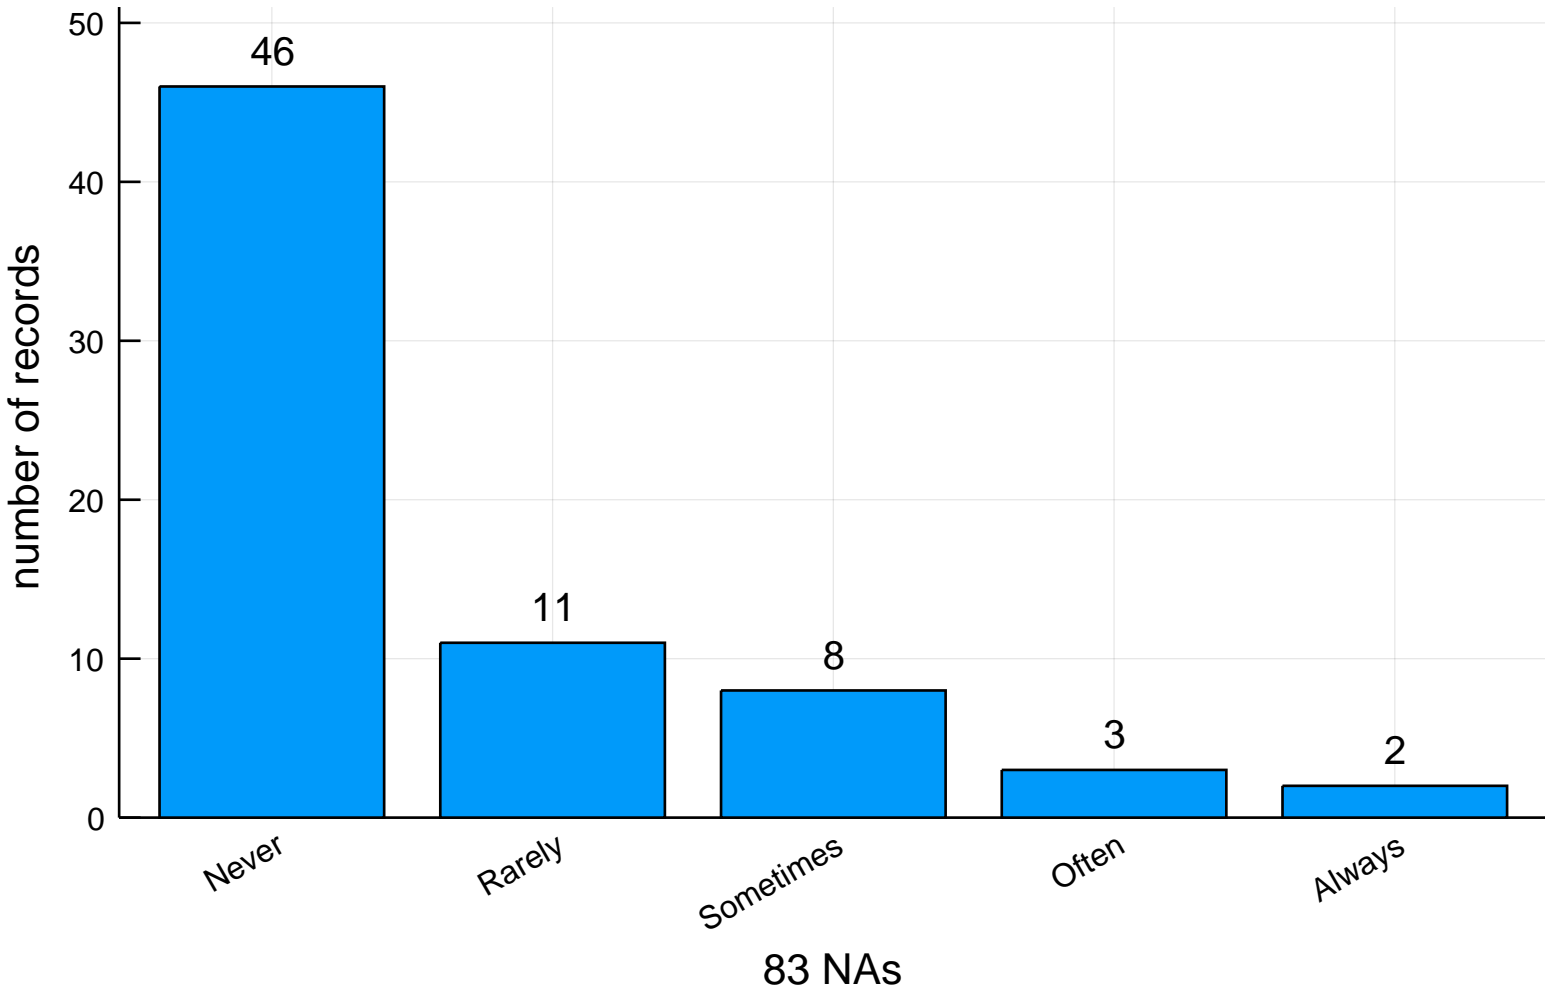

# New fistula (per site\_sub\_coll)

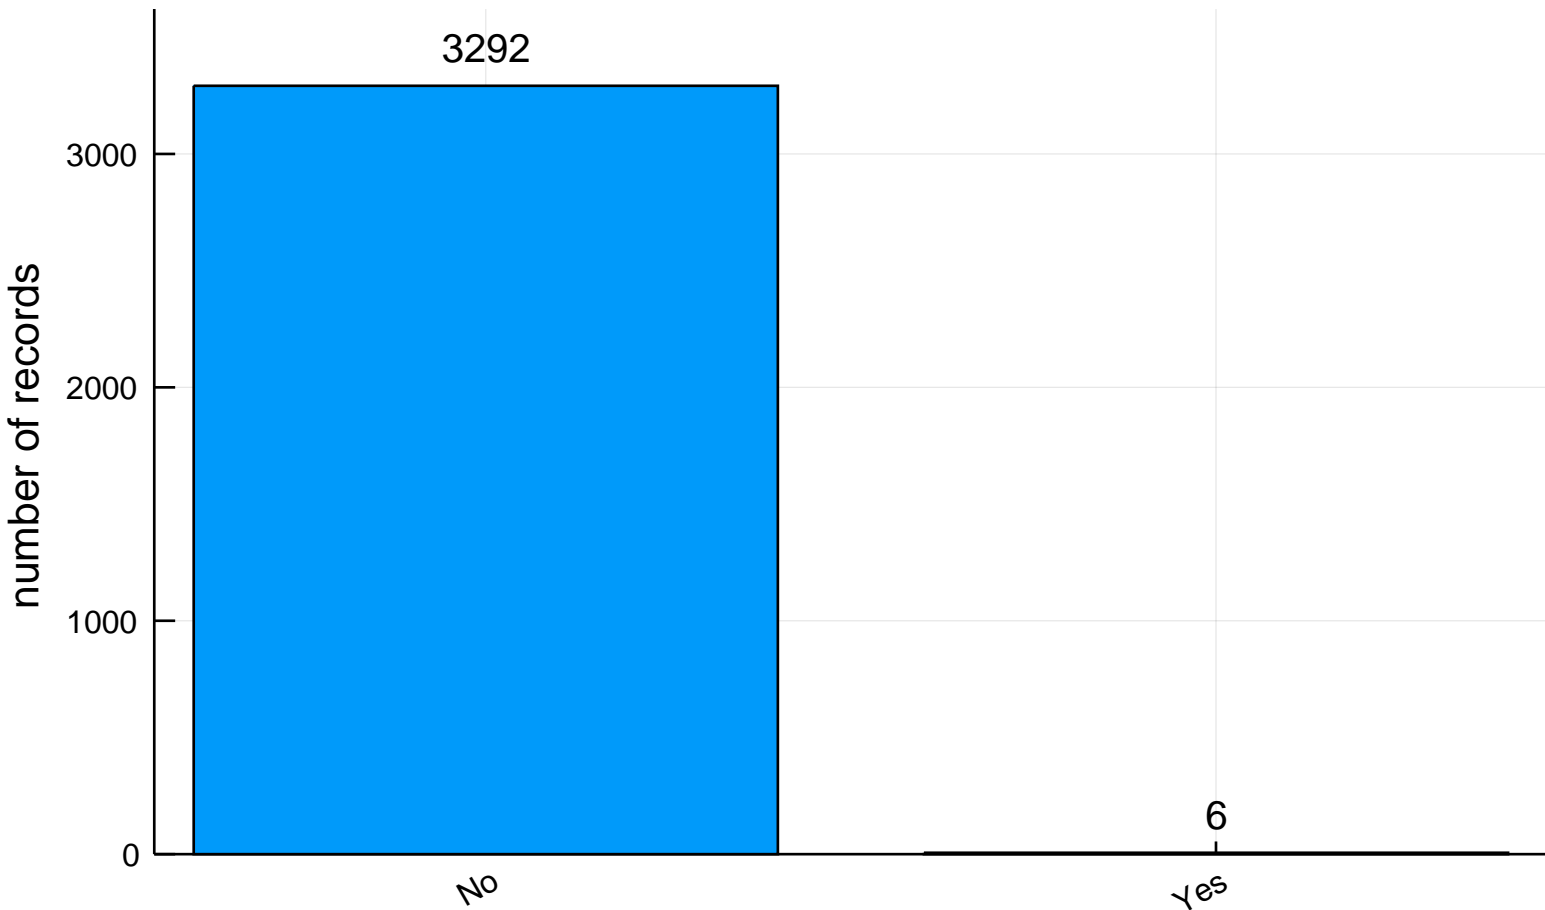

0 NAs

# Non alcoholic mouthwash (per Participant\_ID)

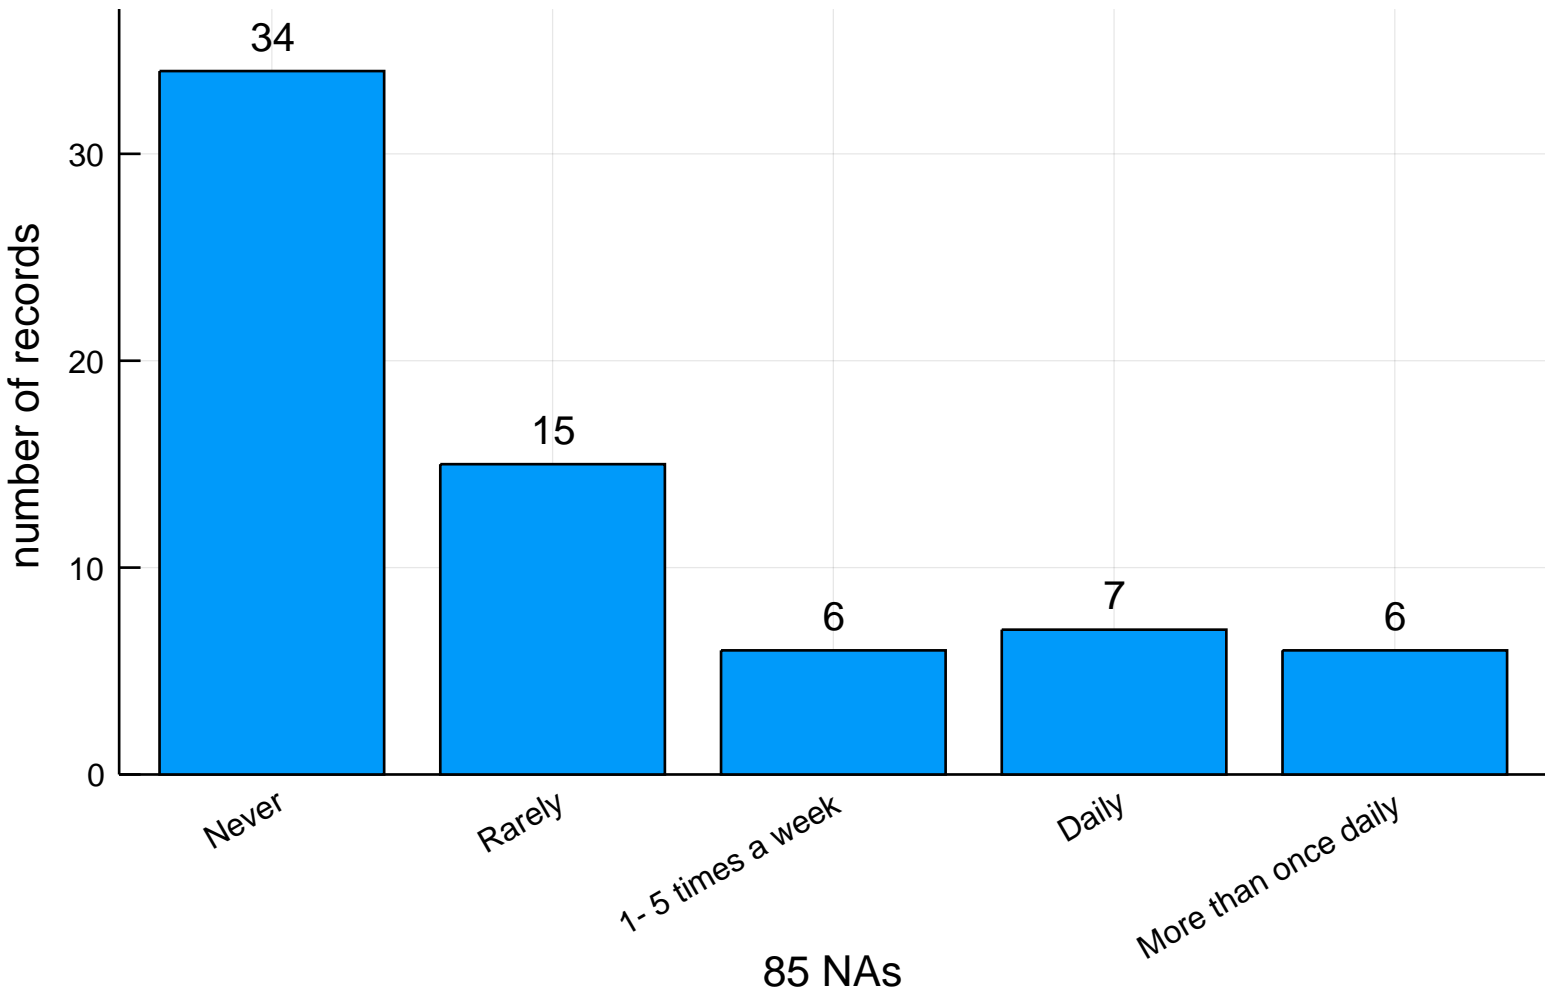

# Non inflamed flora (per site\_sub\_coll)

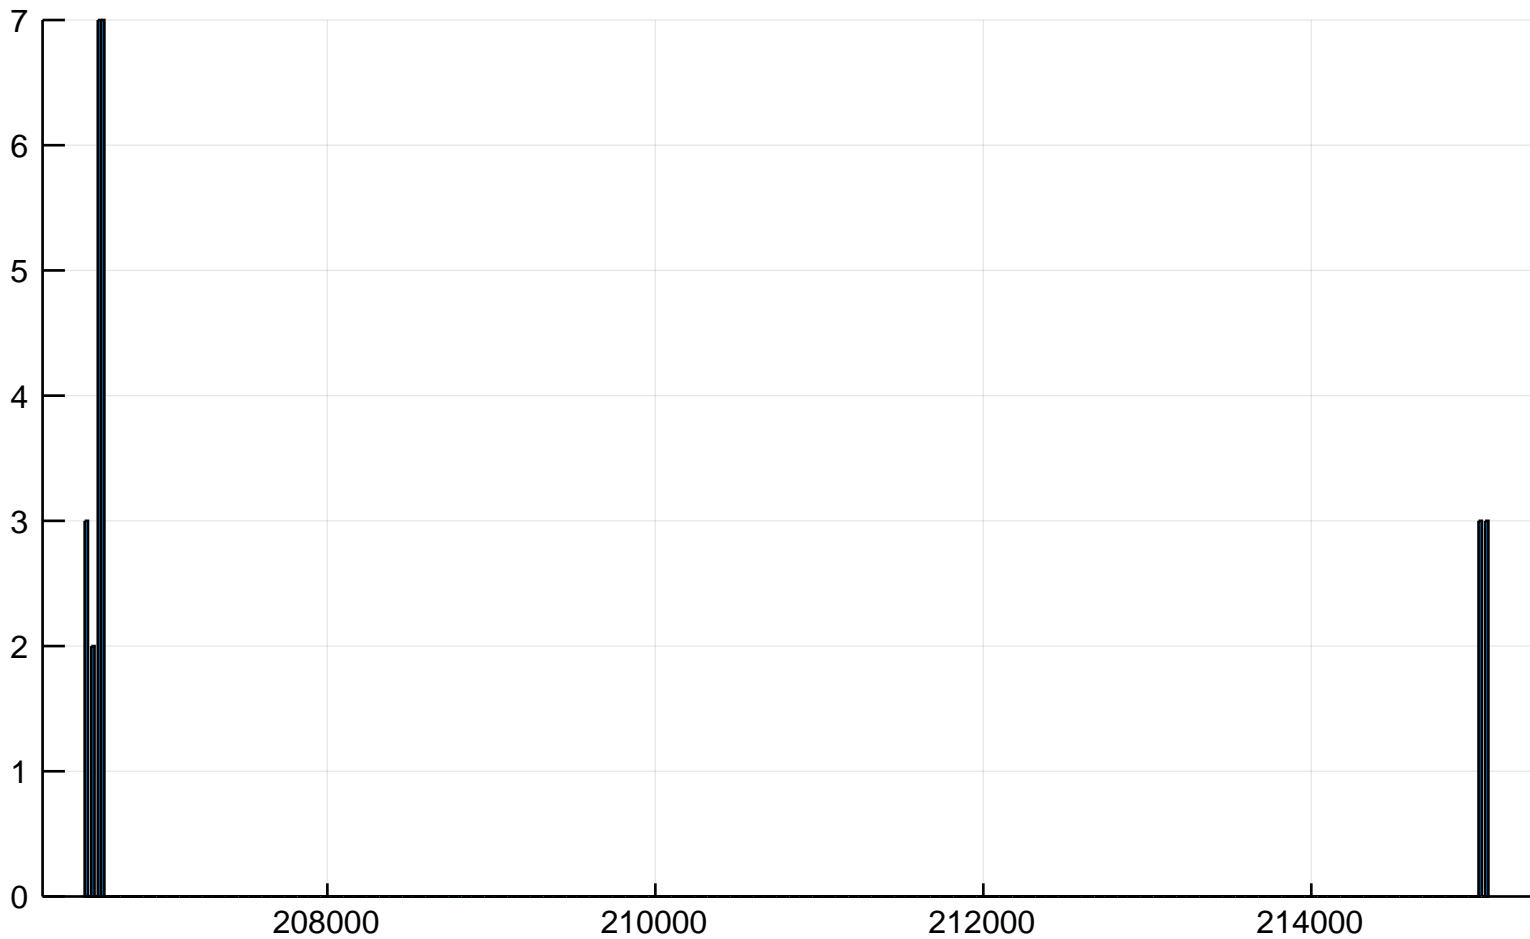

Mean: 208625.64, stdev: 3680.74

# Number of DNA RNA tubes collected (per row)

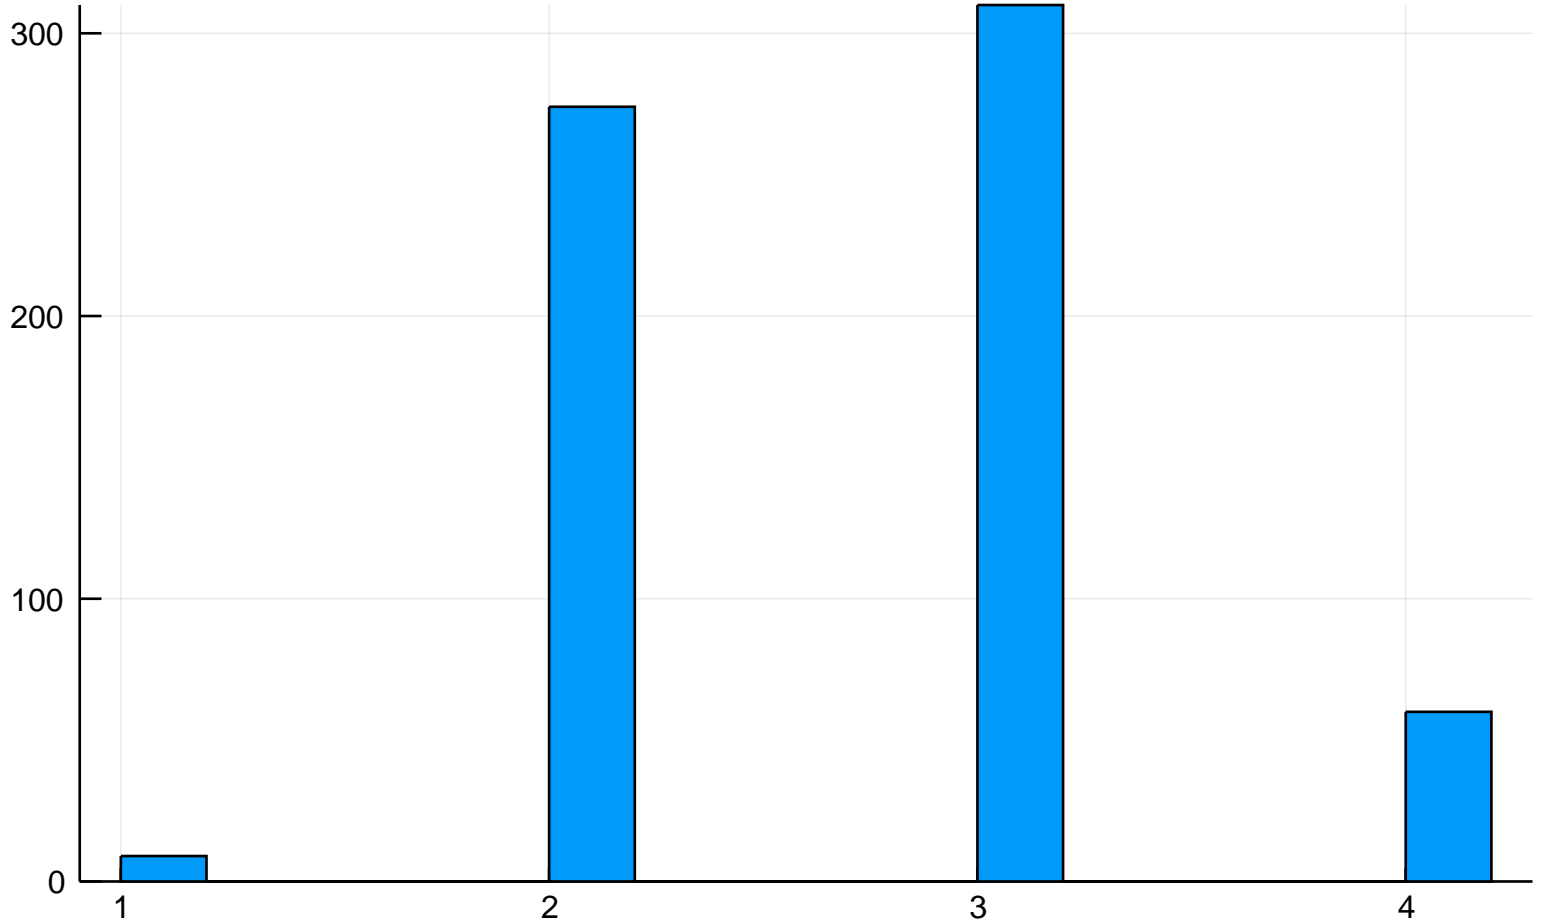

Mean: 2.64, stdev: 0.66

# Number of flora tubes collected (per site\_sub\_coll)

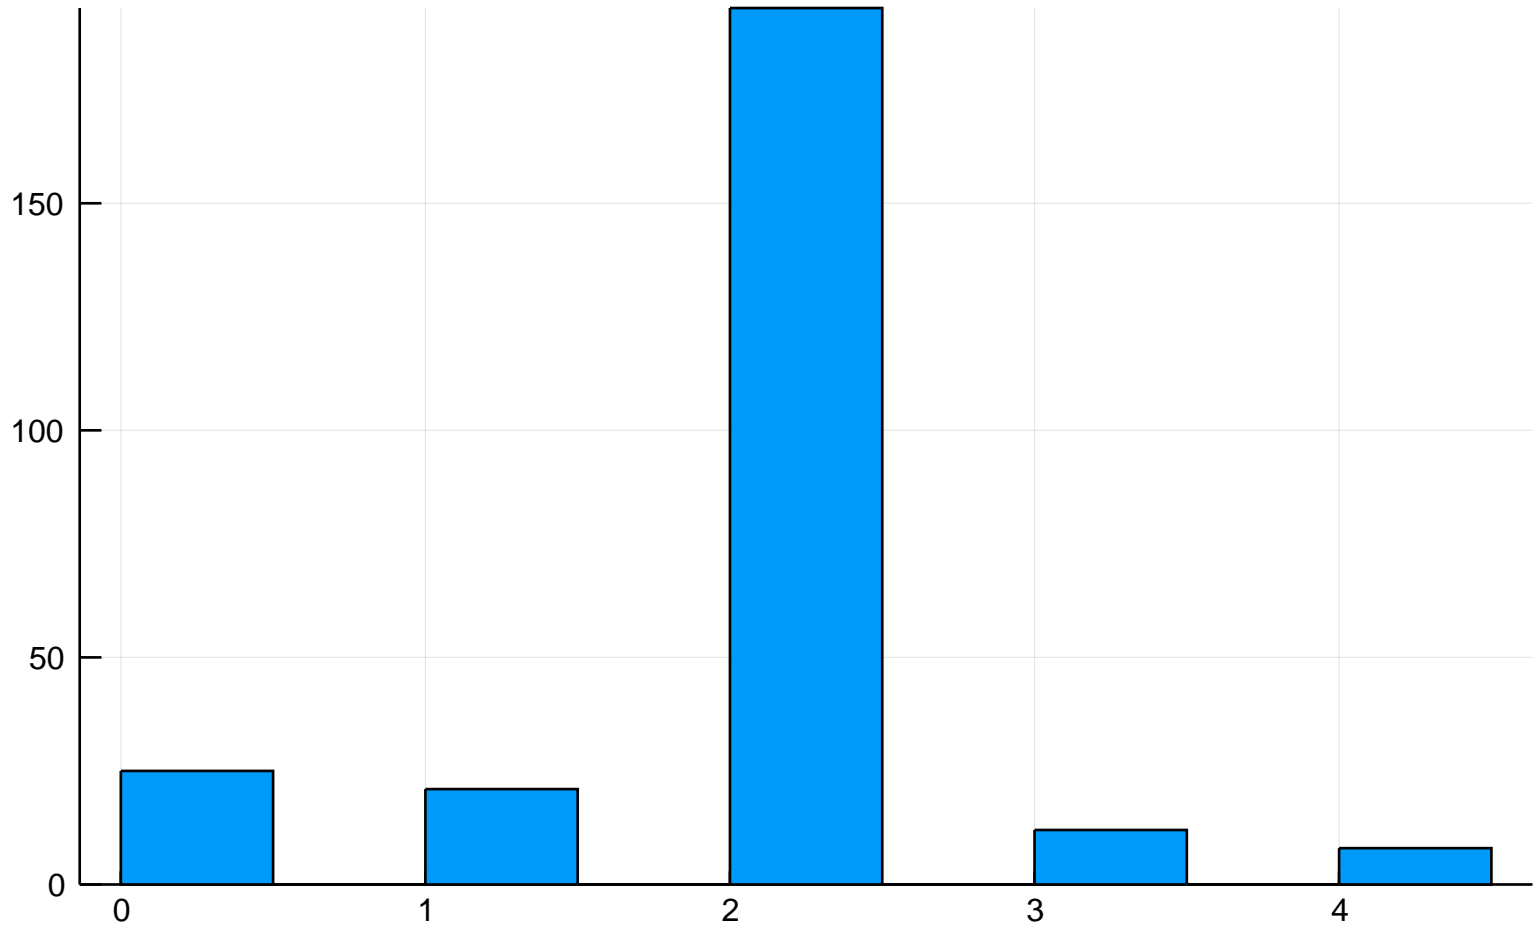

Mean: 1.83, stdev: 0.78



Number of liquid or very soft stools in (per site\_sub\_coll)

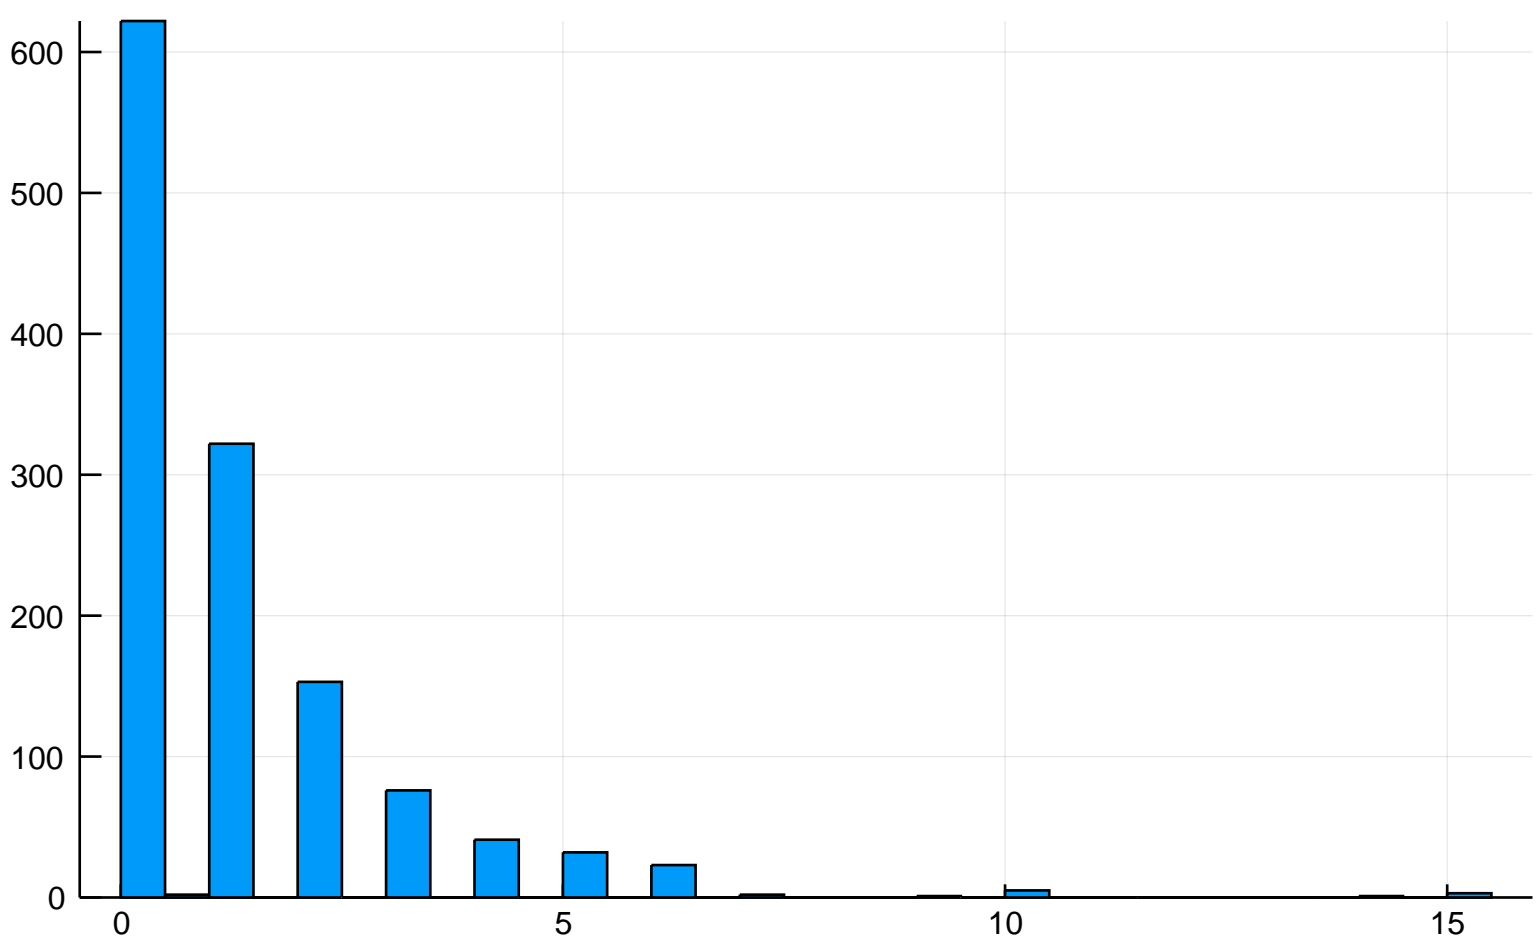

Mean: 1.13, stdev: 1.72

# Number of tubes collected for epithelial (per site\_sub\_coll)

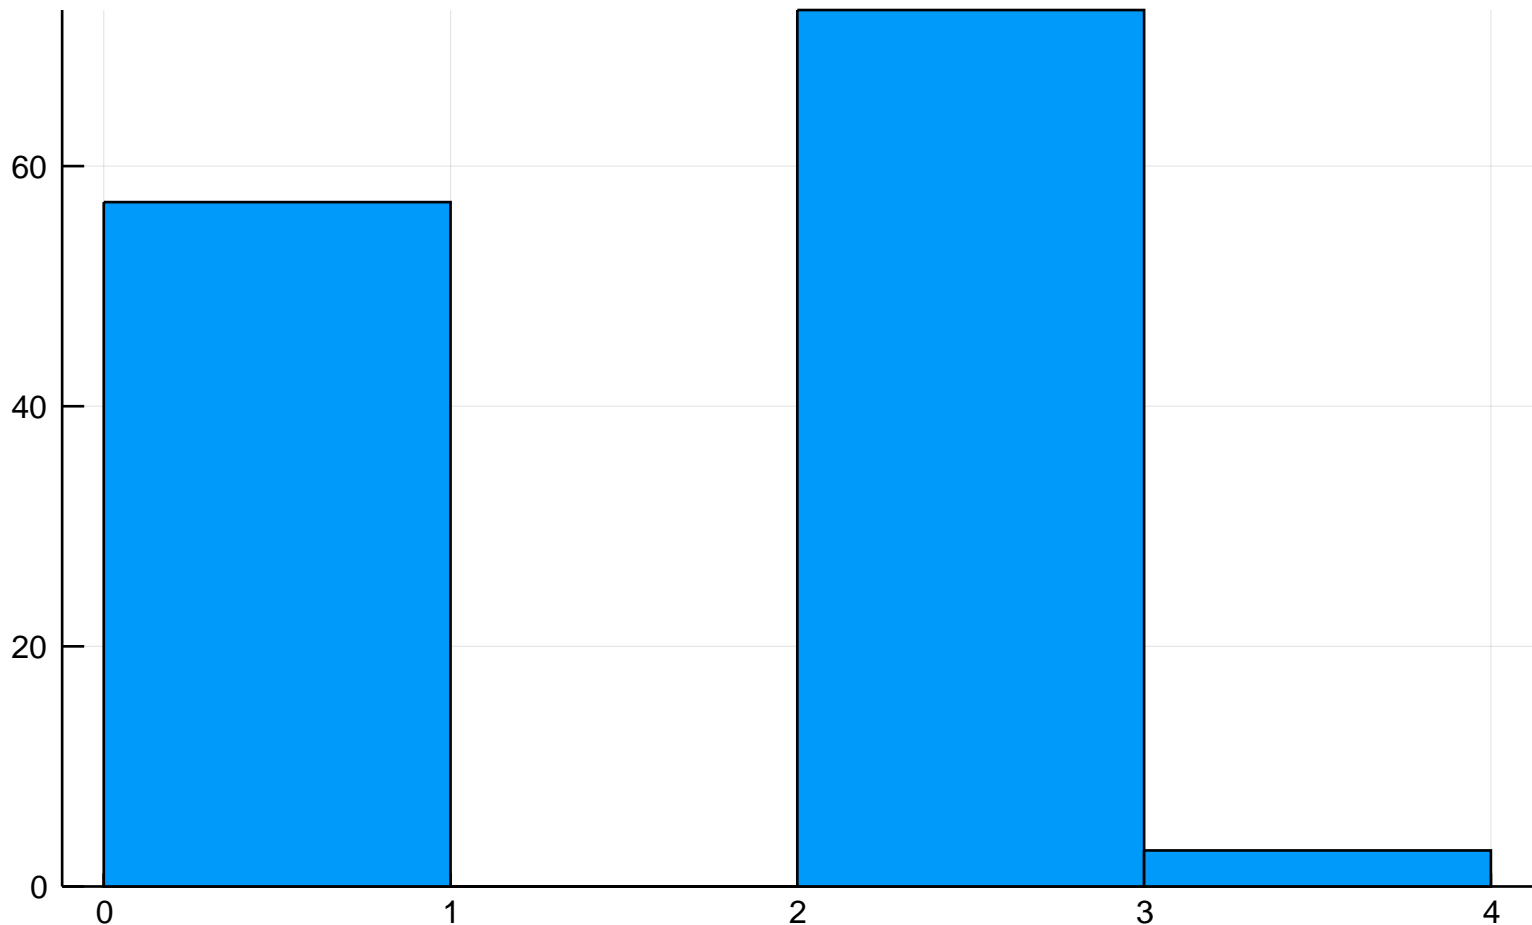

Mean: 1.17, stdev: 1.02

# Number years smoked (per Participant\_ID)

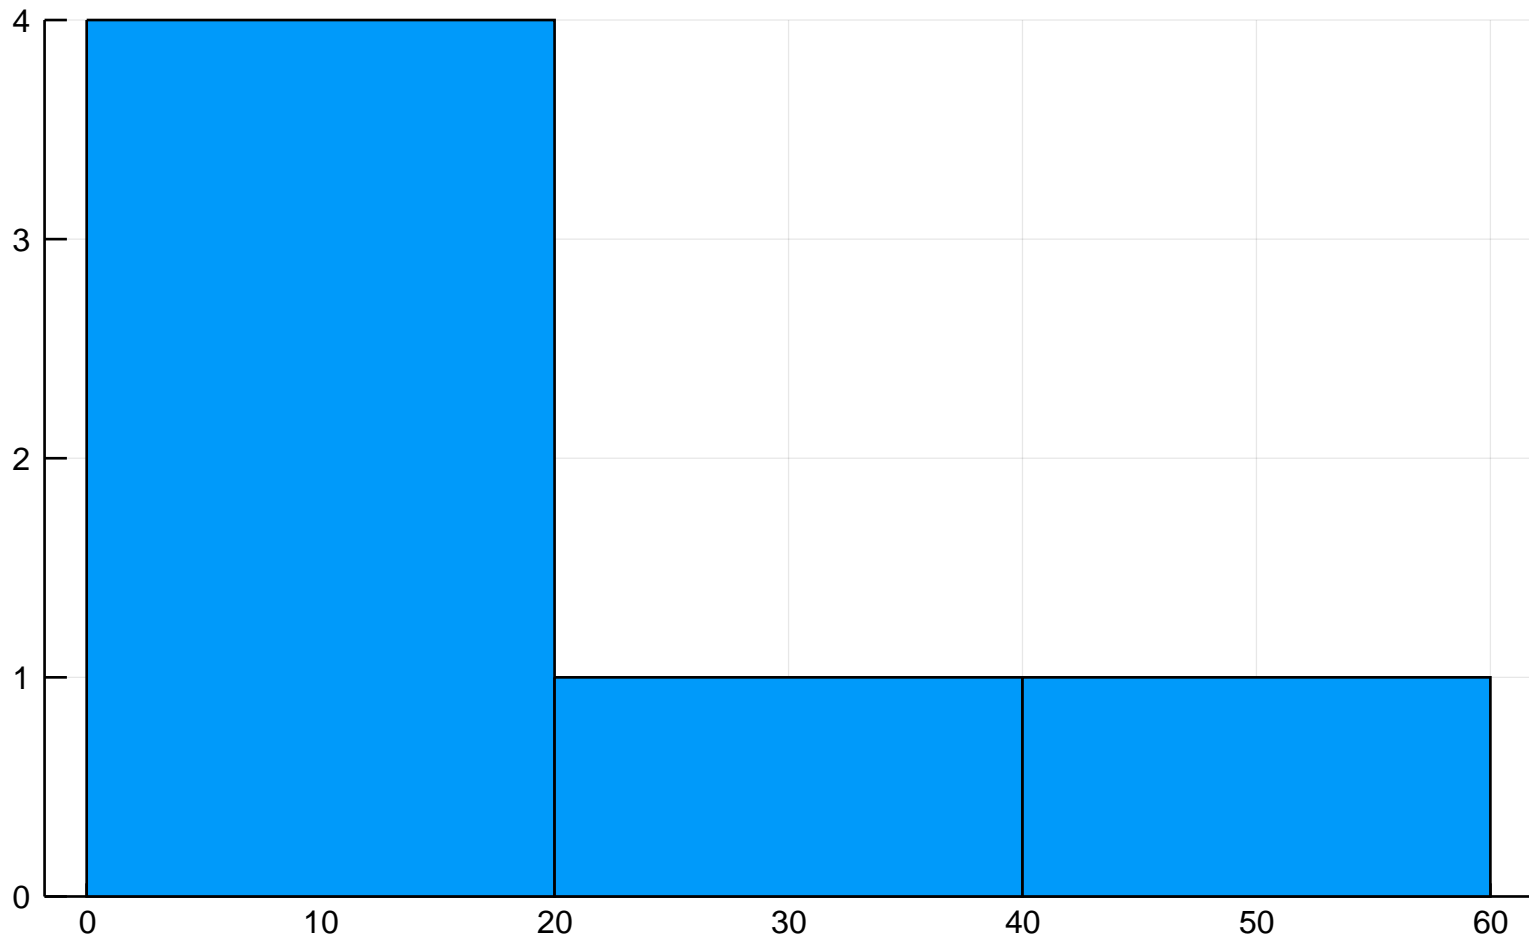

Mean: 17.17, stdev: 17.27

# Occupation (per Participant\_ID)

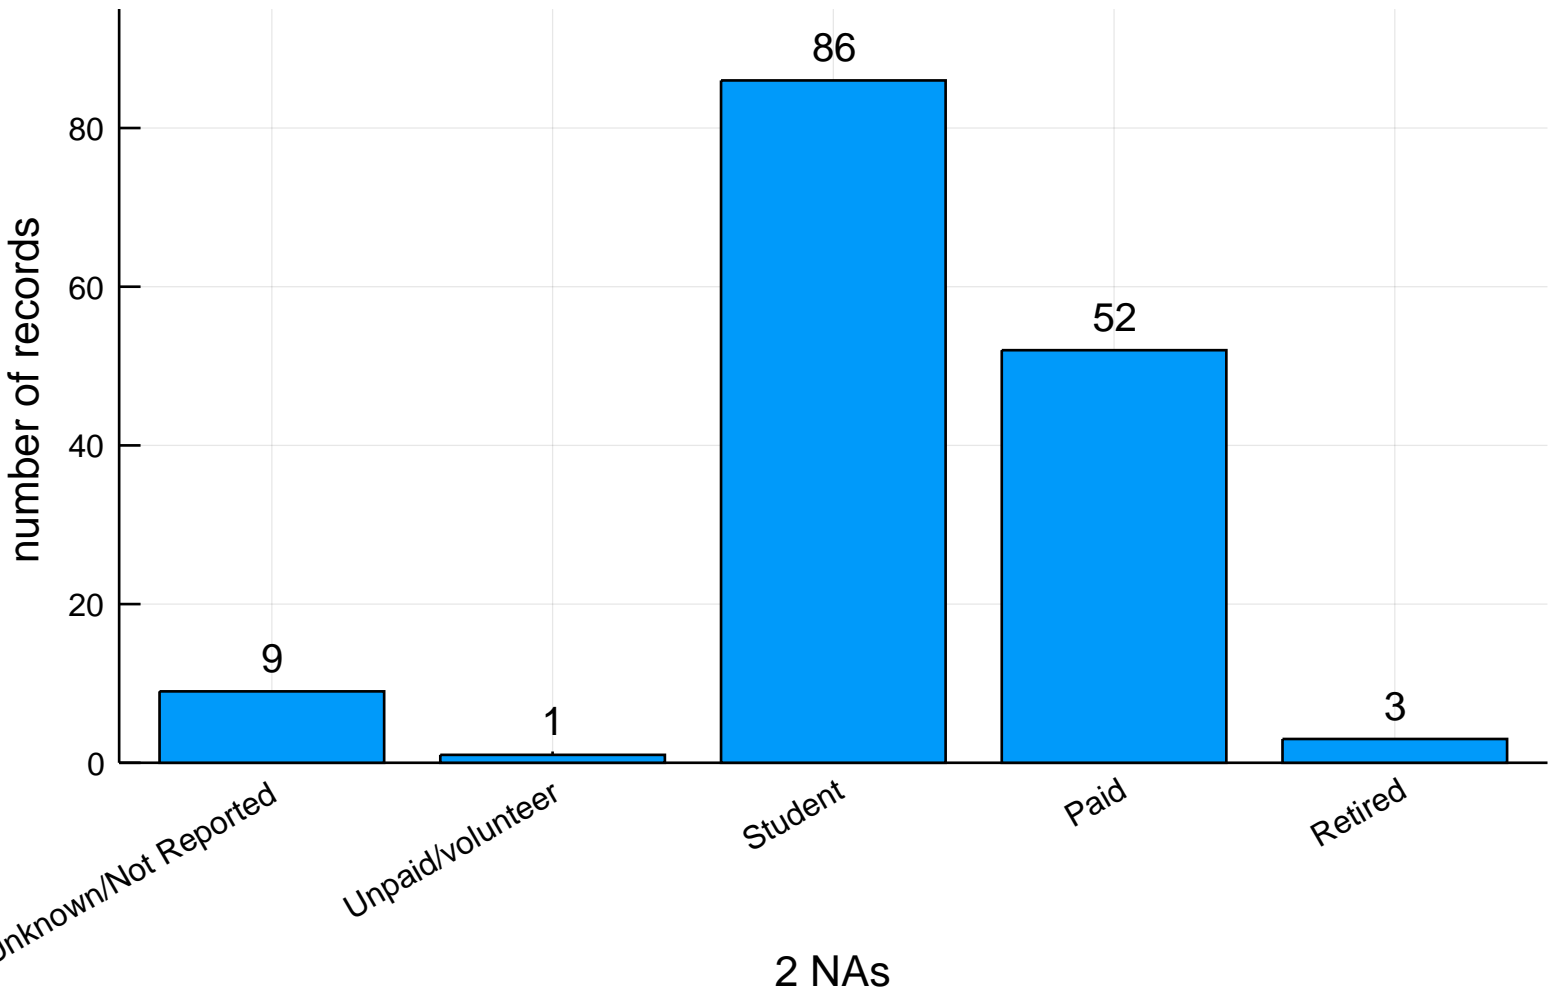

# Other Antibiotic (per site\_sub\_coll)

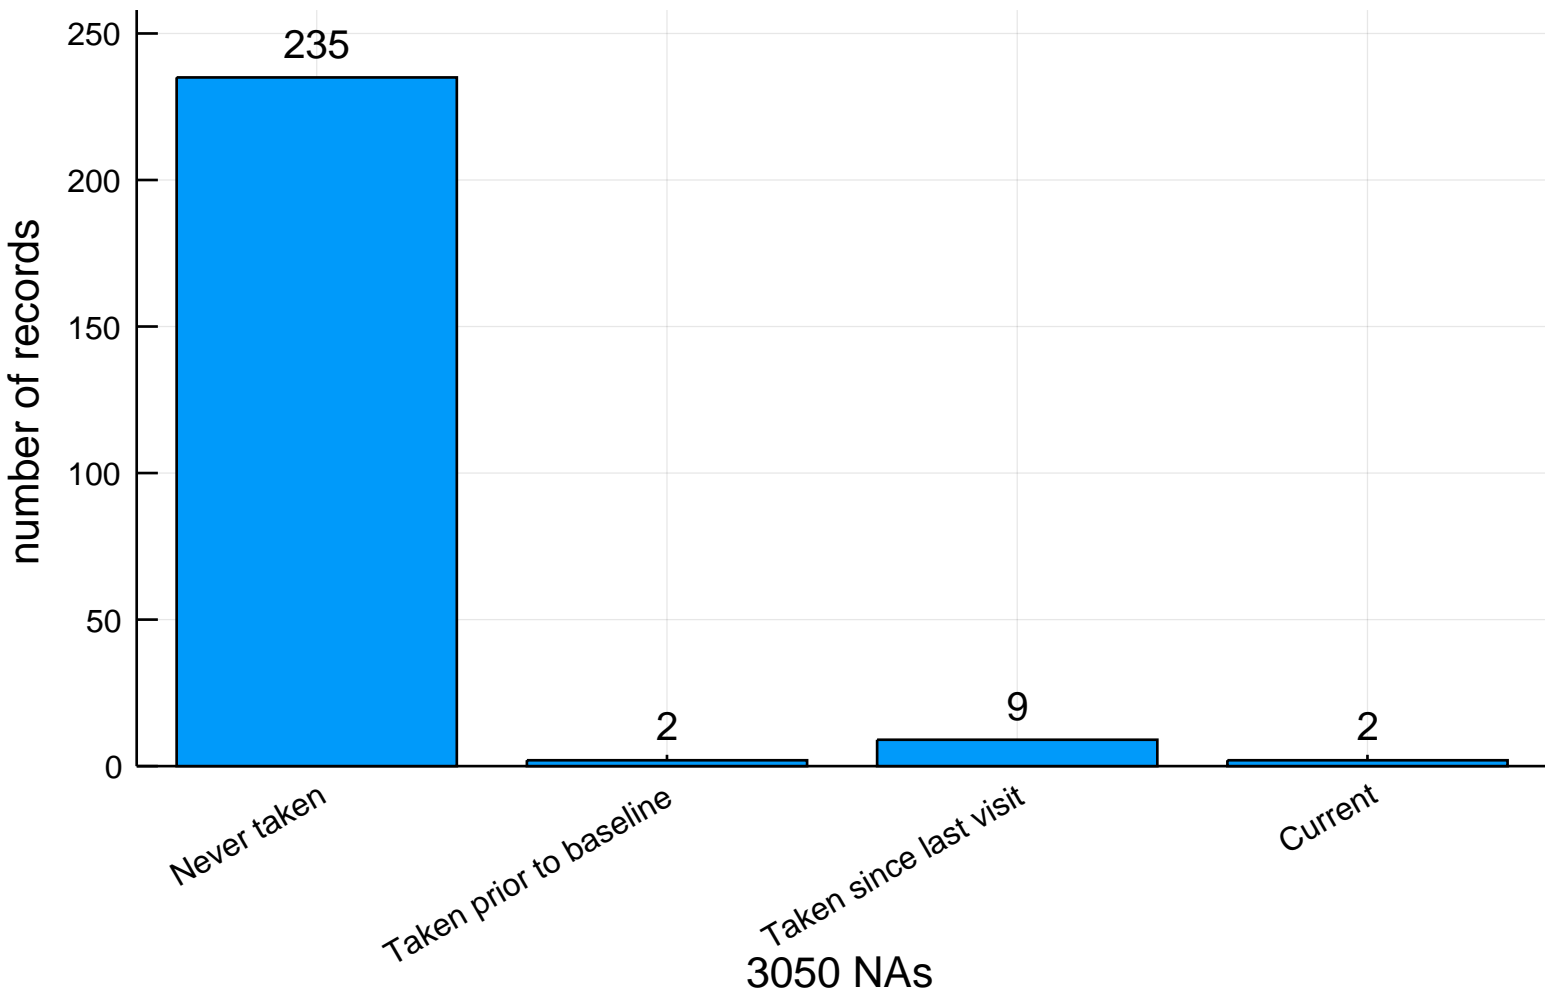

# Other immune mediated diseases (per site\_sub\_coll)

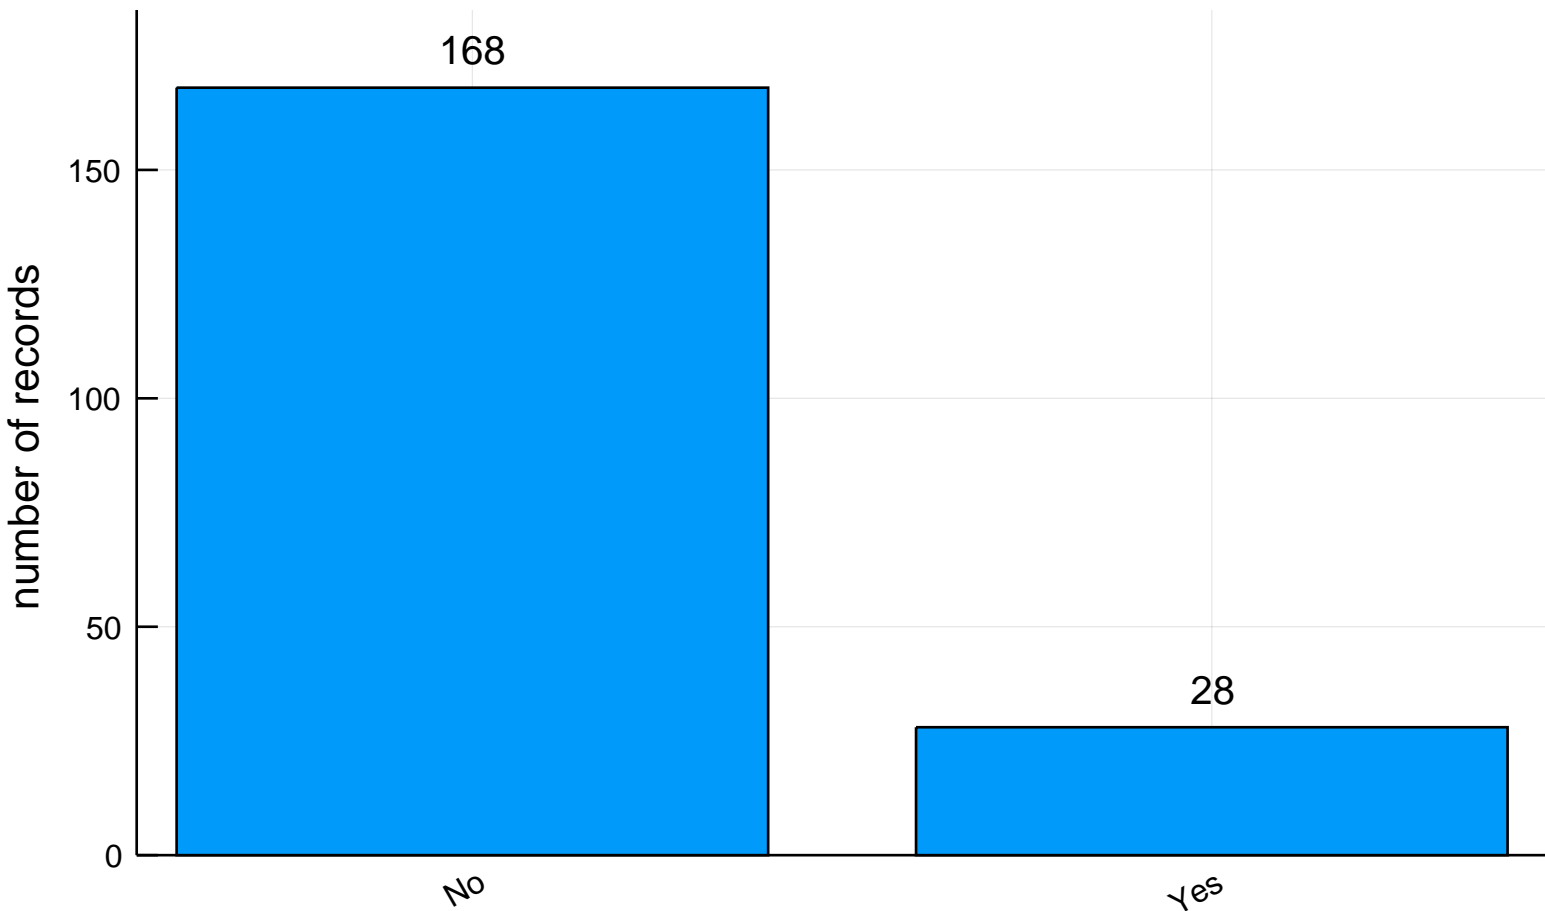

3102 NAs

# Other inflamed flora (per Participant\_ID)

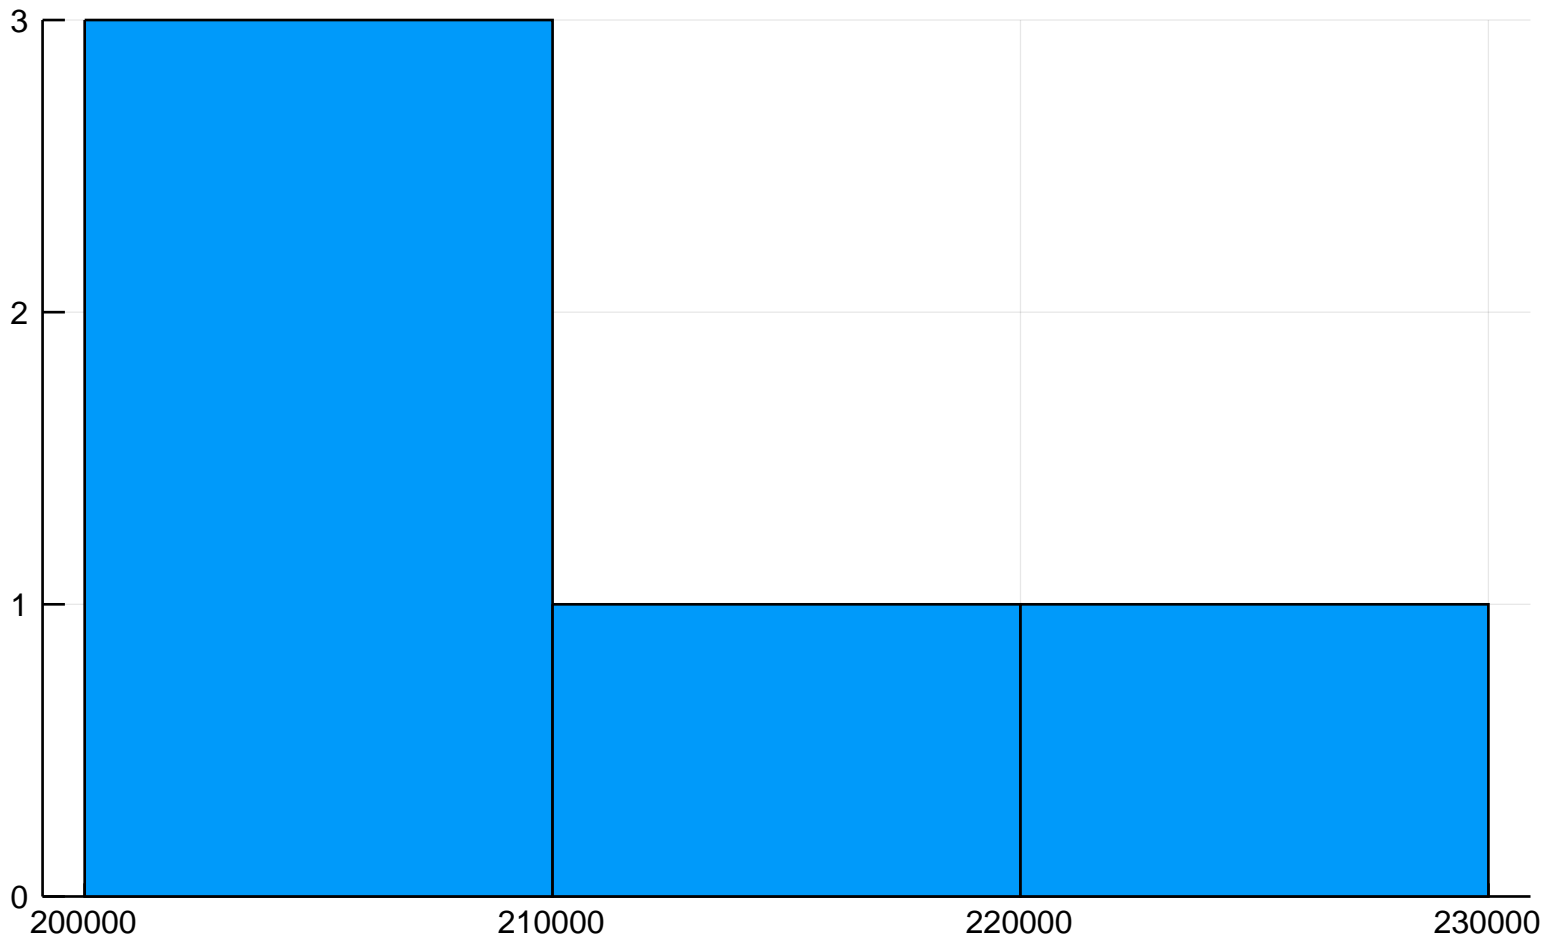

Mean: 212333.6, stdev: 7899.72

# Parents (per Participant\_ID)

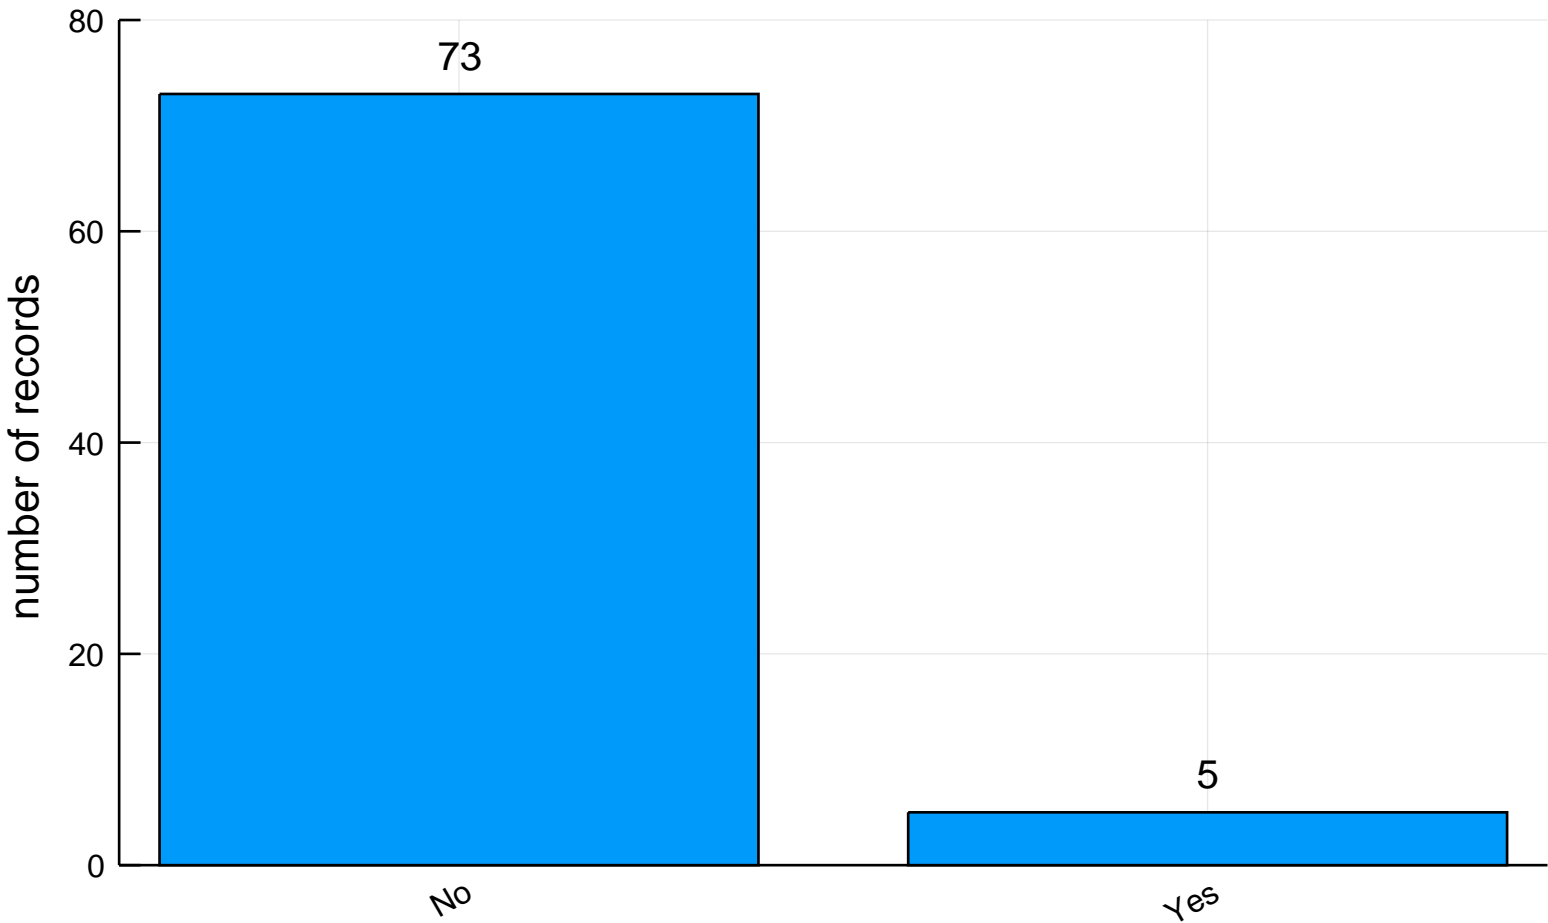

75 NAs



# Partial Endoscopy (per row)

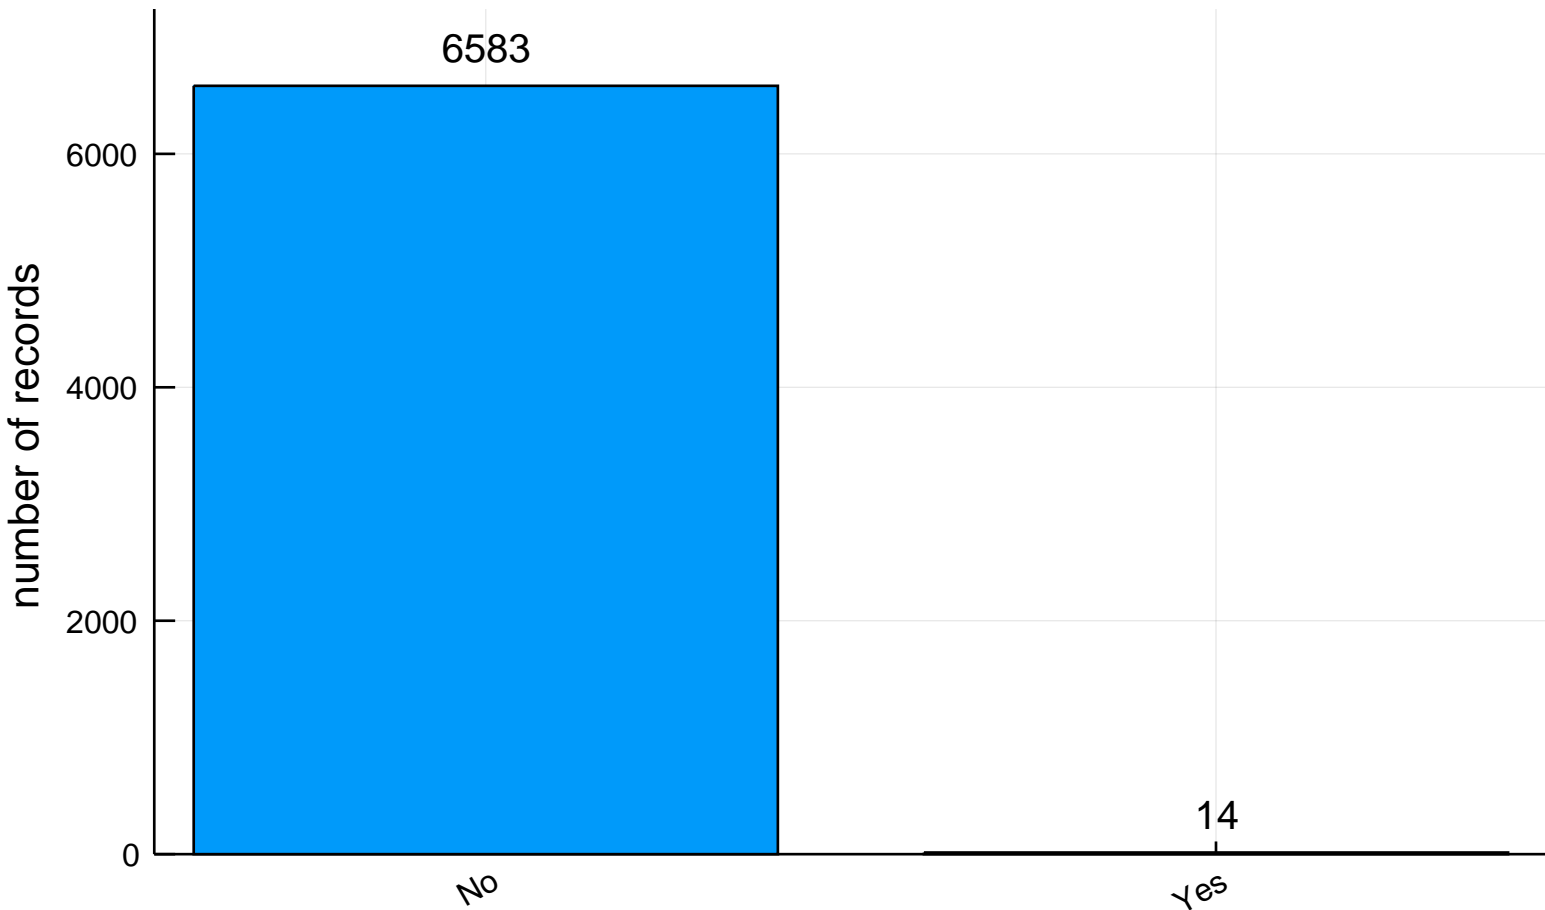

0 NAs

# Partial Endoscopy 1 (per row)

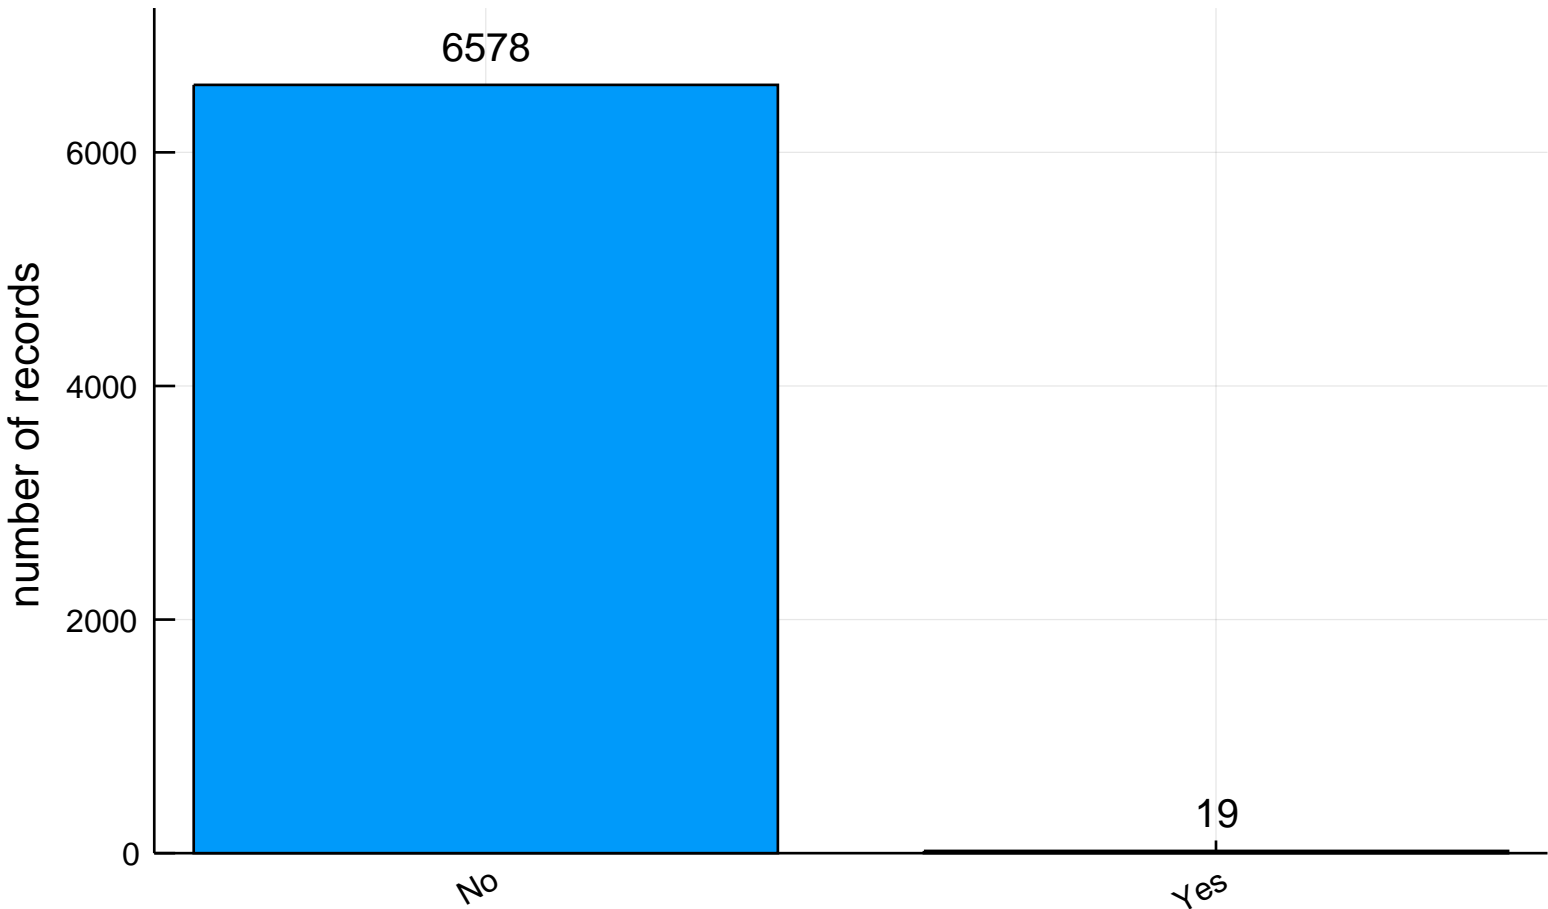

0 NAs

# Pentasa mesalamine (per site\_sub\_coll)

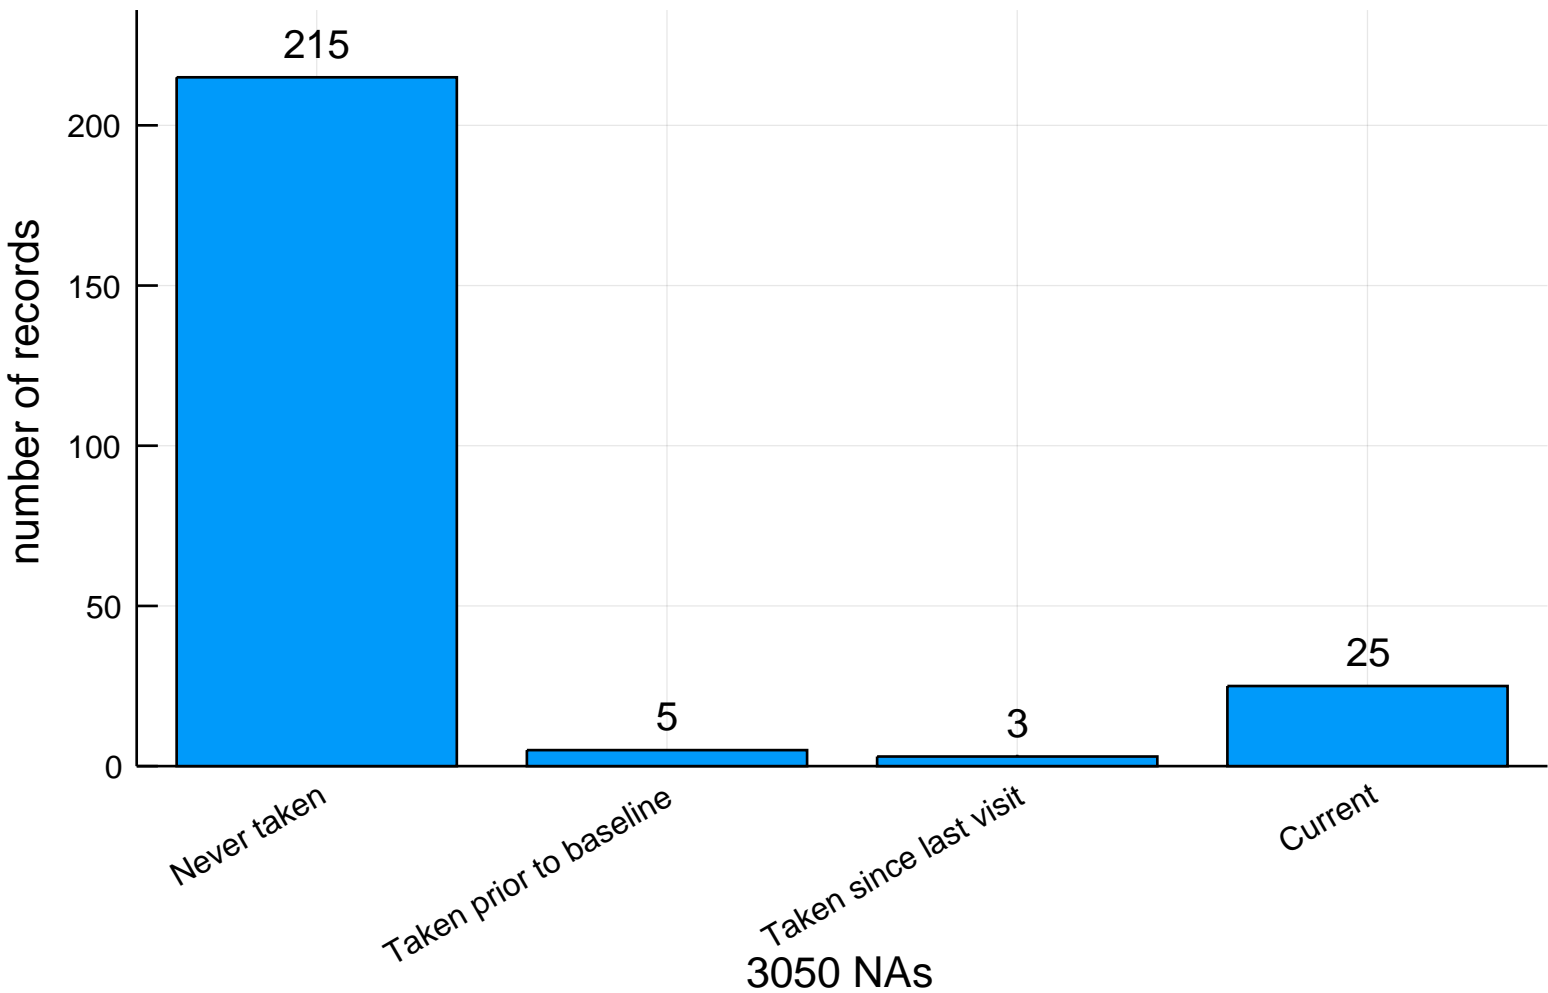

# Prednisone (per site\_sub\_coll)

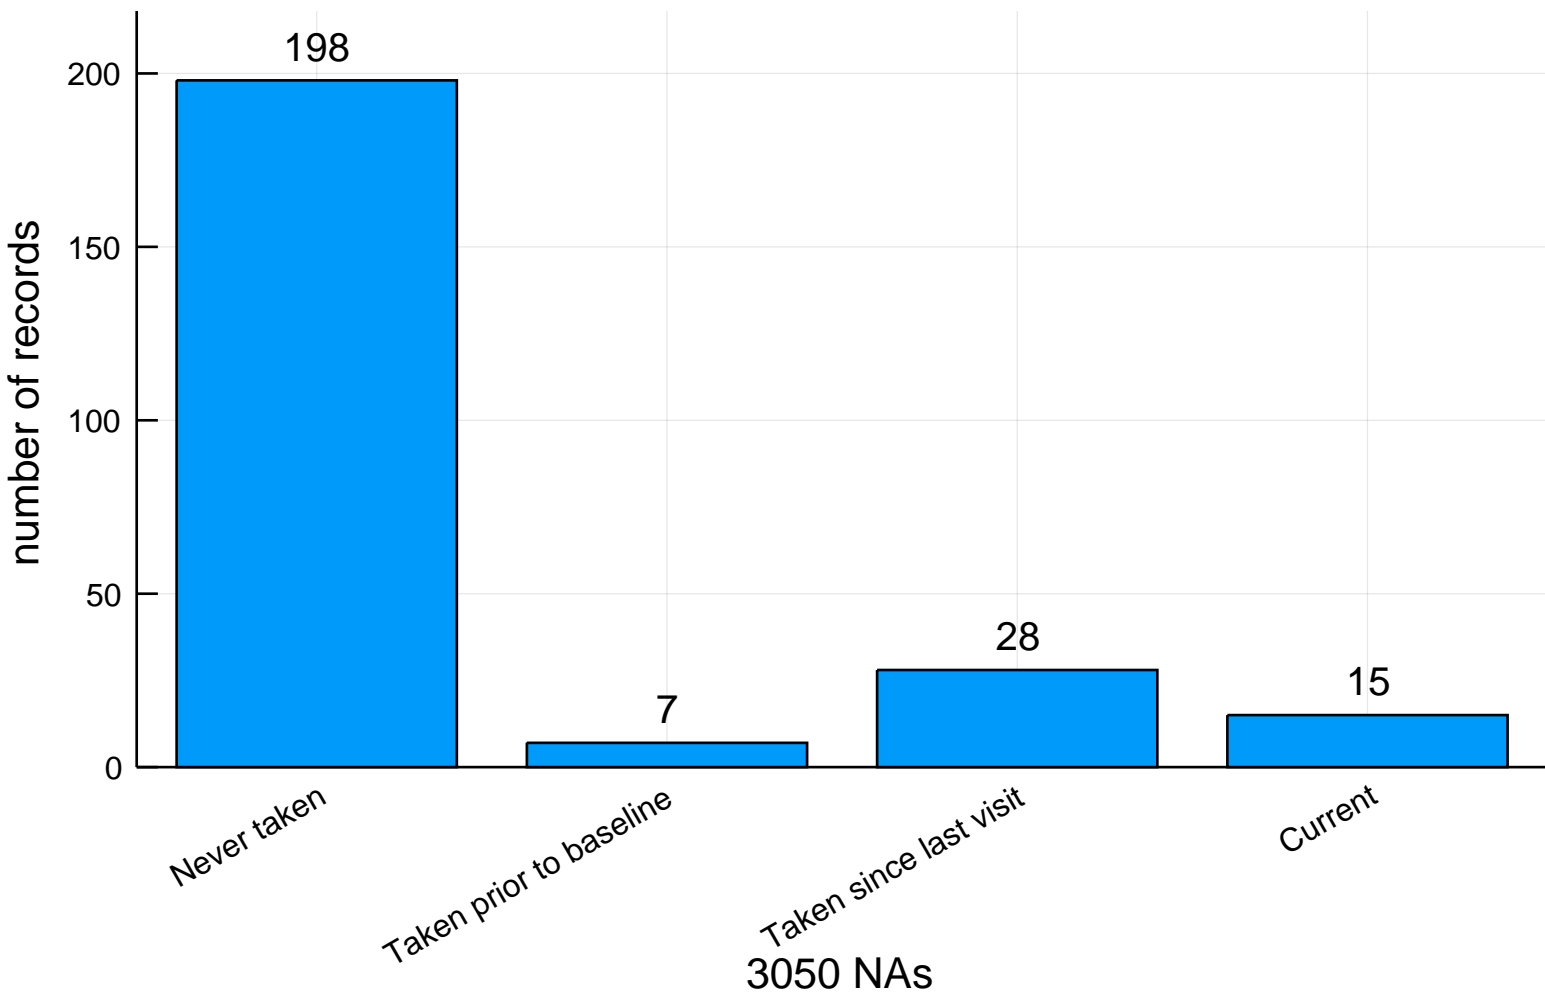

# Primary sclerosing cholangitis (per site\_sub\_coll)

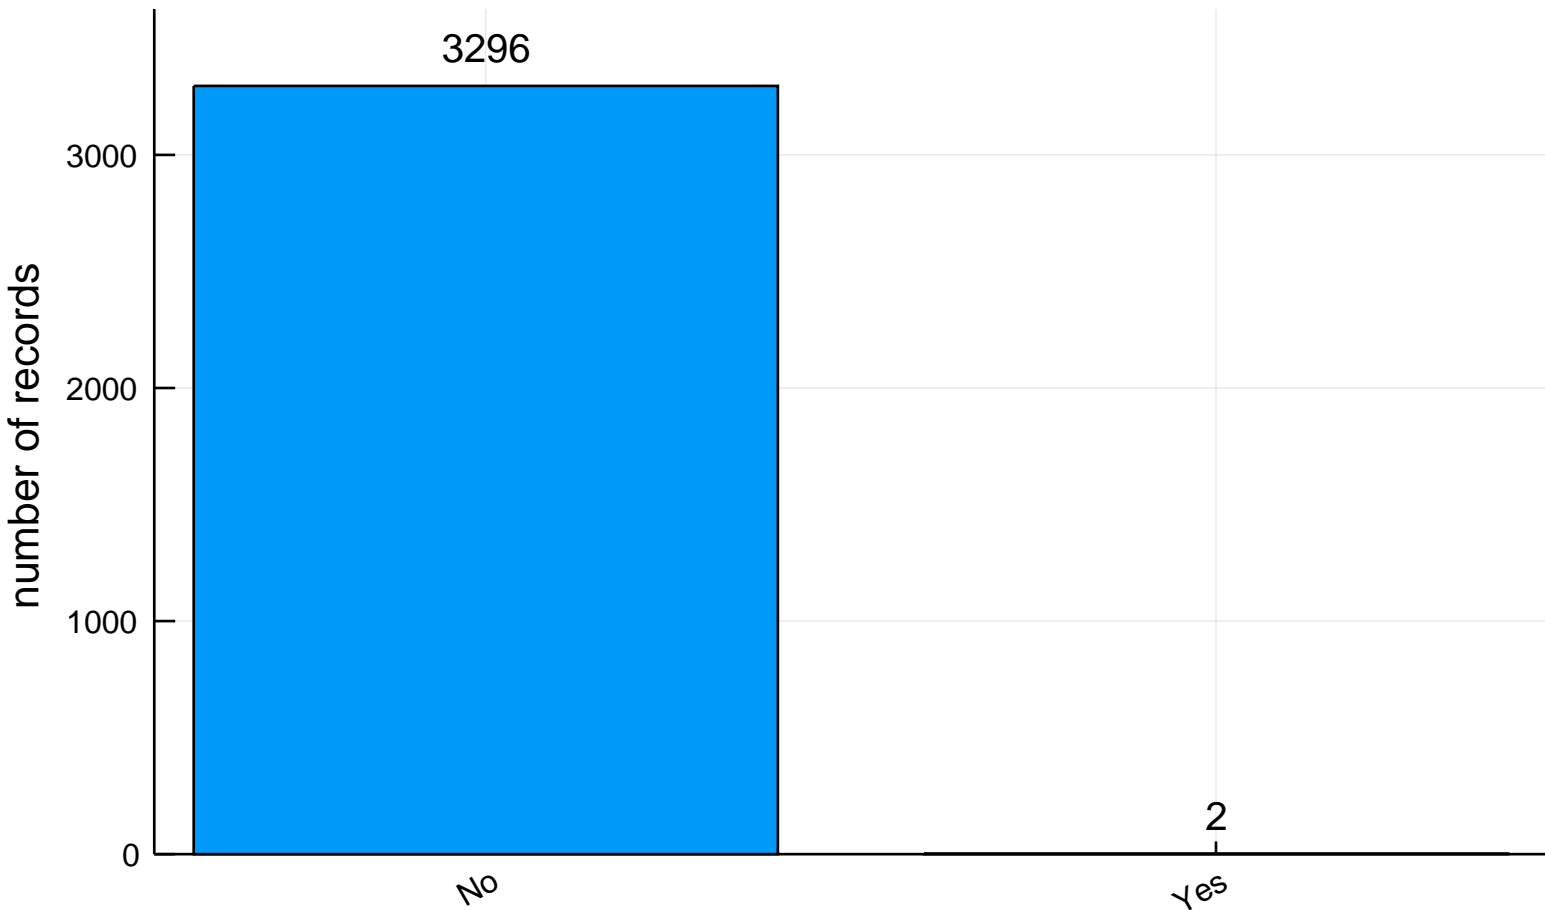

0 NAs

# Probiotic (per site\_sub\_coll)

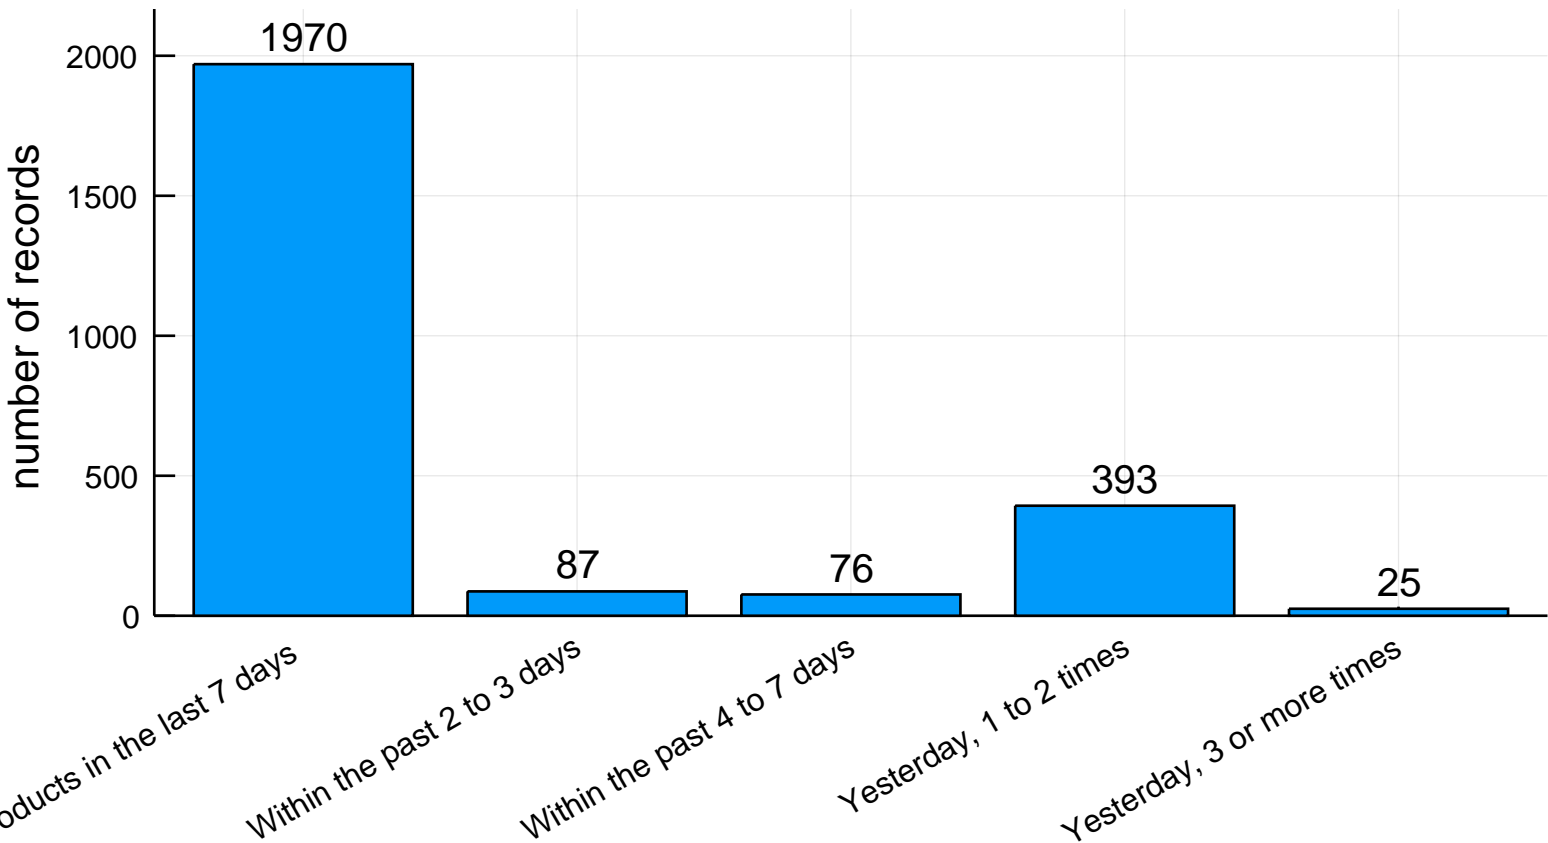

747 NAs

# Procedure (per Participant\_ID)

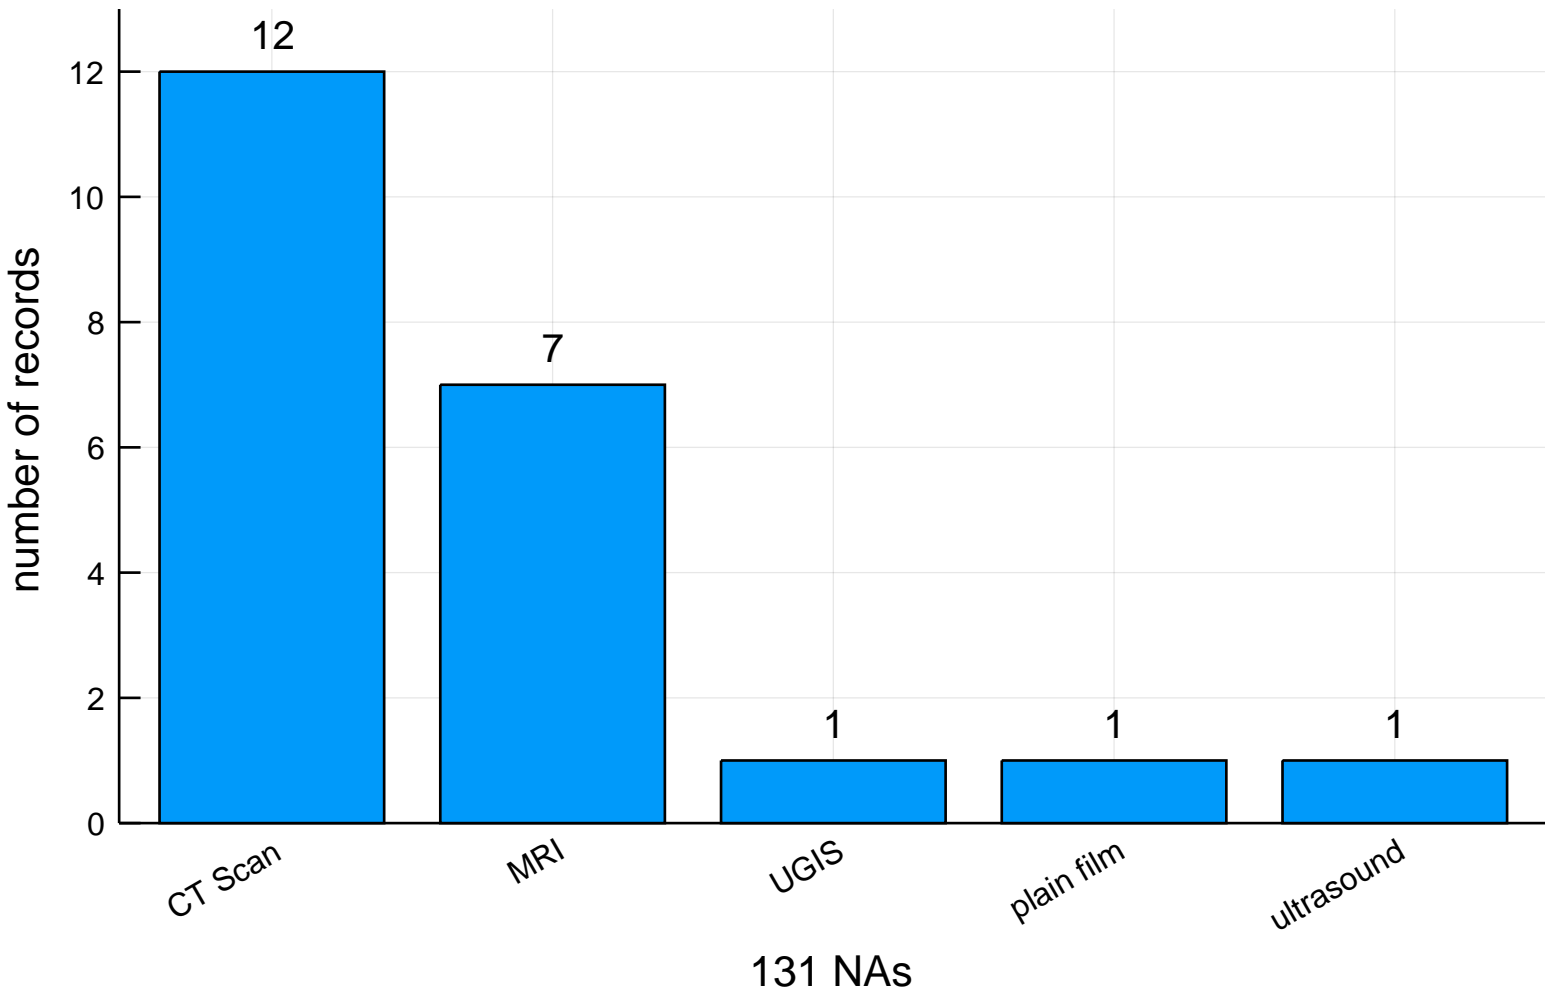

# Procedure 1 (per Participant\_ID)

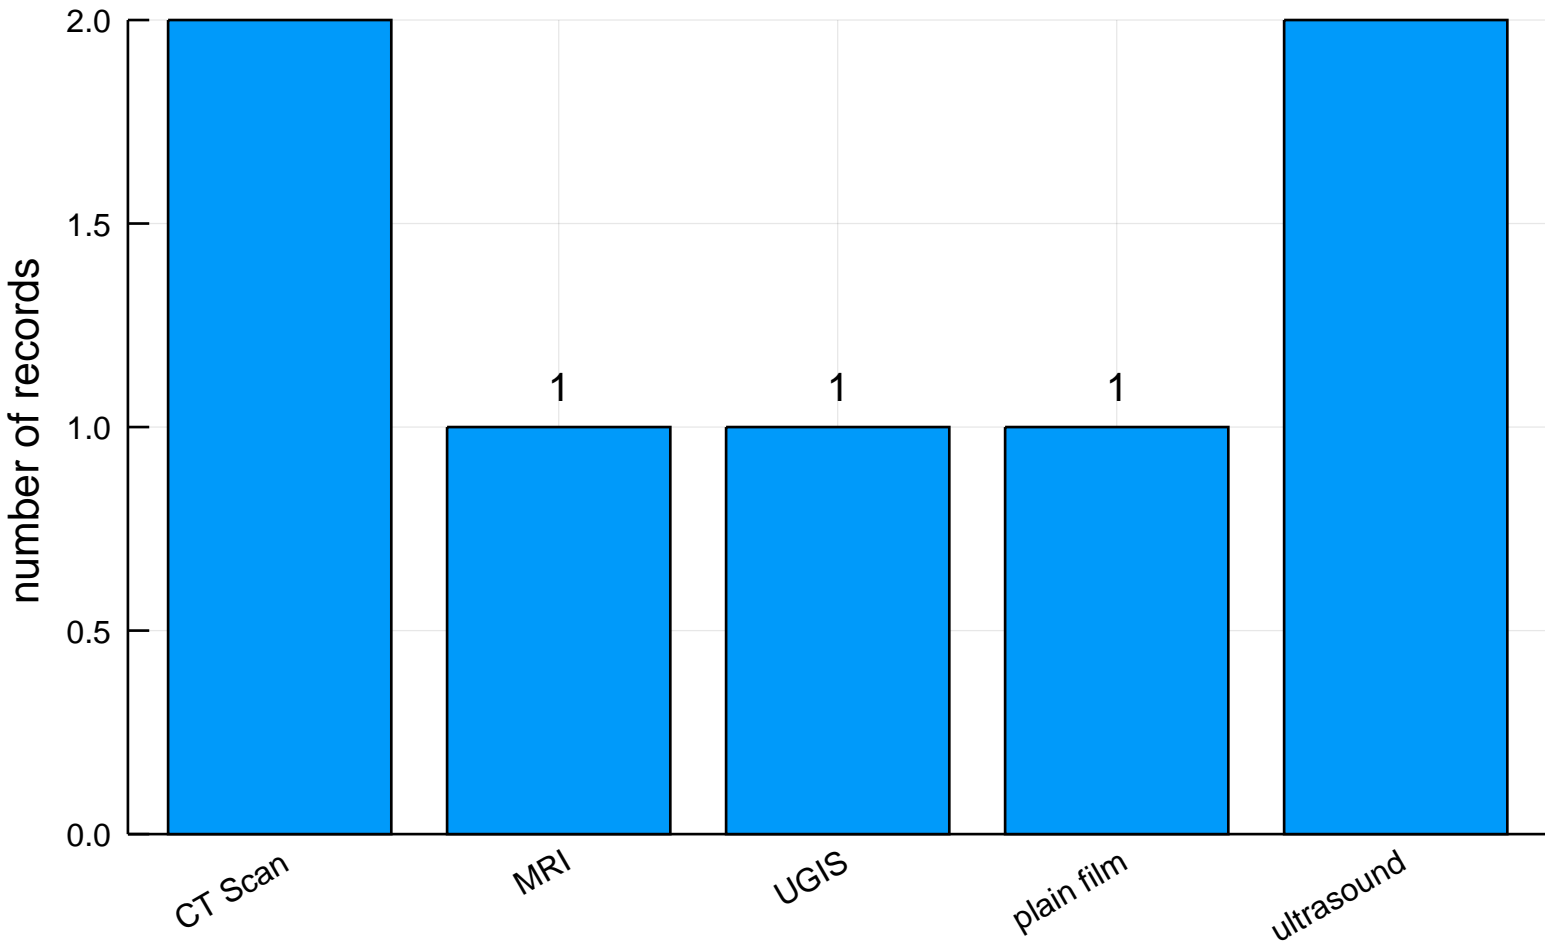

146 NAs



# Processed meat other red or white meat s (per row)

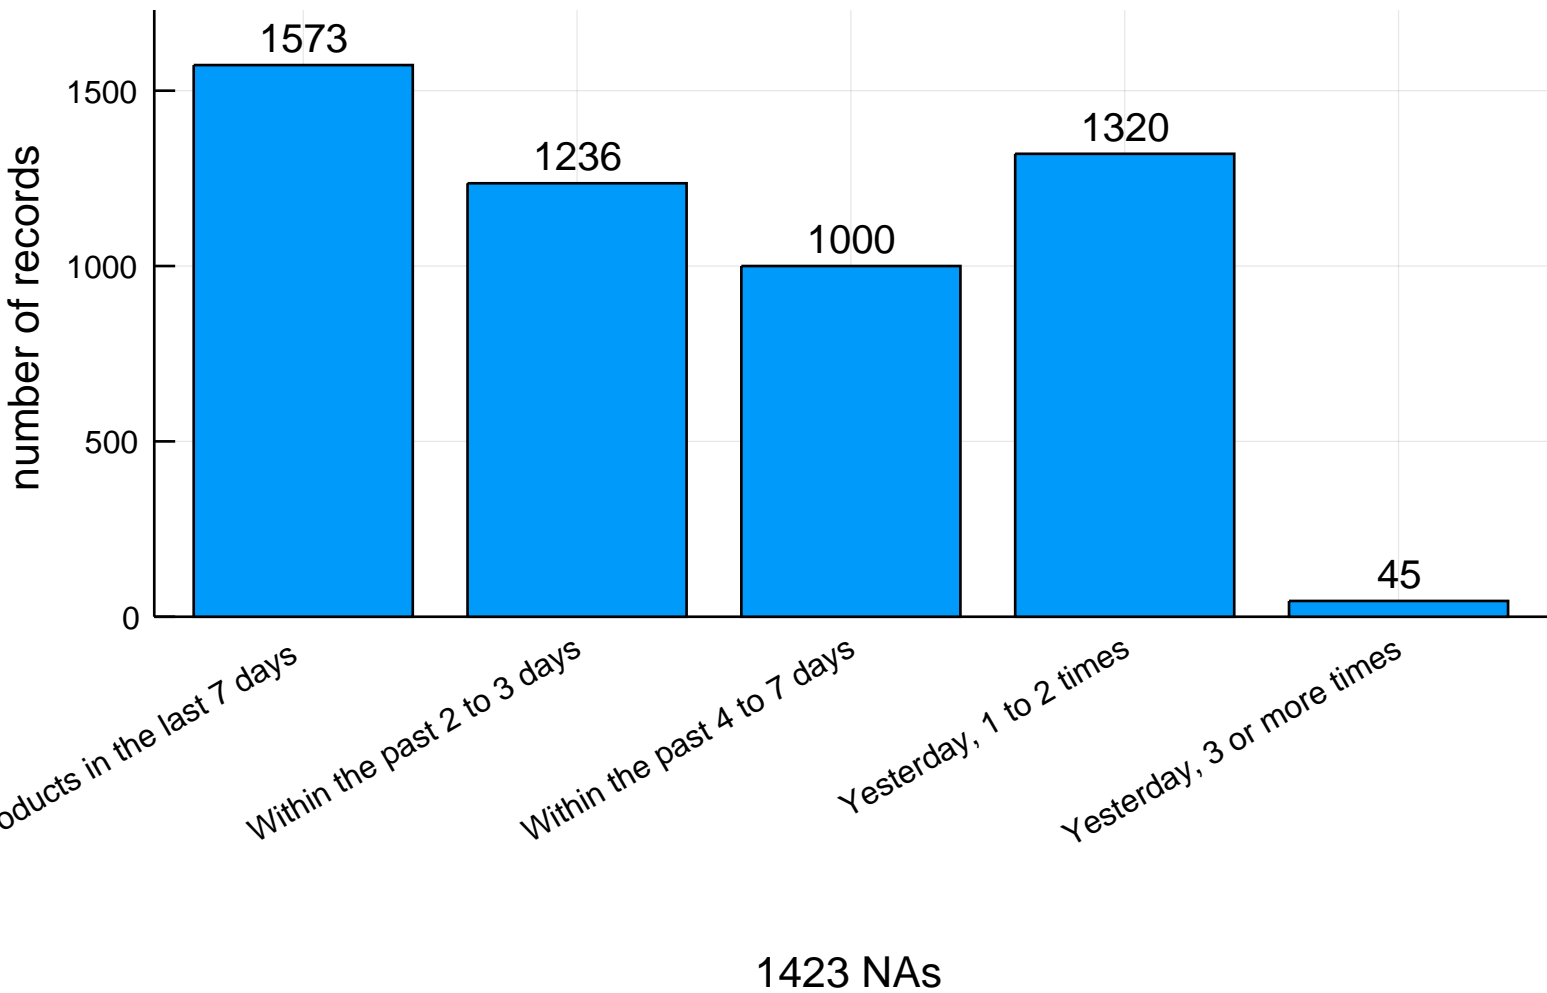

# ProjectSpecificID (per row)

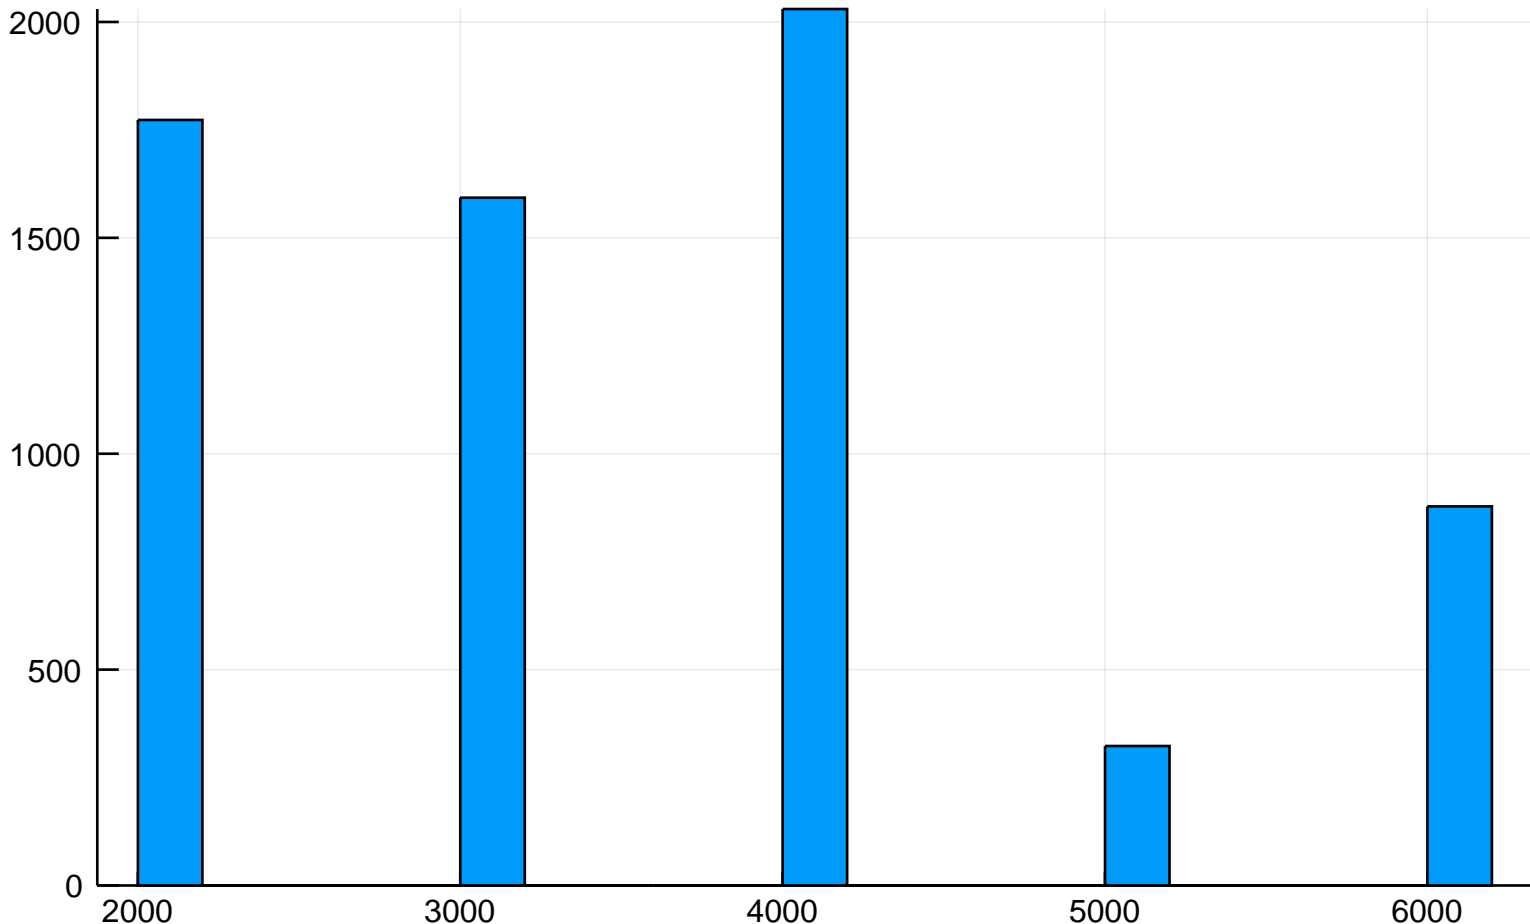

Mean: 3564.16, stdev: 1286.71

# Psoriasis (per site\_sub\_coll)

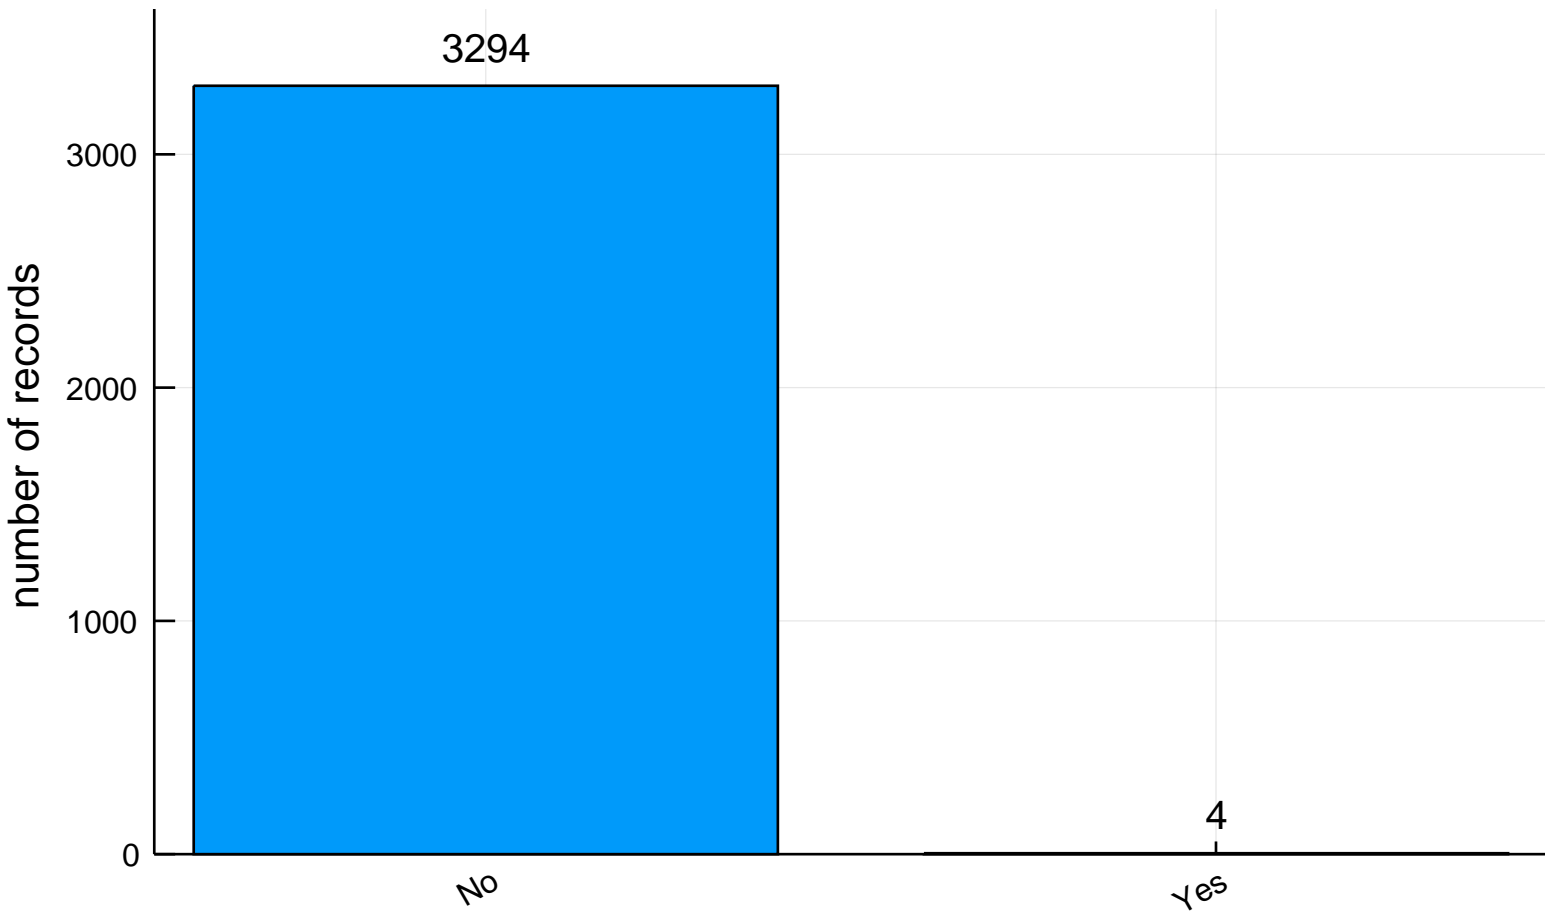

0 NAs

# Pyoderma gangrenosum (per site\_sub\_coll)

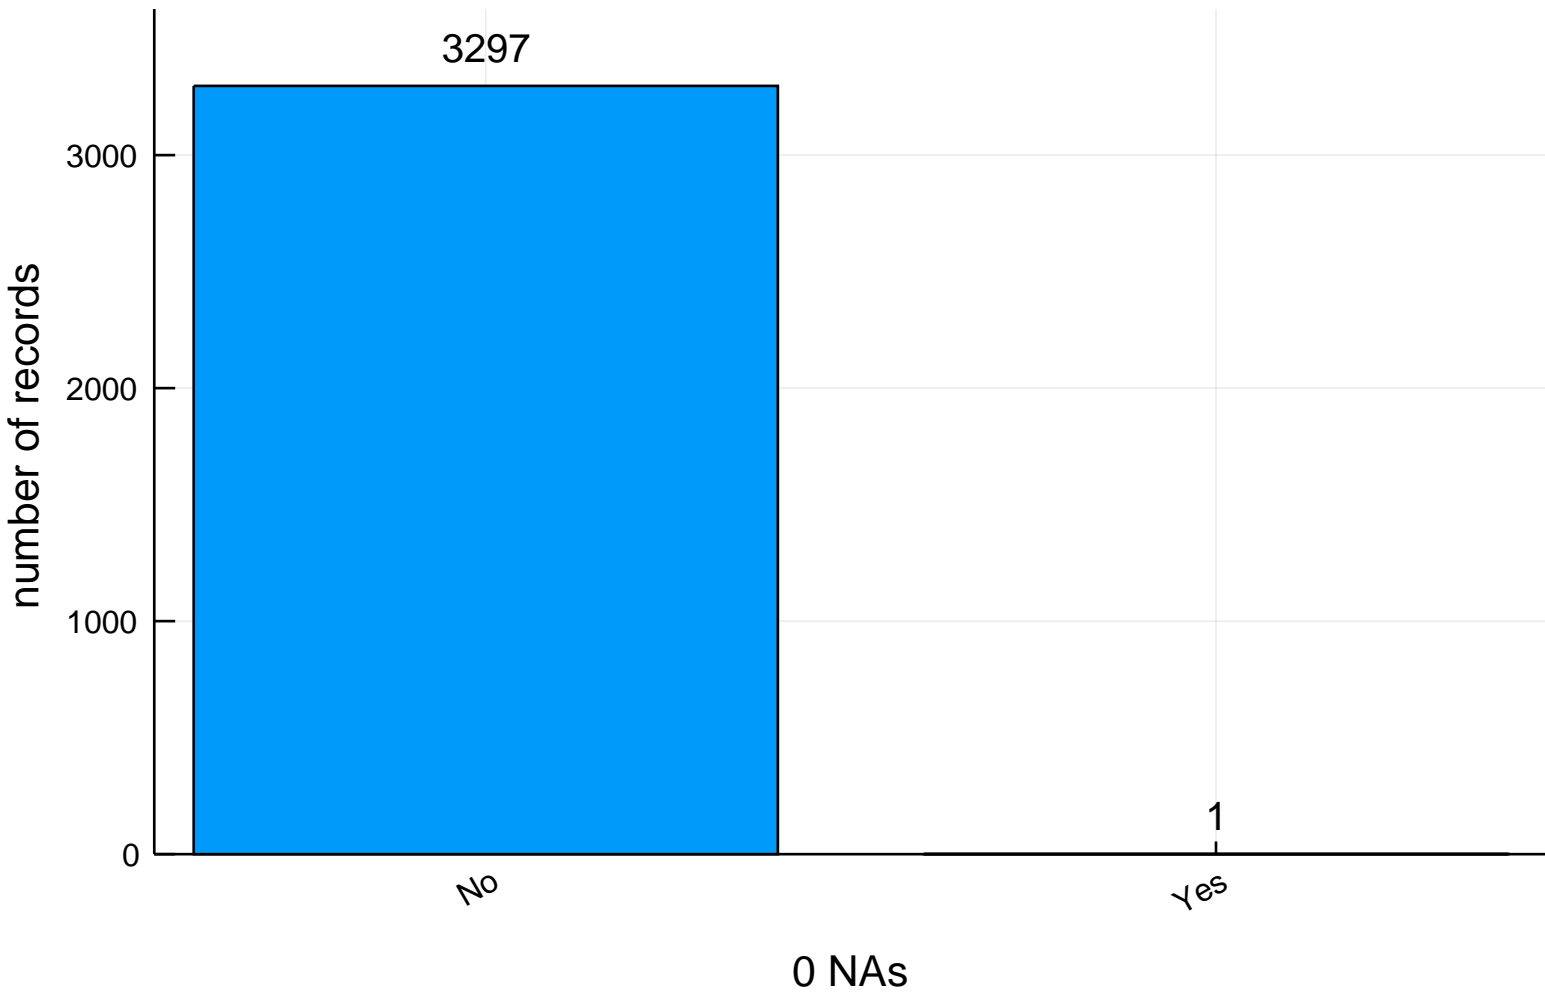

# race (per row)

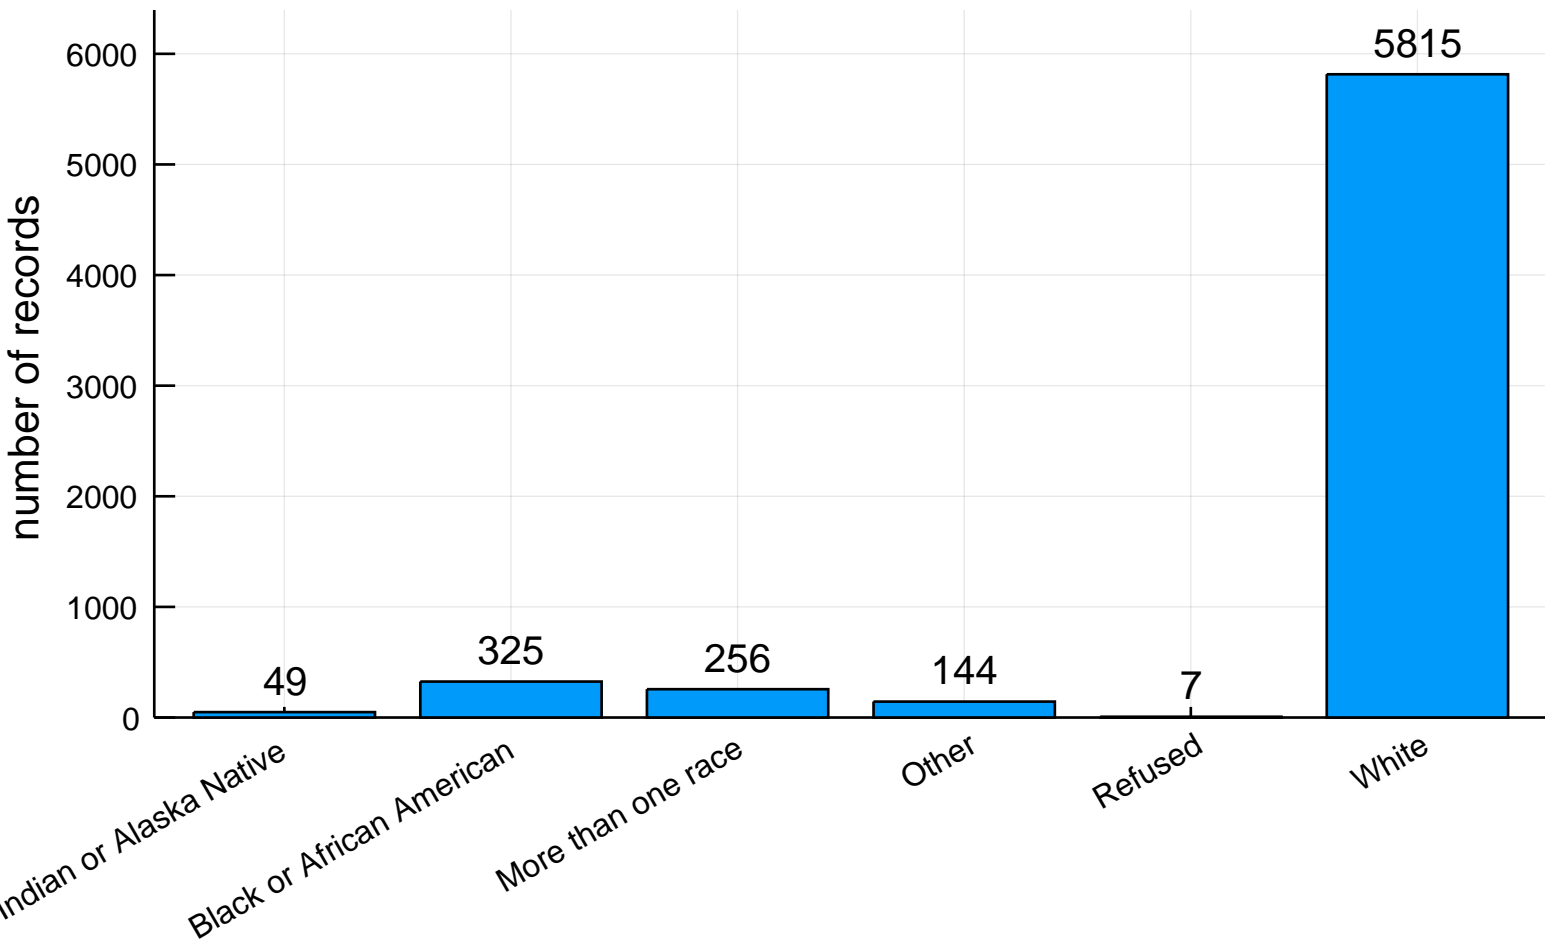

1 NAs

# Reason for stopping Asacol (per Participant\_ID)

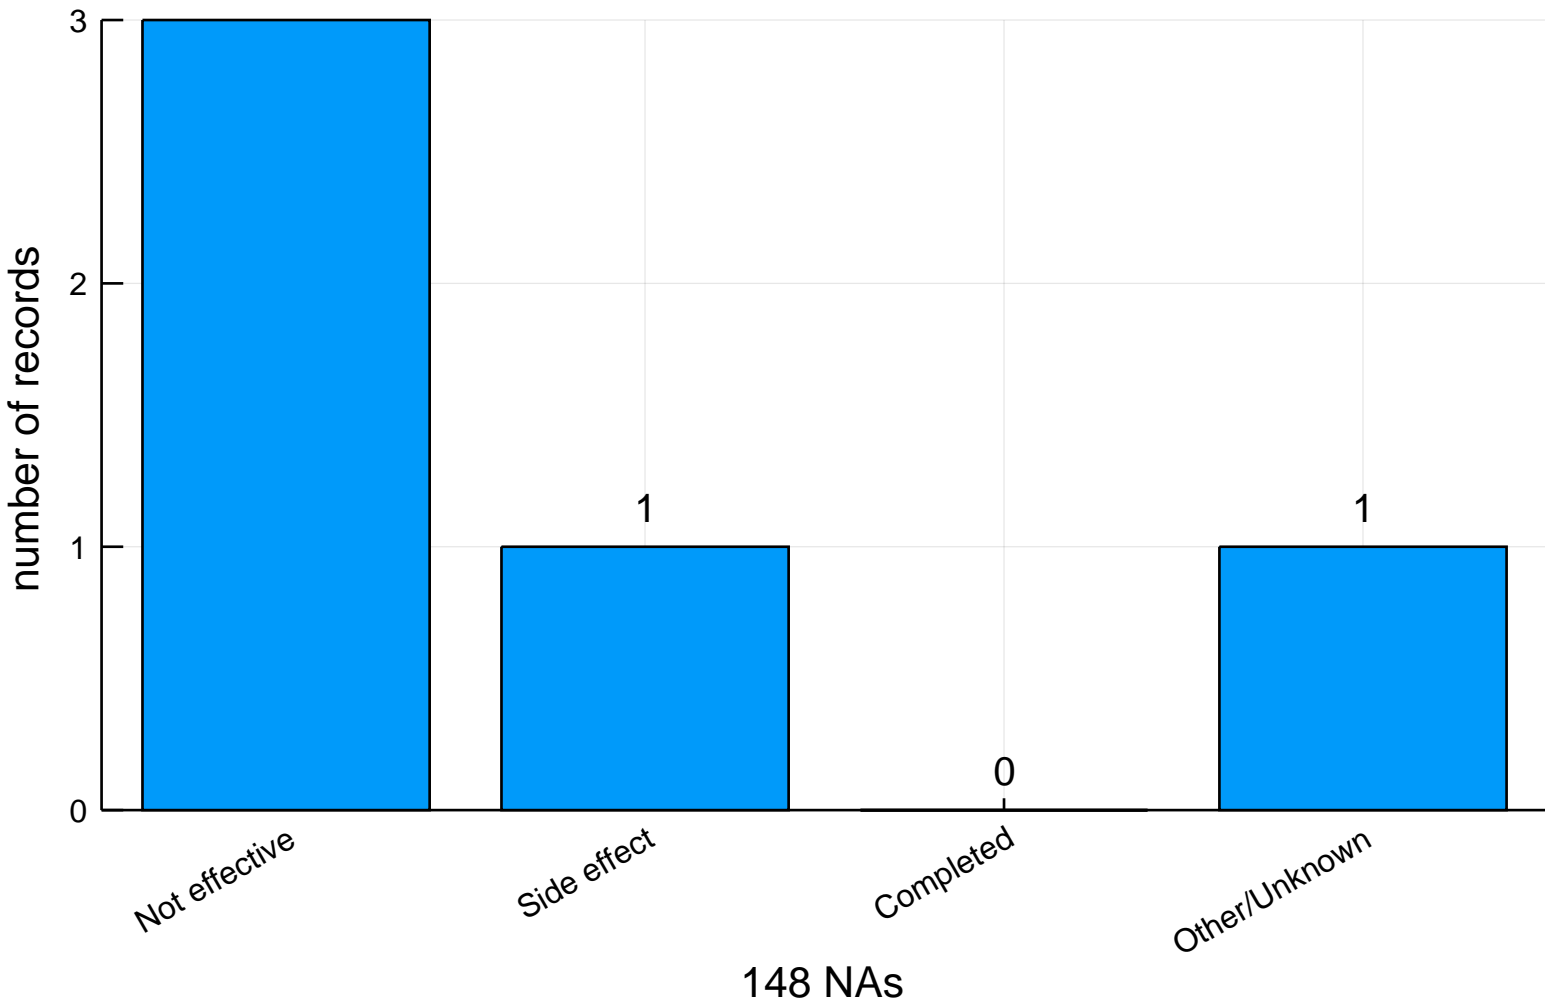

# Reason for stopping canasa suppositories (per site\_sub\_coll)

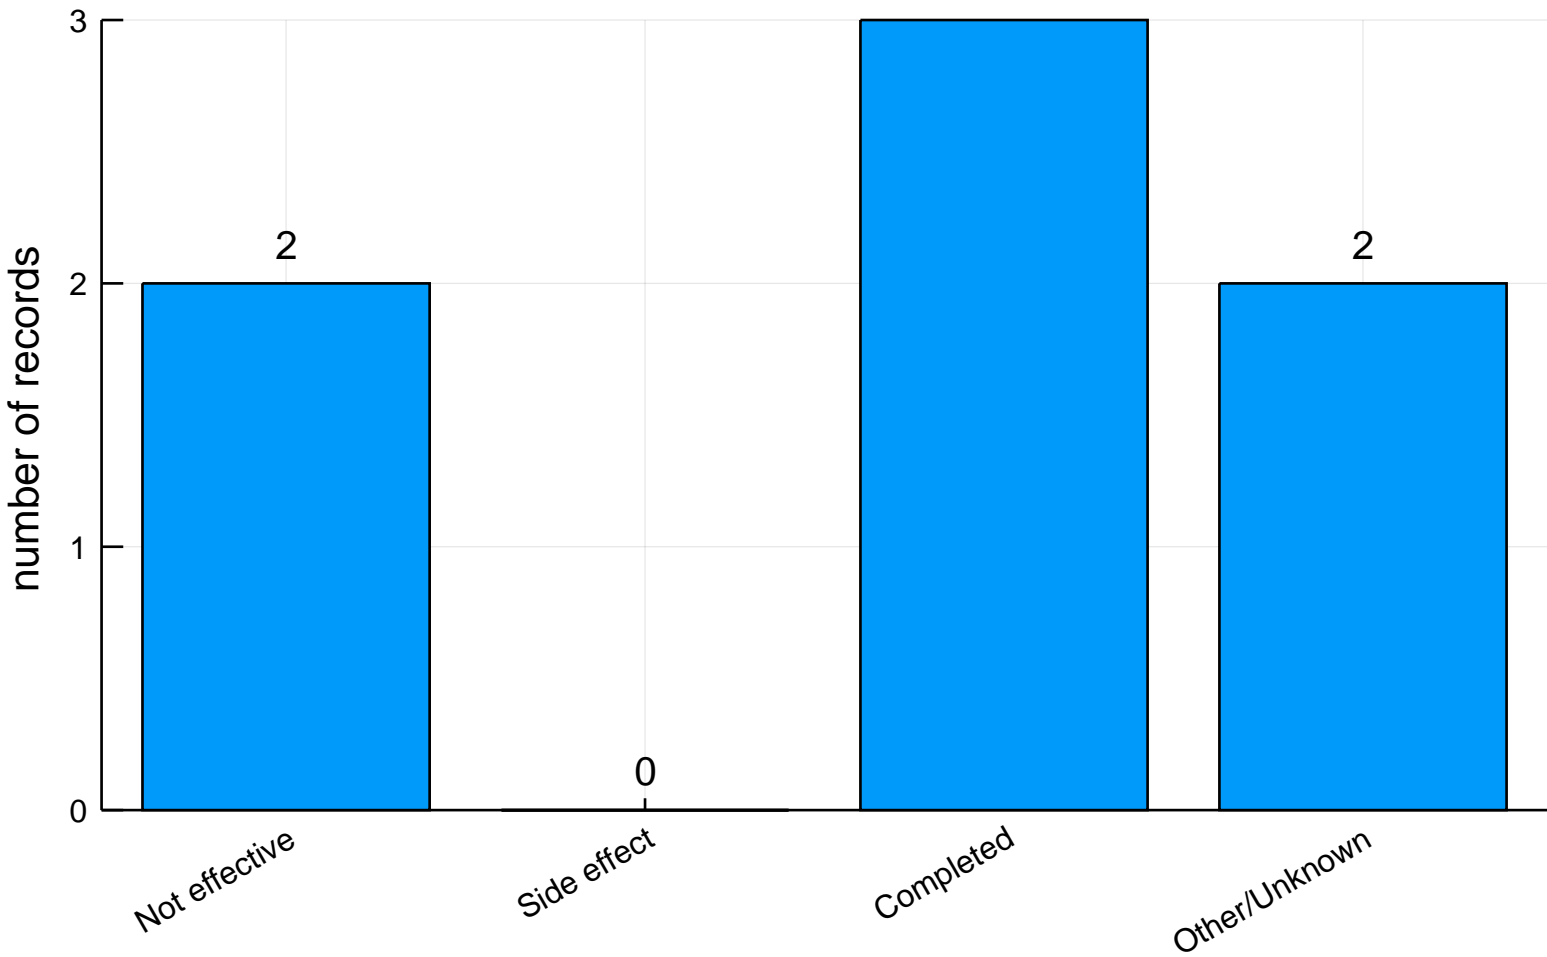

3291 NAs

# Reason for stopping Cipro (per Participant\_ID)

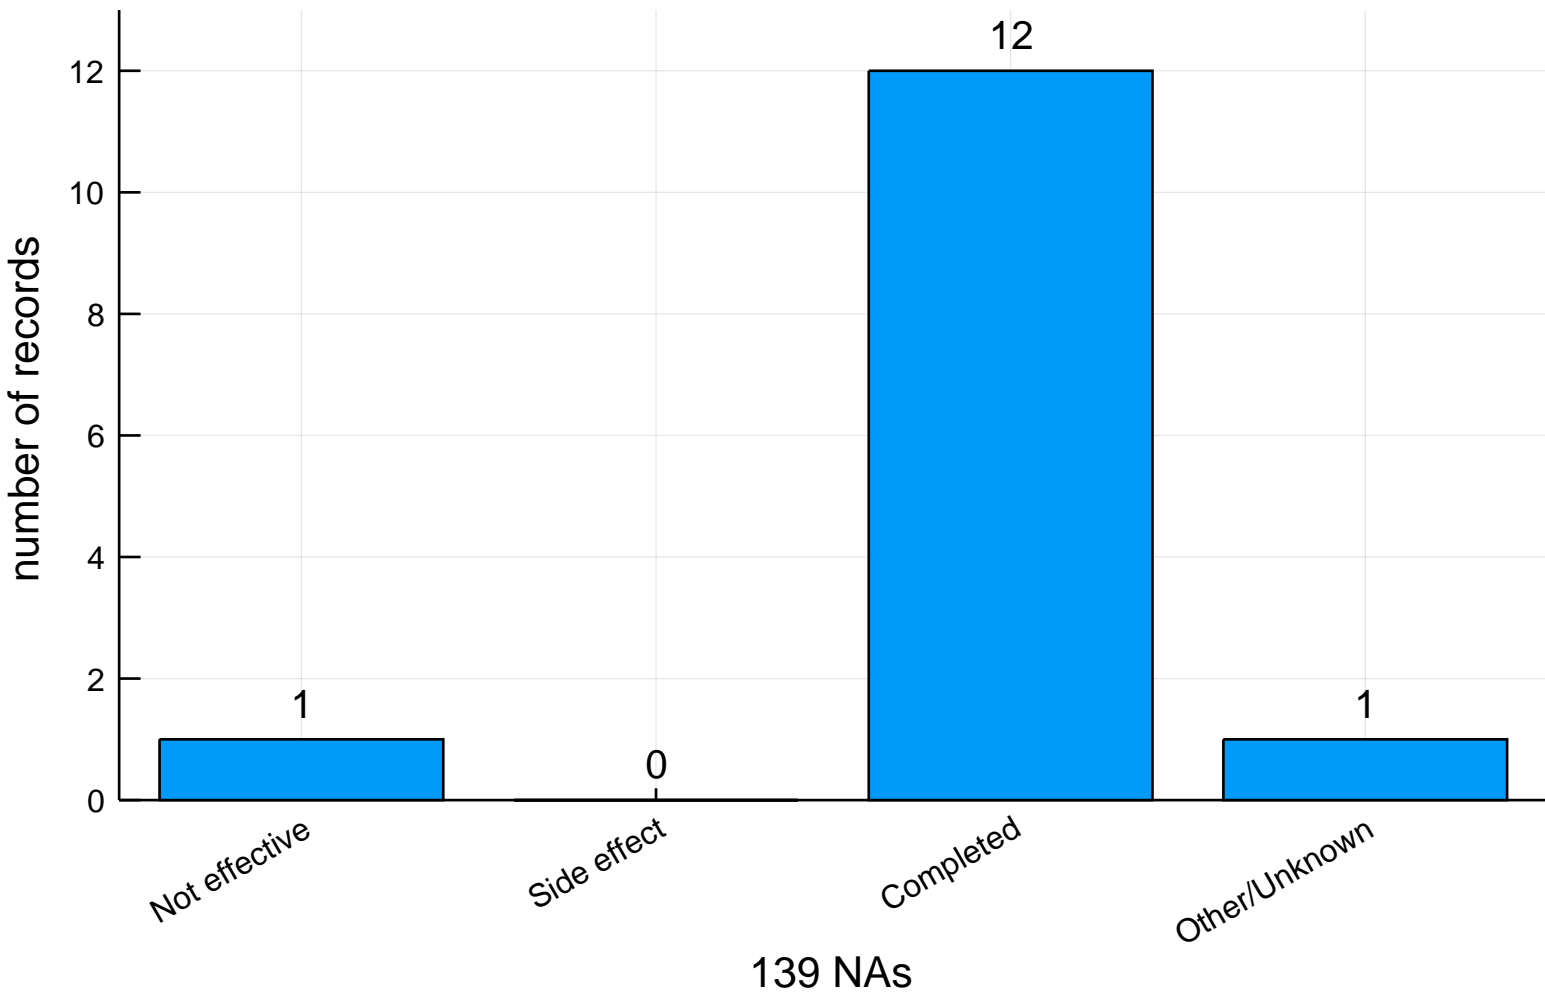



# Reason for stopping Entocort (per Participant\_ID)

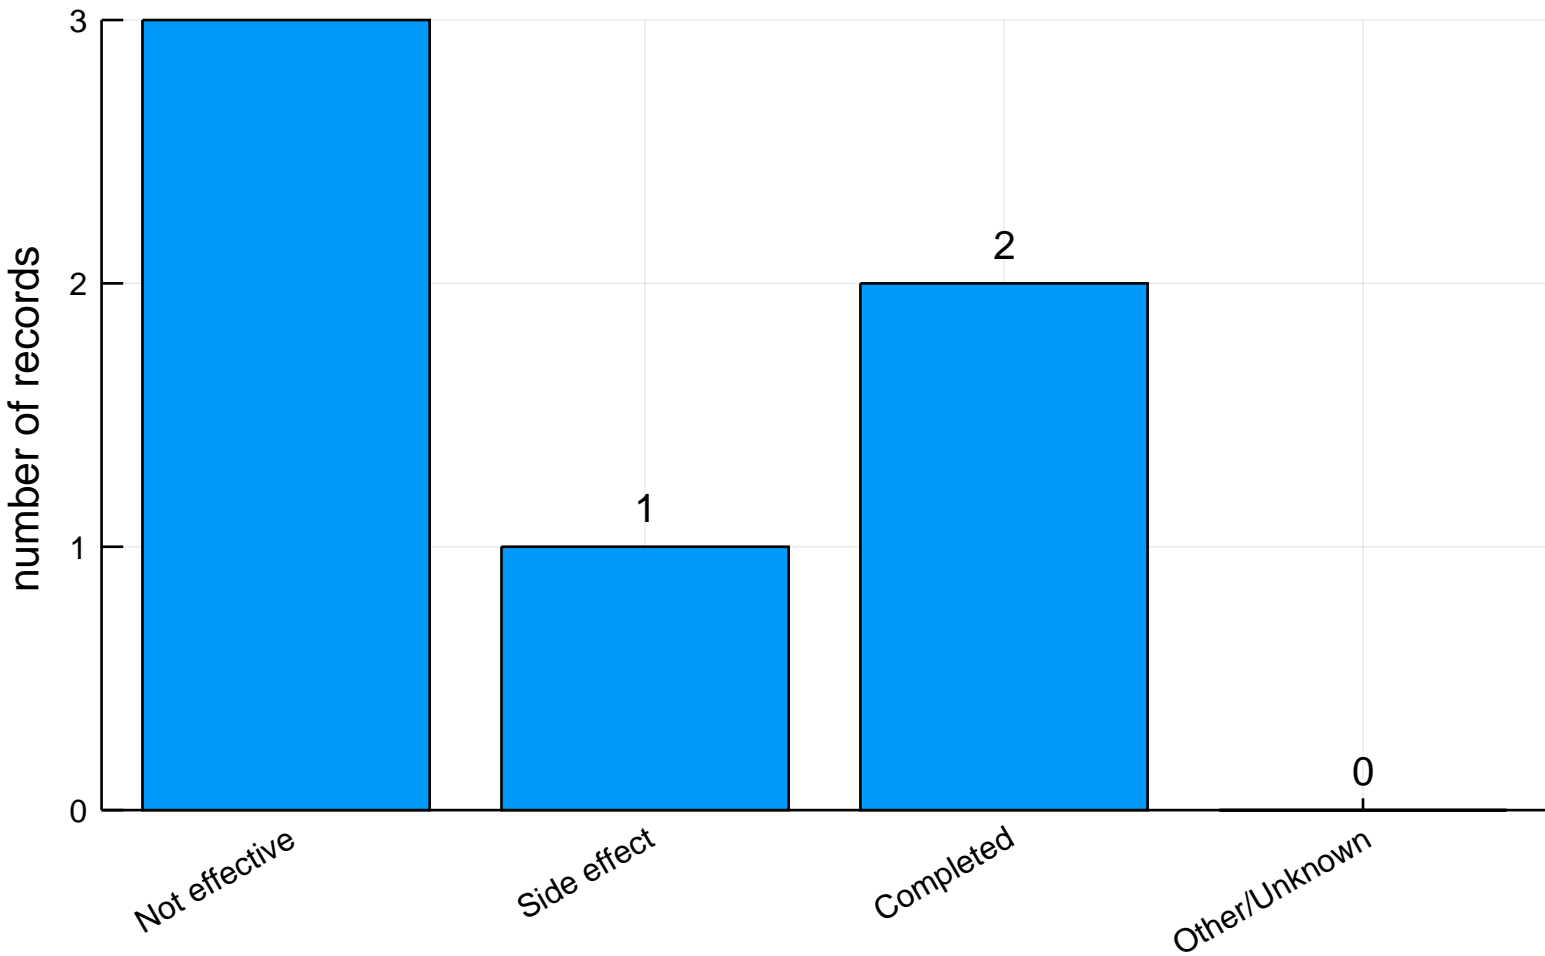

147 NAs

# Reason for stopping Flagyl (per Participant\_ID)

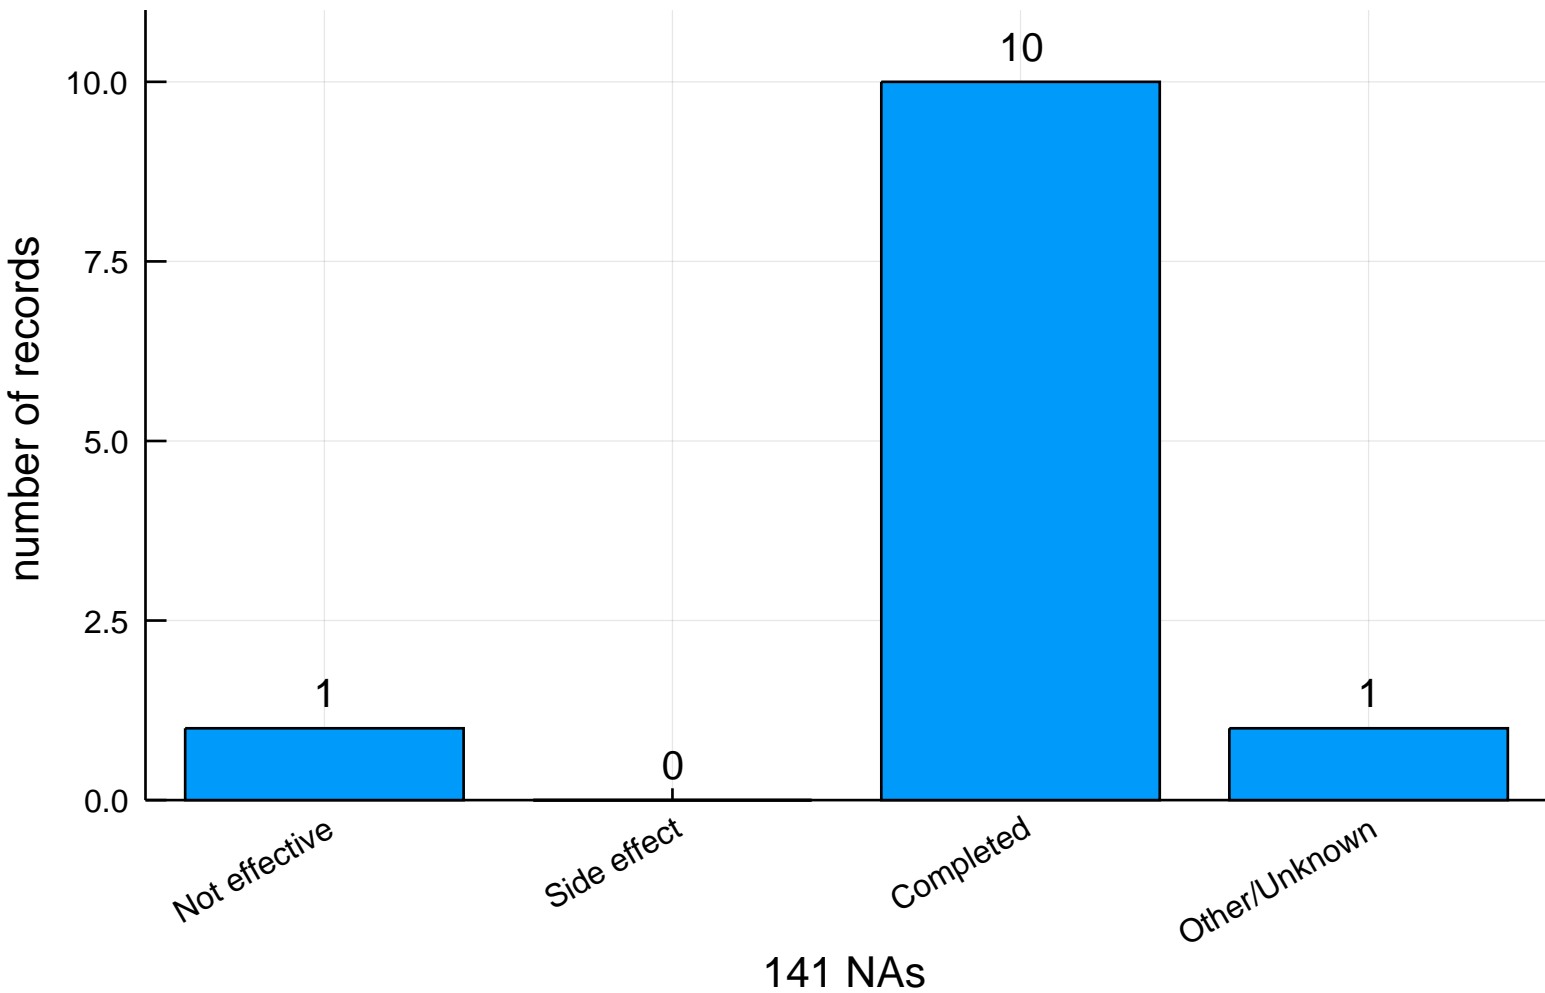

# Reason for stopping IV steroids (per Participant\_ID)

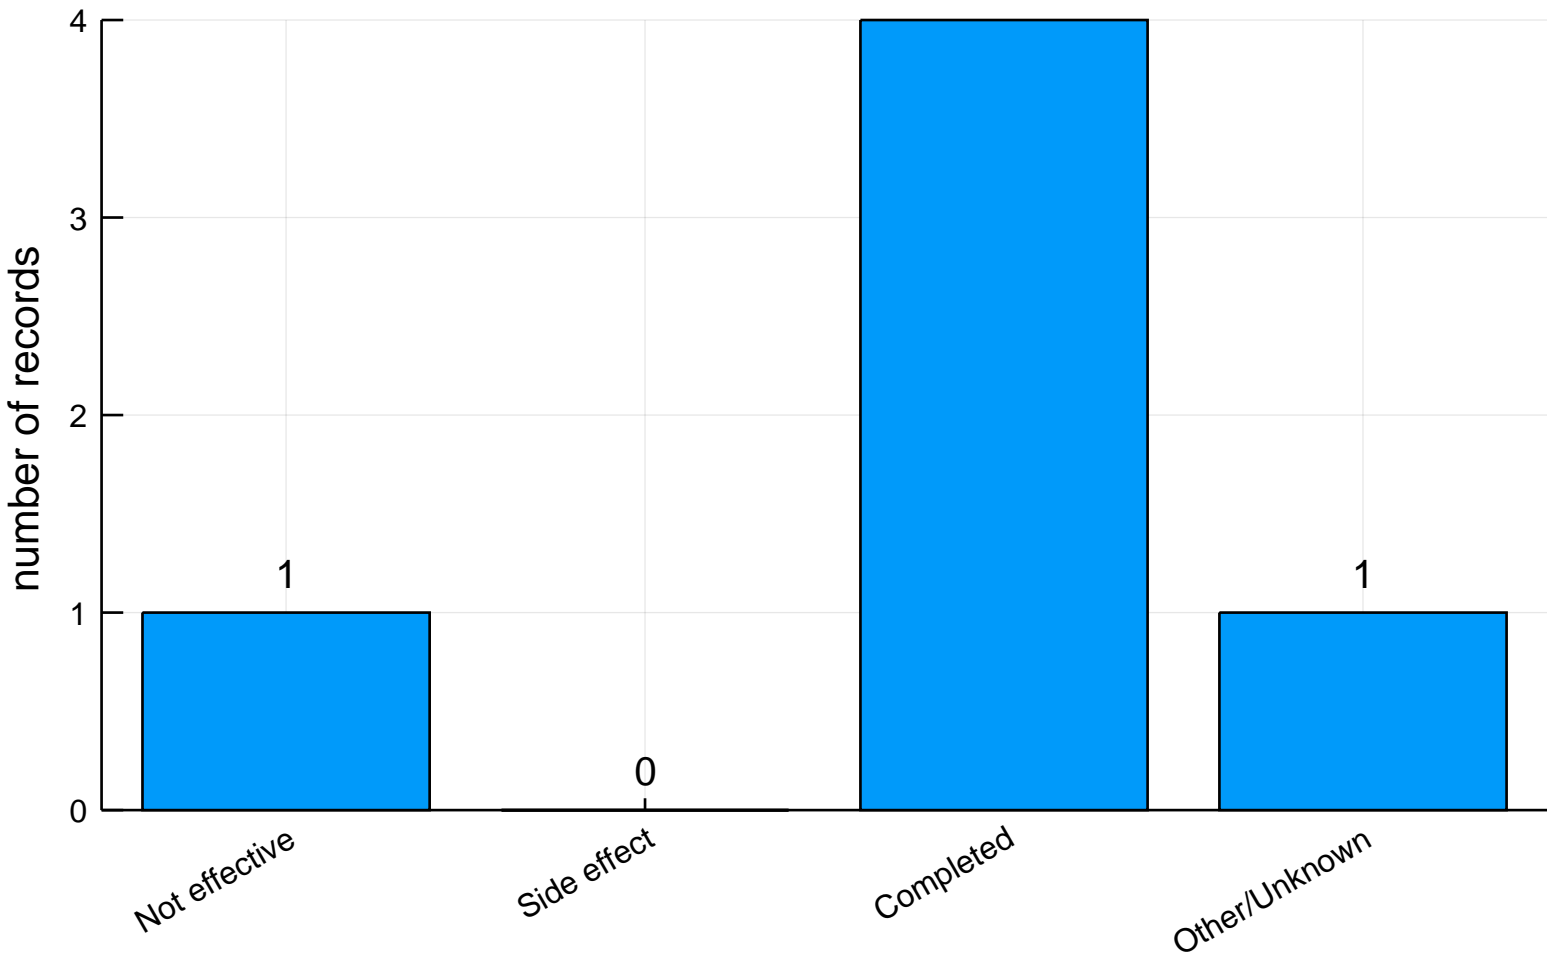

147 NAs

# Reason for stopping other antibiotic (per Participant\_ID)

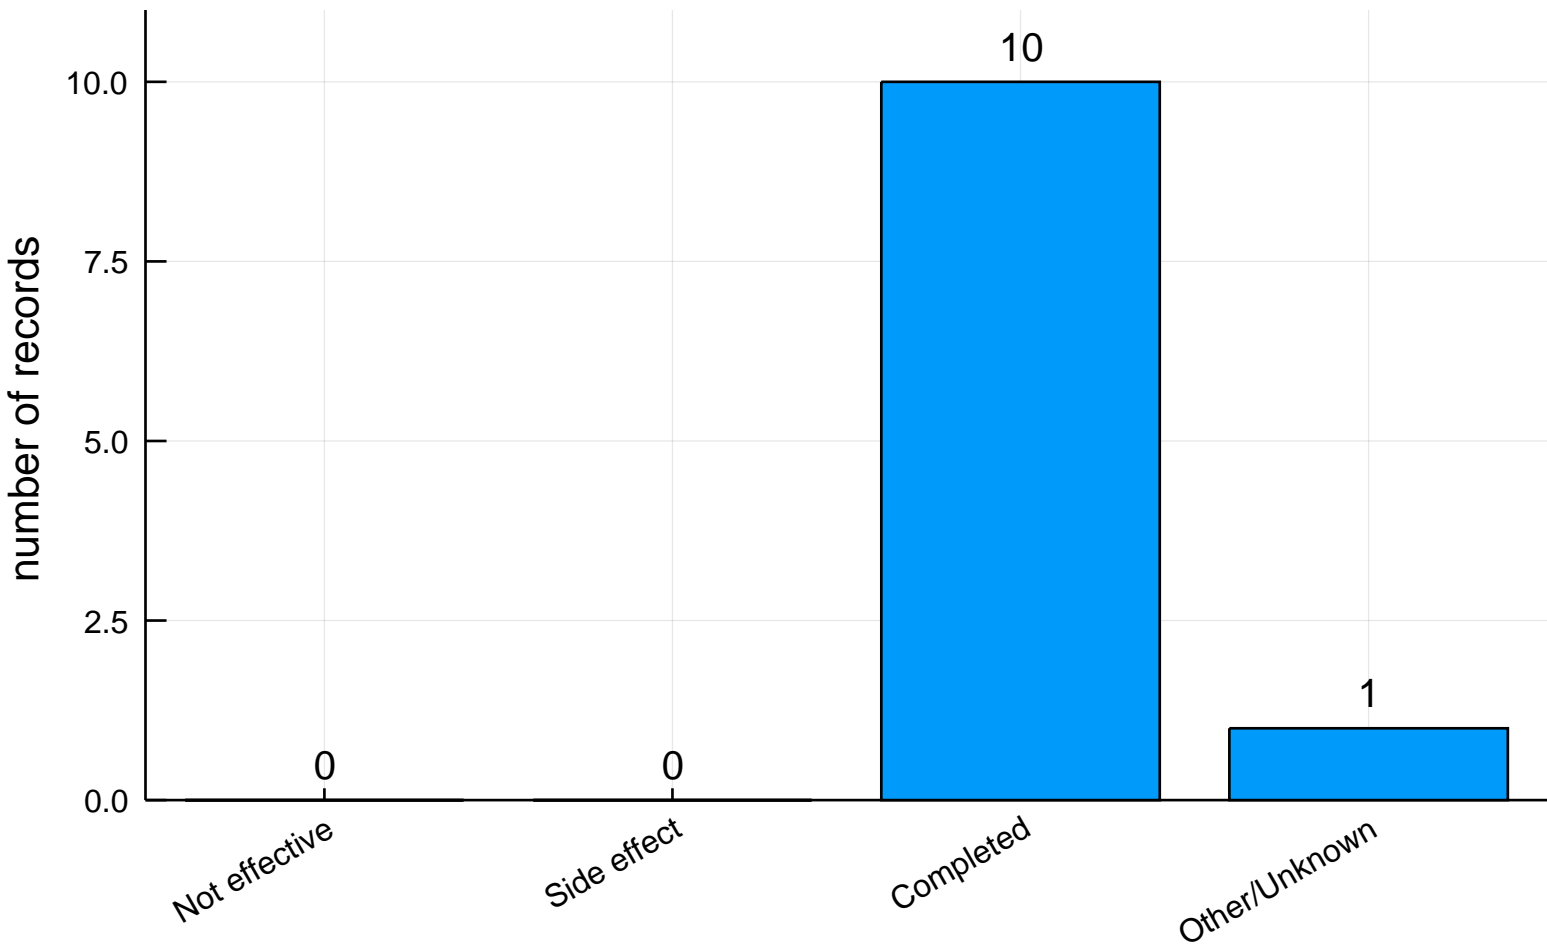

142 NAs

# Reason for stopping Pentasa (per Participant\_ID)

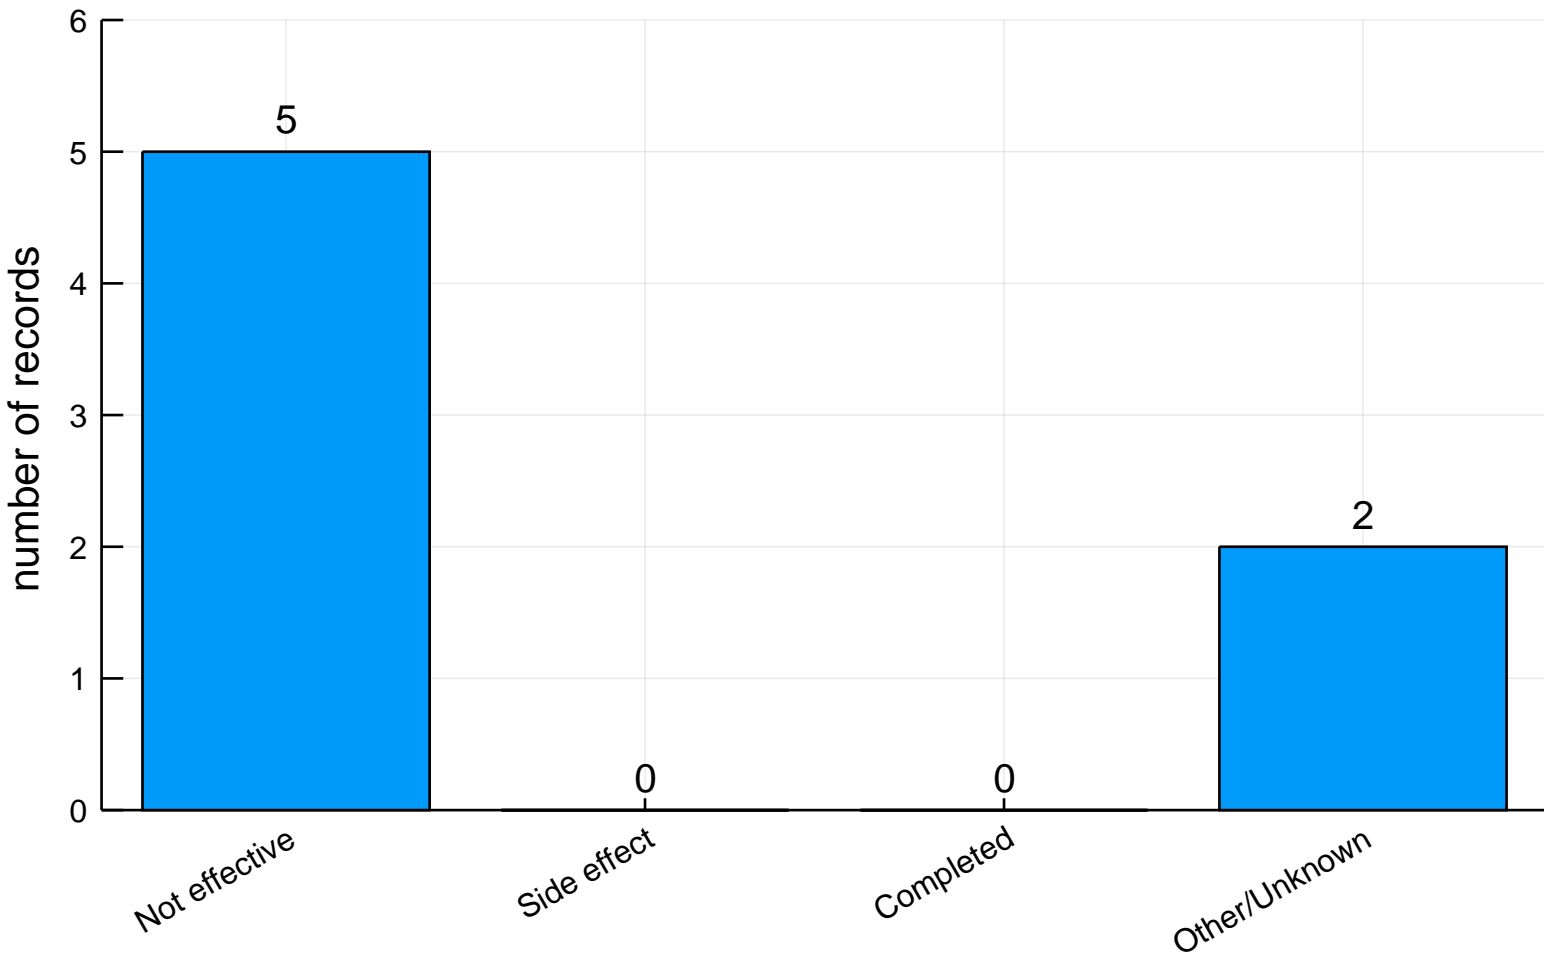

146 NAs

# Reason for stopping Prednisone (per site\_sub\_coll)

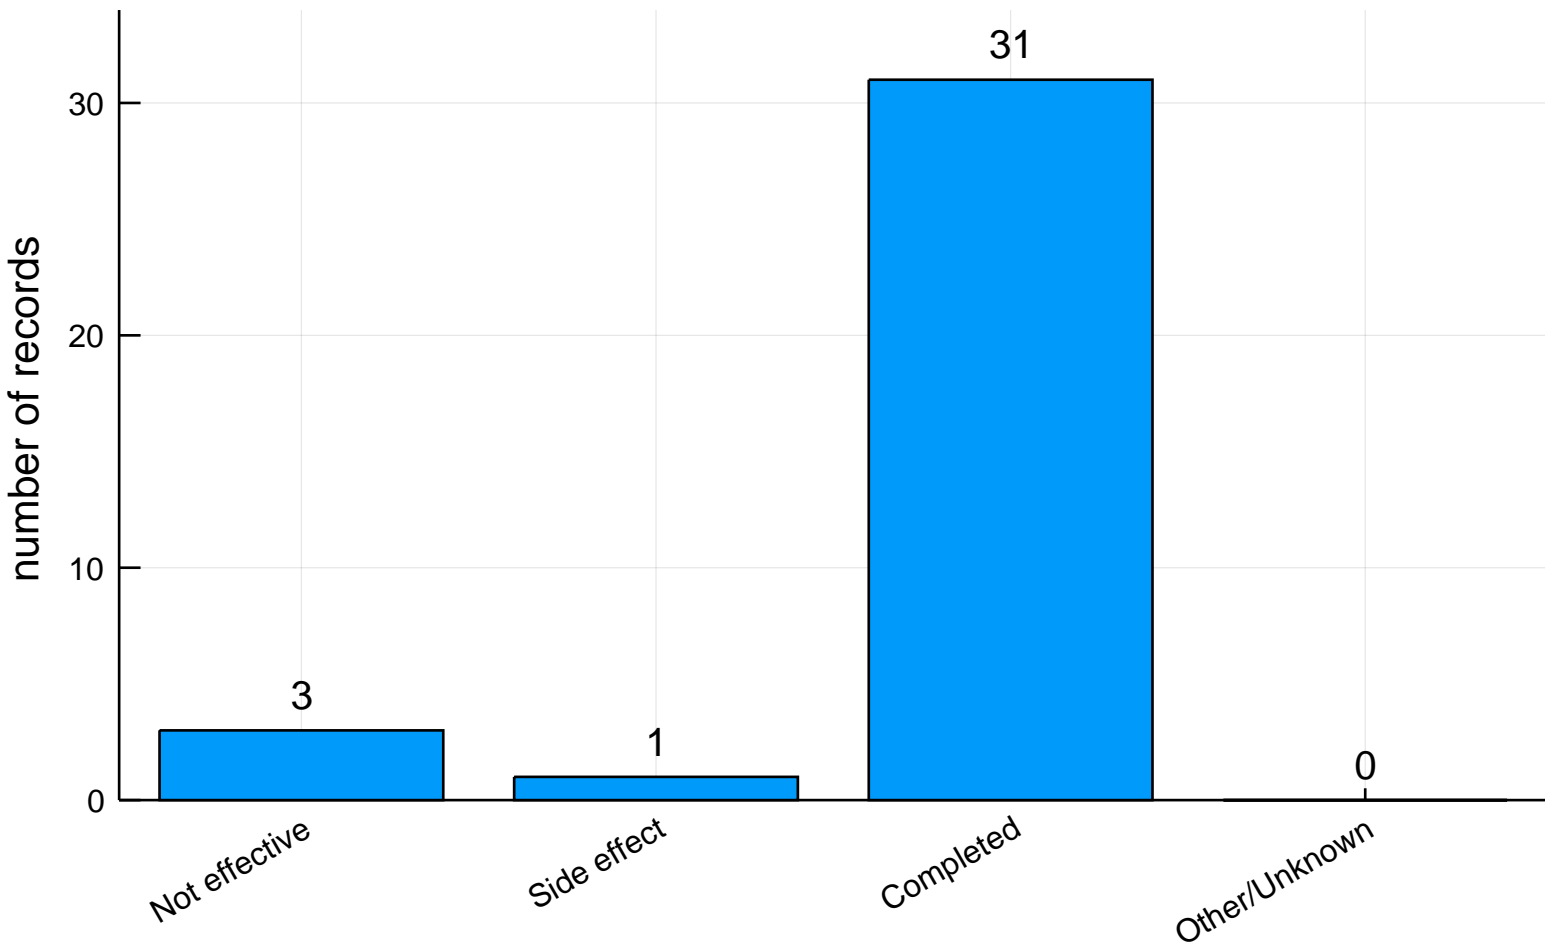

3263 NAs

# Reason for withdrawal or termination (per Participant\_ID)

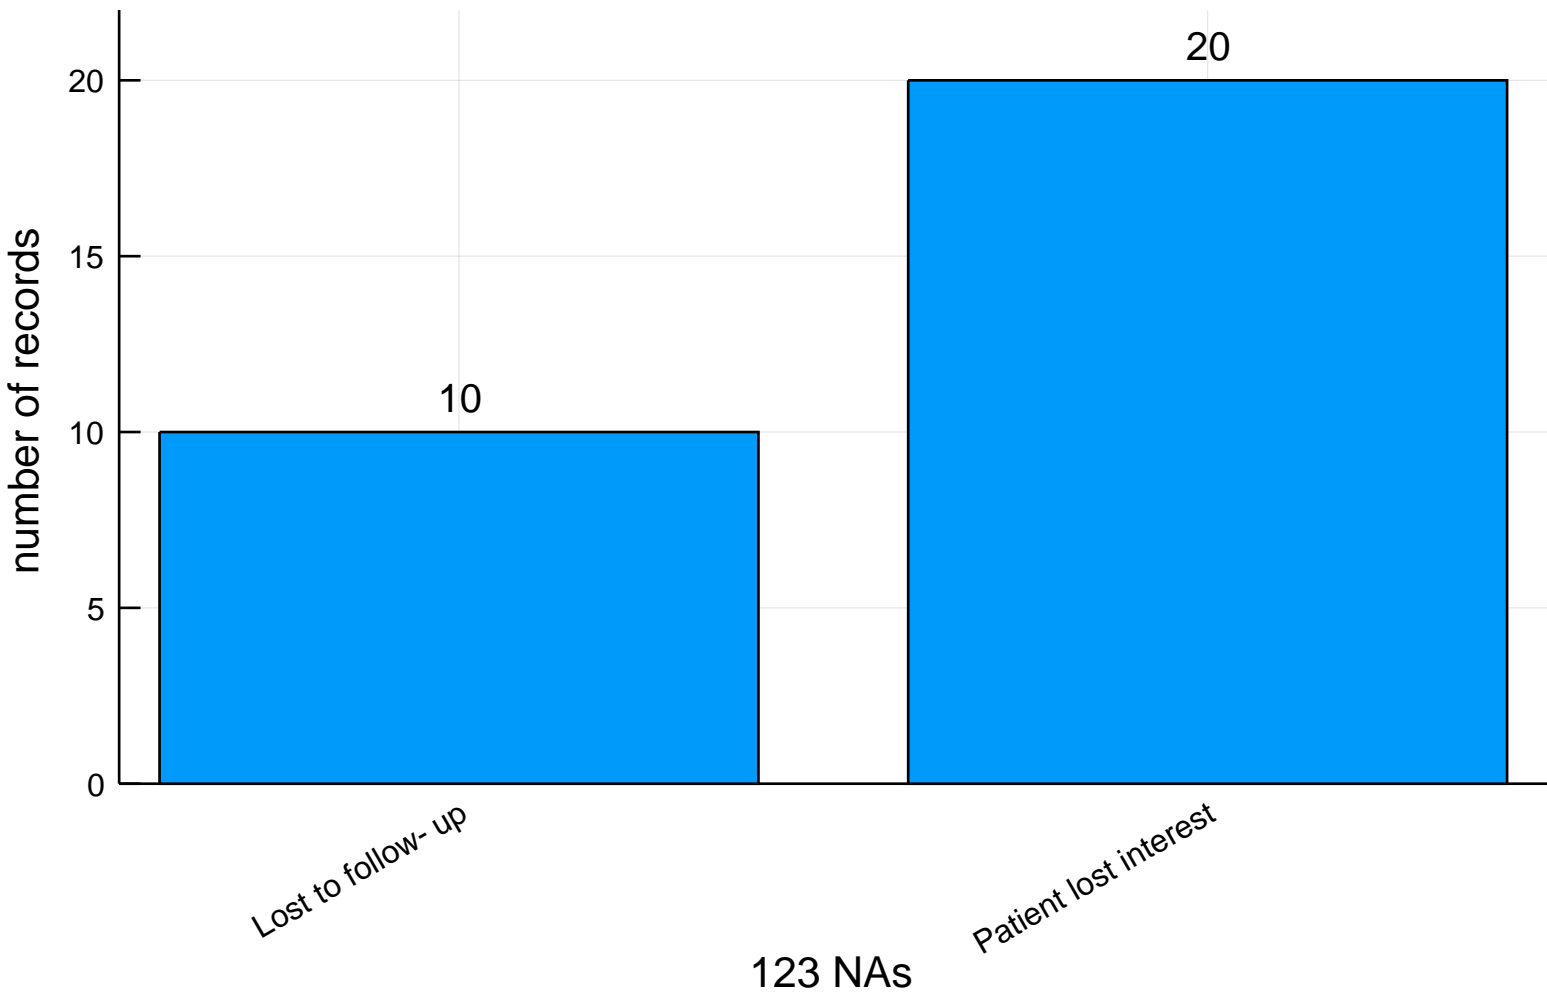

# Rectum (per row)

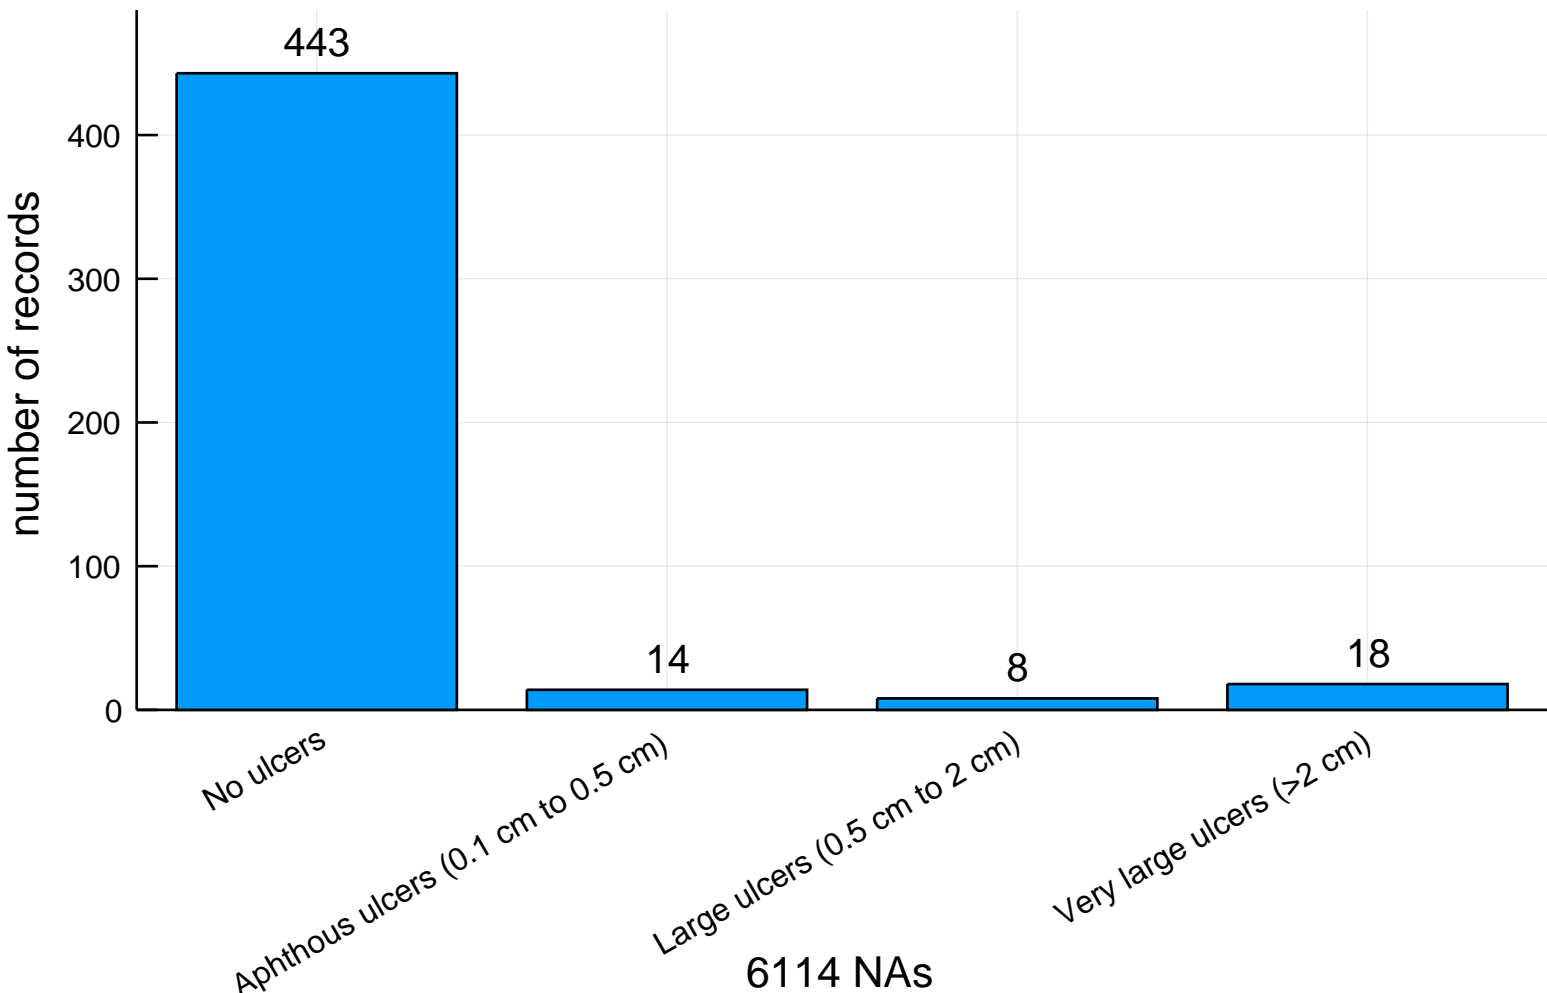



# Rectum 1 (per row)

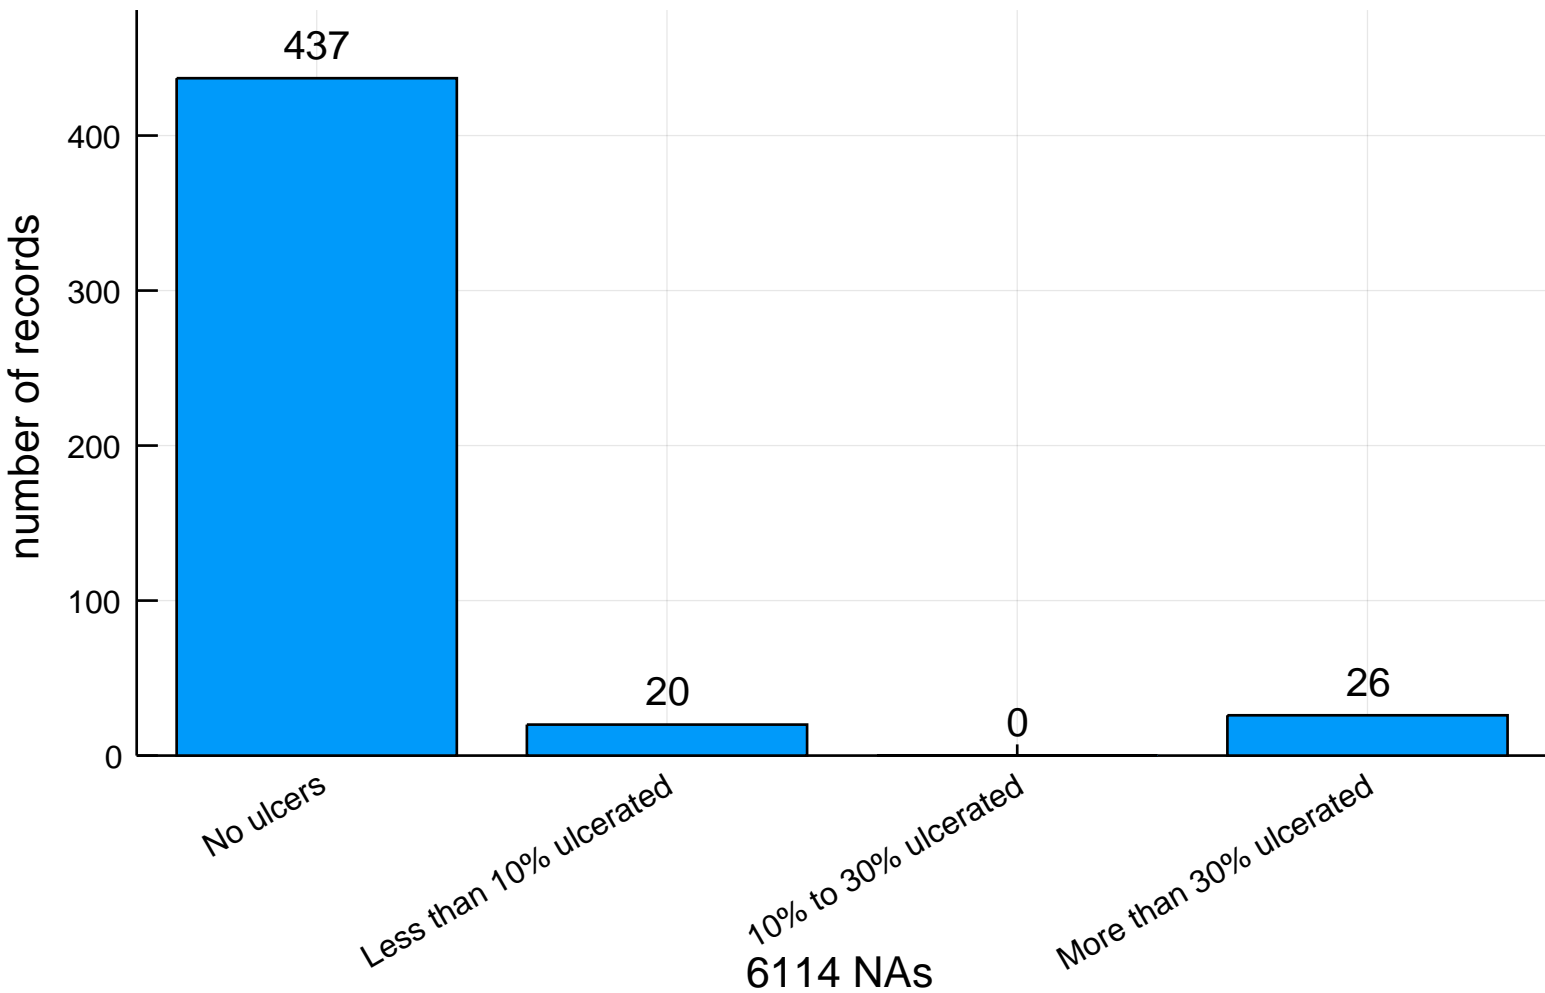

# Rectum 2 (per row)

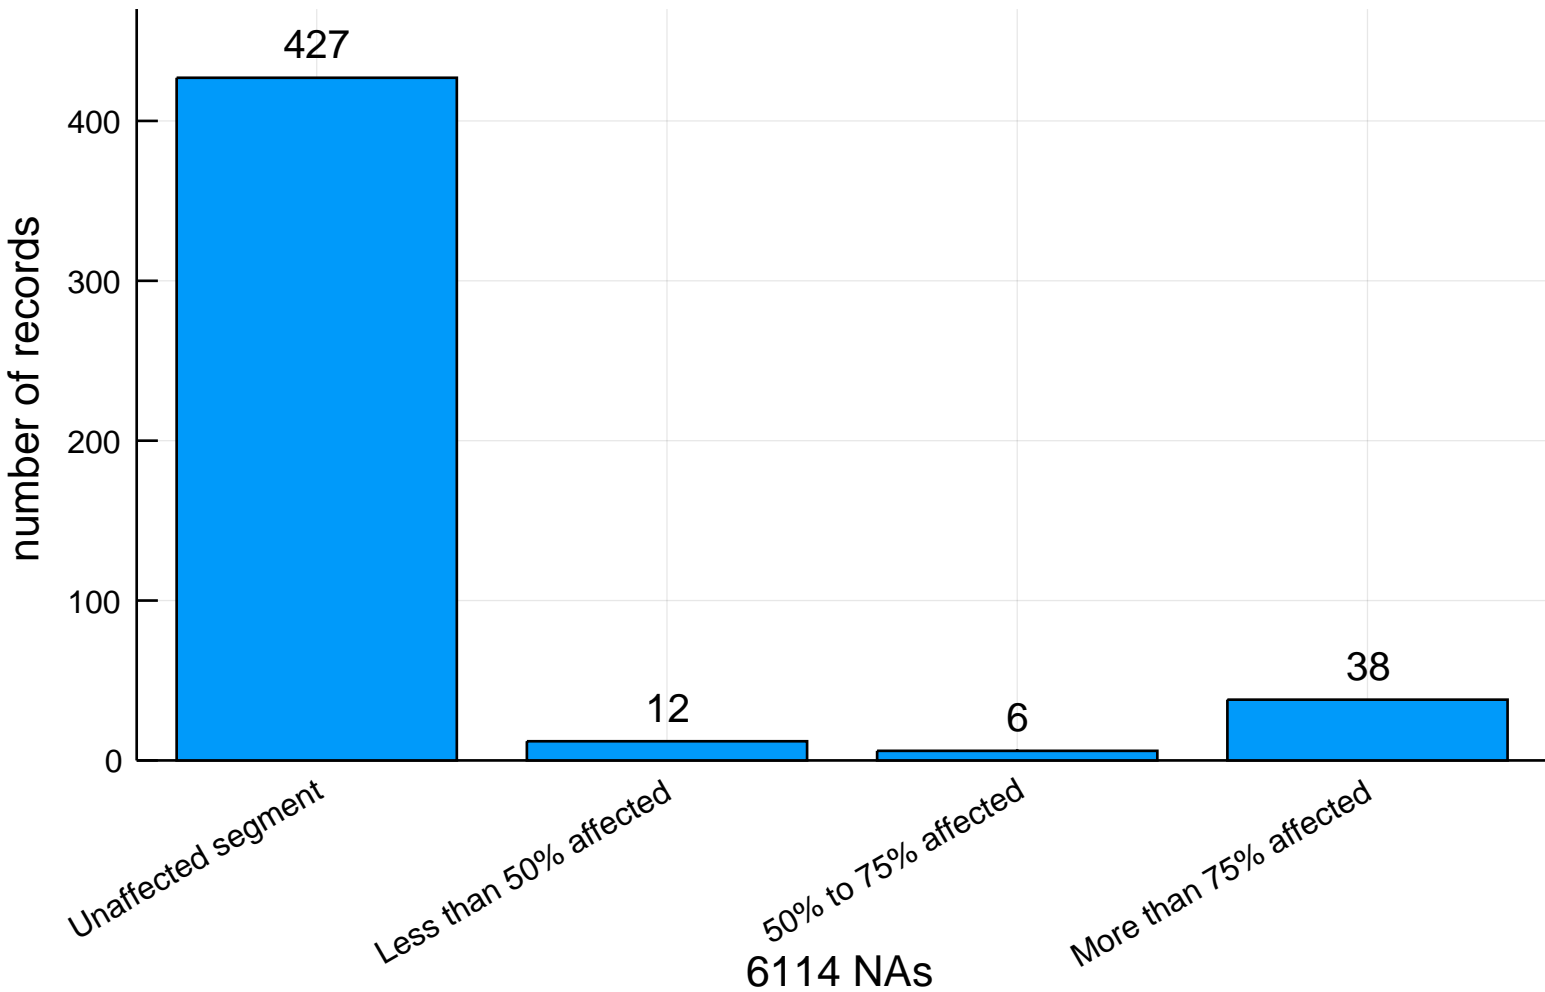

# Rectum 3 (per Participant\_ID)

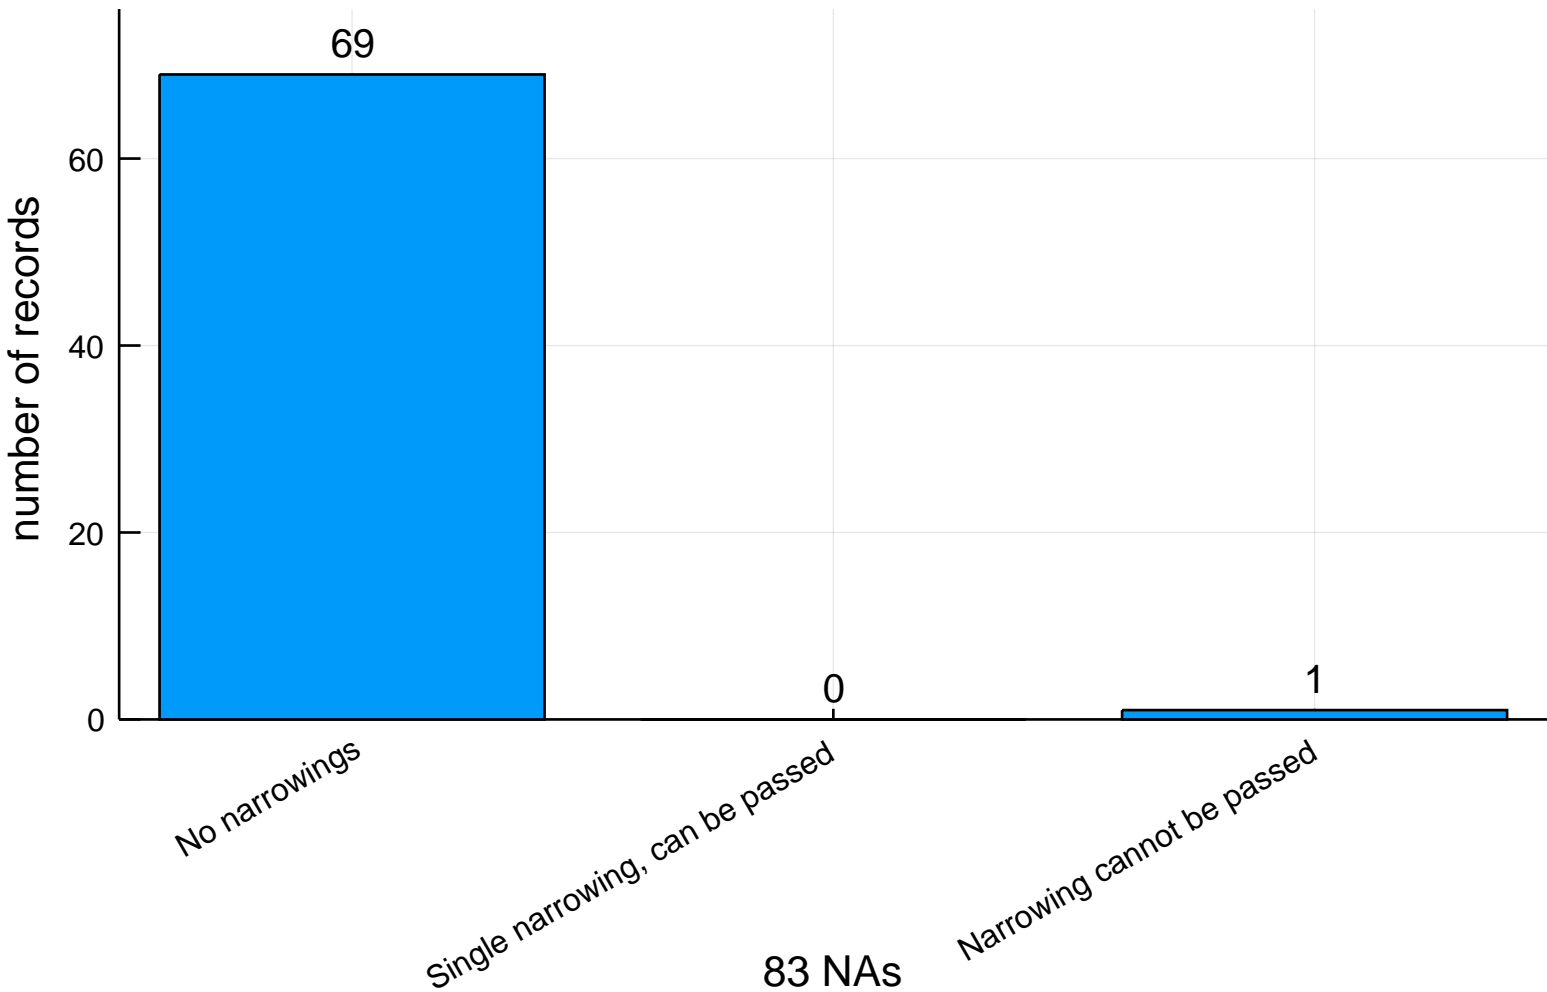

# Rectum cell biopsy (per Participant\_ID)

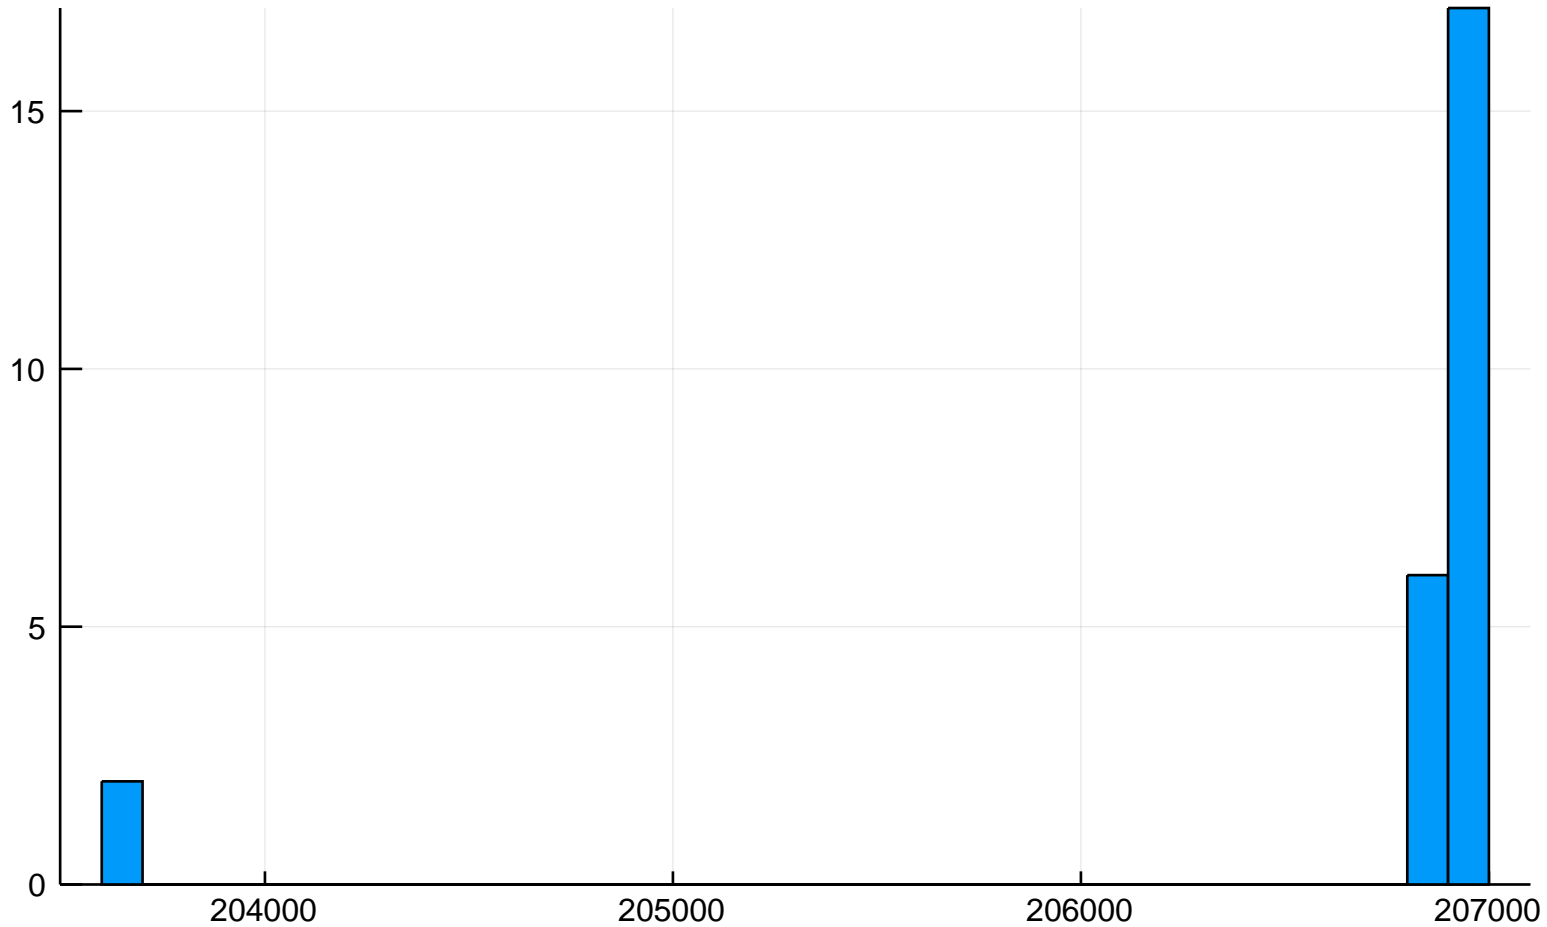

Mean: 206672.04, stdev: 908.05

# Rectum Flora (per site\_sub\_coll)

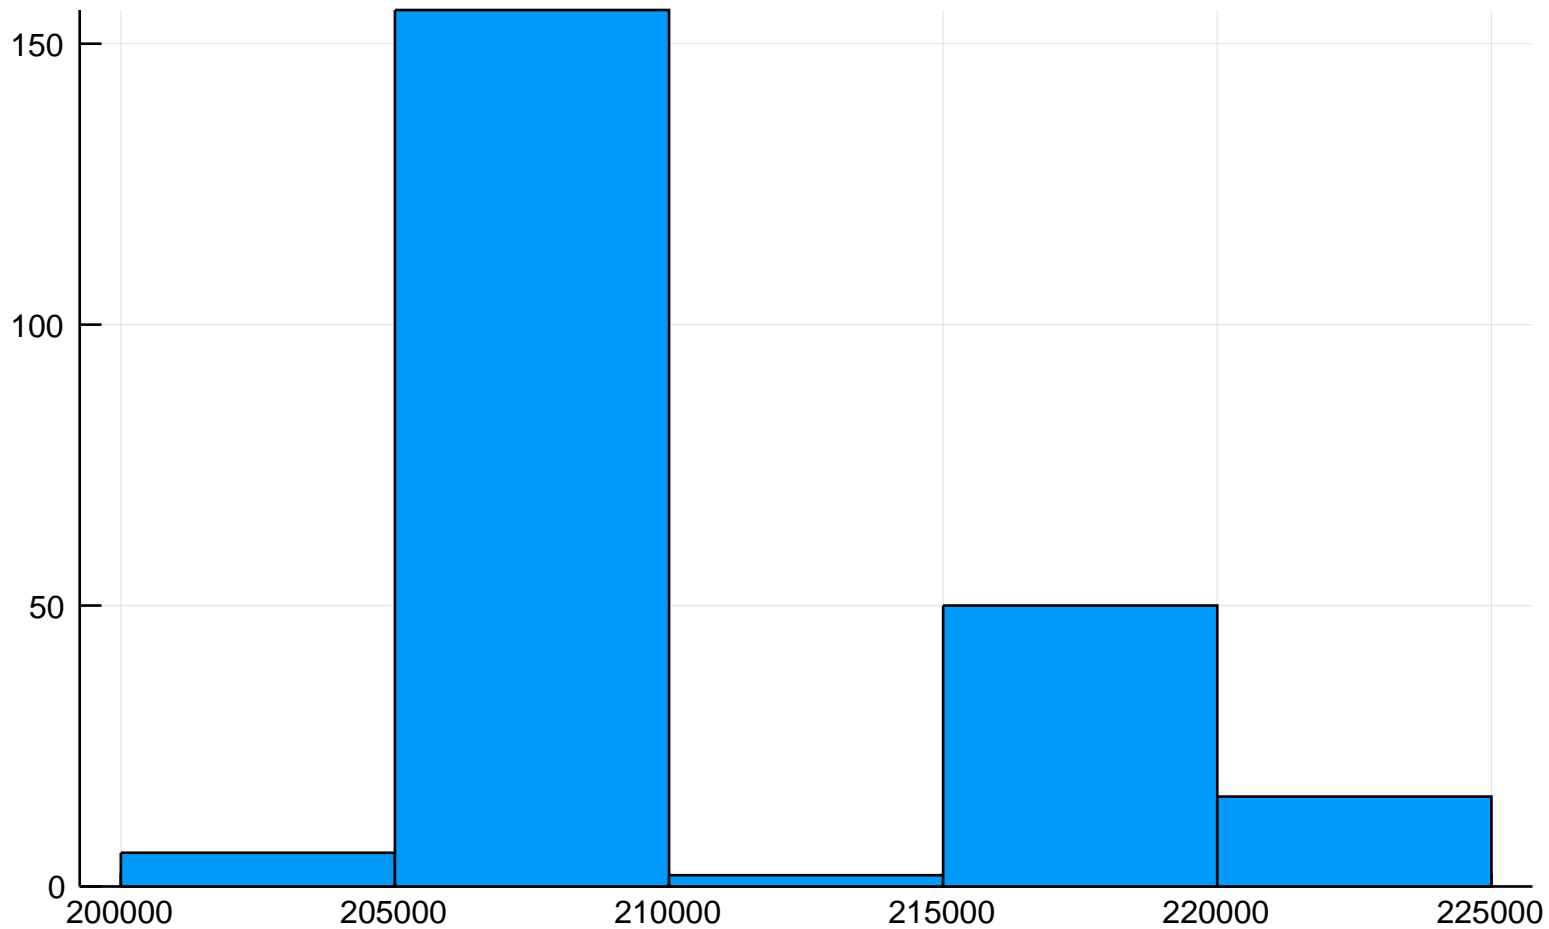

Mean: 210132.16, stdev: 6061.34

# Red meat beef hamburger pork lamb (per row)

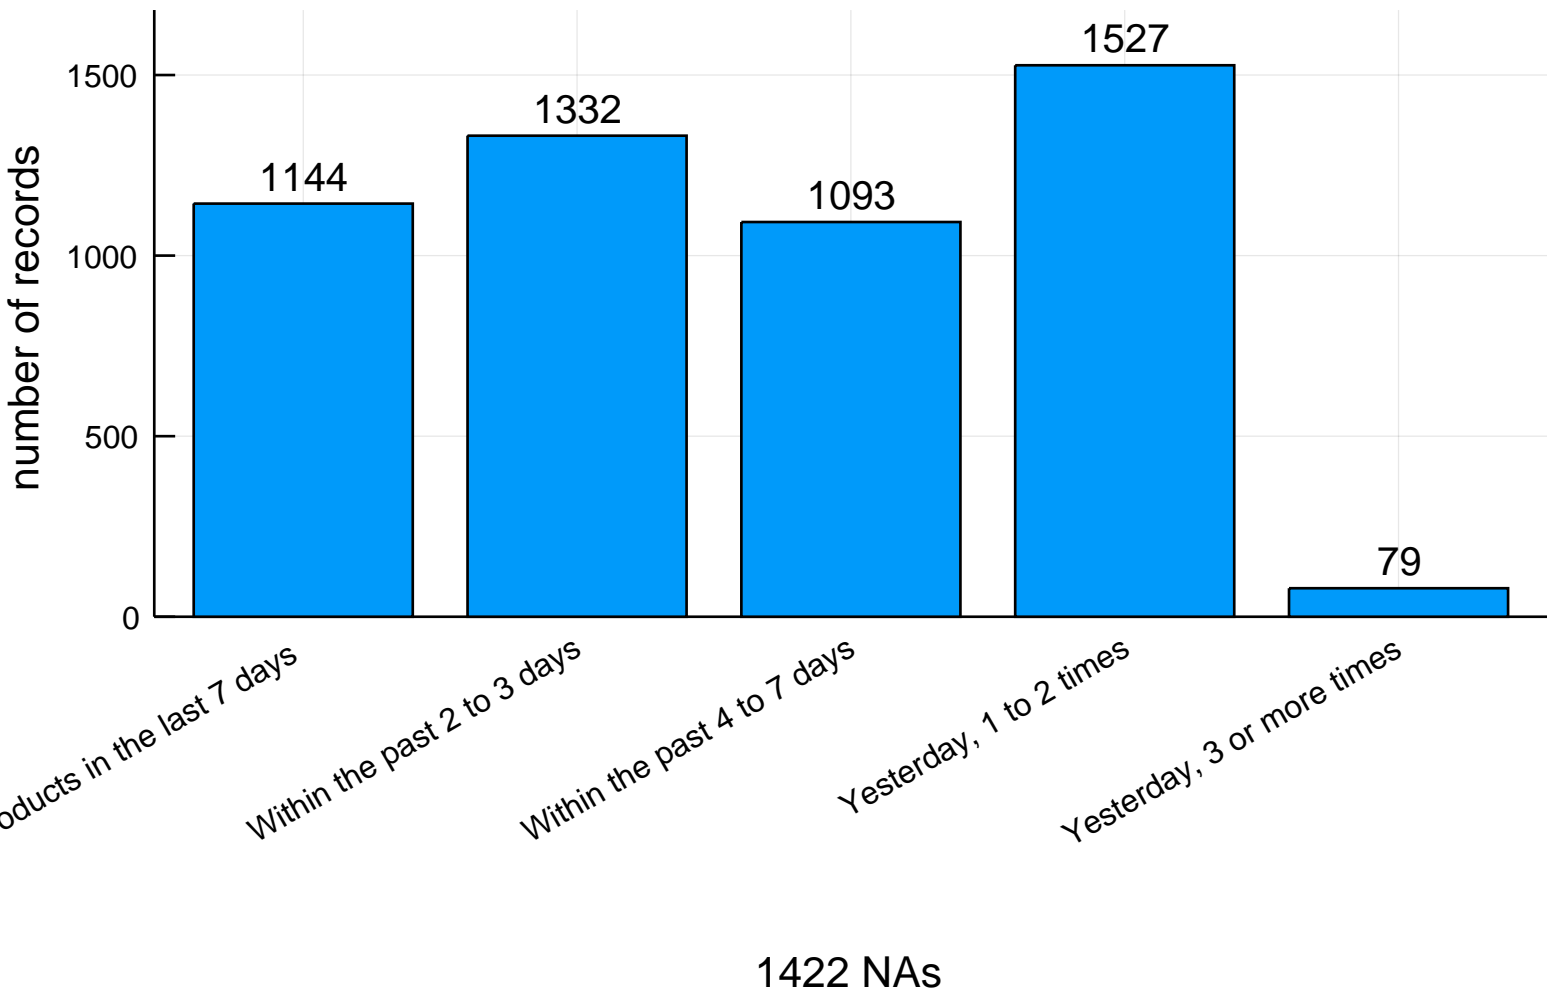

# Remicade Infliximab (per site\_sub\_coll)

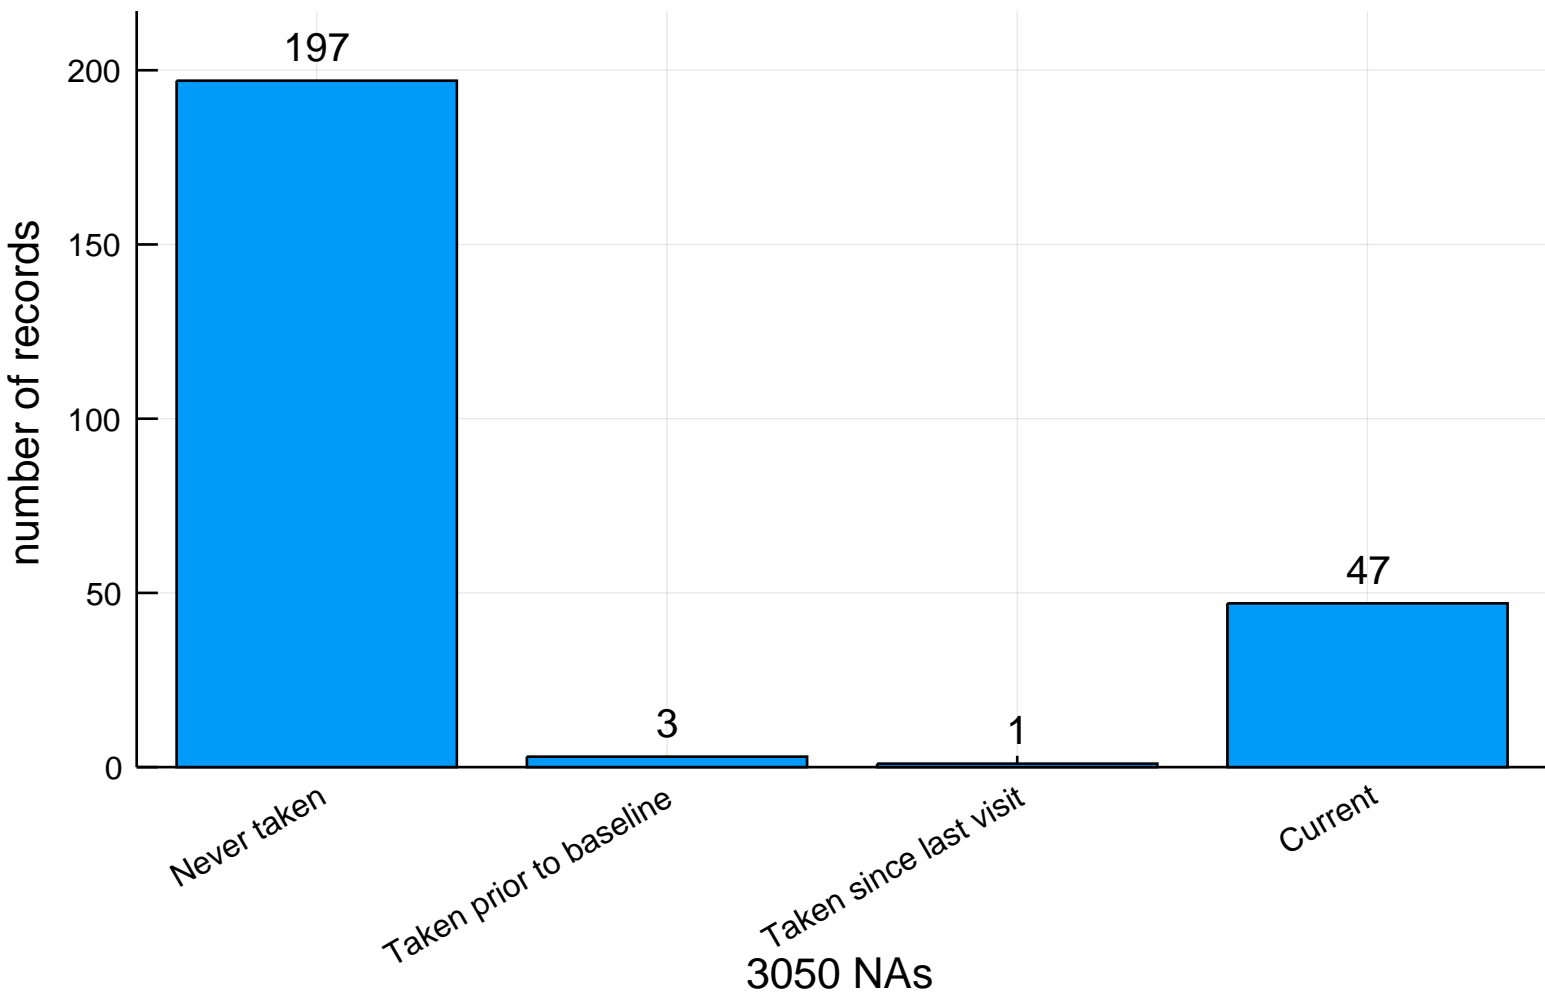

# Rheumatoid arthritis (per site\_sub\_coll)

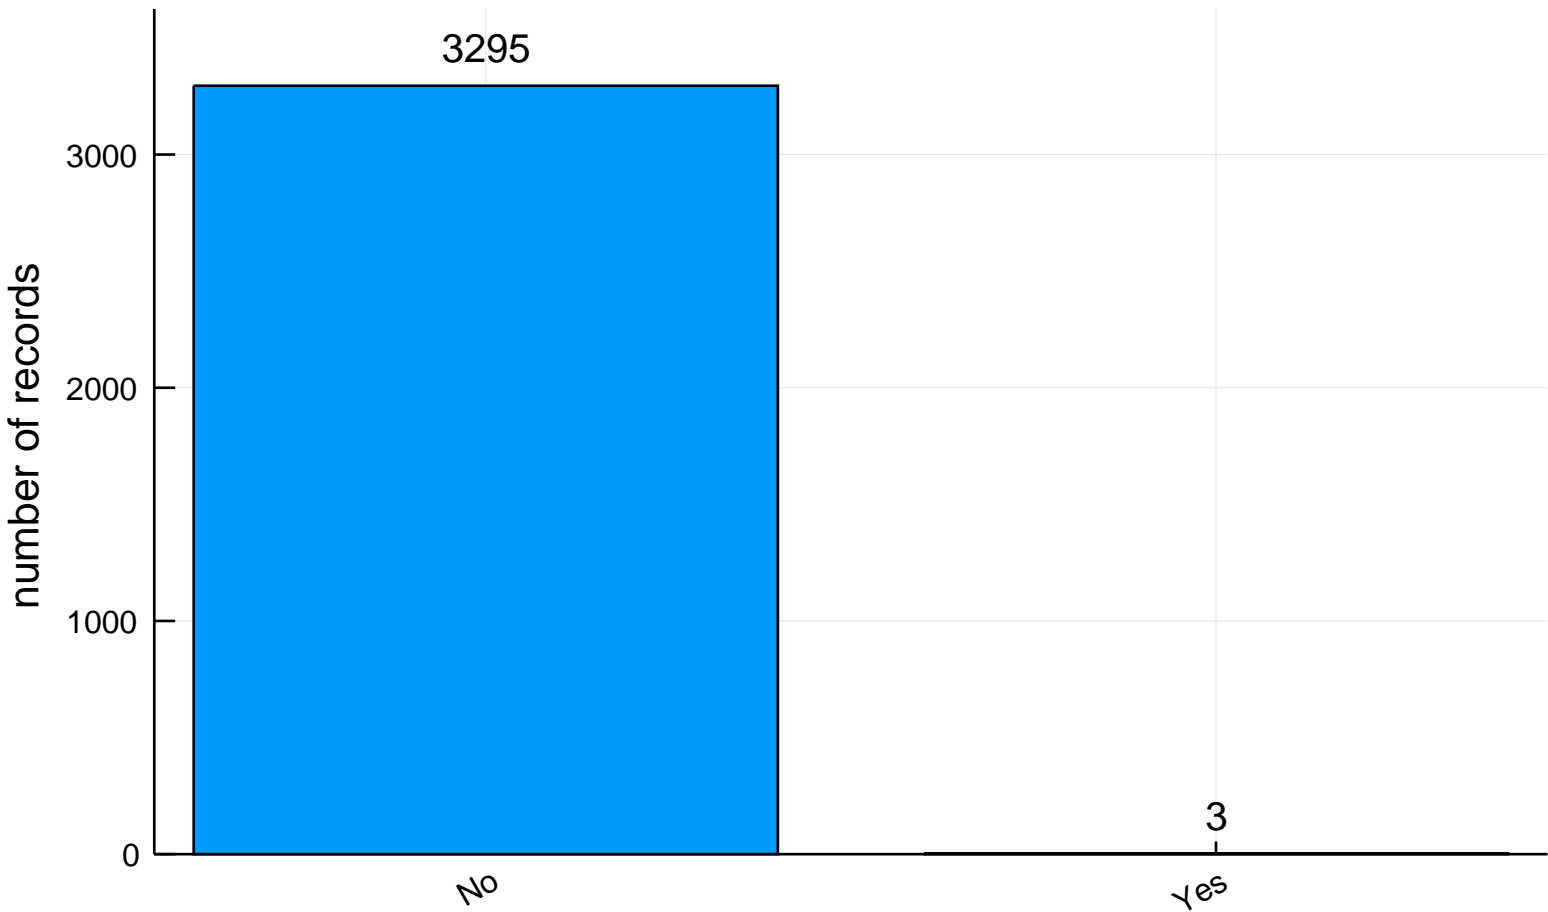

0 NAs



# Right Colon (per site\_sub\_coll)

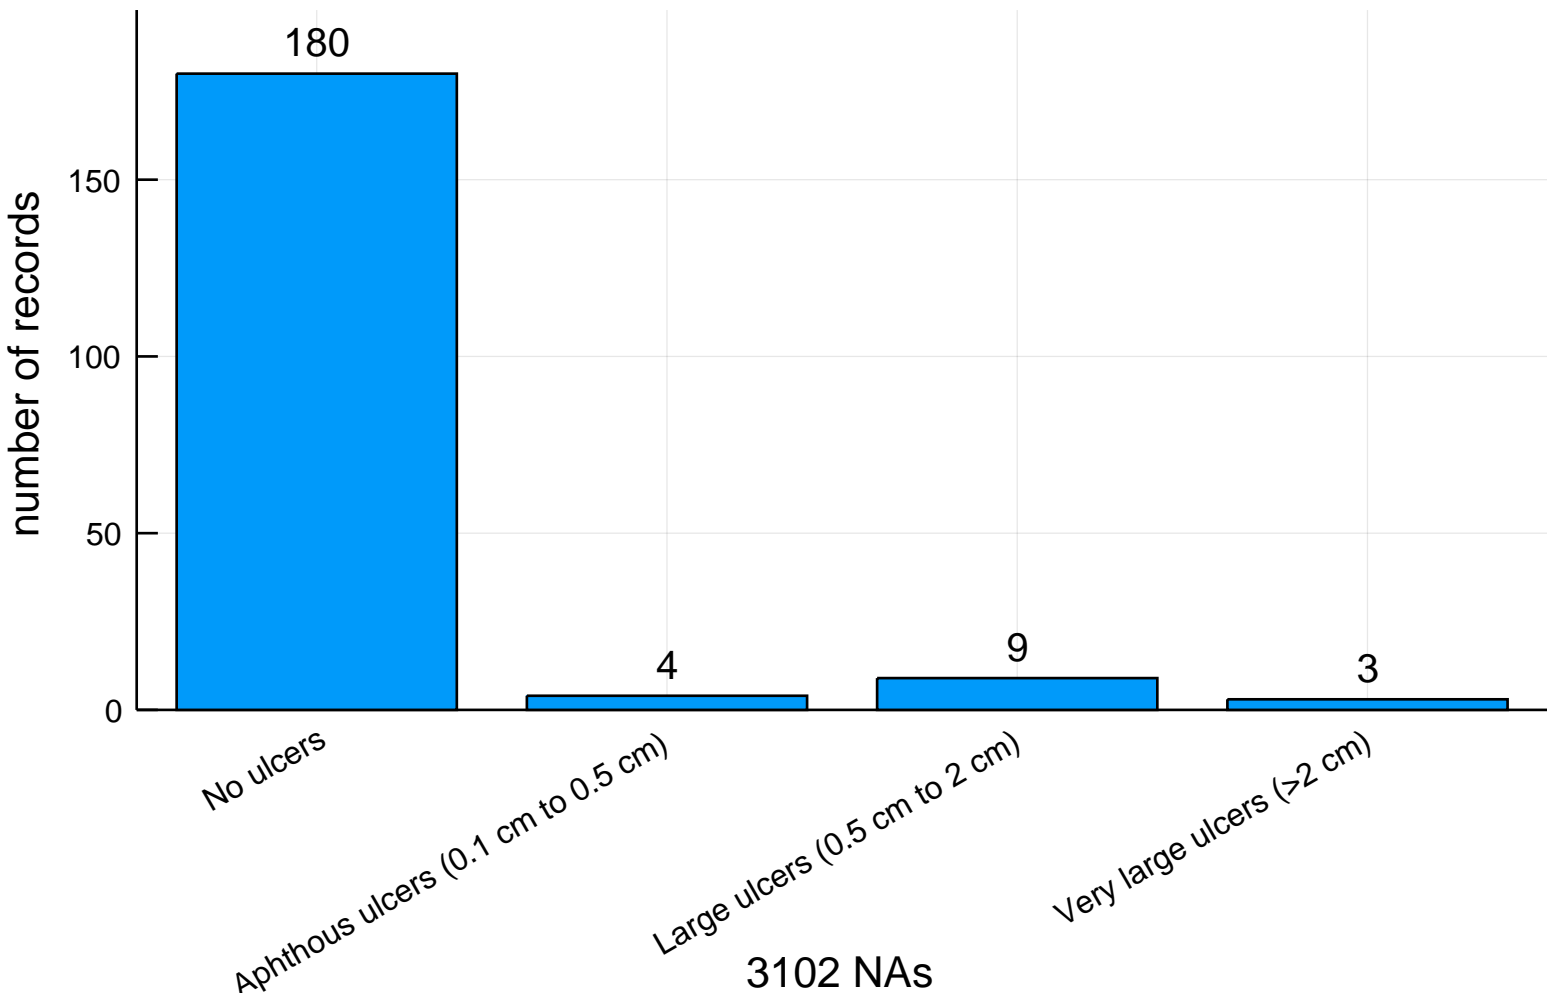

# Right Colon 1 (per site\_sub\_coll)

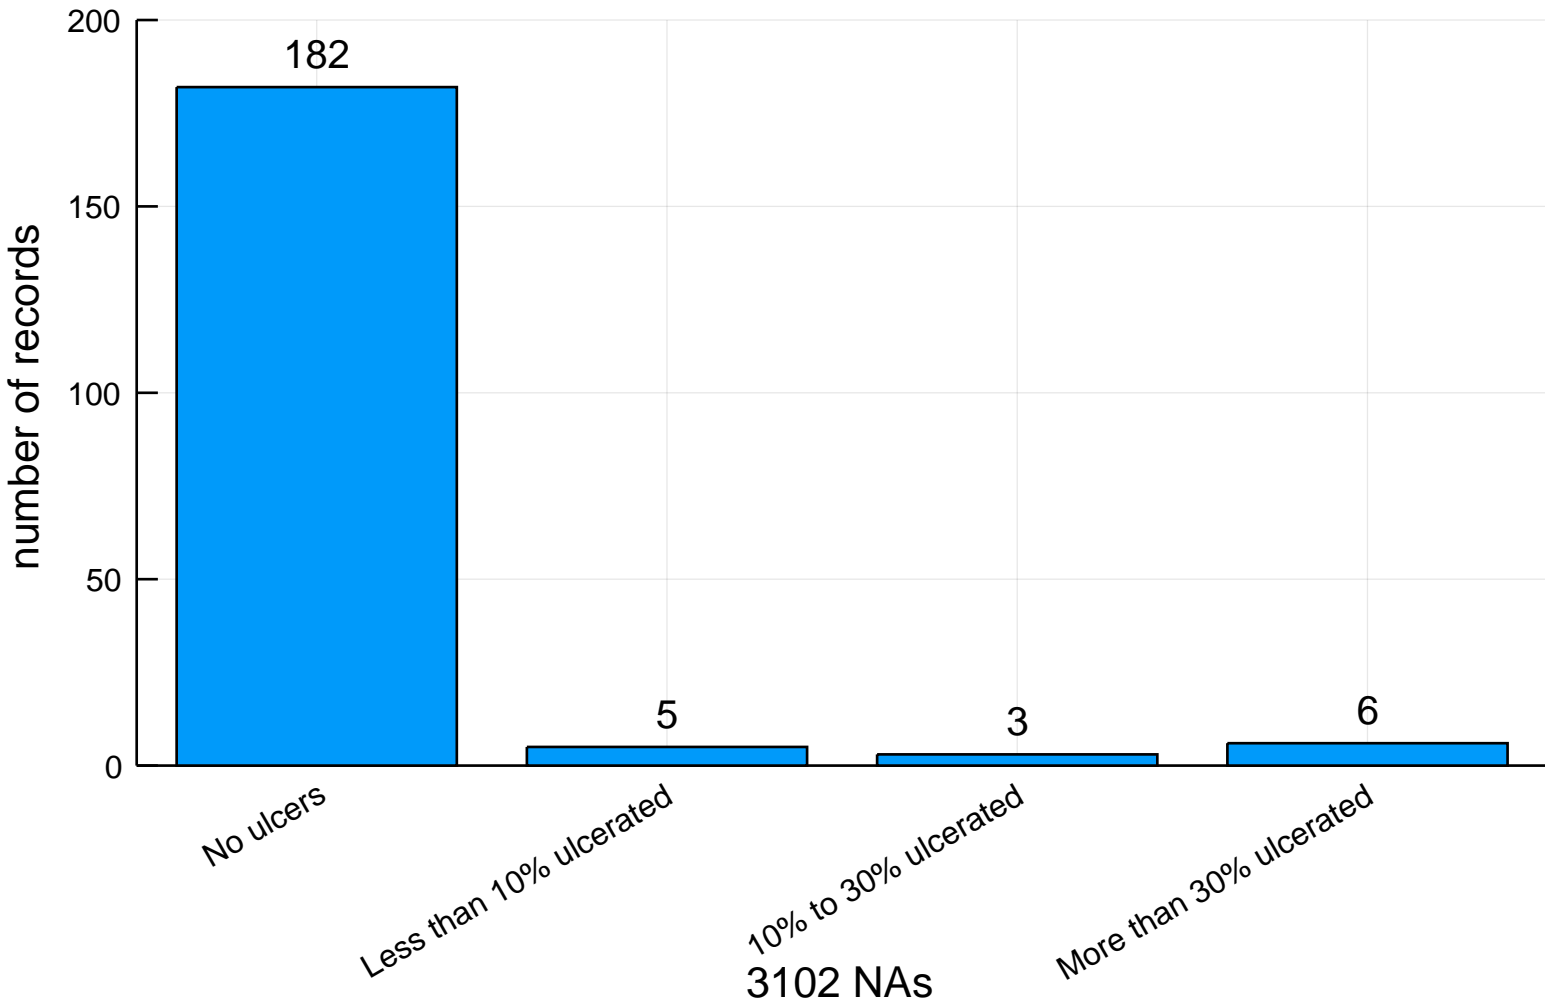

# Right Colon 2 (per site\_sub\_coll)

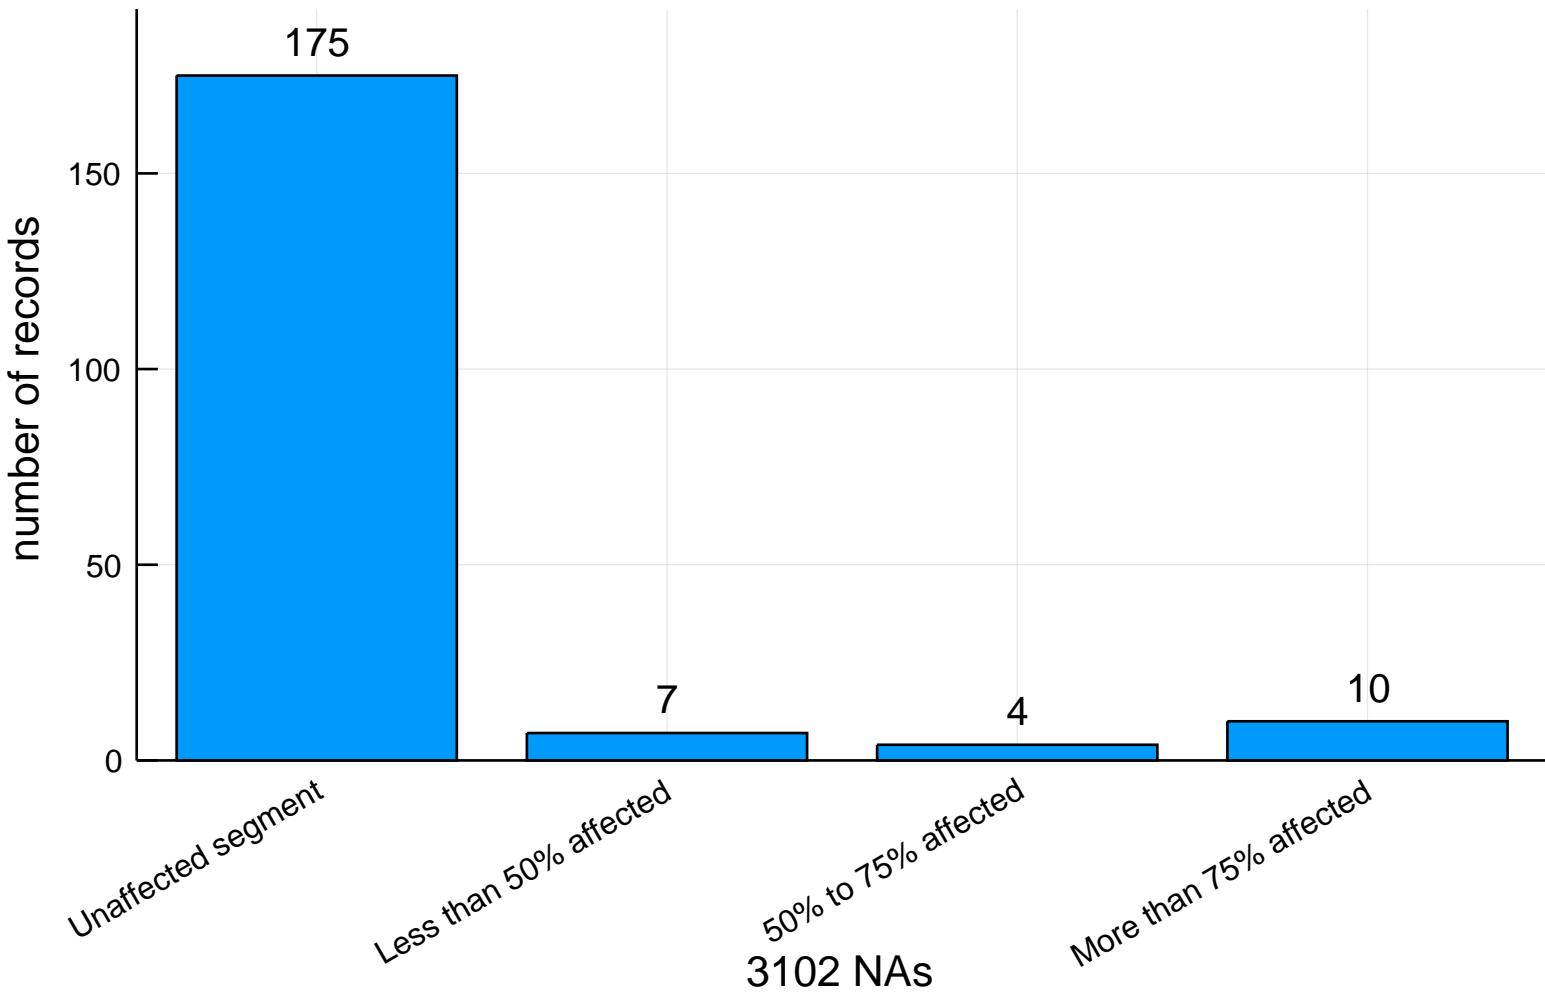

# Rowasa enemas mesalamine enemas (per site\_sub\_coll)

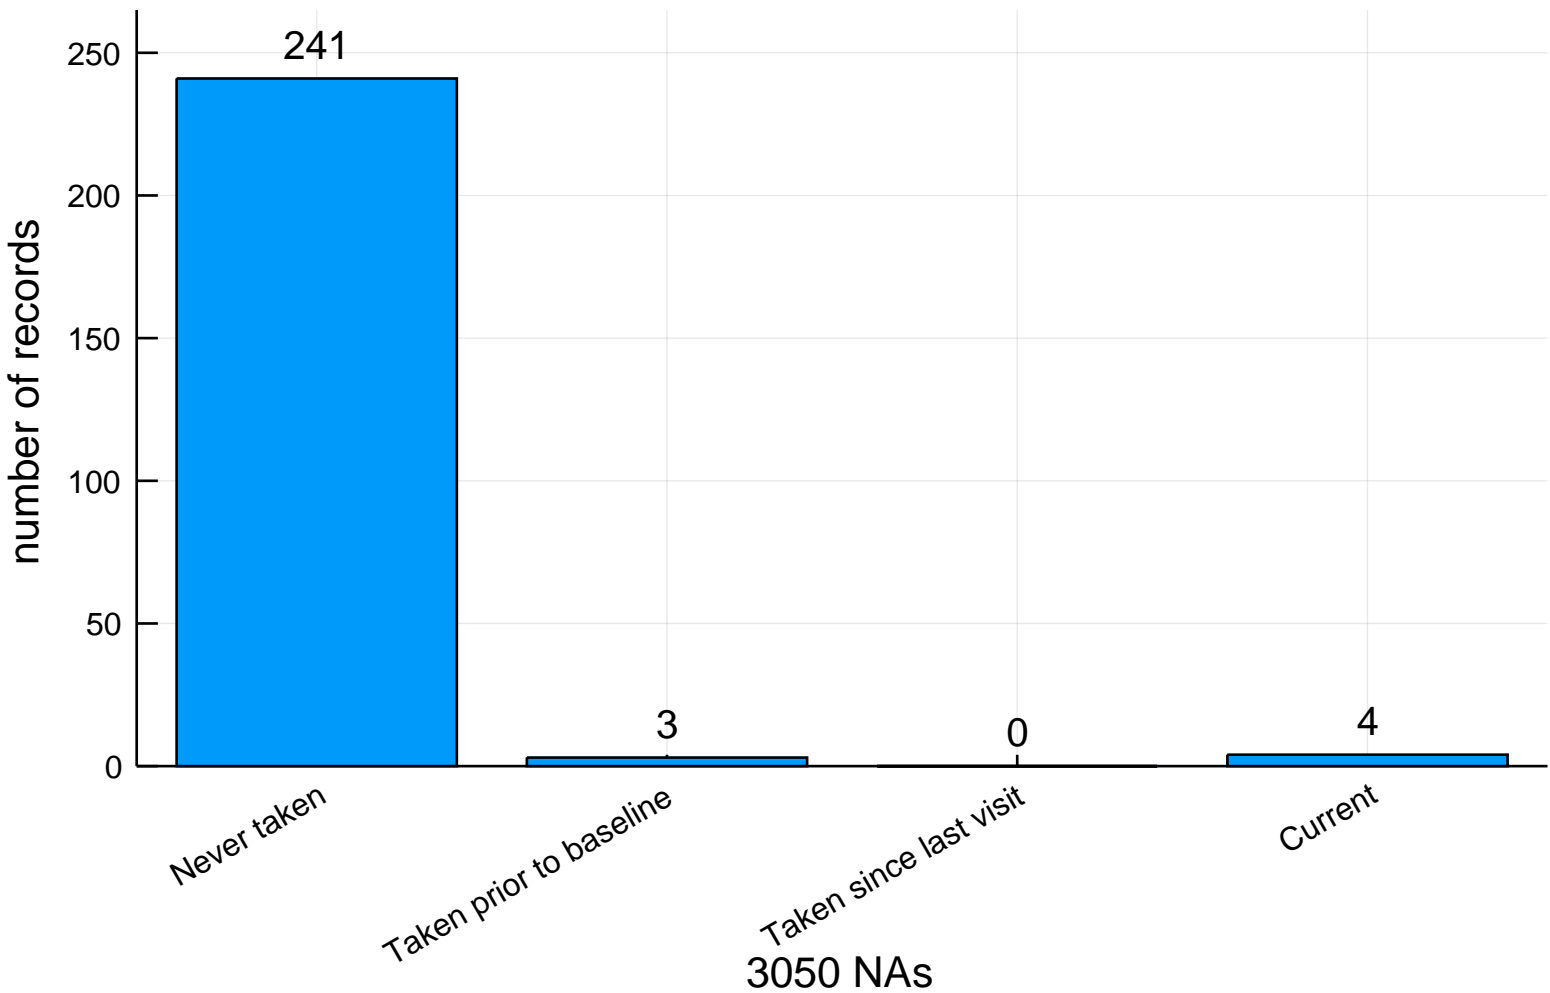

# sccai (per site\_sub\_coll)

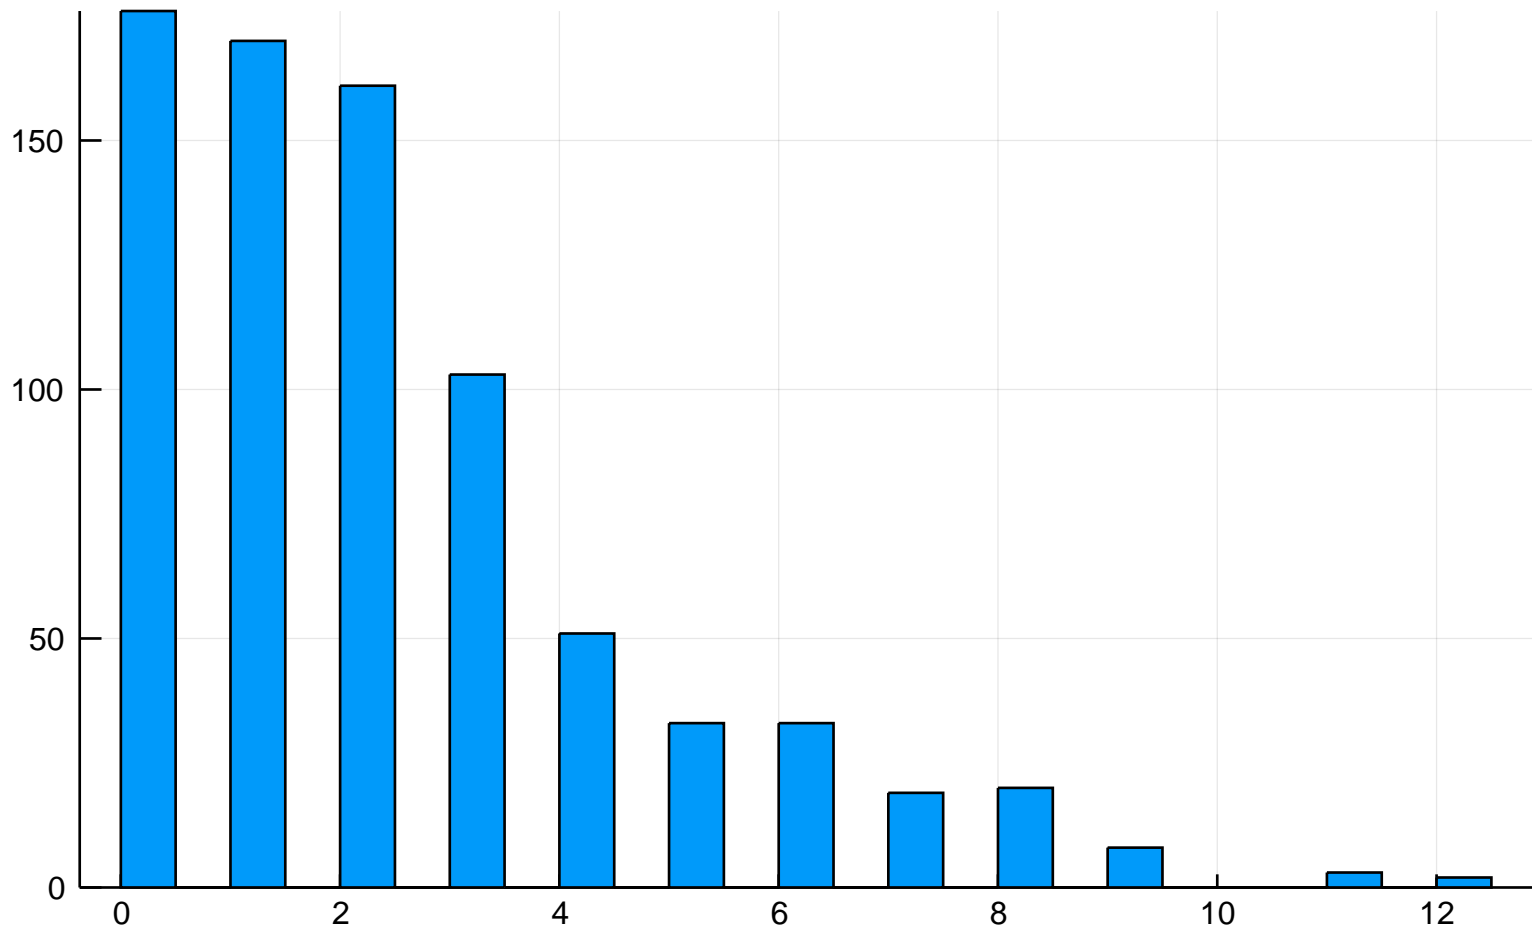

Mean: 2.3, stdev: 2.26

# SES CD Score (per row)

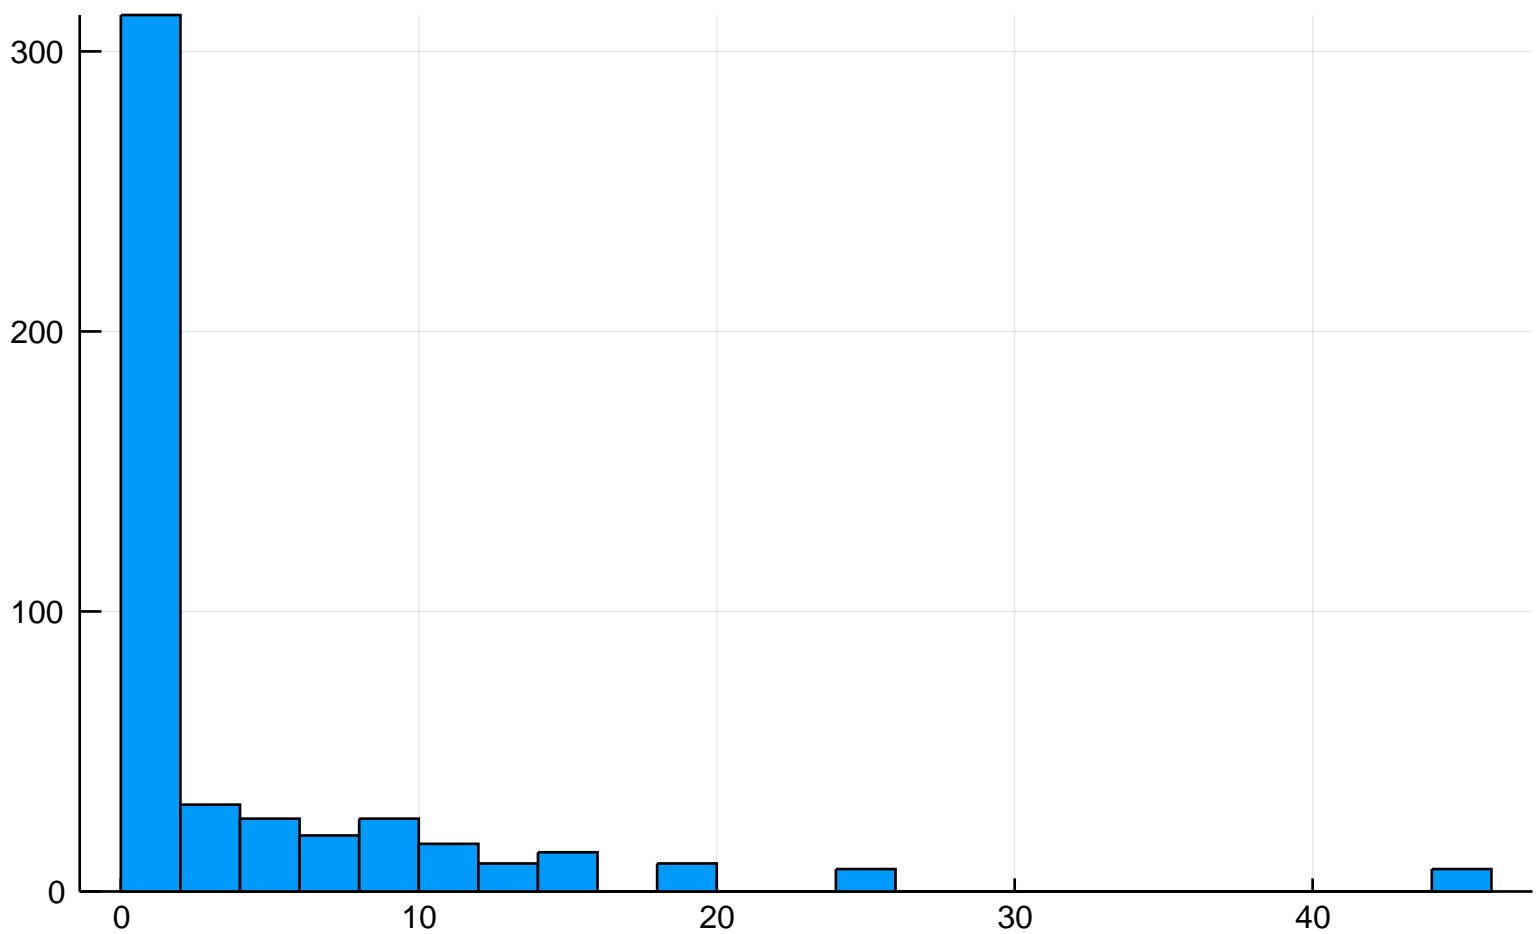

Mean: 3.72, stdev: 7.48

# sex (per Participant\_ID)

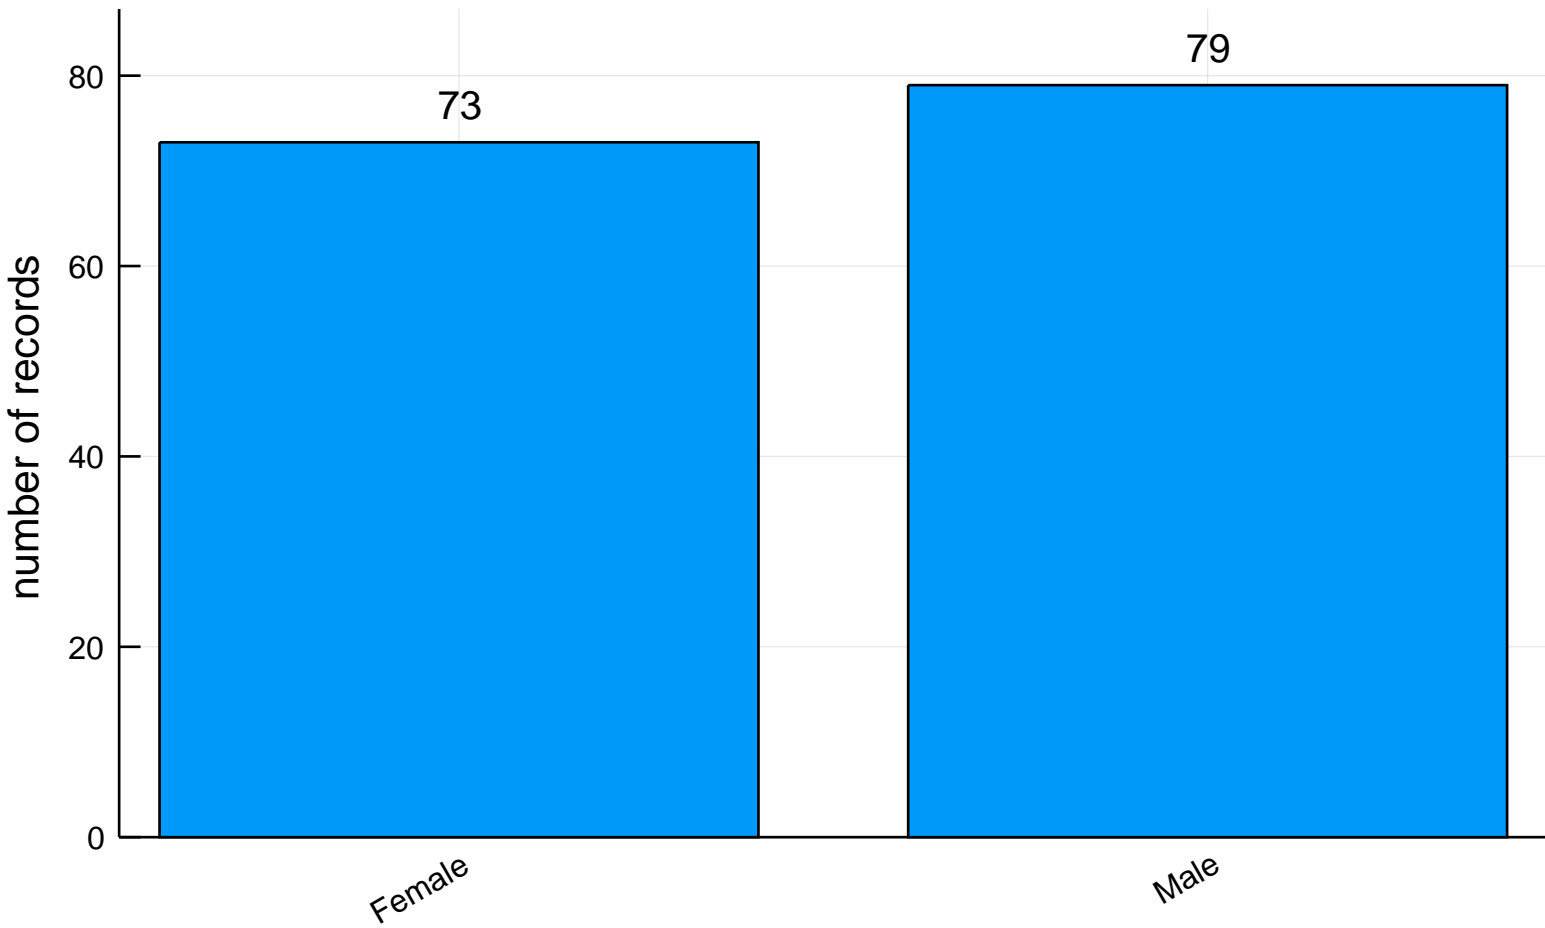

1 NAs

# Shellfish shrimp lobster scallops etc (per site\_sub\_coll)

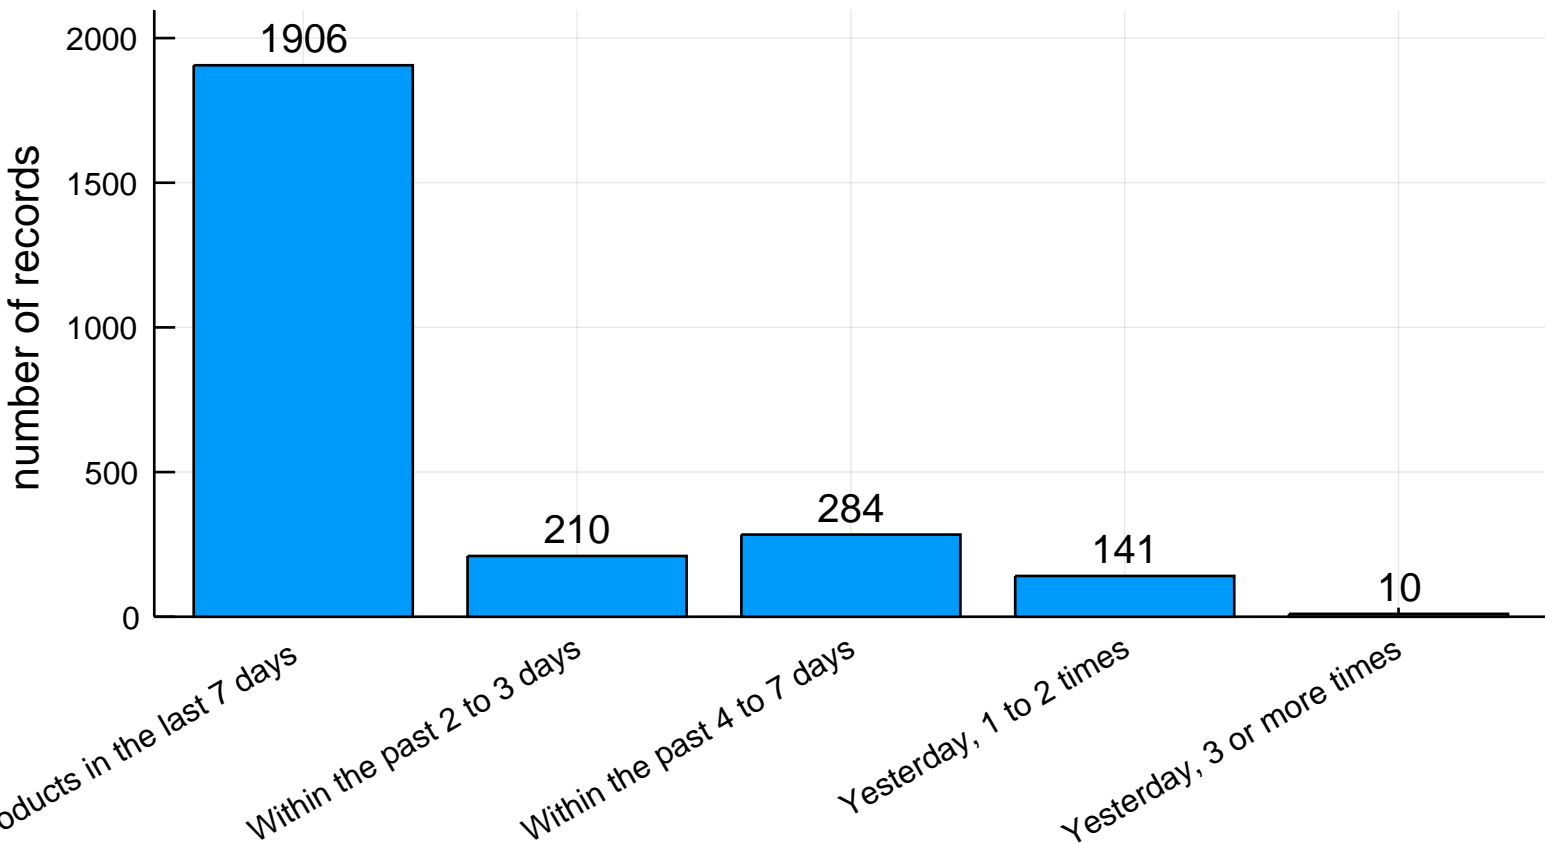

747 NAs



# SIBDQ Score (per Participant\_ID)

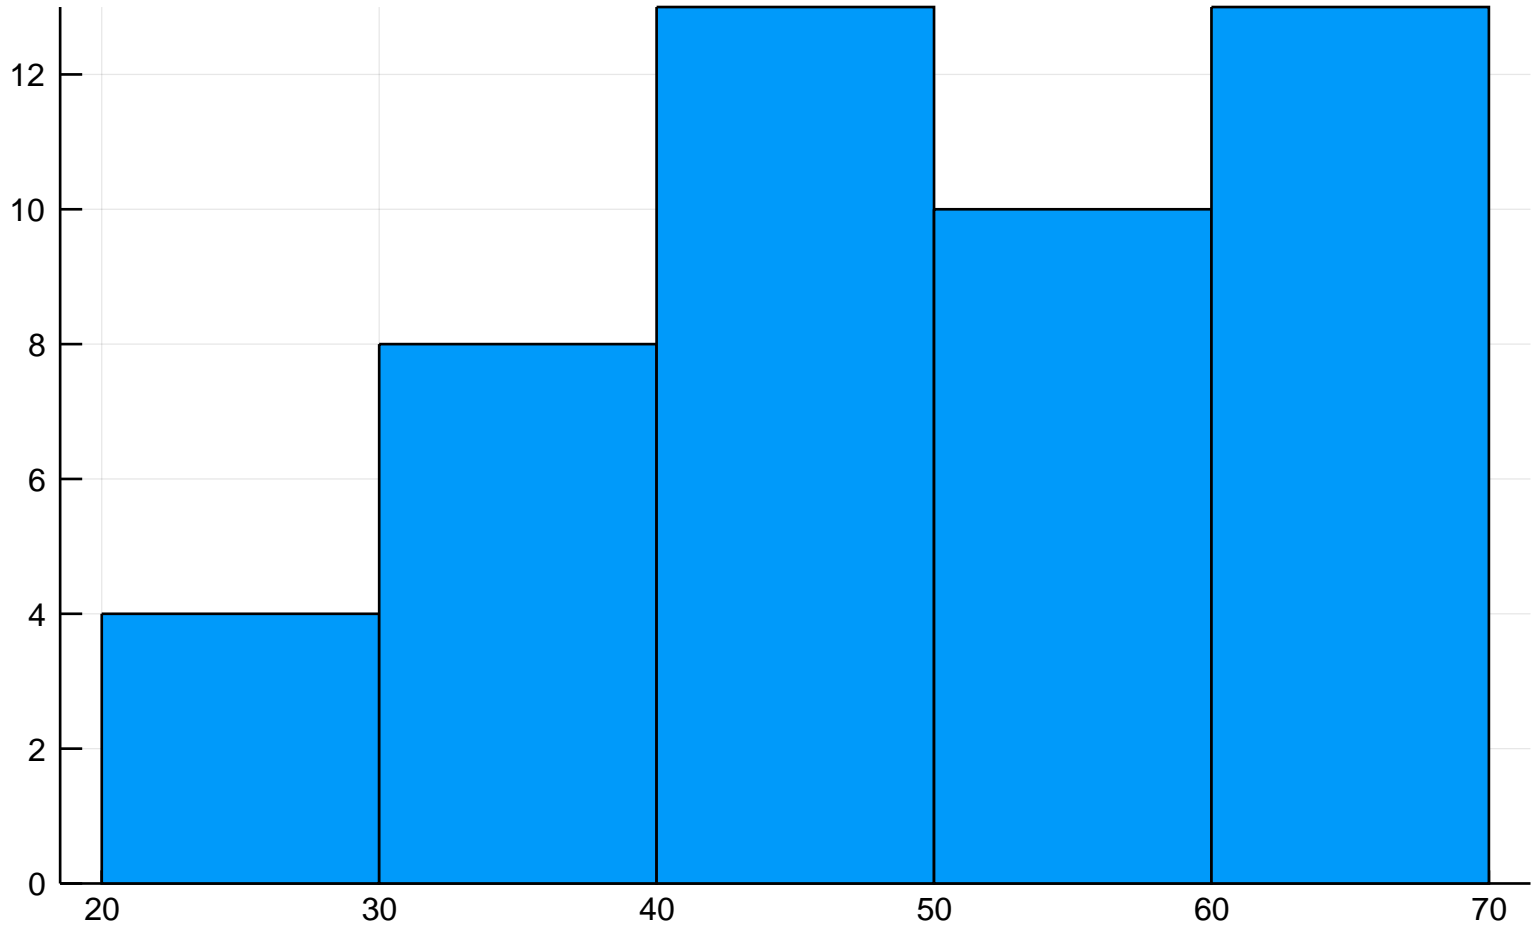

Mean: 48.92, stdev: 13.17

# Siblings (per Participant\_ID)

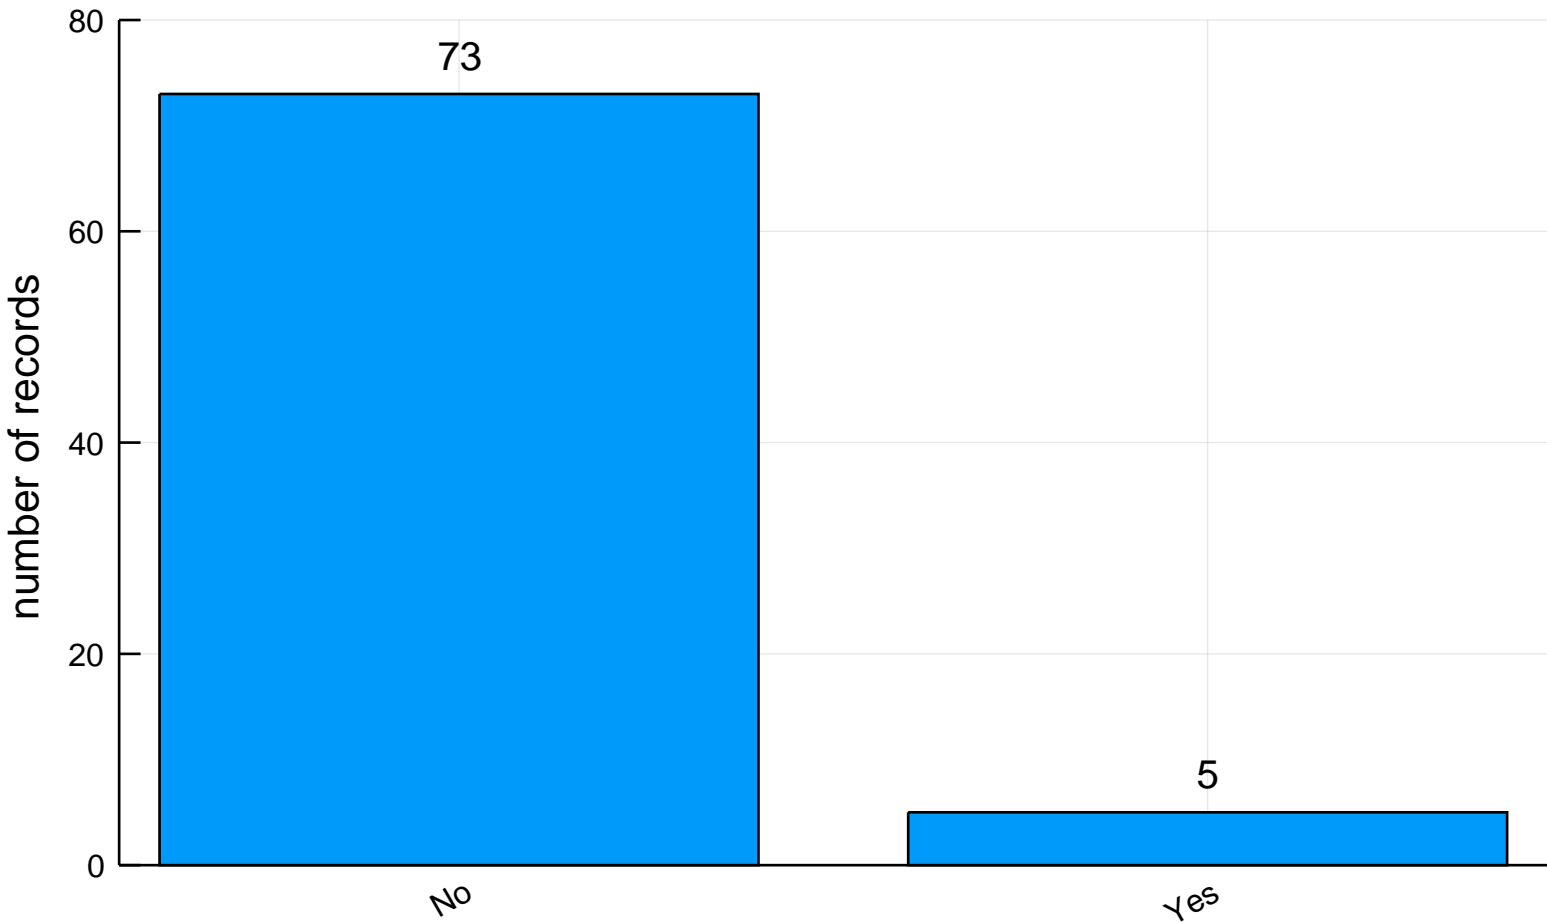

75 NAs

# site name (per Participant\_ID)

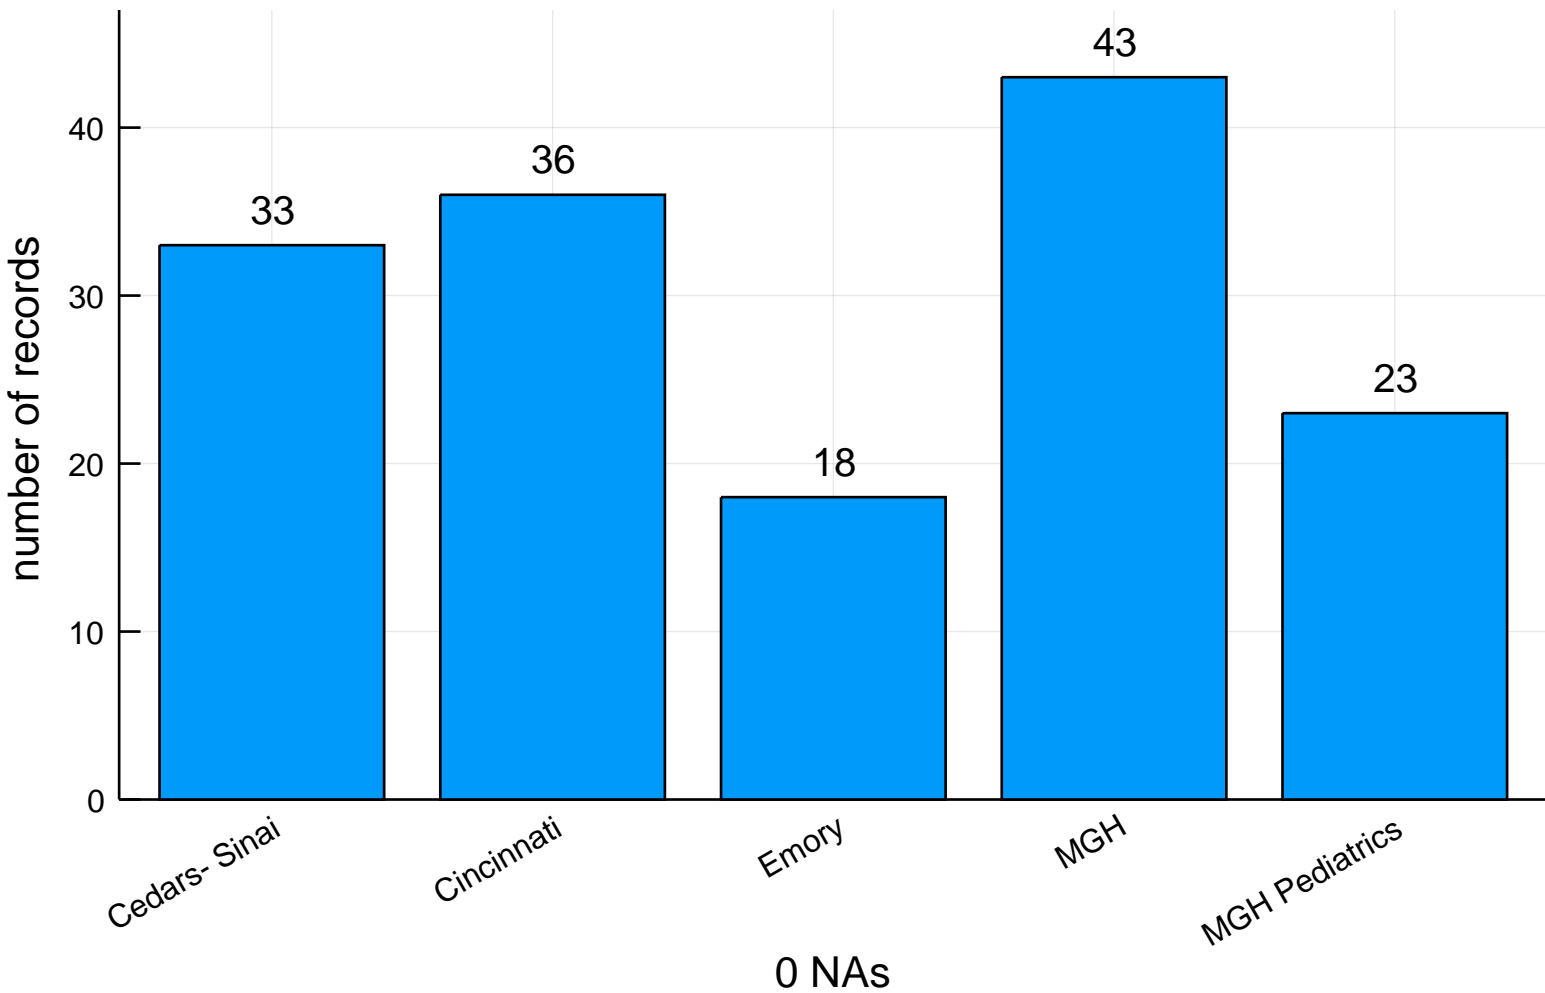

# smoking status (per Participant\_ID)

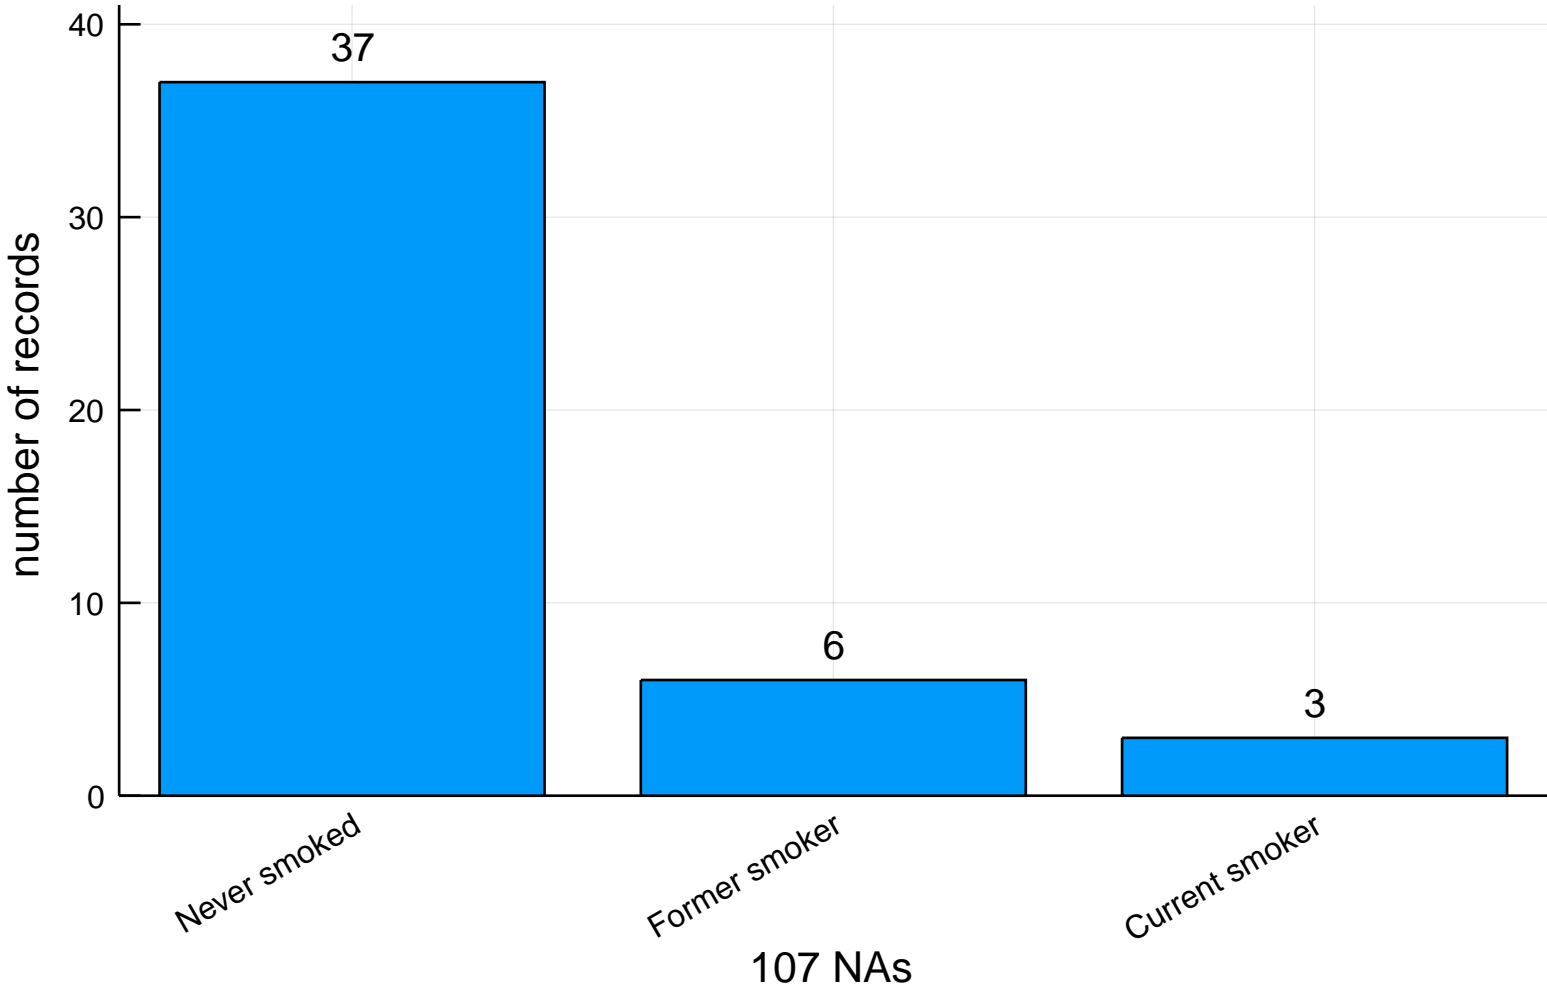

# Soft drinks tea or coffee with sugar cor (per row)

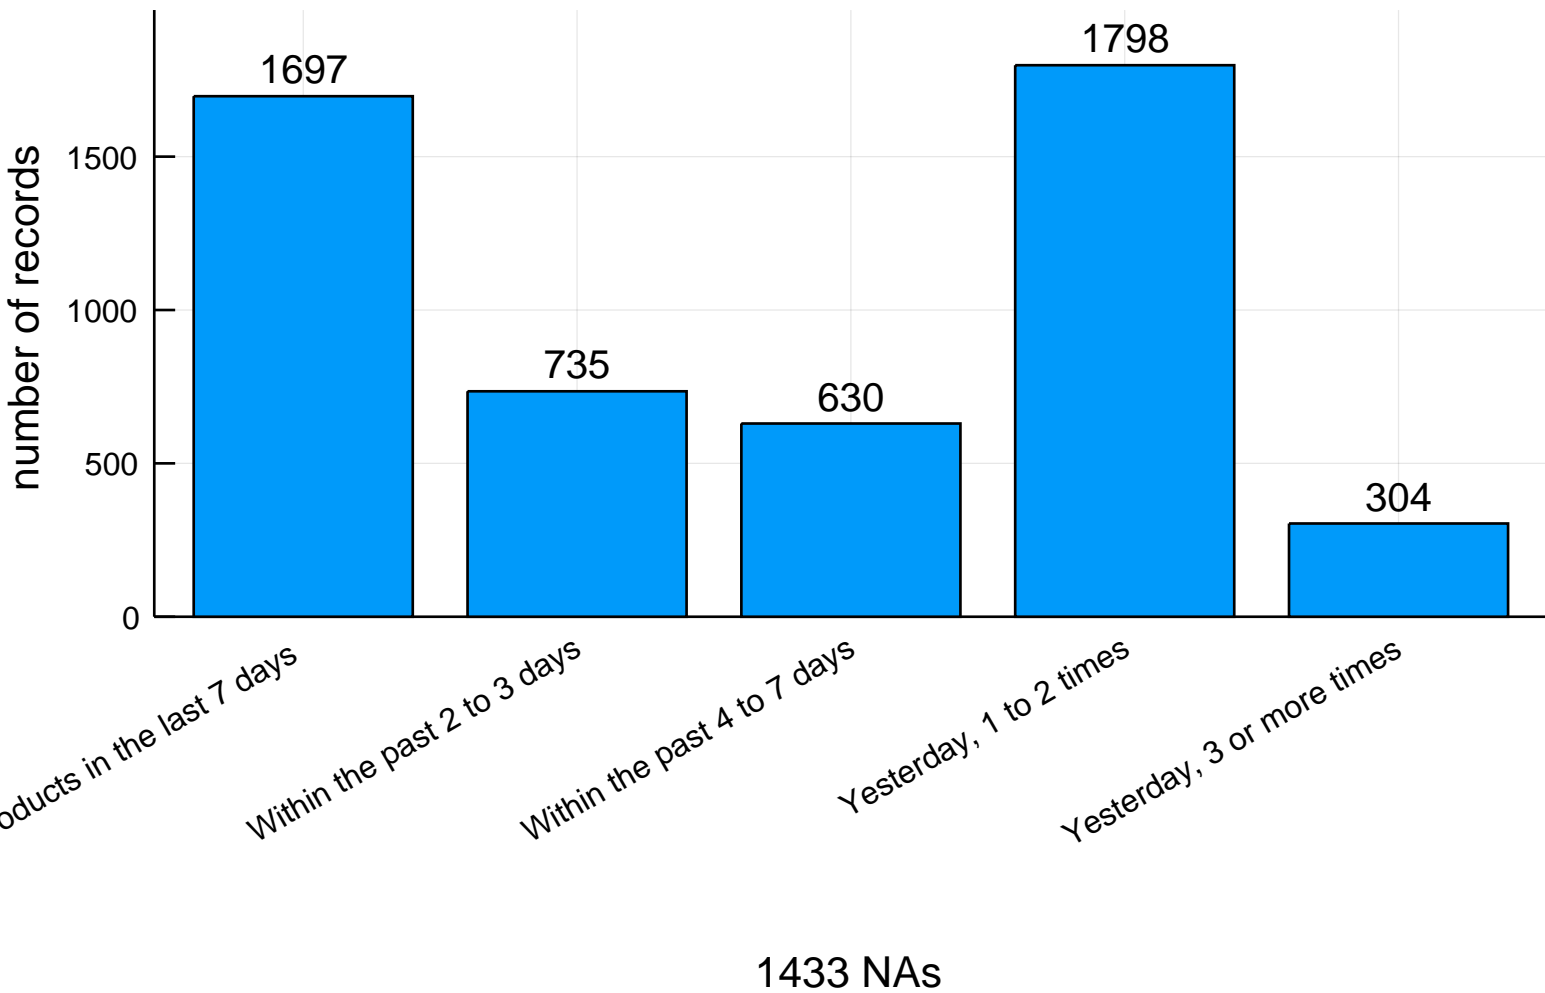

# Solumedrol Medrol (per site\_sub\_coll)

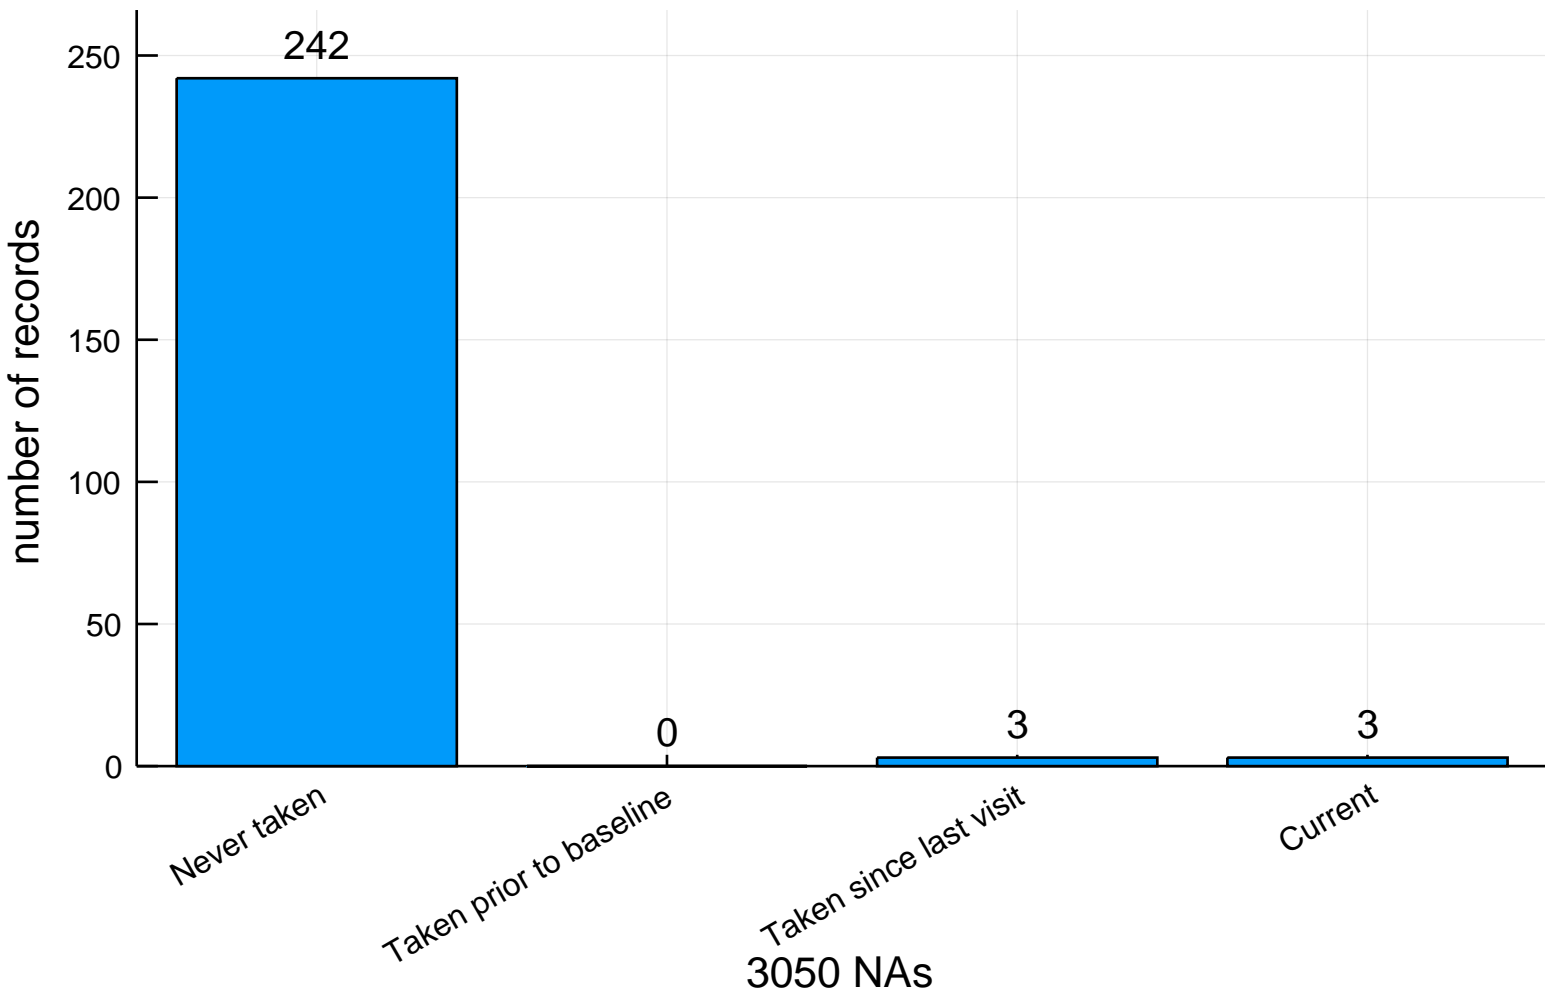

# Specify race (per Participant\_ID)

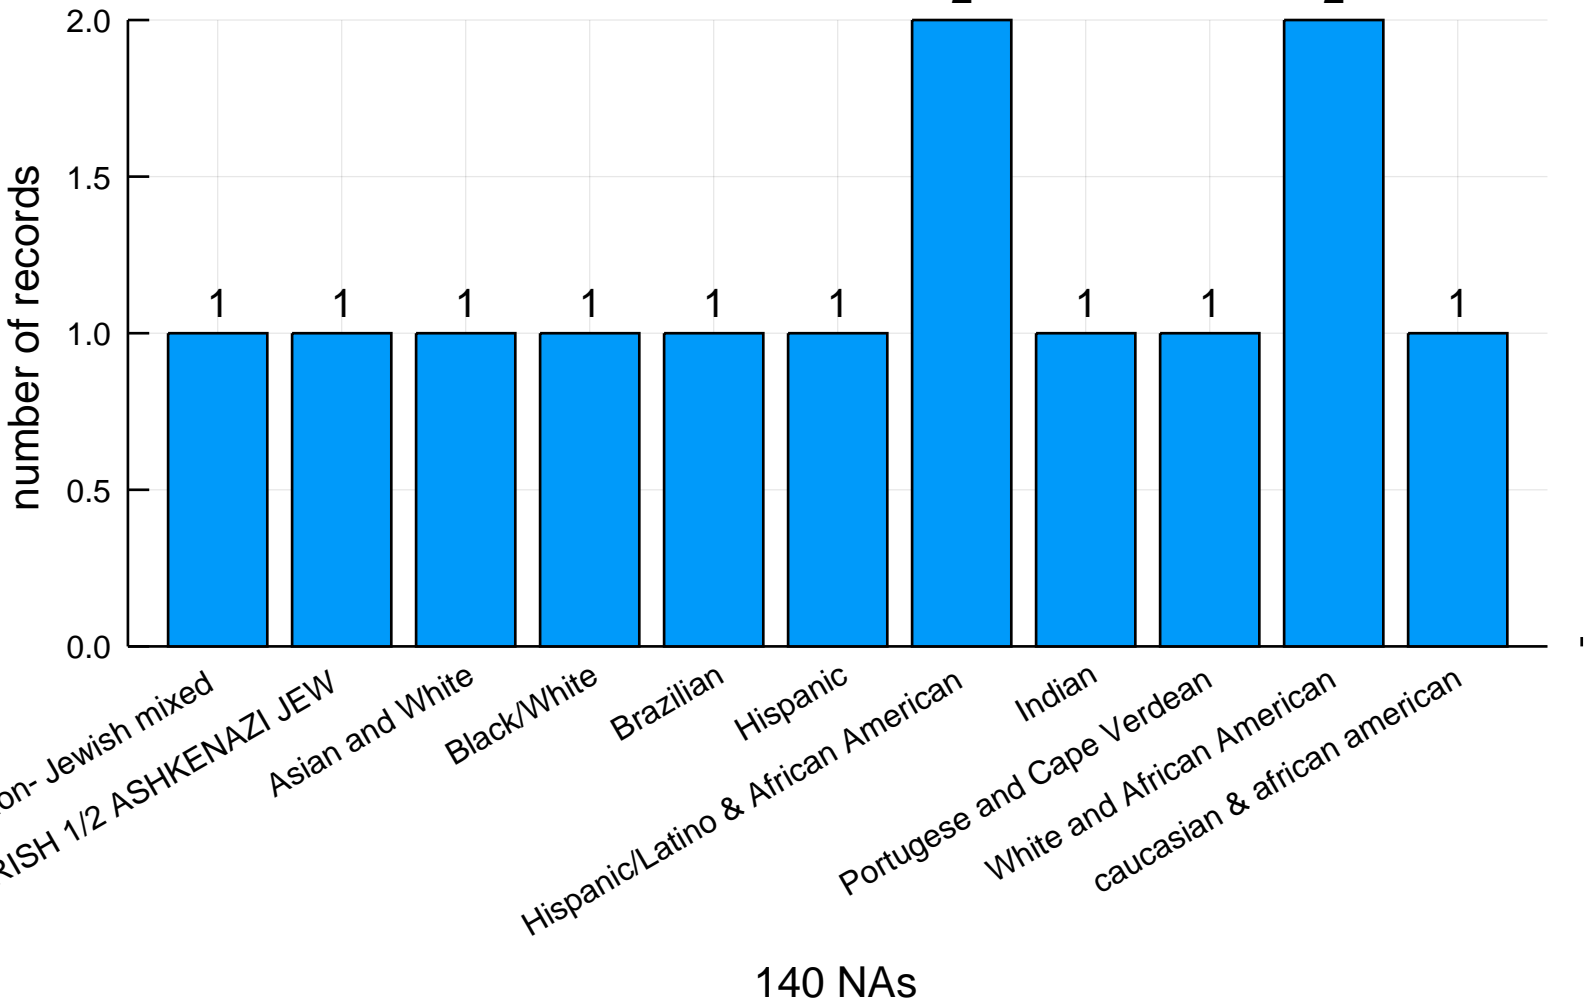

# Starch white rice bread potatoes y (per row)

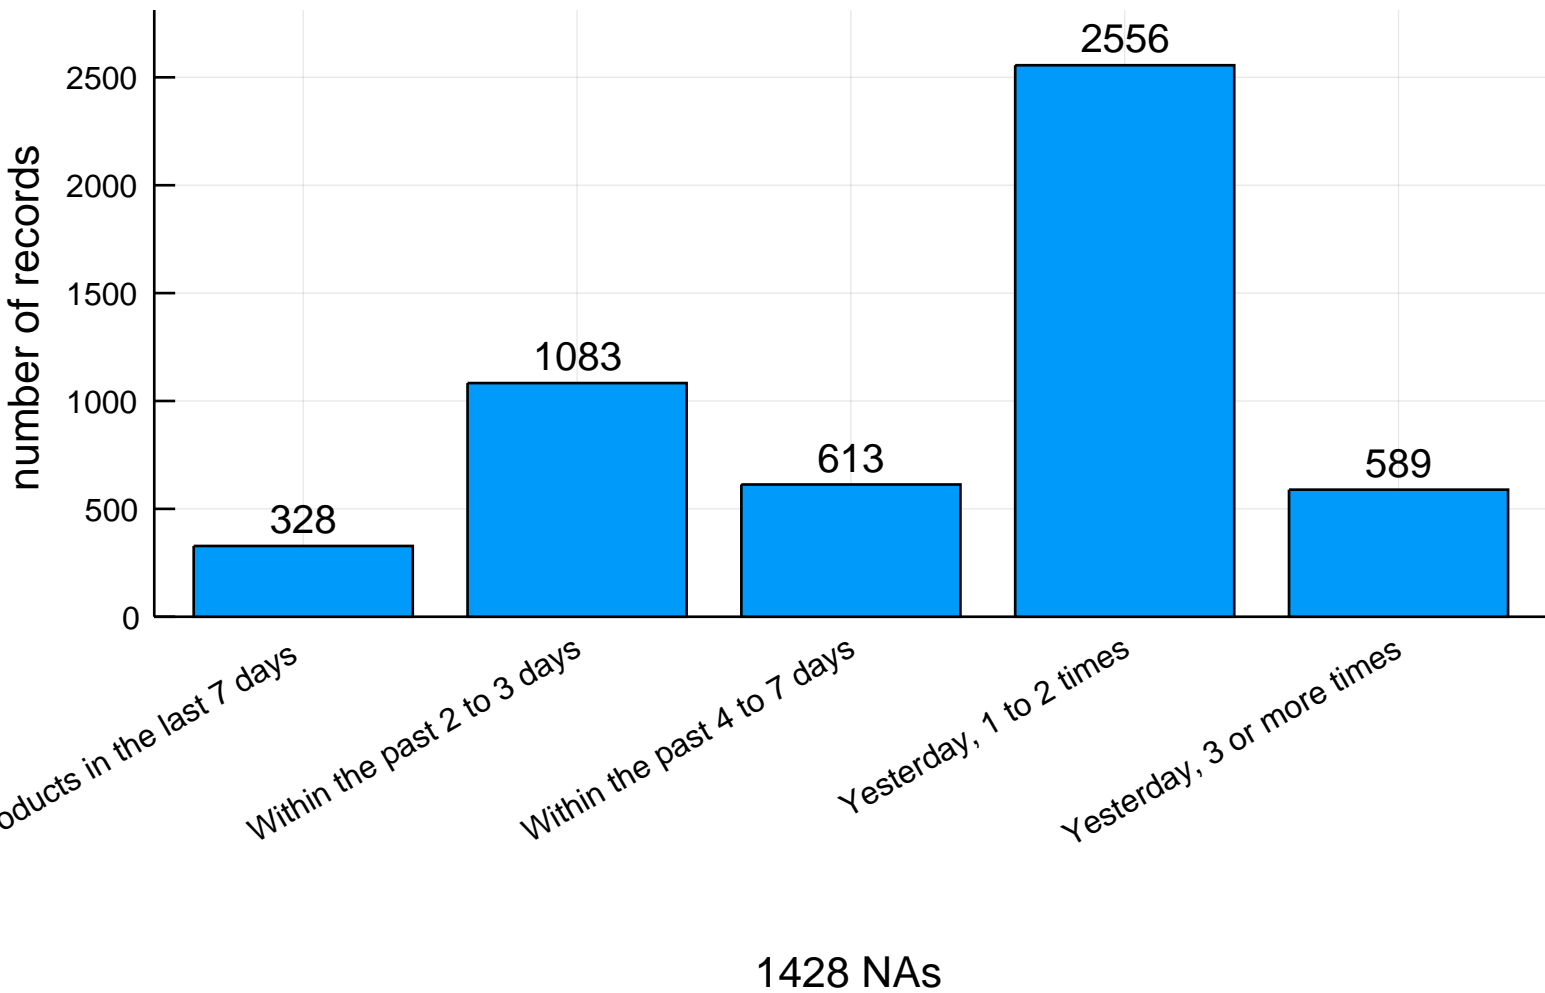



# Sulfasalazine Azulfidine (per site\_sub\_coll)

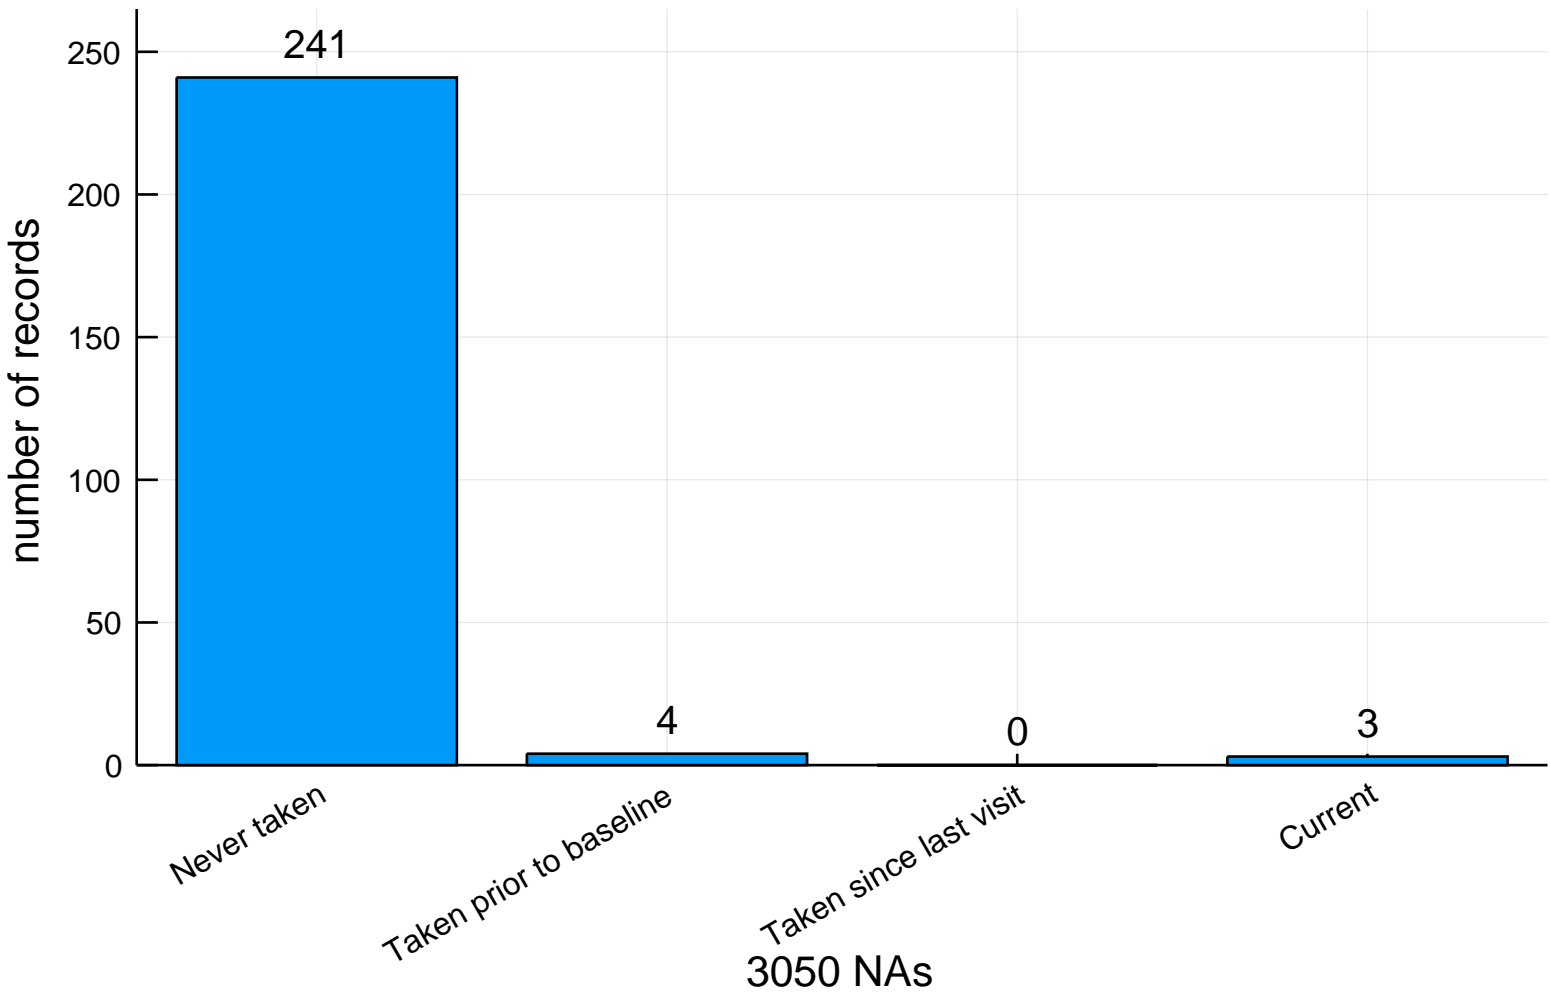

# Sweets pies jam chocolate cake cookies e (per row)

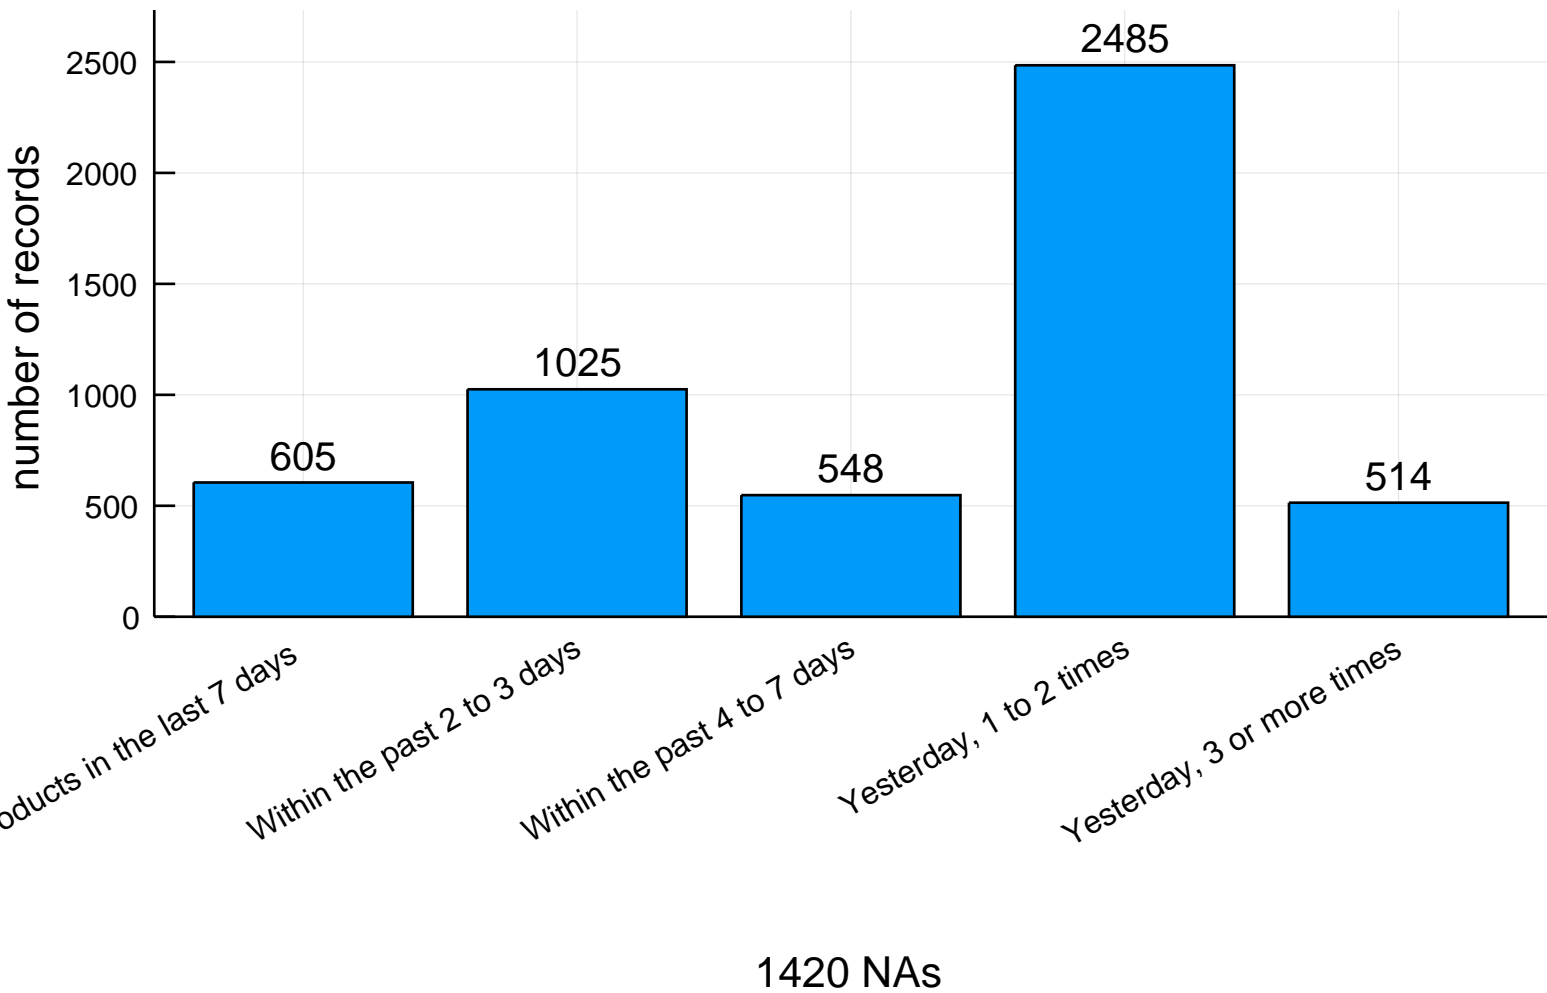

# Tea or coffee no sugar and no sugar repl (per site\_sub\_coll)

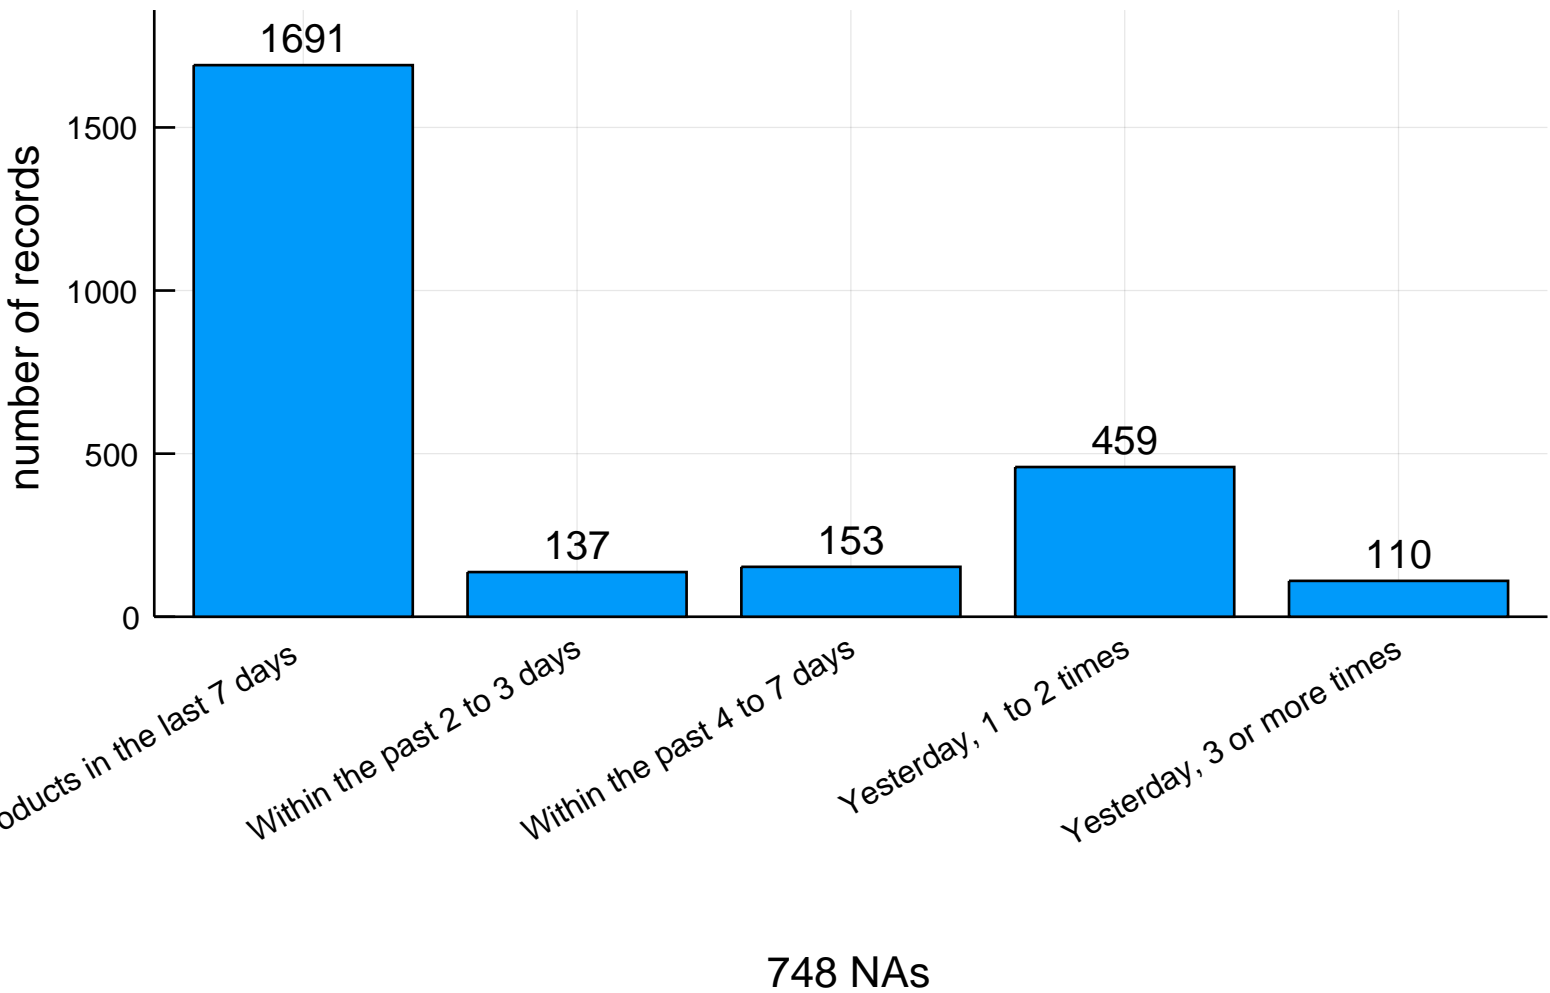

# Thyroid disease uncertain diagnosis not (per site\_sub\_coll)

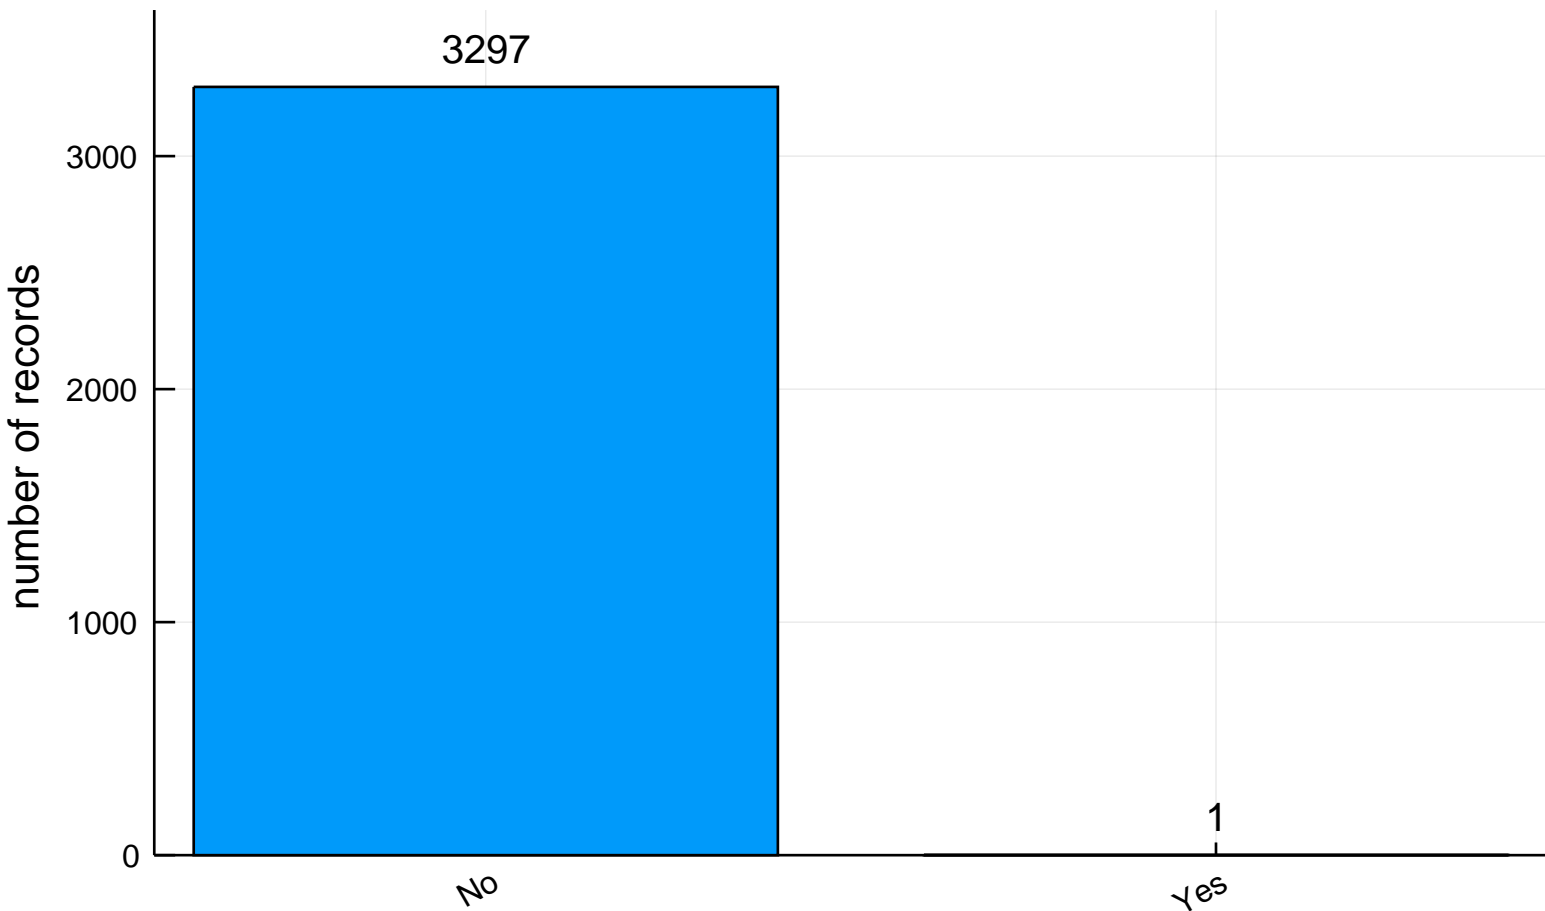

0 NAs

# Tongue cleaner (per Participant\_ID)

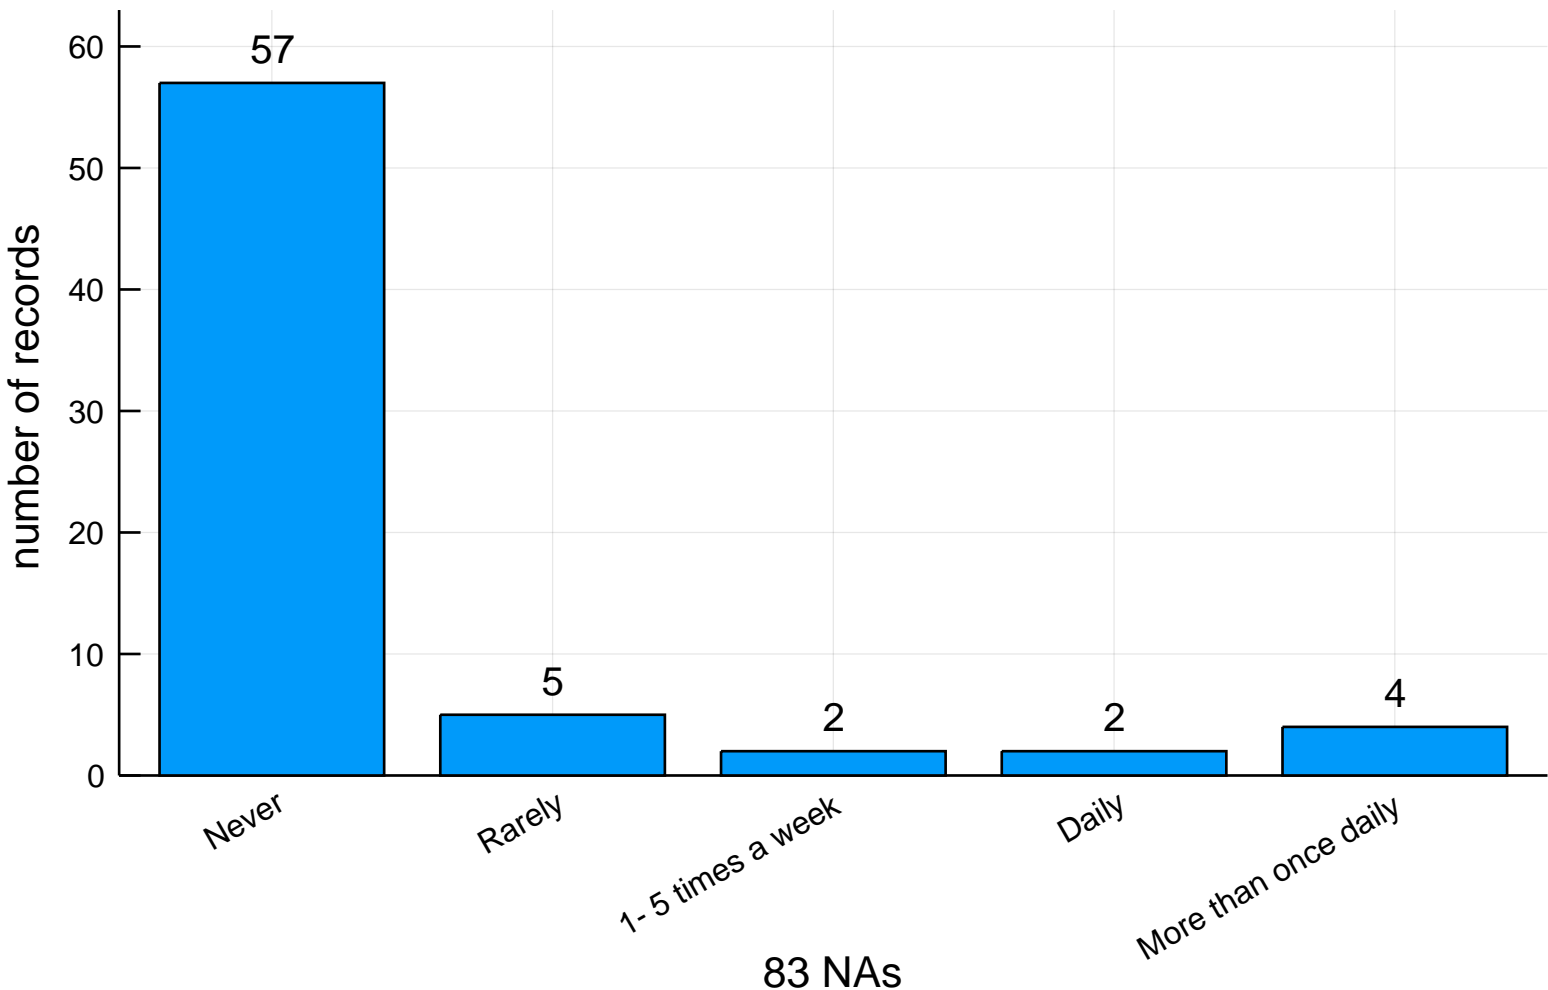

# Tooth whiteners (per Participant\_ID)

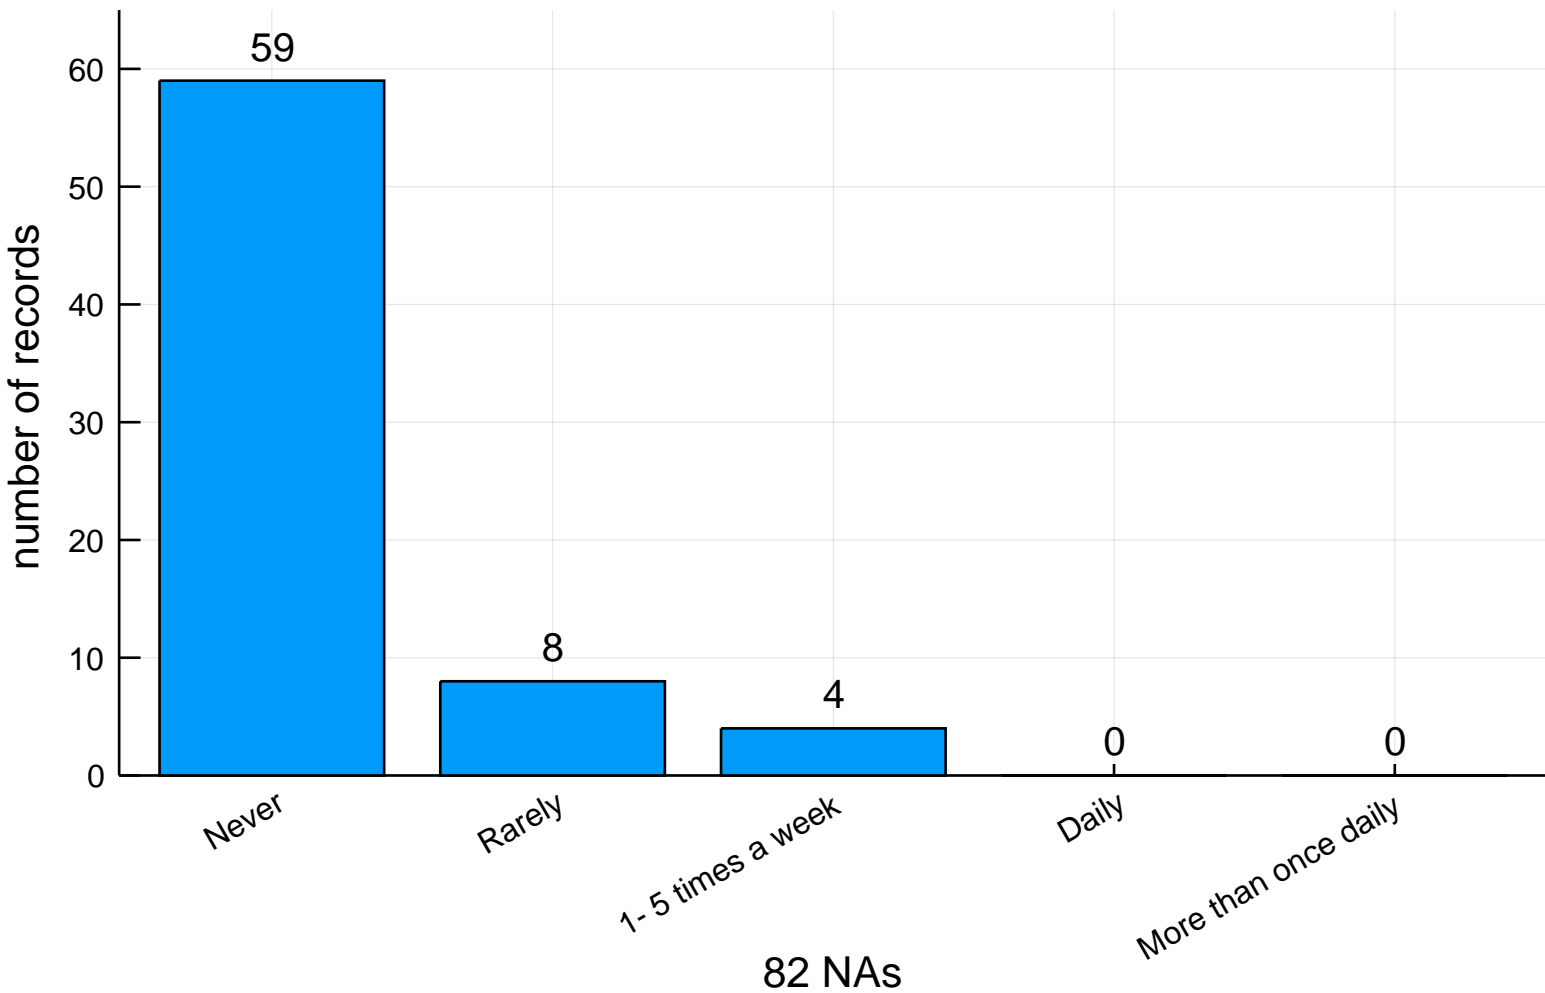

# Total (per row)

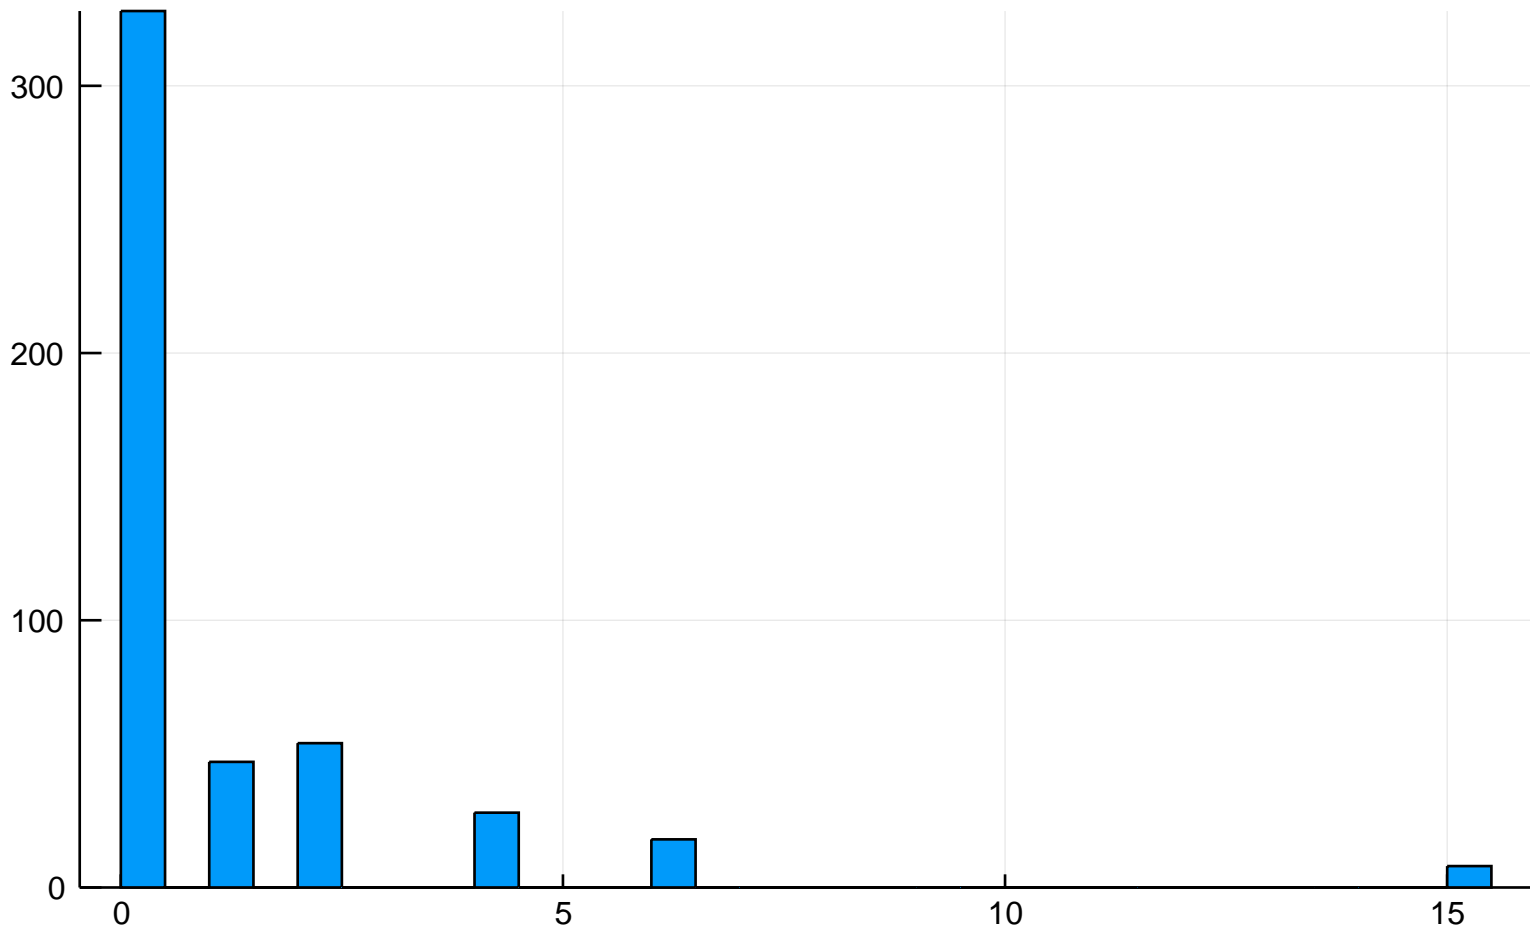

Mean: 1.02, stdev: 2.35

# Total 1 (per row)

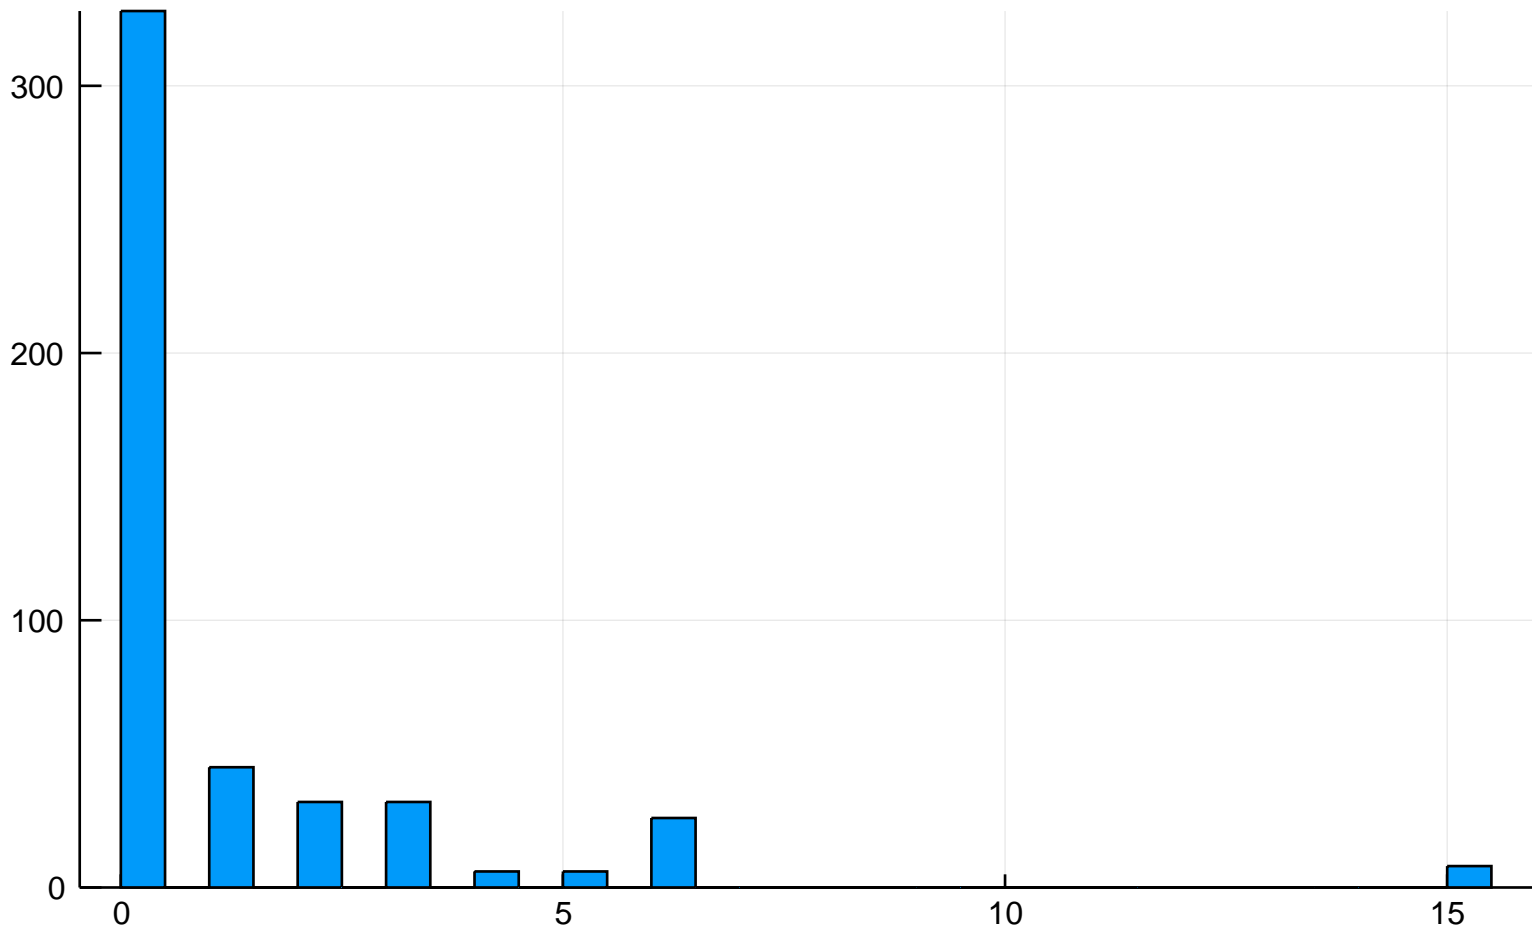

Mean: 1.11, stdev: 2.43



# Total 2 (per row)

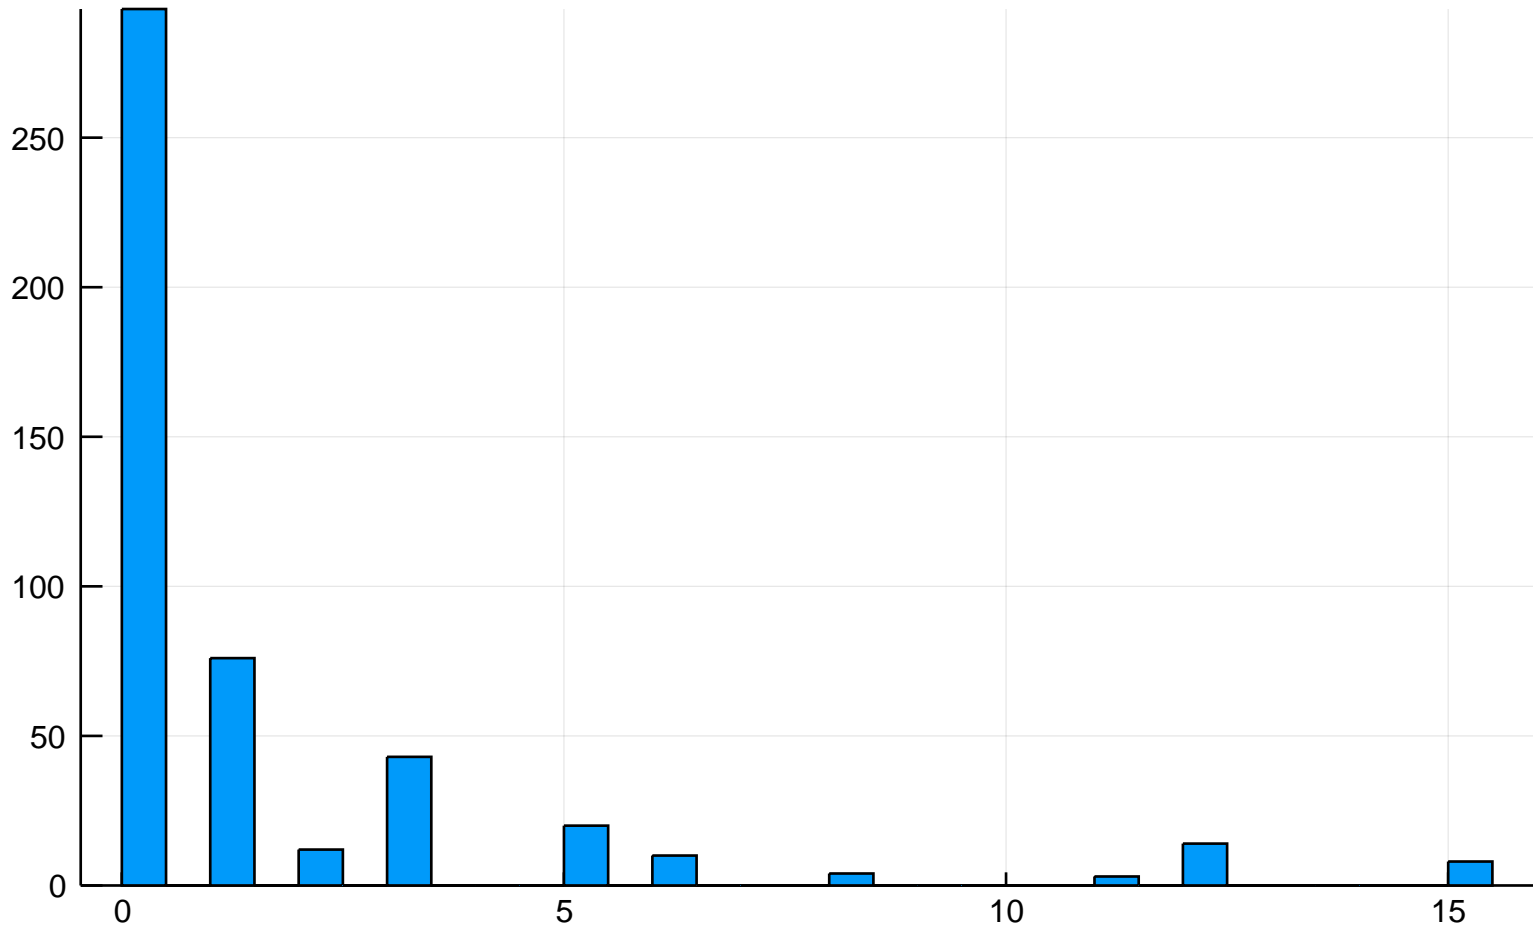

Mean: 1.54, stdev: 3.11

# Total 3 (per site\_sub\_coll)

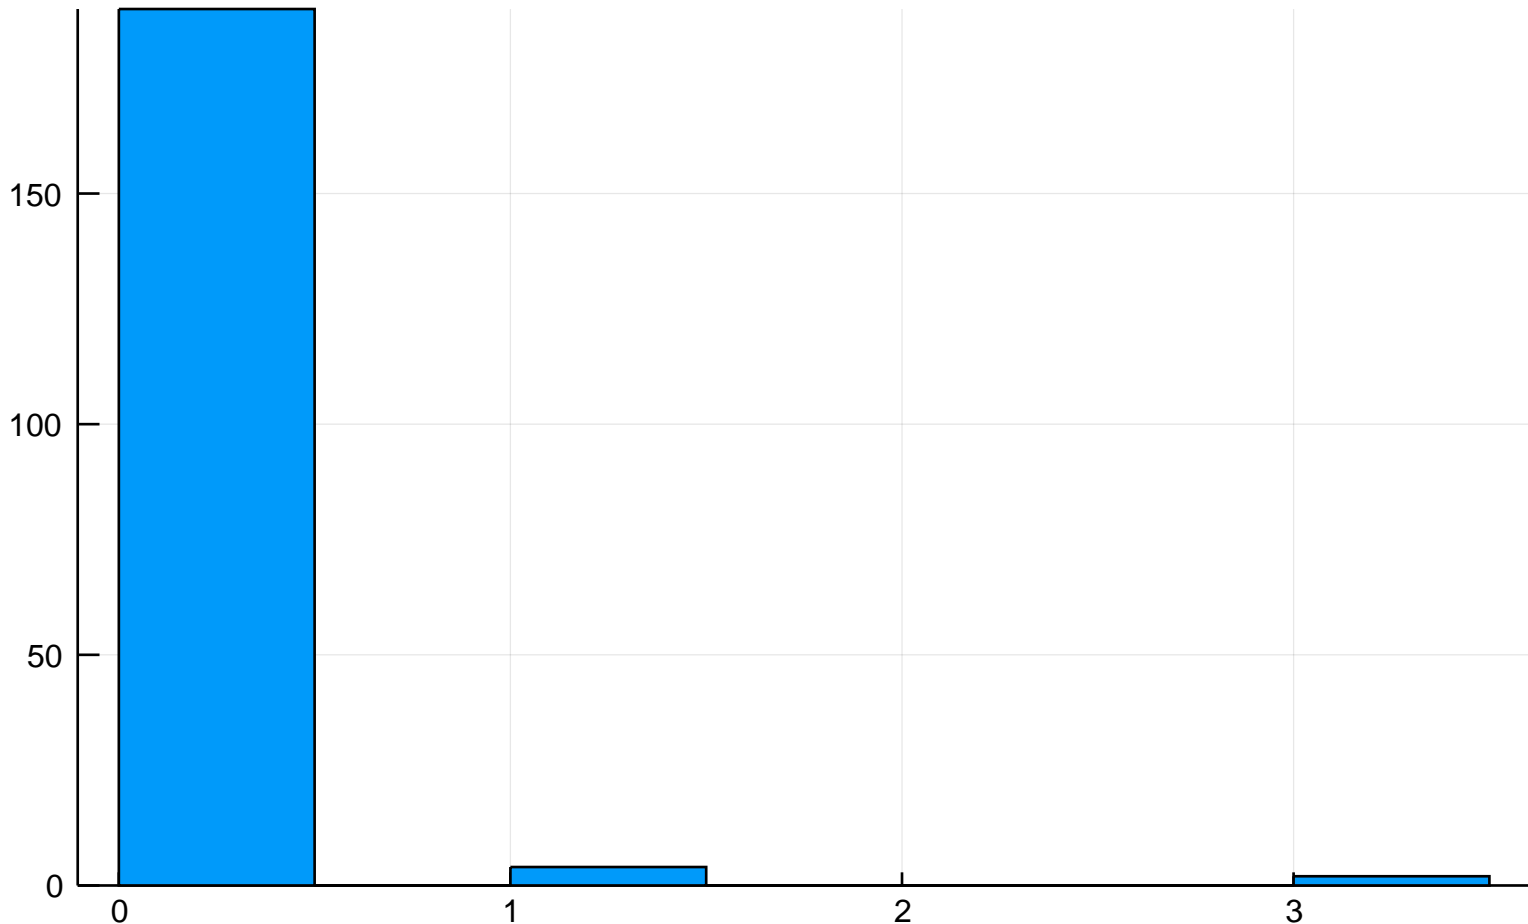

Mean: 0.05, stdev: 0.33

# total reads (per row)

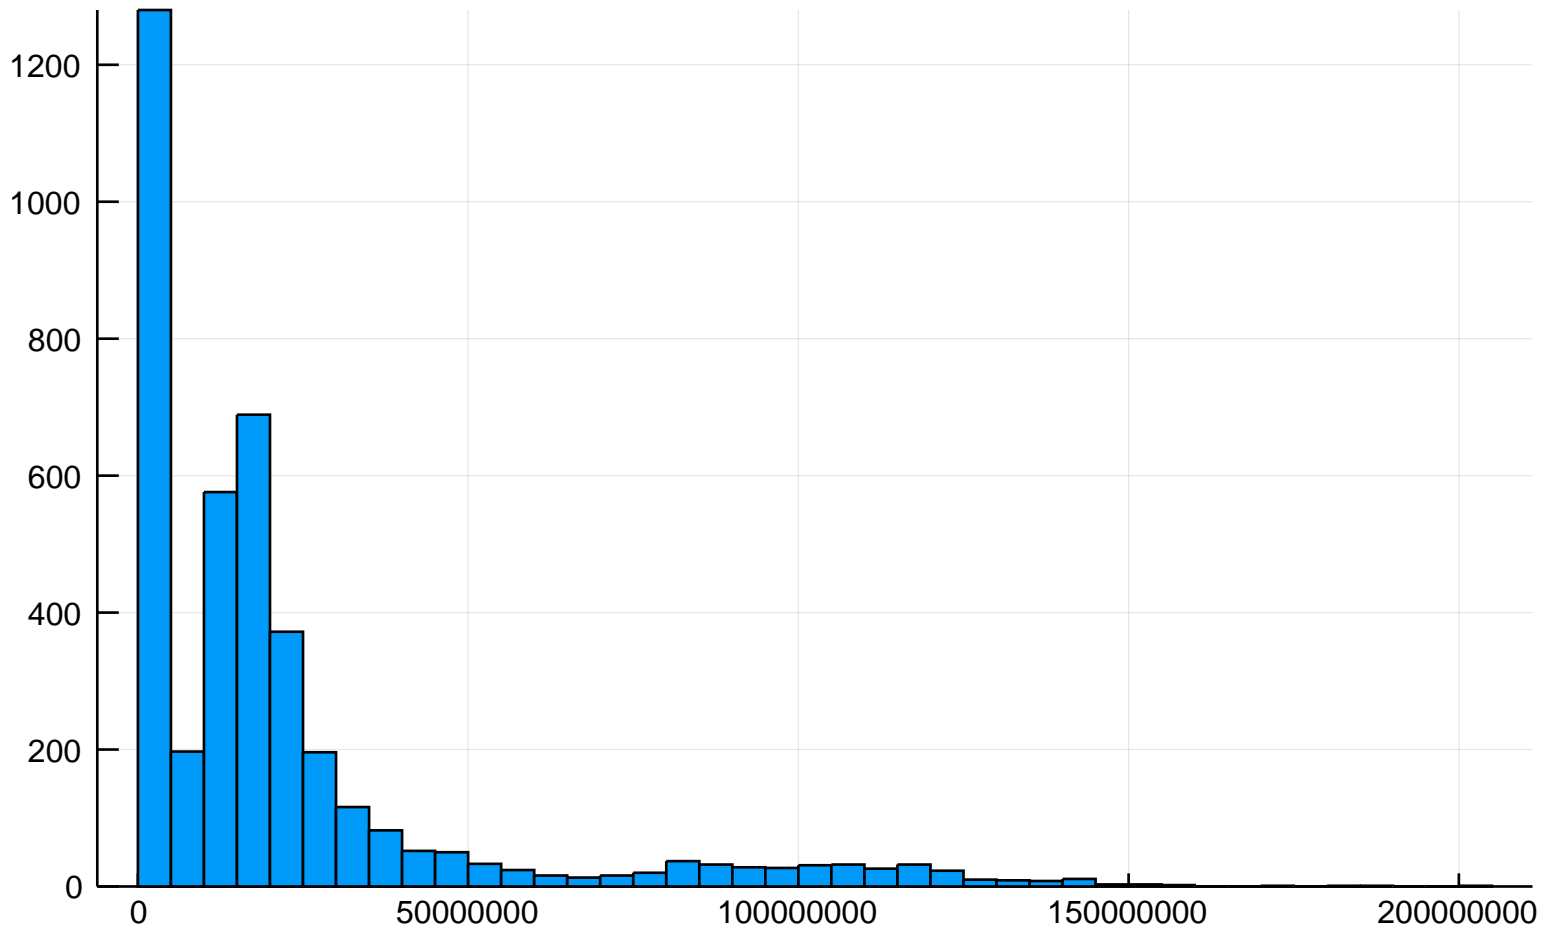

Mean: 2.195060448e7, stdev: 2.920924262e7

# Transverse Colon (per Participant\_ID)

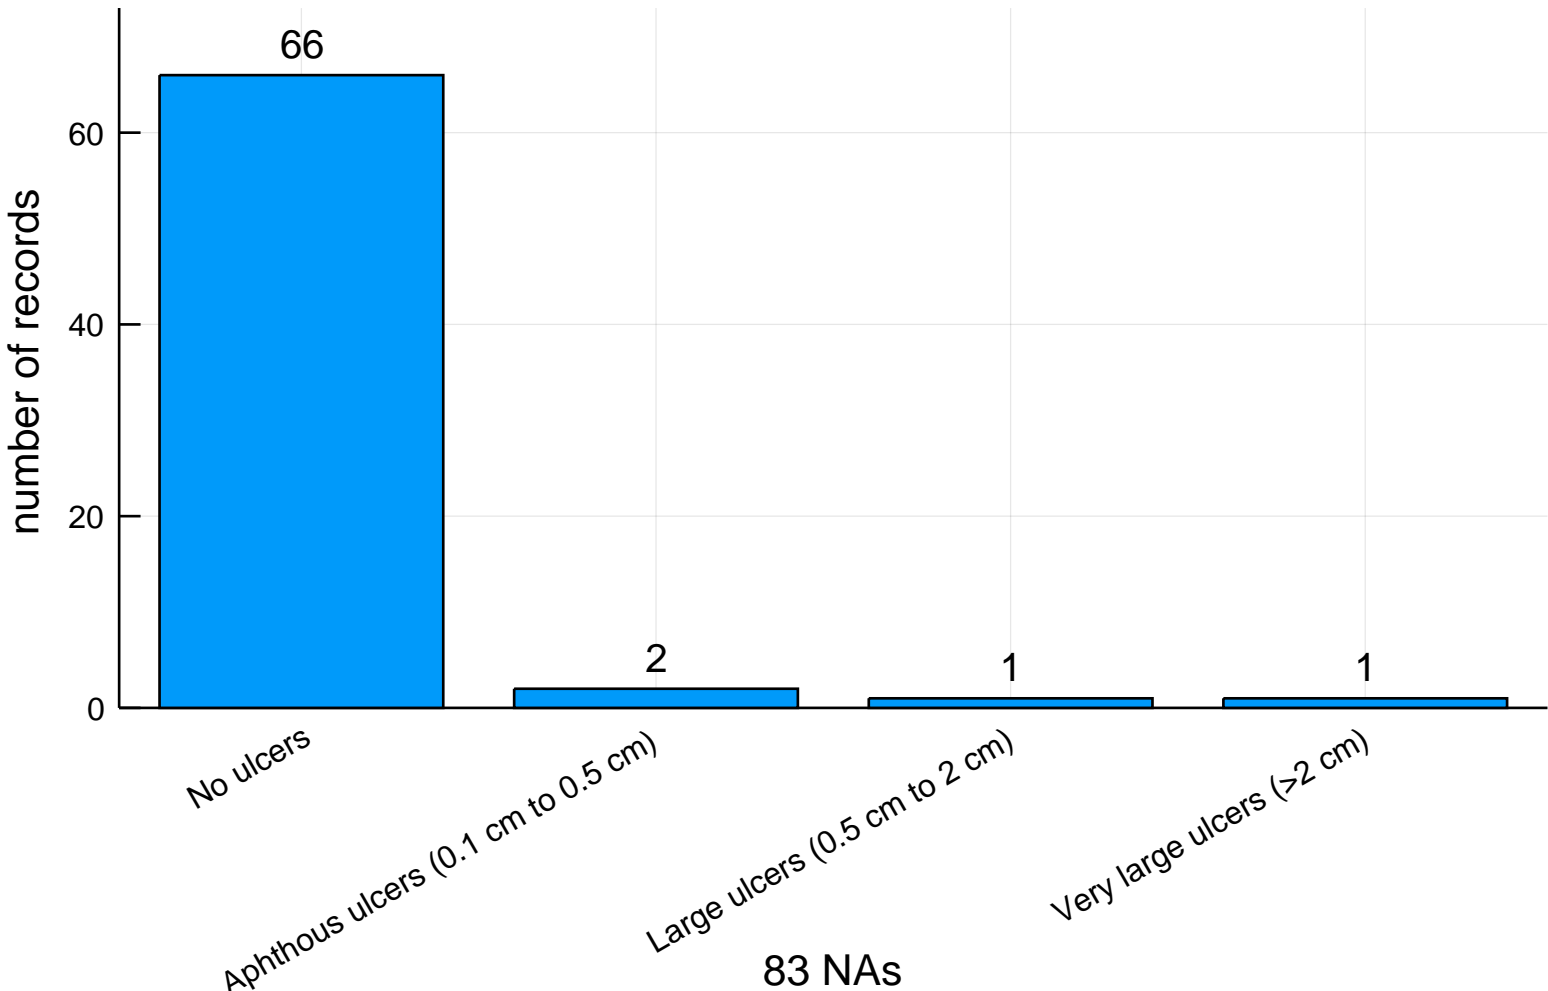

# Transverse Colon 1 (per Participant\_ID)

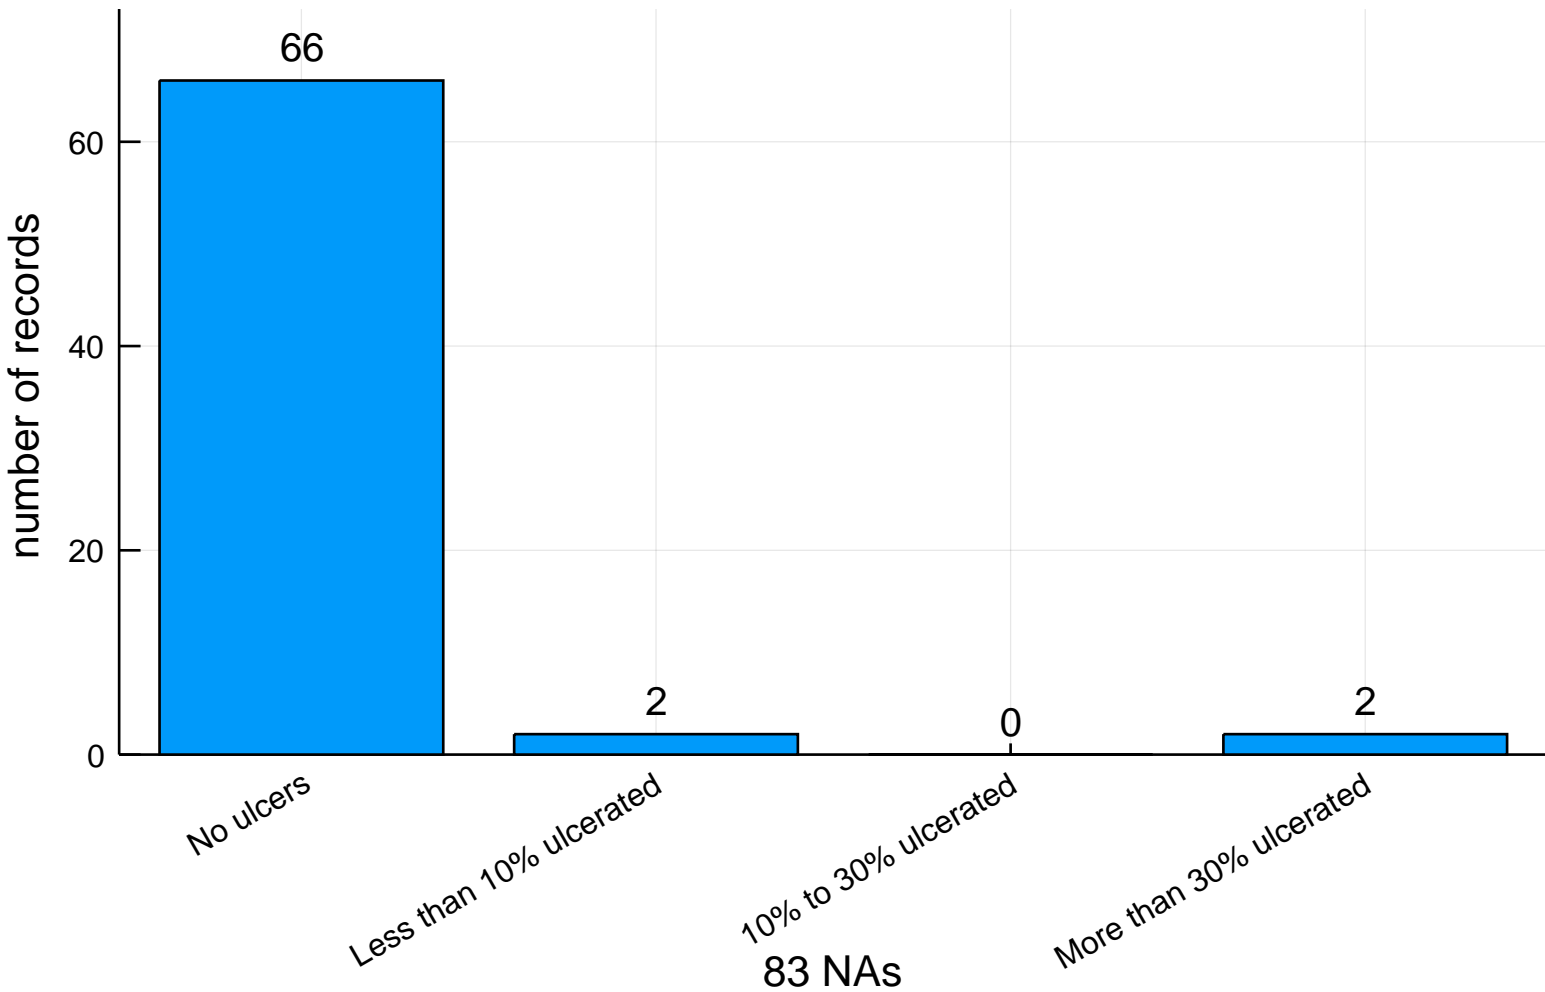

# Transverse Colon 2 (per site\_sub\_coll)

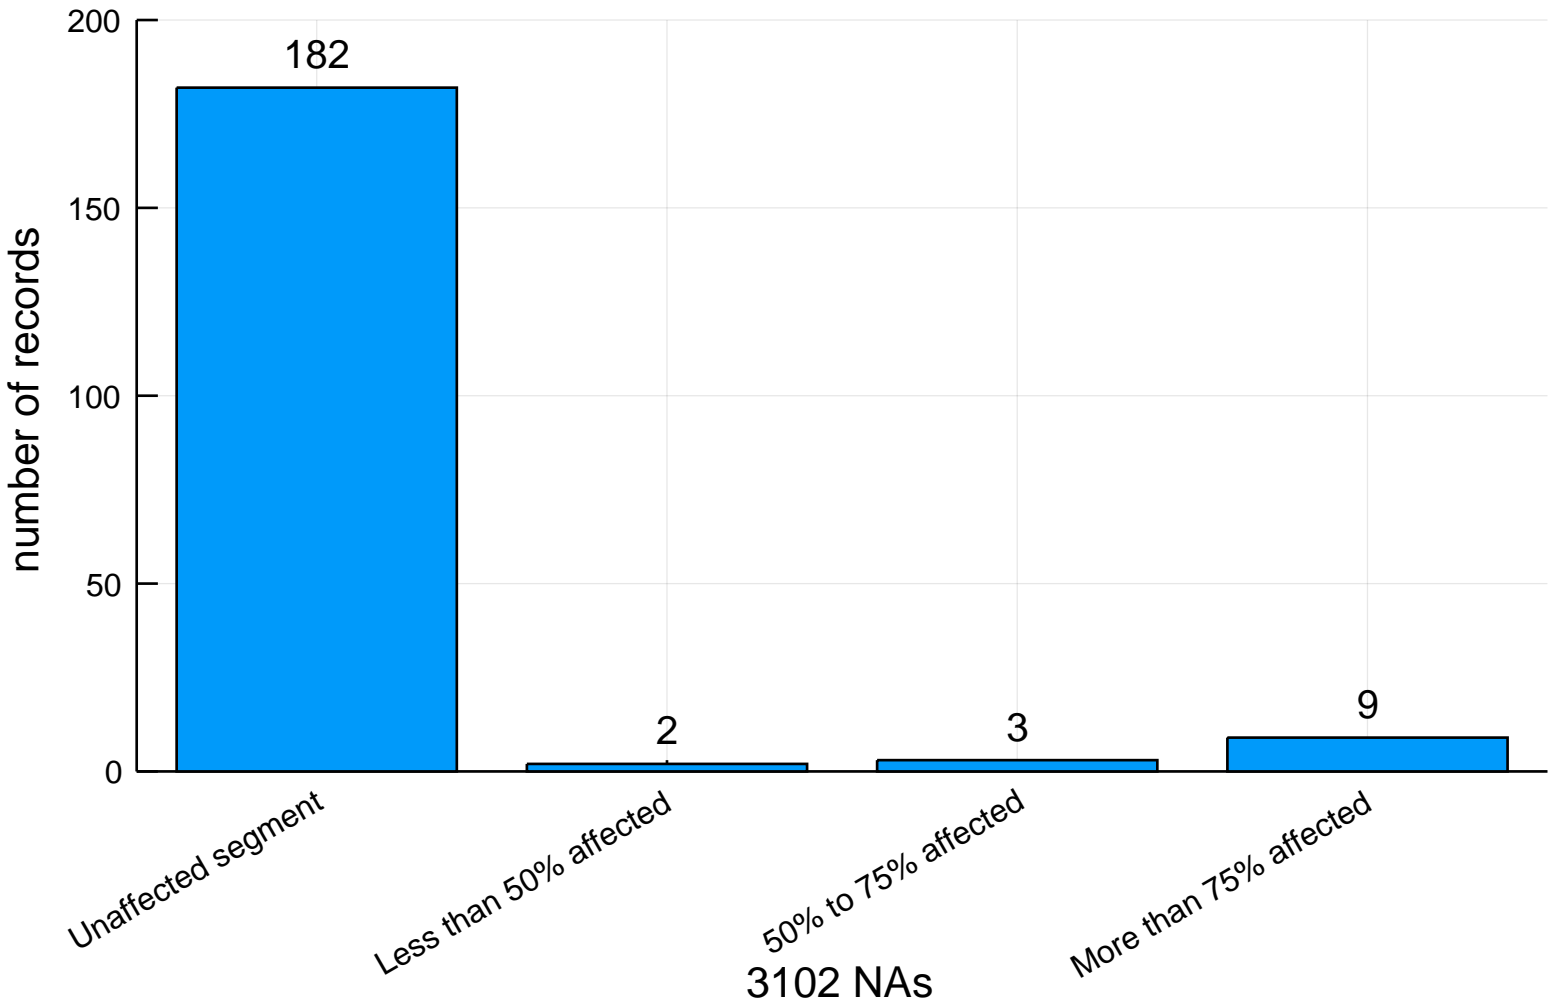

# trimmed reads (per row)

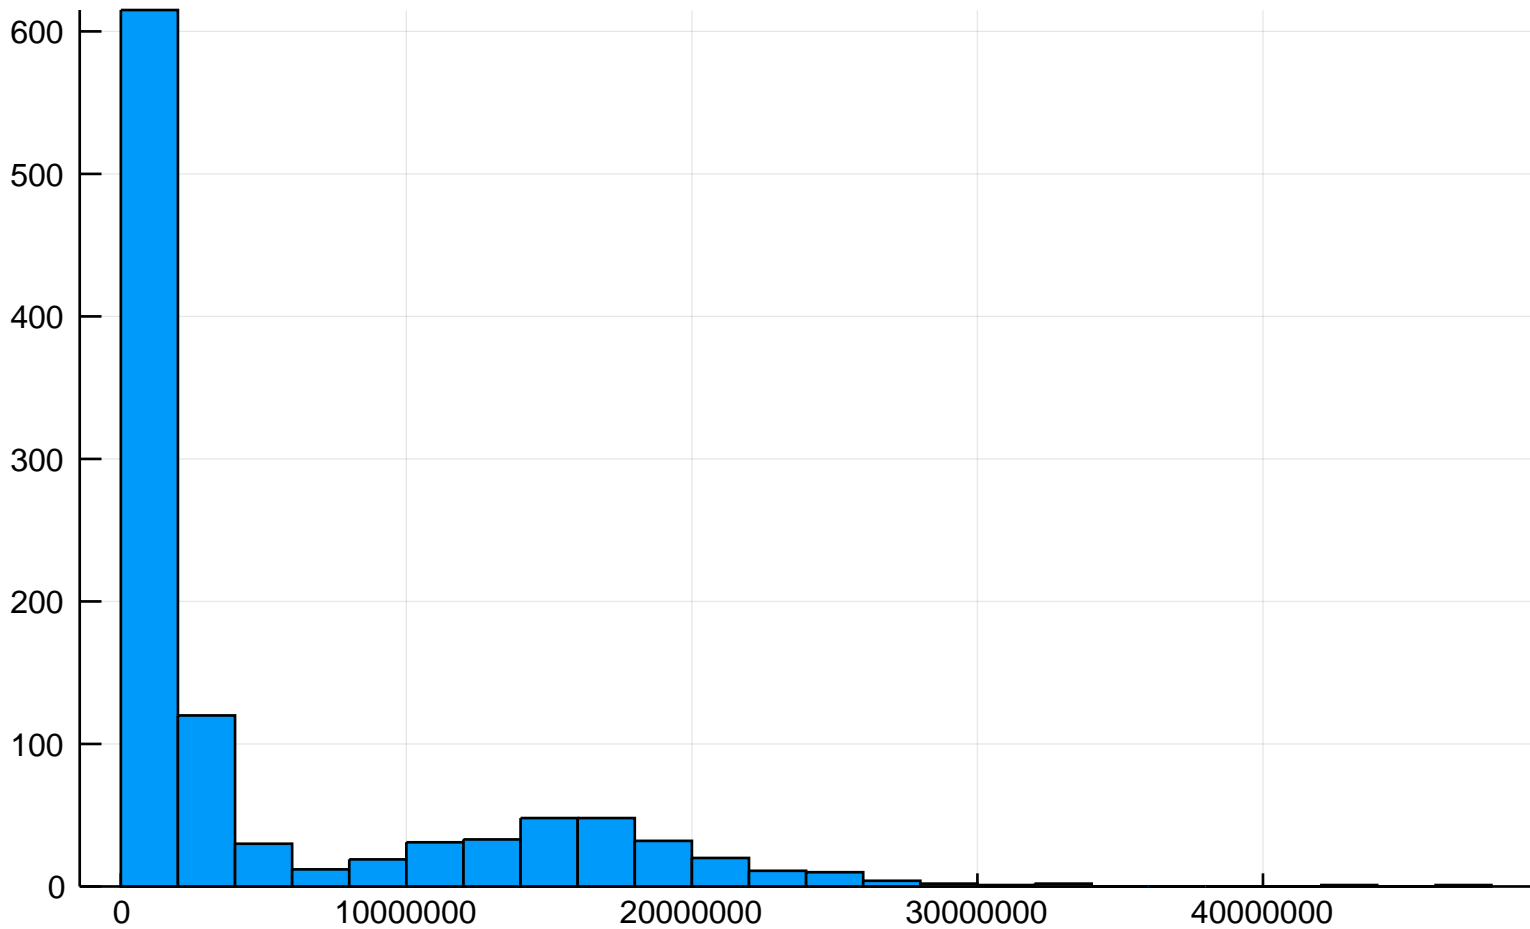

Mean: 5.14474832e6, stdev: 7.26718373e6

# Tube A and B received at Broad (per site\_sub\_coll)

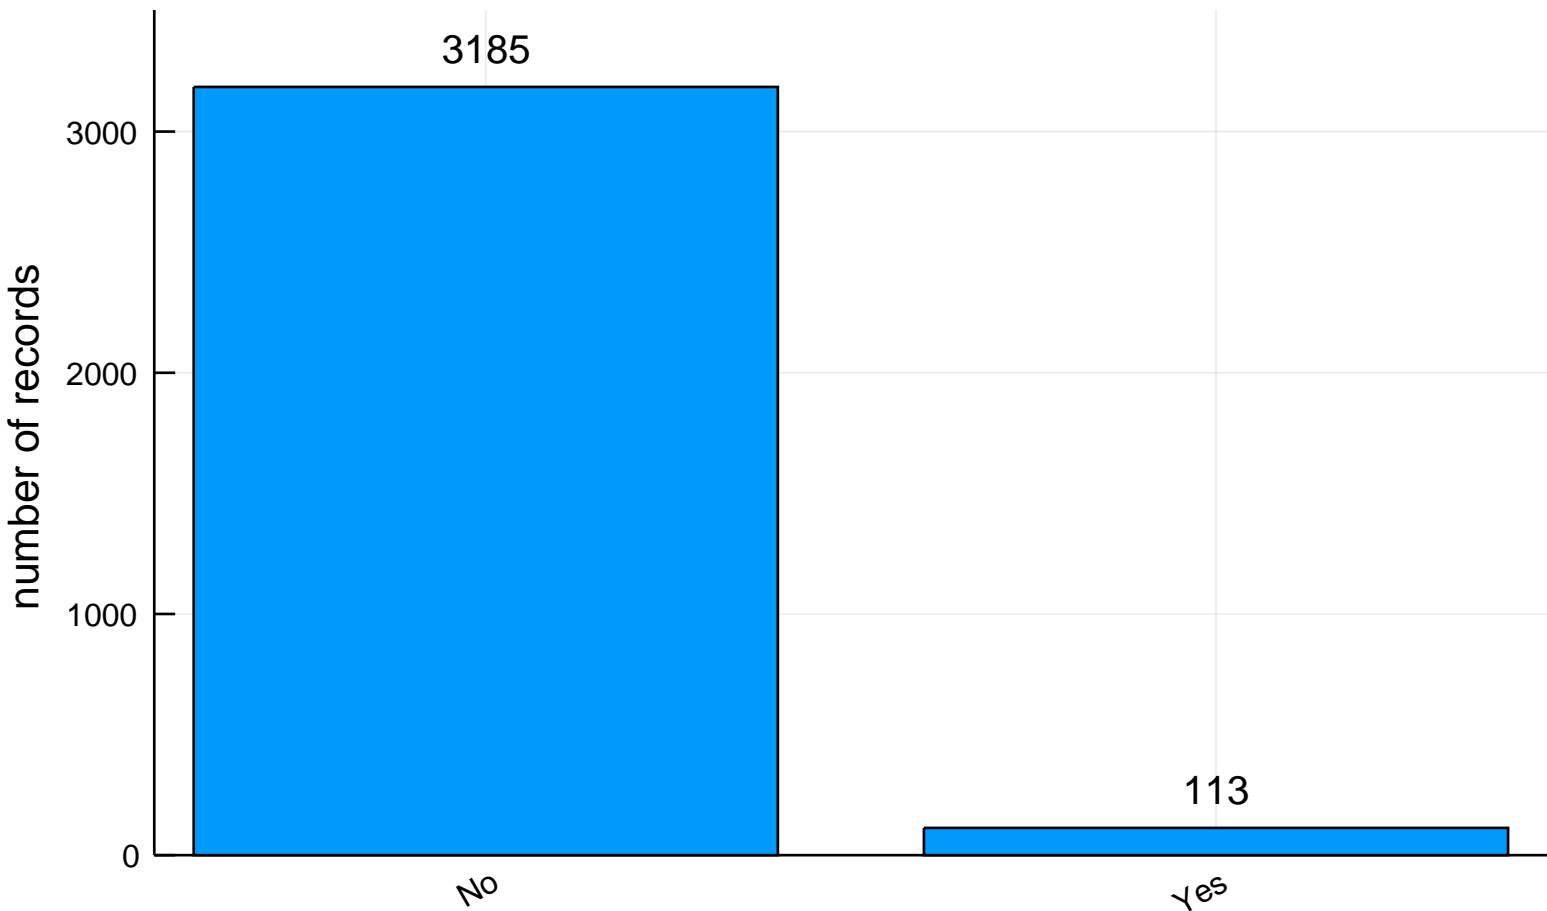

0 NAs



# Urgency of defecation (per site\_sub\_coll)

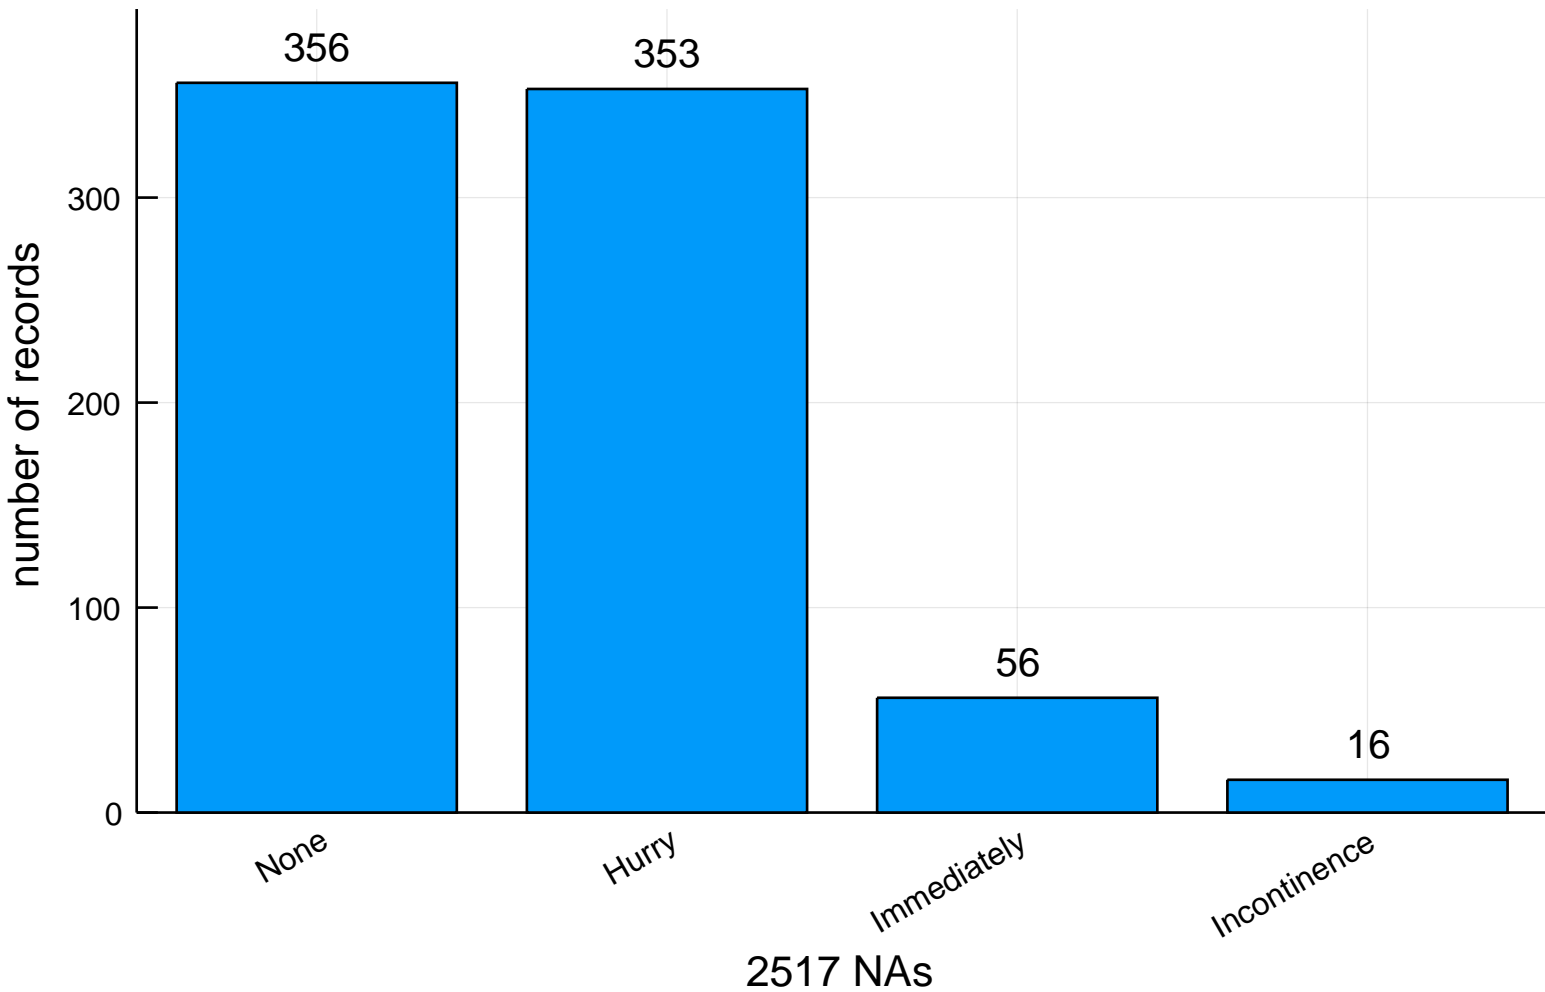

# Uveitis (per site\_sub\_coll)



0 NAs

# Uveitis 1 (per site\_sub\_coll)



0 NAs

# Vegetables salad tomatoes onions greens (per row)

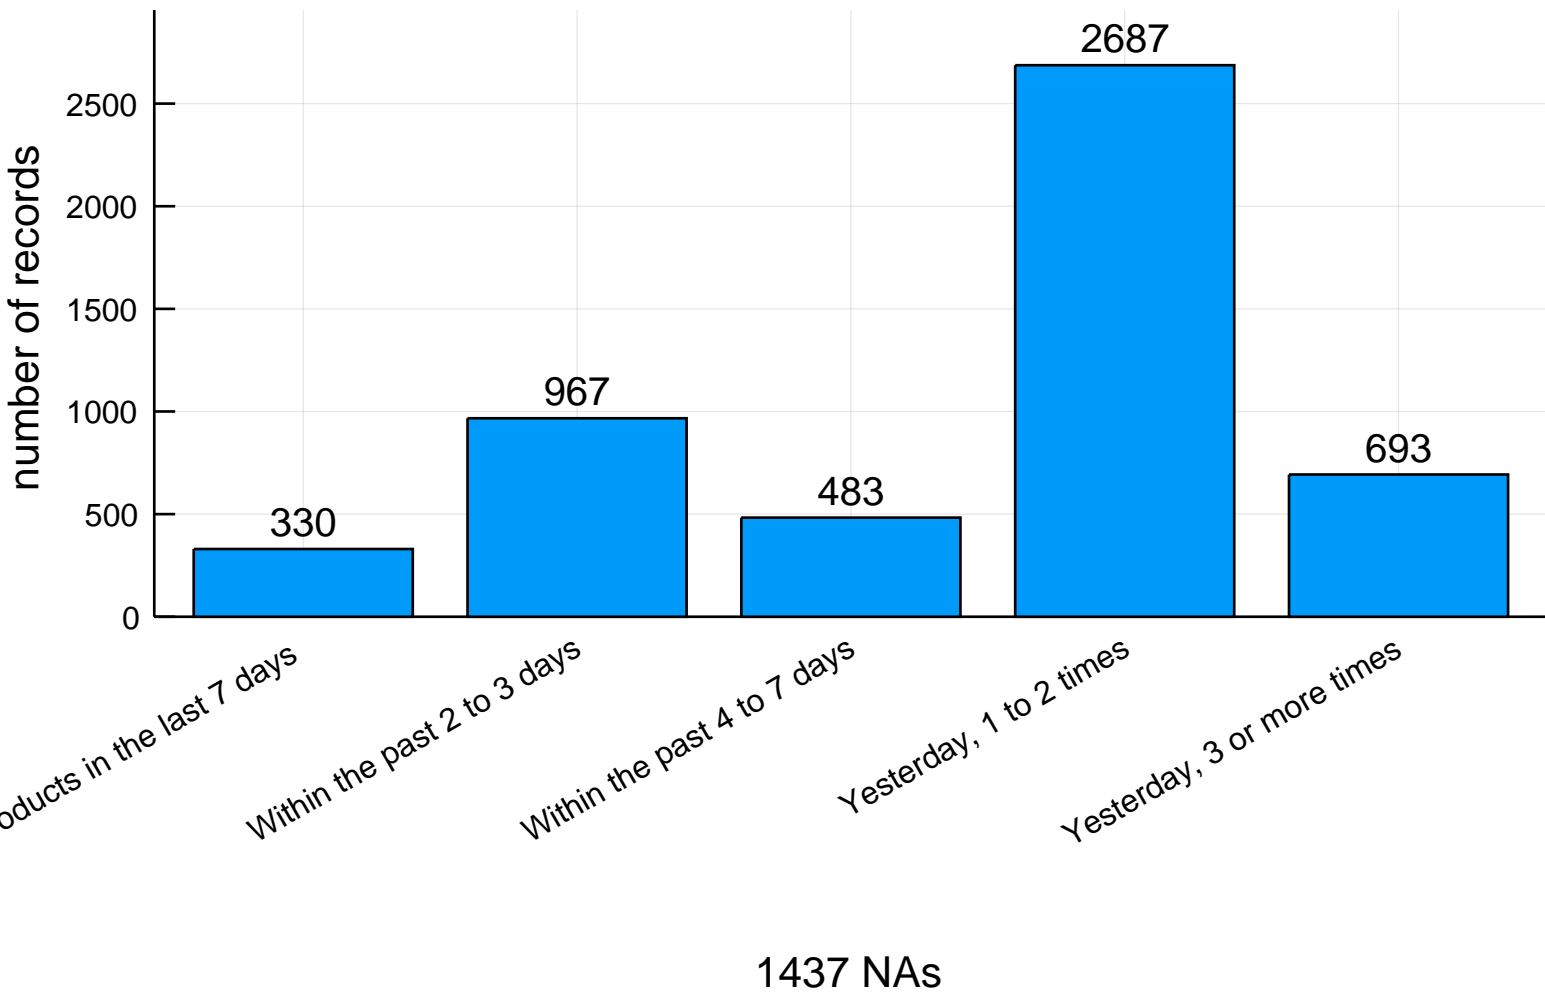

# Viral Reads (per site\_sub\_coll)

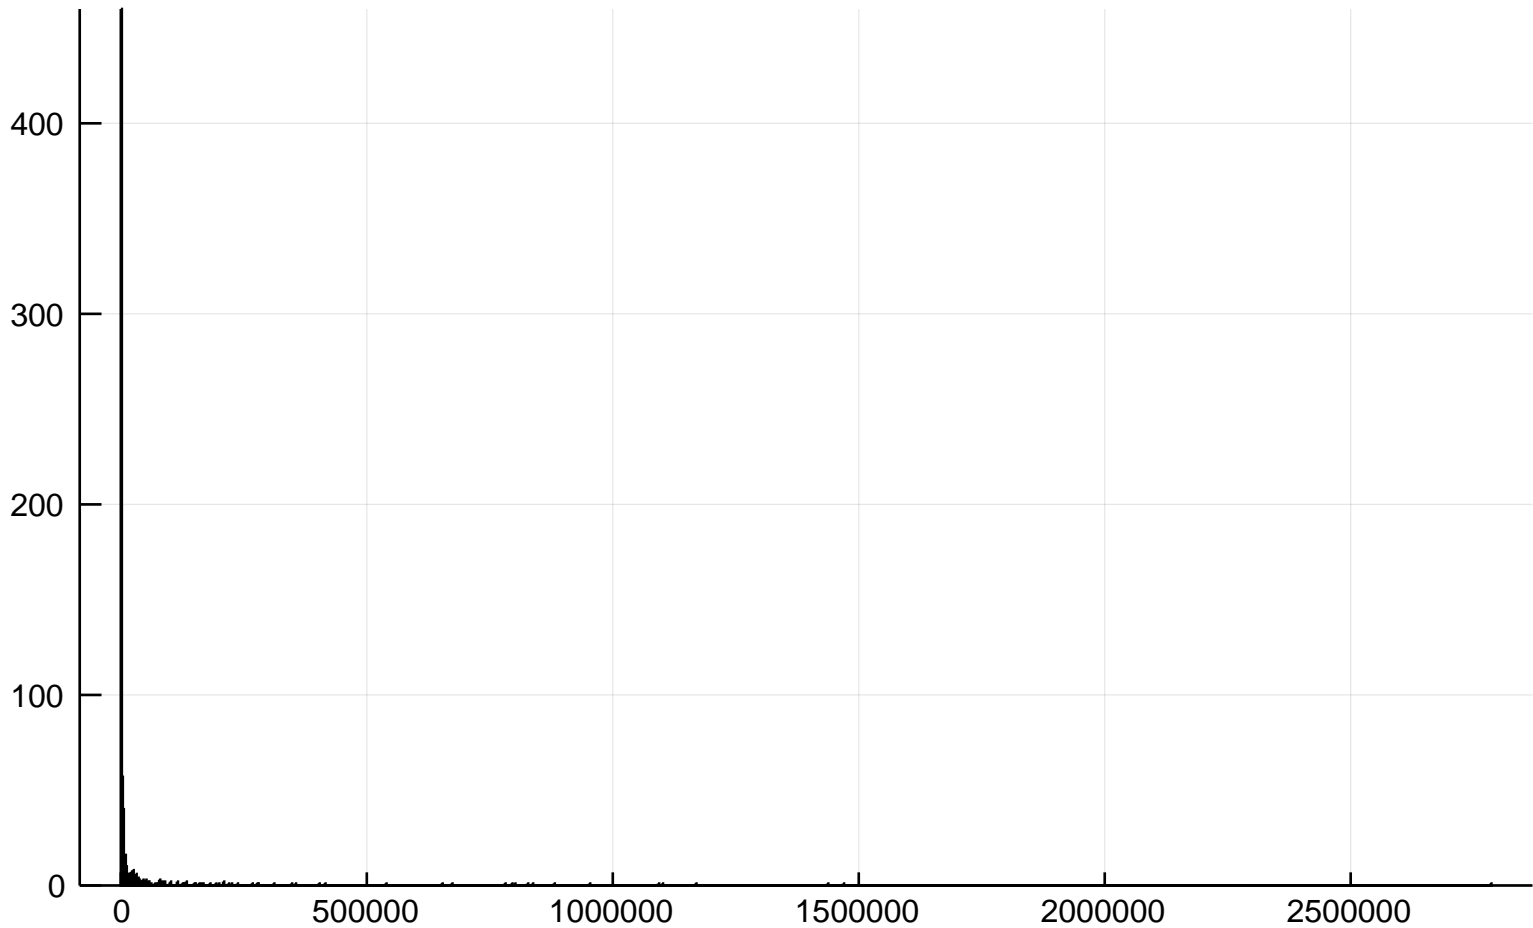

Mean: 37093.88, stdev: 174219.73

# VSL 3 (per site\_sub\_coll)

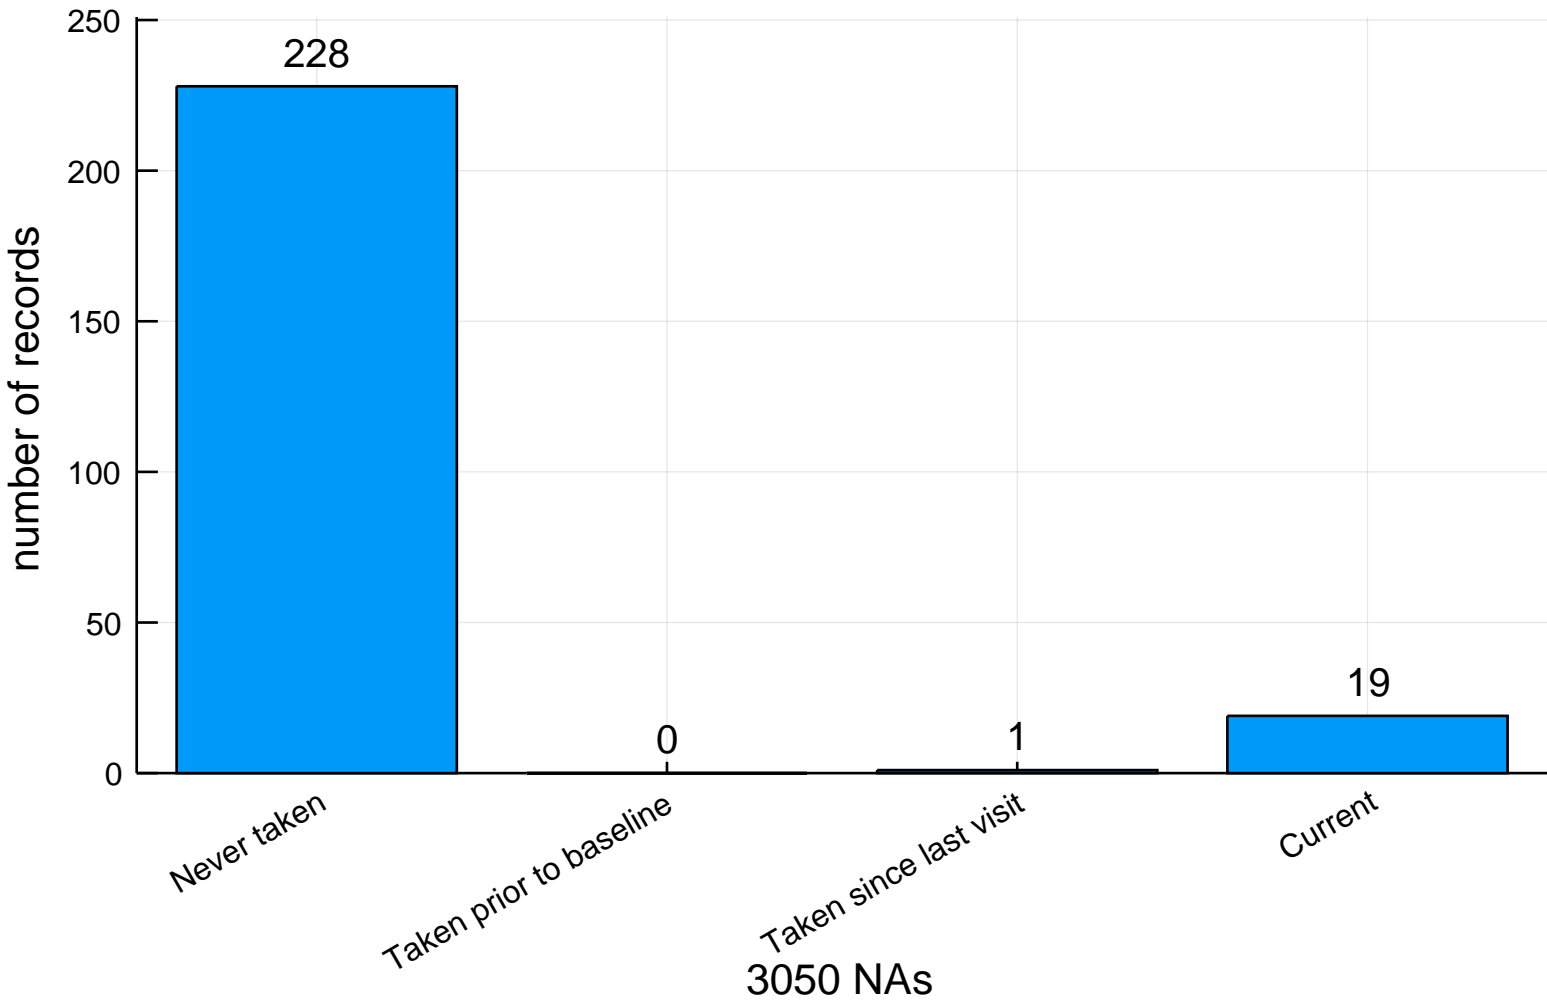

# Was HBI completed (per site\_sub\_coll)

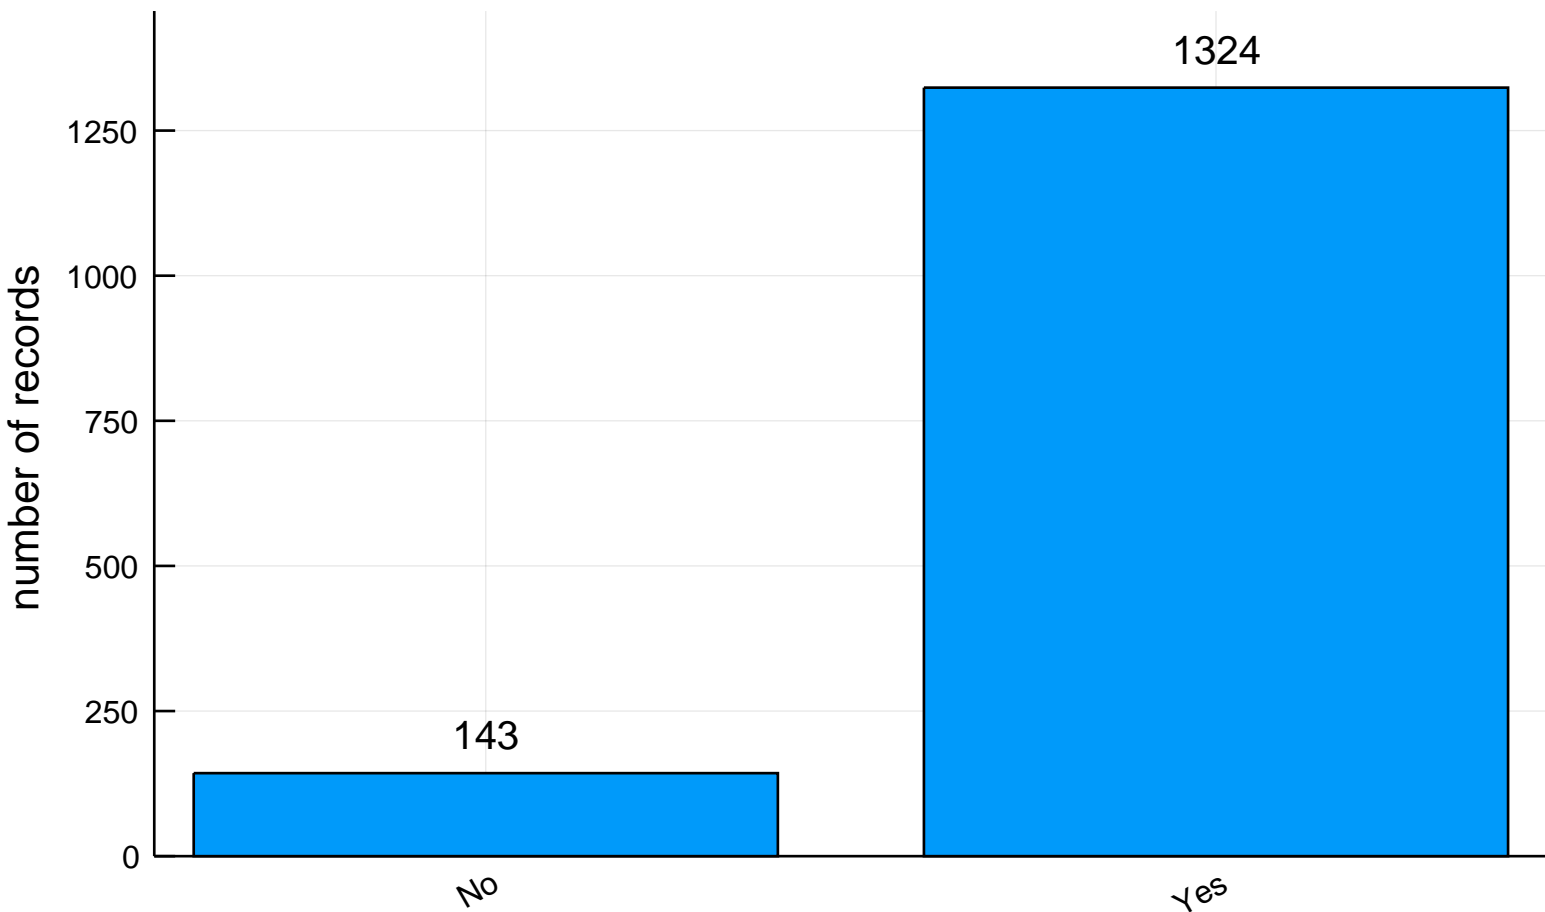

1831 NAs

# Was SCCAI completed (per site\_sub\_coll)

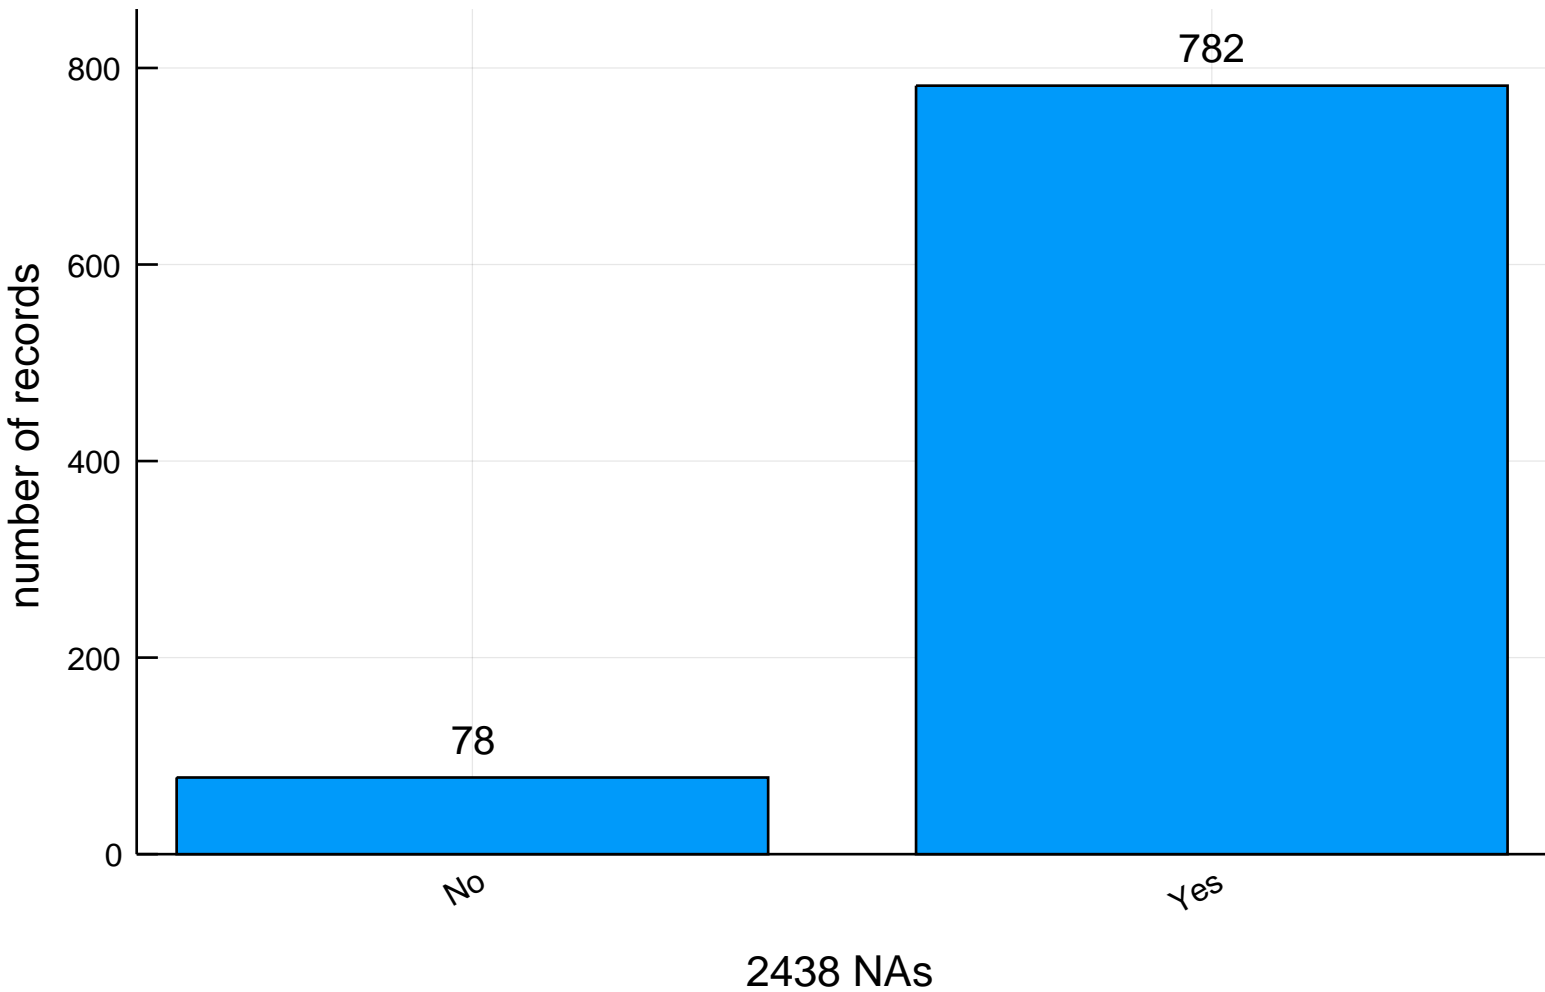



# Was stool sample collected (per site\_sub\_coll)

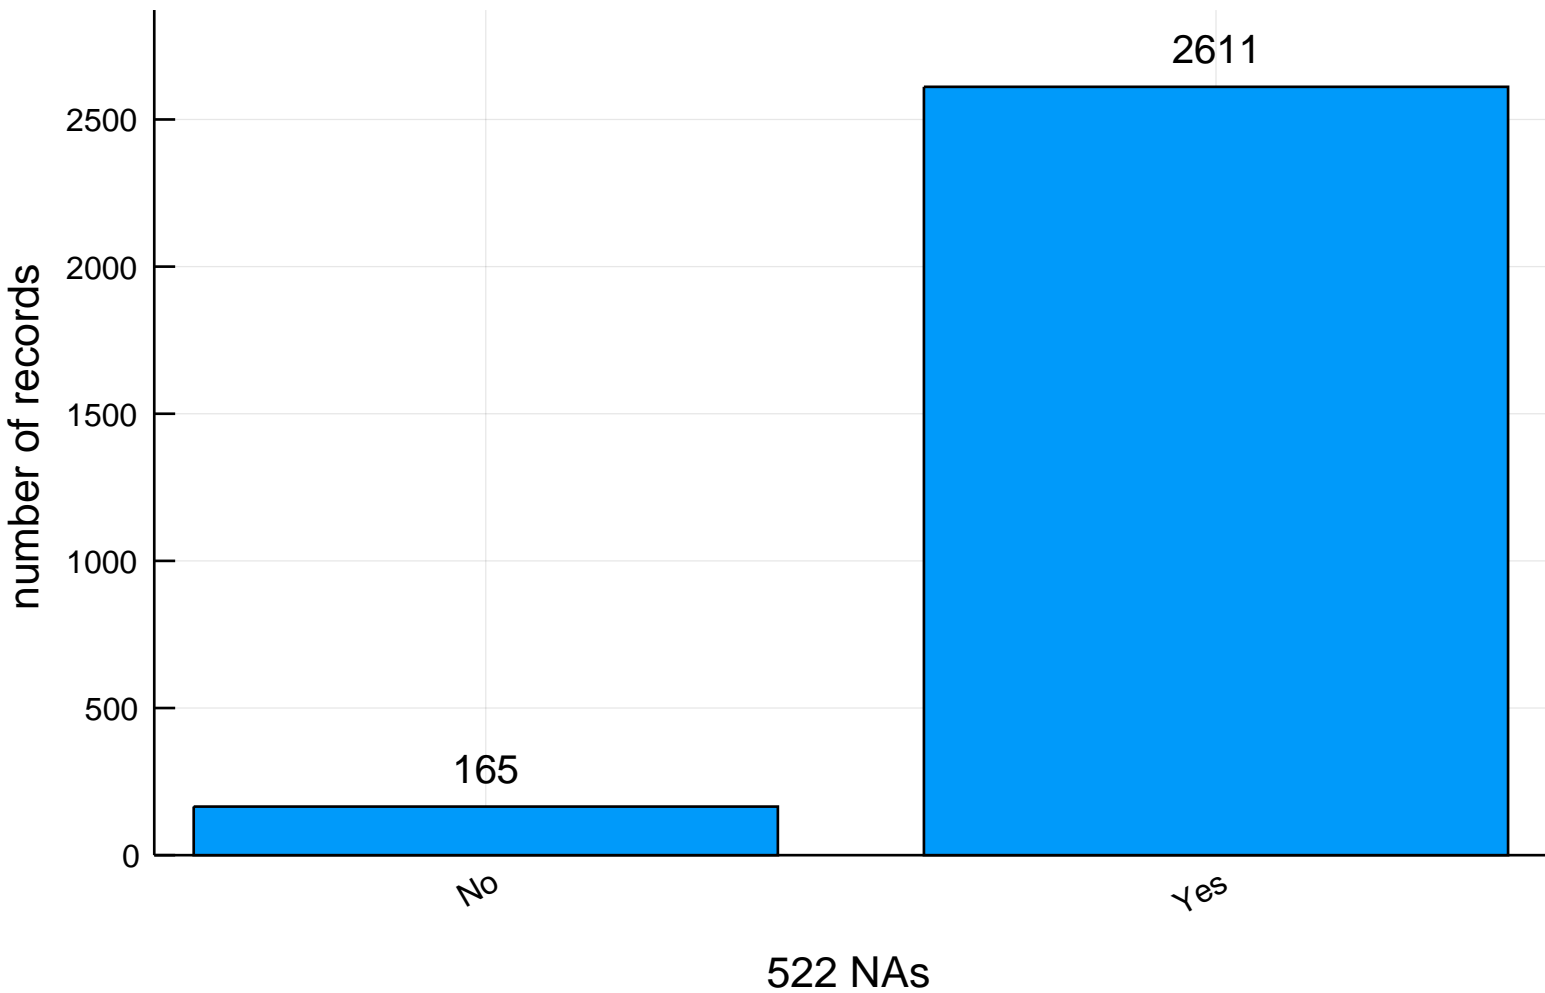

# Was subject terminated by investigator (per Participant\_ID)

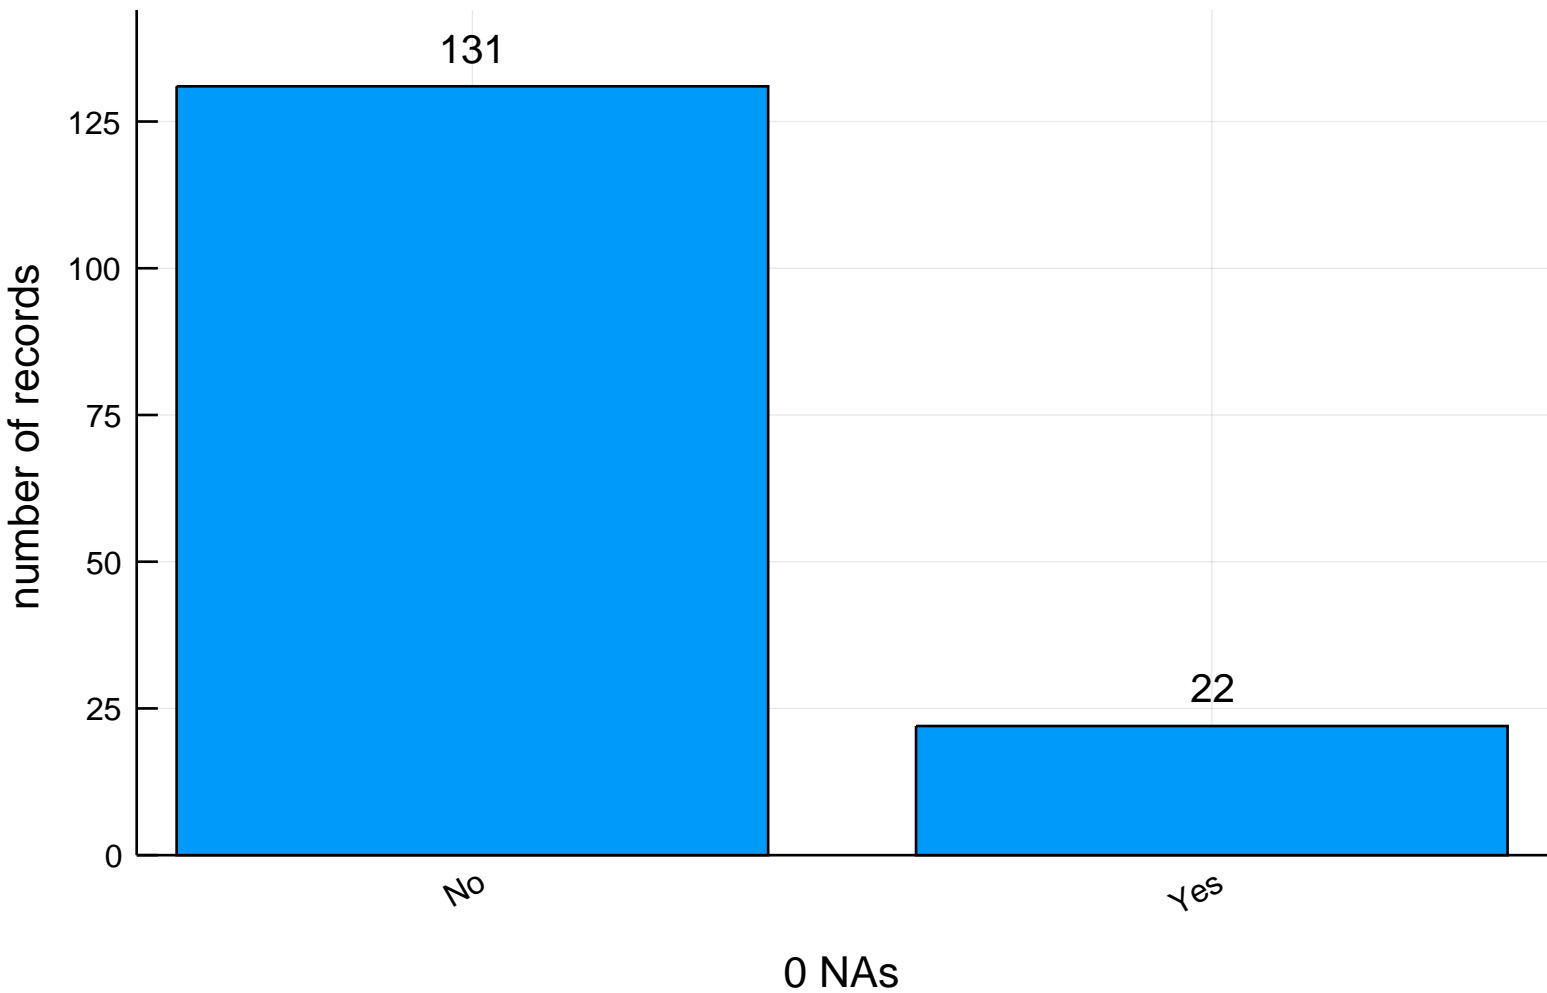

# Was the Modified Baron s Score completed (per row)

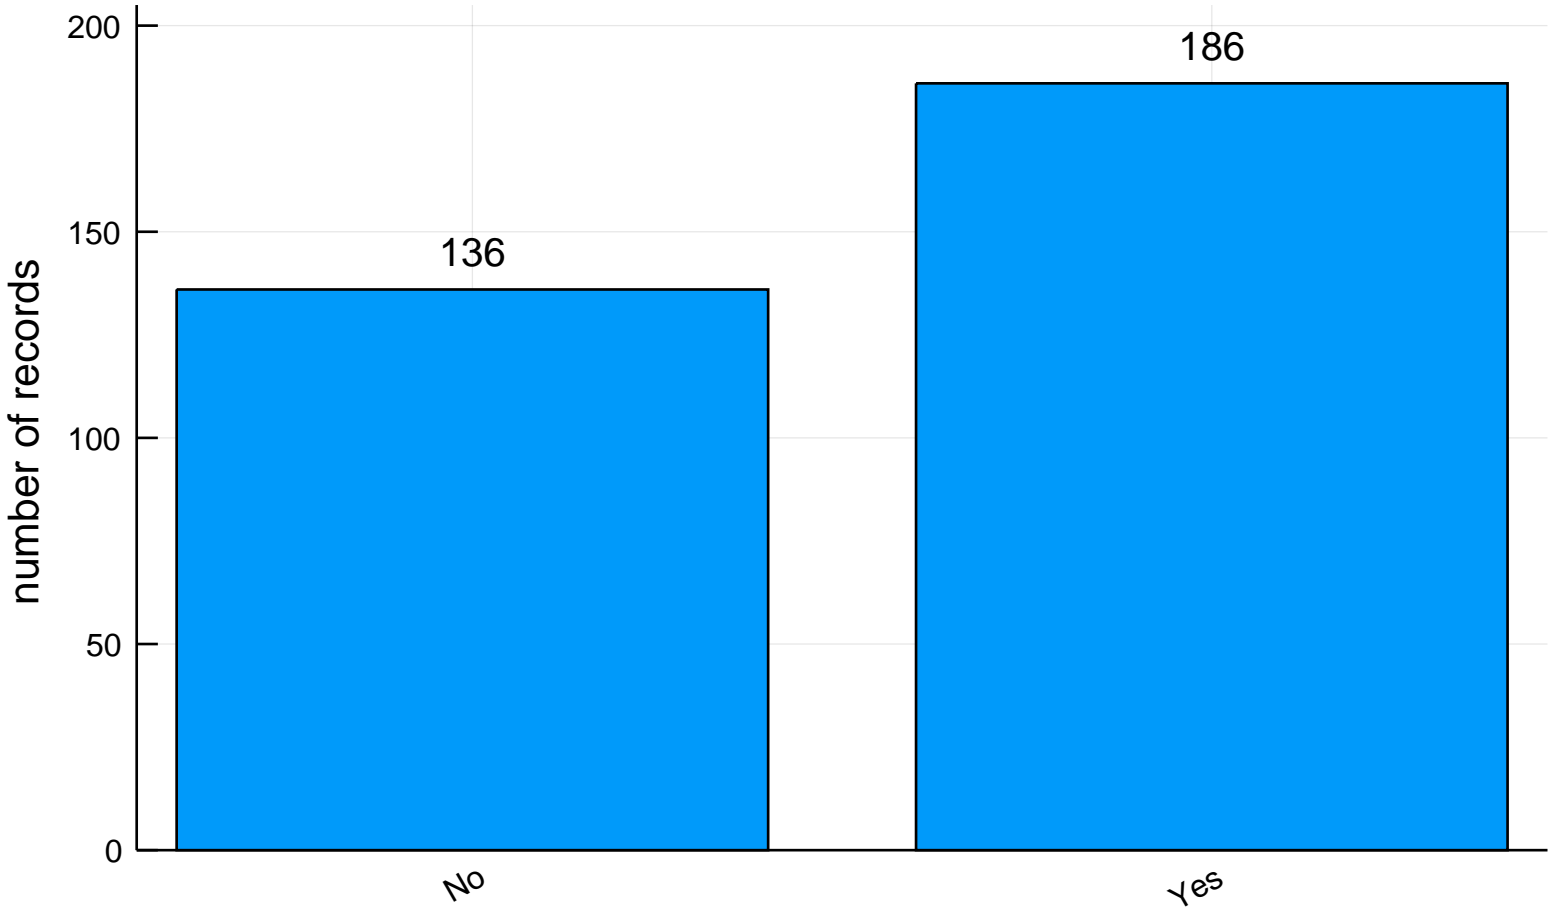

6275 NAs

# Water (per site\_sub\_coll)

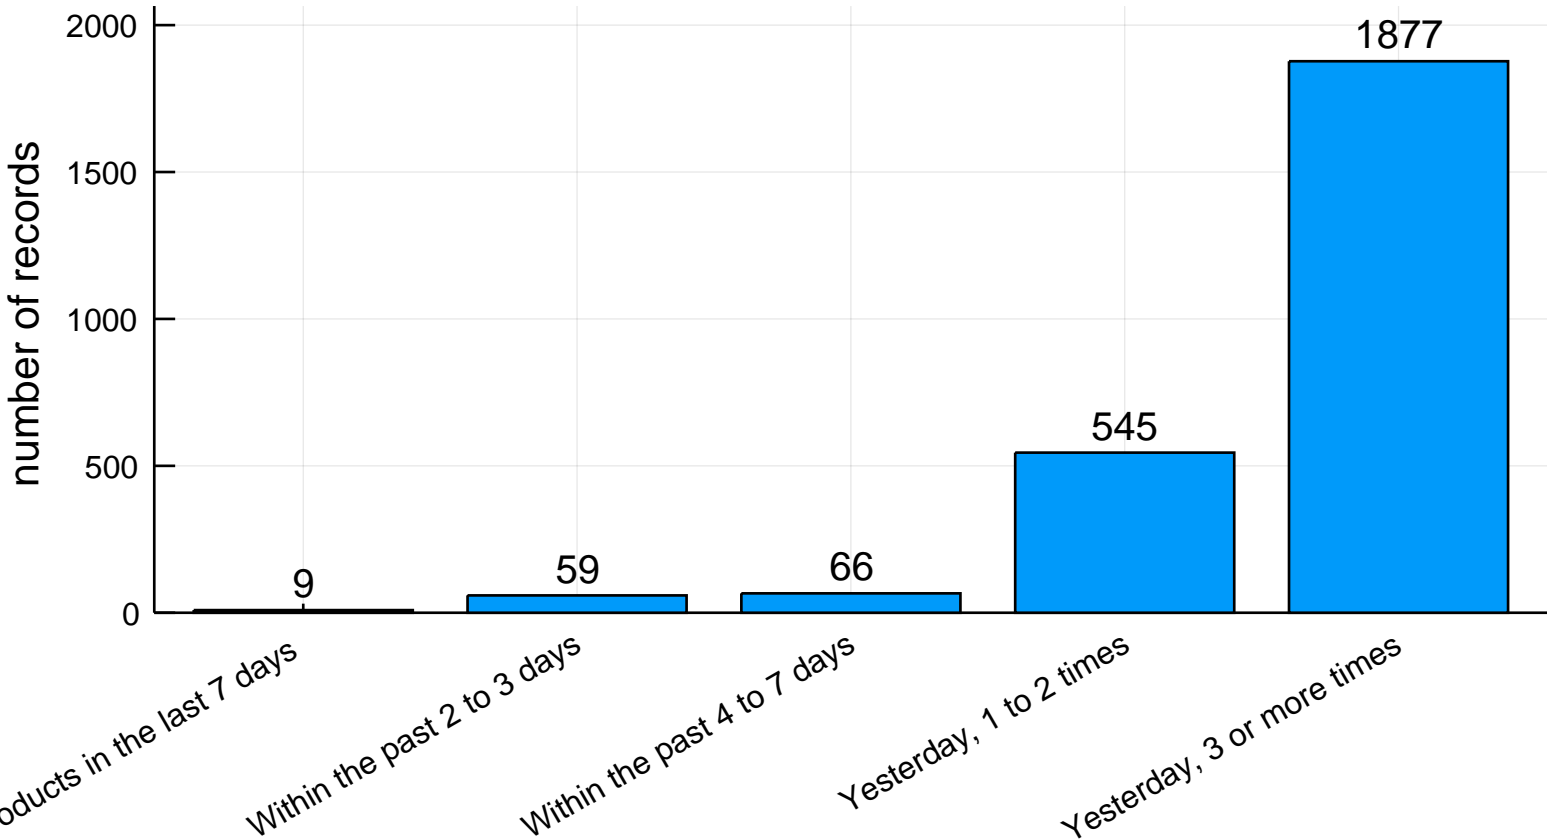

742 NAs

# Water based pick jet (per Participant\_ID)

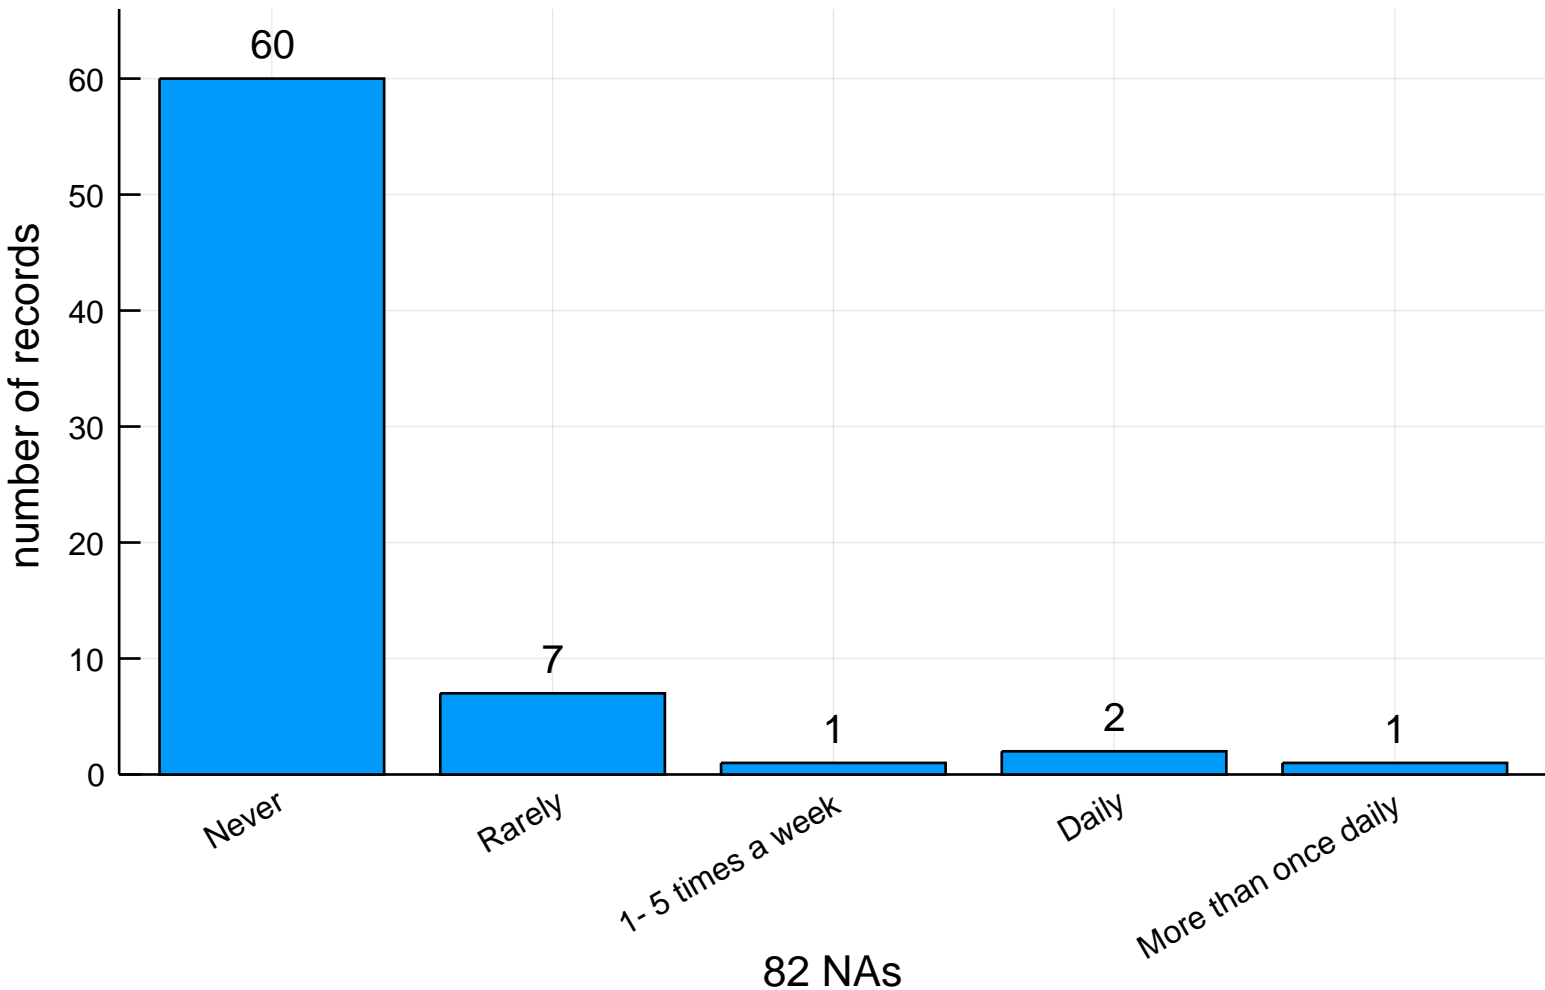

week num (per site\_sub\_coll)

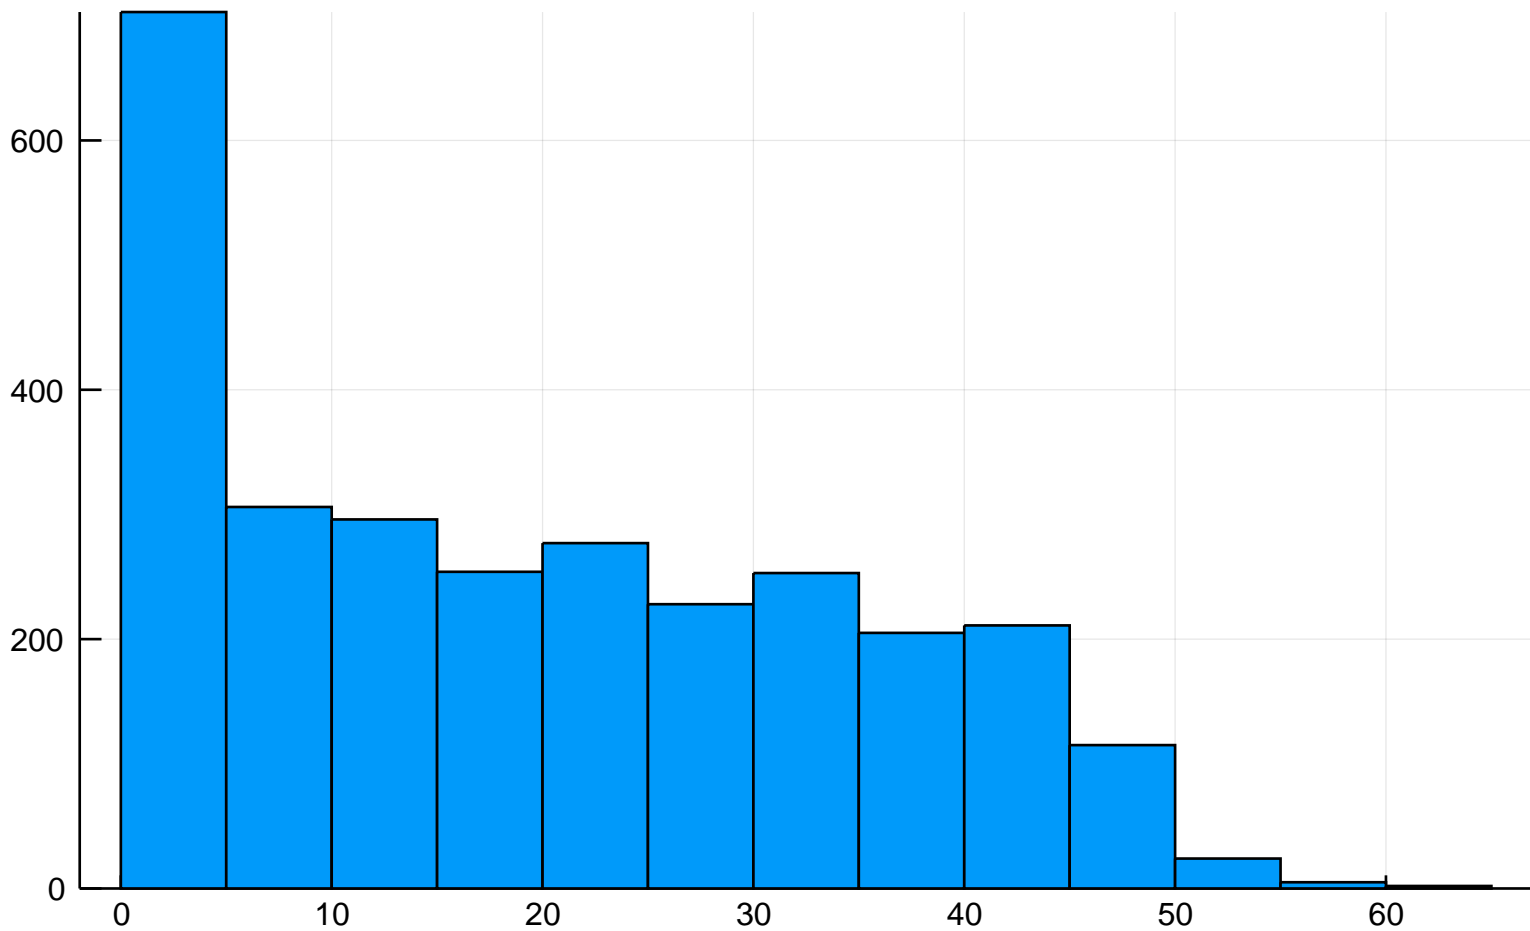

Mean: 18.93, stdev: 15.04

# Weight (per site\_sub\_coll)

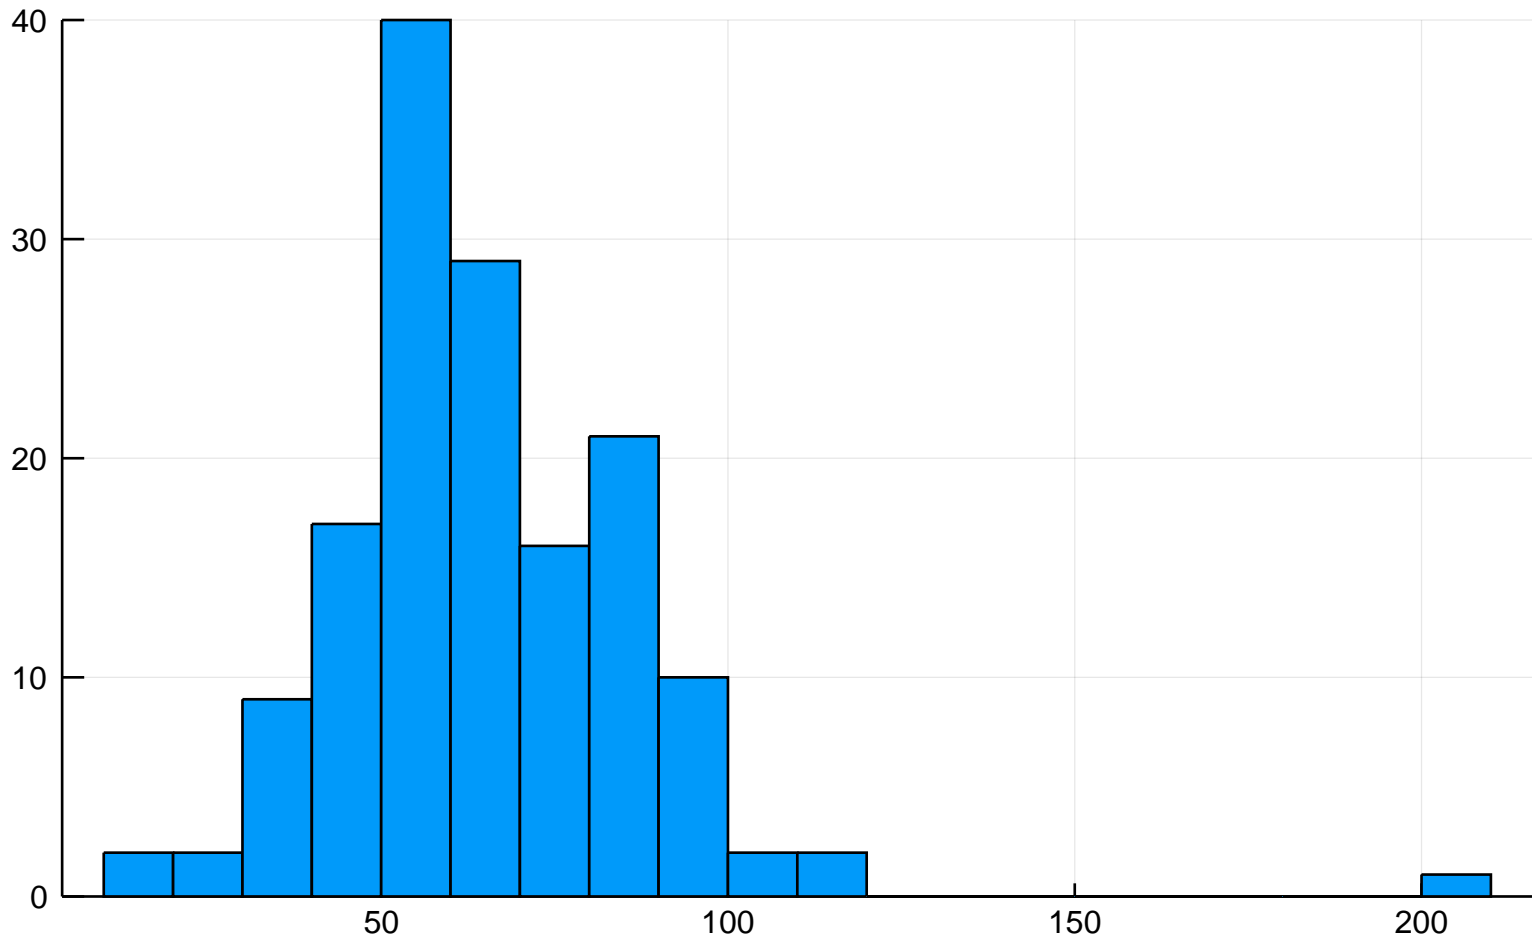

Mean: 64.83, stdev: 21.59

# Weight 1 (per Participant\_ID)

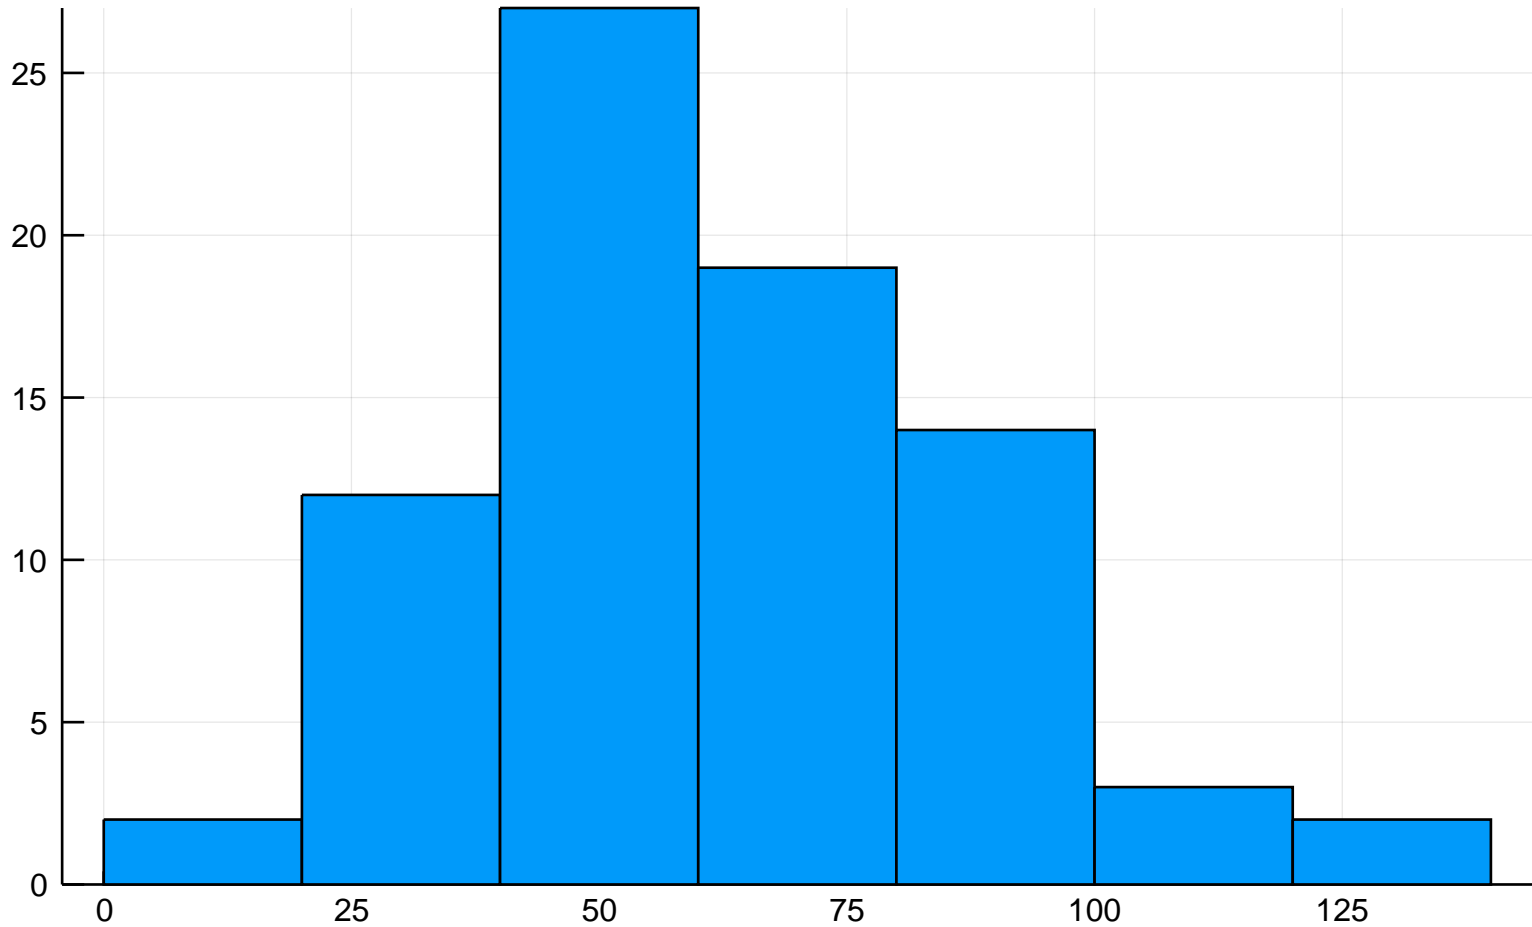

Mean: 62.74, stdev: 23.83



# Were you born in a hospital (per Participant\_ID)

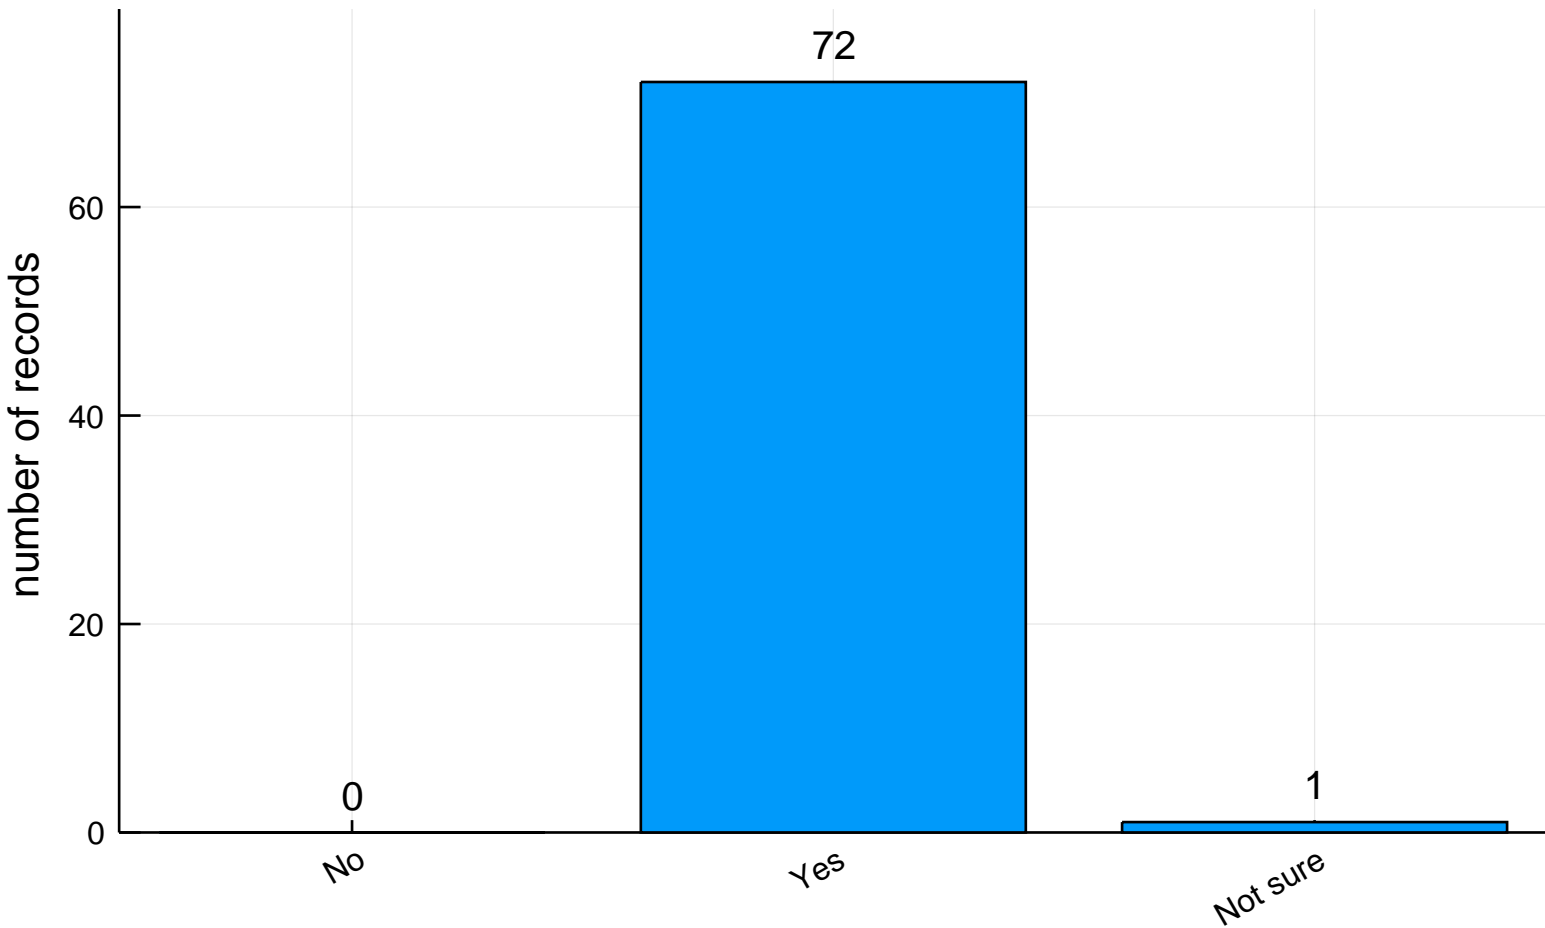

80 NAs

# Were you born in the United States (per Participant\_ID)

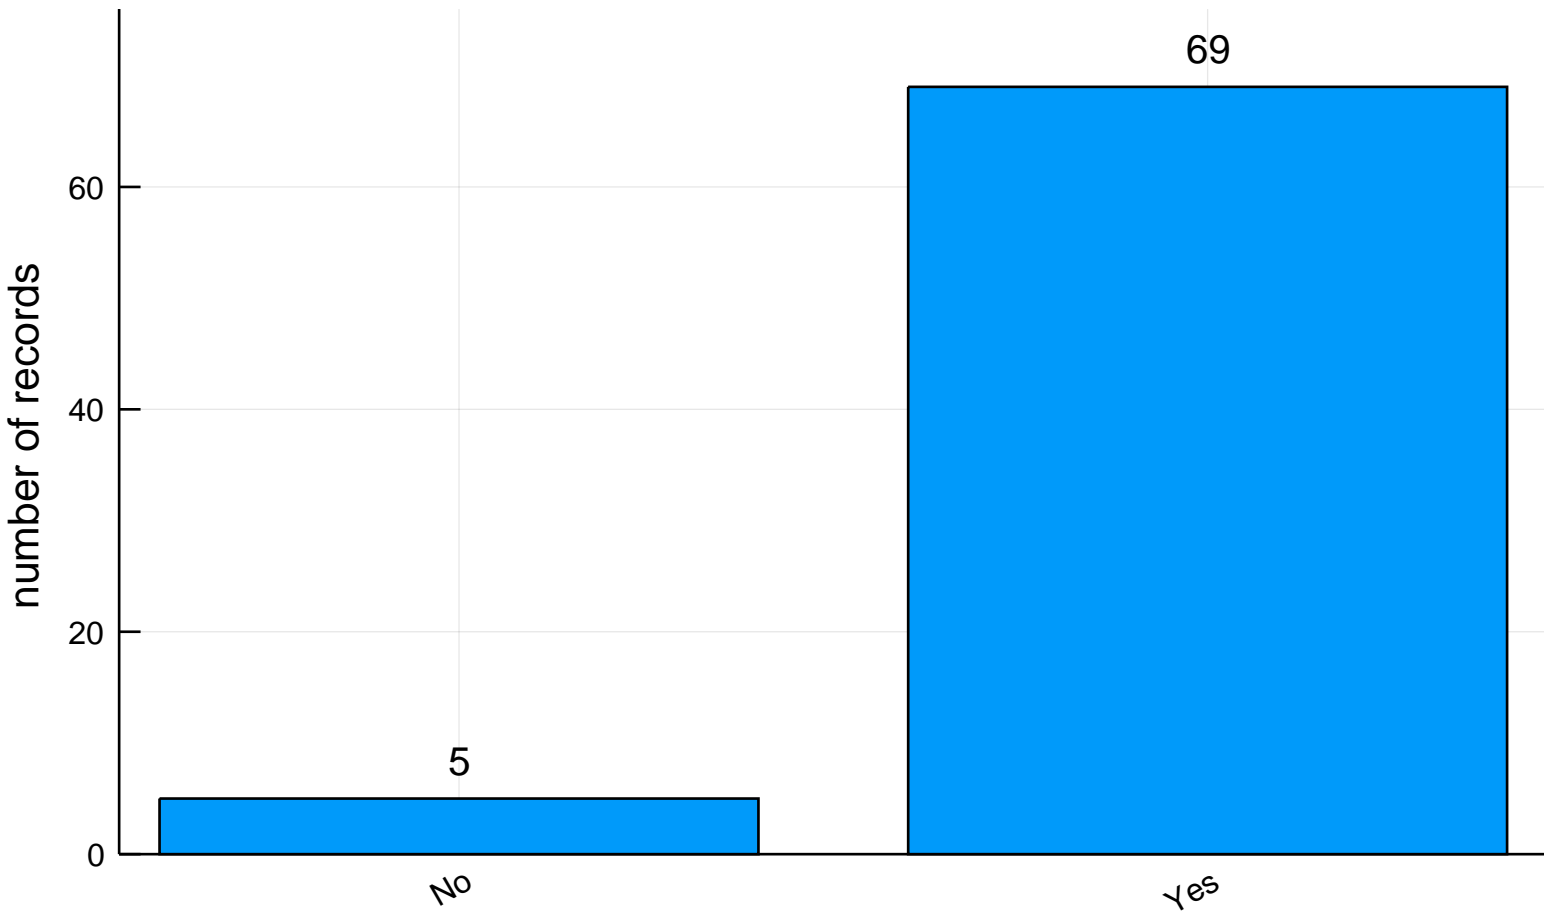

79 NAs

Were you born prematurely more than 3 we (per Participant\_ID

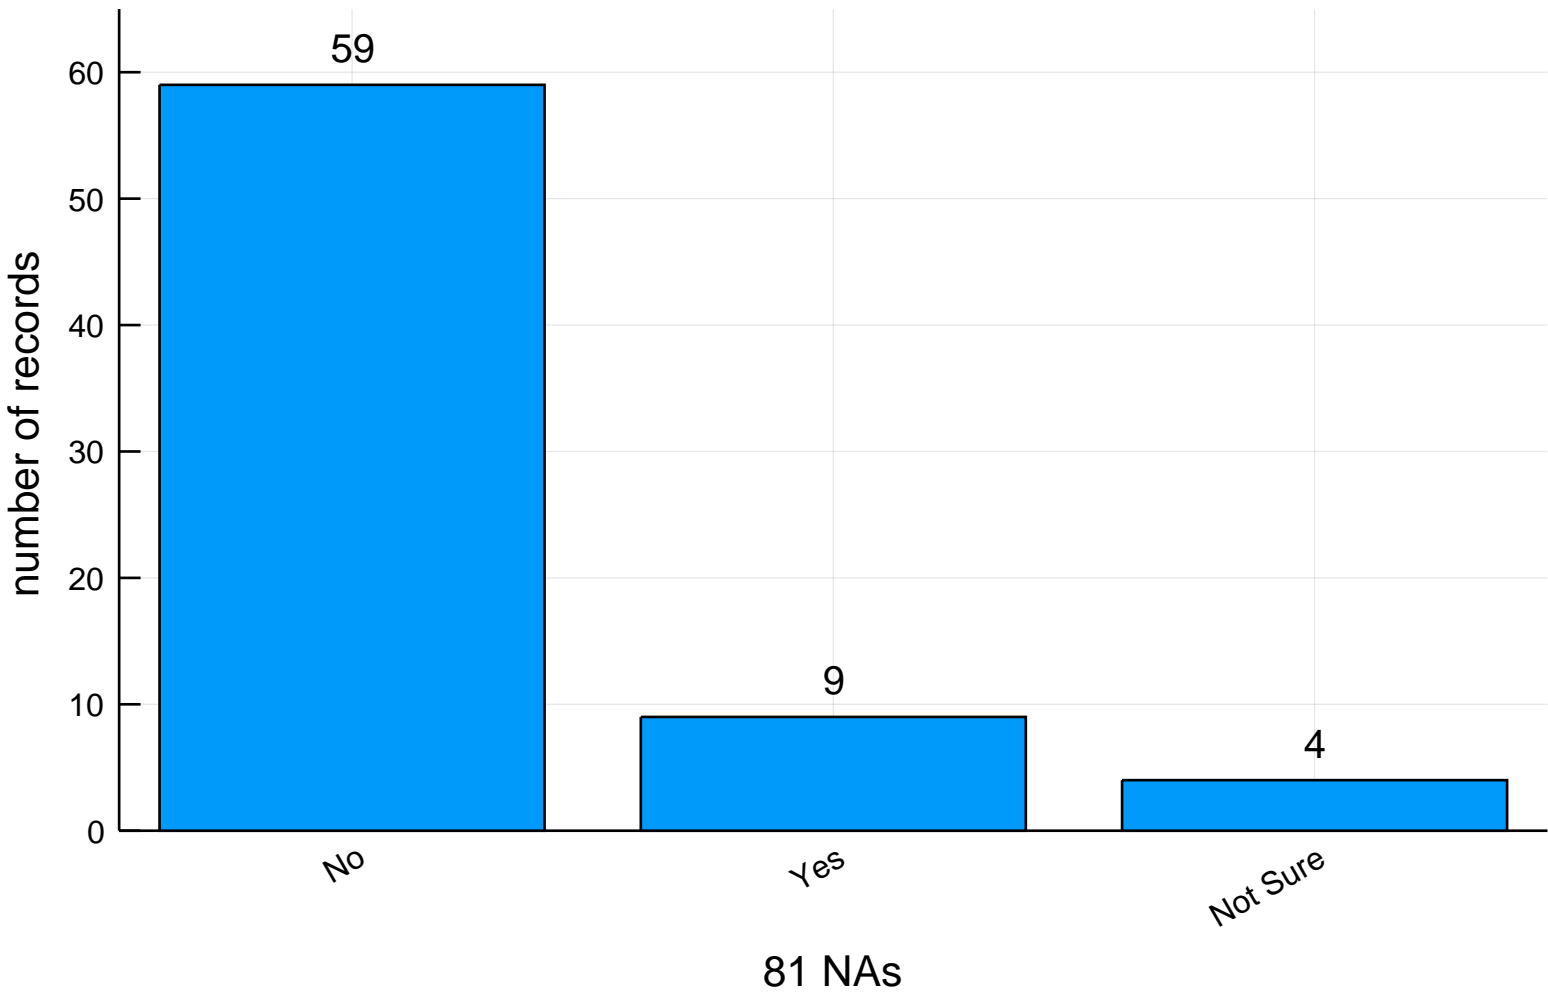

# Were you born via C section (per Participant\_ID)

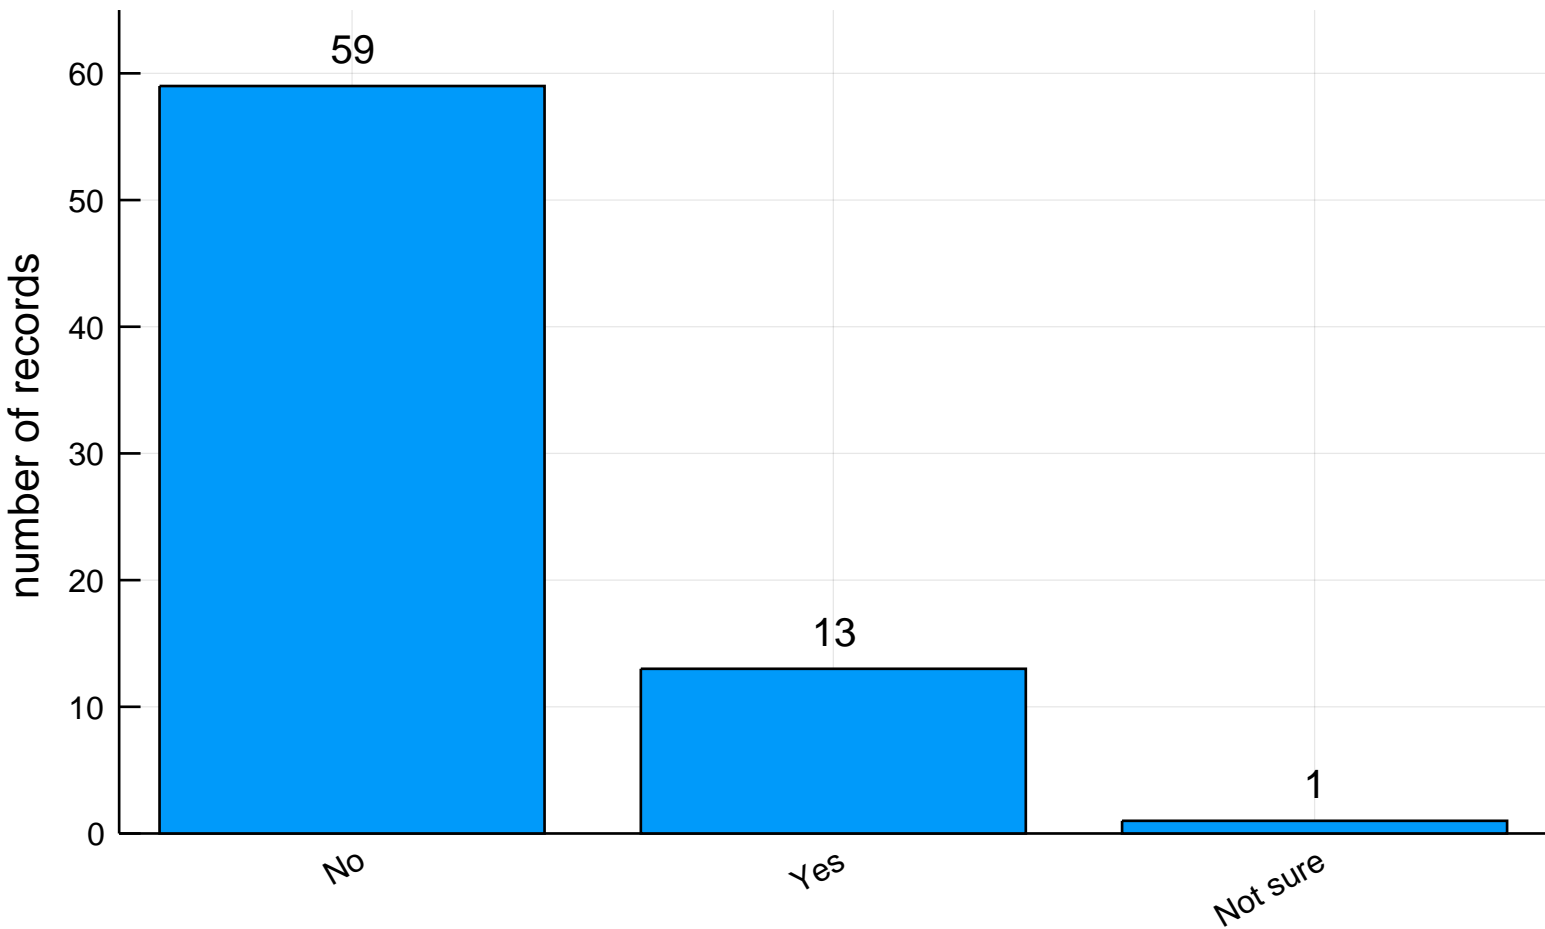

80 NAs

# Were you breastfed as an infant (per Participant\_ID)

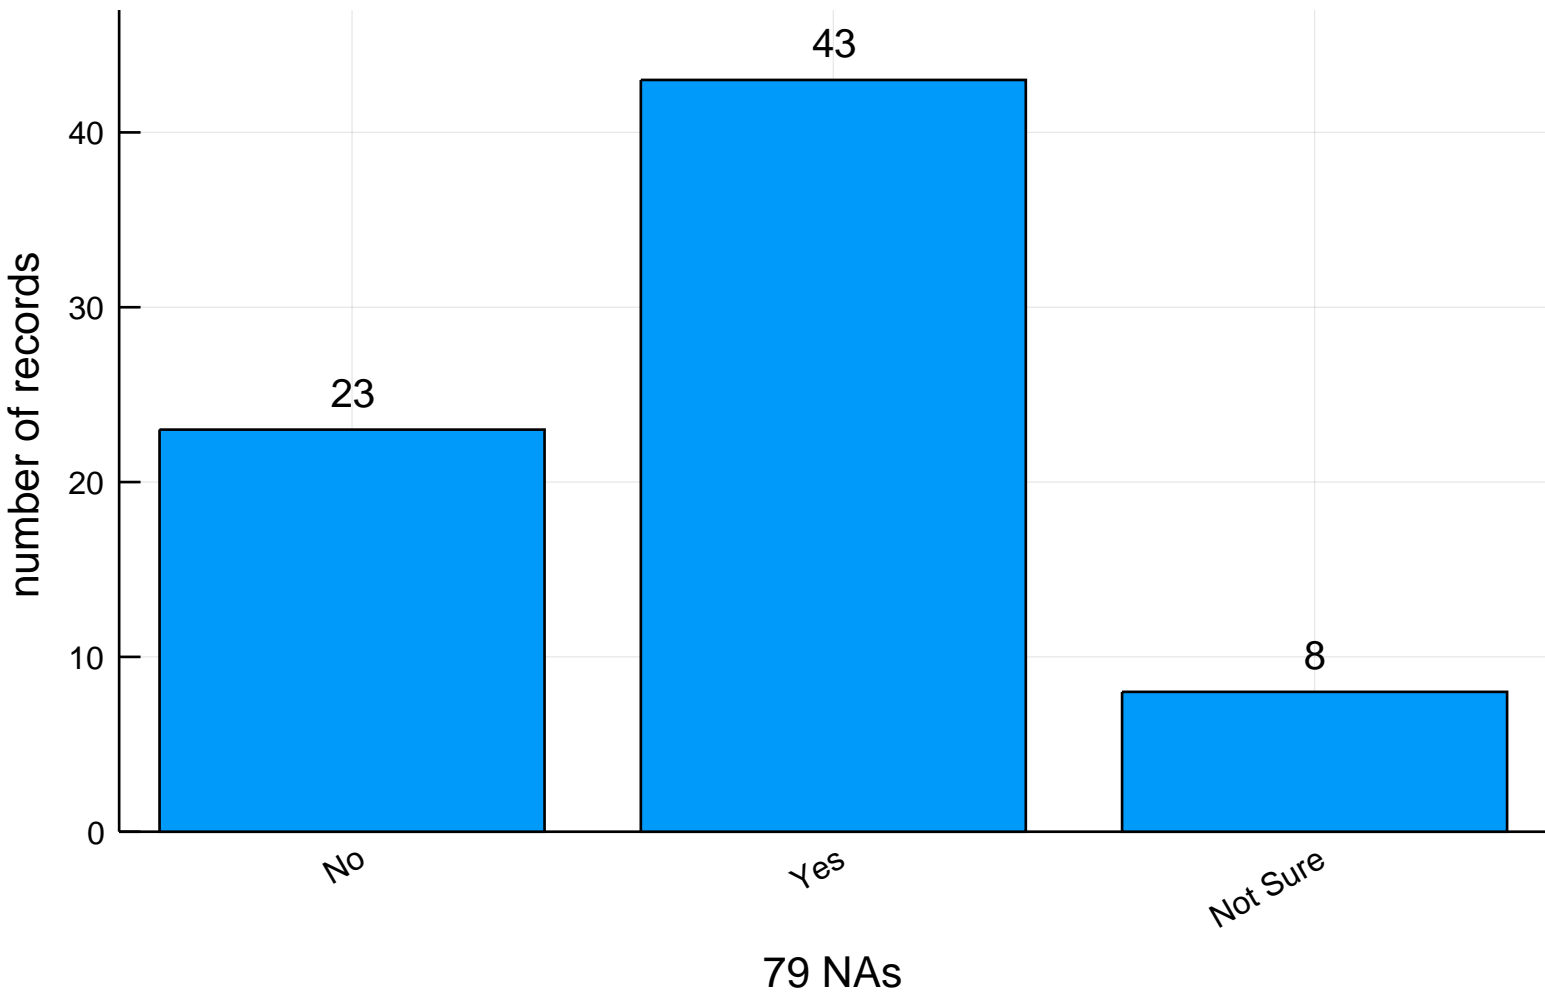

Were you exposed to cigarette smoke as a (per Participant\_ID

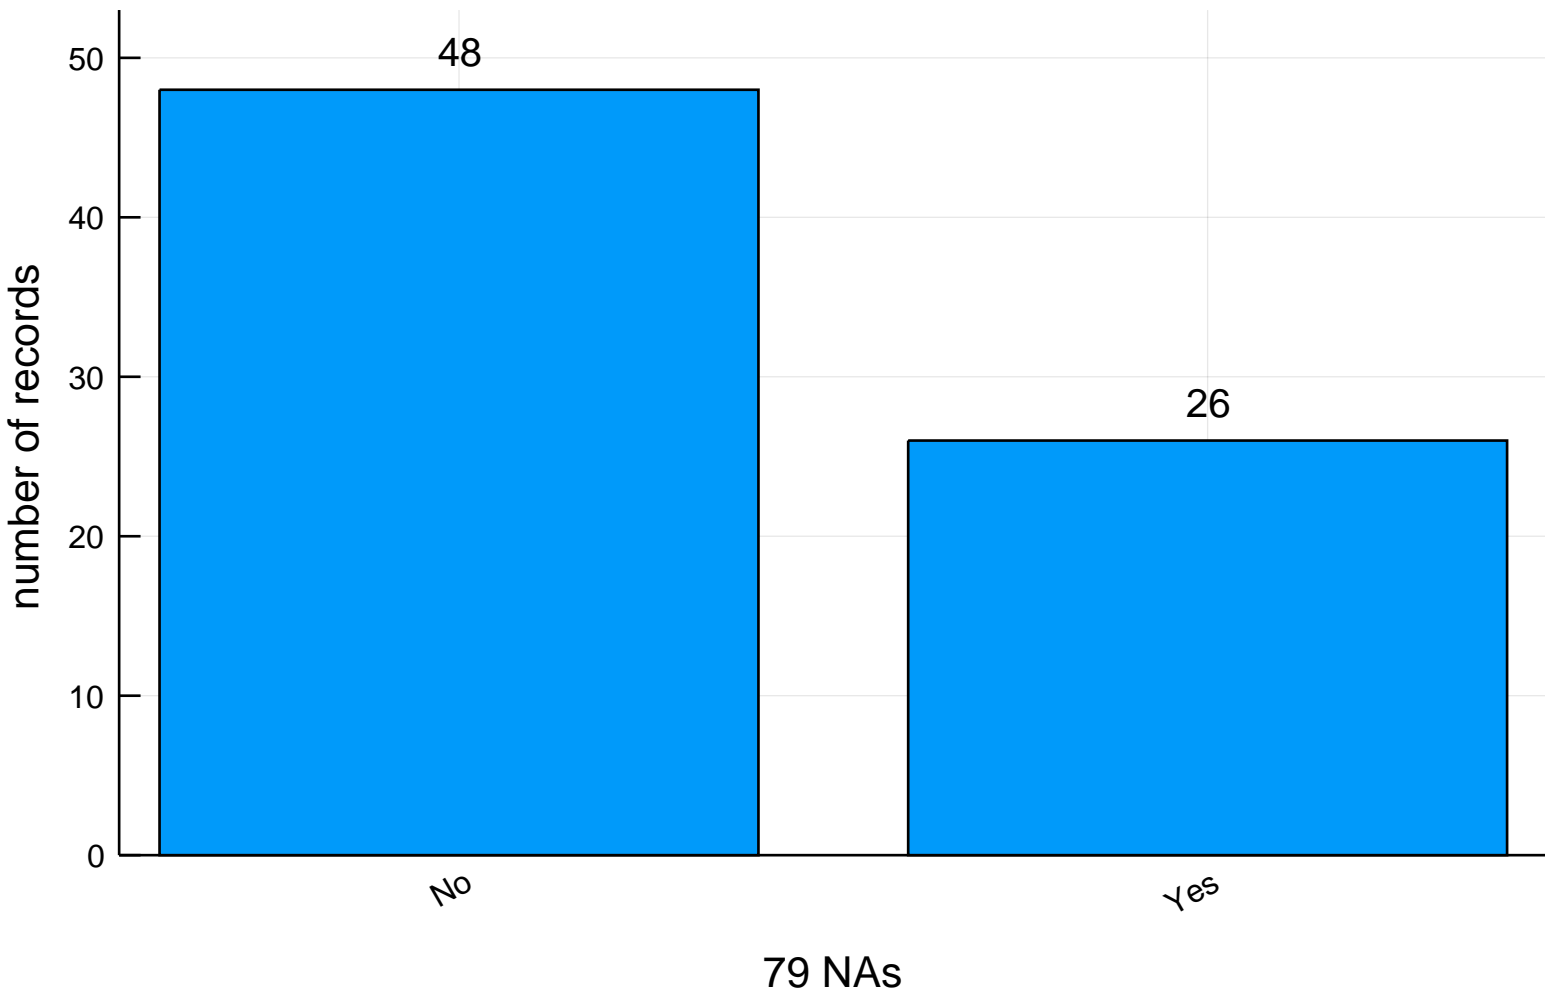

Were you hospitalized before the age of (per Participant\_ID)

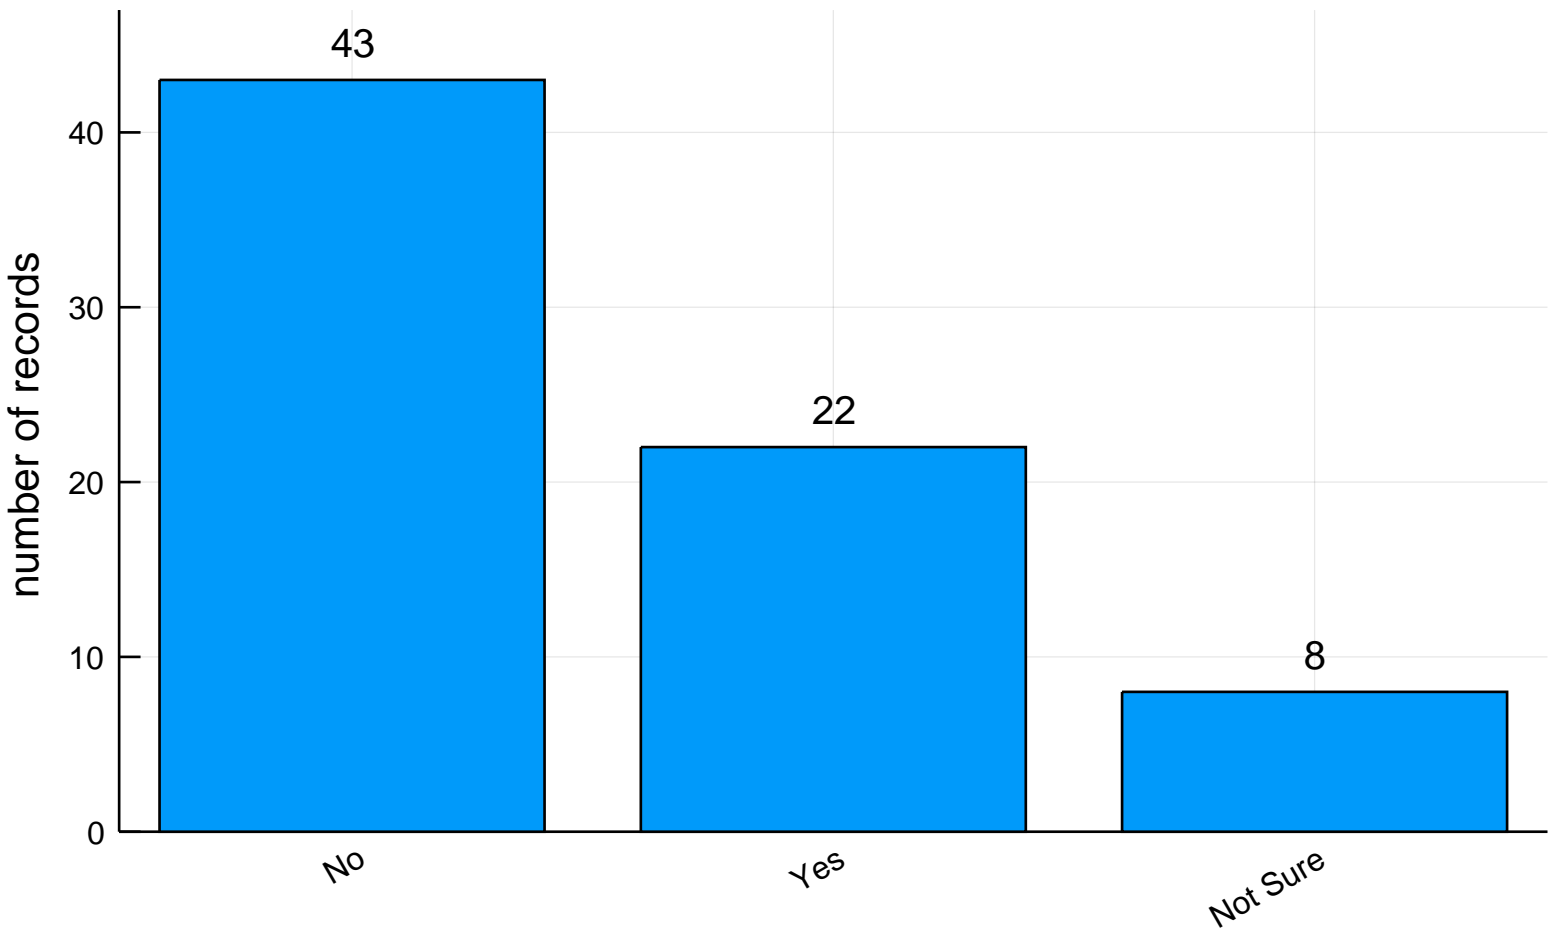

80 NAs

# Were you treated with antibiotics before (per Participant\_ID)

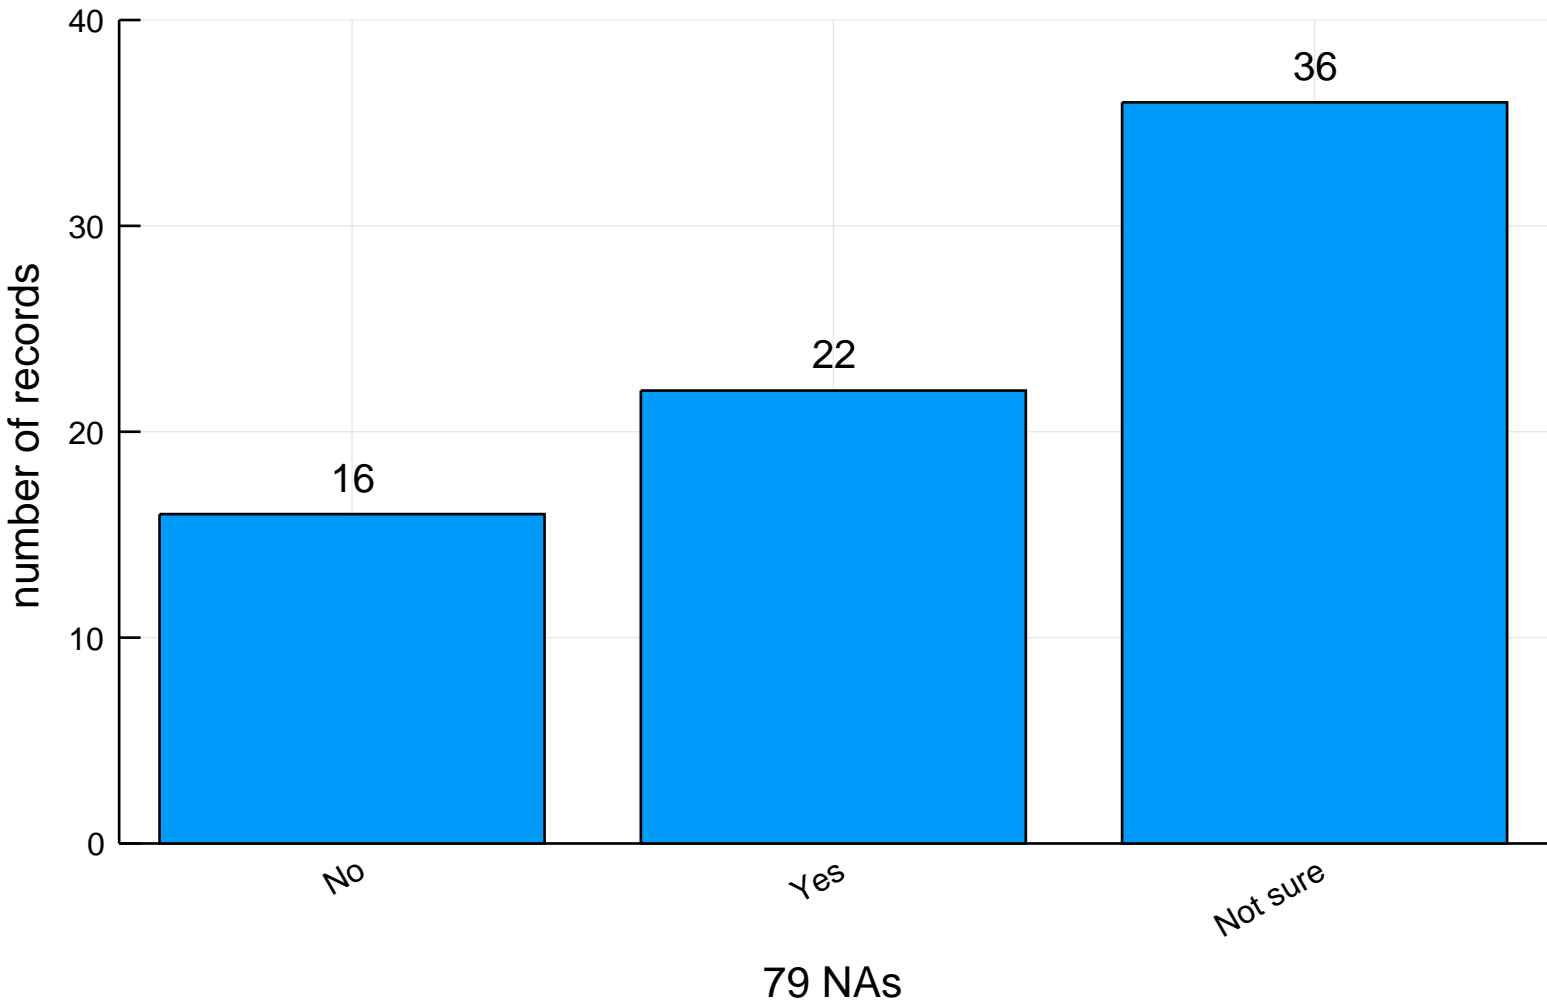



# What are your dietary preferences with r (per Participant\_ID)

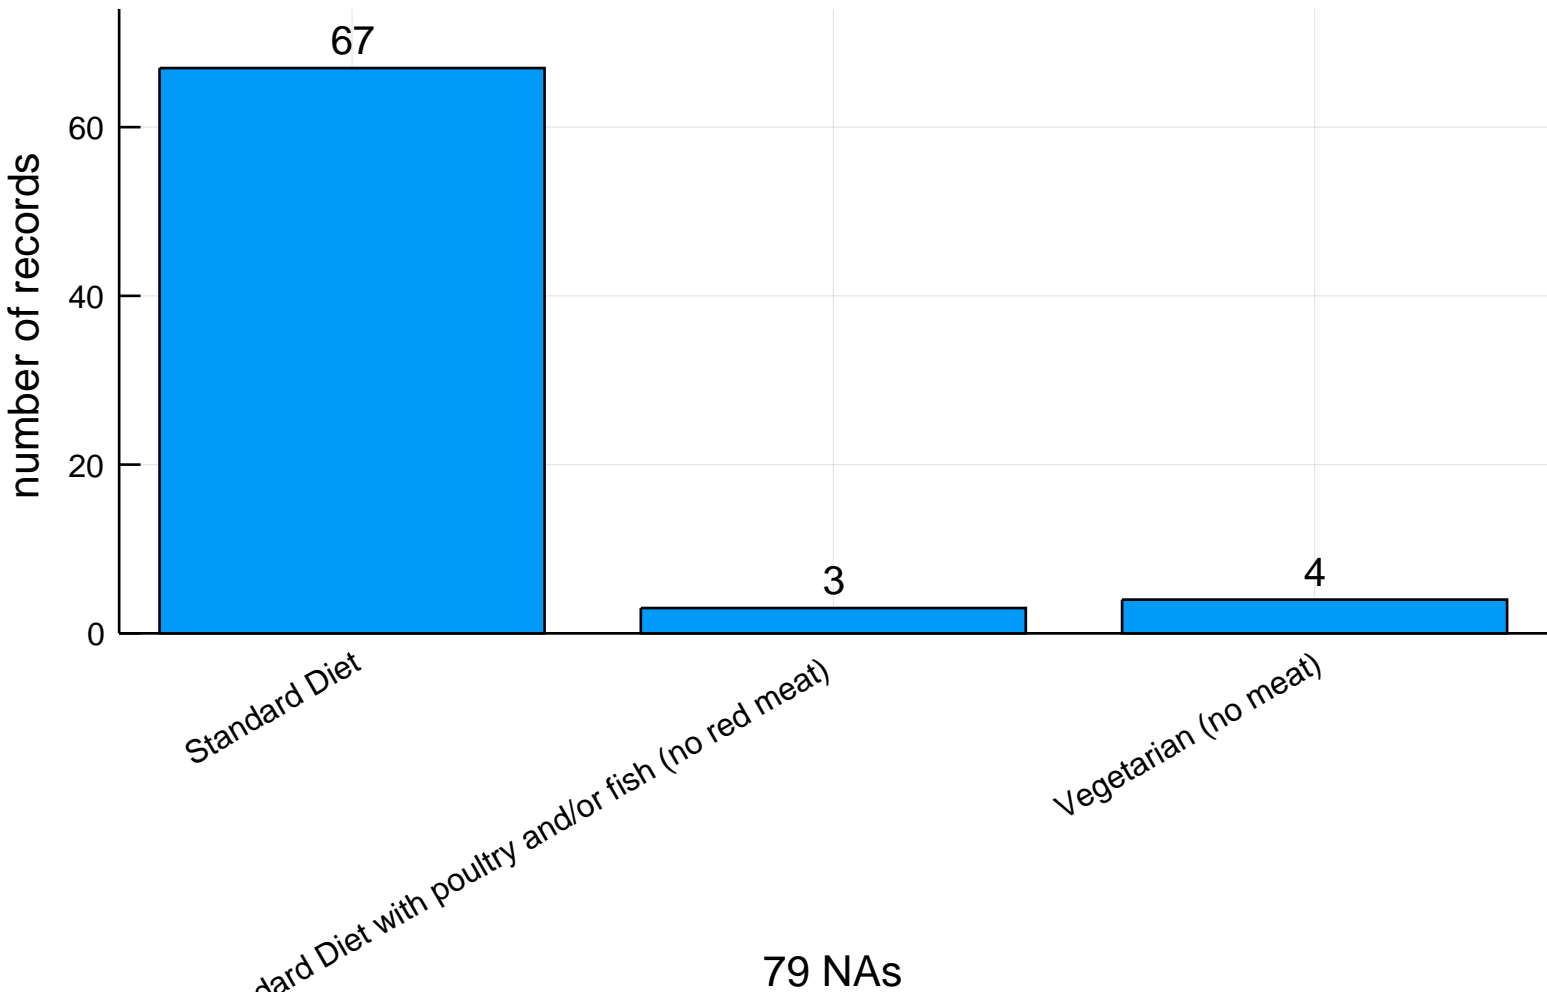

# What is the endoscopic grading of severi (per site\_sub\_coll)

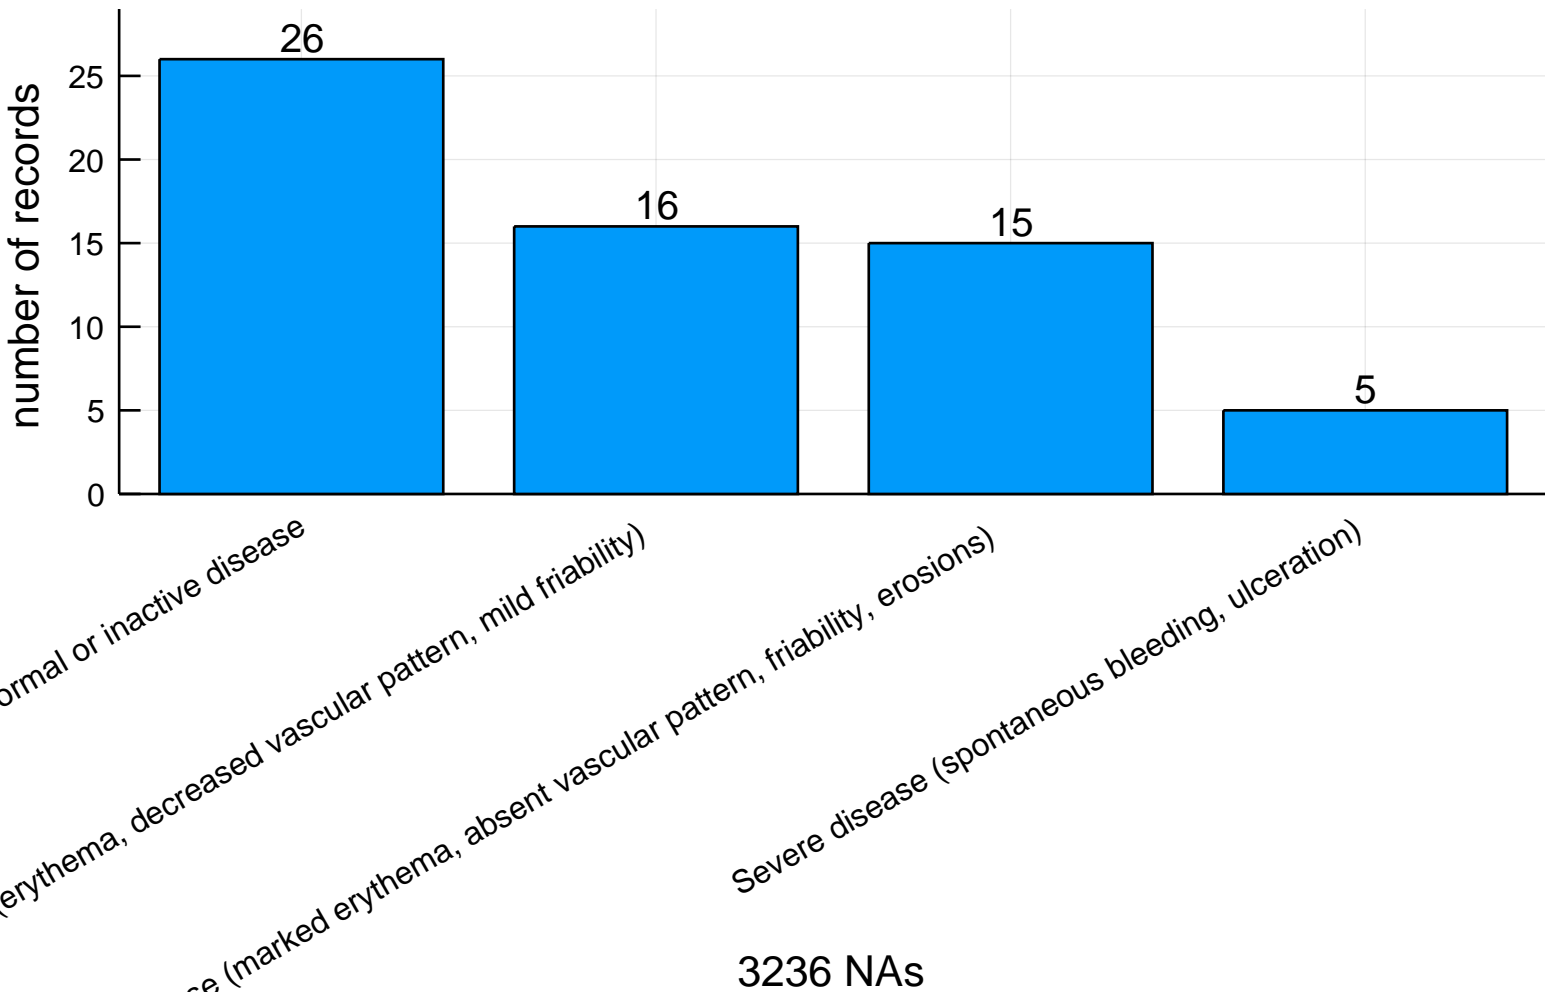

3236 NAs

# What is the endoscopic grading of severi (per site\_sub\_coll)

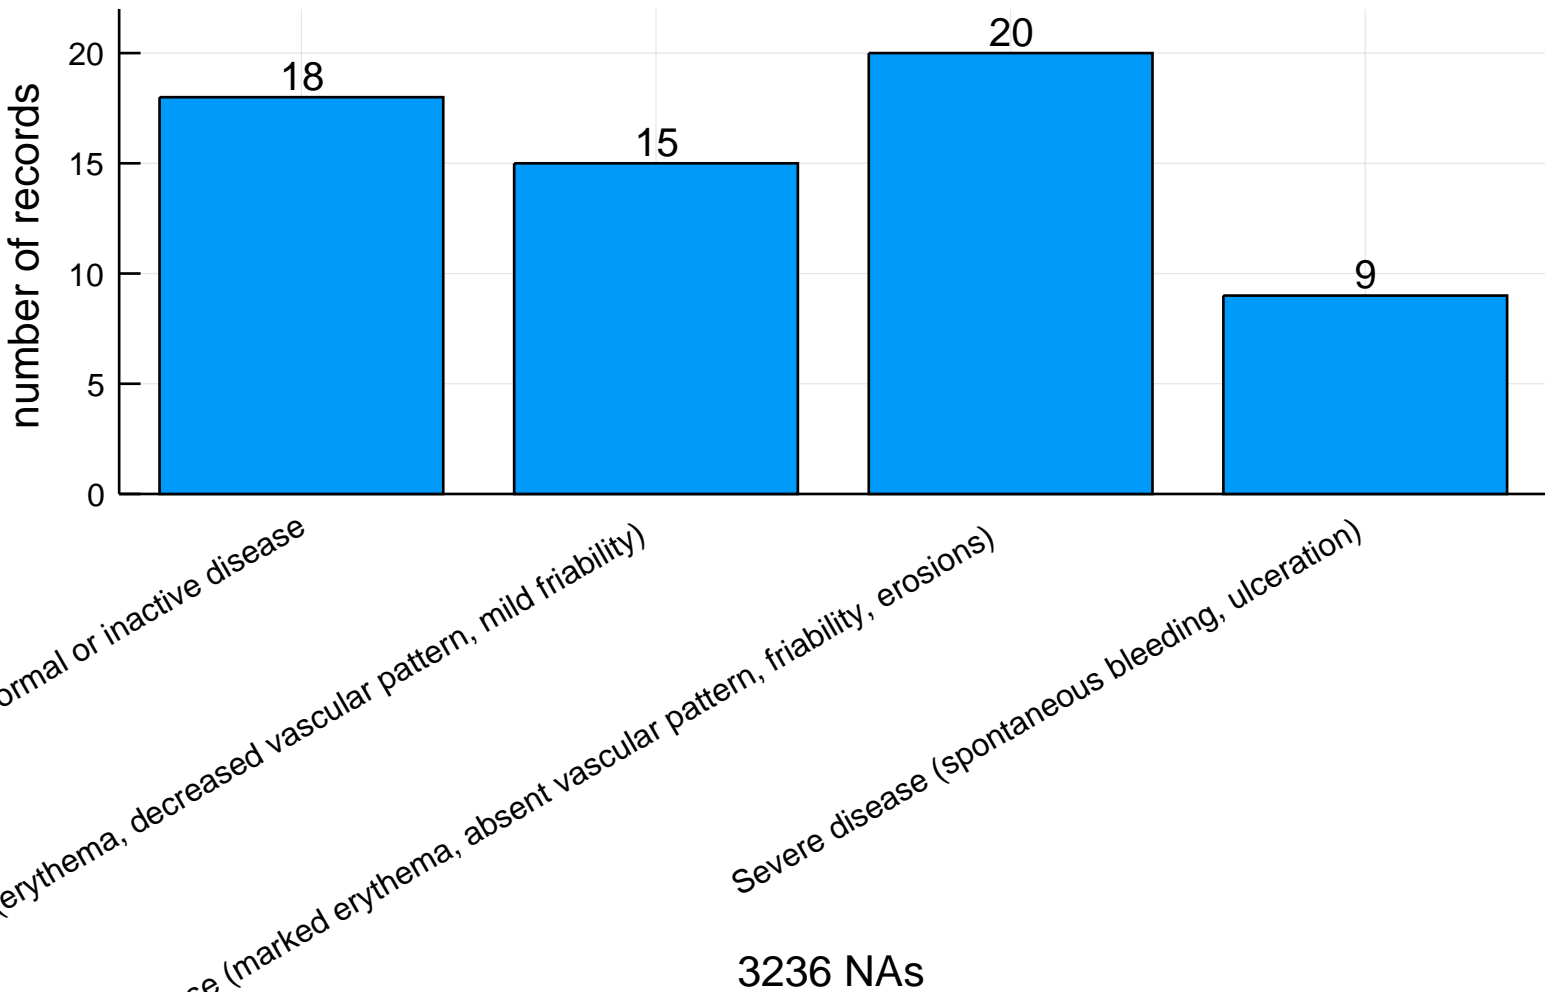

# What is the endoscopic grading of severi (per site\_sub\_coll)

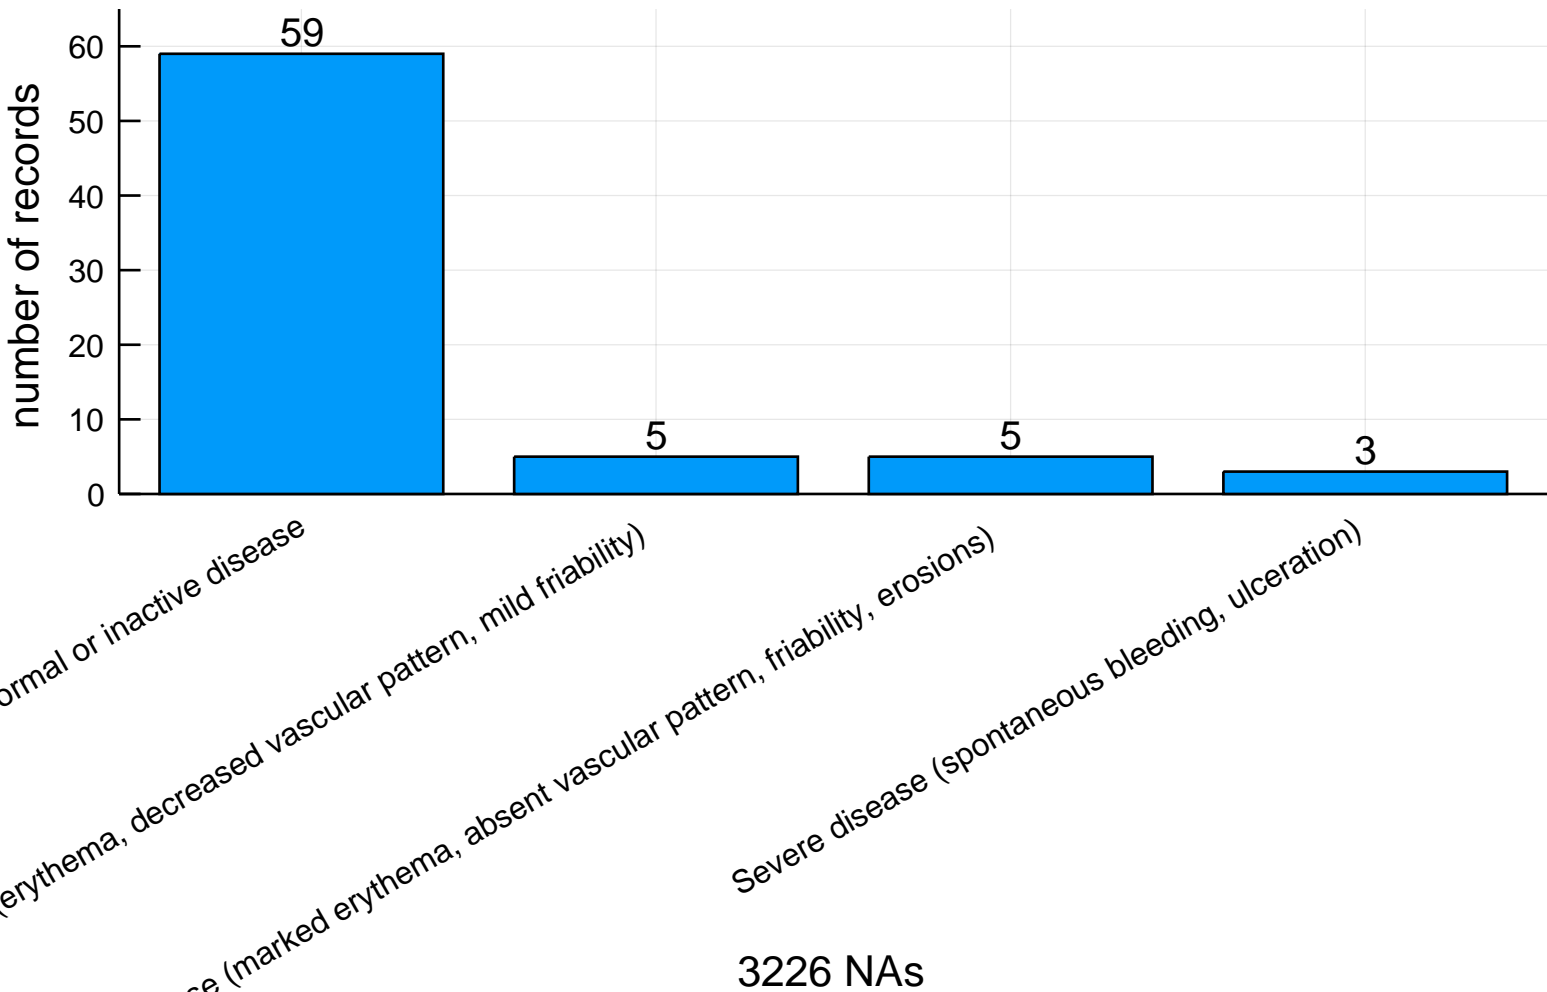

# What is the endoscopic grading of severi (per site\_sub\_coll)

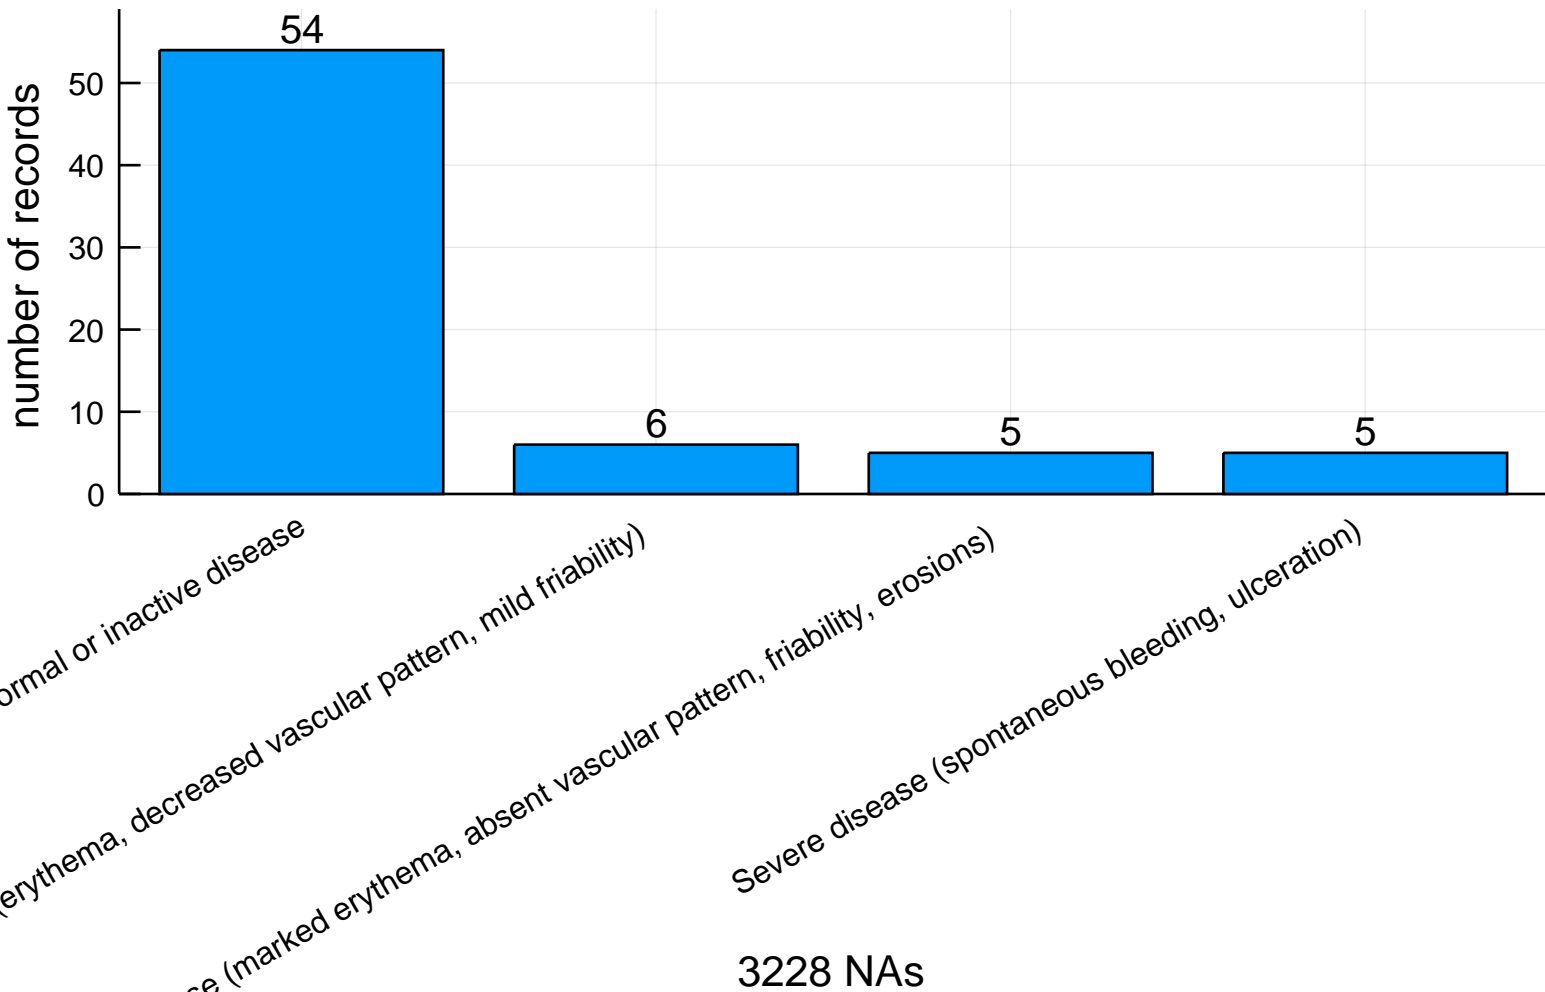

# What is the endoscopic grading of severi (per site\_sub\_coll)

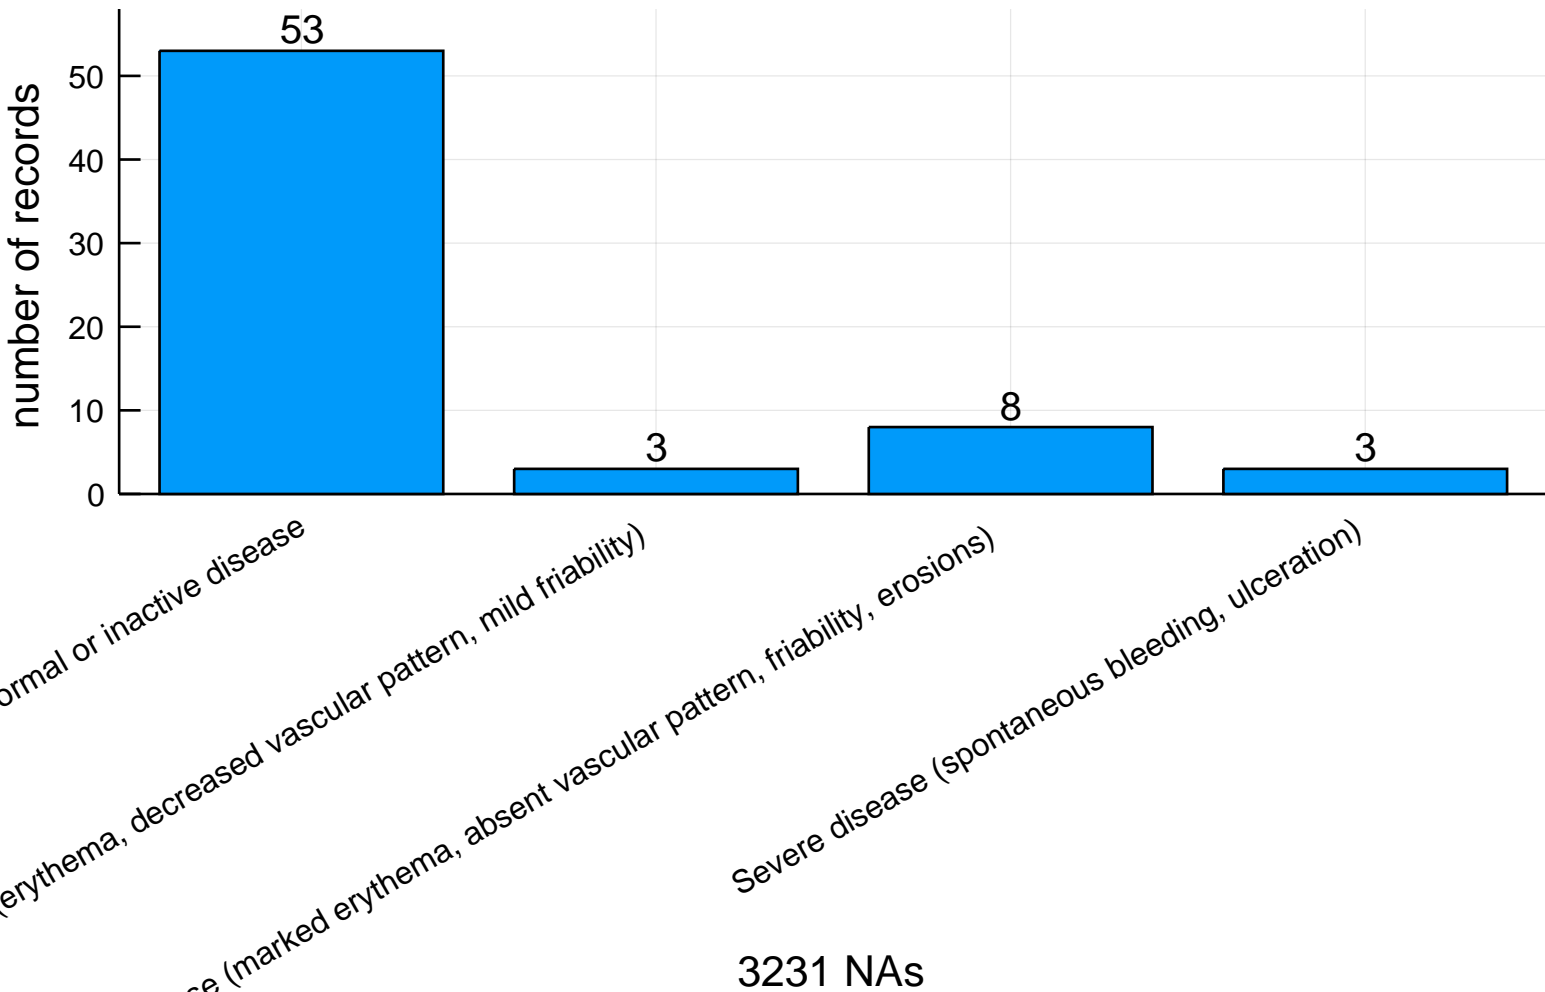

# When was the last time you had a dental (per Participant\_ID)

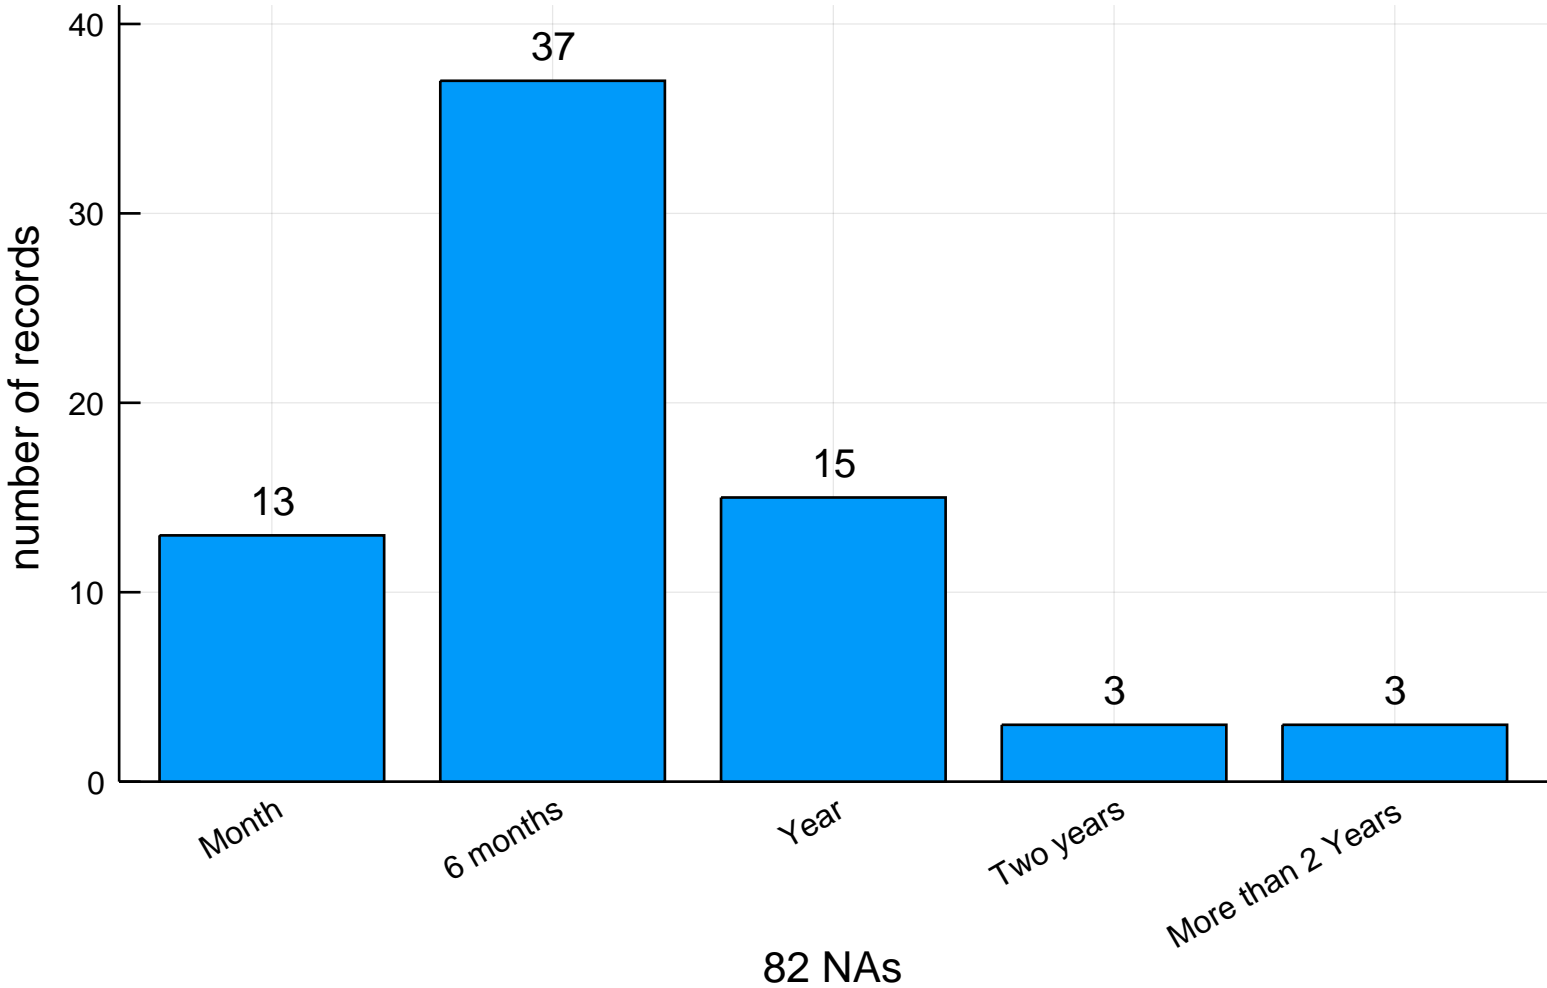

# When was the last time you saw a dentist (per Participant\_ID)

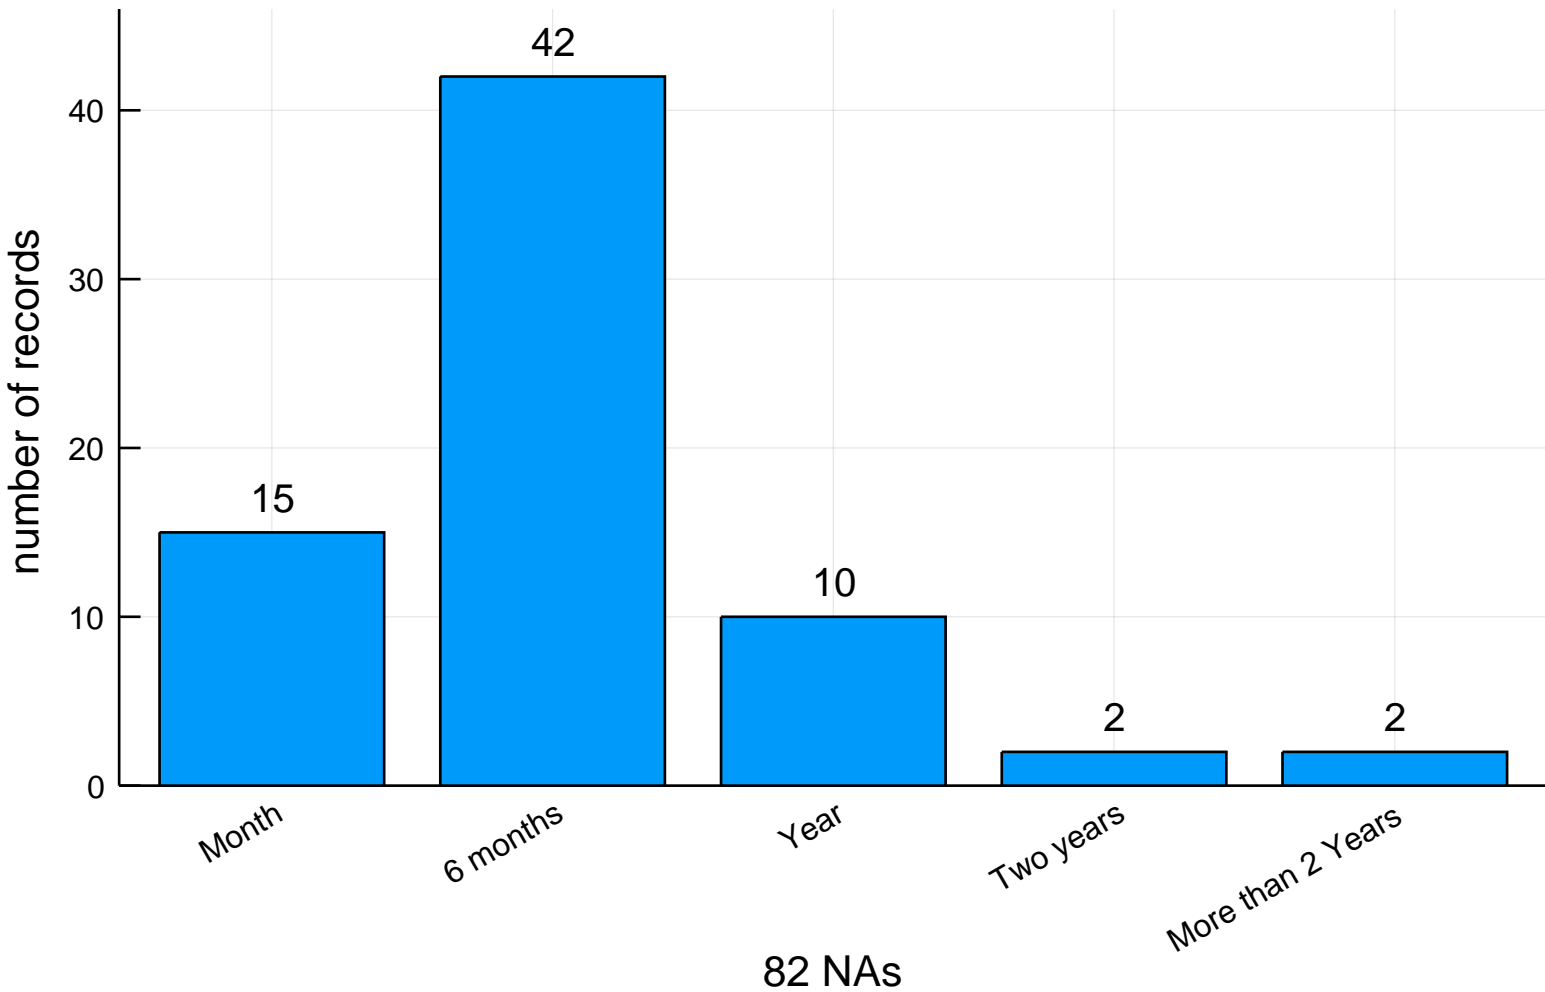



# White meat chicken turkey etc (per site\_sub\_coll)

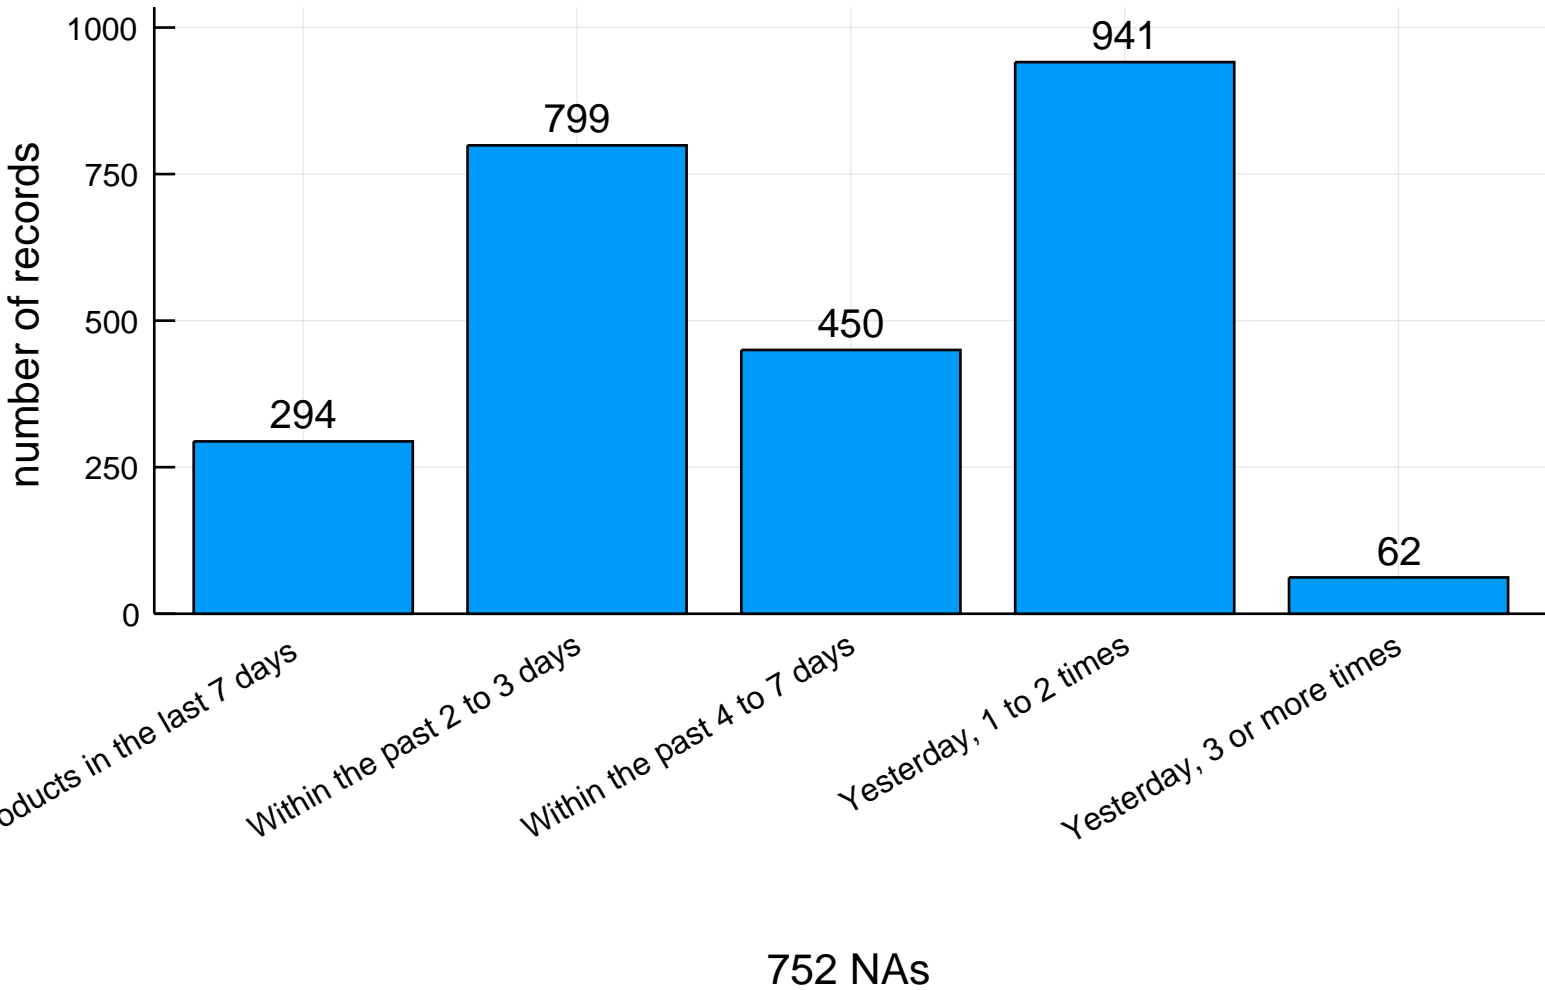

# Whole grains wheat oats brown rice rye q (per row)

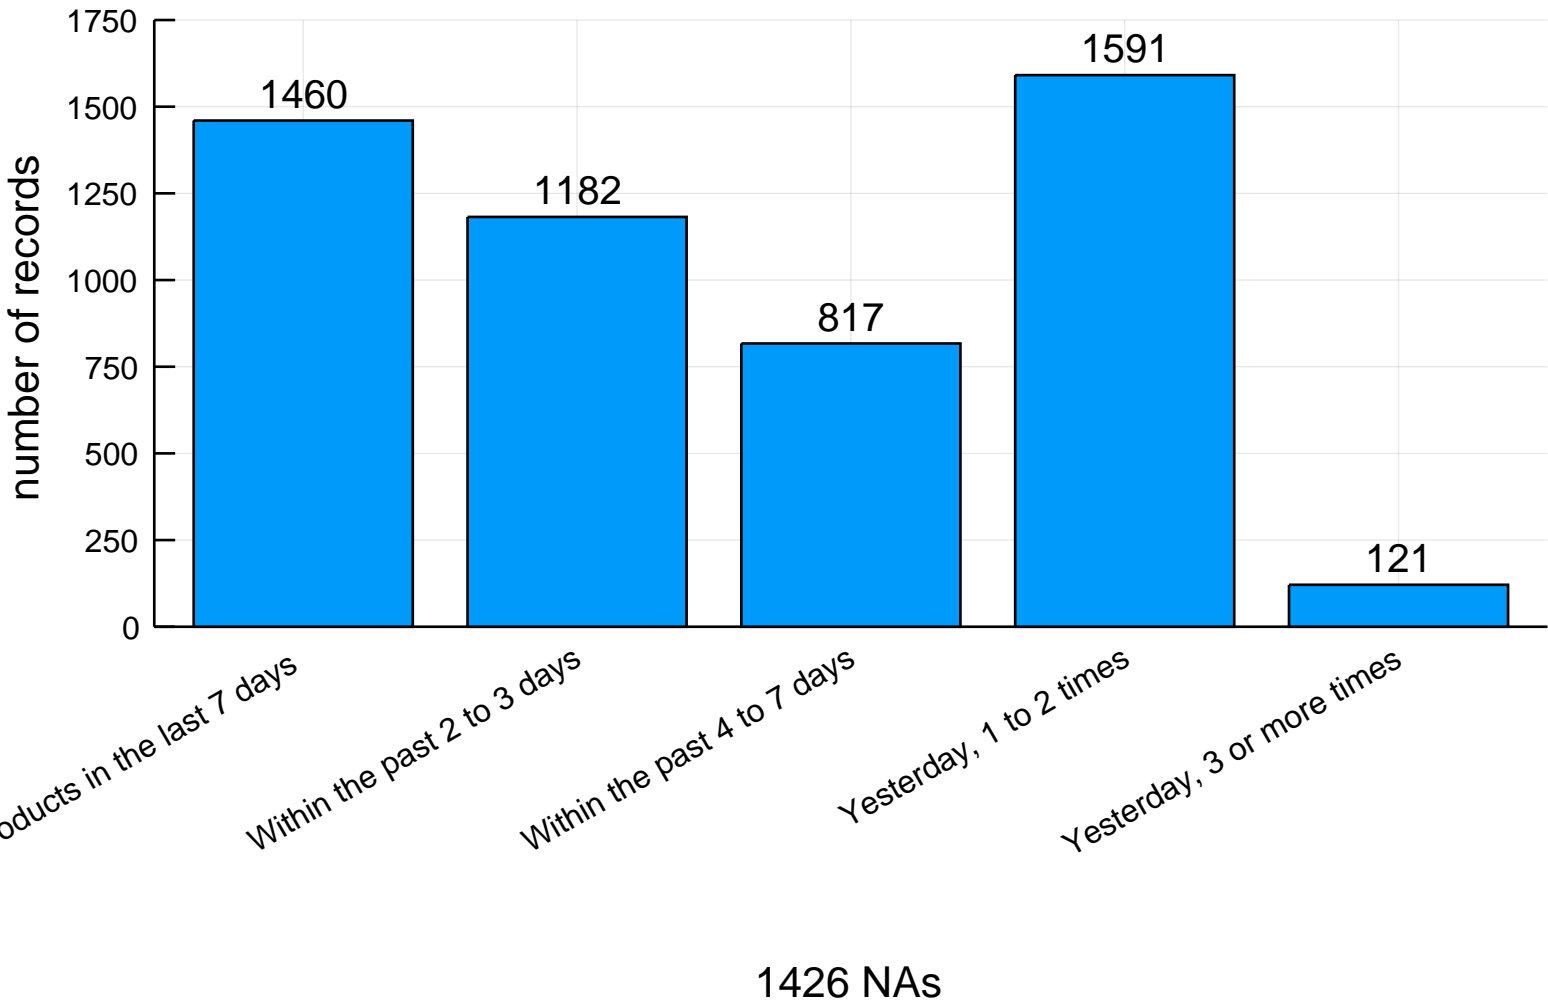

# WR ID (per row)

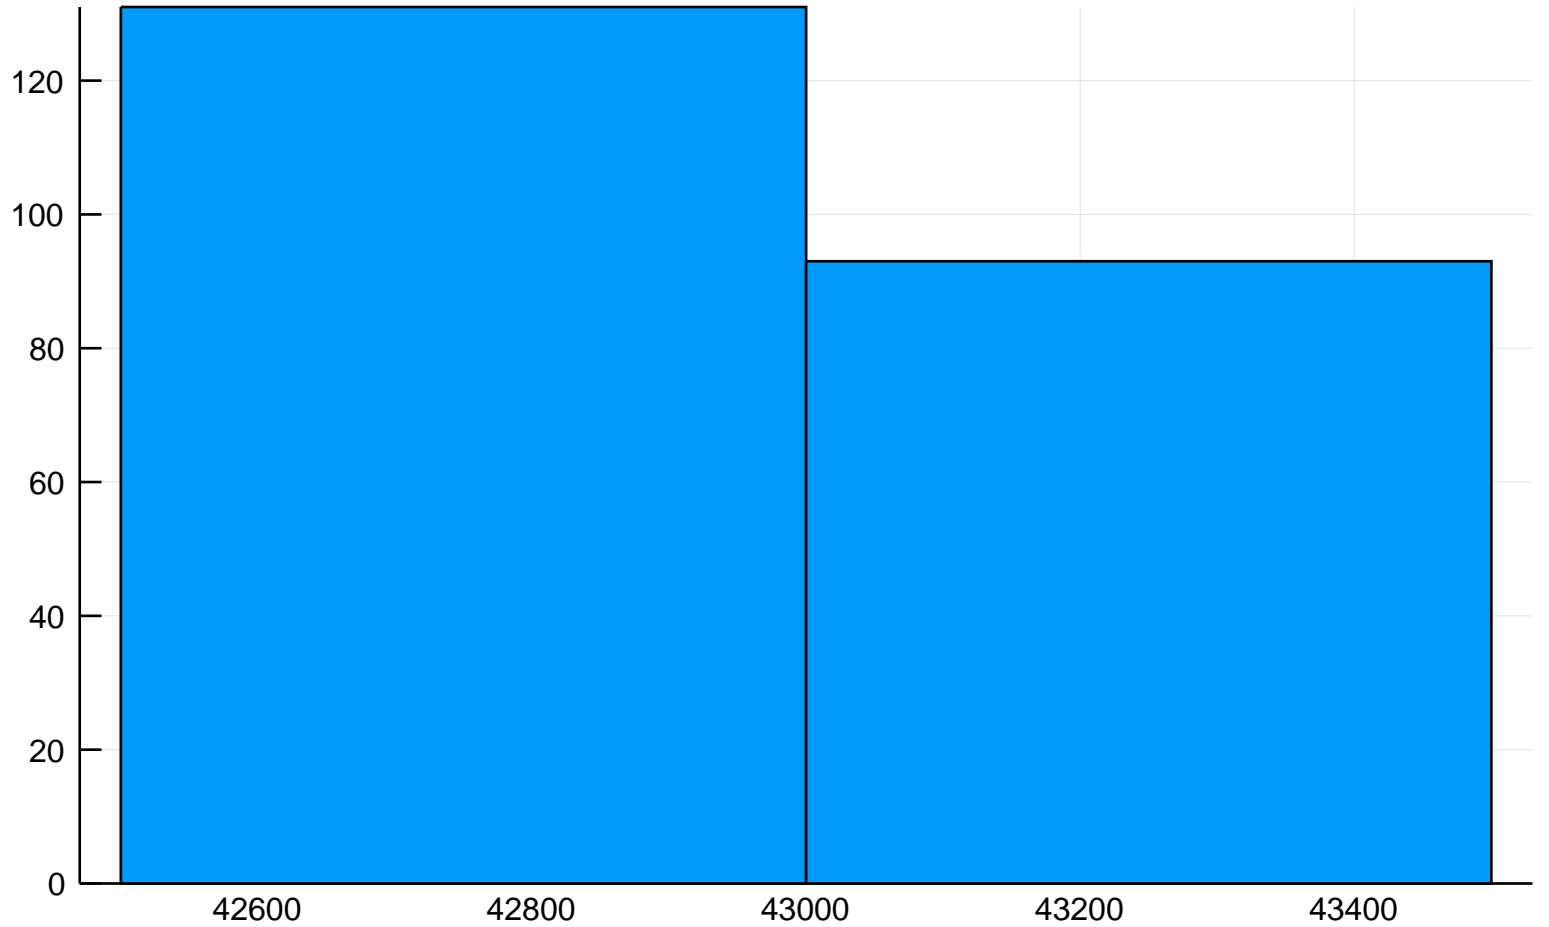

Mean: 42925.94, stdev: 434.95

# x1 Feeling of fatigue (per Participant\_ID)

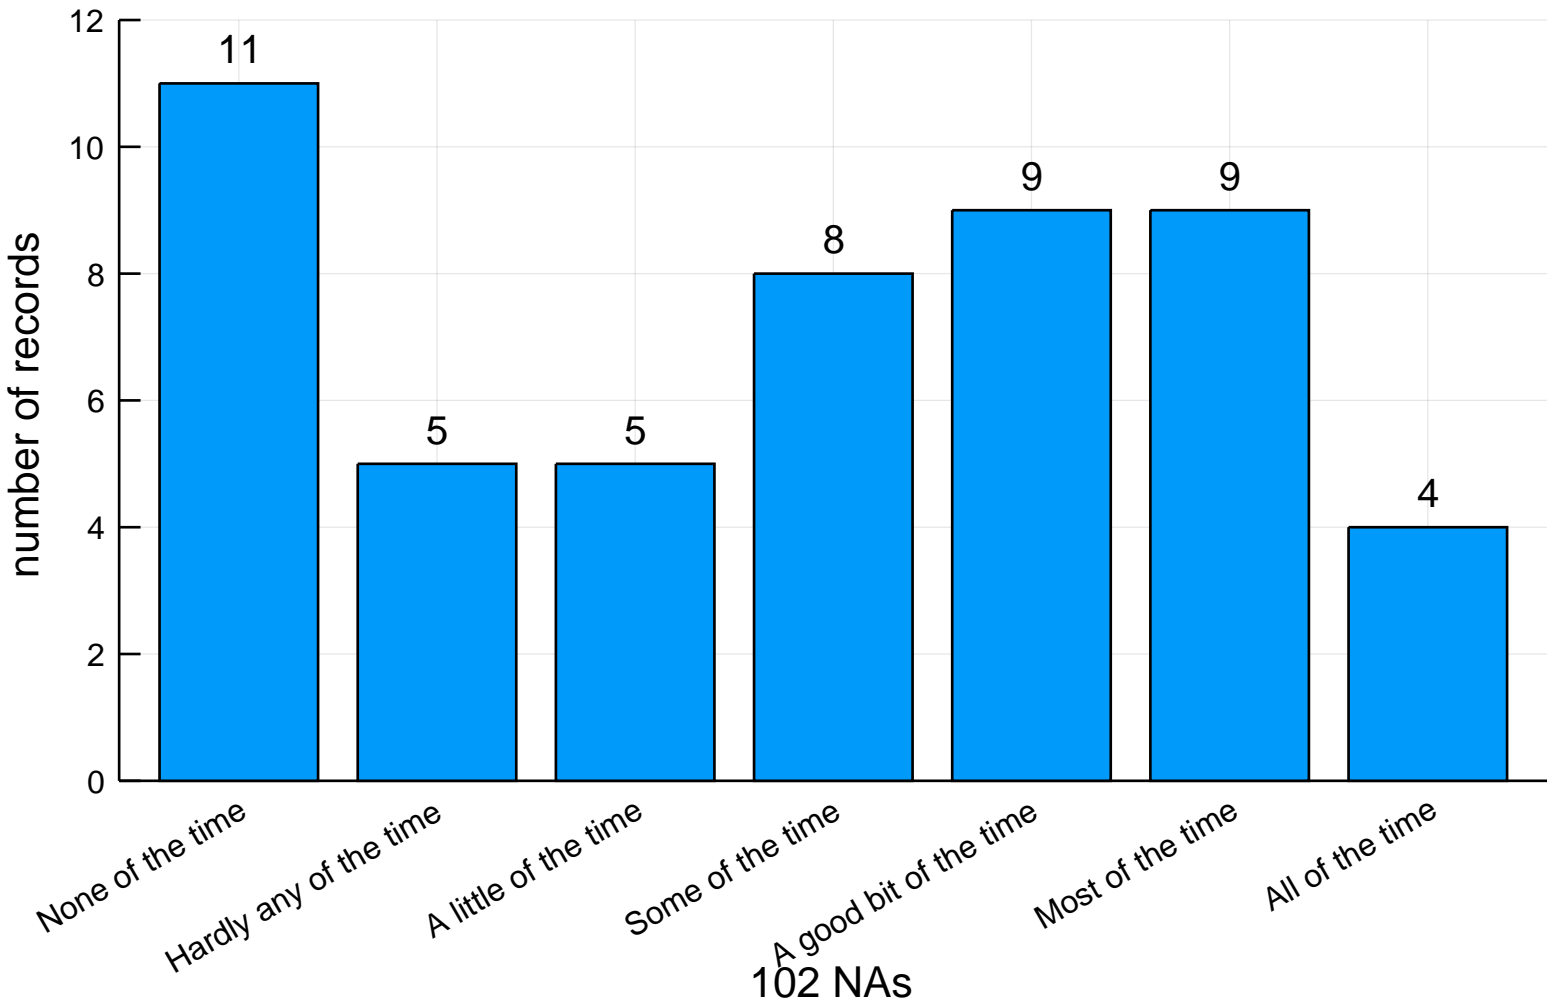

x1 In the past 2 weeks have you received (per site\_sub\_coll

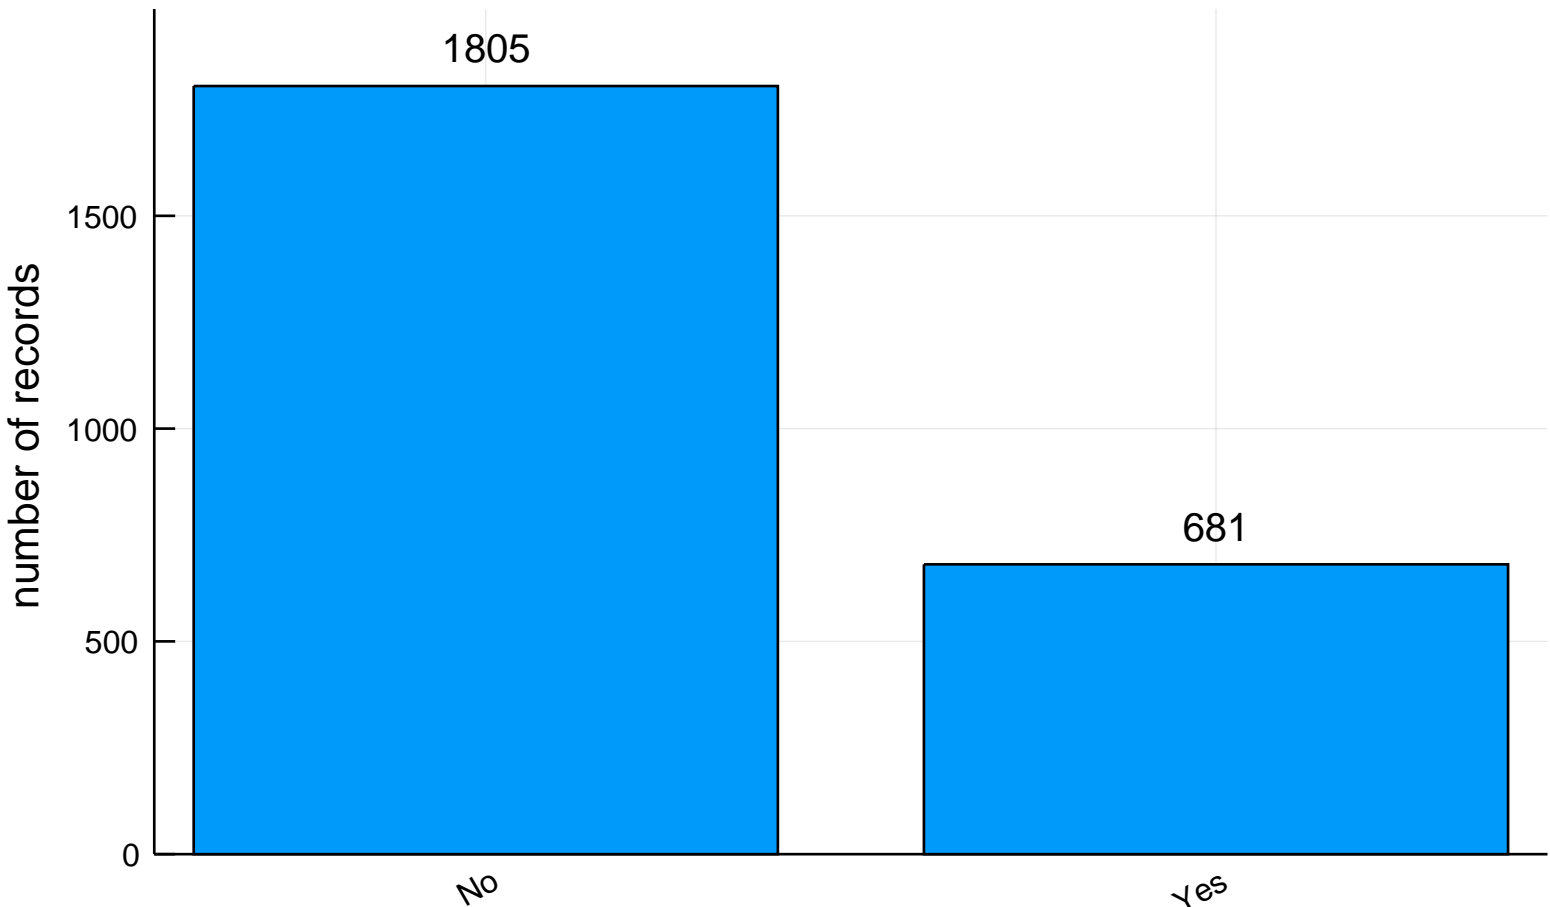

812 NAs

# x2a Red or sore eyes (per Participant\_ID)

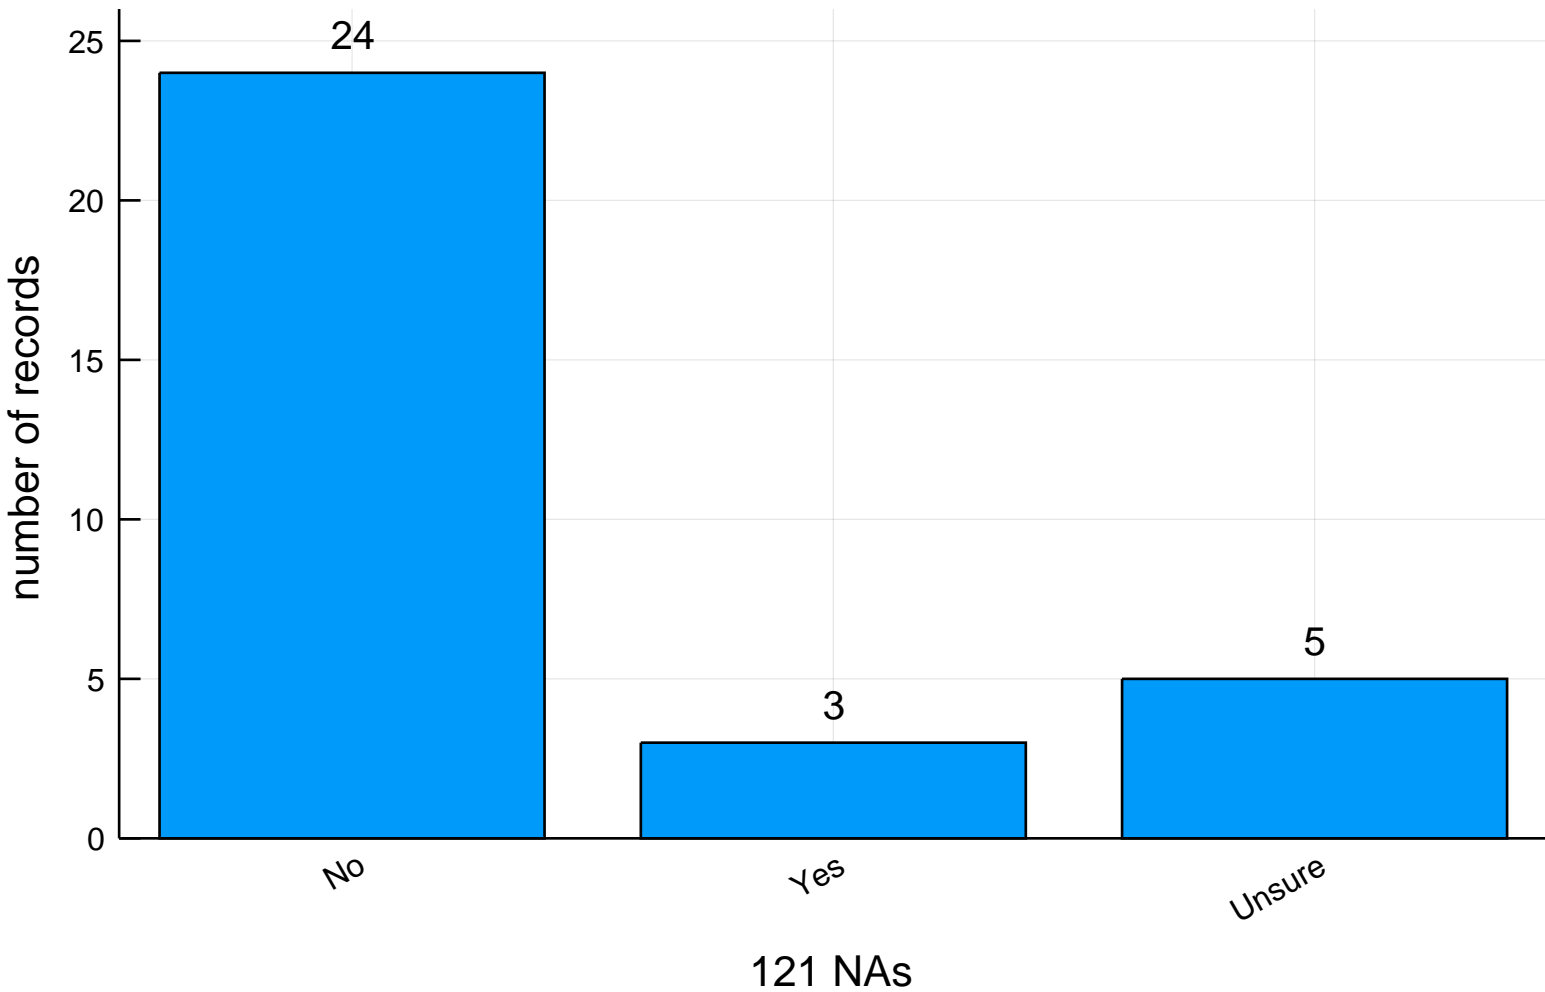

# x2b An abscess collection of puss in you (per Participant\_ID)

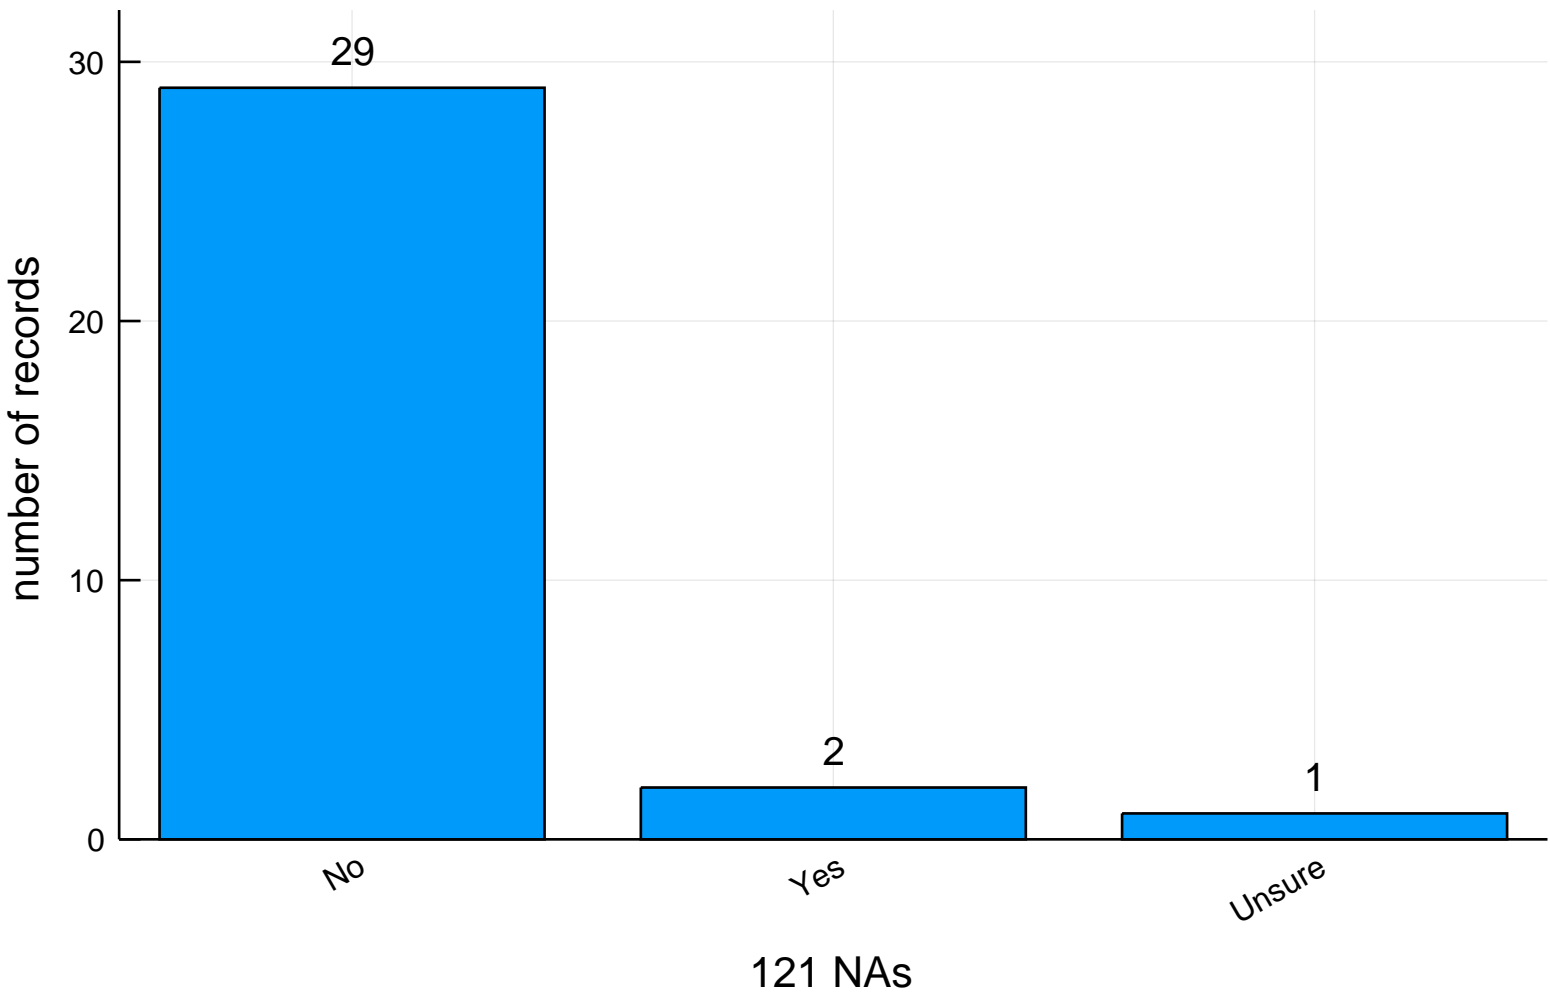

# x2c An abscess on the buttock or around (per Participant\_ID)

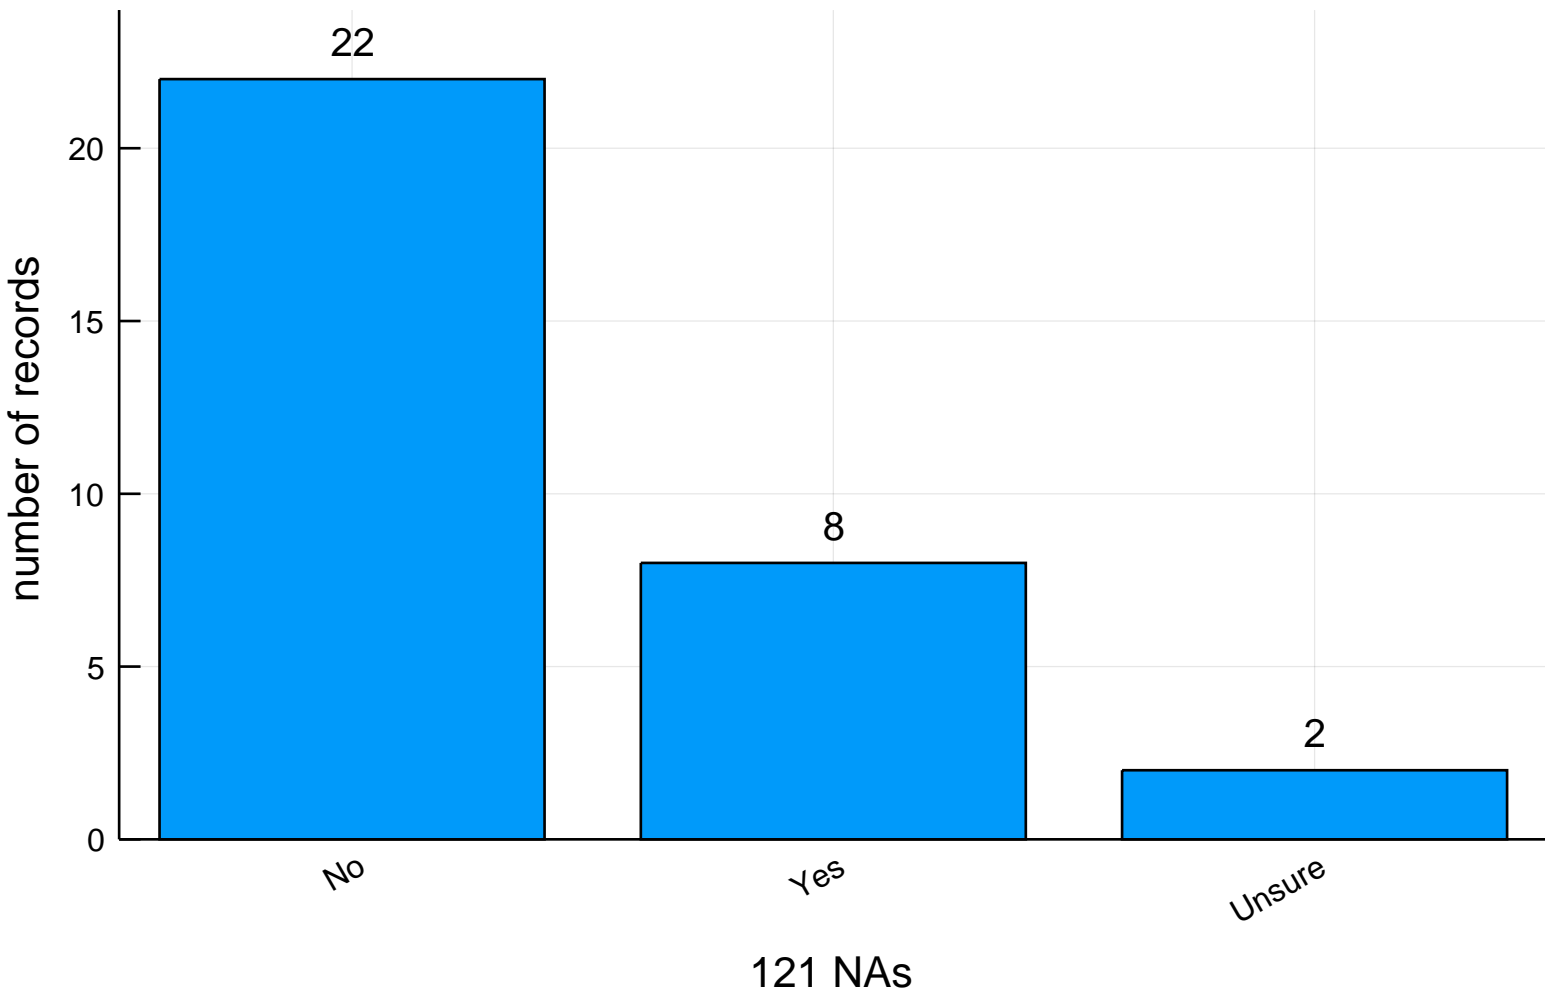



# x2d A narrowing of the bowel a stricture (per Participant\_ID)

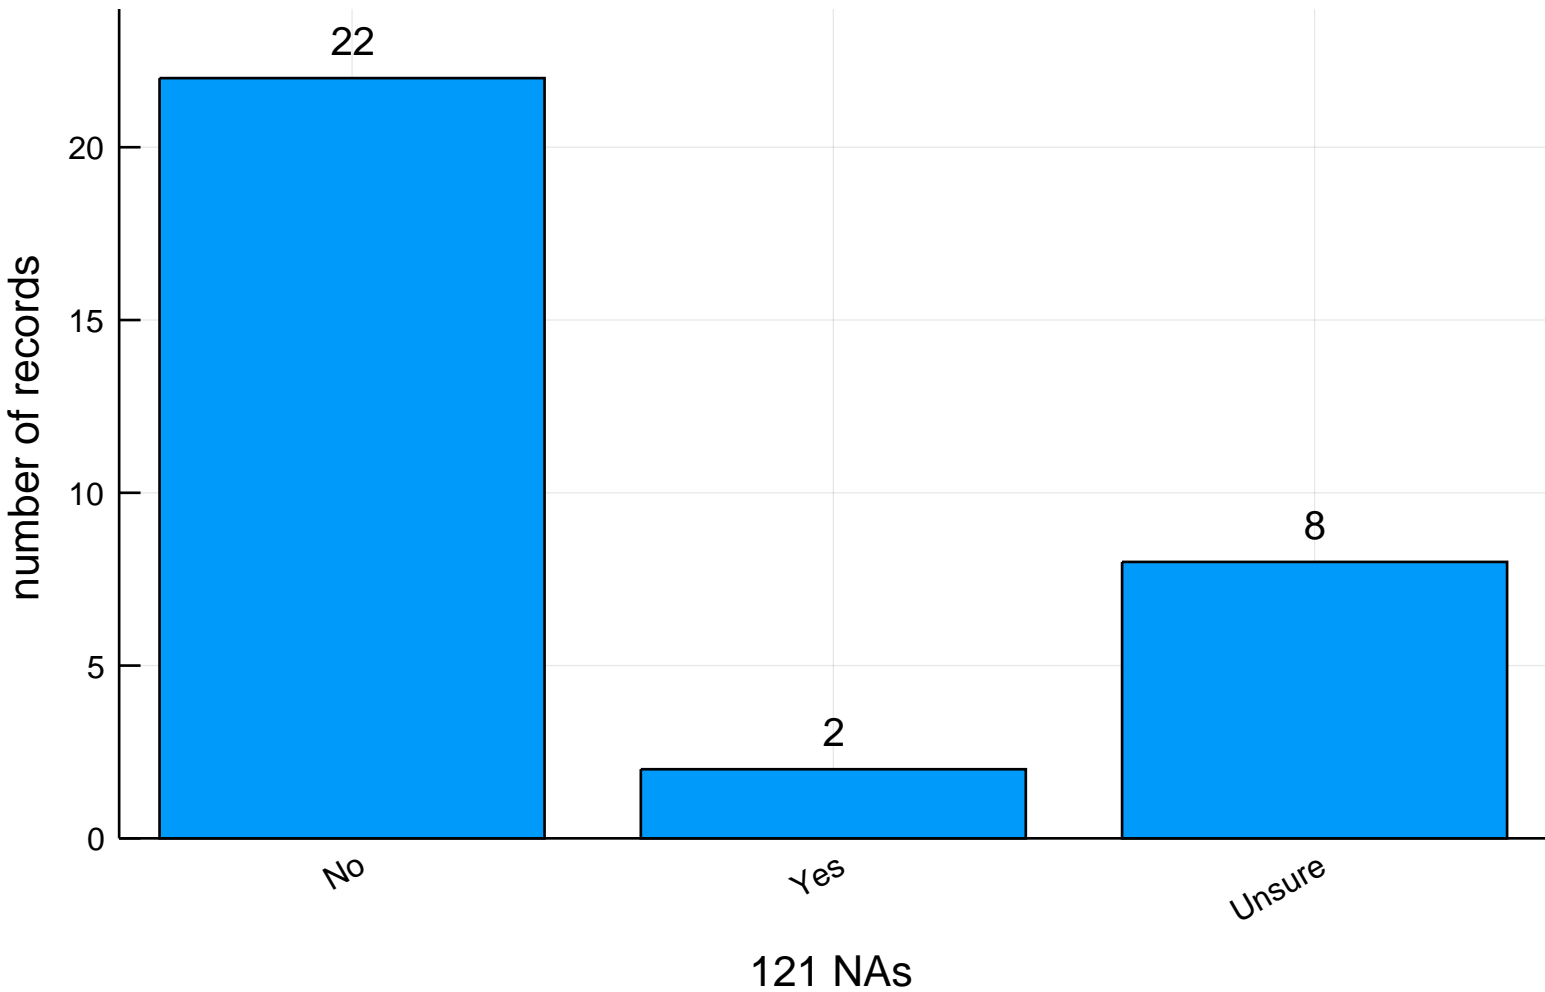

# x2e A fistula an abdominal connection (per Participant\_ID)

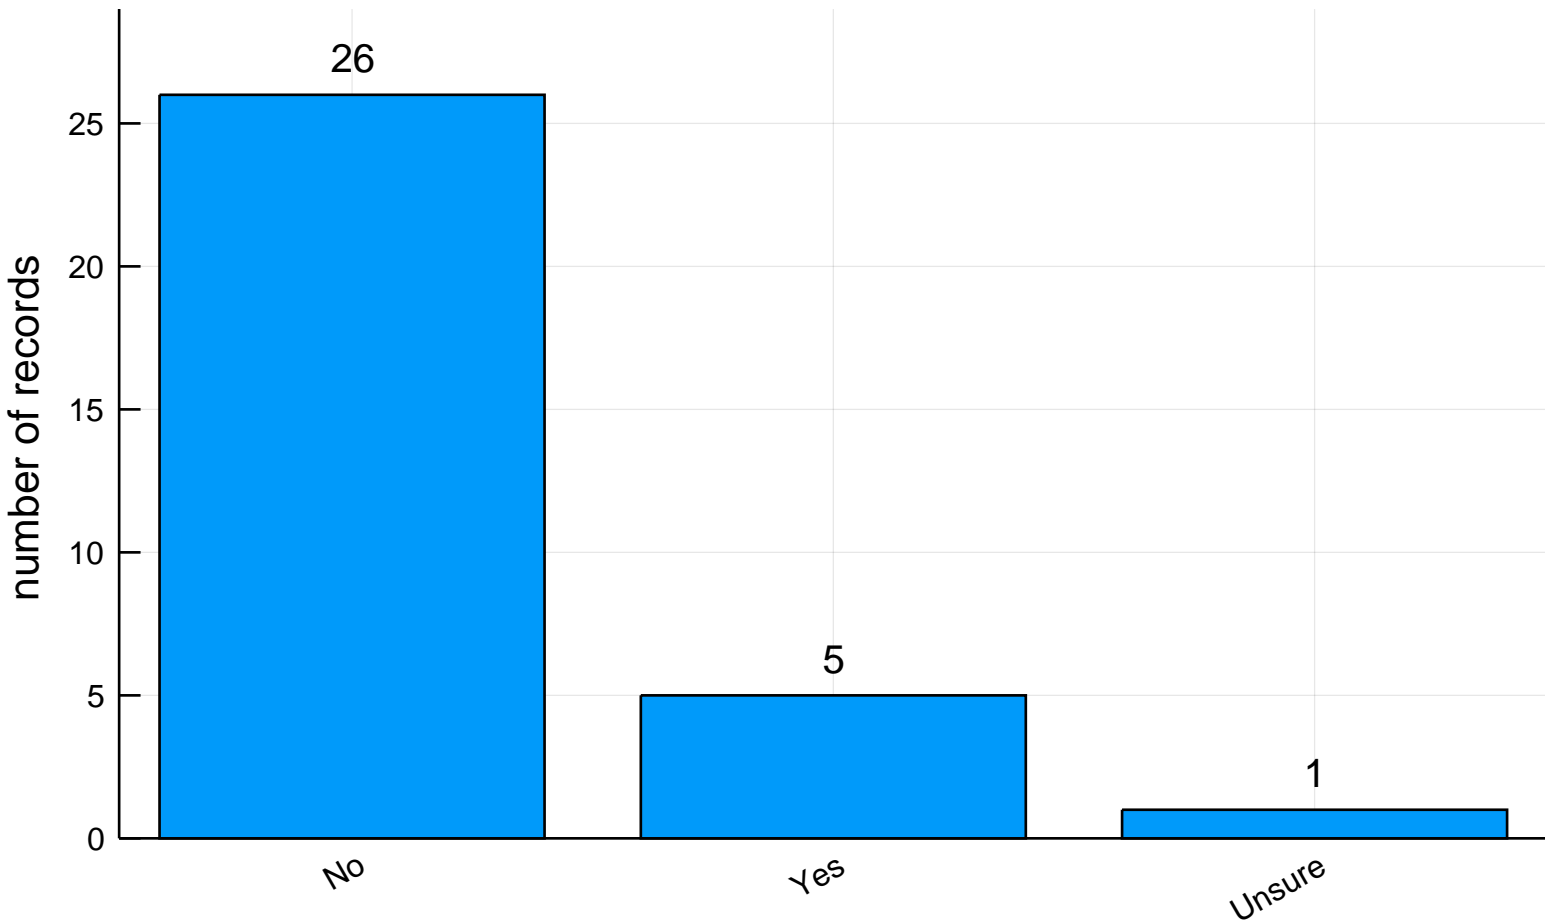

121 NAs

# x2f A draining fistula if you have a fis (per Participant\_ID)

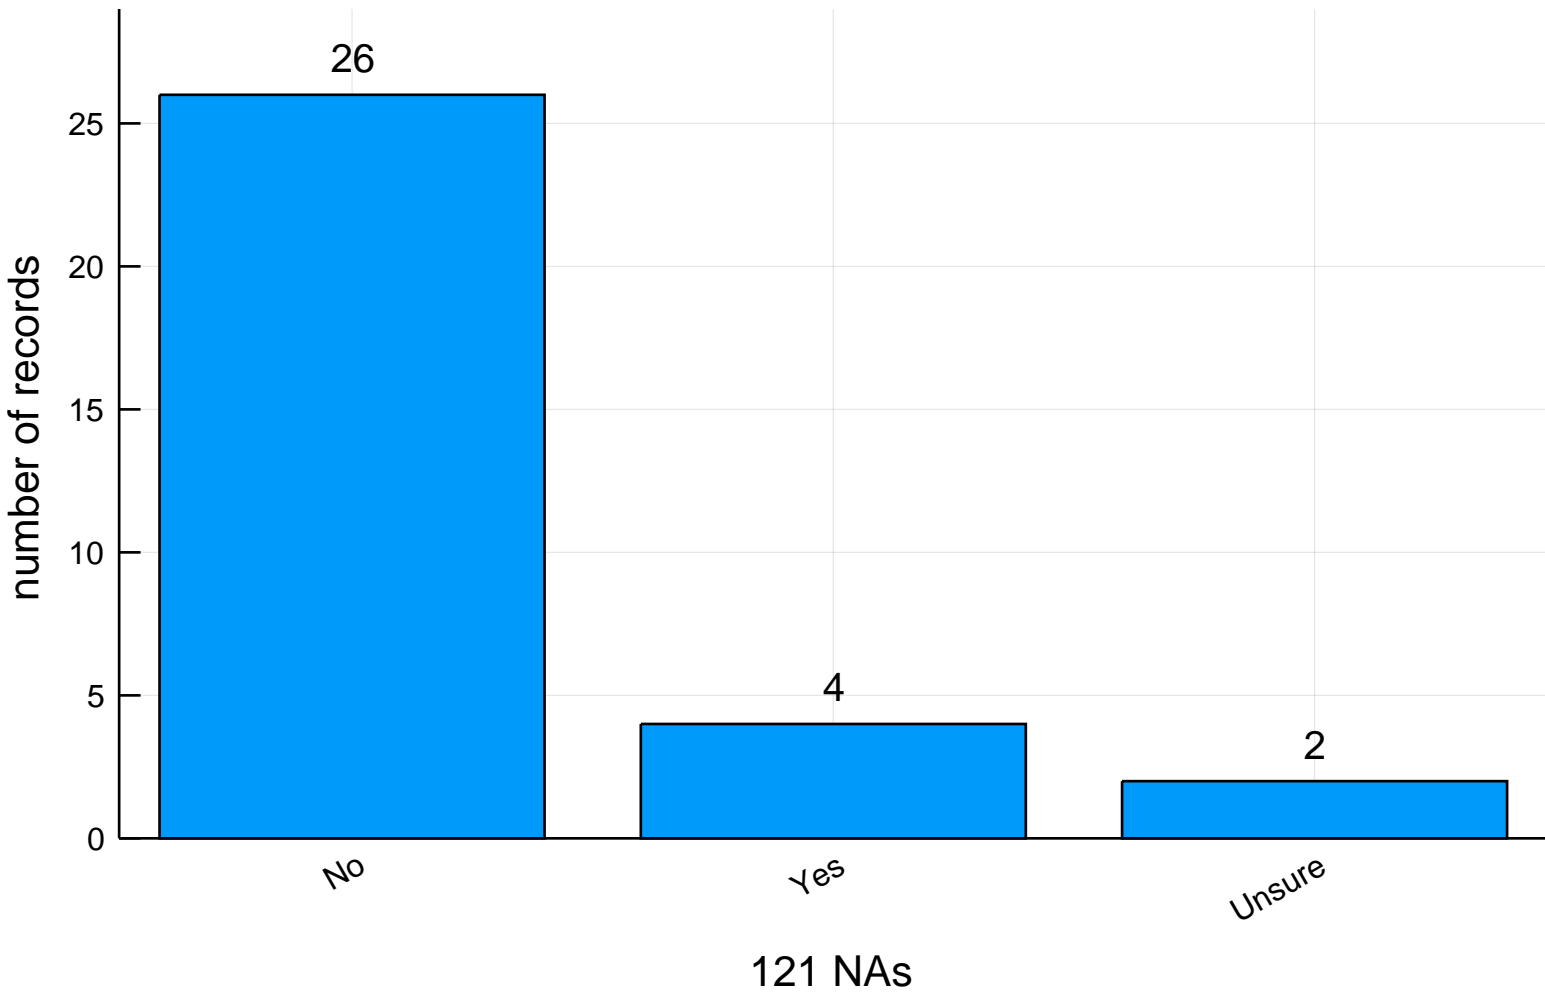

# x2g Skin problems (per Participant\_ID)

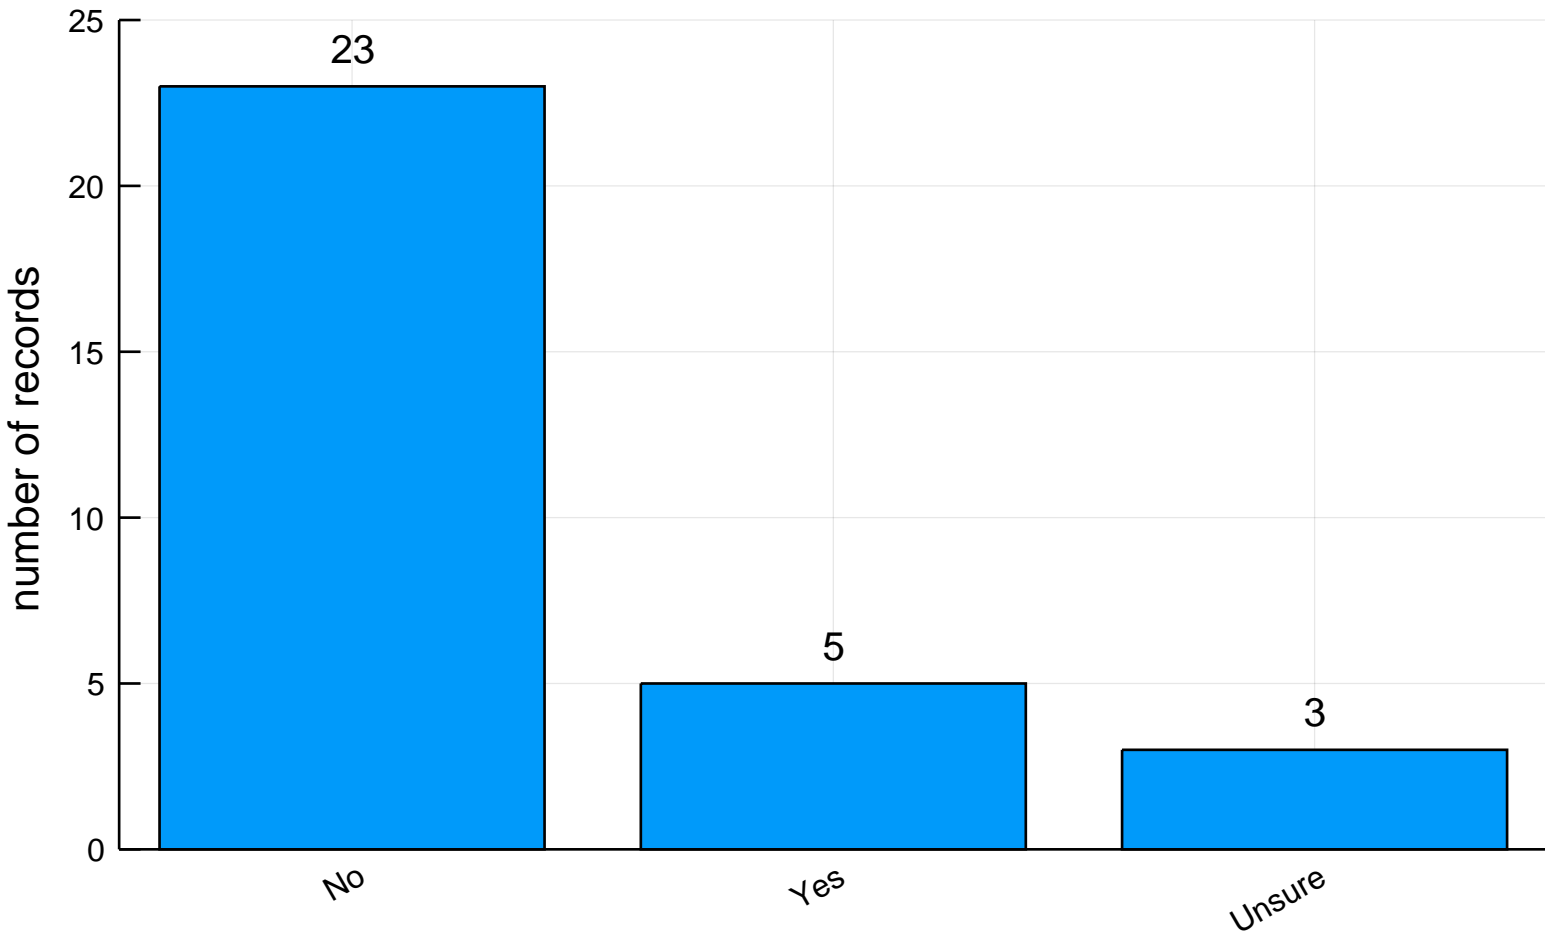

122 NAs

# x2 Delay or cancel a social engagement (per Participant\_ID)

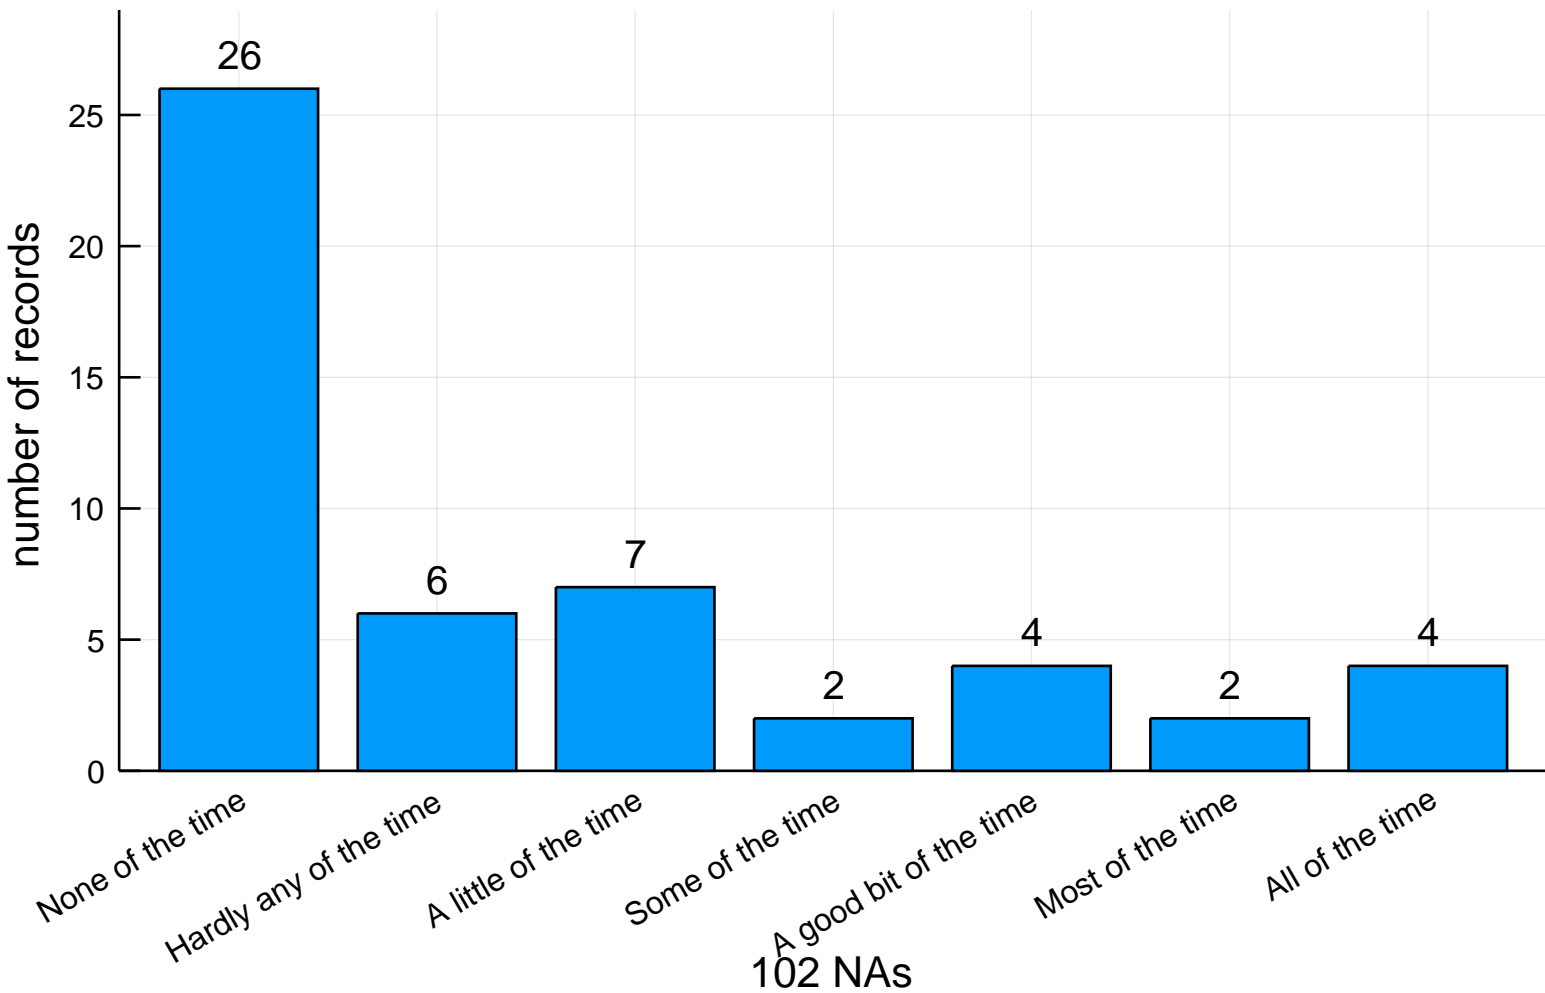

# x2 In the past 2 weeks have you undergone (per row)

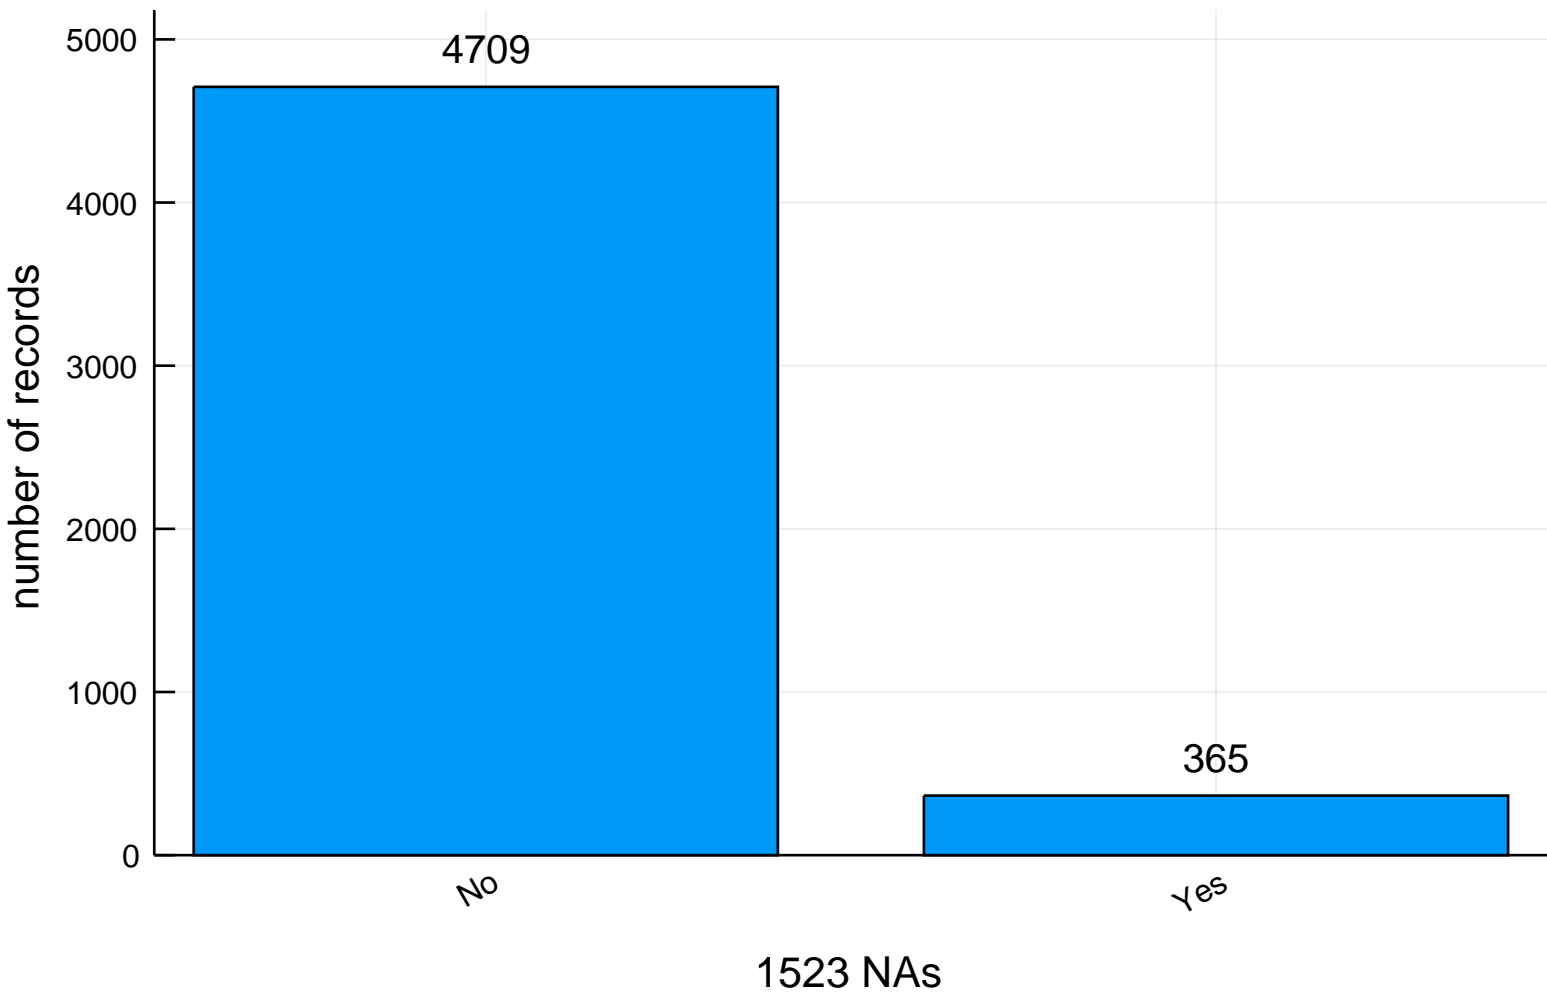

# x3a Fever greater than 100.5 degrees Fah (per Participant\_ID)

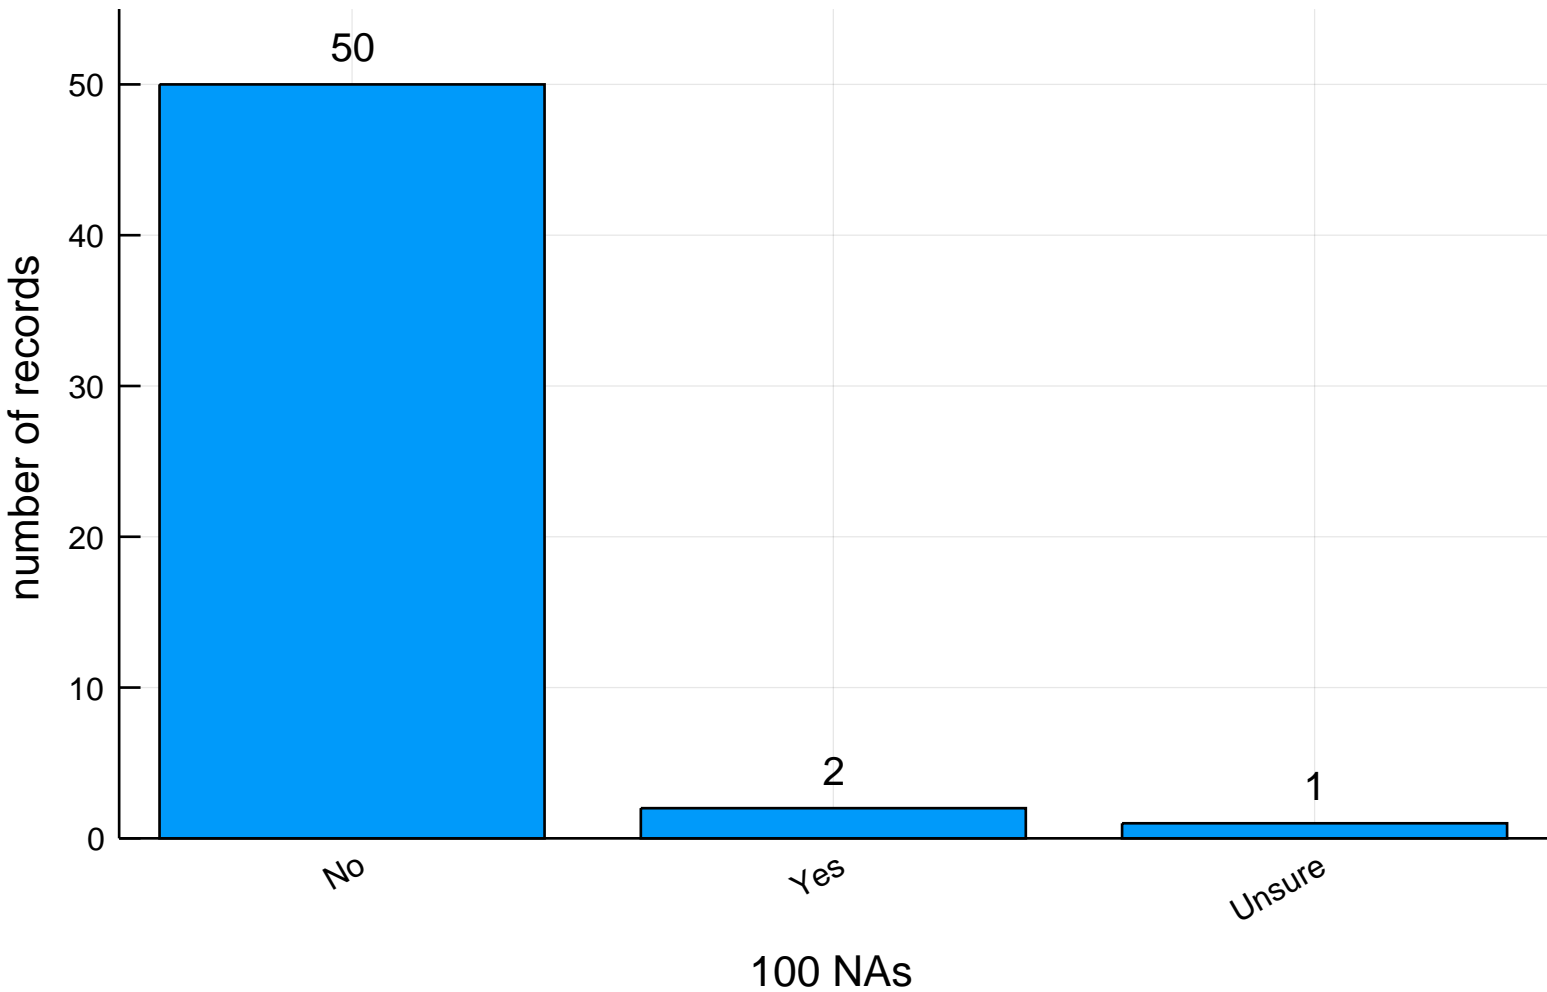

# x3b Fatigue or lack of energy (per Participant\_ID)

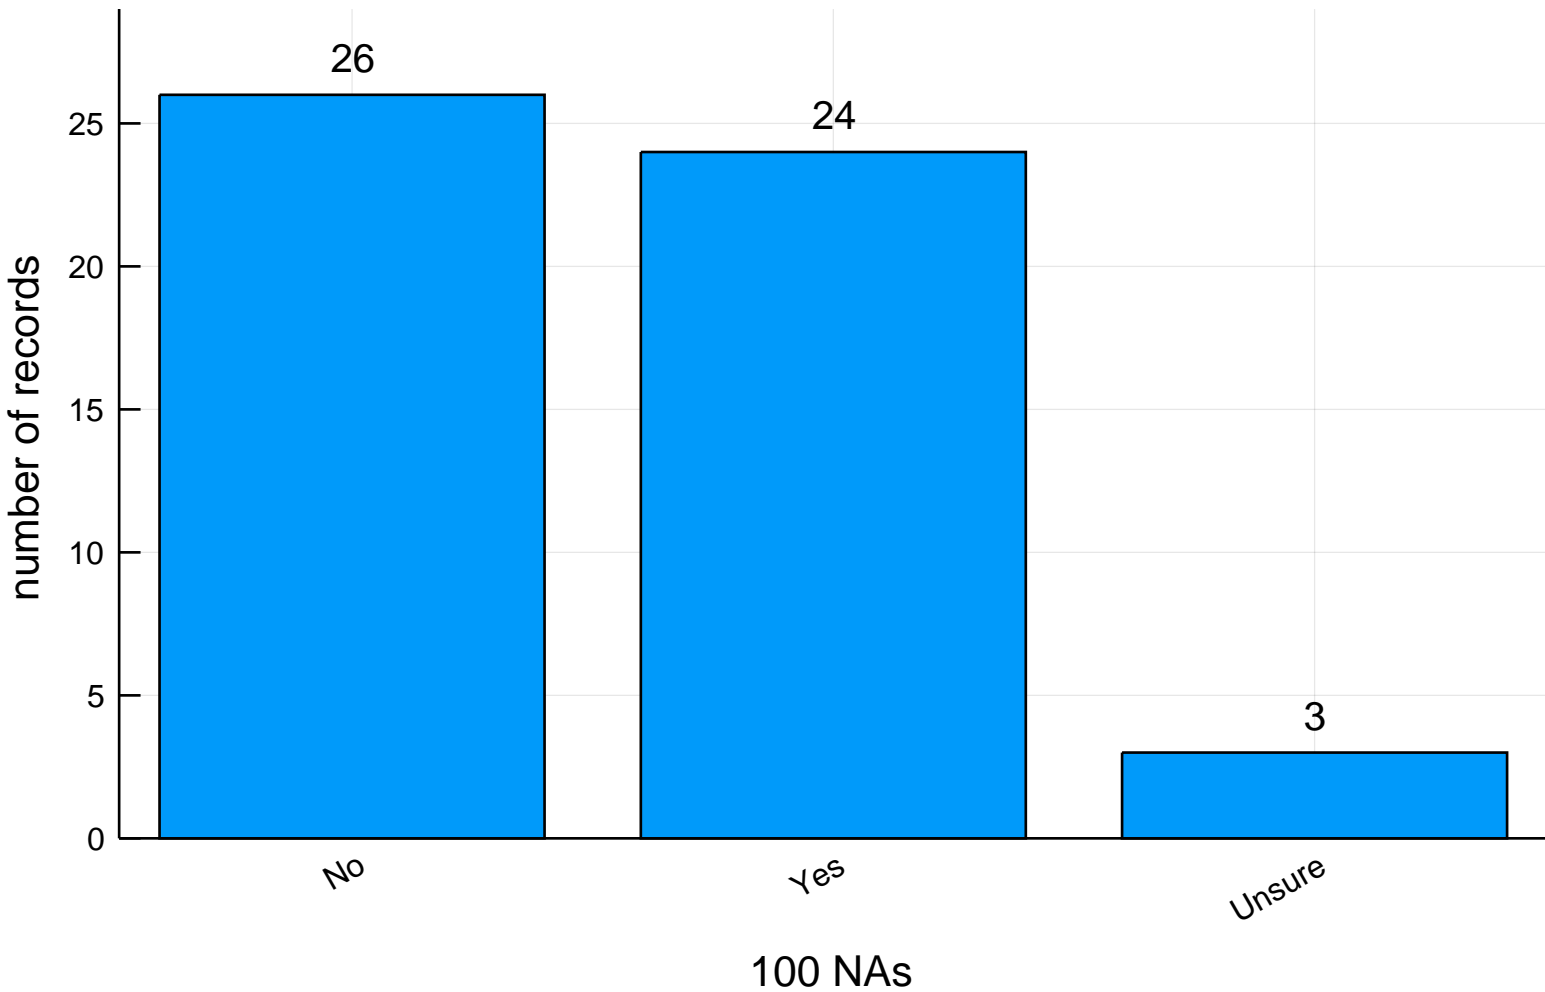



# x3c Difficulty sleeping (per Participant\_ID)

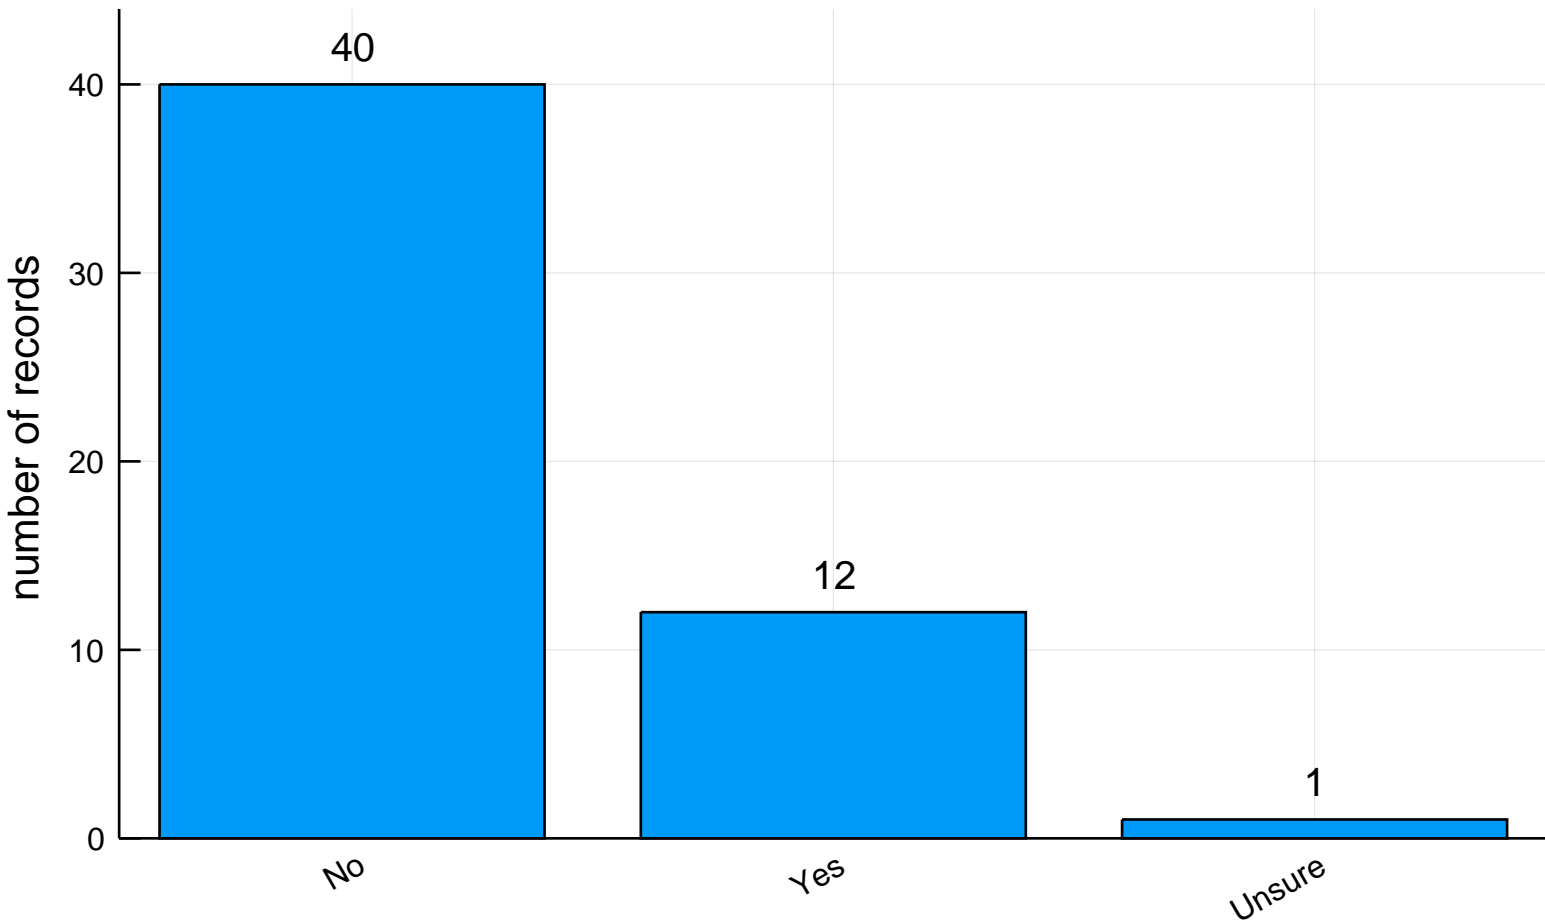

100 NAs

# x3d Nausea (per Participant\_ID)

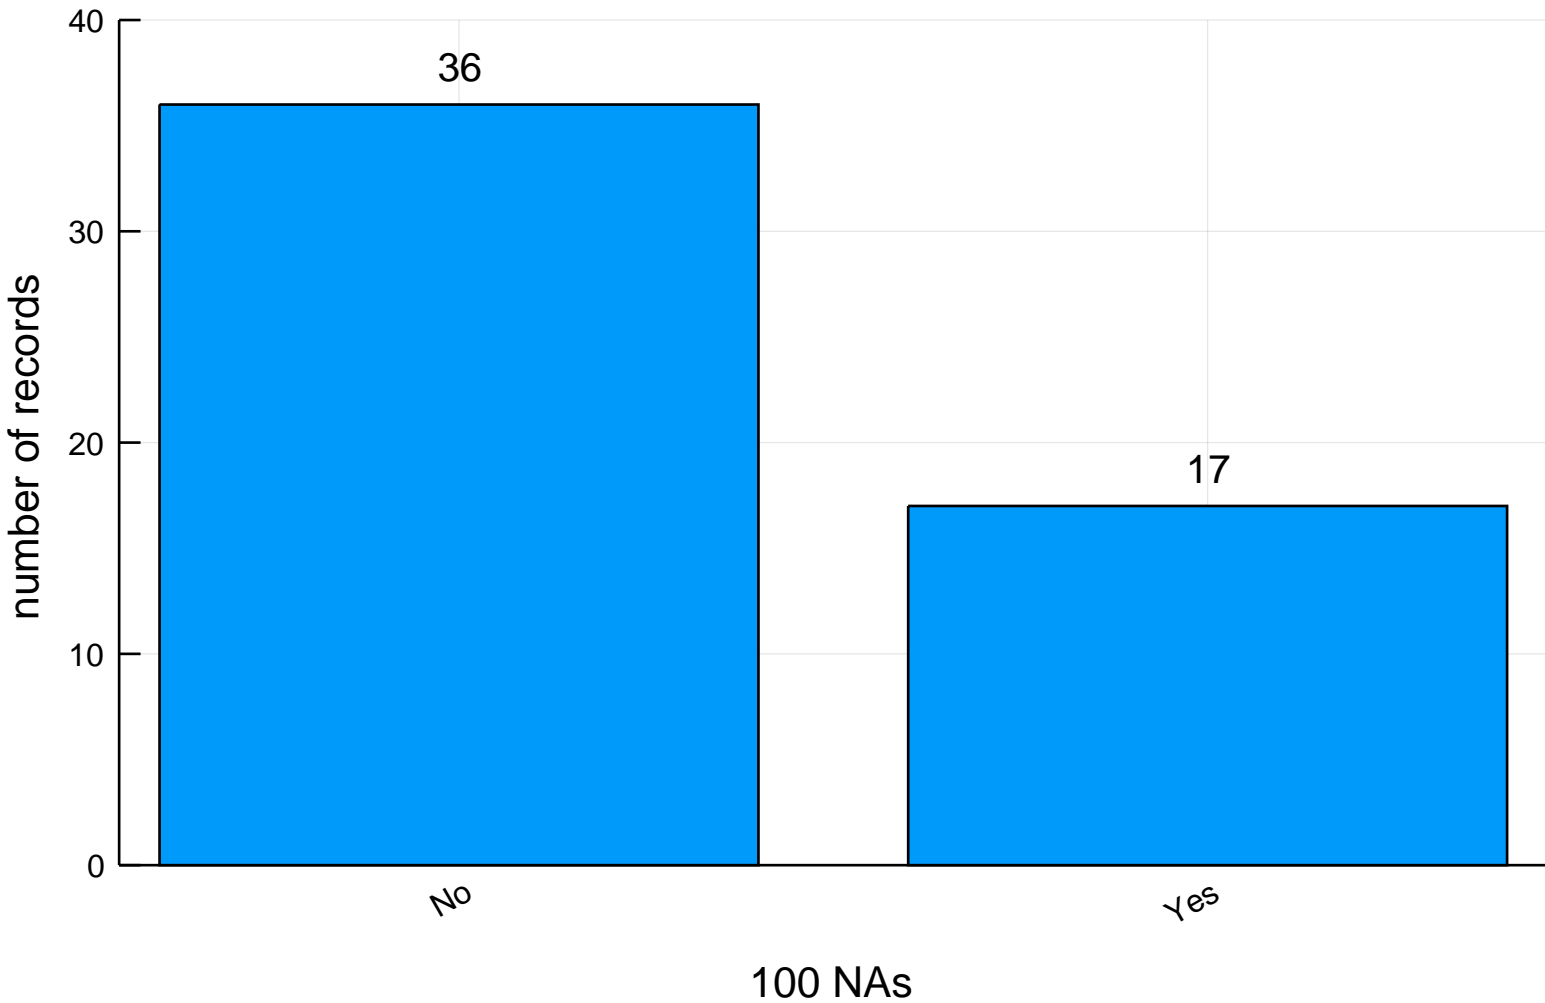

# x3e Vomiting (per Participant\_ID)

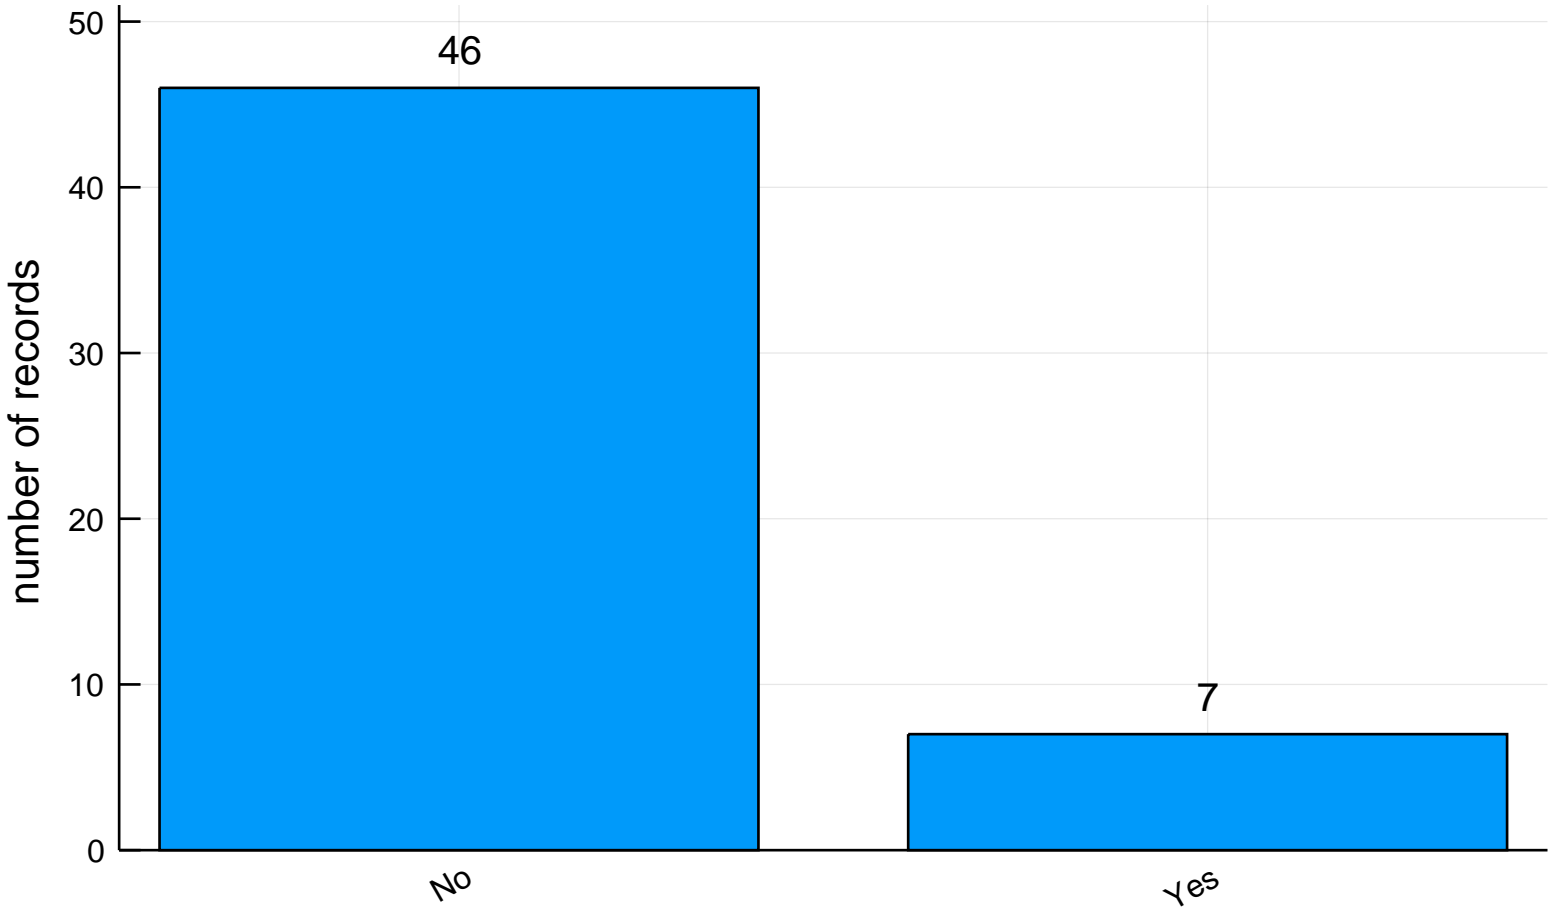

100 NAs

# x3f Mouth sores (per Participant\_ID)

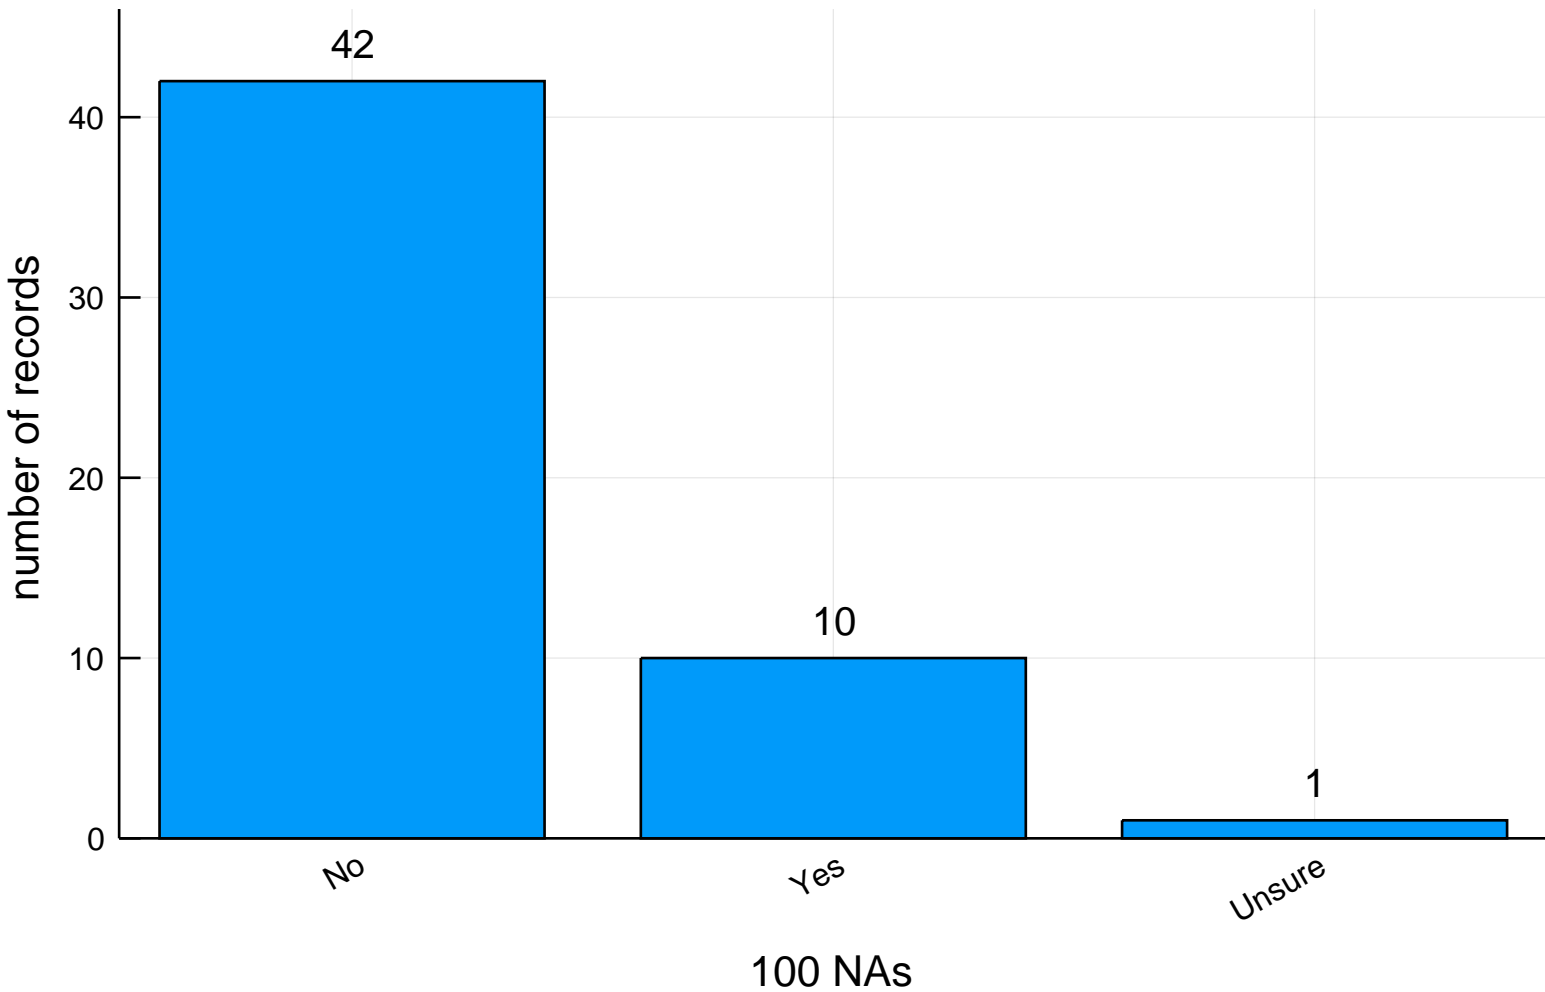

# x3g Back pain (per Participant\_ID)

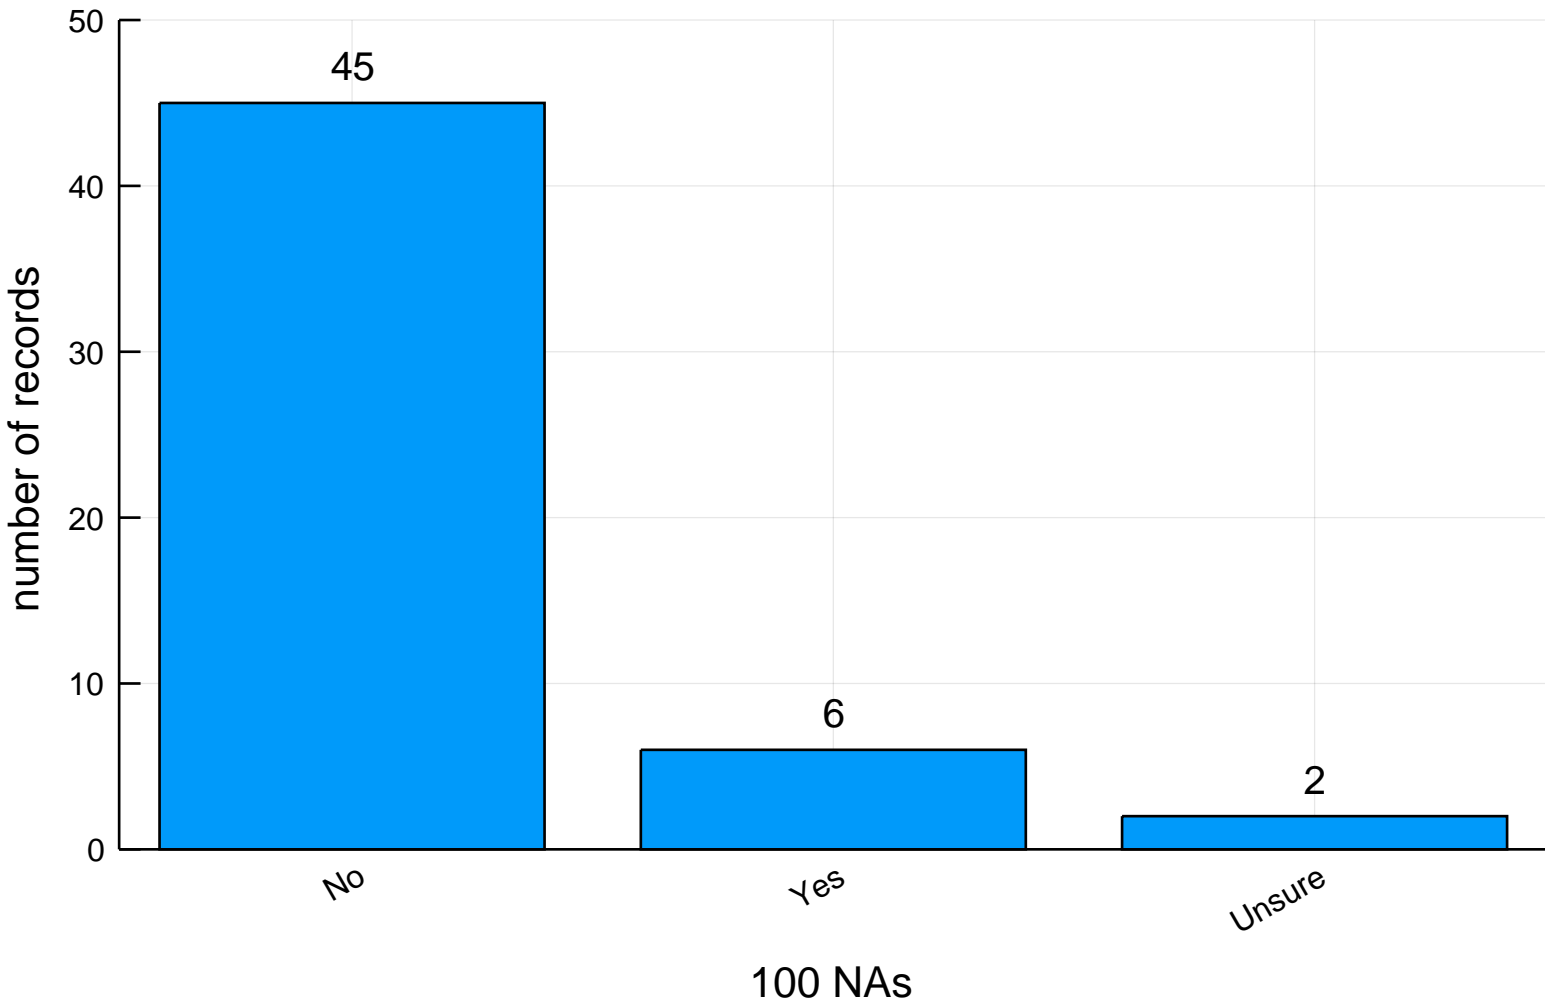

# x3h Night sweats (per Participant\_ID)

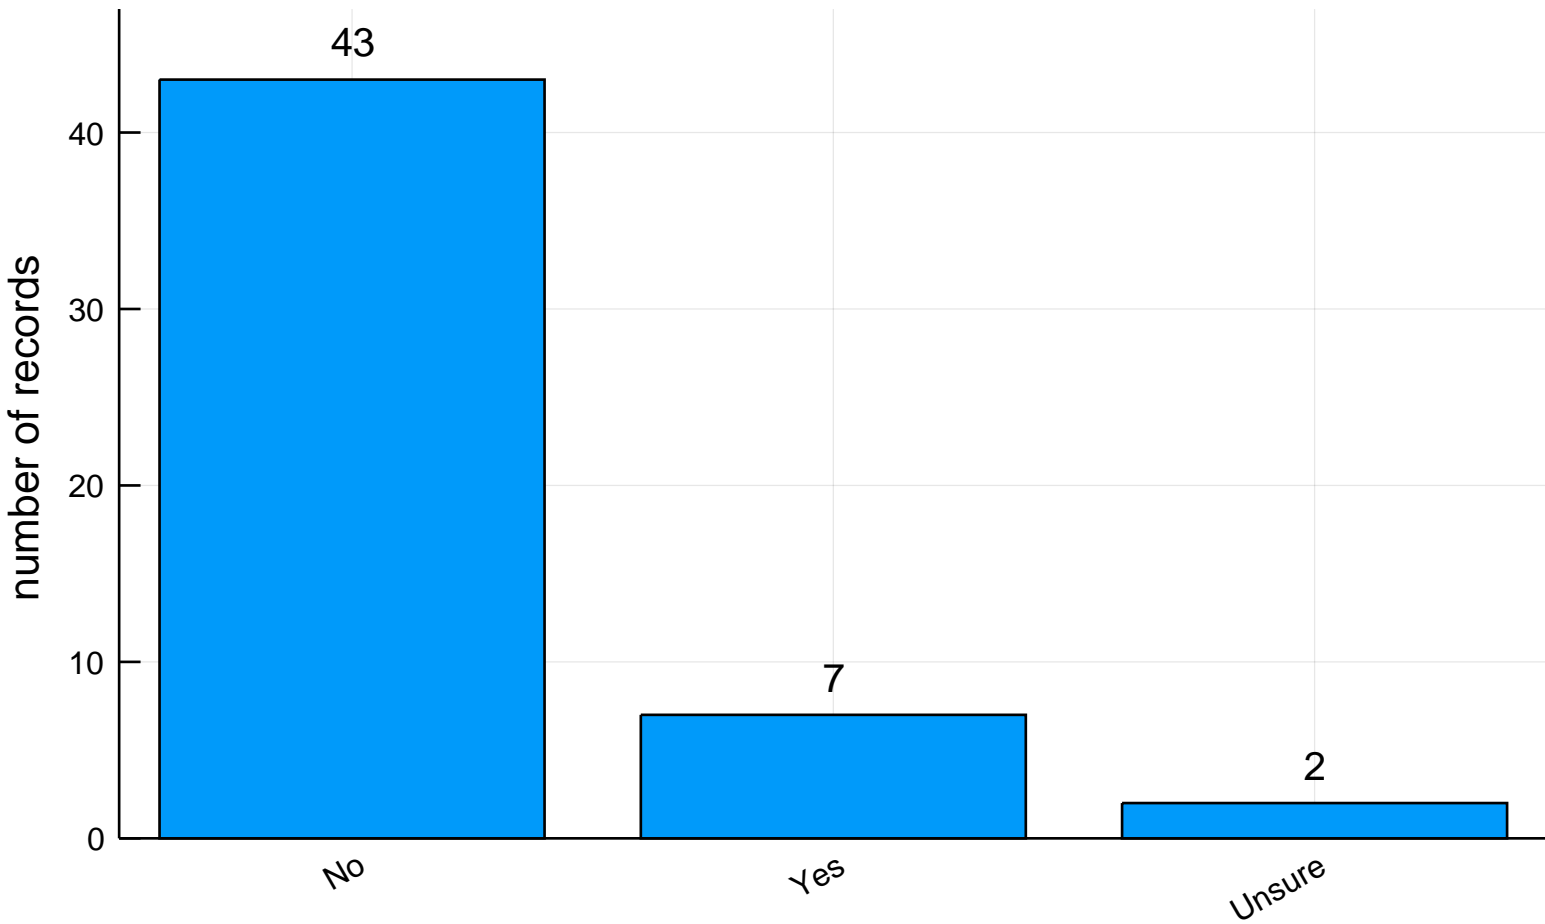

101 NAs

# x3i Decreased appetite (per Participant\_ID)

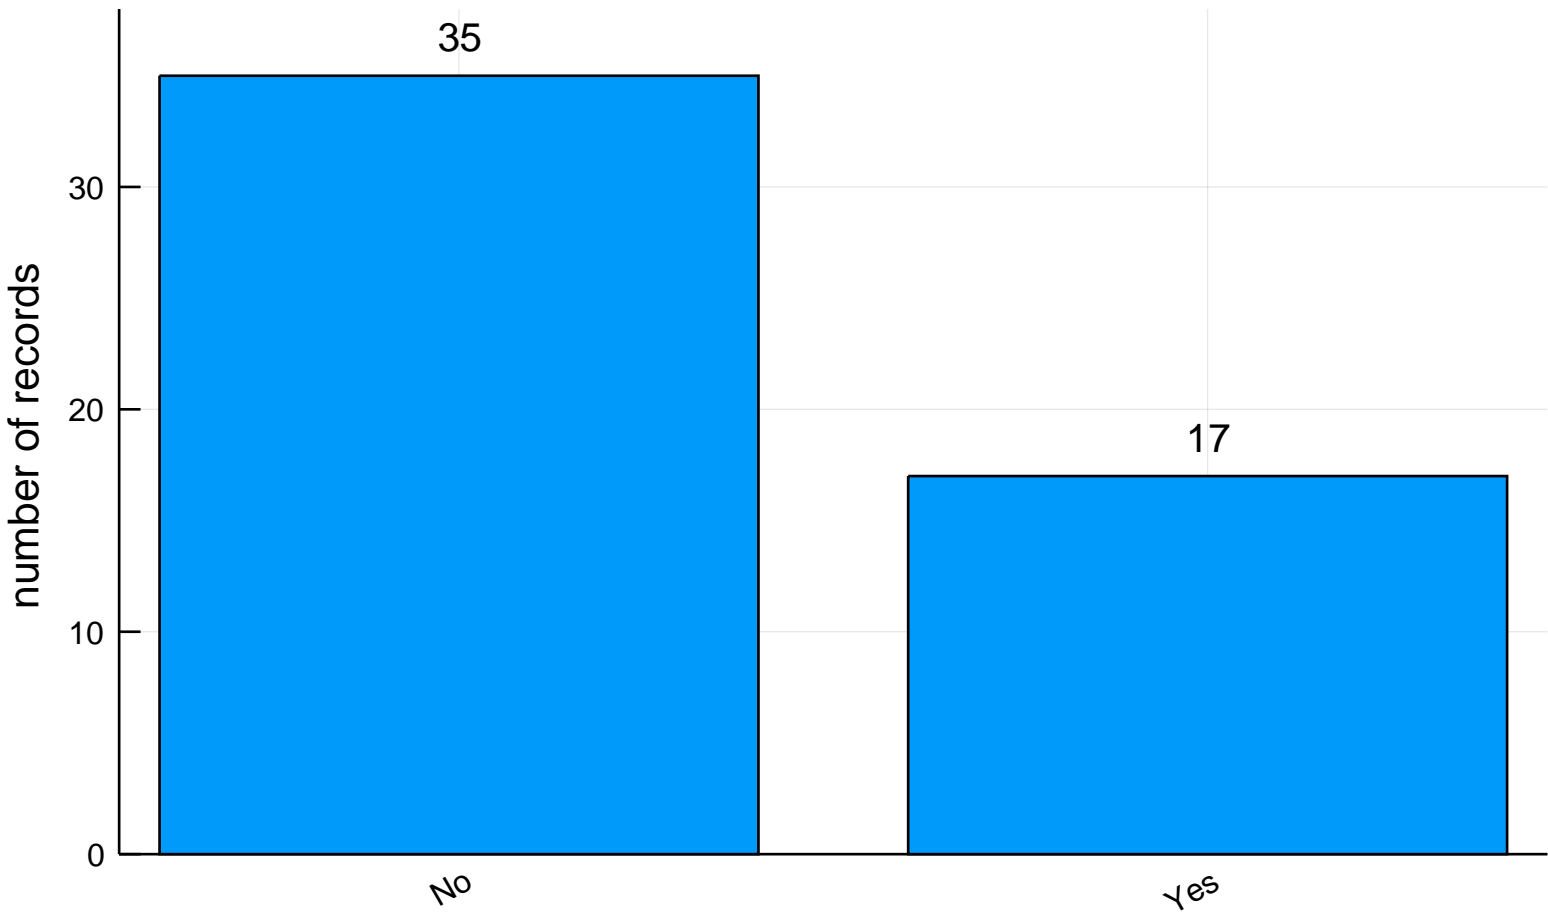

101 NAs

# x3j Weight loss (per Participant\_ID)

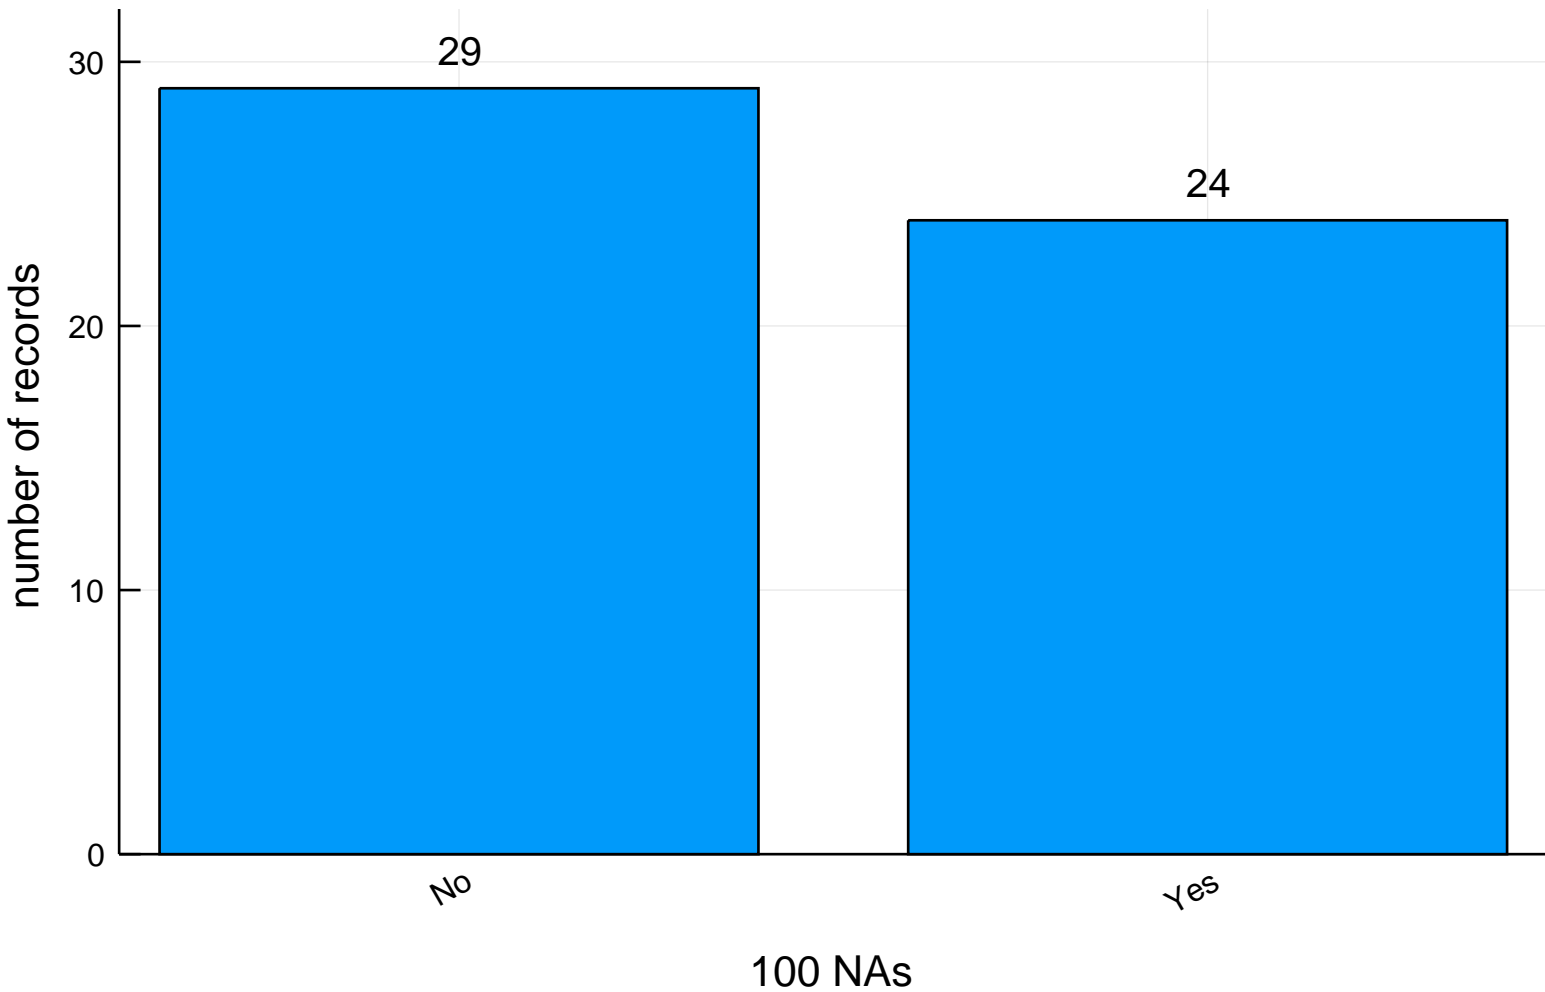



# x3 Difficulty doing leisure or sports ac (per Participant\_ID)

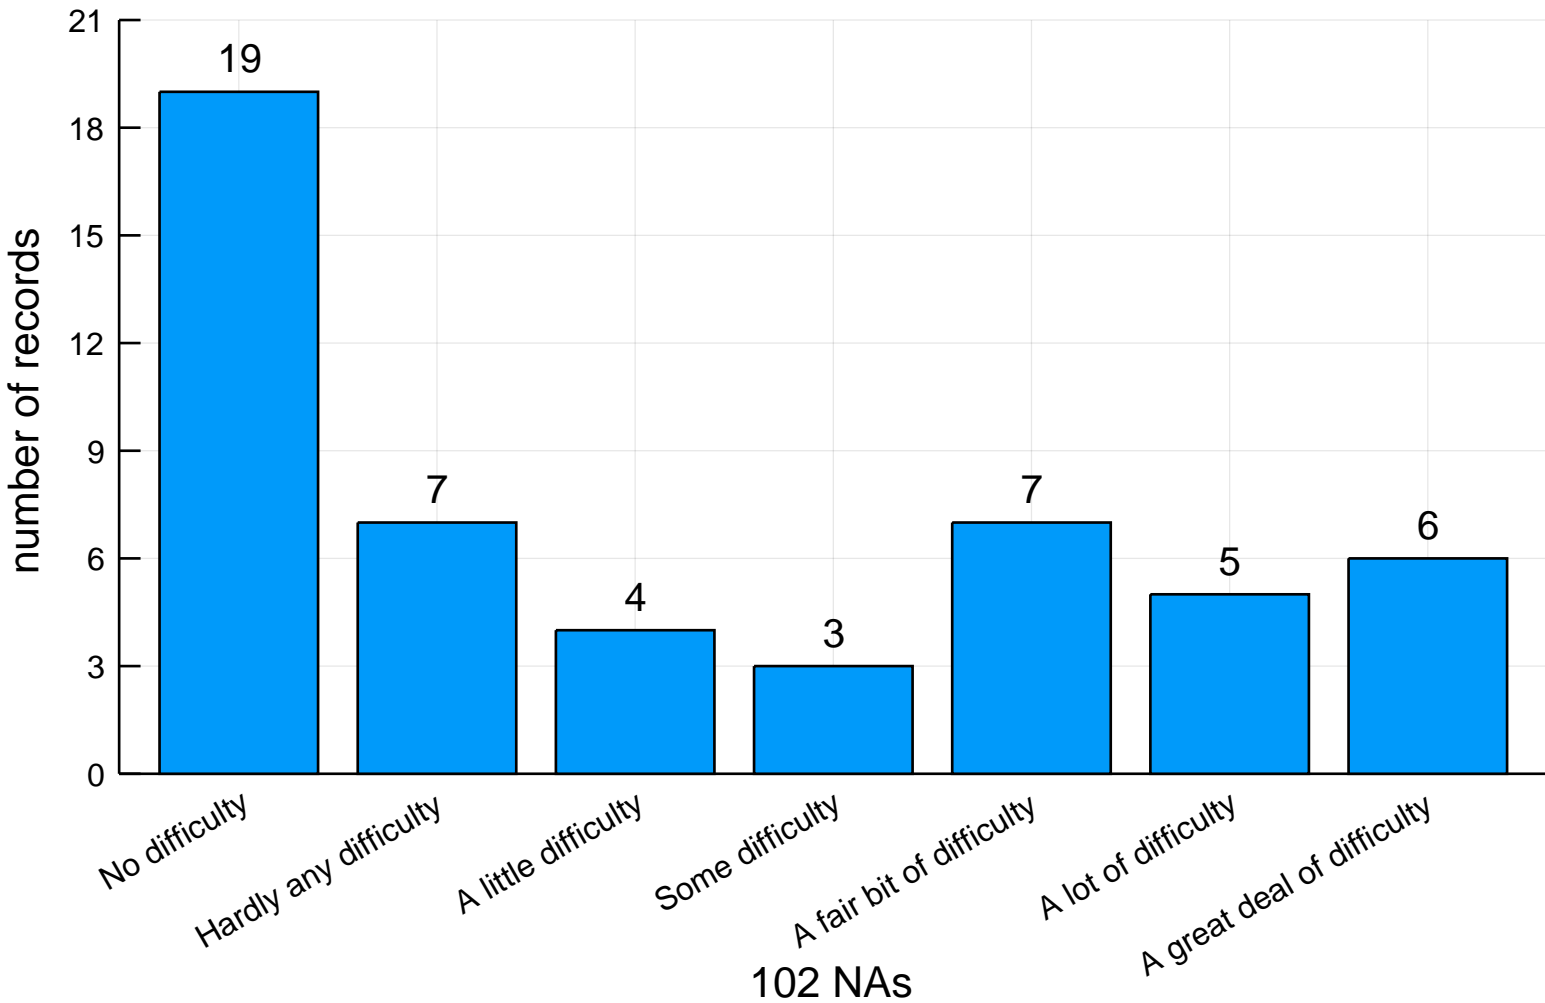

x3 In the past 2 weeks have you used an (per site\_sub\_coll

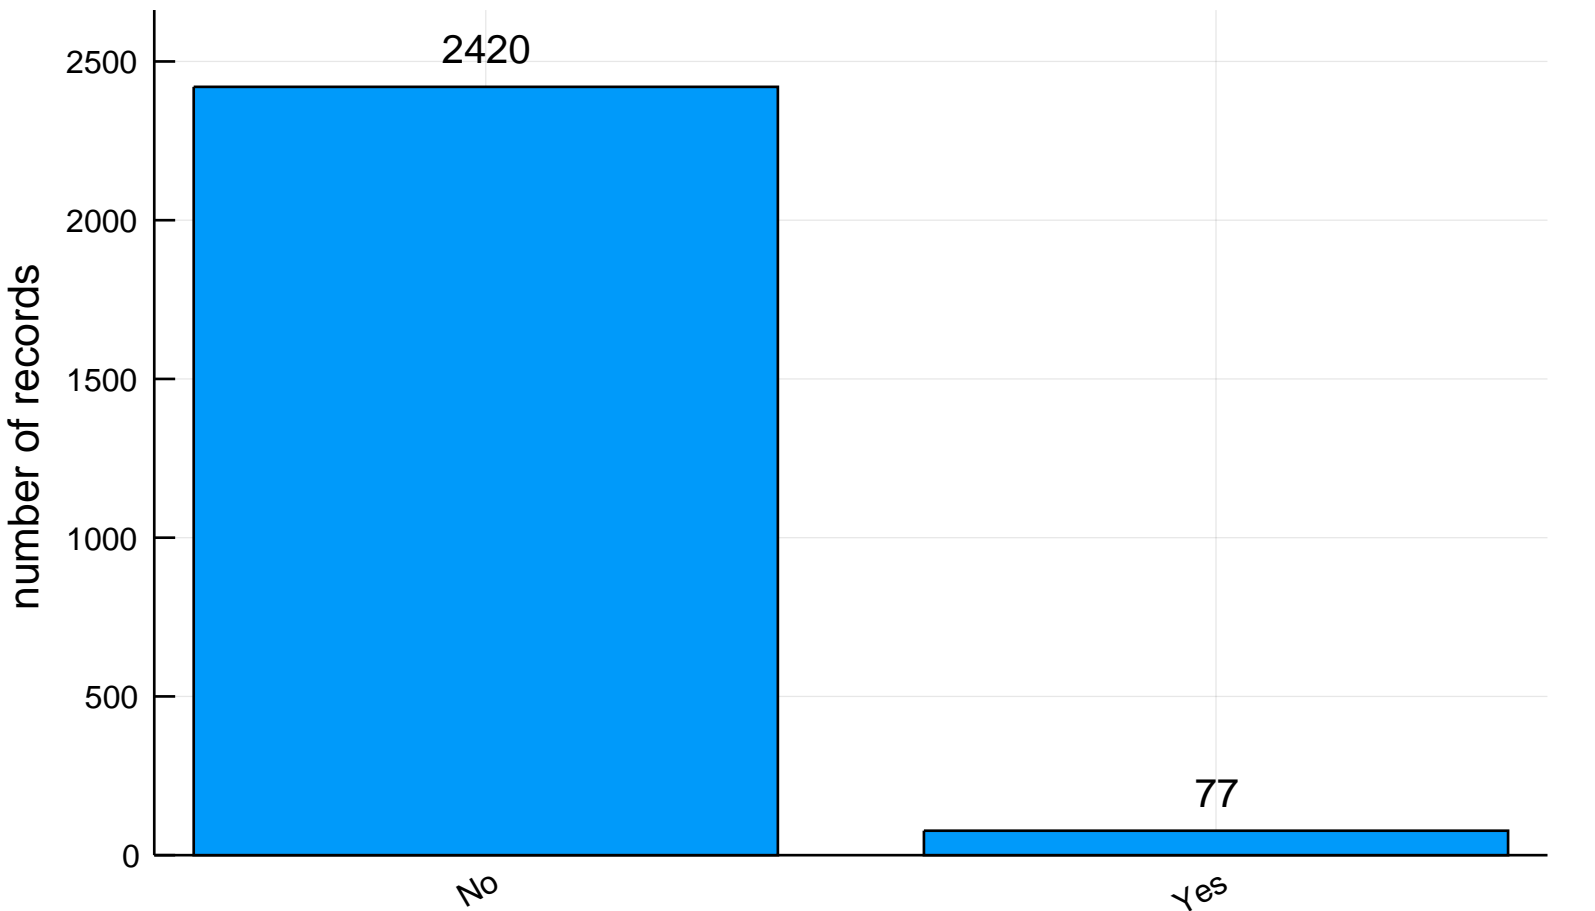

801 NAs

# x4 How often during the last 2 weeks hav (per Participant\_ID)

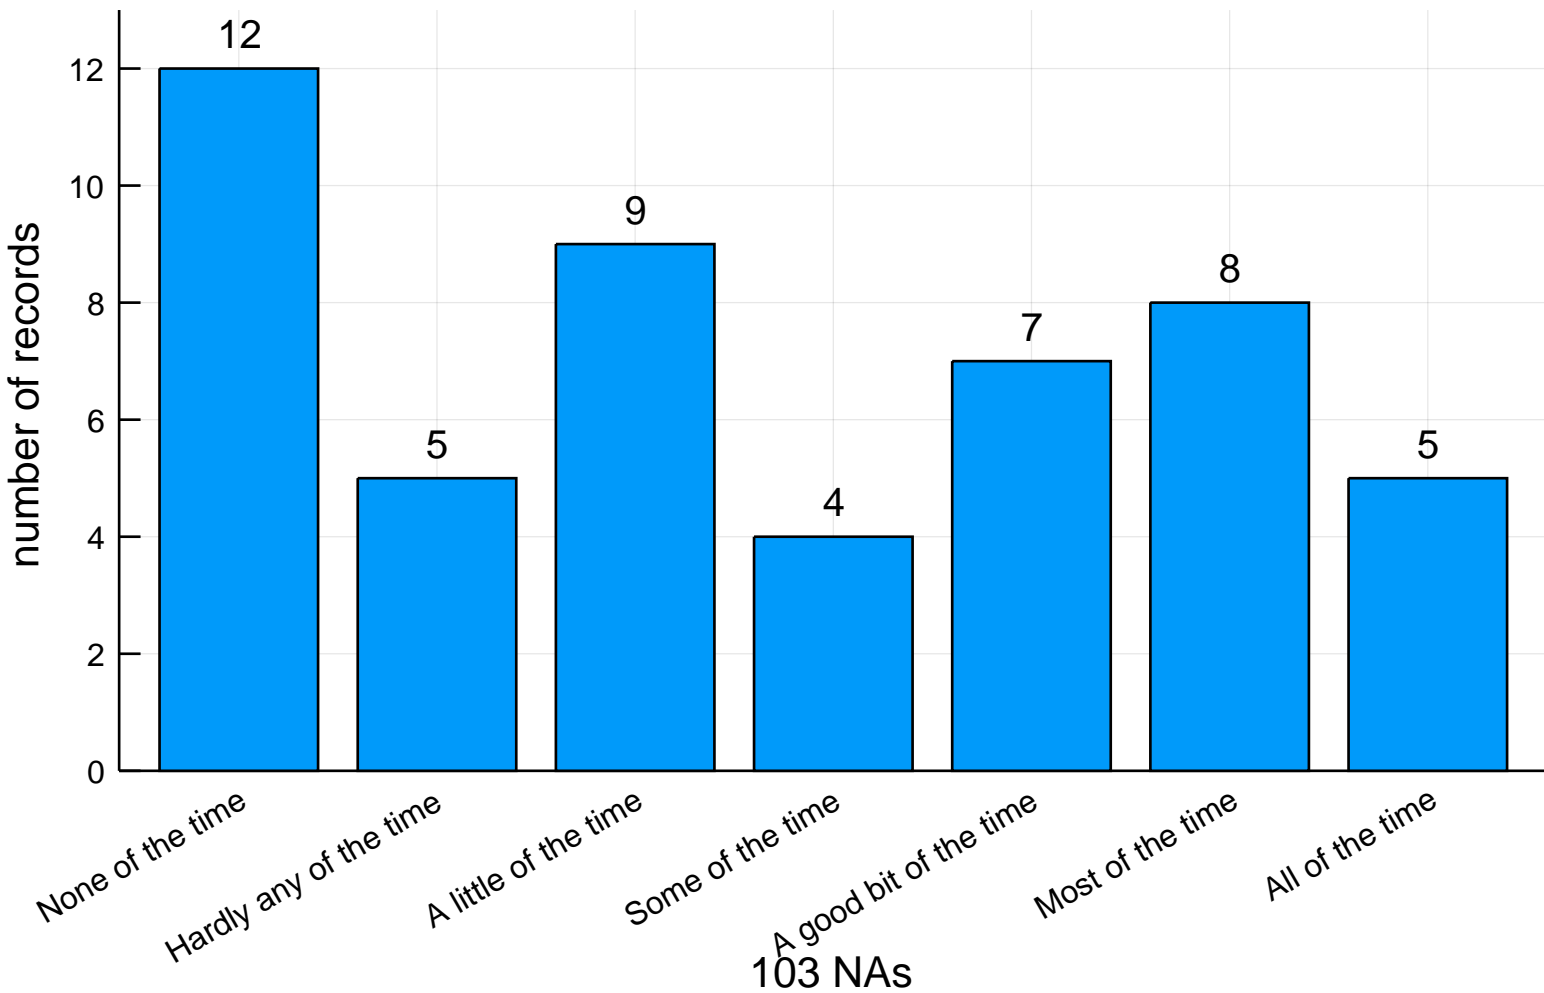

x4 In the past 2 weeks have you had diar (per site\_sub\_coll)

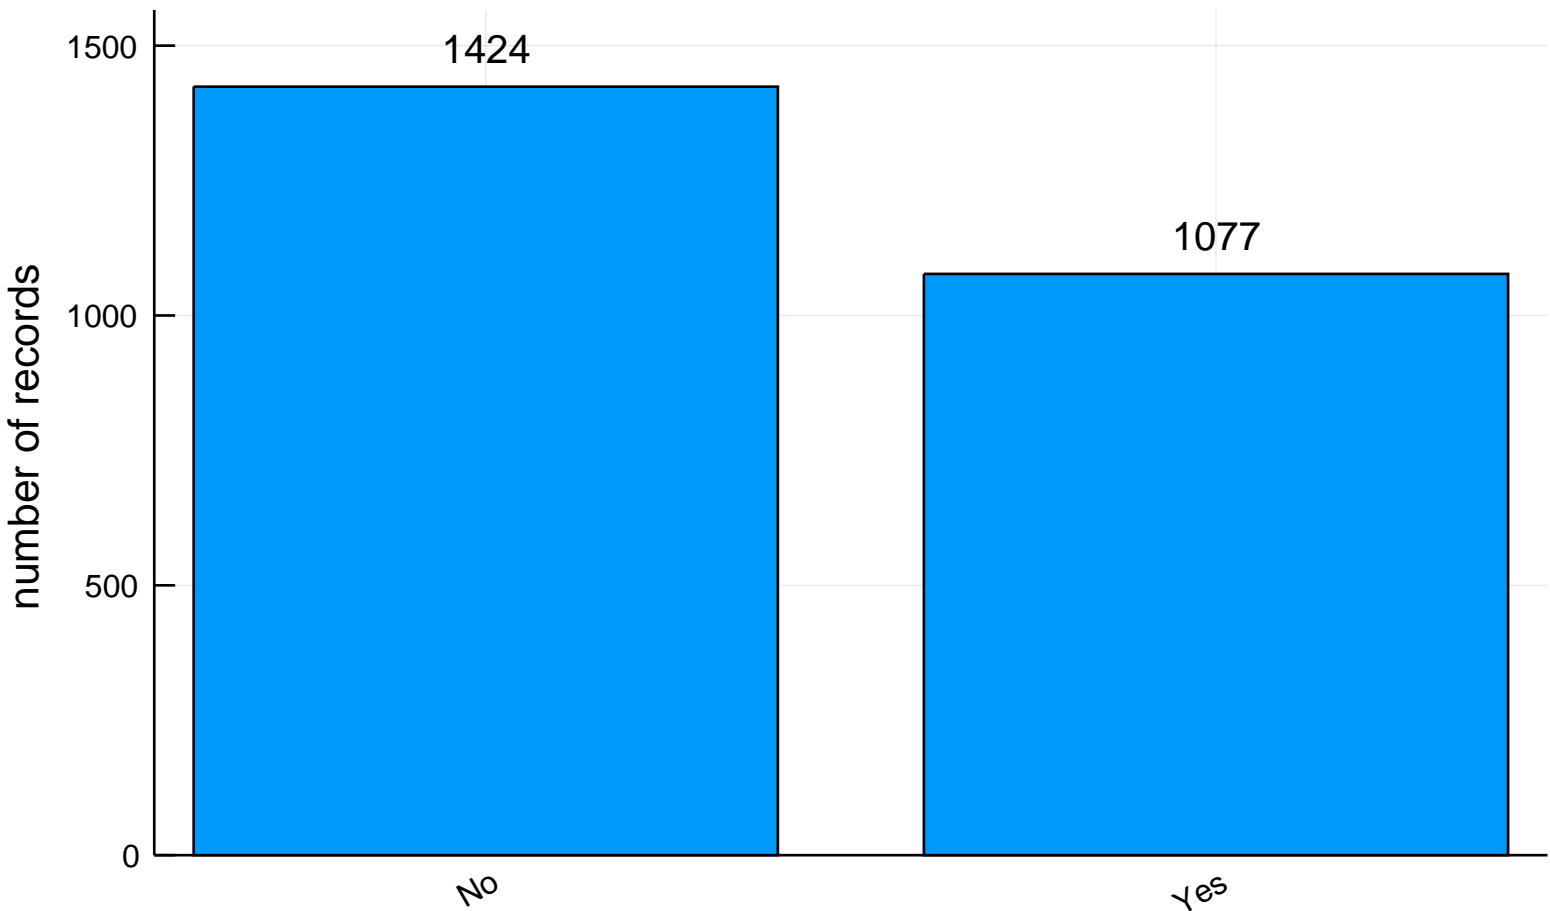

797 NAs

# x5a How would you rate your health today (per Participant\_ID)

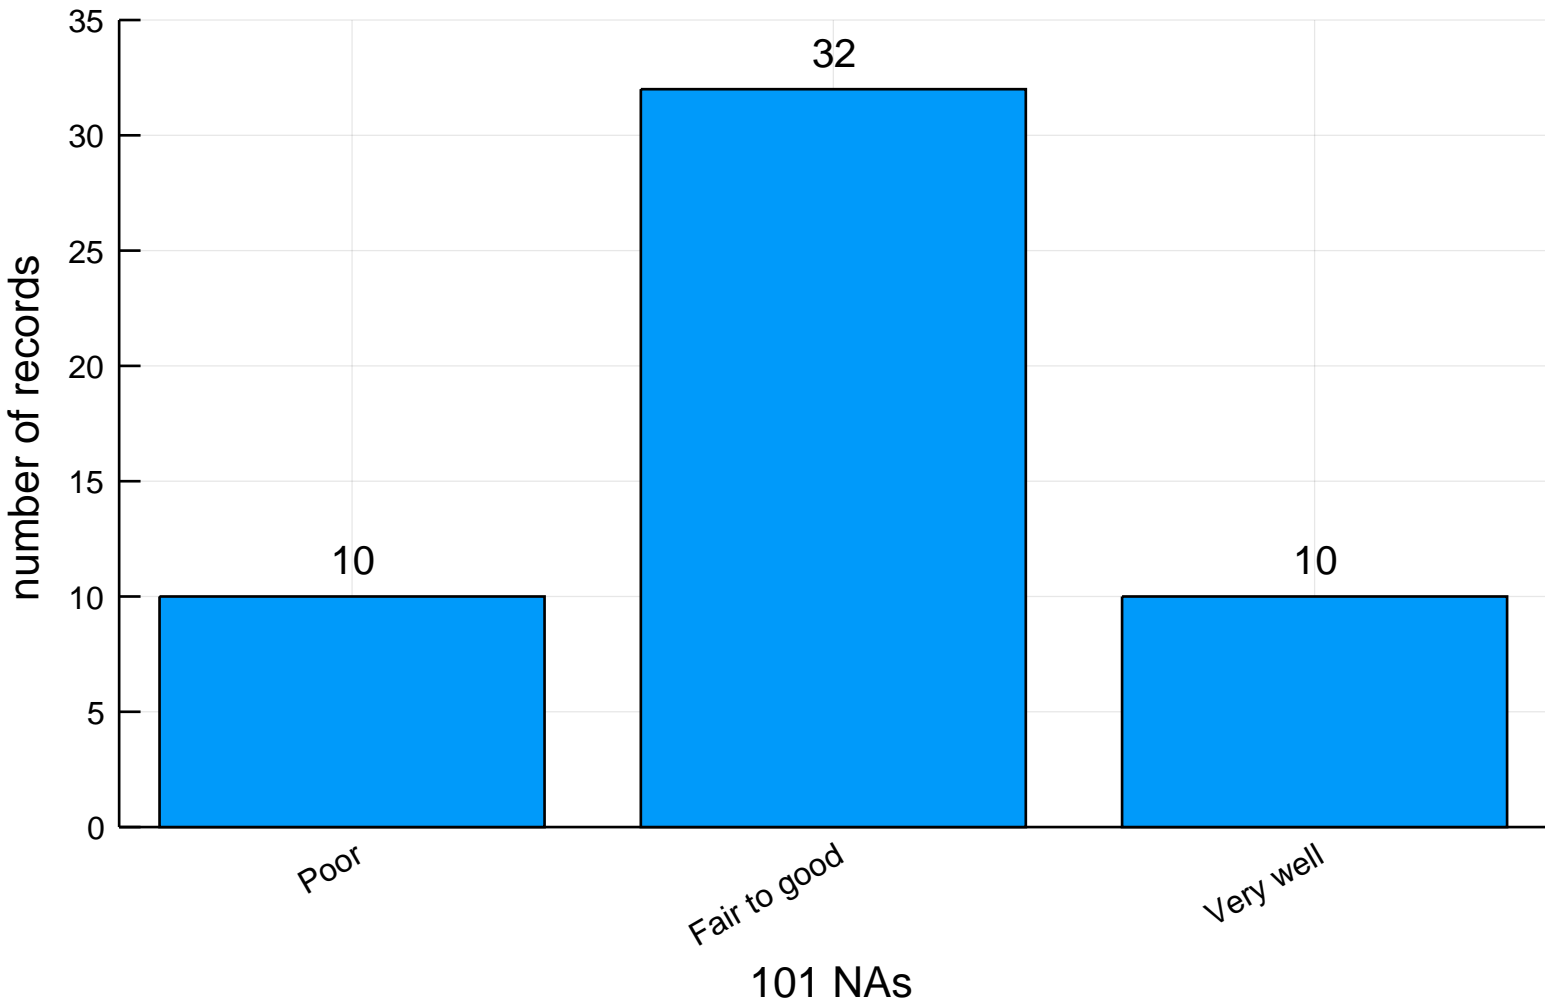

# x5b How would you rate your health today (per Participant\_ID)

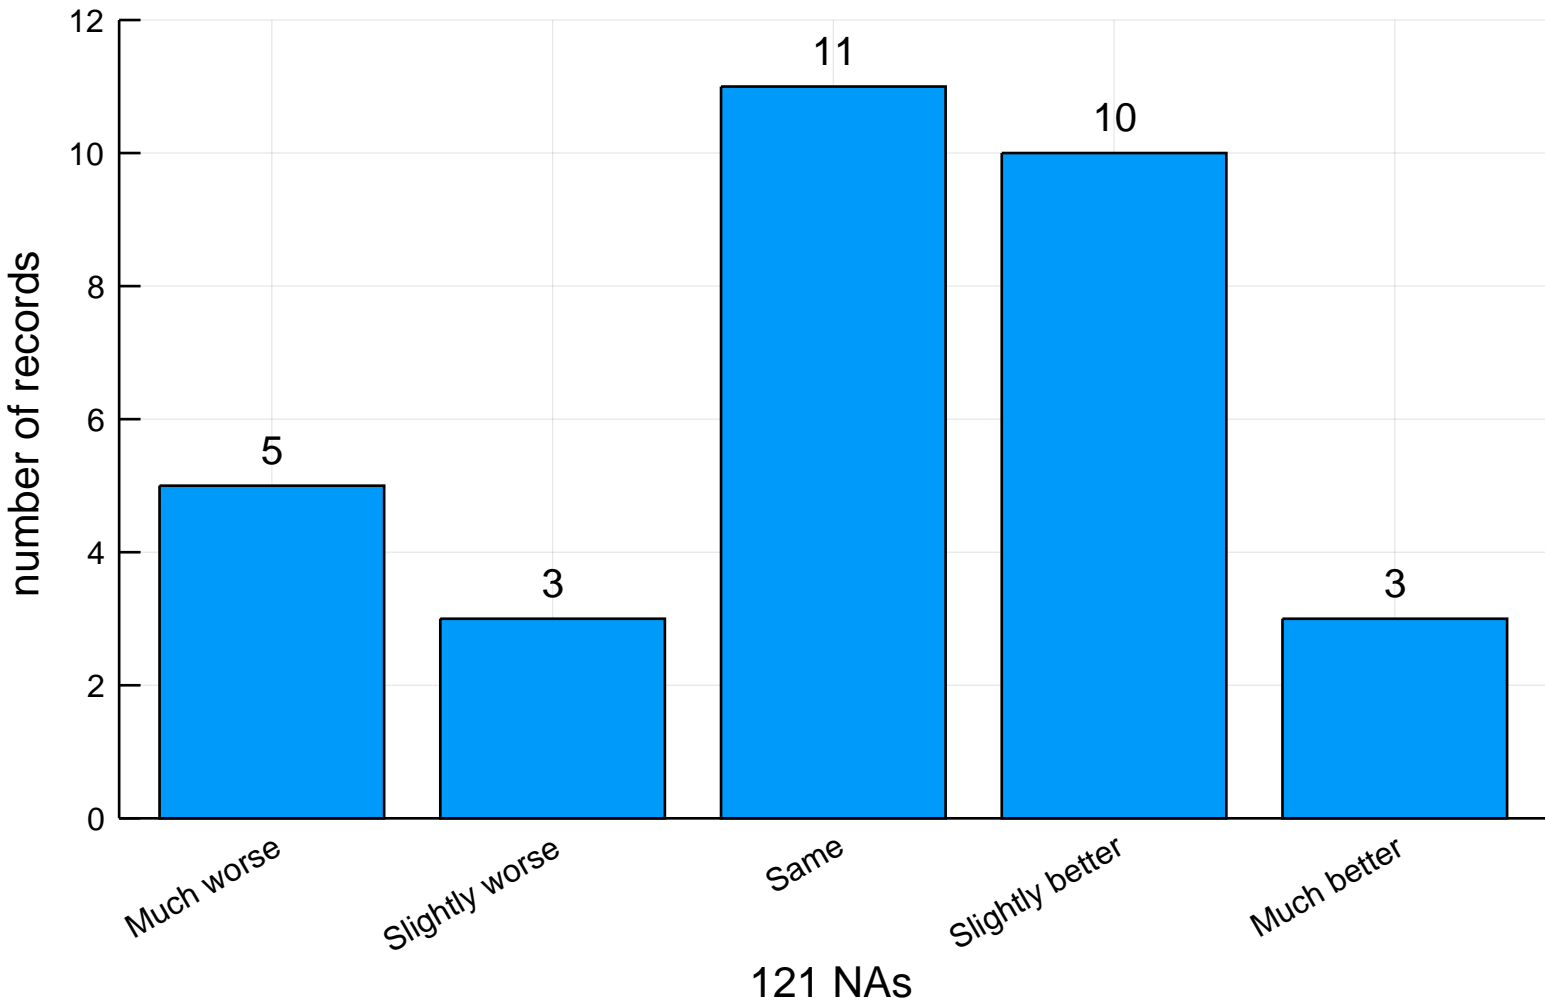

# x5 How often during the last two weeks h (per Participant\_ID)

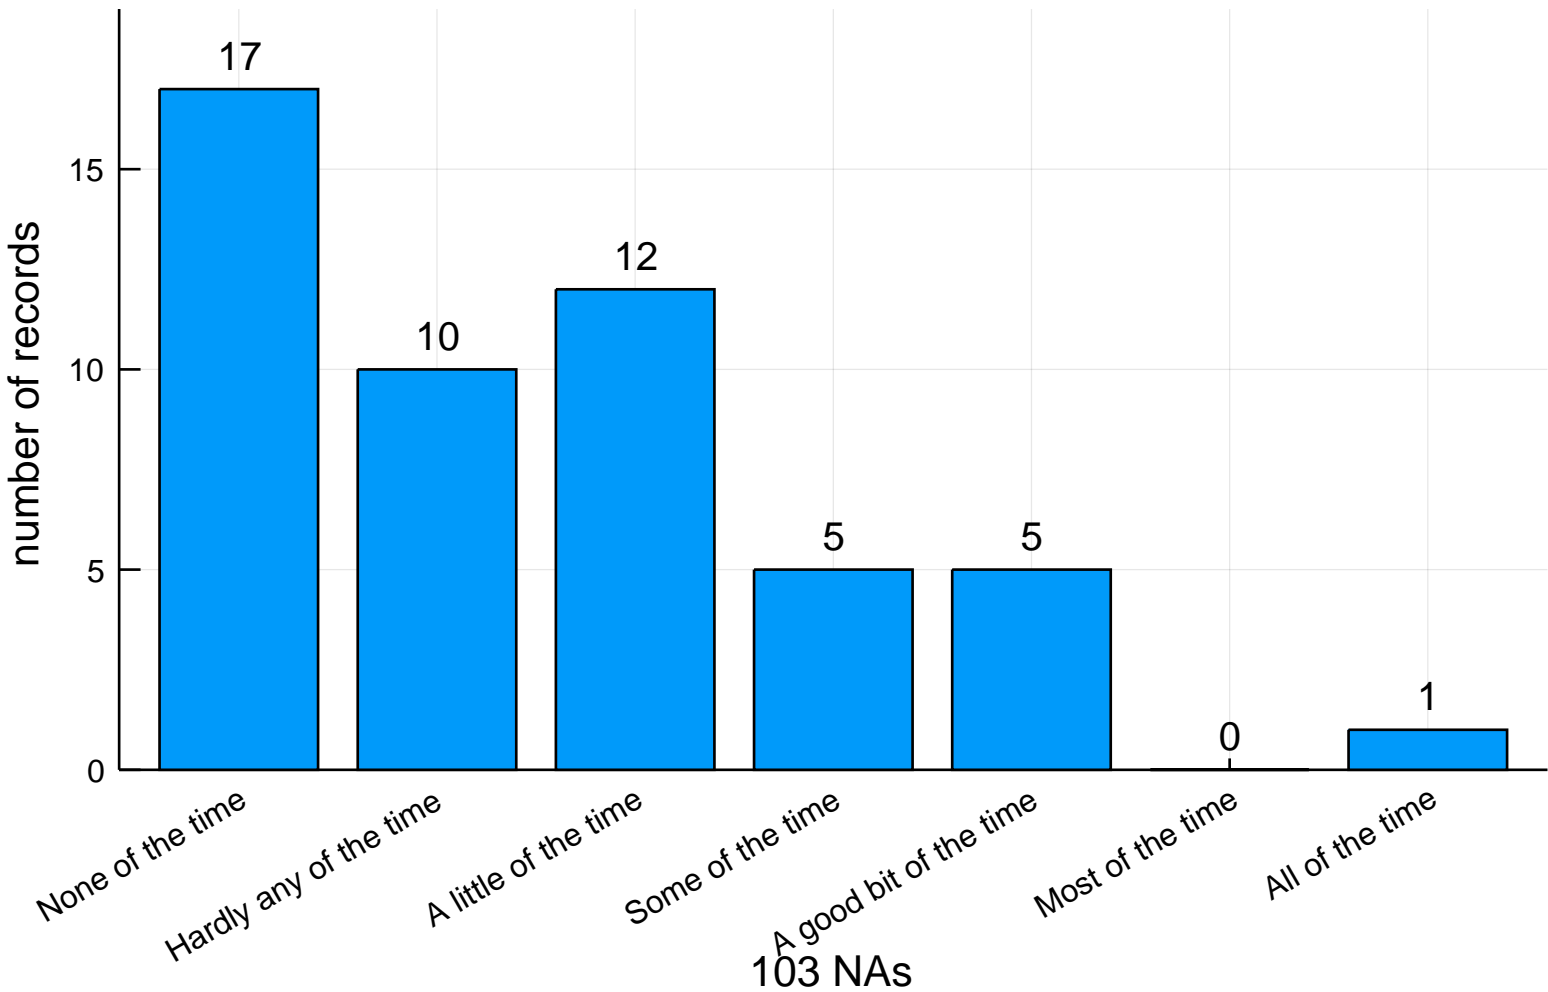

x5 In the past 2 weeks have you been hos (per site\_sub\_col

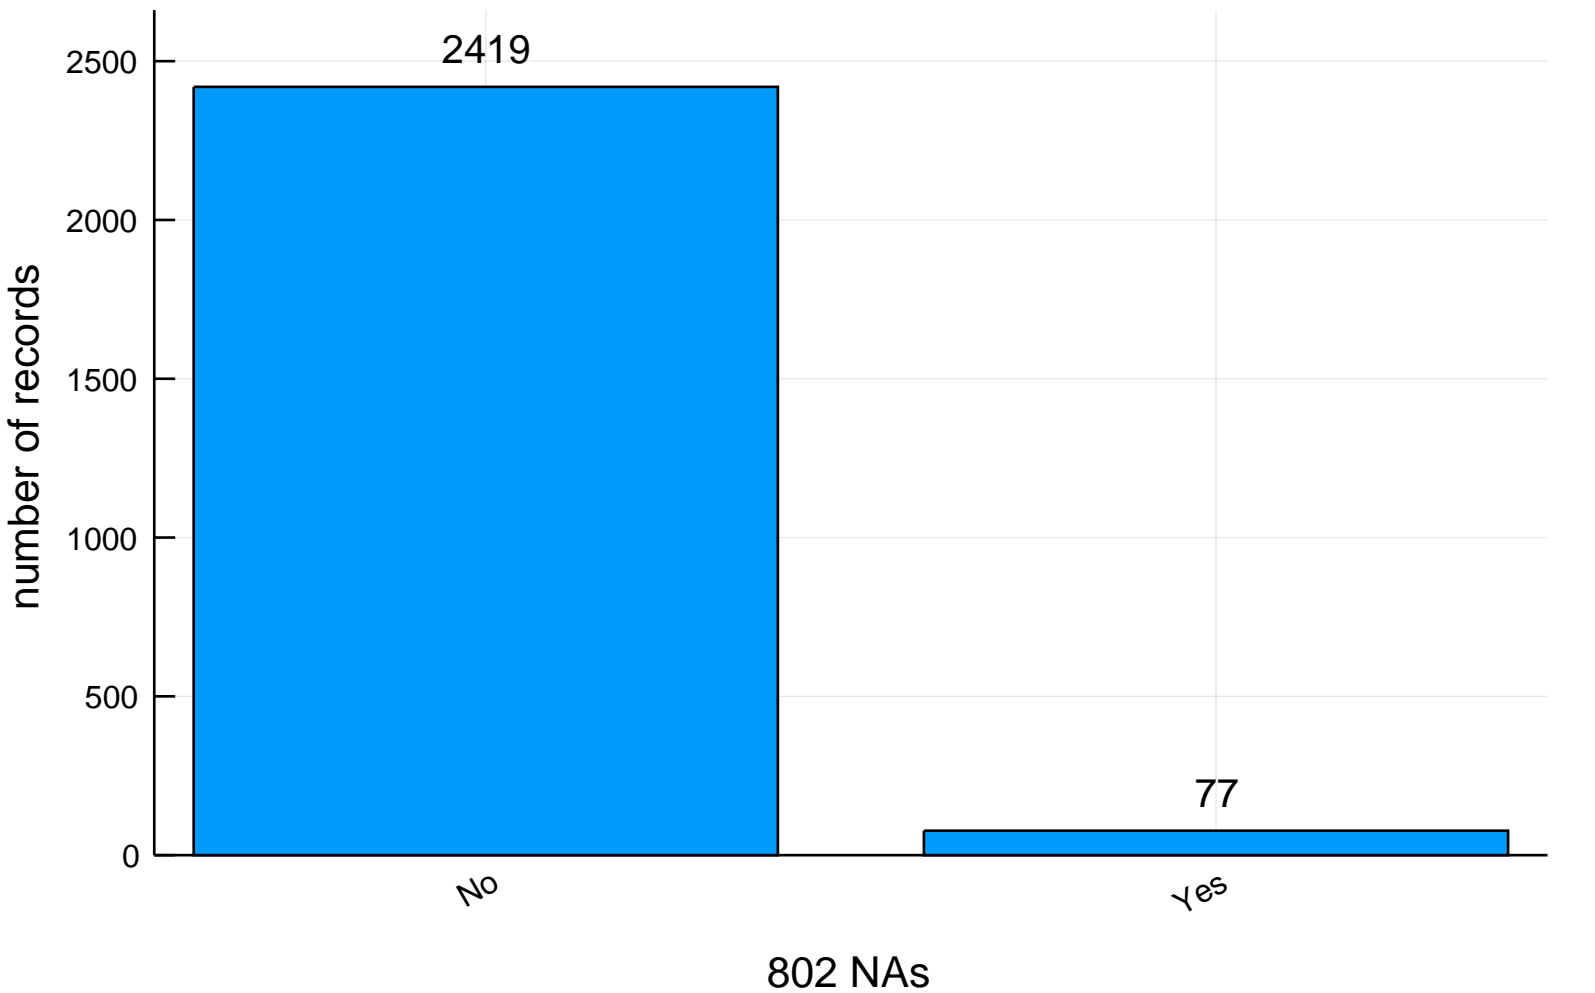



# x6 Have you ever had bowel surgery (per site\_sub\_coll)

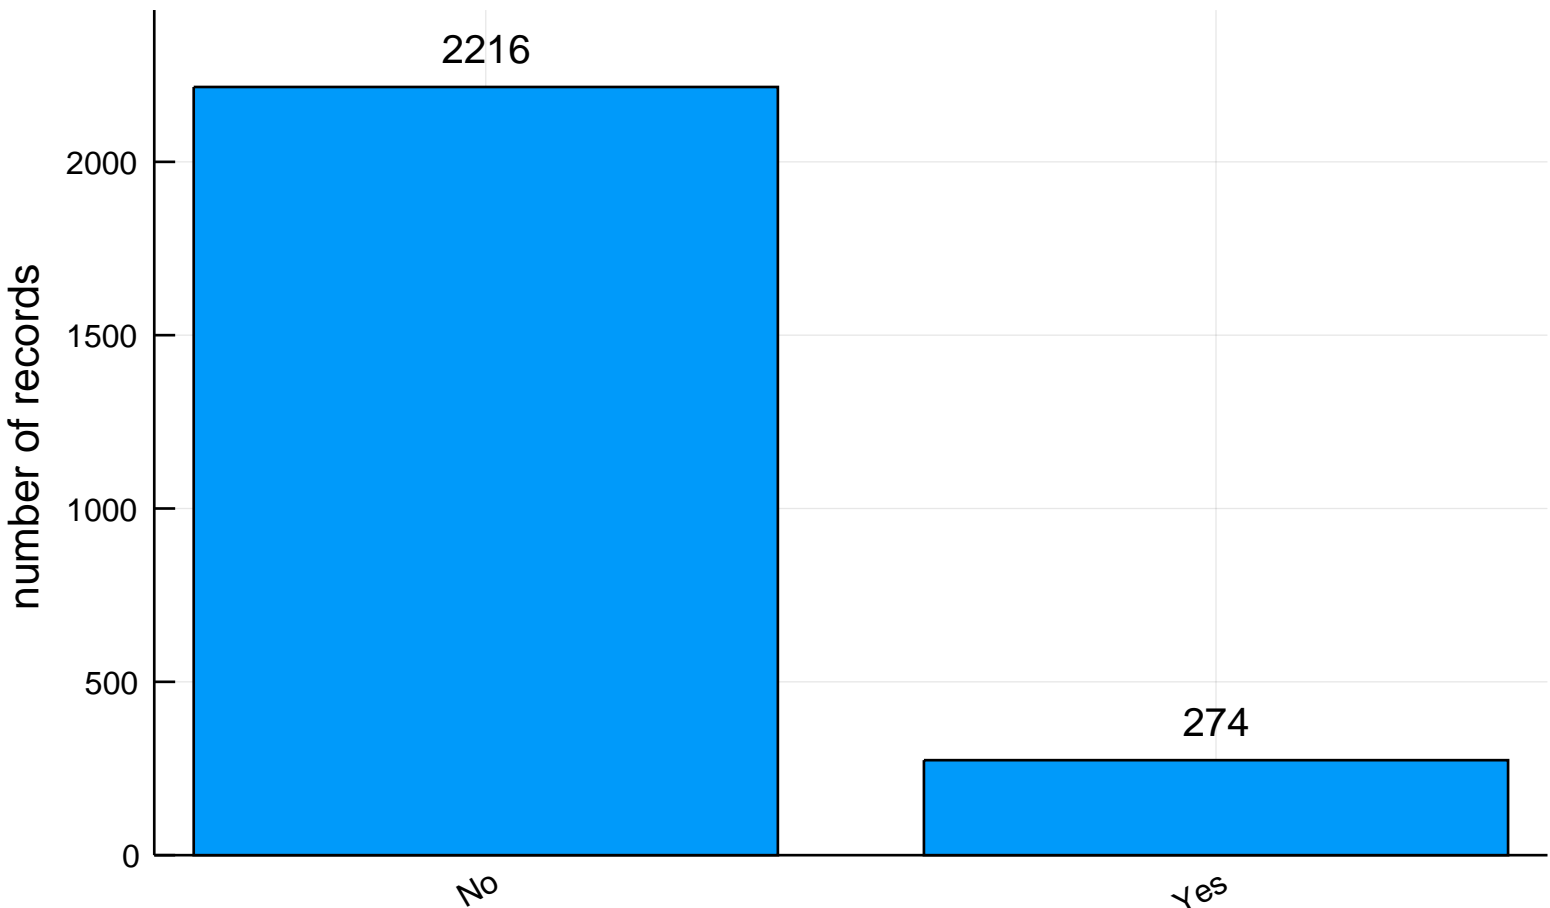

808 NAs

# x6 Problem with passing large amounts of (per Participant\_ID

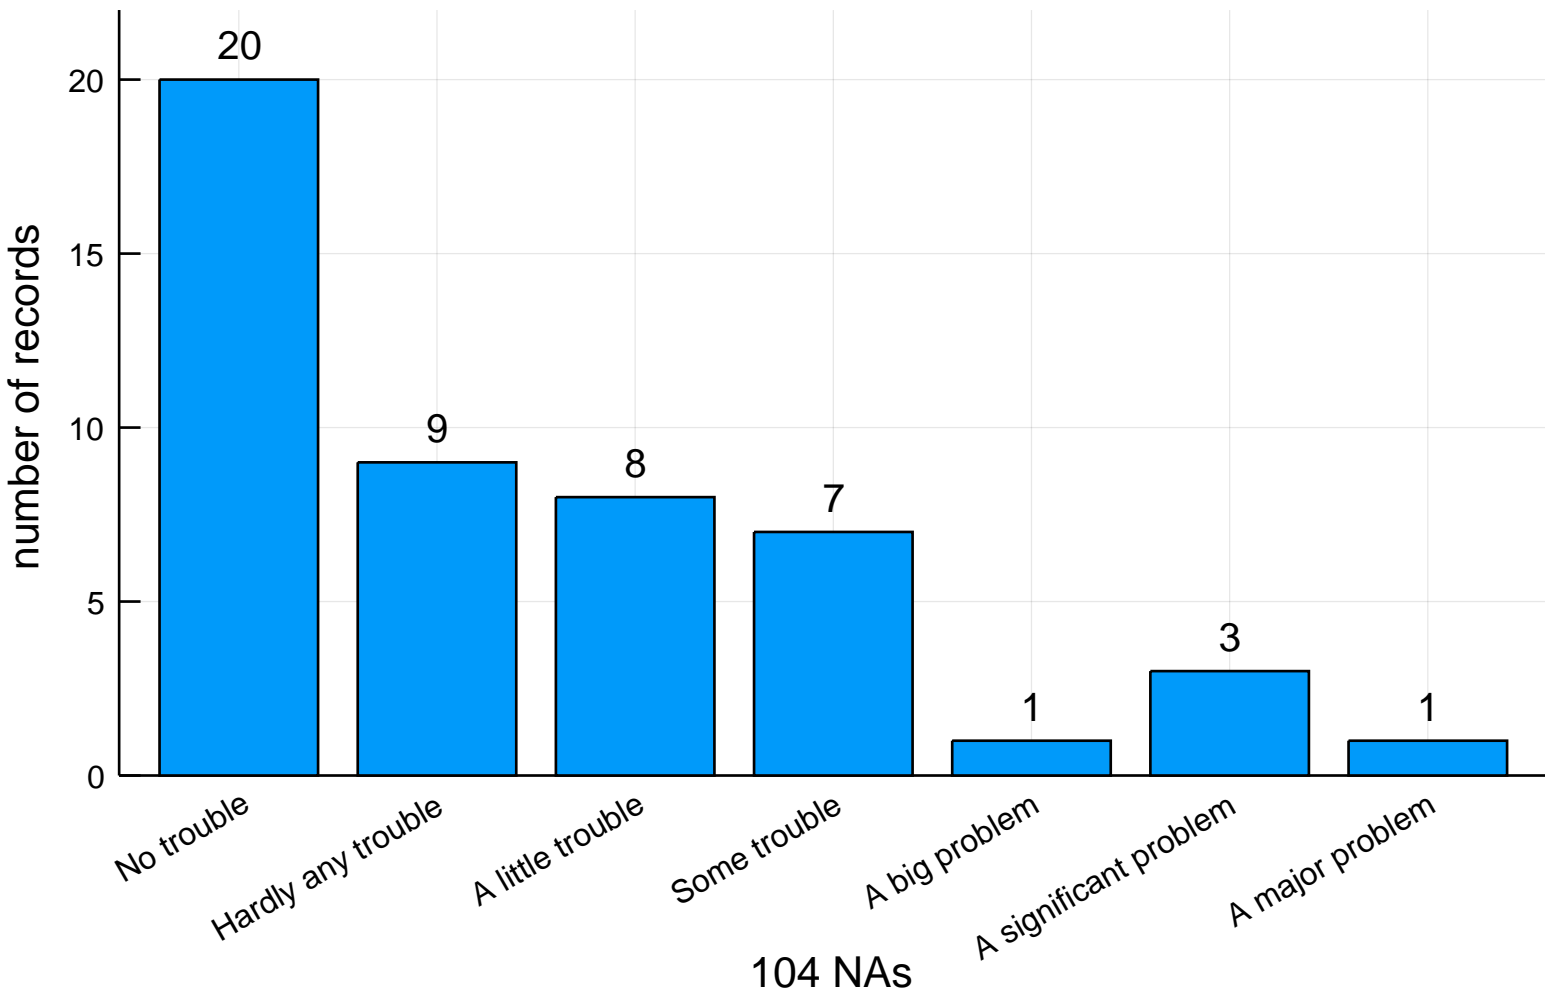

# x7 Problem with weight (per Participant\_ID)

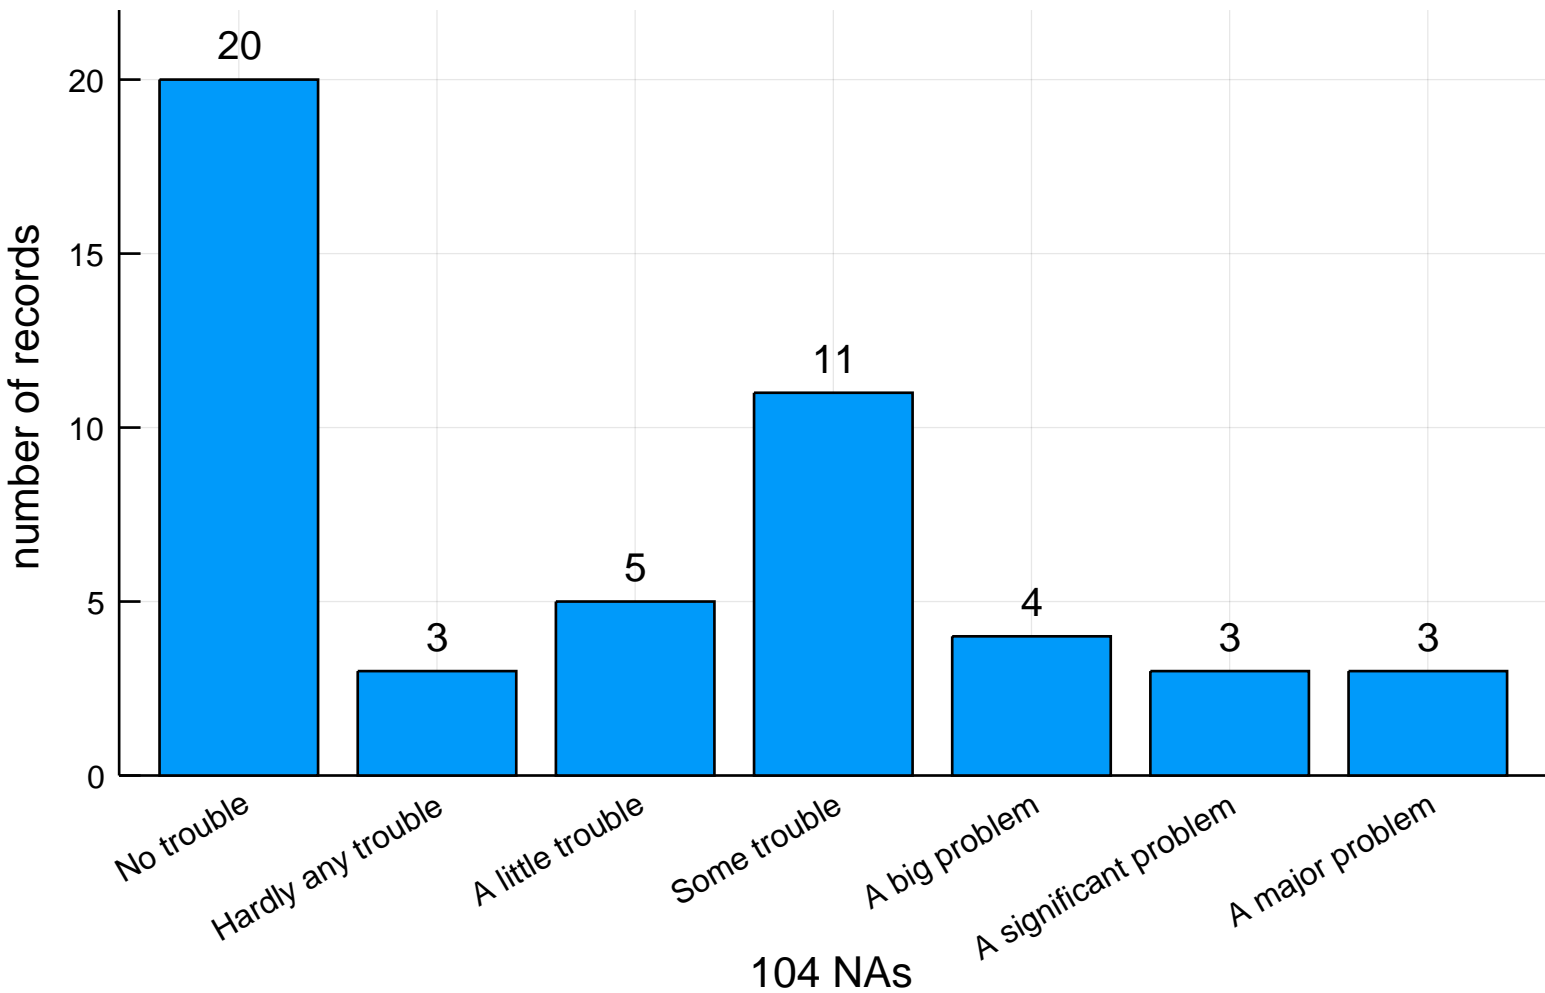

# x8 Felt relaxed and free of tension (per Participant\_ID)

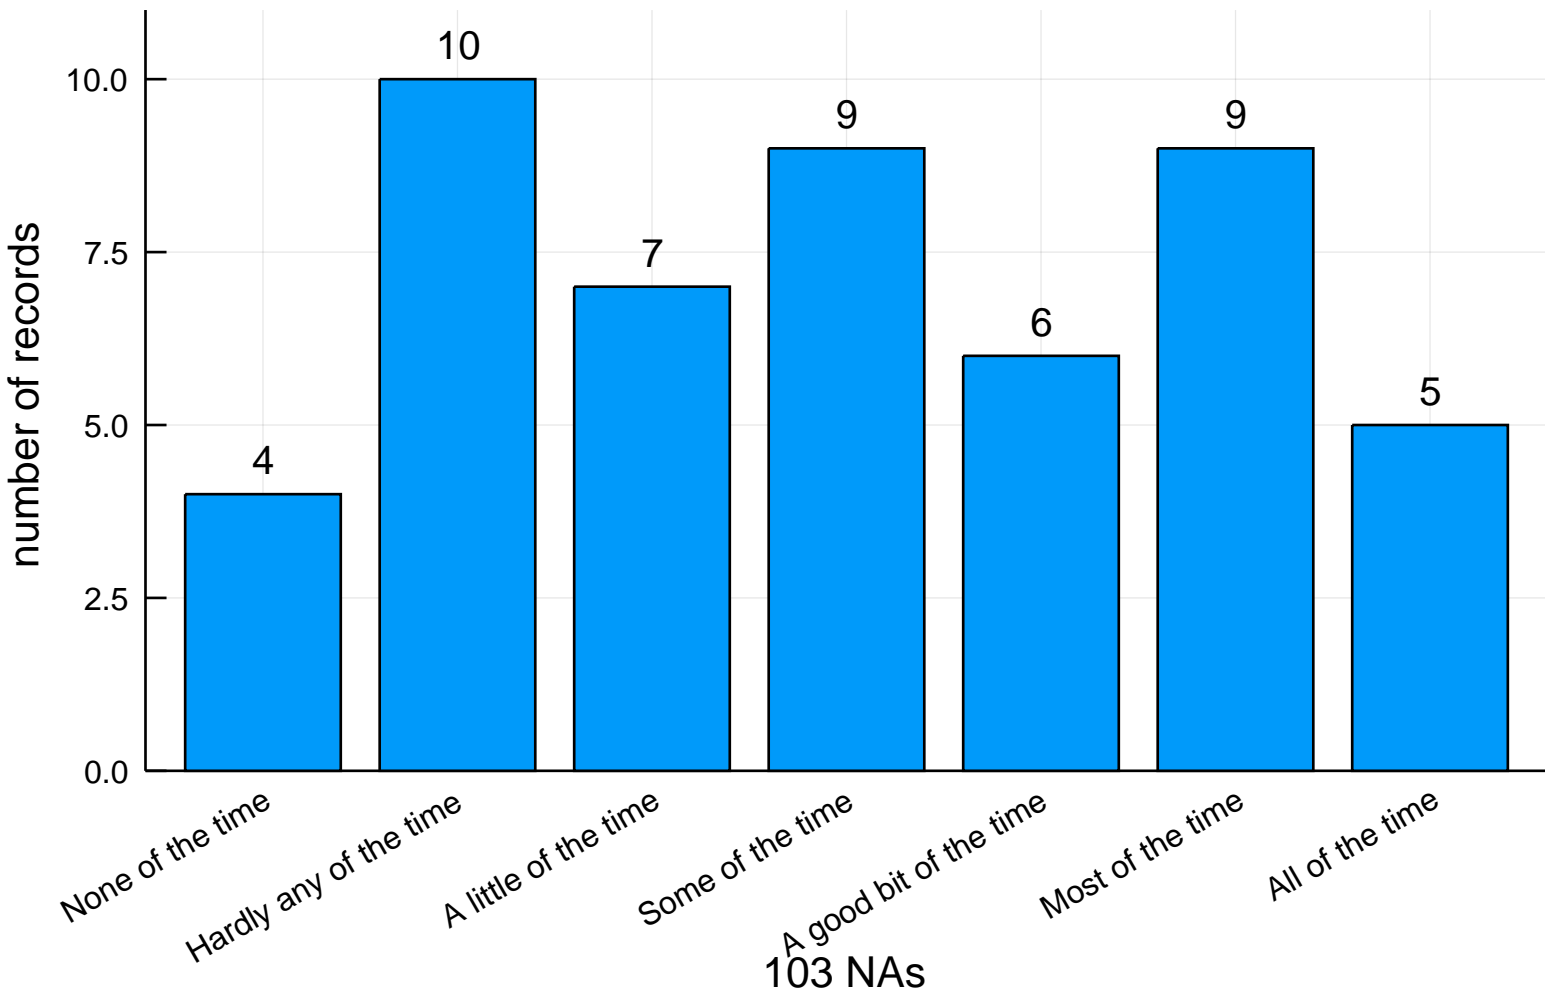

# x9 Troubled by a feeling of having to go (per Participant\_ID)

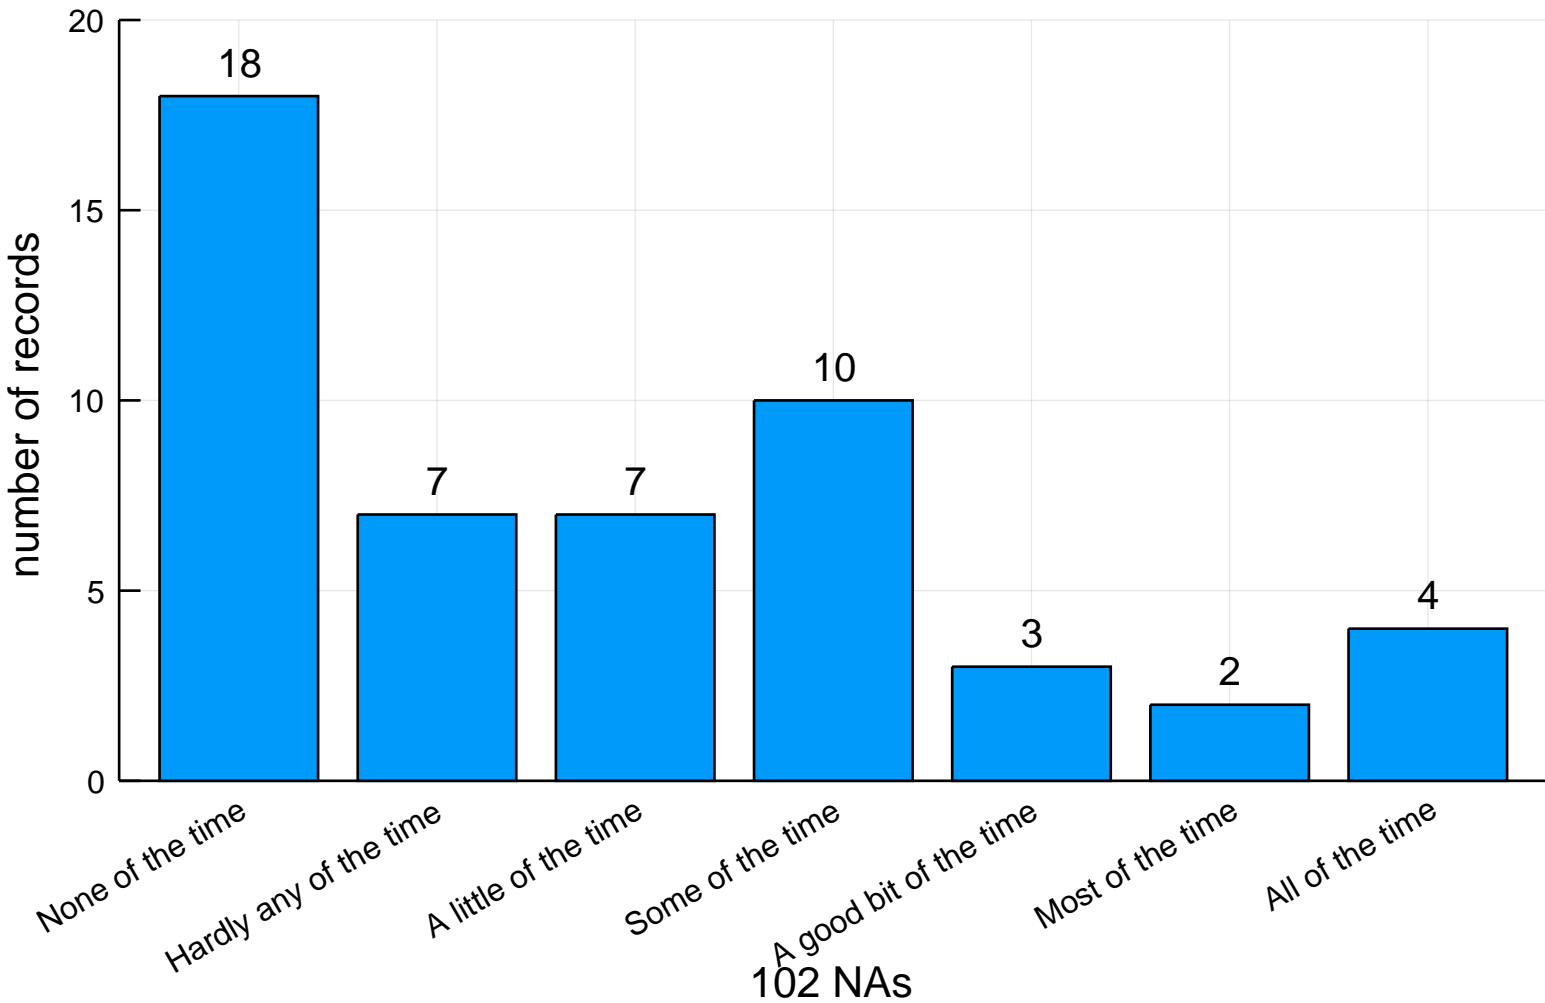

# x10 Felt angry as a result of bowel prob (per Participant\_ID)

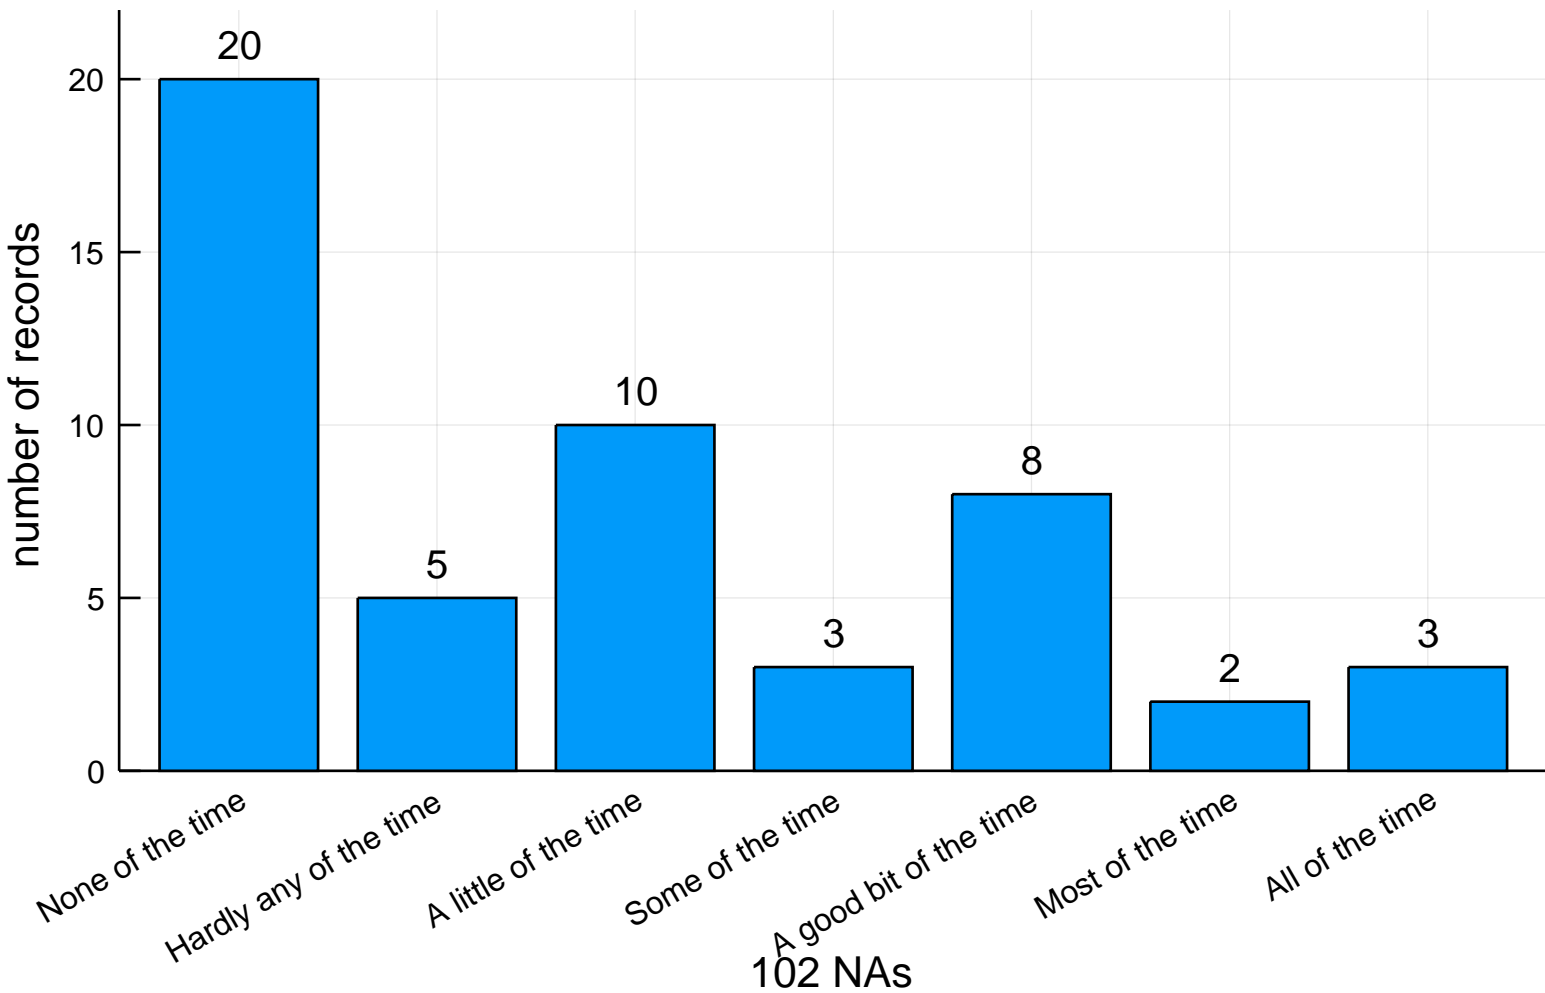

# Xifaxin rifaxamin (per site\_sub\_coll)

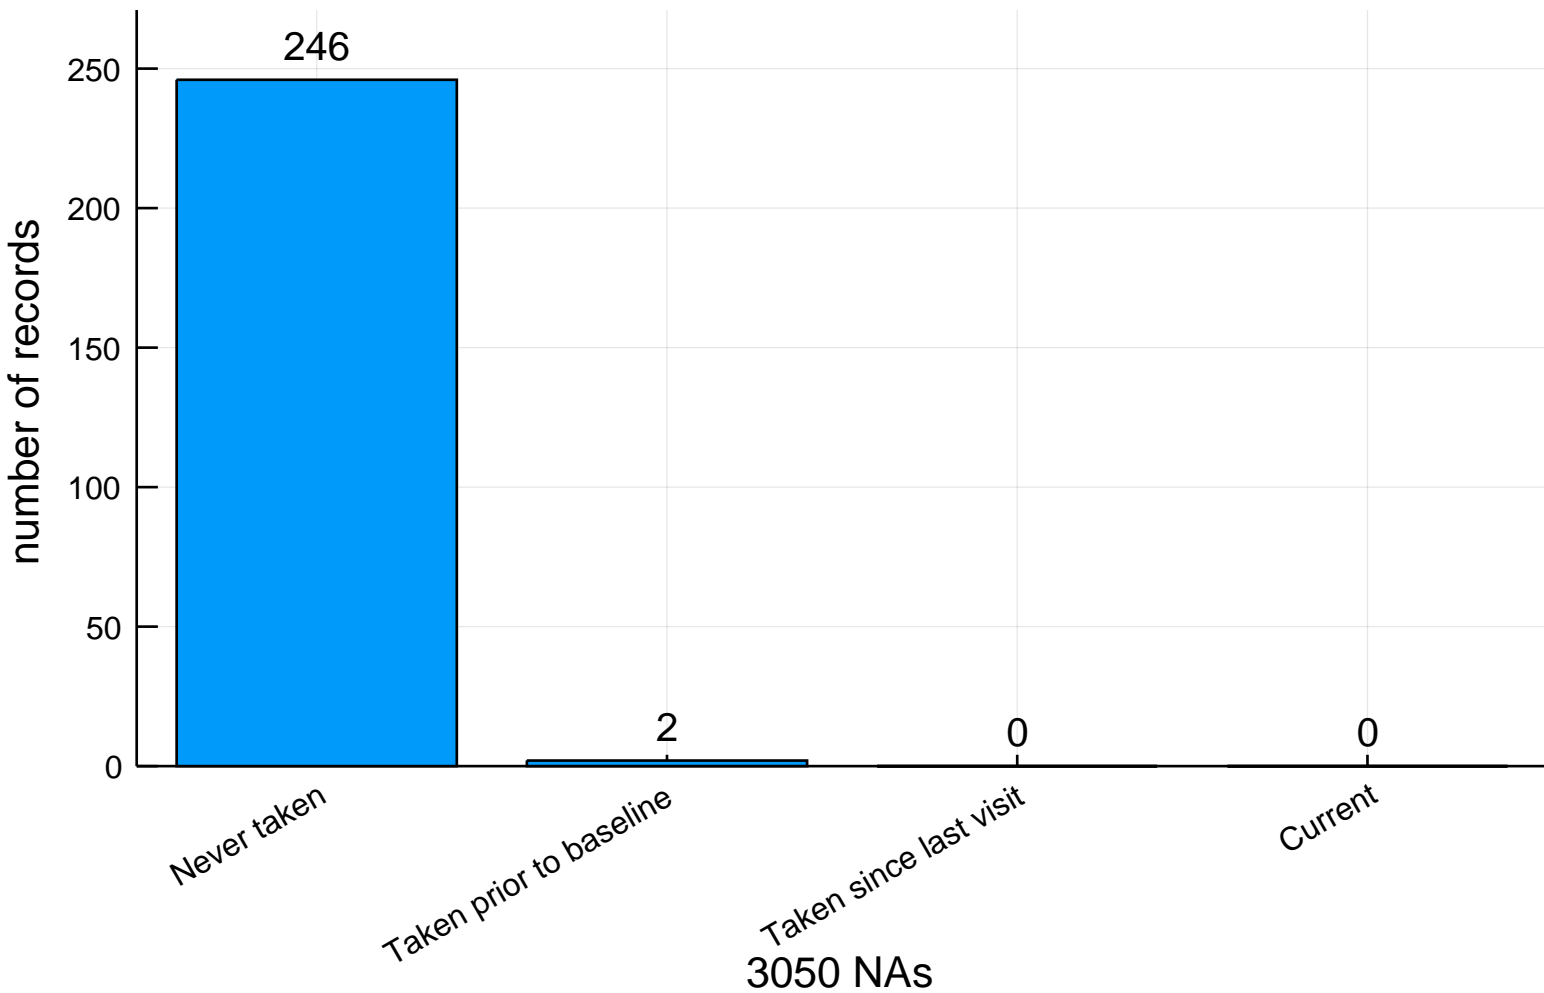

# Yogurt or other foods containing active (per site\_sub\_coll)

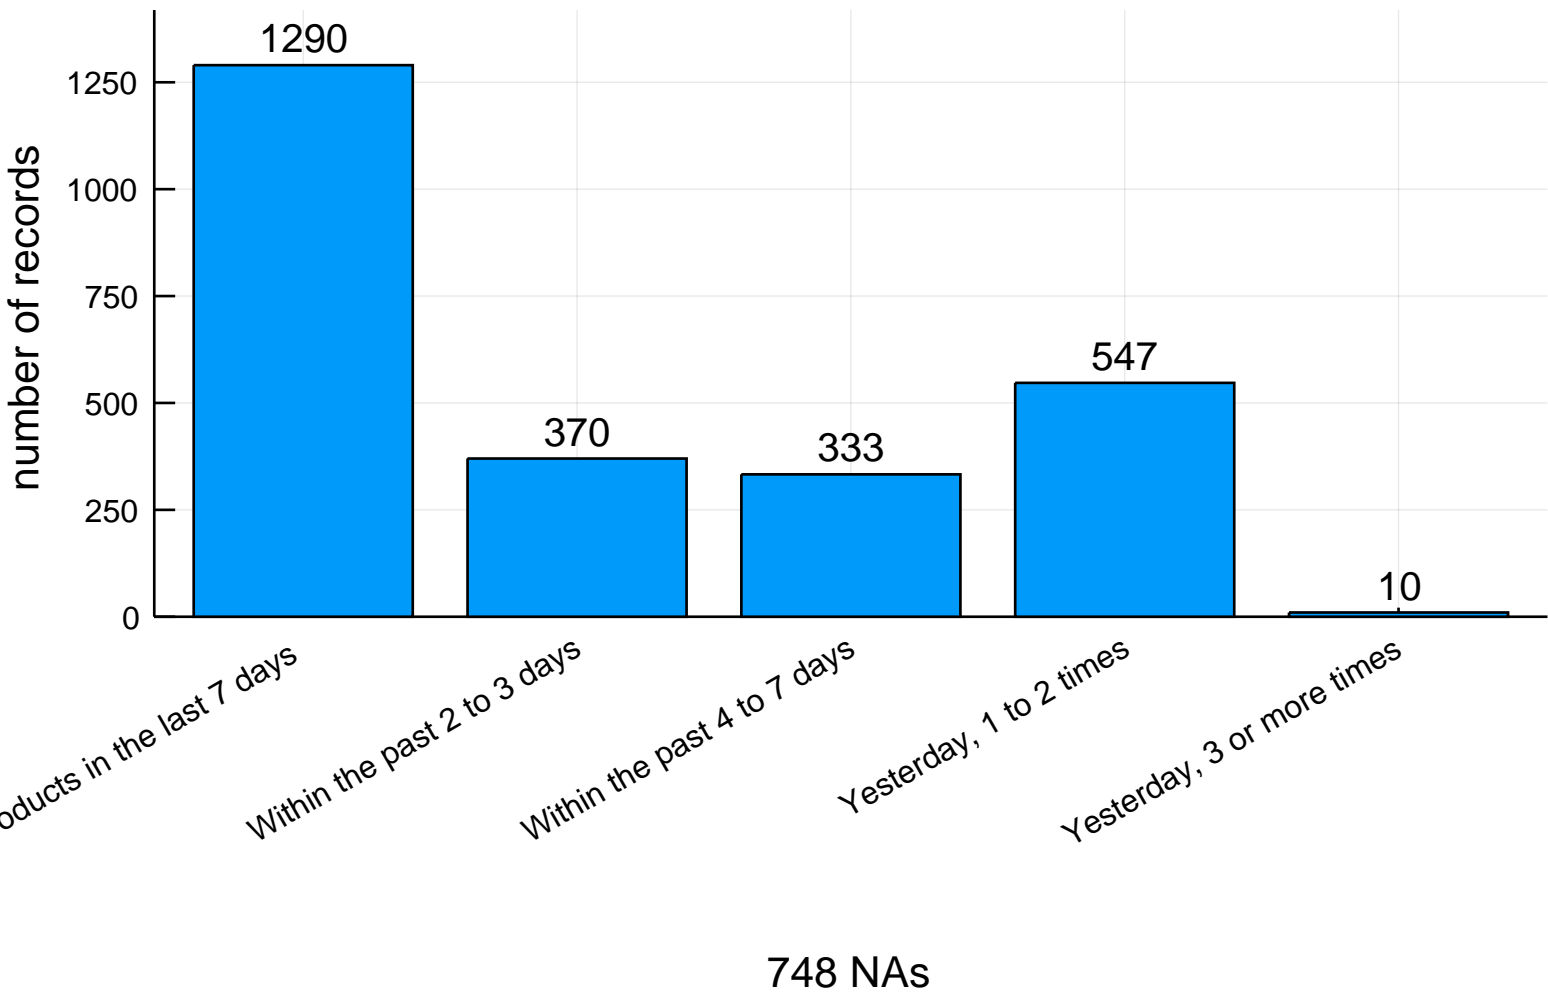

Supplement: 41586_2019_1237_MOESM5_ESM.pdf [file 41586_2019_1237_MOESM5_ESM.pdf]
